# Supplementary material for: Molecular basis of neurodegeneration in a mouse model of Polr3-related disease
Source: eLife journal article supplement (doi:10.7554/elife.95314), 2024-06-10

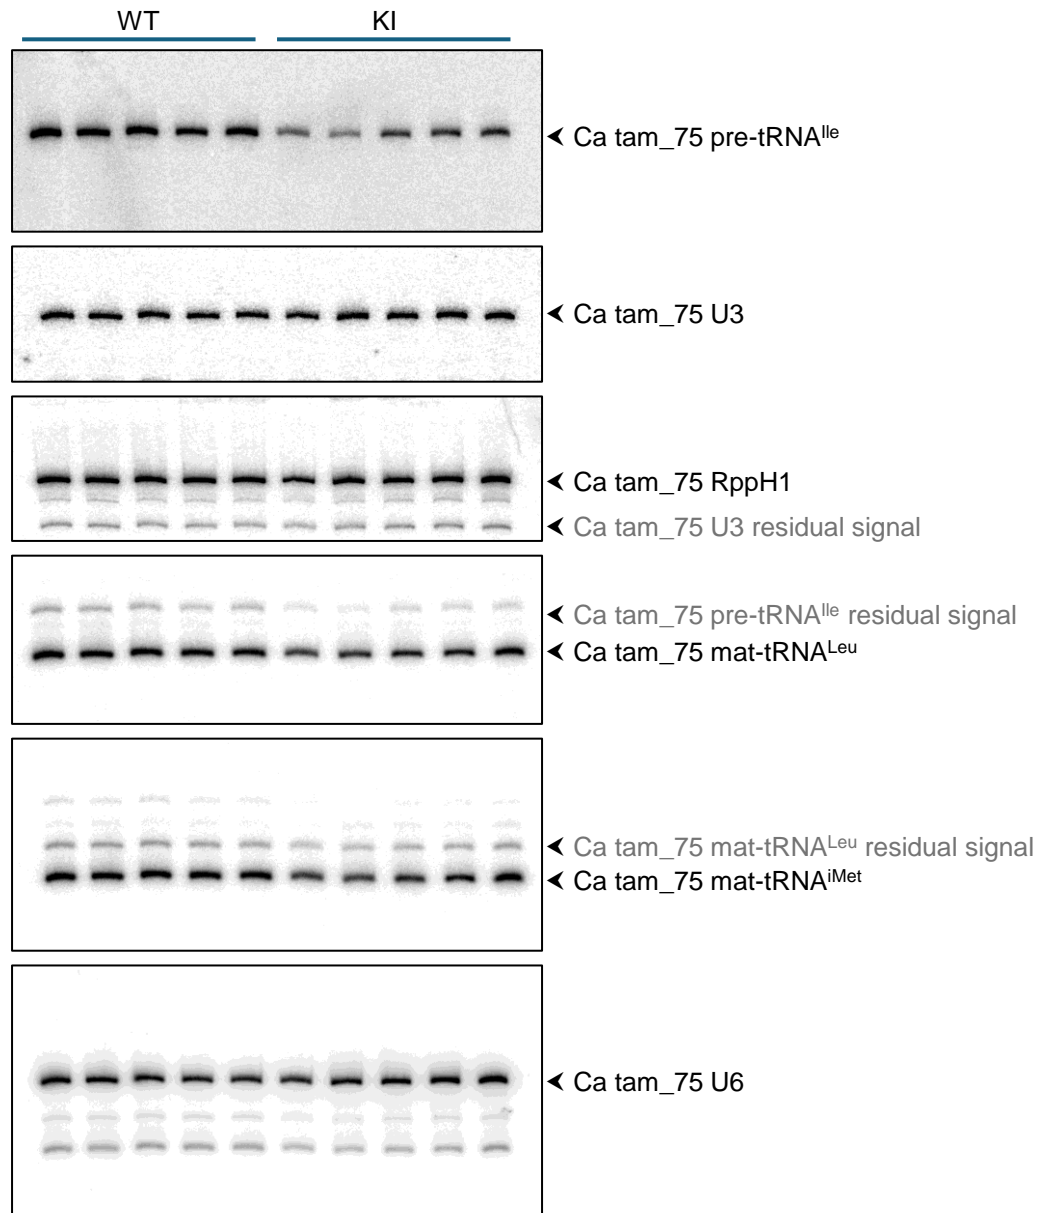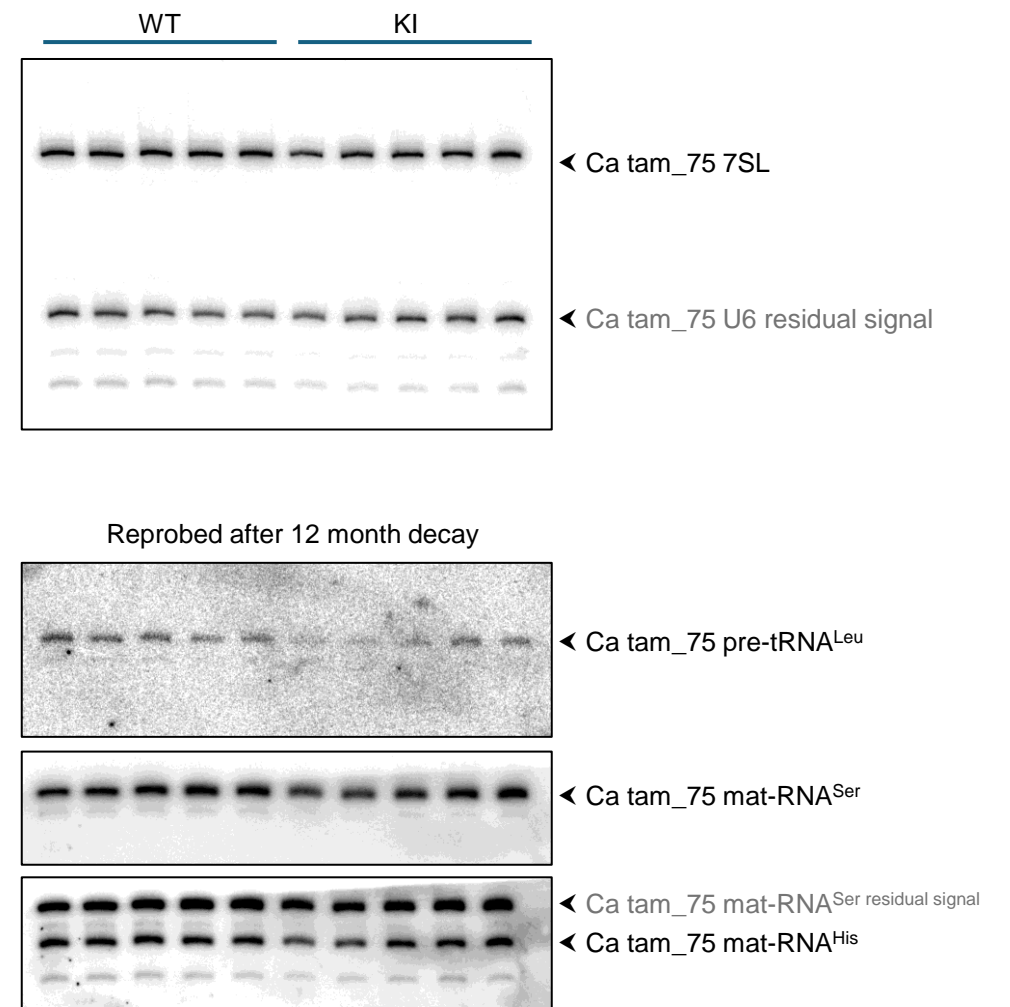

Supplement: fig3-data1 [file elife-95314-fig3-data1-v1.pdf]
