# Supplementary material for: Molecular basis of neurodegeneration in a mouse model of Polr3-related disease
Source: eLife. 2024 Nov 5;13:RP95314. doi: 10.7554/eLife.95314 (PMC11537486; doi:10.7554/eLife.95314)
Supplement: Supplementary file 1. [file elife-95314-supp1.xlsx]

## Sheet: Legend Table S1
Supplementary File 1. RNAseq analysis of WT and Polr3a-tamKI cerebra at P75. Tabs ordered from left to right contain (i) DESeq2 results for all genes, (ii) all DE genes with padj < 0.05, (iii) ISR gene overlap as defined in Torrence et al (2021) Elife 10, e63326, (iv) ATF4-dependent ISR gene overlap as defined in Torrence et al (2021) Elife 10, e63326, (v) and (vi) Metascape pathway enrichment fo…

## Sheet:  DESeq2 P75_Ca
Gene ID	baseMean	log2FoldChange	lfcSE	stat	pvalue	padj	Gene Name
ENSMUSG00000020303	194.699	2.53603	0.173474	14.6191	2.12186e-48	3.72768e-44	Stc2
ENSMUSG00000028893	805.645	2.16557	0.152098	14.238	5.32284e-46	4.67558e-42	Sesn2
ENSMUSG00000025408	825.985	1.7934	0.128024	14.0082	1.38786e-44	8.12729e-41	Ddit3
ENSMUSG00000078853	285.914	2.94304	0.211903	13.8886	7.42611e-44	3.26155e-40	Igtp
ENSMUSG00000026456	607.816	1.51524	0.109772	13.8035	2.42899e-43	8.53449e-40	Cyb5r1
ENSMUSG00000019768	825.344	3.88797	0.287286	13.5335	9.92249e-42	2.90531e-38	Esr1
ENSMUSG00000025403	751.808	1.53242	0.113708	13.4769	2.13916e-41	5.36867e-38	Shmt2
ENSMUSG00000068744	348.472	2.39061	0.179263	13.3358	1.43362e-40	3.14823e-37	Psrc1
ENSMUSG00000031297	456.421	1.37778	0.10464	13.167	1.35977e-39	2.65427e-36	Slc7a3
ENSMUSG00000027313	330.993	1.98845	0.152737	13.0188	9.56966e-39	1.6812e-35	Chac1
ENSMUSG00000110631	363.553	2.13606	0.167677	12.7391	3.58604e-37	5.72723e-34	Gm42047
ENSMUSG00000034422	332.743	2.72414	0.219927	12.3865	3.09086e-35	4.52501e-32	Parp14
ENSMUSG00000029561	1320.67	4.92993	0.398973	12.3565	4.49139e-35	6.0696e-32	Oasl2
ENSMUSG00000002083	266.852	1.85971	0.153094	12.1474	5.91849e-34	7.42687e-31	Bbc3
ENSMUSG00000074151	139.923	3.43919	0.287412	11.9661	5.35089e-33	6.26697e-30	Nlrc5
ENSMUSG00000002325	704.511	2.18577	0.183068	11.9397	7.3497e-33	8.06997e-30	Irf9
ENSMUSG00000031960	4407.39	0.767767	0.0655453	11.7135	1.08665e-31	1.12295e-28	Aars
ENSMUSG00000074896	1352.22	4.19881	0.361403	11.6181	3.33583e-31	3.25577e-28	Ifit3
ENSMUSG00000016496	229.56	3.05623	0.265613	11.5063	1.22559e-30	1.13322e-27	Cd274
ENSMUSG00000040483	367.118	2.63751	0.229552	11.4898	1.48384e-30	1.30341e-27	Xaf1
ENSMUSG00000025498	676.907	4.75116	0.420104	11.3095	1.17773e-29	9.85252e-27	Irf7
ENSMUSG00000028268	501.529	3.63202	0.322431	11.2645	1.96508e-29	1.5692e-26	Gbp3
ENSMUSG00000026896	332.444	2.41016	0.217487	11.0819	1.53661e-28	1.17371e-25	Ifih1
ENSMUSG00000024587	4731.89	0.72173	0.0653978	11.036	2.56175e-28	1.8752e-25	Nars
ENSMUSG00000035692	337.681	4.39252	0.410296	10.7057	9.56646e-27	6.72254e-24	Isg15
ENSMUSG00000060519	384.979	2.09977	0.196595	10.6807	1.25284e-26	8.46535e-24	Tor3a
ENSMUSG00000091549	147.891	2.48171	0.232493	10.6743	1.34257e-26	8.73566e-24	Gm6548
ENSMUSG00000062488	532.295	3.93176	0.369855	10.6305	2.14913e-26	1.34842e-23	Ifit3b
ENSMUSG00000052684	1732.51	1.2954	0.122118	10.6077	2.7444e-26	1.66254e-23	Jun
ENSMUSG00000057596	125.476	3.24255	0.310821	10.4322	1.76715e-25	1.03484e-22	Trim30d
ENSMUSG00000028811	2702.06	0.747788	0.0722145	10.3551	3.96782e-25	2.2486e-22	Yars
ENSMUSG00000073555	71.0563	4.47273	0.434489	10.2942	7.48268e-25	3.9835e-22	Gm4951
ENSMUSG00000070327	1263.54	3.20404	0.311193	10.296	7.34772e-25	3.9835e-22	Rnf213
ENSMUSG00000079017	171.44	4.62012	0.45026	10.261	1.05581e-24	5.33363e-22	Ifi27l2a
ENSMUSG00000068739	4122.46	0.662517	0.0645702	10.2604	1.0626e-24	5.33363e-22	Sars
ENSMUSG00000032690	128.021	3.34785	0.328419	10.1938	2.11259e-24	1.03094e-21	Oas2
ENSMUSG00000025492	683.922	2.71734	0.272967	9.95483	2.40239e-23	1.14068e-20	Ifitm3
ENSMUSG00000034459	811.816	4.61965	0.46534	9.92747	3.16168e-23	1.46169e-20	Ifit1
ENSMUSG00000005667	365.717	1.37065	0.138118	9.92379	3.2805e-23	1.47774e-20	Mthfd2
ENSMUSG00000024521	196.114	2.59627	0.262724	9.88214	4.97572e-23	2.18534e-20	Pmaip1
ENSMUSG00000030107	304.802	4.27936	0.434636	9.84586	7.14281e-23	3.06061e-20	Usp18
ENSMUSG00000046718	450.353	3.8492	0.394407	9.75948	1.68015e-22	7.02781e-20	Bst2
ENSMUSG00000027514	73.6661	4.99252	0.514283	9.70773	2.79502e-22	1.14193e-19	Zbp1
ENSMUSG00000010095	2812.97	0.716154	0.0738094	9.70276	2.93457e-22	1.17169e-19	Slc3a2
ENSMUSG00000075602	607.168	1.26499	0.130486	9.69443	3.18396e-22	1.24302e-19	Ly6a
ENSMUSG00000029298	196.906	2.23842	0.232903	9.61094	7.18869e-22	2.74546e-19	Gbp9
ENSMUSG00000105504	191.907	2.57826	0.269676	9.56061	1.1707e-21	4.37591e-19	Gbp5
ENSMUSG00000073418	2533.17	3.00731	0.315545	9.53053	1.56476e-21	5.6209e-19	C4b
ENSMUSG00000022906	204.44	2.50829	0.263191	9.53034	1.56776e-21	5.6209e-19	Parp9
ENSMUSG00000019326	74.9984	2.94504	0.310398	9.48794	2.35635e-21	8.27929e-19	Aoc3
ENSMUSG00000040033	970.568	1.6636	0.175977	9.45354	3.27559e-21	1.12835e-18	Stat2
ENSMUSG00000039304	104.642	1.79202	0.190048	9.42933	4.12725e-21	1.39438e-18	Tnfsf10
ENSMUSG00000032715	60.9434	2.64766	0.28152	9.40488	5.2091e-21	1.72667e-18	Trib3
ENSMUSG00000023249	162.237	2.08957	0.222268	9.40111	5.39896e-21	1.75646e-18	Parp3
ENSMUSG00000106734	121.594	2.37021	0.253403	9.35352	8.47793e-21	2.65965e-18	Gm20559
ENSMUSG00000086290	353.861	1.29085	0.137997	9.35422	8.42204e-21	2.65965e-18	Snhg12
ENSMUSG00000035352	59.8875	4.02699	0.431442	9.33379	1.02151e-20	3.1484e-18	Ccl12
ENSMUSG00000026104	688.385	2.68681	0.288052	9.32754	1.08357e-20	3.28209e-18	Stat1
ENSMUSG00000064215	798.252	1.38458	0.148718	9.3101	1.27707e-20	3.80265e-18	Ifi27
ENSMUSG00000033355	278.919	3.63861	0.390901	9.30828	1.29917e-20	3.80396e-18	Rtp4
ENSMUSG00000038507	497.894	1.81373	0.195136	9.29471	1.47601e-20	4.25092e-18	Parp12
ENSMUSG00000031490	90.2129	1.92207	0.206863	9.29153	1.52086e-20	4.30942e-18	Eif4ebp1
ENSMUSG00000074968	1753.92	-1.29925	0.140038	-9.27786	1.7292e-20	4.822e-18	Ano3
ENSMUSG00000023067	1134.86	1.41164	0.152349	9.26588	1.93482e-20	5.31109e-18	Cdkn1a
ENSMUSG00000033880	1673.79	3.17373	0.343865	9.22958	2.71694e-20	7.34326e-18	Lgals3bp
ENSMUSG00000054206	107.323	2.5691	0.278465	9.22594	2.81087e-20	7.48202e-18	Gzmm
ENSMUSG00000024359	4814.01	0.542296	0.0588235	9.21904	2.99779e-20	7.86047e-18	Hspa9
ENSMUSG00000020641	291.337	4.01003	0.436401	9.18887	3.97004e-20	1.02567e-17	Rsad2
ENSMUSG00000000386	174.523	5.41508	0.590999	9.16259	5.06644e-20	1.27153e-17	Mx1
ENSMUSG00000040010	2351.4	0.856382	0.0934515	9.16392	5.00451e-20	1.27153e-17	Slc7a5
ENSMUSG00000040424	1272.83	-0.939376	0.103006	-9.11967	7.53549e-20	1.86456e-17	Hipk4
ENSMUSG00000022385	82.414	3.72373	0.410359	9.07433	1.14383e-19	2.79096e-17	Gtse1
ENSMUSG00000037921	198.432	4.07313	0.449446	9.06256	1.27426e-19	3.06659e-17	Ddx60
ENSMUSG00000029826	306.556	1.87665	0.2077	9.03537	1.6345e-19	3.88039e-17	Zc3hav1
ENSMUSG00000028037	235.742	4.69622	0.519989	9.03138	1.69521e-19	3.97086e-17	Ifi44
ENSMUSG00000053461	51.547	3.31861	0.367862	9.02135	1.85783e-19	4.29451e-17	Hhipl2
ENSMUSG00000069793	83.9027	3.2477	0.365855	8.87702	6.86764e-19	1.56689e-16	Slfn9
ENSMUSG00000065590	72.0518	2.10324	0.237488	8.85618	8.28051e-19	1.86503e-16	Mir212
ENSMUSG00000022351	1005.48	-0.853879	0.0969711	-8.80549	1.30278e-18	2.89712e-16	Sqle
ENSMUSG00000026222	166.849	2.05946	0.234483	8.78301	1.59155e-18	3.49505e-16	Sp100
ENSMUSG00000105613	51.335	2.76028	0.316405	8.72387	2.68848e-18	5.75991e-16	Gm43684
ENSMUSG00000015312	364.066	1.1185	0.128208	8.72413	2.6824e-18	5.75991e-16	Gadd45b
ENSMUSG00000043263	45.9879	5.60839	0.643012	8.72207	2.73162e-18	5.78183e-16	Ifi209
ENSMUSG00000037321	280.948	3.01635	0.346091	8.71549	2.89516e-18	6.05503e-16	Tap1
ENSMUSG00000043279	313.556	1.56968	0.180306	8.70562	3.15841e-18	6.52788e-16	Trim56
ENSMUSG00000024338	126.899	2.65963	0.306072	8.68957	3.63814e-18	7.43195e-16	Psmb8
ENSMUSG00000026202	5403.54	-0.721464	0.0830768	-8.6843	3.81067e-18	7.69493e-16	Tuba4a
ENSMUSG00000027580	311.443	1.35035	0.155523	8.68263	3.86737e-18	7.72068e-16	Helz2
ENSMUSG00000039236	59.92	3.58472	0.41309	8.67781	4.03448e-18	7.9638e-16	Isg20
ENSMUSG00000064354	2575.63	-0.927968	0.106953	-8.67643	4.08381e-18	7.97159e-16	mt-Co2
ENSMUSG00000072620	94.6349	2.15708	0.248904	8.66631	4.46367e-18	8.61733e-16	Slfn2
ENSMUSG00000060550	104.07	2.9535	0.343062	8.60922	7.35589e-18	1.40466e-15	H2-Q7
ENSMUSG00000028270	274.686	2.98691	0.347143	8.60427	7.68015e-18	1.45081e-15	Gbp2
ENSMUSG00000073489	114.708	4.38767	0.510843	8.58907	8.7676e-18	1.63861e-15	Ifi204
ENSMUSG00000034855	293.647	6.06177	0.706786	8.57654	9.77739e-18	1.8081e-15	Cxcl10
ENSMUSG00000032596	211.824	2.27556	0.265441	8.57276	1.01032e-17	1.84888e-15	Uba7
ENSMUSG00000091649	48.6929	4.13929	0.490502	8.43887	3.20425e-17	5.80333e-15	Phf11b
ENSMUSG00000017830	108.557	2.76536	0.327861	8.43456	3.32464e-17	5.95993e-15	Dhx58
ENSMUSG00000069874	264.522	1.96243	0.232966	8.42365	3.64943e-17	6.47607e-15	Irgm2
ENSMUSG00000066861	41.8654	4.32604	0.514352	8.41066	4.07702e-17	7.16252e-15	Oas1g
ENSMUSG00000020638	793.704	1.24969	0.148669	8.40589	4.24642e-17	7.38626e-15	Cmpk2
ENSMUSG00000000682	85.3912	3.31507	0.394534	8.4025	4.37086e-17	7.52816e-15	Cd52
ENSMUSG00000023905	180.496	1.51496	0.180658	8.38584	5.03668e-17	8.59072e-15	Tnfrsf12a
ENSMUSG00000003379	44.2988	4.2364	0.506218	8.36871	5.82513e-17	9.83999e-15	Cd79a
ENSMUSG00000031026	1221.32	0.728275	0.0870927	8.36206	6.16315e-17	1.03118e-14	Trim66
ENSMUSG00000037405	102.169	2.15236	0.258943	8.31211	9.40183e-17	1.55822e-14	Icam1
ENSMUSG00000040253	352.46	2.72801	0.328534	8.30357	1.01029e-16	1.65877e-14	Gbp7
ENSMUSG00000026814	728.04	0.714636	0.0861952	8.2909	1.12397e-16	1.82832e-14	Eng
ENSMUSG00000046879	641.193	2.83646	0.346938	8.17568	2.94197e-16	4.74171e-14	Irgm1
ENSMUSG00000023341	218.496	3.78142	0.462846	8.16993	3.08564e-16	4.92804e-14	Mx2
ENSMUSG00000030609	623.616	1.1815	0.1455	8.12029	4.65083e-16	7.36088e-14	Aen
ENSMUSG00000000275	360.425	1.66625	0.205297	8.11631	4.80569e-16	7.53806e-14	Trim25
ENSMUSG00000056501	263.453	1.30713	0.161278	8.10485	5.28115e-16	8.21056e-14	Cebpb
ENSMUSG00000015947	135.688	1.86673	0.230465	8.09988	5.50142e-16	8.47798e-14	Fcgr1
ENSMUSG00000036964	289.019	1.68775	0.208462	8.09618	5.67121e-16	8.66363e-14	Trim17
ENSMUSG00000001403	34.256	2.92483	0.362507	8.06833	7.12673e-16	1.07933e-13	Ube2c
ENSMUSG00000091405	98.7557	2.29678	0.284852	8.06306	7.44073e-16	1.11725e-13	Hist2h4
ENSMUSG00000052776	121.886	4.39412	0.54579	8.05093	8.21672e-16	1.22332e-13	Oas1a
ENSMUSG00000024737	77.1963	2.98568	0.371038	8.04682	8.49698e-16	1.25441e-13	Slc15a3
ENSMUSG00000078920	87.9095	3.09856	0.386901	8.00865	1.15974e-15	1.69786e-13	Ifi47
ENSMUSG00000001930	514.899	0.935228	0.117063	7.98909	1.35941e-15	1.97373e-13	Vwf
ENSMUSG00000041313	1559.41	0.749949	0.0942568	7.95644	1.77054e-15	2.54958e-13	Slc7a1
ENSMUSG00000029605	144.922	4.62871	0.582907	7.94074	2.00986e-15	2.87067e-13	Oas1b
ENSMUSG00000044471	65.7882	2.21685	0.279446	7.933	2.13907e-15	3.00634e-13	Lncpint
ENSMUSG00000108414	217.828	1.34576	0.169625	7.93374	2.12642e-15	3.00634e-13	Snhg1
ENSMUSG00000010755	1028.4	0.624511	0.078751	7.9302	2.18801e-15	3.05071e-13	Cars
ENSMUSG00000038539	601.317	1.14822	0.145148	7.91068	2.55986e-15	3.54107e-13	Atf5
ENSMUSG00000040296	463.708	2.61548	0.331309	7.89438	2.91767e-15	4.00451e-13	Ddx58
ENSMUSG00000006519	133.591	1.94004	0.246901	7.85753	3.91779e-15	5.33548e-13	Cyba
ENSMUSG00000045932	639.771	2.19888	0.283158	7.76556	8.12884e-15	1.09852e-12	Ifit2
ENSMUSG00000035929	279.186	3.1448	0.405588	7.75368	8.92663e-15	1.19283e-12	H2-Q4
ENSMUSG00000024308	873.511	1.21836	0.157143	7.75317	8.96255e-15	1.19283e-12	Tapbp
ENSMUSG00000040354	1240.13	0.6827	0.0881082	7.74843	9.30373e-15	1.22893e-12	Mars
ENSMUSG00000037428	9028.52	0.678445	0.0881148	7.69956	1.36534e-14	1.79003e-12	Vgf
ENSMUSG00000001467	1098.28	-0.600007	0.0779675	-7.69561	1.40822e-14	1.83257e-12	Cyp51
ENSMUSG00000027078	190.369	2.0823	0.271041	7.68261	1.55882e-14	2.01363e-12	Ube2l6
ENSMUSG00000064358	1623.71	-0.986303	0.128745	-7.6609	1.84633e-14	2.36761e-12	mt-Co3
ENSMUSG00000046480	3901.14	-0.900046	0.117878	-7.63542	2.25083e-14	2.86541e-12	Scn4b
ENSMUSG00000042678	39.2148	3.56284	0.466679	7.63446	2.26777e-14	2.8662e-12	Myo15
ENSMUSG00000032128	620.275	0.779534	0.10256	7.60079	2.94335e-14	3.69349e-12	Robo3
ENSMUSG00000015340	90.2132	2.67285	0.353815	7.55435	4.20945e-14	5.2448e-12	Cybb
ENSMUSG00000054072	274.84	4.43331	0.589147	7.52497	5.2732e-14	6.52392e-12	Iigp1
ENSMUSG00000038550	284.87	0.966237	0.128602	7.51342	5.76037e-14	7.07679e-12	Ciart
ENSMUSG00000029752	2314.56	0.63905	0.0851907	7.5014	6.31389e-14	7.70294e-12	Asns
ENSMUSG00000047281	97.3154	1.63785	0.218516	7.49533	6.61339e-14	8.01269e-12	Sfn
ENSMUSG00000020437	42.4693	2.80618	0.374515	7.49284	6.73992e-14	8.11006e-12	Myo1g
ENSMUSG00000027489	720.346	-0.875028	0.116957	-7.48165	7.33943e-14	8.77137e-12	Necab3
ENSMUSG00000020142	1911.97	0.677597	0.0906132	7.4779	7.55188e-14	8.96428e-12	Slc1a4
ENSMUSG00000073490	45.6469	4.2498	0.571659	7.43416	1.05238e-13	1.24082e-11	Ifi207
ENSMUSG00000037849	29.0851	8.20634	1.10521	7.42512	1.12673e-13	1.31963e-11	Ifi206
ENSMUSG00000029471	4163.94	-0.739868	0.0997748	-7.41537	1.21282e-13	1.41104e-11	Camkk2
ENSMUSG00000063268	152.376	2.25662	0.30465	7.40726	1.28932e-13	1.49018e-11	Parp10
ENSMUSG00000086782	140.675	1.22798	0.166369	7.38103	1.57066e-13	1.80348e-11	E130102H24Rik
ENSMUSG00000092274	2498.96	0.955415	0.129803	7.3605	1.83225e-13	2.09019e-11	Neat1
ENSMUSG00000085156	66.3872	1.71694	0.233517	7.35252	1.9451e-13	2.20461e-11	Snhg15
ENSMUSG00000061232	1773.15	2.37826	0.323797	7.34492	2.0588e-13	2.31853e-11	H2-K1
ENSMUSG00000025221	2008.6	-0.76029	0.103903	-7.31731	2.52983e-13	2.83083e-11	Kcnip2
ENSMUSG00000052160	302.707	1.6884	0.231208	7.30254	2.8239e-13	3.13989e-11	Pld4
ENSMUSG00000010358	108.267	2.10132	0.289305	7.26335	3.77618e-13	4.17232e-11	Ifi35
ENSMUSG00000009585	135.454	1.84253	0.253782	7.26027	3.86311e-13	4.21535e-11	Apobec3
ENSMUSG00000020256	117.901	1.25436	0.172753	7.26098	3.84287e-13	4.21535e-11	Aldh1l2
ENSMUSG00000001739	33.661	3.94613	0.543662	7.25842	3.91627e-13	4.22092e-11	Cldn15
ENSMUSG00000007029	1216.96	0.618033	0.0851424	7.25882	3.90479e-13	4.22092e-11	Vars
ENSMUSG00000063286	99.6023	1.78539	0.246089	7.25508	4.01433e-13	4.30023e-11	Gm8995
ENSMUSG00000093688	27.8797	5.34638	0.738951	7.23509	4.65225e-13	4.95337e-11	Gm8488
ENSMUSG00000073411	2583.04	2.31656	0.320955	7.21769	5.28766e-13	5.596e-11	H2-D1
ENSMUSG00000025017	122.283	2.20925	0.307245	7.19051	6.45491e-13	6.79041e-11	Pik3ap1
ENSMUSG00000032661	37.4223	4.05359	0.565033	7.17407	7.27987e-13	7.57118e-11	Oas3
ENSMUSG00000033909	1125.85	0.610379	0.085082	7.17401	7.28329e-13	7.57118e-11	Usp36
ENSMUSG00000093507	56.4544	2.60154	0.363161	7.1636	7.85829e-13	8.12085e-11	Gm20627
ENSMUSG00000028459	48.0781	3.01467	0.422214	7.14016	9.32253e-13	9.57767e-11	Cd72
ENSMUSG00000057143	120.704	1.73258	0.242717	7.13825	9.45244e-13	9.65467e-11	Trim12c
ENSMUSG00000051359	7070.44	-0.596561	0.0836523	-7.13144	9.93257e-13	1.00864e-10	Ncald
ENSMUSG00000037851	1573.17	0.642024	0.0900712	7.12797	1.01861e-12	1.02844e-10	Iars
ENSMUSG00000022241	766.007	0.687879	0.0966201	7.11942	1.08379e-12	1.088e-10	Tars
ENSMUSG00000021668	350.023	1.07797	0.151528	7.11401	1.12722e-12	1.12517e-10	Polk
ENSMUSG00000030738	4140.16	0.568606	0.0800424	7.10381	1.21363e-12	1.20458e-10	Eif3c
ENSMUSG00000067212	709.418	1.90674	0.269296	7.08046	1.43679e-12	1.41807e-10	H2-T23
ENSMUSG00000041736	153.069	1.76879	0.250109	7.07207	1.52638e-12	1.49807e-10	Tspo
ENSMUSG00000073409	145.617	3.94712	0.559079	7.06004	1.66449e-12	1.62455e-10	H2-Q6
ENSMUSG00000025007	621.468	0.653022	0.0925745	7.05402	1.7382e-12	1.68711e-10	Aldh18a1
ENSMUSG00000044468	113.591	1.82763	0.25956	7.04127	1.90494e-12	1.82874e-10	Tent5c
ENSMUSG00000038742	141.477	1.33194	0.189156	7.04149	1.90201e-12	1.82874e-10	Angptl6
ENSMUSG00000024079	408.471	2.18409	0.310569	7.03256	2.02781e-12	1.93003e-10	Eif2ak2
ENSMUSG00000038530	6032.39	-0.719309	0.102287	-7.03224	2.03242e-12	1.93003e-10	Rgs4
ENSMUSG00000029446	401.977	0.884331	0.125809	7.02915	2.07793e-12	1.96264e-10	Psph
ENSMUSG00000089718	21.8999	4.48884	0.639046	7.02427	2.15182e-12	2.02156e-10	2310075C17Rik
ENSMUSG00000003283	89.9538	1.53551	0.219605	6.99215	2.70714e-12	2.52974e-10	Hck
ENSMUSG00000056116	556.831	1.2541	0.179748	6.97696	3.01645e-12	2.80386e-10	H2-T22
ENSMUSG00000049044	6459.64	-0.825299	0.118732	-6.95092	3.62903e-12	3.35551e-10	Rapgef4
ENSMUSG00000031604	1400.9	-0.681813	0.0981434	-6.94711	3.72834e-12	3.42929e-10	Msmo1
ENSMUSG00000021273	1291.54	-0.627293	0.090794	-6.90898	4.88168e-12	4.46674e-10	Fdft1
ENSMUSG00000005413	161.473	1.52108	0.22037	6.90238	5.11389e-12	4.63097e-10	Hmox1
ENSMUSG00000022463	4447.57	-0.57955	0.0839603	-6.90267	5.10335e-12	4.63097e-10	Srebf2
ENSMUSG00000037010	521.092	-0.739043	0.107163	-6.89646	5.33151e-12	4.80328e-10	Apln
ENSMUSG00000069302	21.4187	7.7638	1.12719	6.88774	5.66843e-12	5.05497e-10	Hist1h2ah
ENSMUSG00000062727	44.9836	7.39571	1.07365	6.88837	5.64355e-12	5.05497e-10	Hist1h2bk
ENSMUSG00000040428	109.636	1.46957	0.213883	6.87088	6.3807e-12	5.66142e-10	Plekha4
ENSMUSG00000023883	1267.59	0.595898	0.0867831	6.86652	6.57885e-12	5.8079e-10	Phf10
ENSMUSG00000032515	291.284	1.05036	0.153149	6.8584	6.96367e-12	6.11689e-10	Csrnp1
ENSMUSG00000024339	191.752	1.42856	0.208884	6.83903	7.97339e-12	6.96898e-10	Tap2
ENSMUSG00000028794	29.2819	3.03532	0.444133	6.83426	8.24288e-12	7.16886e-10	A3galt2
ENSMUSG00000102030	28.5744	5.70515	0.838252	6.80601	1.00342e-11	8.68378e-10	Gm29106
ENSMUSG00000027962	679.444	0.770328	0.113447	6.79023	1.11959e-11	9.64162e-10	Vcam1
ENSMUSG00000026395	140.672	1.93777	0.285465	6.78812	1.13603e-11	9.73548e-10	Ptprc
ENSMUSG00000110350	32.2174	6.30182	0.931106	6.7681	1.30482e-11	1.11229e-09	Gm10252
ENSMUSG00000067879	3546.14	-0.877864	0.129718	-6.76746	1.31059e-11	1.11229e-09	Vxn
ENSMUSG00000020892	205.593	1.28724	0.190464	6.75848	1.39447e-11	1.17779e-09	Aloxe3
ENSMUSG00000042406	2854.14	0.54179	0.0802568	6.7507	1.47131e-11	1.23675e-09	Atf4
ENSMUSG00000036587	21.6978	3.64258	0.539703	6.74923	1.48635e-11	1.24344e-09	Fut7
ENSMUSG00000014599	612.691	0.987962	0.146397	6.7485	1.49377e-11	1.24372e-09	Csf1
ENSMUSG00000042377	27.2579	5.03298	0.746506	6.74205	1.56172e-11	1.29417e-09	Fam83g
ENSMUSG00000068245	92.7805	3.92788	0.582668	6.7412	1.57084e-11	1.29561e-09	Phf11d
ENSMUSG00000093930	3097.48	-0.770024	0.114259	-6.73931	1.59144e-11	1.30647e-09	Hmgcs1
ENSMUSG00000024008	1382.1	-0.691834	0.102789	-6.73062	1.68947e-11	1.38049e-09	Cpne5
ENSMUSG00000096727	72.0444	2.37939	0.353713	6.7269	1.73315e-11	1.40963e-09	Psmb9
ENSMUSG00000030966	114.788	1.90793	0.283882	6.72087	1.80646e-11	1.46248e-09	Trim21
ENSMUSG00000019122	75.9477	2.60797	0.389045	6.70351	2.03465e-11	1.63967e-09	Ccl9
ENSMUSG00000041515	195.585	1.62172	0.242006	6.70116	2.06777e-11	1.65875e-09	Irf8
ENSMUSG00000058454	589.425	-0.613983	0.0916888	-6.69637	2.13657e-11	1.70615e-09	Dhcr7
ENSMUSG00000070034	41.4667	2.64966	0.395731	6.69561	2.1477e-11	1.70728e-09	Sp110
ENSMUSG00000064363	57630.1	-0.69323	0.103768	-6.68059	2.37983e-11	1.88328e-09	mt-Nd4
ENSMUSG00000056144	92.2668	2.04087	0.30606	6.66819	2.58974e-11	2.04021e-09	Trim34a
ENSMUSG00000027322	62.2487	2.56078	0.384643	6.65756	2.78416e-11	2.18358e-09	Siglec1
ENSMUSG00000030921	256.819	3.10514	0.46648	6.65654	2.8034e-11	2.1889e-09	Trim30a
ENSMUSG00000054871	1524.75	-0.758187	0.113928	-6.65497	2.8335e-11	2.20261e-09	Tmem158
ENSMUSG00000027270	1672.05	-0.710033	0.106813	-6.64744	2.98243e-11	2.30817e-09	Lamp5
ENSMUSG00000032172	1624.82	-0.63095	0.0949446	-6.64546	3.0228e-11	2.32914e-09	Olfm2
ENSMUSG00000068696	2919.92	-0.958156	0.145108	-6.60304	4.02799e-11	3.09012e-09	Gpr88
ENSMUSG00000026536	28.7451	6.15542	0.938478	6.55894	5.41931e-11	4.13941e-09	Ifi211
ENSMUSG00000020120	450.579	1.3566	0.207516	6.53732	6.26306e-11	4.76318e-09	Plek
ENSMUSG00000042828	36.4257	2.81586	0.430954	6.53403	6.40246e-11	4.8274e-09	Trim72
ENSMUSG00000020932	12512.6	2.46166	0.376711	6.53463	6.37663e-11	4.8274e-09	Gfap
ENSMUSG00000032259	575.127	-0.881563	0.135378	-6.51186	7.42246e-11	5.57256e-09	Drd2
ENSMUSG00000027500	4922.67	-0.54706	0.0840957	-6.50521	7.75859e-11	5.80012e-09	Stmn2
ENSMUSG00000078922	30.9605	3.04959	0.469861	6.49041	8.56025e-11	6.3723e-09	Tgtp1
ENSMUSG00000098112	103.905	1.58381	0.244295	6.48318	8.98082e-11	6.65718e-09	Bin2
ENSMUSG00000029777	2786.68	0.516104	0.0797152	6.47434	9.52241e-11	7.02898e-09	Gars
ENSMUSG00000028859	217.269	1.59593	0.246585	6.47212	9.66395e-11	7.10361e-09	Csf3r
ENSMUSG00000027634	6854.75	-0.550405	0.0854244	-6.44318	1.16992e-10	8.56382e-09	Ndrg3
ENSMUSG00000079363	90.0348	1.67534	0.260827	6.42319	1.33448e-10	9.72788e-09	Gbp4
ENSMUSG00000035208	137.544	2.99007	0.465561	6.42252	1.3404e-10	9.73064e-09	Slfn8
ENSMUSG00000036306	1279.98	-0.595682	0.0930194	-6.40385	1.51508e-10	1.09535e-08	Lzts1
ENSMUSG00000065537	44.641	1.9262	0.300965	6.40009	1.55289e-10	1.11808e-08	Mir132
ENSMUSG00000031328	1937.77	0.464747	0.0726418	6.39779	1.57645e-10	1.13041e-08	Flna
ENSMUSG00000029798	304.872	1.36643	0.21404	6.38398	1.72549e-10	1.22726e-08	Herc6
ENSMUSG00000100862	1090.8	-0.872591	0.136677	-6.38435	1.72128e-10	1.22726e-08	Gm10925
ENSMUSG00000060981	69.6332	2.6242	0.411955	6.37011	1.88897e-10	1.33812e-08	Hist1h4h
ENSMUSG00000025140	106.221	1.46806	0.230566	6.3672	1.92505e-10	1.35821e-08	Pycr1
ENSMUSG00000034472	2213.06	-0.650323	0.102201	-6.36316	1.97642e-10	1.38887e-08	Rasd2
ENSMUSG00000101111	702.989	-0.773011	0.121765	-6.34839	2.17582e-10	1.5229e-08	Gm28437
ENSMUSG00000025515	23.7063	3.4271	0.540368	6.34216	2.26568e-10	1.5795e-08	Muc2
ENSMUSG00000003873	582.397	0.749249	0.118286	6.33421	2.3856e-10	1.65653e-08	Bax
ENSMUSG00000033594	704.379	-0.692908	0.109411	-6.33308	2.40319e-10	1.66217e-08	Spata2l
ENSMUSG00000067455	30.338	3.13621	0.49774	6.3009	2.95921e-10	2.03872e-08	Hist1h4j
ENSMUSG00000066258	108.821	1.73265	0.275059	6.2992	2.99178e-10	2.05311e-08	Trim12a
ENSMUSG00000030789	72.6778	5.57384	0.886603	6.28674	3.24204e-10	2.2162e-08	Itgax
ENSMUSG00000052949	5215.42	-0.479307	0.0765271	-6.26323	3.77078e-10	2.56764e-08	Rnf157
ENSMUSG00000040174	194.805	0.904543	0.144479	6.26074	3.83157e-10	2.59896e-08	Alkbh3
ENSMUSG00000004266	146.899	1.57261	0.251679	6.2485	4.14408e-10	2.80013e-08	Ptpn6
ENSMUSG00000025225	100.992	1.2361	0.19828	6.23409	4.54414e-10	3.05868e-08	Nfkb2
ENSMUSG00000022014	36.5233	2.20607	0.354153	6.22914	4.68999e-10	3.1448e-08	Epsti1
ENSMUSG00000071454	867.78	-0.569736	0.0915377	-6.22406	4.84439e-10	3.23598e-08	Dtnb
ENSMUSG00000027907	77.4562	1.37977	0.22182	6.22024	4.96384e-10	3.30321e-08	S100a11
ENSMUSG00000022831	109.338	1.78368	0.287016	6.21455	5.14709e-10	3.41223e-08	Hcls1
ENSMUSG00000001123	309.027	2.20398	0.35472	6.21331	5.18814e-10	3.42651e-08	Lgals9
ENSMUSG00000060802	3445.17	2.12866	0.343337	6.19992	5.64928e-10	3.7171e-08	B2m
ENSMUSG00000069516	305.911	1.34271	0.21679	6.19358	5.88131e-10	3.85533e-08	Lyz2
ENSMUSG00000060639	154.621	2.97185	0.480414	6.18602	6.1701e-10	4.0296e-08	Hist1h4i
ENSMUSG00000061482	29.6448	3.64172	0.589518	6.17746	6.51416e-10	4.23855e-08	Hist1h4d
ENSMUSG00000079293	69.9826	4.84059	0.784028	6.17401	6.65805e-10	4.31619e-08	Clec7a
ENSMUSG00000110622	22.7422	3.2622	0.528542	6.17207	6.74011e-10	4.35332e-08	Iqcn
ENSMUSG00000112854	18.0414	3.9623	0.642487	6.16713	6.95386e-10	4.47492e-08	Gm38403
ENSMUSG00000022594	5829.64	-0.530904	0.0861311	-6.1639	7.09735e-10	4.55059e-08	Lynx1
ENSMUSG00000082292	25.3271	4.17299	0.680301	6.13403	8.56798e-10	5.47353e-08	Gm12250
ENSMUSG00000018965	14021	-0.450583	0.0734647	-6.13332	8.60616e-10	5.47801e-08	Ywhah
ENSMUSG00000041827	61.0589	6.3393	1.03395	6.13115	8.72472e-10	5.53342e-08	Oasl1
ENSMUSG00000030895	26.5965	2.64693	0.432222	6.12402	9.12431e-10	5.76604e-08	Hpx
ENSMUSG00000078921	52.0242	2.41749	0.395083	6.11893	9.42048e-10	5.93186e-08	Tgtp2
ENSMUSG00000001750	400.272	0.966073	0.158854	6.0815	1.19061e-09	7.45757e-08	Tcirg1
ENSMUSG00000024647	648.271	-0.528478	0.0869035	-6.0812	1.19284e-09	7.45757e-08	Cbln2
ENSMUSG00000052565	20.7358	3.48925	0.573972	6.07912	1.20843e-09	7.52827e-08	Hist1h1d
ENSMUSG00000032359	268.657	1.1298	0.185878	6.07821	1.2153e-09	7.54429e-08	Ctsh
ENSMUSG00000039220	1084.38	0.578098	0.095122	6.07744	1.22115e-09	7.55391e-08	Ppp1r10
ENSMUSG00000002111	124.833	1.44866	0.238607	6.07132	1.26867e-09	7.82034e-08	Spi1
ENSMUSG00000054582	41.0777	2.96325	0.490424	6.04221	1.52013e-09	9.33764e-08	Pabpc1l
ENSMUSG00000026480	96.0441	1.54536	0.255799	6.04128	1.52896e-09	9.35916e-08	Ncf2
ENSMUSG00000040435	295.068	0.955622	0.158404	6.0328	1.61141e-09	9.79562e-08	Ppp1r15a
ENSMUSG00000064370	95801.7	-0.674506	0.111797	-6.03329	1.60658e-09	9.79562e-08	mt-Cytb
ENSMUSG00000039158	143.132	1.04881	0.173918	6.03051	1.63439e-09	9.90101e-08	Akna
ENSMUSG00000042417	66.8679	1.50907	0.250583	6.02222	1.72037e-09	1.03861e-07	Ccno
ENSMUSG00000054404	310.483	1.21893	0.202602	6.01639	1.78352e-09	1.06938e-07	Slfn5
ENSMUSG00000002983	165.835	1.09113	0.181355	6.01655	1.7817e-09	1.06938e-07	Relb
ENSMUSG00000020695	287.827	1.13403	0.188784	6.00704	1.88937e-09	1.12899e-07	Mrc2
ENSMUSG00000046093	14080.6	-0.619506	0.103361	-5.99362	2.05224e-09	1.22216e-07	Hpcal4
ENSMUSG00000024397	103.572	1.41542	0.236239	5.99145	2.07978e-09	1.23438e-07	Aif1
ENSMUSG00000024300	116.48	1.66268	0.278742	5.96496	2.44701e-09	1.44744e-07	Myo1f
ENSMUSG00000034926	1725.93	-0.645117	0.108307	-5.95637	2.57897e-09	1.52009e-07	Dhcr24
ENSMUSG00000064345	55858.1	-0.685289	0.115061	-5.95586	2.58714e-09	1.52009e-07	mt-Nd2
ENSMUSG00000025647	1068.49	0.903827	0.152037	5.94479	2.76814e-09	1.62102e-07	Shisa5
ENSMUSG00000034636	3756.73	-0.596934	0.100579	-5.93497	2.93899e-09	1.71536e-07	Zyg11b
ENSMUSG00000058258	324.486	-1.10737	0.186796	-5.92821	3.06261e-09	1.78159e-07	Idi1
ENSMUSG00000061991	14.3597	7.18771	1.21267	5.92716	3.08224e-09	1.78709e-07	Hist1h2af
ENSMUSG00000020326	2083.39	0.878981	0.148313	5.92653	3.09406e-09	1.78804e-07	Ccng1
ENSMUSG00000044628	1825.69	-0.525831	0.0890788	-5.90299	3.5697e-09	2.05615e-07	Rnf208
ENSMUSG00000035033	1415.32	-0.699671	0.118673	-5.89581	3.72853e-09	2.14061e-07	Tbr1
ENSMUSG00000041168	1778.62	0.483557	0.0823075	5.87501	4.22829e-09	2.41963e-07	Lonp1
ENSMUSG00000025591	341.204	1.02793	0.175079	5.87122	4.32597e-09	2.46749e-07	Tma16
ENSMUSG00000029417	18.033	5.44977	0.929027	5.86611	4.46146e-09	2.53653e-07	Cxcl9
ENSMUSG00000040703	129.731	-1.03631	0.176942	-5.85681	4.71839e-09	2.67396e-07	Cyp2s1
ENSMUSG00000048240	3319.82	-0.677751	0.115814	-5.85208	4.85473e-09	2.74237e-07	Gng7
ENSMUSG00000043439	1011.22	-0.719795	0.123388	-5.83361	5.42424e-09	3.05427e-07	Epop
ENSMUSG00000020075	664.978	0.572889	0.098462	5.81838	5.94214e-09	3.33519e-07	Ddx21
ENSMUSG00000007944	1405.1	-0.876115	0.150651	-5.81552	6.04474e-09	3.38197e-07	Ttc9b
ENSMUSG00000030798	120.341	1.3542	0.232974	5.81265	6.14899e-09	3.42938e-07	Cd37
ENSMUSG00000068606	9.76329	6.6329	1.14269	5.80465	6.45001e-09	3.58217e-07	Gm4841
ENSMUSG00000045294	1201.08	-0.453204	0.0780808	-5.8043	6.46373e-09	3.58217e-07	Insig1
ENSMUSG00000068129	117.57	5.93842	1.02325	5.80351	6.49416e-09	3.58772e-07	Cst7
ENSMUSG00000001119	916.512	-0.800379	0.137927	-5.80291	6.51738e-09	3.58926e-07	Col6a1
ENSMUSG00000029449	627.82	-0.581928	0.100342	-5.79945	6.6531e-09	3.65255e-07	Rhof
ENSMUSG00000036781	213.307	0.744319	0.128511	5.79186	6.9612e-09	3.80979e-07	Rps27l
ENSMUSG00000000982	19.1595	4.50255	0.777969	5.78757	7.1413e-09	3.88944e-07	Ccl3
ENSMUSG00000039470	1065.17	-0.577922	0.0998598	-5.78734	7.151e-09	3.88944e-07	Zdhhc2
ENSMUSG00000041801	790.12	0.807677	0.139913	5.77269	7.80176e-09	4.21727e-07	Phlda3
ENSMUSG00000020038	562.789	0.678209	0.117476	5.77315	7.78028e-09	4.21727e-07	Cry1
ENSMUSG00000021670	1926.07	-0.518322	0.089819	-5.77074	7.89246e-09	4.25321e-07	Hmgcr
ENSMUSG00000097736	42.6566	1.951	0.338449	5.76454	8.18819e-09	4.39909e-07	9530059O14Rik
ENSMUSG00000004707	32.7371	3.29561	0.573089	5.75061	8.8924e-09	4.76286e-07	Ly9
ENSMUSG00000116305	108.961	1.25997	0.219394	5.74295	9.30396e-09	4.96814e-07	Lncppara
ENSMUSG00000067736	147.725	-1.14588	0.199638	-5.7398	9.47911e-09	5.04634e-07	Gm10222
ENSMUSG00000052142	92.7596	1.54882	0.270133	5.73357	9.83401e-09	5.21945e-07	Rasal3
ENSMUSG00000002668	51.7478	1.66391	0.29035	5.73069	1.00024e-08	5.29284e-07	Dennd1c
ENSMUSG00000026615	2146.97	0.559906	0.0978779	5.72045	1.06241e-08	5.60495e-07	Eprs
ENSMUSG00000097743	162.422	1.12774	0.197346	5.71453	1.10009e-08	5.78632e-07	Gm16973
ENSMUSG00000019647	1301.28	0.931343	0.163001	5.71373	1.10525e-08	5.79614e-07	Sema6a
ENSMUSG00000025738	14587.8	-0.48038	0.084113	-5.71113	1.12229e-08	5.86798e-07	Fbxl16
ENSMUSG00000028926	3329.17	-0.455255	0.0797446	-5.70892	1.13698e-08	5.92714e-07	Cdk14
ENSMUSG00000003469	6819.66	-0.615355	0.107827	-5.70687	1.1507e-08	5.98094e-07	Phyhip
ENSMUSG00000035258	225.074	-0.926138	0.162381	-5.70348	1.17389e-08	6.08346e-07	Abi3bp
ENSMUSG00000030560	272.307	1.29476	0.227216	5.69836	1.20966e-08	6.23206e-07	Ctsc
ENSMUSG00000051111	1467.73	-0.456256	0.080067	-5.69842	1.2092e-08	6.23206e-07	Sv2c
ENSMUSG00000047407	39.2522	1.97946	0.347536	5.69569	1.22874e-08	6.31066e-07	Tgif1
ENSMUSG00000038235	168.13	1.01023	0.177382	5.69522	1.2321e-08	6.31066e-07	F11r
ENSMUSG00000029322	15.6504	3.61941	0.635699	5.69359	1.24398e-08	6.35299e-07	Plac8
ENSMUSG00000027639	521.064	0.766706	0.134682	5.6927	1.25045e-08	6.36751e-07	Samhd1
ENSMUSG00000018548	6190.05	-0.543698	0.0955559	-5.68984	1.27158e-08	6.45639e-07	Trim37
ENSMUSG00000018774	216.224	1.29761	0.228322	5.68323	1.32173e-08	6.6917e-07	Cd68
ENSMUSG00000072235	8004.53	-0.439179	0.0772891	-5.68229	1.32906e-08	6.70945e-07	Tuba1a
ENSMUSG00000049502	244.56	2.02032	0.356014	5.67483	1.38829e-08	6.97005e-07	Dtx3l
ENSMUSG00000022216	626.469	0.711357	0.125354	5.67479	1.38861e-08	6.97005e-07	Psme1
ENSMUSG00000038642	1922.84	1.84653	0.325557	5.6719	1.41221e-08	7.06827e-07	Ctss
ENSMUSG00000091971	225.343	1.29958	0.229314	5.66727	1.4509e-08	7.24132e-07	Hspa1a
ENSMUSG00000046922	175.053	-1.22438	0.216606	-5.65256	1.58075e-08	7.86702e-07	Gpr6
ENSMUSG00000079197	243.404	1.0434	0.184741	5.64789	1.62426e-08	8.06073e-07	Psme2
ENSMUSG00000037217	10517	-0.452155	0.0800667	-5.64723	1.63053e-08	8.06908e-07	Syn1
ENSMUSG00000053550	2693.56	-0.547256	0.0969607	-5.6441	1.66051e-08	8.19434e-07	Shisa7
ENSMUSG00000016349	17081.5	-0.386139	0.0685632	-5.63188	1.7826e-08	8.76689e-07	Eef1a2
ENSMUSG00000036242	612.31	-0.542001	0.0962445	-5.6315	1.78651e-08	8.76689e-07	Armh4
ENSMUSG00000057506	465.417	0.858687	0.152531	5.62961	1.8062e-08	8.8388e-07	Bloc1s2
ENSMUSG00000042354	558.69	0.586046	0.104222	5.62305	1.87616e-08	9.15565e-07	Gnl3
ENSMUSG00000034667	2398.27	0.505217	0.0898871	5.62057	1.90324e-08	9.26209e-07	Xpot
ENSMUSG00000049401	774.705	0.651756	0.116295	5.60434	2.09053e-08	1.01454e-06	Ogfr
ENSMUSG00000099517	67.3393	5.47481	0.977354	5.60167	2.12299e-08	1.02746e-06	Hist1h3g
ENSMUSG00000028427	13.1208	6.32427	1.12946	5.59939	2.15112e-08	1.03821e-06	Aqp7
ENSMUSG00000021066	2138.54	-0.494046	0.0883666	-5.59087	2.25938e-08	1.08748e-06	Atl1
ENSMUSG00000020423	384.608	0.94896	0.17	5.58212	2.37607e-08	1.14052e-06	Btg2
ENSMUSG00000010663	4148.56	-0.322591	0.0578386	-5.57743	2.44094e-08	1.16846e-06	Fads1
ENSMUSG00000064351	243140	-0.596013	0.106912	-5.57481	2.47793e-08	1.18294e-06	mt-Co1
ENSMUSG00000035385	18.2766	5.02966	0.90249	5.57309	2.50257e-08	1.19147e-06	Ccl2
ENSMUSG00000008601	14.0792	4.64716	0.834084	5.57157	2.52448e-08	1.19865e-06	Rab25
ENSMUSG00000024617	33043.9	-0.649235	0.116565	-5.56971	2.55167e-08	1.2083e-06	Camk2a
ENSMUSG00000021130	2636.45	-0.339089	0.0609021	-5.56778	2.58012e-08	1.21848e-06	Galnt16
ENSMUSG00000018927	65.4423	2.38061	0.427634	5.56694	2.59259e-08	1.22109e-06	Ccl6
ENSMUSG00000047735	293.422	2.07501	0.372957	5.56367	2.64156e-08	1.2374e-06	Samd9l
ENSMUSG00000021573	8398.24	-0.349087	0.0627438	-5.56369	2.64122e-08	1.2374e-06	Tppp
ENSMUSG00000100131	457.718	-1.00409	0.180486	-5.56322	2.64836e-08	1.2374e-06	Gm28439
ENSMUSG00000071656	48.8258	1.82874	0.329013	5.55825	2.72486e-08	1.26641e-06	Lrrn4cl
ENSMUSG00000030772	3824.85	-0.454679	0.0818	-5.55842	2.72225e-08	1.26641e-06	Dkk3
ENSMUSG00000000632	3768.86	-0.602756	0.108528	-5.55394	2.79308e-08	1.29469e-06	Sez6
ENSMUSG00000020178	685.86	-0.999926	0.180475	-5.54051	3.01585e-08	1.39428e-06	Adora2a
ENSMUSG00000022598	12.6789	6.27408	1.13314	5.53691	3.07863e-08	1.41956e-06	Psca
ENSMUSG00000040495	367.464	-0.691723	0.124986	-5.53442	3.1226e-08	1.43607e-06	Chrm4
ENSMUSG00000018920	66.5114	1.69483	0.306314	5.53297	3.14853e-08	1.44421e-06	Cxcl16
ENSMUSG00000067924	1167.03	-0.444491	0.0803587	-5.53133	3.17807e-08	1.45397e-06	Rtl8b
ENSMUSG00000030786	146.797	1.29507	0.234316	5.52702	3.25715e-08	1.48628e-06	Itgam
ENSMUSG00000036057	1700.3	0.429754	0.0777752	5.5256	3.28369e-08	1.4945e-06	Ptpn23
ENSMUSG00000079685	18.5697	3.89216	0.704479	5.52487	3.29731e-08	1.49683e-06	Ulbp1
ENSMUSG00000023047	55.6528	2.0025	0.362564	5.52315	3.32967e-08	1.50762e-06	Amhr2
ENSMUSG00000037579	2201.77	-0.71152	0.129052	-5.51345	3.51859e-08	1.58907e-06	Kcnh3
ENSMUSG00000069895	995.018	0.419366	0.0760738	5.51263	3.53515e-08	1.59223e-06	Atxn1l
ENSMUSG00000058254	15477	-0.346977	0.0629471	-5.5122	3.54372e-08	1.59223e-06	Tspan7
ENSMUSG00000036908	404.135	1.1859	0.215193	5.51086	3.57075e-08	1.60028e-06	Unc93b1
ENSMUSG00000028465	1291.8	0.426253	0.0773903	5.50784	3.63268e-08	1.62261e-06	Tln1
ENSMUSG00000051391	20918.5	-0.31177	0.0566079	-5.50753	3.63905e-08	1.62261e-06	Ywhag
ENSMUSG00000024451	264.415	0.62301	0.113377	5.49504	3.90621e-08	1.73732e-06	Arap3
ENSMUSG00000020538	1776.11	0.6729	0.122493	5.49339	3.94281e-08	1.74917e-06	Srebf1
ENSMUSG00000042182	2605.43	-0.502025	0.0915136	-5.4858	4.11607e-08	1.82144e-06	Bend6
ENSMUSG00000006711	704.802	-0.541323	0.0987102	-5.48396	4.15913e-08	1.83587e-06	D130043K22Rik
ENSMUSG00000037731	48.9249	1.73245	0.316214	5.47872	4.28421e-08	1.88634e-06	Themis2
ENSMUSG00000035936	1587.58	-0.423299	0.0773003	-5.47603	4.34964e-08	1.9056e-06	Aldh5a1
ENSMUSG00000054459	9407.71	-0.462903	0.0845325	-5.47603	4.34962e-08	1.9056e-06	Vsnl1
ENSMUSG00000006435	3210.32	-0.568709	0.104158	-5.46007	4.75949e-08	2.07997e-06	Neurl1a
ENSMUSG00000058163	23.6471	3.77781	0.692273	5.45711	4.83956e-08	2.10812e-06	Gm5431
ENSMUSG00000002808	2146.23	-0.359365	0.0658563	-5.4568	4.8479e-08	2.10812e-06	Epdr1
ENSMUSG00000056296	1988.95	-0.407985	0.0747871	-5.45528	4.88963e-08	2.12101e-06	Synpr
ENSMUSG00000023393	25.0928	2.26456	0.415208	5.45403	4.92402e-08	2.13067e-06	Slc17a9
ENSMUSG00000036095	2843.34	-0.627267	0.115027	-5.45322	4.94671e-08	2.13523e-06	Dgkb
ENSMUSG00000007656	3797.18	-0.612409	0.112346	-5.45109	5.00623e-08	2.15562e-06	Arpp19
ENSMUSG00000025650	119.789	1.20296	0.220824	5.44759	5.10572e-08	2.19309e-06	Col7a1
ENSMUSG00000053560	273.928	0.930439	0.170846	5.44607	5.14957e-08	2.20653e-06	Ier2
ENSMUSG00000022148	99.4294	1.56789	0.287975	5.44453	5.19414e-08	2.22021e-06	Fyb
ENSMUSG00000044350	139.349	1.23292	0.226683	5.43897	5.35904e-08	2.28514e-06	Lacc1
ENSMUSG00000024493	915.457	0.502948	0.0926508	5.42843	5.68533e-08	2.41746e-06	Lars
ENSMUSG00000078671	1372.16	0.47268	0.0870808	5.42806	5.69688e-08	2.41746e-06	Chd2
ENSMUSG00000039997	64.8515	1.61517	0.297595	5.42742	5.71755e-08	2.42029e-06	Ifi203
ENSMUSG00000027327	678.072	-0.62999	0.116085	-5.42699	5.73112e-08	2.42029e-06	1700037H04Rik
ENSMUSG00000057101	1204.26	0.44513	0.082134	5.41956	5.97475e-08	2.51713e-06	Zfp180
ENSMUSG00000063524	12039.3	-0.353915	0.0653893	-5.41243	6.21746e-08	2.61312e-06	Eno1
ENSMUSG00000071715	27.7222	2.47746	0.458076	5.4084	6.35898e-08	2.65994e-06	Ncf4
ENSMUSG00000064341	81634	-0.593576	0.109751	-5.4084	6.35915e-08	2.65994e-06	mt-Nd1
ENSMUSG00000055413	22.7069	3.38795	0.626571	5.40714	6.40395e-08	2.67232e-06	H2-Q5
ENSMUSG00000097194	15.7162	5.30941	0.98233	5.40492	6.48379e-08	2.69922e-06	9330175E14Rik
ENSMUSG00000017167	4368.01	-0.487637	0.0902779	-5.40151	6.6081e-08	2.74447e-06	Cntnap1
ENSMUSG00000026946	88.0745	1.5781	0.292452	5.3961	6.81034e-08	2.82179e-06	Nmi
ENSMUSG00000024736	1966.59	-0.485432	0.0900534	-5.39049	7.0264e-08	2.90447e-06	Tmem132a
ENSMUSG00000027490	165.956	-0.908459	0.168644	-5.38686	7.1701e-08	2.95691e-06	E2f1
ENSMUSG00000041670	3274.49	-0.61786	0.114725	-5.38558	7.22128e-08	2.97104e-06	Rims1
ENSMUSG00000104713	101.605	3.51685	0.653859	5.37861	7.50623e-08	3.08106e-06	Gbp6
ENSMUSG00000094910	2360.86	-0.540949	0.100598	-5.37732	7.56029e-08	3.09602e-06	D430019H16Rik
ENSMUSG00000035778	130.63	1.46192	0.271954	5.37562	7.63204e-08	3.11813e-06	Ggta1
ENSMUSG00000031207	808.645	0.917641	0.170905	5.36929	7.9047e-08	3.22204e-06	Msn
ENSMUSG00000022858	1486.4	0.486048	0.0906376	5.36255	8.20554e-08	3.32921e-06	Tra2b
ENSMUSG00000032193	437.383	-0.731018	0.136315	-5.3627	8.19877e-08	3.32921e-06	Ldlr
ENSMUSG00000030785	146.126	0.881734	0.164614	5.35636	8.49132e-08	3.43722e-06	Cox6a2
ENSMUSG00000024378	510.446	-0.745804	0.139258	-5.35557	8.52882e-08	3.44447e-06	Stard4
ENSMUSG00000020130	845.395	0.634394	0.118512	5.35298	8.65182e-08	3.48613e-06	Tbc1d15
ENSMUSG00000033220	68.1057	1.64408	0.307176	5.35225	8.6867e-08	3.48667e-06	Rac2
ENSMUSG00000070304	4681.05	-0.44113	0.0824215	-5.35212	8.69287e-08	3.48667e-06	Scn2b
ENSMUSG00000018899	168.641	0.880535	0.164668	5.34734	8.92583e-08	3.57196e-06	Irf1
ENSMUSG00000026167	152.312	-0.820992	0.153767	-5.33919	9.33618e-08	3.72768e-06	Wnt10a
ENSMUSG00000035042	50.7649	5.73281	1.07506	5.33256	9.68402e-08	3.85077e-06	Ccl5
ENSMUSG00000036887	1334.86	1.85274	0.347445	5.33248	9.68829e-08	3.85077e-06	C1qa
ENSMUSG00000020184	1249.52	0.741958	0.139385	5.3231	1.02015e-07	4.04559e-06	Mdm2
ENSMUSG00000045917	345.784	0.553878	0.104102	5.32052	1.03472e-07	4.09412e-06	Tmem268
ENSMUSG00000062098	3364.33	-0.485643	0.0913193	-5.31808	1.0487e-07	4.14014e-06	Btbd3
ENSMUSG00000020447	80.9242	1.87442	0.352736	5.31395	1.07276e-07	4.22563e-06	Npc1l1
ENSMUSG00000034947	49.3521	1.83458	0.345526	5.30953	1.09906e-07	4.31954e-06	Tmem106a
ENSMUSG00000110697	17.3442	3.0552	0.575509	5.30869	1.10413e-07	4.32977e-06	Gm31718
ENSMUSG00000034154	794.476	0.542471	0.102198	5.30804	1.10812e-07	4.33573e-06	Ino80
ENSMUSG00000019961	830.483	0.485593	0.0915384	5.3048	1.12797e-07	4.4036e-06	Tmpo
ENSMUSG00000029062	1301.69	0.441536	0.0832899	5.3012	1.15042e-07	4.48129e-06	Cdk11b
ENSMUSG00000026103	5945.48	-0.57675	0.108901	-5.29611	1.18296e-07	4.59786e-06	Gls
ENSMUSG00000035596	2895.13	-0.314053	0.0593155	-5.29462	1.19262e-07	4.62517e-06	Mboat7
ENSMUSG00000039706	603.606	-0.54551	0.103041	-5.29409	1.19609e-07	4.62841e-06	Ldb2
ENSMUSG00000008167	360.04	0.909448	0.171922	5.28988	1.22399e-07	4.72595e-06	Fbxw9
ENSMUSG00000054648	394.905	0.554513	0.105072	5.27746	1.3099e-07	5.04655e-06	Zfp869
ENSMUSG00000009394	8755.73	-0.451873	0.0856631	-5.27499	1.3276e-07	5.10358e-06	Syn2
ENSMUSG00000055943	2569.83	0.406878	0.0771426	5.27437	1.33212e-07	5.10976e-06	Emc7
ENSMUSG00000028560	615.571	0.505514	0.0958516	5.27392	1.33538e-07	5.11111e-06	Usp1
ENSMUSG00000032988	56.3271	1.28273	0.243524	5.26739	1.38377e-07	5.28479e-06	Slc16a8
ENSMUSG00000027196	24.2004	2.1476	0.408035	5.26326	1.4152e-07	5.3931e-06	Alkbh3os1
ENSMUSG00000058420	757.54	-0.536674	0.101998	-5.26159	1.42815e-07	5.43068e-06	Syt17
ENSMUSG00000000308	2730.73	-0.373749	0.0710994	-5.25671	1.46659e-07	5.56482e-06	Ckmt1
ENSMUSG00000040751	46.2677	1.784	0.339497	5.25484	1.48151e-07	5.60932e-06	Lat2
ENSMUSG00000021701	3368.36	0.412696	0.0786676	5.24607	1.55378e-07	5.87028e-06	Plk2
ENSMUSG00000090877	298.912	1.06126	0.202673	5.23634	1.63795e-07	6.17501e-06	Hspa1b
ENSMUSG00000010797	42.0432	-1.74358	0.33332	-5.23095	1.68641e-07	6.34407e-06	Wnt2
ENSMUSG00000026177	112.995	1.56012	0.298707	5.22292	1.76122e-07	6.61135e-06	Slc11a1
ENSMUSG00000048644	5003.48	-0.5568	0.106827	-5.21216	1.86652e-07	6.99169e-06	Ctxn1
ENSMUSG00000043079	3137.04	-0.570307	0.109477	-5.20938	1.89477e-07	7.08241e-06	Synpo
ENSMUSG00000042834	1066.65	-0.555824	0.106785	-5.20508	1.93909e-07	7.23268e-06	Nrep
ENSMUSG00000036896	1137.36	1.55313	0.298553	5.2022	1.96944e-07	7.33031e-06	C1qc
ENSMUSG00000036225	1199.38	-0.494213	0.0950248	-5.20089	1.98342e-07	7.36674e-06	Kctd1
ENSMUSG00000030124	316.877	2.47311	0.475826	5.19751	2.01973e-07	7.48577e-06	Lag3
ENSMUSG00000040945	2721.69	0.421191	0.0810582	5.19616	2.03452e-07	7.52473e-06	Rcc2
ENSMUSG00000072214	2191.76	-0.394795	0.0759847	-5.19571	2.03935e-07	7.52673e-06	Septin5
ENSMUSG00000027457	5479.5	-0.444943	0.0856896	-5.1925	2.07493e-07	7.64202e-06	Snph
ENSMUSG00000036882	3080.32	-0.521191	0.100407	-5.1908	2.09396e-07	7.69597e-06	Arhgap33
ENSMUSG00000029771	112.903	1.14965	0.221521	5.1898	2.10519e-07	7.72107e-06	Irf5
ENSMUSG00000034685	1882.81	-0.438736	0.0845494	-5.1891	2.11309e-07	7.73391e-06	Fam171a2
ENSMUSG00000029816	91.727	1.51481	0.29196	5.18842	2.12083e-07	7.74612e-06	Gpnmb
ENSMUSG00000046321	541.125	-0.788743	0.152167	-5.18341	2.17868e-07	7.94088e-06	Hs3st2
ENSMUSG00000031770	1475.58	0.566482	0.109335	5.18115	2.20526e-07	8.02111e-06	Herpud1
ENSMUSG00000020374	369.252	-0.60173	0.116268	-5.17537	2.27459e-07	8.2562e-06	Rasgef1c
ENSMUSG00000026628	120.939	2.61821	0.506084	5.17346	2.29795e-07	8.30828e-06	Atf3
ENSMUSG00000042608	1047.59	0.634519	0.12265	5.17343	2.2984e-07	8.30828e-06	Stk40
ENSMUSG00000078945	55.7212	1.61534	0.312463	5.16969	2.34487e-07	8.45888e-06	Naip2
ENSMUSG00000059089	19.7585	3.48077	0.673366	5.16921	2.35091e-07	8.46329e-06	Fcgr4
ENSMUSG00000026355	217.784	0.964656	0.186751	5.16546	2.39845e-07	8.61678e-06	Mcm6
ENSMUSG00000027472	638.862	0.626821	0.12147	5.1603	2.46561e-07	8.83996e-06	Pdrg1
ENSMUSG00000037447	320.755	0.706971	0.137051	5.15845	2.48997e-07	8.90912e-06	Arid5a
ENSMUSG00000061451	4304.79	-0.348983	0.067663	-5.15766	2.50058e-07	8.9289e-06	Tmem151a
ENSMUSG00000040794	3468.1	-0.534583	0.1037	-5.15511	2.53483e-07	9.03285e-06	C1qtnf4
ENSMUSG00000027827	1888.41	-0.53088	0.103061	-5.15111	2.58945e-07	9.20881e-06	Kcnab1
ENSMUSG00000006362	651.995	-0.564466	0.109599	-5.15029	2.6009e-07	9.23084e-06	Cbfa2t3
ENSMUSG00000033644	51.8906	2.00476	0.389372	5.14869	2.62314e-07	9.29101e-06	Piwil2
ENSMUSG00000047180	43.0245	2.02472	0.394108	5.13749	2.78439e-07	9.84227e-06	Neurl3
ENSMUSG00000032372	71.0618	1.4967	0.291389	5.13644	2.79998e-07	9.8775e-06	Plscr2
ENSMUSG00000020674	1403.27	-0.532072	0.103627	-5.1345	2.82893e-07	9.95964e-06	Pxdn
ENSMUSG00000030592	423.489	-0.781915	0.1523	-5.13405	2.83567e-07	9.96339e-06	Ryr1
ENSMUSG00000021423	304.751	2.0398	0.397374	5.13319	2.84873e-07	9.98932e-06	Ly86
ENSMUSG00000022756	918.776	-0.571471	0.111338	-5.13274	2.8556e-07	9.99345e-06	Slc7a4
ENSMUSG00000027419	5249.11	-0.406145	0.0791947	-5.12843	2.92162e-07	1.02042e-05	Pcsk2
ENSMUSG00000053398	1541.81	0.444142	0.0866372	5.12646	2.95246e-07	1.02711e-05	Phgdh
ENSMUSG00000034997	544.791	-0.667497	0.130202	-5.12663	2.94969e-07	1.02711e-05	Htr2a
ENSMUSG00000030341	316.673	1.0496	0.204937	5.12159	3.02974e-07	1.05191e-05	Tnfrsf1a
ENSMUSG00000042489	43.3335	-1.38149	0.269832	-5.11982	3.0582e-07	1.05969e-05	Clspn
ENSMUSG00000053158	112.463	0.970765	0.189757	5.11584	3.1235e-07	1.08019e-05	Fes
ENSMUSG00000071658	2492.84	-0.318709	0.0623181	-5.11422	3.15033e-07	1.08733e-05	Gng3
ENSMUSG00000045318	512.209	-0.607683	0.118897	-5.111	3.20466e-07	1.10391e-05	Adra2c
ENSMUSG00000085385	281.22	0.662777	0.129705	5.10987	3.22381e-07	1.10834e-05	Snhg17
ENSMUSG00000073902	16.6982	2.98388	0.585293	5.0981	3.43081e-07	1.1772e-05	Gm1966
ENSMUSG00000051457	14.5135	3.36449	0.661033	5.08975	3.58541e-07	1.22785e-05	Spn
ENSMUSG00000071068	26.3378	2.97819	0.58548	5.08676	3.6423e-07	1.2449e-05	Treml2
ENSMUSG00000035394	21.848	2.25923	0.444666	5.08074	3.75961e-07	1.28002e-05	Cfap53
ENSMUSG00000042700	6294.05	-0.505383	0.0994685	-5.08084	3.75773e-07	1.28002e-05	Sipa1l1
ENSMUSG00000058638	364.967	0.666254	0.13118	5.07892	3.79594e-07	1.28838e-05	Zfp110
ENSMUSG00000039953	21960.9	-0.397183	0.0782046	-5.07877	3.79884e-07	1.28838e-05	Clstn1
ENSMUSG00000052374	355.517	-0.703048	0.138574	-5.07344	3.90679e-07	1.32244e-05	Actn2
ENSMUSG00000026571	1256.02	-0.520608	0.102643	-5.07203	3.93585e-07	1.32971e-05	Dcaf6
ENSMUSG00000056158	1579.16	-0.501953	0.0990739	-5.06645	4.05302e-07	1.36667e-05	Car10
ENSMUSG00000029405	2554.51	-0.380188	0.0750529	-5.0656	4.07125e-07	1.37019e-05	G3bp2
ENSMUSG00000046447	29704.2	-0.562042	0.111017	-5.06264	4.13479e-07	1.38891e-05	Camk2n1
ENSMUSG00000043008	42.1862	1.67224	0.330585	5.05842	4.22744e-07	1.41732e-05	Klhl6
ENSMUSG00000052658	23.8011	2.4078	0.476579	5.05225	4.36629e-07	1.46108e-05	5830454E08Rik
ENSMUSG00000022840	5906.75	-0.534594	0.105967	-5.04491	4.53745e-07	1.51547e-05	Adcy5
ENSMUSG00000016559	3552.58	0.551369	0.109373	5.04118	4.62668e-07	1.54234e-05	H3f3b
ENSMUSG00000042622	77.2232	1.31923	0.261726	5.0405	4.64315e-07	1.54271e-05	Maff
ENSMUSG00000021057	1503.92	-0.692804	0.13745	-5.04041	4.64534e-07	1.54271e-05	Akap5
ENSMUSG00000027995	107.712	2.87674	0.571105	5.03715	4.7252e-07	1.56627e-05	Tlr2
ENSMUSG00000028222	2173.86	-0.485017	0.0963572	-5.03353	4.81531e-07	1.59313e-05	Calb1
ENSMUSG00000047842	4716.1	-0.572822	0.113915	-5.02851	4.94318e-07	1.63236e-05	Diras2
ENSMUSG00000071847	626.1	0.576395	0.114646	5.0276	4.96645e-07	1.63521e-05	Apcdd1
ENSMUSG00000001415	2073.64	0.326129	0.0648696	5.02745	4.97041e-07	1.63521e-05	Smg5
ENSMUSG00000058248	1380.85	-0.43414	0.0863641	-5.02685	4.98594e-07	1.63725e-05	Kcnh1
ENSMUSG00000020434	21.3098	2.39358	0.476633	5.02186	5.11729e-07	1.67537e-05	4921536K21Rik
ENSMUSG00000020869	2073.94	0.367291	0.0731405	5.02172	5.12108e-07	1.67537e-05	Lrrc59
ENSMUSG00000075040	261.587	0.732201	0.14595	5.01681	5.25369e-07	1.71555e-05	Zfp408
ENSMUSG00000048310	240.042	0.685192	0.136672	5.0134	5.34768e-07	1.74301e-05	Pskh1
ENSMUSG00000025592	37.8507	1.56265	0.311982	5.00879	5.47723e-07	1.78193e-05	Dach2
ENSMUSG00000018930	13.4933	5.62279	1.12294	5.0072	5.52273e-07	1.79341e-05	Ccl4
ENSMUSG00000028528	5411.82	-0.398697	0.0796692	-5.0044	5.60352e-07	1.81629e-05	Dnajc6
ENSMUSG00000031513	1873.93	0.383977	0.0768066	4.99926	5.75493e-07	1.86027e-05	Leprotl1
ENSMUSG00000040118	3569.84	-0.632538	0.126531	-4.99908	5.76039e-07	1.86027e-05	Cacna2d1
ENSMUSG00000002032	975.586	-0.420462	0.0841994	-4.99365	5.925e-07	1.90991e-05	Tmem25
ENSMUSG00000086841	275.687	1.07957	0.216206	4.99325	5.93703e-07	1.91029e-05	2410006H16Rik
ENSMUSG00000044827	25.4716	2.29661	0.4604	4.98828	6.09184e-07	1.95652e-05	Tlr1
ENSMUSG00000041708	2617.55	-0.440928	0.088533	-4.98038	6.34585e-07	2.03438e-05	Mpped1
ENSMUSG00000002227	278.559	0.574461	0.115362	4.97963	6.37048e-07	2.03855e-05	Mov10
ENSMUSG00000028542	1012.2	0.454688	0.0913246	4.97882	6.39745e-07	2.04346e-05	Slc6a9
ENSMUSG00000035852	24.0465	2.19967	0.441895	4.97781	6.43065e-07	2.05034e-05	Misp
ENSMUSG00000028337	564.376	-0.455226	0.0914835	-4.97605	6.4895e-07	2.06535e-05	Coro2a
ENSMUSG00000028889	340.546	0.562146	0.11302	4.97387	6.5631e-07	2.085e-05	Yrdc
ENSMUSG00000003363	7901.69	-0.409882	0.0824441	-4.97164	6.63893e-07	2.10528e-05	Pld3
ENSMUSG00000116617	18.0249	3.07646	0.619077	4.96942	6.7152e-07	2.12563e-05	AC130815.1
ENSMUSG00000036995	153.778	1.04623	0.210646	4.96676	6.80791e-07	2.14704e-05	Asap3
ENSMUSG00000026956	275.3	0.643271	0.129524	4.96643	6.8195e-07	2.14704e-05	Uap1l1
ENSMUSG00000029657	5683.19	-0.371721	0.0748449	-4.96655	6.81533e-07	2.14704e-05	Hsph1
ENSMUSG00000059173	2208.94	-0.65899	0.132755	-4.96397	6.9067e-07	2.17061e-05	Pde1a
ENSMUSG00000036905	1341.95	1.58026	0.318503	4.96152	6.99446e-07	2.19426e-05	C1qb
ENSMUSG00000039981	17.7793	3.70743	0.747355	4.96073	7.02302e-07	2.1993e-05	Zc3h12d
ENSMUSG00000090667	38.1918	-1.55747	0.314007	-4.95999	7.04979e-07	2.20375e-05	Gm765
ENSMUSG00000040712	4849.5	-0.419743	0.0847376	-4.95345	7.29088e-07	2.27103e-05	Camta2
ENSMUSG00000030376	4587.03	-0.578051	0.11669	-4.95374	7.2799e-07	2.27103e-05	Slc8a2
ENSMUSG00000002341	3353.36	-0.455737	0.0920405	-4.95148	7.36501e-07	2.29006e-05	Ncan
ENSMUSG00000026548	34.3249	2.64168	0.534019	4.94679	7.54488e-07	2.34185e-05	Slamf9
ENSMUSG00000000958	75.484	1.30538	0.263915	4.94623	7.56655e-07	2.34443e-05	Slc7a7
ENSMUSG00000028599	132.334	1.22554	0.247853	4.94464	7.62863e-07	2.3595e-05	Tnfrsf1b
ENSMUSG00000063234	27.1325	2.61559	0.529094	4.94354	7.67179e-07	2.36868e-05	Gpr84
ENSMUSG00000036687	20.0732	3.02159	0.611453	4.94166	7.74595e-07	2.38738e-05	Tmem184a
ENSMUSG00000046329	5521.93	-0.445732	0.0903488	-4.93345	8.07887e-07	2.48563e-05	Slc25a23
ENSMUSG00000056737	70.0523	1.54213	0.313001	4.92692	8.35366e-07	2.56441e-05	Capg
ENSMUSG00000079018	842.532	0.546956	0.111019	4.92667	8.36412e-07	2.56441e-05	Ly6c1
ENSMUSG00000015133	149.539	0.840015	0.170543	4.92553	8.41311e-07	2.57494e-05	Lrrk1
ENSMUSG00000064145	1120.32	0.459725	0.0933537	4.92456	8.45523e-07	2.58333e-05	Arih2
ENSMUSG00000018476	1034.94	0.516088	0.104879	4.9208	8.61932e-07	2.62889e-05	Kdm6b
ENSMUSG00000021998	294.352	1.14105	0.231995	4.91842	8.72472e-07	2.65643e-05	Lcp1
ENSMUSG00000031932	523.212	-0.576169	0.117194	-4.91635	8.81708e-07	2.6799e-05	Gpr83
ENSMUSG00000015476	2349.19	-0.412032	0.0839251	-4.90952	9.13006e-07	2.77024e-05	Prrt1
ENSMUSG00000057346	12.5673	3.84401	0.783636	4.90536	9.32574e-07	2.82474e-05	Apol9a
ENSMUSG00000025534	367.051	0.783696	0.159877	4.90186	9.49337e-07	2.87056e-05	Gusb
ENSMUSG00000021124	1840.53	-0.448317	0.0914847	-4.90046	9.5613e-07	2.88613e-05	Vti1b
ENSMUSG00000114851	41.9317	1.67073	0.340966	4.89997	9.58492e-07	2.8883e-05	Gm46409
ENSMUSG00000029420	2349.79	-0.530605	0.108331	-4.89799	9.68222e-07	2.91262e-05	Rimbp2
ENSMUSG00000026656	144.706	1.45342	0.296825	4.89657	9.75225e-07	2.92867e-05	Fcgr2b
ENSMUSG00000045441	296.728	-0.710578	0.145148	-4.89554	9.80352e-07	2.93905e-05	Gprin3
ENSMUSG00000054675	483.199	0.633052	0.12936	4.89372	9.89477e-07	2.96135e-05	Tmem119
ENSMUSG00000026463	4045.46	-0.585701	0.1197	-4.89307	9.92759e-07	2.96612e-05	Atp2b4
ENSMUSG00000020723	1033	-0.420716	0.0860007	-4.89201	9.9811e-07	2.97705e-05	Cacng4
ENSMUSG00000034116	116.261	1.39314	0.285054	4.88727	1.02246e-06	3.04451e-05	Vav1
ENSMUSG00000025507	79.1854	1.75216	0.359759	4.87036	1.11393e-06	3.31127e-05	Pidd1
ENSMUSG00000009681	3075.36	-0.438631	0.0901088	-4.86779	1.1285e-06	3.34891e-05	Bcr
ENSMUSG00000039879	967.832	0.470021	0.0965928	4.86601	1.13876e-06	3.37364e-05	Heca
ENSMUSG00000038224	18.5764	3.35508	0.689757	4.86415	1.14952e-06	3.3998e-05	Serpinf2
ENSMUSG00000053192	3538.18	-0.421169	0.0866122	-4.8627	1.15795e-06	3.41897e-05	Mllt11
ENSMUSG00000070476	1124.25	-0.408624	0.084073	-4.86034	1.17183e-06	3.45413e-05	Fam217b
ENSMUSG00000068699	99.6176	1.42143	0.292563	4.85855	1.1825e-06	3.47923e-05	Flnc
ENSMUSG00000025351	1024.82	0.601381	0.123786	4.85825	1.1843e-06	3.47923e-05	Cd63
ENSMUSG00000047098	628.506	0.508997	0.104817	4.85605	1.19748e-06	3.51208e-05	Rnf31
ENSMUSG00000030306	1610.73	-0.446707	0.0920183	-4.85455	1.20663e-06	3.53302e-05	Tmtc1
ENSMUSG00000057554	619.354	0.547911	0.112883	4.85379	1.21124e-06	3.54061e-05	Lgals8
ENSMUSG00000073771	180.27	0.913893	0.188387	4.85114	1.22751e-06	3.5771e-05	Btbd19
ENSMUSG00000025582	5465	-0.494874	0.102013	-4.8511	1.2278e-06	3.5771e-05	Nptx1
ENSMUSG00000093673	17.7131	2.52659	0.5212	4.84764	1.24938e-06	3.63395e-05	Gm20644
ENSMUSG00000027805	7493.48	-0.341873	0.0705461	-4.84609	1.25916e-06	3.65246e-05	Pfn2
ENSMUSG00000025964	2643.28	-0.363975	0.0751087	-4.84598	1.2599e-06	3.65246e-05	Adam23
ENSMUSG00000002602	1288.35	0.830756	0.171474	4.84478	1.26753e-06	3.66852e-05	Axl
ENSMUSG00000040613	63.4646	1.49944	0.309935	4.83792	1.31204e-06	3.7911e-05	Apobec1
ENSMUSG00000036986	393.958	0.761585	0.157456	4.83682	1.31933e-06	3.80591e-05	Pml
ENSMUSG00000027122	949.02	0.443	0.0916058	4.83594	1.32519e-06	3.81656e-05	Arl14ep
ENSMUSG00000024965	133.332	1.25623	0.259917	4.83321	1.34346e-06	3.86284e-05	Fermt3
ENSMUSG00000096929	1068.98	0.630045	0.130423	4.83077	1.36004e-06	3.90412e-05	A330023F24Rik
ENSMUSG00000038011	127.948	1.25511	0.259885	4.82949	1.36882e-06	3.91649e-05	Dnah10
ENSMUSG00000052253	976.353	0.482088	0.0998154	4.82979	1.36675e-06	3.91649e-05	Zfp622
ENSMUSG00000026675	437.811	-0.553407	0.114597	-4.82917	1.37104e-06	3.91649e-05	Hsd17b7
ENSMUSG00000020658	4898.52	0.366729	0.0759797	4.82668	1.38829e-06	3.95932e-05	Efr3b
ENSMUSG00000027221	3637.28	-0.475187	0.0985486	-4.82186	1.42227e-06	4.04967e-05	Chst1
ENSMUSG00000035673	552.598	0.553554	0.114861	4.81936	1.44023e-06	4.09417e-05	Sbno2
ENSMUSG00000111765	27.8666	-1.64674	0.34189	-4.81658	1.46037e-06	4.14472e-05	Gm10635
ENSMUSG00000097572	26.5702	1.99582	0.414412	4.81602	1.46446e-06	4.14963e-05	Gm26797
ENSMUSG00000022296	3133.73	-0.444611	0.0923557	-4.81411	1.47854e-06	4.18277e-05	Baalc
ENSMUSG00000076498	68.5726	-1.16349	0.241769	-4.81243	1.49109e-06	4.2115e-05	Trbc2
ENSMUSG00000024912	167.016	0.697593	0.144993	4.81122	1.50011e-06	4.23017e-05	Fosl1
ENSMUSG00000028785	8555.82	-0.59476	0.12363	-4.81082	1.5031e-06	4.23182e-05	Hpca
ENSMUSG00000022964	1576.17	-0.31339	0.0651535	-4.81003	1.50905e-06	4.24176e-05	Tmem50b
ENSMUSG00000001569	599.036	0.467162	0.097146	4.80886	1.5179e-06	4.25981e-05	Nom1
ENSMUSG00000009145	25.6531	1.77737	0.369655	4.80819	1.52301e-06	4.26734e-05	Dqx1
ENSMUSG00000021091	974.871	2.32274	0.483906	4.79997	1.58686e-06	4.43916e-05	Serpina3n
ENSMUSG00000034687	597.496	-0.649857	0.1354	-4.79952	1.59043e-06	4.44207e-05	Fras1
ENSMUSG00000015143	1393.32	-0.560924	0.116959	-4.79591	1.6194e-06	4.51581e-05	Actn1
ENSMUSG00000054065	14.7459	3.83842	0.801545	4.78878	1.678e-06	4.66931e-05	Pkp3
ENSMUSG00000032705	1774.41	-0.467545	0.0976378	-4.78857	1.67976e-06	4.66931e-05	Exd2
ENSMUSG00000030302	12507.1	-0.432276	0.090409	-4.78134	1.74128e-06	4.83268e-05	Atp2b2
ENSMUSG00000040552	84.3464	1.6898	0.353888	4.77494	1.79762e-06	4.98118e-05	C3ar1
ENSMUSG00000044352	1533.86	-0.585775	0.122711	-4.77361	1.80956e-06	5.00636e-05	Sowaha
ENSMUSG00000040972	898.078	-0.479914	0.100678	-4.76683	1.87143e-06	5.16374e-05	Igsf21
ENSMUSG00000039913	726.023	-0.603579	0.126623	-4.76674	1.87232e-06	5.16374e-05	Pak7
ENSMUSG00000030382	26.9491	1.8833	0.395182	4.76565	1.88248e-06	5.18361e-05	Slc27a5
ENSMUSG00000016386	542.318	-0.431559	0.0905774	-4.76454	1.89286e-06	5.20404e-05	Mpped2
ENSMUSG00000026018	594.316	-0.551272	0.115769	-4.76184	1.91838e-06	5.26595e-05	Ica1l
ENSMUSG00000064267	40.3256	1.58248	0.332423	4.76046	1.93152e-06	5.29374e-05	Hvcn1
ENSMUSG00000025366	387.304	0.546352	0.114784	4.75982	1.93767e-06	5.30233e-05	Esyt1
ENSMUSG00000031861	53.1226	1.17265	0.246465	4.75789	1.95625e-06	5.34485e-05	Lpar2
ENSMUSG00000045180	1690.61	-0.462446	0.0972135	-4.75702	1.96472e-06	5.35965e-05	Shroom2
ENSMUSG00000048251	1894.16	-0.449765	0.094562	-4.7563	1.97169e-06	5.37033e-05	Bcl11b
ENSMUSG00000030717	123.723	0.946054	0.198924	4.75585	1.97613e-06	5.37409e-05	Nupr1
ENSMUSG00000030898	700.333	-0.576962	0.121406	-4.75233	2.01091e-06	5.46022e-05	Cckbr
ENSMUSG00000040785	16336.4	-0.484255	0.101924	-4.75112	2.02294e-06	5.48442e-05	Ttc3
ENSMUSG00000090272	42.047	1.50066	0.316627	4.73952	2.1423e-06	5.79907e-05	Mndal
ENSMUSG00000030499	341.263	0.601593	0.126944	4.73905	2.14723e-06	5.80346e-05	Kctd15
ENSMUSG00000056367	1407.45	-0.408883	0.0863253	-4.73653	2.17409e-06	5.86705e-05	Actr3b
ENSMUSG00000028874	13.7747	2.84976	0.601817	4.73527	2.18769e-06	5.89046e-05	Fgr
ENSMUSG00000018543	15.0932	2.30887	0.487607	4.7351	2.18948e-06	5.89046e-05	1700001P01Rik
ENSMUSG00000068259	20.8494	3.18065	0.67193	4.73361	2.20561e-06	5.91574e-05	Olfr461
ENSMUSG00000036678	274.253	0.856369	0.18091	4.73367	2.20501e-06	5.91574e-05	Aaas
ENSMUSG00000108985	16.4281	2.61242	0.552568	4.72777	2.26995e-06	6.07902e-05	A930030B08Rik
ENSMUSG00000018322	1227.44	-0.383963	0.0812465	-4.7259	2.29103e-06	6.12614e-05	Tomm34
ENSMUSG00000022901	69.2552	1.47097	0.31132	4.72496	2.30159e-06	6.14502e-05	Cd86
ENSMUSG00000035152	6424.42	-0.373726	0.0791969	-4.71894	2.37078e-06	6.32015e-05	Ap2b1
ENSMUSG00000007594	2324.11	-0.341551	0.0724106	-4.71687	2.39504e-06	6.37516e-05	Hapln4
ENSMUSG00000030102	7848.27	-0.535757	0.113621	-4.7153	2.41357e-06	6.41477e-05	Itpr1
ENSMUSG00000039079	55.05	-1.12879	0.239509	-4.71293	2.44179e-06	6.47997e-05	Trhr2
ENSMUSG00000074736	555.104	-0.444851	0.0944336	-4.71073	2.46833e-06	6.54052e-05	Syndig1
ENSMUSG00000042425	949.523	-0.39971	0.0849706	-4.7041	2.54994e-06	6.74444e-05	Frmpd3
ENSMUSG00000024172	612.453	-0.564874	0.120087	-4.70385	2.55297e-06	6.74444e-05	St6gal2
ENSMUSG00000003545	656.822	0.593238	0.126141	4.70296	2.56415e-06	6.76381e-05	Fosb
ENSMUSG00000037071	4490.02	-0.3437	0.0731544	-4.69828	2.62368e-06	6.90929e-05	Scd1
ENSMUSG00000061411	973.109	-0.396204	0.0843345	-4.698	2.62717e-06	6.90929e-05	Nol4l
ENSMUSG00000019986	5181.74	-0.301356	0.0641598	-4.69697	2.64055e-06	6.93411e-05	Ahi1
ENSMUSG00000047963	39.8209	1.52974	0.325742	4.69617	2.6508e-06	6.94027e-05	Stbd1
ENSMUSG00000063229	4019.98	-0.407015	0.0866641	-4.69646	2.64705e-06	6.94027e-05	Ldha
ENSMUSG00000055407	2494.63	-0.355002	0.0756371	-4.69349	2.68581e-06	7.02148e-05	Map6
ENSMUSG00000020340	15994.8	-0.402421	0.0857953	-4.69048	2.72571e-06	7.11521e-05	Cyfip2
ENSMUSG00000062007	9.67298	4.54144	0.96881	4.68765	2.76362e-06	7.20196e-05	Hsh2d
ENSMUSG00000017978	1458.44	-0.427608	0.0912251	-4.68739	2.76715e-06	7.20196e-05	Cadps2
ENSMUSG00000034312	5051.46	-0.27986	0.0597237	-4.6859	2.78727e-06	7.2436e-05	Iqsec1
ENSMUSG00000021264	1995.98	0.30366	0.0648356	4.68354	2.81964e-06	7.31691e-05	Yy1
ENSMUSG00000042726	1161.91	0.391436	0.0836755	4.67802	2.89658e-06	7.50547e-05	Trafd1
ENSMUSG00000031662	41.8091	1.38603	0.296326	4.67738	2.90566e-06	7.51792e-05	Snx20
ENSMUSG00000052301	264.464	-0.707707	0.151347	-4.67607	2.9243e-06	7.55502e-05	Doc2a
ENSMUSG00000026547	200.943	0.879504	0.188143	4.67466	2.94444e-06	7.59588e-05	Tagln2
ENSMUSG00000029491	12.8074	3.22679	0.69054	4.67284	2.97057e-06	7.65205e-05	Pde6b
ENSMUSG00000090799	229.877	0.650077	0.139139	4.67213	2.98096e-06	7.66756e-05	Klhl33
ENSMUSG00000022114	918.717	0.411419	0.0881241	4.66864	3.03202e-06	7.7875e-05	Spry2
ENSMUSG00000034336	4096.83	-0.291352	0.0624183	-4.66774	3.04527e-06	7.81011e-05	Ina
ENSMUSG00000025813	1132.4	-0.587057	0.125781	-4.66729	3.05203e-06	7.81605e-05	Homer2
ENSMUSG00000068246	13.8673	3.88989	0.834066	4.66377	3.1047e-06	7.93934e-05	Apol9b
ENSMUSG00000038807	3888.2	-0.364603	0.0781973	-4.6626	3.1224e-06	7.97301e-05	Rap1gap2
ENSMUSG00000005142	1137.46	0.561518	0.120497	4.66002	3.16178e-06	8.06185e-05	Man2b1
ENSMUSG00000068373	2893.79	-0.503368	0.108085	-4.65713	3.20651e-06	8.16405e-05	D430041D05Rik
ENSMUSG00000015355	23.5544	2.36299	0.50764	4.65485	3.24209e-06	8.2427e-05	Cd48
ENSMUSG00000038508	10.9358	4.31149	0.926427	4.65389	3.25733e-06	8.26947e-05	Gdf15
ENSMUSG00000042613	1377.82	0.60635	0.13042	4.6492	3.33225e-06	8.44747e-05	Pbxip1
ENSMUSG00000029622	449.592	0.862349	0.185552	4.64747	3.3603e-06	8.5063e-05	Arpc1b
ENSMUSG00000028451	10.8355	5.30021	1.14131	4.64395	3.41815e-06	8.63767e-05	1700022I11Rik
ENSMUSG00000021624	132.613	2.4299	0.523267	4.64371	3.42203e-06	8.63767e-05	Cd180
ENSMUSG00000026245	853.285	-0.465268	0.100245	-4.64128	3.46255e-06	8.72742e-05	Farsb
ENSMUSG00000020534	73.7811	1.08549	0.233921	4.6404	3.47733e-06	8.75211e-05	Shmt1
ENSMUSG00000027273	29098.8	-0.458557	0.0988442	-4.63919	3.4978e-06	8.79103e-05	Snap25
ENSMUSG00000018008	301.638	0.720211	0.155255	4.63888	3.50304e-06	8.79163e-05	Cyth4
ENSMUSG00000021281	56.3318	1.14463	0.246787	4.63813	3.51571e-06	8.81085e-05	Tnfaip2
ENSMUSG00000031103	49.1102	1.46726	0.317193	4.62577	3.73215e-06	9.33994e-05	Elf4
ENSMUSG00000021313	2943.47	-0.460322	0.0996057	-4.62145	3.81076e-06	9.5231e-05	Ryr2
ENSMUSG00000026483	88.3847	0.999392	0.216337	4.6196	3.84483e-06	9.5946e-05	Fam129a
ENSMUSG00000110275	29.8088	1.86431	0.403823	4.61665	3.89986e-06	9.71301e-05	Gm5905
ENSMUSG00000034708	1759.03	1.22563	0.265491	4.61646	3.90334e-06	9.71301e-05	Grn
ENSMUSG00000020914	62.735	1.53943	0.333637	4.61408	3.94835e-06	9.79727e-05	Top2a
ENSMUSG00000062591	12571.7	-0.383799	0.0831775	-4.61421	3.94591e-06	9.79727e-05	Tubb4a
ENSMUSG00000024335	4043.19	0.276821	0.0600336	4.6111	4.00548e-06	9.925e-05	Brd2
ENSMUSG00000032336	8921.4	-0.43028	0.0933304	-4.61028	4.0212e-06	9.94993e-05	Nptn
ENSMUSG00000026834	410.535	-0.80877	0.175456	-4.60954	4.03569e-06	9.97174e-05	Acvr1c
ENSMUSG00000005320	15.4264	2.98867	0.648438	4.60903	4.04547e-06	9.98185e-05	Fgfr4
ENSMUSG00000038677	194.316	-0.642621	0.139513	-4.60616	4.10167e-06	0.000101063	Scube3
ENSMUSG00000097415	142.583	1.98695	0.43175	4.60208	4.18296e-06	0.000102922	AU020206
ENSMUSG00000107017	13.9246	2.85694	0.62095	4.60093	4.20618e-06	0.000103349	Gm43196
ENSMUSG00000086968	1297.95	-0.344192	0.0748229	-4.6001	4.22297e-06	0.000103616	4933431E20Rik
ENSMUSG00000029397	684.996	0.438224	0.0952761	4.59951	4.23481e-06	0.000103762	Rchy1
ENSMUSG00000022848	1420.69	-0.325958	0.0709062	-4.59703	4.28553e-06	0.000104858	Dirc2
ENSMUSG00000024330	563.808	0.660179	0.143724	4.59337	4.36145e-06	0.000106567	Col11a2
ENSMUSG00000048978	6255.04	-0.330469	0.0719527	-4.59287	4.37191e-06	0.000106675	Nrsn1
ENSMUSG00000025220	4522.83	0.415548	0.0905007	4.59166	4.39736e-06	0.000107147	Mgea5
ENSMUSG00000029198	738.755	0.442708	0.0964512	4.58997	4.43306e-06	0.000107867	Grpel1
ENSMUSG00000019979	442.957	0.735434	0.160253	4.58922	4.44916e-06	0.000107989	Apaf1
ENSMUSG00000074264	392.537	0.451887	0.0984684	4.58916	4.45037e-06	0.000107989	Amy1
ENSMUSG00000029804	3072.87	-0.351388	0.0766567	-4.58392	4.56341e-06	0.000110579	Herc3
ENSMUSG00000020261	1469.12	-0.355961	0.0776912	-4.58175	4.61105e-06	0.00011158	Slc36a1
ENSMUSG00000041889	1771.79	-0.347839	0.0759294	-4.58109	4.62567e-06	0.00011178	Shisa4
ENSMUSG00000067714	18.7784	2.41387	0.526997	4.58042	4.64046e-06	0.000111829	Lpar5
ENSMUSG00000025316	572.285	-0.44894	0.0980084	-4.58063	4.63576e-06	0.000111829	Banp
ENSMUSG00000038147	91.3731	1.52061	0.332285	4.57622	4.73457e-06	0.000113941	Cd84
ENSMUSG00000031004	63.6193	1.29313	0.282696	4.5743	4.77825e-06	0.000114835	Mki67
ENSMUSG00000031349	313.319	-0.505157	0.110597	-4.56754	4.93483e-06	0.000118436	Nsdhl
ENSMUSG00000078349	110.514	1.19739	0.26225	4.56584	4.97509e-06	0.000119239	AW011738
ENSMUSG00000024014	106.16	1.01733	0.22288	4.56448	5.00728e-06	0.000119684	Pim1
ENSMUSG00000025422	14521.5	-0.566539	0.124115	-4.56462	5.00411e-06	0.000119684	Agap2
ENSMUSG00000097451	9711.02	-0.441418	0.0967135	-4.56418	5.01453e-06	0.000119695	Rian
ENSMUSG00000038375	4198.19	-0.309764	0.0679234	-4.56049	5.1035e-06	0.000121653	Trp53inp2
ENSMUSG00000043631	197.3	0.921471	0.202107	4.55931	5.13214e-06	0.00012217	Ecm2
ENSMUSG00000058624	3684	-0.607332	0.13322	-4.55885	5.14338e-06	0.000122272	Gda
ENSMUSG00000044252	3800.41	-0.350533	0.0769093	-4.55775	5.17046e-06	0.00012275	Osbpl1a
ENSMUSG00000062151	1302.91	-0.465485	0.102185	-4.55529	5.23122e-06	0.000124024	Unc13c
ENSMUSG00000059552	448.472	0.554647	0.121894	4.55024	5.35836e-06	0.000126775	Trp53
ENSMUSG00000017493	1191.94	-0.417546	0.0917661	-4.55011	5.36167e-06	0.000126775	Igfbp4
ENSMUSG00000015950	177.493	1.08622	0.238785	4.54895	5.39152e-06	0.000127139	Ncf1
ENSMUSG00000029120	9651	-0.383033	0.0842021	-4.54897	5.39079e-06	0.000127139	Ppp2r2c
ENSMUSG00000069306	16.3838	3.56235	0.783218	4.54835	5.40692e-06	0.000127331	Hist1h4m
ENSMUSG00000000628	106.14	0.979404	0.215546	4.54383	5.52404e-06	0.000129741	Hk2
ENSMUSG00000011752	5251.27	-0.29775	0.0655257	-4.54403	5.51901e-06	0.000129741	Pgam1
ENSMUSG00000044224	492.169	-0.465365	0.1025	-4.54014	5.62171e-06	0.000131859	Dnajc21
ENSMUSG00000021660	1393.46	0.314748	0.069334	4.53959	5.63626e-06	0.000132024	Btf3
ENSMUSG00000023216	10.7435	3.6901	0.81334	4.53698	5.70665e-06	0.000133495	Epb42
ENSMUSG00000036854	131.923	0.831518	0.183335	4.53552	5.74617e-06	0.00013424	Hspb6
ENSMUSG00000020097	817.095	0.464495	0.102419	4.53522	5.75424e-06	0.00013425	Sgpl1
ENSMUSG00000051177	3574.42	-0.518907	0.114463	-4.53341	5.80385e-06	0.000135078	Plcb1
ENSMUSG00000046999	150.918	-0.71091	0.156817	-4.53337	5.80511e-06	0.000135078	1110032F04Rik
ENSMUSG00000022483	62.0372	1.28627	0.283817	4.53205	5.84129e-06	0.00013574	Col2a1
ENSMUSG00000028278	2320.28	-0.463431	0.102263	-4.53176	5.84932e-06	0.000135747	Rragd
ENSMUSG00000047798	18.7272	2.54583	0.561822	4.53138	5.85997e-06	0.000135778	Cd300lf
ENSMUSG00000036578	766.917	-0.736844	0.162617	-4.53116	5.8661e-06	0.000135778	Fxyd7
ENSMUSG00000031511	2548.64	-0.359339	0.0793386	-4.52918	5.92132e-06	0.000136876	Arhgef7
ENSMUSG00000033707	224.571	-0.537094	0.11867	-4.52594	6.01267e-06	0.000138805	Lrrc24
ENSMUSG00000033538	24.1045	2.50813	0.555408	4.51584	6.30673e-06	0.000145212	Casp4
ENSMUSG00000028328	523.206	-0.433766	0.0960521	-4.51594	6.30369e-06	0.000145212	Tmod1
ENSMUSG00000093803	668.56	0.55766	0.123557	4.51338	6.38026e-06	0.000146658	Ppp2r3d
ENSMUSG00000022055	5255.44	-0.361983	0.0802057	-4.51318	6.38622e-06	0.000146658	Nefl
ENSMUSG00000032807	60.9209	-1.10116	0.24422	-4.50889	6.51689e-06	0.000149463	Alox12b
ENSMUSG00000042010	184.464	0.749375	0.166447	4.5022	6.72549e-06	0.000154046	Acacb
ENSMUSG00000026755	1516.81	0.344074	0.0764329	4.50165	6.74276e-06	0.000154241	Arpc5l
ENSMUSG00000030737	417.505	0.734211	0.163163	4.49986	6.79981e-06	0.000155343	Slco2b1
ENSMUSG00000002957	4163.53	-0.288812	0.0642312	-4.49644	6.90996e-06	0.000157655	Ap2a2
ENSMUSG00000037990	533.399	-0.482626	0.10744	-4.49206	7.05372e-06	0.000160726	Sh3rf3
ENSMUSG00000036461	196.55	0.733141	0.163265	4.4905	7.10572e-06	0.000161701	Elf1
ENSMUSG00000033910	1543.99	-0.459571	0.102351	-4.49015	7.11733e-06	0.000161756	Gucy1a1
ENSMUSG00000024457	517.336	0.488592	0.108828	4.48958	7.13649e-06	0.000161851	Trim26
ENSMUSG00000005871	5834.15	-0.491319	0.109438	-4.48947	7.13993e-06	0.000161851	Apc
ENSMUSG00000064367	60463.9	-0.595924	0.13277	-4.48839	7.17647e-06	0.000162469	mt-Nd5
ENSMUSG00000074657	45940.8	-0.396257	0.0883152	-4.48685	7.22833e-06	0.000163433	Kif5a
ENSMUSG00000015243	1329.67	1.10951	0.247413	4.48442	7.31125e-06	0.000165095	Abca1
ENSMUSG00000094103	120.751	-1.29491	0.288791	-4.48389	7.32952e-06	0.000165295	1700047I17Rik2
ENSMUSG00000028841	16.3165	3.43883	0.76707	4.48307	7.35751e-06	0.000165714	Cnksr1
ENSMUSG00000016346	7890.92	-0.4236	0.094526	-4.4813	7.41885e-06	0.000166881	Kcnq2
ENSMUSG00000046805	1093.7	1.93331	0.431721	4.47815	7.52912e-06	0.000169145	Mpeg1
ENSMUSG00000038774	572.781	0.658474	0.147157	4.47463	7.65433e-06	0.000171739	Ascc3
ENSMUSG00000004040	1340.77	0.502859	0.112431	4.47258	7.72809e-06	0.000173172	Stat3
ENSMUSG00000031264	30.4681	1.78734	0.399829	4.47027	7.81215e-06	0.000174833	Btk
ENSMUSG00000034413	812.164	-0.501396	0.112227	-4.4677	7.90648e-06	0.000176719	Neurl1b
ENSMUSG00000029484	274.813	0.885058	0.198127	4.46713	7.92772e-06	0.000176968	Anxa3
ENSMUSG00000031304	20.2749	2.38976	0.535028	4.46661	7.9467e-06	0.000177167	Il2rg
ENSMUSG00000025889	2357.15	-0.52141	0.116924	-4.45939	8.21938e-06	0.000183014	Snca
ENSMUSG00000006342	250.098	-0.654333	0.146783	-4.45782	8.27957e-06	0.000184121	Susd2
ENSMUSG00000026163	2709.15	-0.478719	0.107431	-4.45606	8.34802e-06	0.000185408	Sphkap
ENSMUSG00000021190	2356.62	0.558788	0.125416	4.45549	8.37024e-06	0.000185667	Lgmn
ENSMUSG00000024921	4150.21	-0.312494	0.0701434	-4.45507	8.38642e-06	0.000185792	Smarca2
ENSMUSG00000052533	464.338	0.517896	0.116401	4.44923	8.61799e-06	0.000190681	Nup188
ENSMUSG00000037984	870.372	-0.516352	0.116066	-4.44877	8.6365e-06	0.00019085	Neurod6
ENSMUSG00000064339	61924.8	-0.441269	0.0992587	-4.44565	8.76275e-06	0.000193397	mt-Rnr2
ENSMUSG00000108616	505.497	-0.59997	0.135006	-4.44403	8.8289e-06	0.000194612	Gm35040
ENSMUSG00000078495	66.8171	1.44065	0.324285	4.44255	8.89001e-06	0.000195714	Zfp984
ENSMUSG00000006411	108.805	0.915902	0.206197	4.44188	8.91768e-06	0.00019603	Nectin4
ENSMUSG00000006418	1124.16	0.457744	0.103057	4.44166	8.92668e-06	0.00019603	Rnf114
ENSMUSG00000031165	38.3151	1.58824	0.357721	4.4399	9.00018e-06	0.000197397	Was
ENSMUSG00000030806	9920.83	-0.37958	0.085539	-4.43751	9.10056e-06	0.00019935	Stx1b
ENSMUSG00000020941	153.124	0.678192	0.152962	4.43372	9.2619e-06	0.000202631	Map3k14
ENSMUSG00000036693	408.133	0.514824	0.116148	4.4325	9.31476e-06	0.000203534	Nop14
ENSMUSG00000044811	68.8102	1.45136	0.327487	4.43181	9.34462e-06	0.000203933	Cd300c2
ENSMUSG00000002997	1194.98	-0.438961	0.0990547	-4.4315	9.35793e-06	0.00020397	Prkar2b
ENSMUSG00000036752	3963.91	-0.309341	0.069823	-4.43035	9.40789e-06	0.000204805	Tubb4b
ENSMUSG00000047514	3517.2	-0.303367	0.0685461	-4.42574	9.61127e-06	0.000208974	Tspyl1
ENSMUSG00000063358	10035	-0.424554	0.0959539	-4.42456	9.66373e-06	0.000209768	Mapk1
ENSMUSG00000052087	727.059	-0.445617	0.100718	-4.42439	9.67169e-06	0.000209768	Rgs14
ENSMUSG00000036644	3703.91	-0.255806	0.0578277	-4.4236	9.70714e-06	0.000210278	Tbc1d9b
ENSMUSG00000009216	1888.58	-0.516929	0.11687	-4.42311	9.72911e-06	0.000210494	Fam163b
ENSMUSG00000058153	3991.47	-0.457514	0.103461	-4.42209	9.77492e-06	0.000211225	Sez6l
ENSMUSG00000027971	351.261	-0.710137	0.16065	-4.42039	9.85217e-06	0.000212633	Ndst4
ENSMUSG00000026822	62.6525	3.49934	0.791731	4.41987	9.87615e-06	0.000212879	Lcn2
ENSMUSG00000022439	127.348	0.99368	0.224834	4.41961	9.8878e-06	0.000212879	Parvg
ENSMUSG00000059336	414.855	0.827385	0.187226	4.41918	9.9078e-06	0.000212939	Slc14a1
ENSMUSG00000024524	4096.36	-0.413769	0.0936337	-4.41902	9.91485e-06	0.000212939	Gnal
ENSMUSG00000097039	182.756	0.80635	0.182553	4.41707	1.00047e-05	0.000214606	Pvt1
ENSMUSG00000038146	513.673	0.486008	0.110066	4.41558	1.00739e-05	0.000215827	Notch3
ENSMUSG00000040363	777.921	-0.336654	0.0762764	-4.4136	1.01666e-05	0.000217284	Bcor
ENSMUSG00000013539	1032.54	-0.454057	0.102875	-4.41367	1.01633e-05	0.000217284	Tango2
ENSMUSG00000028064	968.519	-0.430676	0.0975983	-4.41274	1.02071e-05	0.000217884	Sema4a
ENSMUSG00000022952	71.3986	1.59696	0.362347	4.40728	1.04677e-05	0.000223176	Runx1
ENSMUSG00000029223	8422.3	-0.334766	0.0759863	-4.40561	1.05487e-05	0.00022463	Uchl1
ENSMUSG00000022218	46.9132	3.3558	0.761963	4.40414	1.06202e-05	0.000225878	Tgm1
ENSMUSG00000053835	209.328	0.79663	0.180976	4.40186	1.07329e-05	0.000228	H2-T24
ENSMUSG00000025867	16262	-0.510584	0.116002	-4.40149	1.07509e-05	0.000228106	Cplx2
ENSMUSG00000021948	1687.76	0.299414	0.0680718	4.39851	1.08997e-05	0.000230705	Prkcd
ENSMUSG00000029408	850.779	-0.39632	0.0900988	-4.39873	1.08887e-05	0.000230705	Abcb9
ENSMUSG00000037344	697.156	0.456922	0.103963	4.39503	1.10758e-05	0.000234151	Slc12a9
ENSMUSG00000033917	2986.77	-0.319795	0.0727678	-4.39474	1.10907e-05	0.000234185	Gde1
ENSMUSG00000051067	778.41	-0.4605	0.10484	-4.39239	1.1211e-05	0.000236441	Lingo3
ENSMUSG00000030270	842.953	-0.374235	0.0852069	-4.39207	1.12278e-05	0.000236511	Cpne9
ENSMUSG00000028527	786.518	-0.42898	0.0977295	-4.38947	1.13628e-05	0.000239068	Ak4
ENSMUSG00000036712	2867.8	-0.304776	0.0694442	-4.38878	1.13988e-05	0.000239252	Cyld
ENSMUSG00000041199	766.194	-0.413017	0.094105	-4.3889	1.13926e-05	0.000239252	Rpusd1
ENSMUSG00000026259	4217.06	-0.39158	0.0892334	-4.38827	1.14258e-05	0.000239415	Ngef
ENSMUSG00000037679	3171.6	-0.466991	0.106422	-4.38811	1.14338e-05	0.000239415	Inf2
ENSMUSG00000040560	3414.65	-0.37611	0.0857334	-4.38697	1.14942e-05	0.000240392	Wdr7
ENSMUSG00000034881	39.1336	1.491	0.340122	4.3837	1.16678e-05	0.000243642	Tbxa2r
ENSMUSG00000040414	668.02	0.517439	0.118042	4.38353	1.16773e-05	0.000243642	Slc25a28
ENSMUSG00000057060	468.367	-0.503512	0.114905	-4.38198	1.17605e-05	0.000245088	Slc35f3
ENSMUSG00000030111	290.294	2.06586	0.471519	4.38127	1.17988e-05	0.000245594	A2m
ENSMUSG00000063849	269.46	0.56548	0.129114	4.3797	1.18841e-05	0.000247076	Ppcdc
ENSMUSG00000062380	5718.51	-0.465644	0.106361	-4.37795	1.19803e-05	0.000248783	Tubb3
ENSMUSG00000041773	11225	-0.433856	0.0991929	-4.37386	1.22071e-05	0.000253192	Enc1
ENSMUSG00000008384	200.81	0.698735	0.159768	4.37343	1.22309e-05	0.000253387	Sertad1
ENSMUSG00000000290	210.452	1.61062	0.368567	4.36995	1.24273e-05	0.00025686	Itgb2
ENSMUSG00000048142	7851.53	-0.353677	0.080934	-4.36995	1.24278e-05	0.00025686	Nat8l
ENSMUSG00000032440	624.6	0.750891	0.171925	4.36755	1.25648e-05	0.000259388	Tgfbr2
ENSMUSG00000032936	7583.47	-0.463577	0.106148	-4.36728	1.25801e-05	0.000259398	Camkv
ENSMUSG00000026991	4340.87	-0.250844	0.0574631	-4.3653	1.26948e-05	0.000261456	Pkp4
ENSMUSG00000032212	1505.15	0.344732	0.0790066	4.36333	1.28095e-05	0.00026351	Sltm
ENSMUSG00000025612	412.58	0.459785	0.105472	4.3593	1.3048e-05	0.000268101	Bach1
ENSMUSG00000024991	3347.26	0.279253	0.0640799	4.35789	1.31322e-05	0.000269516	Eif3a
ENSMUSG00000011114	709.234	0.402441	0.0924133	4.3548	1.33188e-05	0.000273028	Tbrg1
ENSMUSG00000024164	124.085	2.94336	0.676029	4.3539	1.33736e-05	0.000273685	C3
ENSMUSG00000053332	1031.9	0.385745	0.0886005	4.35376	1.3382e-05	0.000273685	Gas5
ENSMUSG00000057614	3782.26	-0.318531	0.0731716	-4.35321	1.34159e-05	0.000274058	Gnai1
ENSMUSG00000117050	15.464	2.09716	0.481829	4.35249	1.346e-05	0.00027464	AC167363.2
ENSMUSG00000023348	150.266	0.652737	0.149993	4.35178	1.35034e-05	0.000275207	Trip6
ENSMUSG00000022342	1159.32	-0.743828	0.170958	-4.35094	1.35557e-05	0.000275952	Kcnv1
ENSMUSG00000068566	923.953	-0.48782	0.112173	-4.3488	1.36882e-05	0.000278327	Myadm
ENSMUSG00000031778	11356.1	-0.421741	0.0970008	-4.34781	1.37504e-05	0.000279268	Cx3cl1
ENSMUSG00000072680	19.7257	-2.6982	0.620695	-4.34706	1.37977e-05	0.000279905	Tmem254c
ENSMUSG00000024037	531.179	0.448718	0.103232	4.34669	1.38205e-05	0.000280045	Wdr4
ENSMUSG00000001175	38629.4	-0.31998	0.0736344	-4.34553	1.38942e-05	0.000281213	Calm1
ENSMUSG00000030512	357.108	0.587017	0.135204	4.3417	1.41384e-05	0.000285827	Snrpa1
ENSMUSG00000054728	6455.33	-0.439937	0.101364	-4.34016	1.42381e-05	0.000287512	Phactr1
ENSMUSG00000036564	32138.1	-0.343581	0.0793001	-4.33267	1.47315e-05	0.000296792	Ndrg4
ENSMUSG00000030729	5438.25	-0.589489	0.136049	-4.33291	1.4715e-05	0.000296792	Pgm2l1
ENSMUSG00000084846	30.4269	1.46491	0.338145	4.33219	1.47635e-05	0.000297096	A730011C13Rik
ENSMUSG00000062661	6136.07	-0.35092	0.0810089	-4.33187	1.47846e-05	0.000297181	Ncs1
ENSMUSG00000031391	2635.28	-0.303656	0.0701061	-4.33138	1.48176e-05	0.000297504	L1cam
ENSMUSG00000029651	940.795	-0.342679	0.0791471	-4.32964	1.49353e-05	0.000299525	Mtus2
ENSMUSG00000029608	6871.06	-0.361638	0.0835374	-4.32905	1.49755e-05	0.000299988	Rph3a
ENSMUSG00000061603	3916.47	-0.382141	0.0883504	-4.32529	1.52329e-05	0.000304797	Akap6
ENSMUSG00000033508	44.5104	1.43063	0.330906	4.32336	1.5367e-05	0.000307131	Asprv1
ENSMUSG00000003341	28.4707	1.8246	0.422128	4.32239	1.54346e-05	0.00030813	Atp8b3
ENSMUSG00000040283	14.3277	3.25052	0.752573	4.31921	1.56589e-05	0.000312254	Btnl9
ENSMUSG00000031750	710.449	-0.449873	0.104188	-4.3179	1.57524e-05	0.000313762	Il34
ENSMUSG00000024621	2253.57	0.714763	0.165609	4.31598	1.58898e-05	0.000315749	Csf1r
ENSMUSG00000028060	1436.83	0.365164	0.084612	4.31575	1.59061e-05	0.000315749	Khdc4
ENSMUSG00000093910	116.039	-0.841259	0.194924	-4.31583	1.59002e-05	0.000315749	Zfp853
ENSMUSG00000097452	133.11	-0.872568	0.202208	-4.3152	1.5946e-05	0.000316185	Gm2824
ENSMUSG00000031137	2200.39	-0.401804	0.0931487	-4.31357	1.60638e-05	0.00031816	Fgf13
ENSMUSG00000037014	184.746	-0.626991	0.145367	-4.31316	1.60939e-05	0.000318398	Sstr4
ENSMUSG00000023992	384.929	1.59333	0.369476	4.31241	1.61485e-05	0.000319119	Trem2
ENSMUSG00000069270	42.0195	1.94372	0.450815	4.31157	1.62097e-05	0.000319969	Hist1h2ac
ENSMUSG00000109198	22.2845	1.79662	0.416839	4.31011	1.63175e-05	0.000321577	D7Bwg0826e
ENSMUSG00000056812	2100.59	-0.419236	0.0972714	-4.30997	1.63278e-05	0.000321577	St8sia3
ENSMUSG00000116817	20.0505	2.23954	0.519909	4.30755	1.65074e-05	0.00032475	AC110534.3
ENSMUSG00000052572	6128.32	-0.447329	0.103875	-4.3064	1.65933e-05	0.000325788	Dlg2
ENSMUSG00000037185	45.6664	-1.70686	0.39636	-4.30635	1.65972e-05	0.000325788	Krt80
ENSMUSG00000026833	13139.6	-0.371882	0.0863655	-4.3059	1.66305e-05	0.000326077	Olfm1
ENSMUSG00000045930	77.2971	0.870606	0.202237	4.30489	1.67071e-05	0.000327212	Clec14a
ENSMUSG00000050737	91.9744	0.782815	0.181916	4.30317	1.68369e-05	0.000329389	Ptges
ENSMUSG00000028860	39.9368	1.50556	0.350202	4.29912	1.71475e-05	0.000335091	Sytl1
ENSMUSG00000092341	10762.1	0.460006	0.107024	4.29816	1.72219e-05	0.000336171	Malat1
ENSMUSG00000107331	401.484	-0.445311	0.103668	-4.29555	1.74259e-05	0.000339777	Gm42732
ENSMUSG00000025608	823.531	0.47927	0.111631	4.29335	1.75999e-05	0.000342789	Podxl
ENSMUSG00000046159	804.763	-0.475098	0.110767	-4.28918	1.79331e-05	0.000348891	Chrm3
ENSMUSG00000031906	1498.97	-0.453728	0.105824	-4.28757	1.80642e-05	0.000351053	Smpd3
ENSMUSG00000001525	7960.52	-0.329266	0.0768359	-4.28532	1.82478e-05	0.000354229	Tubb5
ENSMUSG00000025092	3949.79	-0.395786	0.0923962	-4.28358	1.83909e-05	0.000356613	Hspa12a
ENSMUSG00000029581	4876.15	-0.368927	0.0861622	-4.28178	1.85404e-05	0.000359116	Fscn1
ENSMUSG00000010142	31.2571	1.45331	0.339637	4.27902	1.8772e-05	0.0003632	Tnfrsf13b
ENSMUSG00000052934	2456.26	-0.334551	0.0782668	-4.2745	1.91568e-05	0.000370239	Fbxo31
ENSMUSG00000101970	371.572	0.468211	0.109615	4.27141	1.94243e-05	0.000374996	1810026B05Rik
ENSMUSG00000095567	1287.62	0.293619	0.0687445	4.27116	1.94459e-05	0.000375	Noc2l
ENSMUSG00000000627	826.915	-0.453809	0.106315	-4.26852	1.96778e-05	0.000379056	Sema4f
ENSMUSG00000106383	167.339	0.651223	0.152605	4.26737	1.9779e-05	0.000380589	E330034L11Rik
ENSMUSG00000040618	593.339	0.481103	0.112781	4.26582	1.99169e-05	0.000382824	Pck2
ENSMUSG00000097998	10.2791	5.21306	1.22301	4.26249	2.02158e-05	0.000387897	Gm27019
ENSMUSG00000021775	2613.31	0.315023	0.0739076	4.26239	2.0225e-05	0.000387897	Nr1d2
ENSMUSG00000003518	2580.56	-0.297215	0.0697525	-4.261	2.03514e-05	0.000389819	Dusp3
ENSMUSG00000042846	772.159	-0.475757	0.111659	-4.2608	2.03697e-05	0.000389819	Lrrtm3
ENSMUSG00000095115	221.749	0.668573	0.156993	4.25862	2.05695e-05	0.000393216	Itpripl2
ENSMUSG00000020717	483.348	0.588779	0.138318	4.25669	2.07477e-05	0.00039619	Pecam1
ENSMUSG00000030134	3636.74	-0.428431	0.100656	-4.25641	2.07739e-05	0.00039626	Rasgef1a
ENSMUSG00000033953	12139.8	-0.389091	0.0914508	-4.25464	2.09382e-05	0.000398961	Ppp3r1
ENSMUSG00000070601	34.3978	-1.35301	0.318143	-4.25283	2.11082e-05	0.000401765	Vmn2r84
ENSMUSG00000031284	2151.98	-0.410075	0.0964319	-4.25249	2.11411e-05	0.000401955	Pak3
ENSMUSG00000071714	43.609	1.35017	0.317523	4.2522	2.11676e-05	0.000402024	Csf2rb2
ENSMUSG00000019832	53.3491	1.13002	0.265861	4.2504	2.13386e-05	0.000404835	Rab32
ENSMUSG00000041147	213.648	0.59135	0.139155	4.24958	2.14176e-05	0.000405894	Brca2
ENSMUSG00000020282	323.574	0.455836	0.107283	4.24893	2.14795e-05	0.00040663	Rhbdf1
ENSMUSG00000029730	332.972	0.561528	0.13217	4.24851	2.15192e-05	0.000406943	Mcm7
ENSMUSG00000079657	451.486	-0.553762	0.130381	-4.24727	2.16392e-05	0.000408772	Rab26
ENSMUSG00000029304	352.605	0.683336	0.160919	4.24646	2.17173e-05	0.000409807	Spp1
ENSMUSG00000026048	533.918	0.442609	0.104271	4.24479	2.188e-05	0.000412434	Ercc5
ENSMUSG00000076432	5421.4	-0.224307	0.0528482	-4.24437	2.19211e-05	0.000412445	Ywhaq
ENSMUSG00000034570	1543.04	-0.41805	0.0984968	-4.2443	2.19276e-05	0.000412445	Inpp5j
ENSMUSG00000022443	2097.41	0.294583	0.0694498	4.24166	2.21871e-05	0.00041688	Myh9
ENSMUSG00000032637	3767.81	0.275013	0.0648442	4.24113	2.224e-05	0.000417427	Atxn2l
ENSMUSG00000041220	1255.24	-0.428235	0.100996	-4.24011	2.23412e-05	0.000418879	Elovl6
ENSMUSG00000024873	3432.08	-0.425998	0.100576	-4.23558	2.27964e-05	0.000426959	Cnih2
ENSMUSG00000039474	2105.72	-0.360183	0.0850653	-4.2342	2.2937e-05	0.000429134	Wfs1
ENSMUSG00000030207	4465.23	-0.254064	0.0600218	-4.23286	2.30742e-05	0.000431242	Fam234b
ENSMUSG00000053025	6557.16	-0.489602	0.115717	-4.23104	2.32614e-05	0.000434278	Sv2b
ENSMUSG00000026227	291.298	0.625898	0.147979	4.22963	2.34076e-05	0.000436544	2810459M11Rik
ENSMUSG00000053175	24.4596	1.55413	0.367529	4.2286	2.35153e-05	0.000438088	Bcl3
ENSMUSG00000030621	707.881	-0.459579	0.108692	-4.22826	2.35506e-05	0.00043828	Me3
ENSMUSG00000028546	1656.29	-0.353224	0.0835856	-4.2259	2.37992e-05	0.000442439	Elavl4
ENSMUSG00000021587	1026.64	-0.505737	0.11975	-4.22328	2.4077e-05	0.00044713	Pcsk1
ENSMUSG00000026088	138.545	0.788284	0.186762	4.22079	2.43451e-05	0.000451631	Mitd1
ENSMUSG00000053963	4465.98	-0.445713	0.105679	-4.21761	2.46904e-05	0.000457555	Stum
ENSMUSG00000001025	218.518	0.940295	0.223004	4.21649	2.48137e-05	0.000459354	S100a6
ENSMUSG00000037725	41.2818	1.511	0.358396	4.216	2.48673e-05	0.000459861	Ckap2
ENSMUSG00000022575	71.5745	1.08842	0.258201	4.21541	2.49322e-05	0.000460576	Gsdmd
ENSMUSG00000016256	935.524	1.26993	0.301324	4.21451	2.50318e-05	0.000461447	Ctsz
ENSMUSG00000065947	404.488	-1.26798	0.300853	-4.21462	2.50202e-05	0.000461447	mt-Nd4l
ENSMUSG00000025730	870.605	0.362031	0.0859125	4.21395	2.50945e-05	0.000462117	Rab40c
ENSMUSG00000000197	2151.17	-0.389475	0.0924817	-4.21137	2.53826e-05	0.000466933	Nalcn
ENSMUSG00000044792	2414.79	-0.353766	0.0840245	-4.21027	2.55062e-05	0.000468717	Isca1
ENSMUSG00000024758	20149.4	-0.334498	0.0794817	-4.2085	2.57077e-05	0.000471925	Rtn3
ENSMUSG00000038020	2364.19	-0.519689	0.123584	-4.20513	2.60927e-05	0.000478493	Rapgefl1
ENSMUSG00000003974	791.399	-0.562286	0.133723	-4.20486	2.61248e-05	0.000478581	Grm3
ENSMUSG00000039728	25.8868	2.2417	0.533393	4.20271	2.63741e-05	0.000482646	Slc6a5
ENSMUSG00000032827	4761.14	-0.480591	0.114392	-4.20127	2.65417e-05	0.000485208	Ppp1r9a
ENSMUSG00000079110	135.217	0.94329	0.224594	4.19997	2.66945e-05	0.000487493	Capn3
ENSMUSG00000026499	1000.59	0.467546	0.111367	4.19825	2.6898e-05	0.000490701	Acbd3
ENSMUSG00000061086	137.366	-1.24647	0.297035	-4.19639	2.712e-05	0.000494236	Myl4
ENSMUSG00000022540	1511.97	-0.344276	0.0821569	-4.19047	2.78381e-05	0.000506797	Rogdi
ENSMUSG00000026031	489.097	0.539552	0.128781	4.18967	2.79357e-05	0.000508049	Cflar
ENSMUSG00000025437	1356.03	-0.422599	0.100876	-4.18929	2.79823e-05	0.000508369	Usp33
ENSMUSG00000026271	28.2675	1.82602	0.435923	4.18885	2.80374e-05	0.000508843	Gpr35
ENSMUSG00000043284	509.465	0.48323	0.115439	4.186	2.83909e-05	0.000514728	Tmem11
ENSMUSG00000030681	209.017	0.793778	0.189664	4.18518	2.84946e-05	0.000516076	Mvp
ENSMUSG00000029648	1459.6	0.319751	0.0764244	4.18389	2.86567e-05	0.000518476	Flt1
ENSMUSG00000007041	203.353	0.848498	0.202882	4.18222	2.88682e-05	0.000521765	Clic1
ENSMUSG00000020691	270.203	0.553747	0.132459	4.18051	2.90858e-05	0.000525158	Mettl2
ENSMUSG00000064357	1643.35	-1.18436	0.283349	-4.17986	2.91694e-05	0.000526128	mt-Atp6
ENSMUSG00000052234	16.6137	1.92843	0.461497	4.17864	2.93257e-05	0.000528404	Epx
ENSMUSG00000031838	83.7135	1.22636	0.293863	4.17322	3.00318e-05	0.000540573	Ifi30
ENSMUSG00000007682	1375.73	-0.50195	0.120344	-4.17097	3.03301e-05	0.000545382	Dio2
ENSMUSG00000030641	16.7462	2.18387	0.523703	4.17006	3.04521e-05	0.000547018	Ddias
ENSMUSG00000062190	1447.69	-0.411734	0.0987525	-4.16936	3.05462e-05	0.000548147	Lancl2
ENSMUSG00000020607	1434.44	-0.405845	0.097348	-4.16901	3.05926e-05	0.000548419	Fam84a
ENSMUSG00000097048	175.617	0.59995	0.143921	4.1686	3.06483e-05	0.000548857	1600020E01Rik
ENSMUSG00000038065	2642.34	-0.27283	0.0654584	-4.16799	3.07292e-05	0.000549746	Mturn
ENSMUSG00000060678	17.5111	2.89731	0.69526	4.16723	3.08324e-05	0.000551032	Hist1h4c
ENSMUSG00000034463	538.821	0.509161	0.122189	4.167	3.0864e-05	0.000551035	Scara3
ENSMUSG00000000384	734.327	0.477802	0.114678	4.16645	3.09376e-05	0.000551789	Tbrg4
ENSMUSG00000014444	217.556	0.606524	0.145695	4.16297	3.14133e-05	0.000559705	Piezo1
ENSMUSG00000031167	1073.23	0.501023	0.120432	4.16021	3.17954e-05	0.000565938	Rbm3
ENSMUSG00000015843	347.66	-0.599312	0.144077	-4.15965	3.18734e-05	0.000566752	Rxrg
ENSMUSG00000068220	203.081	0.679838	0.163559	4.15653	3.23116e-05	0.000573964	Lgals1
ENSMUSG00000029513	323.881	0.561377	0.135079	4.15593	3.23974e-05	0.000574906	Prkab1
ENSMUSG00000056091	1814.19	-0.352303	0.0848078	-4.15413	3.26521e-05	0.000578842	St3gal5
ENSMUSG00000063446	249.154	-0.565553	0.136249	-4.15089	3.31178e-05	0.000586505	Plppr1
ENSMUSG00000023011	8709.34	-0.323228	0.0779278	-4.14778	3.35714e-05	0.000593941	Faim2
ENSMUSG00000044177	87.6347	0.985794	0.237823	4.14508	3.397e-05	0.000600388	Wfikkn2
ENSMUSG00000020456	4783.19	-0.247149	0.0596777	-4.1414	3.45192e-05	0.00060948	Ogdh
ENSMUSG00000026526	1388.07	-0.3498	0.0844877	-4.14025	3.46927e-05	0.000611735	Fh1
ENSMUSG00000024500	2024.16	-0.350311	0.0846142	-4.14009	3.47165e-05	0.000611735	Ppp2r2b
ENSMUSG00000063239	1014.46	-0.432096	0.104402	-4.13875	3.49206e-05	0.000614715	Grm4
ENSMUSG00000001751	229.791	0.793654	0.191816	4.13757	3.51005e-05	0.000617263	Naglu
ENSMUSG00000015605	904.68	-0.33005	0.0797772	-4.13715	3.51648e-05	0.000617776	Srf
ENSMUSG00000033966	240.853	-0.56282	0.136122	-4.13467	3.55462e-05	0.000623851	Cdkl4
ENSMUSG00000033161	14866.7	-0.368523	0.0892129	-4.13083	3.61459e-05	0.000633743	Atp1a1
ENSMUSG00000030401	1468.09	-0.335528	0.0812328	-4.13044	3.62064e-05	0.000634172	Rtn2
ENSMUSG00000006476	6769.68	-0.400635	0.0970428	-4.12843	3.65241e-05	0.000638463	Nsmf
ENSMUSG00000022208	5634.27	-0.496782	0.120331	-4.12848	3.65177e-05	0.000638463	Jph4
ENSMUSG00000028784	24.6274	1.49955	0.363431	4.12608	3.69e-05	0.000644393	Spocd1
ENSMUSG00000040136	549.279	-0.477158	0.115673	-4.12506	3.70634e-05	0.000646604	Abcc8
ENSMUSG00000039717	982.739	-0.362159	0.0878075	-4.12446	3.71598e-05	0.000647642	Ralyl
ENSMUSG00000020297	10018.3	-0.33682	0.0816705	-4.12414	3.7213e-05	0.000647927	Nsg2
ENSMUSG00000047013	2377.19	-0.397481	0.0963876	-4.12378	3.72701e-05	0.000648279	Fbxo41
ENSMUSG00000020886	11832.2	-0.381328	0.0925308	-4.12109	3.77086e-05	0.000655242	Dlg4
ENSMUSG00000115529	70.4601	-0.989946	0.240228	-4.12087	3.7745e-05	0.000655242	9630013A20Rik
ENSMUSG00000040183	870.261	-0.314246	0.0763202	-4.11747	3.83061e-05	0.00066376	Ankrd6
ENSMUSG00000037426	975.393	-0.346985	0.0842721	-4.11743	3.83113e-05	0.00066376	Depdc5
ENSMUSG00000007589	250.743	0.501311	0.121796	4.11598	3.85533e-05	0.000667295	Tinf2
ENSMUSG00000064288	71.8914	2.39212	0.581287	4.11521	3.86831e-05	0.000668474	Hist1h4k
ENSMUSG00000030774	7150.36	-0.355348	0.0863516	-4.11512	3.86975e-05	0.000668474	Pak1
ENSMUSG00000020472	271.514	0.63166	0.15358	4.11291	3.90699e-05	0.000674243	Zkscan17
ENSMUSG00000055632	68.5273	1.42126	0.345618	4.11223	3.91849e-05	0.000675564	Hmcn2
ENSMUSG00000020388	215.966	0.975353	0.237319	4.10989	3.95854e-05	0.000681761	Pdlim4
ENSMUSG00000031639	355.94	0.864657	0.210395	4.10967	3.96219e-05	0.000681761	Tlr3
ENSMUSG00000025364	1161.47	0.337946	0.082284	4.10707	4.00715e-05	0.000688822	Pa2g4
ENSMUSG00000021820	4454.27	-0.253857	0.0618232	-4.10618	4.02253e-05	0.000690789	Camk2g
ENSMUSG00000030793	54.6059	1.23096	0.299955	4.10383	4.06359e-05	0.000696479	Pycard
ENSMUSG00000004730	170.743	0.970898	0.236577	4.10395	4.06158e-05	0.000696479	Adgre1
ENSMUSG00000052760	19.7668	1.94822	0.474825	4.10302	4.07787e-05	0.000698246	A630001G21Rik
ENSMUSG00000045733	2190.54	-0.436147	0.106357	-4.10079	4.11745e-05	0.000704337	Sprn
ENSMUSG00000064368	18601.7	-0.515565	0.12575	-4.09992	4.13291e-05	0.000706294	mt-Nd6
ENSMUSG00000039375	509.53	-0.534884	0.130482	-4.0993	4.14394e-05	0.000707491	Wdr17
ENSMUSG00000022912	347.837	0.80423	0.196264	4.0977	4.17278e-05	0.000711722	Pros1
ENSMUSG00000004846	621.798	0.428196	0.104537	4.09613	4.20122e-05	0.000715184	Plod3
ENSMUSG00000048249	1505.06	0.399711	0.0975824	4.09614	4.201e-05	0.000715184	Crebrf
ENSMUSG00000034115	22.4525	2.05486	0.502462	4.08958	4.32158e-05	0.000734962	Scn11a
ENSMUSG00000056486	8816.29	-0.411252	0.100587	-4.08853	4.34112e-05	0.000737571	Chn1
ENSMUSG00000053004	267.304	-0.516545	0.126362	-4.08782	4.35448e-05	0.000739126	Hrh1
ENSMUSG00000022364	172.143	0.619154	0.151495	4.08695	4.37081e-05	0.000741182	Tbc1d31
ENSMUSG00000030208	77.878	1.14895	0.281178	4.08618	4.38538e-05	0.000742935	Emp1
ENSMUSG00000032939	440.019	0.382835	0.0937142	4.08513	4.40522e-05	0.000745577	Nup93
ENSMUSG00000035486	359.509	-0.512925	0.125778	-4.078	4.54244e-05	0.000768061	Plk5
ENSMUSG00000046675	227.813	0.718562	0.176294	4.07593	4.58302e-05	0.000774178	Tmem251
ENSMUSG00000037686	146.972	1.06947	0.262434	4.0752	4.59753e-05	0.000775814	Aspg
ENSMUSG00000067889	13880.7	-0.474508	0.116444	-4.07499	4.60154e-05	0.000775814	Sptbn2
ENSMUSG00000095217	13.0904	3.01292	0.739917	4.07197	4.66178e-05	0.000784998	Hist1h2bn
ENSMUSG00000020889	2143.3	0.305138	0.0749391	4.07181	4.66495e-05	0.000784998	Nr1d1
ENSMUSG00000001300	1270.02	0.35485	0.0871602	4.07124	4.67637e-05	0.000786167	Efnb2
ENSMUSG00000005087	119.852	1.12609	0.276637	4.07065	4.68828e-05	0.000787416	Cd44
ENSMUSG00000033174	2942.2	-0.273626	0.0672384	-4.06949	4.7117e-05	0.000790593	Mgll
ENSMUSG00000037905	2496.79	-0.266062	0.0653913	-4.06876	4.72642e-05	0.000792306	Bri3bp
ENSMUSG00000015222	16150.3	-0.40895	0.100568	-4.0664	4.77442e-05	0.00079959	Map2
ENSMUSG00000024269	867.516	-0.37107	0.09128	-4.06519	4.79935e-05	0.000803	Tpgs2
ENSMUSG00000025757	3740.68	-0.403065	0.0991913	-4.06351	4.83395e-05	0.00080802	Hspa4l
ENSMUSG00000036246	274.697	0.68029	0.167495	4.06154	4.87492e-05	0.000814093	Gmip
ENSMUSG00000025892	1954.72	-0.349232	0.0859976	-4.06095	4.88735e-05	0.000815393	Gria4
ENSMUSG00000021477	1554.84	0.518186	0.12762	4.06038	4.89936e-05	0.000816623	Ctsl
ENSMUSG00000079033	11.7678	2.44458	0.602258	4.05902	4.92783e-05	0.000819812	Mef2b
ENSMUSG00000020262	5343.95	-0.338233	0.0833255	-4.05918	4.92451e-05	0.000819812	Adarb1
ENSMUSG00000044117	2908.05	-0.359753	0.0886404	-4.05857	4.9374e-05	0.000820626	2900011O08Rik
ENSMUSG00000035649	931.837	-0.356724	0.0879185	-4.05743	4.96147e-05	0.0008232	Zcchc7
ENSMUSG00000027254	20777.7	-0.36767	0.0906171	-4.0574	4.96226e-05	0.0008232	Map1a
ENSMUSG00000005481	317.326	0.468607	0.115502	4.05713	4.96786e-05	0.000823352	Ddx39
ENSMUSG00000037386	1764.85	-0.42441	0.104617	-4.05678	4.97535e-05	0.000823817	Rims2
ENSMUSG00000079480	174.641	0.739473	0.182484	4.05225	5.07264e-05	0.000839135	Pin4
ENSMUSG00000068747	8889.05	-0.277936	0.068655	-4.0483	5.15899e-05	0.000852129	Sort1
ENSMUSG00000073557	2391.05	-0.402636	0.09946	-4.04822	5.16089e-05	0.000852129	Ppp1r12b
ENSMUSG00000031897	586.939	0.605281	0.149587	4.04634	5.20246e-05	0.000858186	Psmb10
ENSMUSG00000097785	215.324	0.665413	0.164503	4.04499	5.23263e-05	0.000862354	B230217O12Rik
ENSMUSG00000050335	30.5561	2.0496	0.506741	4.04467	5.23963e-05	0.000862698	Lgals3
ENSMUSG00000038628	649.856	-0.439973	0.108823	-4.04302	5.27669e-05	0.000867987	Polr3k
ENSMUSG00000001542	512.521	-0.467135	0.115549	-4.04274	5.28301e-05	0.000868212	Ell2
ENSMUSG00000038578	161.284	-0.605394	0.149833	-4.04046	5.33454e-05	0.000875861	Susd1
ENSMUSG00000028708	575.356	0.417445	0.10335	4.03914	5.36467e-05	0.000879985	Mknk1
ENSMUSG00000107215	23.2337	2.05731	0.509723	4.03613	5.43399e-05	0.000890525	Gm43197
ENSMUSG00000112148	16.747	2.16302	0.536427	4.03228	5.52386e-05	0.000904296	Lilrb4a
ENSMUSG00000023004	5734.52	-0.317082	0.0786396	-4.03209	5.52832e-05	0.000904296	Tuba1b
ENSMUSG00000002233	264.874	0.597041	0.14812	4.03078	5.55912e-05	0.000908489	Rhoc
ENSMUSG00000034330	136.978	0.863957	0.214354	4.03053	5.56522e-05	0.000908641	Plcg2
ENSMUSG00000109511	657.355	0.432863	0.107486	4.02715	5.64578e-05	0.000920939	Nup62
ENSMUSG00000078137	766.571	-0.637291	0.158266	-4.0267	5.65645e-05	0.000921824	Ankrd63
ENSMUSG00000076617	311.768	-0.643956	0.159953	-4.02591	5.67561e-05	0.000924089	Ighm
ENSMUSG00000039899	106.876	1.05426	0.261932	4.02493	5.6993e-05	0.000927087	Fgl2
ENSMUSG00000030421	1170.22	0.382638	0.095126	4.02243	5.7601e-05	0.000936109	Uri1
ENSMUSG00000041141	2776.01	-0.318624	0.0792529	-4.02035	5.81128e-05	0.000943554	Pnmal1
ENSMUSG00000028345	411.402	0.391212	0.0973157	4.02003	5.81895e-05	0.000943927	Tex10
ENSMUSG00000027722	257.362	0.496151	0.123462	4.01866	5.85305e-05	0.000948263	Spata5
ENSMUSG00000060882	1949.5	-0.350156	0.0871355	-4.01852	5.85648e-05	0.000948263	Kcnd2
ENSMUSG00000032396	576.192	-0.346858	0.0863323	-4.01771	5.87668e-05	0.000950659	Dis3l
ENSMUSG00000042079	860.92	0.34978	0.0871068	4.01553	5.9313e-05	0.000958611	Hnrnpf
ENSMUSG00000027230	112.731	0.76731	0.191126	4.01468	5.95274e-05	0.000960236	Creb3l1
ENSMUSG00000026864	5394.18	-0.252907	0.0630022	-4.01426	5.96322e-05	0.000960236	Hspa5
ENSMUSG00000047658	762.046	-0.465299	0.11591	-4.01433	5.96153e-05	0.000960236	Gal3st3
ENSMUSG00000064369	159.451	-0.86422	0.21526	-4.01477	5.95048e-05	0.000960236	mt-Te
ENSMUSG00000020496	6512.42	-0.276572	0.0689048	-4.01383	5.97424e-05	0.00096113	Rnf187
ENSMUSG00000014763	1126.4	-0.350926	0.0874763	-4.01168	6.02892e-05	0.000969039	Fam120b
ENSMUSG00000022884	9806.47	-0.289713	0.0722608	-4.00927	6.09069e-05	0.000977181	Eif4a2
ENSMUSG00000020251	156.169	-0.774372	0.193139	-4.0094	6.08733e-05	0.000977181	Glt8d2
ENSMUSG00000109372	411.113	-0.447905	0.111724	-4.00903	6.09698e-05	0.000977297	Gm19410
ENSMUSG00000052749	12.274	2.33639	0.582965	4.00777	6.12949e-05	0.000979715	Trim30b
ENSMUSG00000001166	25.2898	1.72645	0.430746	4.00805	6.12225e-05	0.000979715	Oas1c
ENSMUSG00000052981	3854.58	-0.307667	0.0767712	-4.00758	6.13437e-05	0.000979715	Ube2ql1
ENSMUSG00000036304	611.305	-0.514762	0.12844	-4.0078	6.12882e-05	0.000979715	Zdhhc23
ENSMUSG00000021596	975.849	-0.45804	0.114348	-4.00565	6.18472e-05	0.000986859	Mctp1
ENSMUSG00000085925	206.718	0.569632	0.142396	4.00033	6.32543e-05	0.0010084	Rtl1
ENSMUSG00000063063	2253.99	-0.328049	0.0820302	-3.99912	6.3578e-05	0.00101264	Ctnna2
ENSMUSG00000064125	452.919	-0.45889	0.11483	-3.99626	6.43507e-05	0.00102402	Prr36
ENSMUSG00000037161	9.86634	3.06672	0.767778	3.99427	6.48933e-05	0.00103171	Mgarp
ENSMUSG00000028850	111.348	0.727509	0.182165	3.99369	6.50527e-05	0.00103238	Gpatch3
ENSMUSG00000040659	4147.52	-0.314524	0.0787543	-3.99374	6.50389e-05	0.00103238	Efhd2
ENSMUSG00000104682	14.5903	2.06532	0.517278	3.99267	6.53345e-05	0.00103521	Gm42636
ENSMUSG00000021062	3703.5	-0.39473	0.098865	-3.99262	6.53486e-05	0.00103521	Rab15
ENSMUSG00000029204	22.3747	1.89209	0.474016	3.99161	6.5625e-05	0.00103771	Rhoh
ENSMUSG00000019124	5126.96	-0.239784	0.060071	-3.99167	6.56101e-05	0.00103771	Scrn1
ENSMUSG00000055026	576.421	-0.425615	0.106664	-3.99024	6.60051e-05	0.00104279	Gabrg3
ENSMUSG00000029053	3810.53	-0.324553	0.0813653	-3.98883	6.6399e-05	0.00104654	Prkcz
ENSMUSG00000055675	2103.14	-0.337624	0.0846404	-3.98892	6.63758e-05	0.00104654	Kbtbd11
ENSMUSG00000017491	137.203	-0.626774	0.157135	-3.98875	6.64214e-05	0.00104654	Rarb
ENSMUSG00000070565	1745.31	-0.348029	0.0873006	-3.98656	6.70388e-05	0.00105532	Rasal2
ENSMUSG00000023903	14.268	2.39761	0.601553	3.9857	6.7281e-05	0.00105819	Mmp25
ENSMUSG00000023046	404.189	-0.513223	0.128925	-3.98078	6.86885e-05	0.00107936	Igfbp6
ENSMUSG00000022048	3459.39	-0.295564	0.0743051	-3.97771	6.95825e-05	0.00109243	Dpysl2
ENSMUSG00000021087	17857.6	-0.280584	0.0705523	-3.97697	6.98003e-05	0.00109487	Rtn1
ENSMUSG00000024186	515.423	-0.626791	0.15763	-3.97634	6.99839e-05	0.00109677	Rgs11
ENSMUSG00000021072	920.006	0.337964	0.0850541	3.97352	7.0818e-05	0.00110885	Tmx1
ENSMUSG00000096351	45.5104	1.21289	0.305271	3.97316	7.09268e-05	0.00110957	Samd11
ENSMUSG00000037411	50.3433	1.28625	0.323788	3.97251	7.11182e-05	0.00111157	Serpine1
ENSMUSG00000074342	34.605	1.58144	0.398118	3.9723	7.11827e-05	0.00111159	I830077J02Rik
ENSMUSG00000038178	1197.6	-0.314564	0.0792426	-3.96964	7.19814e-05	0.00112286	Slc43a2
ENSMUSG00000038860	1256.62	-0.371349	0.0935514	-3.96947	7.20326e-05	0.00112286	Garnl3
ENSMUSG00000044244	14.9298	2.12538	0.535568	3.96845	7.23423e-05	0.00112669	Il20rb
ENSMUSG00000040738	477.311	-0.477933	0.120448	-3.96797	7.24868e-05	0.00112794	Ints8
ENSMUSG00000025986	3621.59	-0.48007	0.12101	-3.96721	7.27198e-05	0.00113057	Slc39a10
ENSMUSG00000032218	30.1634	1.41341	0.356485	3.96485	7.34414e-05	0.00114053	Ccnb2
ENSMUSG00000021743	427.444	-0.586696	0.14798	-3.96469	7.34907e-05	0.00114053	Fezf2
ENSMUSG00000110206	78.0671	1.01358	0.255685	3.96417	7.36511e-05	0.00114201	Flt3l
ENSMUSG00000027298	3266.22	-0.415447	0.104837	-3.96277	7.4084e-05	0.00114771	Tyro3
ENSMUSG00000039376	10.5249	2.76503	0.697837	3.96229	7.42357e-05	0.00114905	Synpo2l
ENSMUSG00000068923	14106.9	-0.229814	0.0580171	-3.96114	7.45928e-05	0.00115323	Syt11
ENSMUSG00000029869	1697.01	-0.355101	0.0896493	-3.961	7.4637e-05	0.00115323	Ephb6
ENSMUSG00000024841	437.88	0.424679	0.107222	3.96073	7.47207e-05	0.00115351	Eif1ad
ENSMUSG00000087306	10.9284	2.674	0.675371	3.95931	7.51669e-05	0.00115938	A230004M16Rik
ENSMUSG00000071478	12.5733	2.89556	0.731535	3.9582	7.55165e-05	0.00116375	Hist1h2ad
ENSMUSG00000051747	43.2232	1.11481	0.281775	3.95637	7.60965e-05	0.00117166	Ttn
ENSMUSG00000007207	2963.83	-0.47159	0.119301	-3.95295	7.7193e-05	0.0011875	Stx1a
ENSMUSG00000002769	23.8988	1.58374	0.400762	3.95183	7.75558e-05	0.00119204	Gnmt
ENSMUSG00000033066	6154.58	-0.4051	0.102575	-3.94932	7.83739e-05	0.00120356	Gas7
ENSMUSG00000024403	5815.25	-0.357052	0.0904552	-3.94728	7.90441e-05	0.00121279	Atp6v1g2
ENSMUSG00000027347	7856.83	-0.502339	0.127271	-3.947	7.91369e-05	0.00121316	Rasgrp1
ENSMUSG00000106350	9.69583	3.42163	0.867293	3.94519	7.97374e-05	0.0012213	Gm4869
ENSMUSG00000032192	2115.2	-0.345668	0.0876628	-3.94315	8.04184e-05	0.00123065	Gnb5
ENSMUSG00000032018	1134.22	-0.605108	0.153546	-3.9409	8.11781e-05	0.0012412	Sc5d
ENSMUSG00000023832	560.745	-0.443121	0.112535	-3.93762	8.22934e-05	0.00125716	Acat2
ENSMUSG00000024013	173.162	0.932375	0.237016	3.93381	8.36089e-05	0.00127614	Fgd2
ENSMUSG00000023960	4832.43	-0.297842	0.0757362	-3.93263	8.40231e-05	0.00128135	Enpp5
ENSMUSG00000069114	294.25	0.514147	0.130852	3.92922	8.52226e-05	0.00129852	Zbtb10
ENSMUSG00000116604	17.4357	2.06769	0.526362	3.92826	8.55625e-05	0.00130133	AC087898.2
ENSMUSG00000108348	2029.45	-0.333184	0.0848137	-3.92842	8.55073e-05	0.00130133	Gm42372
ENSMUSG00000041771	443.251	-0.552548	0.140666	-3.92807	8.56295e-05	0.00130133	Slc24a4
ENSMUSG00000025480	10.3843	2.82625	0.71965	3.92726	8.59193e-05	0.00130284	Syce1
ENSMUSG00000001280	649.688	0.384789	0.0979795	3.92724	8.59267e-05	0.00130284	Sp1
ENSMUSG00000040536	1978.78	-0.453625	0.115509	-3.92717	8.59511e-05	0.00130284	Necab1
ENSMUSG00000074622	575.869	0.634058	0.161477	3.92662	8.61492e-05	0.00130359	Mafb
ENSMUSG00000058388	738.094	-0.387462	0.0986754	-3.92664	8.61411e-05	0.00130359	Phtf1
ENSMUSG00000025283	846.176	0.448173	0.114219	3.92379	8.71663e-05	0.00131762	Sat1
ENSMUSG00000028468	772.746	0.37489	0.0955469	3.92363	8.72262e-05	0.00131762	Rgp1
ENSMUSG00000106025	16.9795	1.99531	0.508673	3.92258	8.76043e-05	0.00132164	Gm42940
ENSMUSG00000052889	6616.49	-0.390983	0.0996777	-3.92248	8.7643e-05	0.00132164	Prkcb
ENSMUSG00000103865	47.0136	1.60293	0.408765	3.9214	8.80368e-05	0.00132644	Gm37416
ENSMUSG00000061808	9039.5	0.478112	0.12194	3.92088	8.82246e-05	0.00132813	Ttr
ENSMUSG00000090071	6083.17	-0.421353	0.10748	-3.92027	8.84487e-05	0.00133037	Cdk5r2
ENSMUSG00000022863	381.62	0.420291	0.107221	3.91985	8.86049e-05	0.00133158	Btg3
ENSMUSG00000019370	23251.1	-0.342358	0.0873564	-3.91909	8.88834e-05	0.00133348	Calm3
ENSMUSG00000040125	3446.28	-0.434062	0.11075	-3.9193	8.8808e-05	0.00133348	Gpr26
ENSMUSG00000026017	333.51	-0.606551	0.154792	-3.91849	8.91059e-05	0.00133568	Carf
ENSMUSG00000023186	367.755	0.73204	0.18686	3.91758	8.9443e-05	0.00133959	Vwa5a
ENSMUSG00000033777	86.7052	1.27461	0.325409	3.91695	8.96778e-05	0.00134086	Tlr13
ENSMUSG00000031805	206.211	0.607354	0.155058	3.91694	8.96804e-05	0.00134086	Jak3
ENSMUSG00000021314	3515	-0.274648	0.0701357	-3.91595	9.00483e-05	0.00134293	Amph
ENSMUSG00000061578	1034.77	-0.360109	0.0919568	-3.91606	9.00061e-05	0.00134293	Ksr2
ENSMUSG00000031112	174.19	-0.659596	0.16843	-3.91615	8.99761e-05	0.00134293	Stk26
ENSMUSG00000043463	592.165	-0.418771	0.107012	-3.9133	9.1045e-05	0.00135664	Rab9b
ENSMUSG00000047084	693.304	0.355239	0.0907866	3.9129	9.11955e-05	0.00135773	Ngrn
ENSMUSG00000039530	2732.5	-0.361953	0.0925549	-3.91069	9.2034e-05	0.00136905	Tusc3
ENSMUSG00000031170	88.5609	0.907219	0.23201	3.91026	9.21983e-05	0.00137034	Slc38a5
ENSMUSG00000000732	153.721	1.00867	0.258029	3.90913	9.26277e-05	0.00137464	Icosl
ENSMUSG00000053783	27.0655	-1.4682	0.375585	-3.90909	9.26442e-05	0.00137464	1700016K19Rik
ENSMUSG00000022462	3868.82	0.331192	0.0847557	3.90761	9.32137e-05	0.00138192	Slc38a2
ENSMUSG00000006360	67.3223	1.02387	0.26209	3.90656	9.36183e-05	0.00138675	Crip1
ENSMUSG00000117255	14.6458	1.9956	0.511156	3.90409	9.45791e-05	0.0013998	AC140278.1
ENSMUSG00000052488	1267.61	0.385246	0.0986888	3.90365	9.47545e-05	0.00140122	Cherp
ENSMUSG00000026728	1446.62	1.31207	0.336539	3.89872	9.67016e-05	0.00142881	Vim
ENSMUSG00000076612	34.6276	-1.18529	0.304347	-3.89455	9.83818e-05	0.00145241	Ighg2c
ENSMUSG00000039686	3712.96	-0.240181	0.0616787	-3.89407	9.8576e-05	0.00145406	Zer1
ENSMUSG00000034187	15031.4	-0.290774	0.0746796	-3.89362	9.87584e-05	0.00145553	Nsf
ENSMUSG00000020953	533.048	-0.446282	0.114648	-3.89264	9.91581e-05	0.00146019	Coch
ENSMUSG00000038132	337.502	-0.484225	0.124405	-3.89234	9.9282e-05	0.00146079	Rbm24
ENSMUSG00000060988	667.912	-0.48495	0.124607	-3.89183	9.94899e-05	0.00146263	Galnt13
ENSMUSG00000044534	23.7804	-1.59057	0.408756	-3.89123	9.97355e-05	0.00146501	Ackr2
ENSMUSG00000026797	17551.9	-0.324327	0.0833799	-3.88976	0.000100345	0.00147273	Stxbp1
ENSMUSG00000064361	32.9777	-1.2519	0.321931	-3.88872	0.000100776	0.00147782	mt-Tr
ENSMUSG00000055541	226.02	0.908259	0.233616	3.88783	0.000101145	0.001482	Lair1
ENSMUSG00000014592	5335.49	-0.285019	0.0733273	-3.88694	0.000101514	0.00148616	Camta1
ENSMUSG00000027778	510.858	-0.365913	0.0941699	-3.88567	0.00010205	0.00149255	Ift80
ENSMUSG00000038668	694.134	-0.413718	0.106477	-3.8855	0.00010212	0.00149255	Lpar1
ENSMUSG00000096847	2126.32	-0.477411	0.122892	-3.8848	0.000102412	0.00149558	Tmem151b
ENSMUSG00000042644	157.99	0.622712	0.160307	3.8845	0.00010254	0.00149619	Itpr3
ENSMUSG00000112105	15.5443	1.85025	0.476389	3.88392	0.000102787	0.00149855	Rps7-ps2
ENSMUSG00000034595	169.968	0.641991	0.165306	3.88365	0.000102899	0.00149895	Ppp1r18
ENSMUSG00000056888	17.5044	2.11122	0.544058	3.8805	0.00010424	0.00151722	Glipr1
ENSMUSG00000072707	10.0586	3.20128	0.825091	3.87991	0.000104494	0.00151841	Olfr31
ENSMUSG00000015451	57.5061	0.925492	0.238534	3.87992	0.000104491	0.00151841	C4a
ENSMUSG00000031387	75.4594	1.04961	0.270556	3.87945	0.000104694	0.00152005	Renbp
ENSMUSG00000064372	767.352	-0.393589	0.101487	-3.8782	0.00010523	0.00152658	mt-Tp
ENSMUSG00000031840	8853.05	-0.308149	0.0795248	-3.87488	0.000106678	0.00154519	Rab3a
ENSMUSG00000021721	329.941	-0.536548	0.138469	-3.87485	0.000106689	0.00154519	Htr1a
ENSMUSG00000026721	2214.68	-0.445029	0.114883	-3.87375	0.000107175	0.00155095	Rabgap1l
ENSMUSG00000071647	283.462	0.539218	0.139267	3.87184	0.000108016	0.00156184	Eml3
ENSMUSG00000032011	9317.13	-0.321779	0.0831154	-3.87148	0.000108178	0.00156289	Thy1
ENSMUSG00000039148	1244.4	0.530494	0.137054	3.87069	0.000108526	0.00156662	Sart1
ENSMUSG00000086837	18.824	1.65175	0.427122	3.86716	0.000110111	0.0015882	Gm16618
ENSMUSG00000029231	991.038	-0.319295	0.0825852	-3.86625	0.000110523	0.00159283	Pdgfra
ENSMUSG00000071866	6966.17	-0.569282	0.147266	-3.86568	0.00011078	0.00159523	Ppia
ENSMUSG00000023927	1690.65	-0.407004	0.105303	-3.86507	0.000111059	0.00159794	Satb1
ENSMUSG00000024679	39.8869	1.47841	0.382607	3.86403	0.000111532	0.00160344	Ms4a6d
ENSMUSG00000033615	10678.9	-0.298189	0.07724	-3.86055	0.000113133	0.00162512	Cplx1
ENSMUSG00000034729	445.497	0.432536	0.112078	3.85925	0.000113734	0.00163242	Mrps10
ENSMUSG00000094626	1211.89	-0.586779	0.152056	-3.85896	0.000113871	0.00163305	Tmem121b
ENSMUSG00000027961	22.2358	1.49692	0.388145	3.85661	0.000114972	0.00164749	Lrrc39
ENSMUSG00000090693	32.9314	1.25237	0.324804	3.85577	0.000115367	0.00165181	Trim43a
ENSMUSG00000060935	662.267	-0.43321	0.112366	-3.85536	0.000115559	0.00165321	Tmem263
ENSMUSG00000043388	4810.31	-0.248111	0.0643638	-3.85482	0.000115813	0.0016555	Tmem130
ENSMUSG00000021822	59.295	0.971108	0.252078	3.8524	0.000116964	0.00167058	Plau
ENSMUSG00000004609	213.765	0.818945	0.212625	3.8516	0.00011735	0.00167338	Cd33
ENSMUSG00000031668	593.487	0.379443	0.0985108	3.85179	0.000117257	0.00167338	Eif2ak3
ENSMUSG00000024245	871.038	-0.406383	0.105522	-3.85117	0.000117554	0.00167494	Tmem178
ENSMUSG00000020399	73.3763	1.36856	0.355436	3.85037	0.000117938	0.00167841	Havcr2
ENSMUSG00000025427	1196.51	-0.471012	0.122332	-3.85027	0.000117989	0.00167841	Rnf165
ENSMUSG00000019852	2395.07	-0.389688	0.101233	-3.84941	0.000118404	0.00168295	Arfgef3
ENSMUSG00000028923	687.365	0.493581	0.128233	3.84909	0.00011856	0.00168351	Necap2
ENSMUSG00000025151	9634.48	-0.222253	0.0577442	-3.84893	0.000118635	0.00168351	Maged1
ENSMUSG00000069833	765.322	0.366923	0.095348	3.84825	0.000118967	0.00168685	Ahnak
ENSMUSG00000050014	11.9992	2.28008	0.592688	3.84701	0.00011957	0.00169402	Apol10b
ENSMUSG00000057378	909.175	-0.454701	0.118208	-3.84661	0.000119762	0.00169402	Ryr3
ENSMUSG00000048038	249.317	-0.500857	0.130207	-3.84664	0.000119751	0.00169402	Ccdc187
ENSMUSG00000015023	452.285	0.409352	0.106452	3.84543	0.000120342	0.00169956	Ddx19a
ENSMUSG00000026135	837.743	0.341971	0.0889294	3.84542	0.000120347	0.00169956	Zfp142
ENSMUSG00000032224	2481.87	-0.449172	0.116818	-3.84506	0.000120522	0.00170067	Fam81a
ENSMUSG00000021732	130.826	-0.690148	0.1795	-3.84484	0.000120629	0.00170081	Fgf10
ENSMUSG00000037710	1142.5	-0.320079	0.0833014	-3.84242	0.000121829	0.00171635	Cisd1
ENSMUSG00000016206	82.8296	0.825262	0.214824	3.84156	0.000122253	0.00172094	H2-M3
ENSMUSG00000002052	3688.49	0.22181	0.0577467	3.84108	0.000122492	0.00172293	Supt6
ENSMUSG00000037509	2982.3	-0.262101	0.0683218	-3.83627	0.000124918	0.00175564	Arhgef4
ENSMUSG00000025432	24.9543	1.59714	0.416373	3.83583	0.00012514	0.00175736	Avil
ENSMUSG00000030577	13.8078	2.48813	0.64949	3.8309	0.000127677	0.00179156	Cd22
ENSMUSG00000048406	70.1357	1.00034	0.261281	3.82862	0.000128863	0.00180676	B330016D10Rik
ENSMUSG00000001229	1623.52	-0.262083	0.06848	-3.82714	0.000129638	0.00181618	Dpp9
ENSMUSG00000079036	342.383	0.456168	0.11924	3.82563	0.00013044	0.00182595	Alkbh1
ENSMUSG00000051853	17856.3	-0.312737	0.0818247	-3.82204	0.000132354	0.00185127	Arf3
ENSMUSG00000026785	37.6297	1.24213	0.32514	3.8203	0.000133291	0.00186289	Pkn3
ENSMUSG00000040543	2220.97	-0.382138	0.100053	-3.81937	0.000133791	0.00186839	Pitpnm3
ENSMUSG00000020436	2742.73	-0.344558	0.0902773	-3.81666	0.00013527	0.00188755	Gabrg2
ENSMUSG00000047428	488.804	-0.457422	0.119913	-3.8146	0.000136402	0.00190183	Dlk2
ENSMUSG00000021301	1316.59	-0.407829	0.10702	-3.81079	0.000138523	0.00192987	Hecw1
ENSMUSG00000059406	34.7991	1.42878	0.374999	3.81008	0.000138921	0.00193083	Tmprss9
ENSMUSG00000024349	85.2401	1.01581	0.266605	3.81017	0.000138872	0.00193083	Tmem173
ENSMUSG00000030409	517.169	0.563318	0.147845	3.81018	0.000138865	0.00193083	Dmpk
ENSMUSG00000023147	977.805	-0.276091	0.072507	-3.80778	0.000140218	0.00194731	Wrb
ENSMUSG00000023078	20.1596	6.18012	1.62321	3.80733	0.000140475	0.00194933	Cxcl13
ENSMUSG00000003352	3400.38	-0.358687	0.0942267	-3.80663	0.000140871	0.00195329	Cacnb3
ENSMUSG00000030703	80.7349	2.48961	0.654208	3.80553	0.000141502	0.00196049	Gdpd3
ENSMUSG00000021665	1798.88	1.01893	0.267986	3.80217	0.000143436	0.00198416	Hexb
ENSMUSG00000039059	1458.05	-0.316048	0.0831188	-3.80236	0.000143326	0.00198416	Hrh3
ENSMUSG00000058440	410.725	0.392285	0.103208	3.80092	0.000144162	0.00199118	Nrf1
ENSMUSG00000021557	3354.38	-0.373764	0.0983356	-3.8009	0.00014417	0.00199118	Agtpbp1
ENSMUSG00000040389	2483.32	-0.312823	0.0824492	-3.79413	0.000148165	0.00204475	Wdr47
ENSMUSG00000036560	353.22	0.612423	0.161495	3.7922	0.000149317	0.00205903	Lgi4
ENSMUSG00000015757	684.549	-0.436356	0.115076	-3.79189	0.000149502	0.00205996	Ppil4
ENSMUSG00000037669	671.875	-0.305012	0.0804761	-3.79009	0.000150593	0.00207336	Ldah
ENSMUSG00000071796	222.584	0.568489	0.150012	3.78962	0.00015088	0.0020757	6820431F20Rik
ENSMUSG00000041762	1165.34	-0.303345	0.0800677	-3.78861	0.000151491	0.00208247	Gpr155
ENSMUSG00000020577	3163.24	-0.296426	0.0782559	-3.78791	0.000151921	0.00208675	Tspan13
ENSMUSG00000022773	379.989	-0.478859	0.126429	-3.78758	0.000152119	0.00208783	Ypel1
ENSMUSG00000021453	381.927	0.666872	0.176213	3.78446	0.000154044	0.00211261	Gadd45g
ENSMUSG00000029403	657.144	-0.417398	0.110391	-3.78108	0.000156152	0.00213984	Cdkl2
ENSMUSG00000045589	6058.38	-0.421939	0.111634	-3.77966	0.00015704	0.00215034	Frrs1l
ENSMUSG00000021852	214.693	-0.505434	0.133742	-3.77918	0.000157344	0.00215282	Slc35f4
ENSMUSG00000023944	26017.2	-0.217932	0.0577053	-3.77664	0.00015896	0.00217324	Hsp90ab1
ENSMUSG00000035246	861.128	-0.35482	0.093971	-3.77585	0.000159463	0.00217842	Pcyt1b
ENSMUSG00000052852	2688.14	-0.27334	0.0724035	-3.77523	0.000159859	0.00218213	Reep1
ENSMUSG00000036622	3285.11	-0.344833	0.0913526	-3.77474	0.000160172	0.00218471	Atp13a2
ENSMUSG00000056498	13.0928	1.95142	0.517008	3.77444	0.000160367	0.00218568	Tmem154
ENSMUSG00000024131	11.8019	2.82834	0.749497	3.77366	0.000160871	0.00219084	Slc3a1
ENSMUSG00000015837	8660.72	0.277046	0.0734329	3.77277	0.000161444	0.00219694	Sqstm1
ENSMUSG00000020092	259.84	0.543643	0.144174	3.77074	0.000162763	0.00221247	Pald1
ENSMUSG00000052479	75.0427	-0.7971	0.211397	-3.77063	0.000162837	0.00221247	A330008L17Rik
ENSMUSG00000034310	668.817	-0.399391	0.10598	-3.76854	0.000164204	0.00222931	Tmem132d
ENSMUSG00000033676	4861.63	-0.40174	0.106615	-3.76813	0.000164473	0.00223124	Gabrb3
ENSMUSG00000074971	115.722	0.83617	0.221919	3.7679	0.000164626	0.0022316	Fibin
ENSMUSG00000037993	812.164	0.324857	0.0862847	3.76495	0.000166584	0.00225491	Dhx38
ENSMUSG00000003346	2298.55	-0.335953	0.0892323	-3.76492	0.000166603	0.00225491	Abhd17a
ENSMUSG00000030465	8377.28	-0.438713	0.116533	-3.76472	0.000166735	0.00225497	Psd3
ENSMUSG00000028931	7471.6	-0.362592	0.0963561	-3.76304	0.00016786	0.00226843	Kcnab2
ENSMUSG00000032606	1434.61	-0.258786	0.0687789	-3.76258	0.000168167	0.00227084	Nicn1
ENSMUSG00000005198	1971.7	0.341754	0.0908667	3.76104	0.000169205	0.00227883	Polr2a
ENSMUSG00000055239	1383.34	0.286057	0.07606	3.76094	0.000169278	0.00227883	Kcmf1
ENSMUSG00000003575	3534.96	-0.34822	0.0925862	-3.76103	0.000169214	0.00227883	Crtc1
ENSMUSG00000111375	1642.76	-0.356943	0.0948953	-3.76144	0.000168941	0.00227883	Btbd8
ENSMUSG00000042388	6648.34	-0.549922	0.146293	-3.75905	0.000170562	0.00229436	Dlgap3
ENSMUSG00000032078	640.854	0.351077	0.0934207	3.75802	0.000171261	0.002302	Zpr1
ENSMUSG00000059498	241.877	0.893556	0.237826	3.75719	0.000171832	0.00230792	Fcgr3
ENSMUSG00000028583	206.905	0.739949	0.197044	3.75526	0.000173164	0.00232047	Pdpn
ENSMUSG00000018143	317.037	0.672559	0.179083	3.75557	0.000172949	0.00232047	Mafk
ENSMUSG00000002307	497.485	0.423473	0.112767	3.75529	0.000173143	0.00232047	Daxx
ENSMUSG00000005986	904.175	-0.318489	0.0848272	-3.75457	0.000173642	0.00232333	Ankrd13d
ENSMUSG00000020846	290.585	-0.473644	0.126147	-3.75469	0.000173553	0.00232333	Rflnb
ENSMUSG00000041268	3774.95	-0.382695	0.101987	-3.75239	0.000175157	0.00234182	Dmxl2
ENSMUSG00000006517	314.633	-0.691936	0.184449	-3.75136	0.000175878	0.00234967	Mvd
ENSMUSG00000037542	11.5061	2.45587	0.654702	3.75112	0.000176045	0.00235012	Aldh8a1
ENSMUSG00000032231	243.613	0.618305	0.164874	3.75017	0.000176717	0.00235731	Anxa2
ENSMUSG00000021282	4989.48	0.375429	0.100117	3.74992	0.000176892	0.00235784	Eif5
ENSMUSG00000034209	431.205	-0.670744	0.17888	-3.74969	0.000177055	0.00235823	Rasl10a
ENSMUSG00000060791	27.2002	1.34992	0.360073	3.74903	0.000177522	0.00236265	Gmfg
ENSMUSG00000029054	1019.27	-0.409871	0.10934	-3.74859	0.000177833	0.00236501	Gabrd
ENSMUSG00000036782	992.219	-0.295266	0.0788124	-3.74644	0.000179364	0.00238356	Klhl13
ENSMUSG00000029126	4630.01	-0.270391	0.0721879	-3.74566	0.000179918	0.00238912	Nsg1
ENSMUSG00000019916	1038.25	-0.350888	0.0936948	-3.74501	0.000180384	0.0023935	P4ha1
ENSMUSG00000040888	309.464	0.540189	0.144276	3.74413	0.000181021	0.00240013	Gfer
ENSMUSG00000032577	79.8692	0.861125	0.230141	3.74173	0.000182755	0.00241947	Mapkapk3
ENSMUSG00000077450	3206	-0.260993	0.0697487	-3.7419	0.000182632	0.00241947	Rab11b
ENSMUSG00000029468	291.028	0.836333	0.223531	3.74147	0.000182949	0.00242021	P2rx7
ENSMUSG00000042744	5271.15	-0.344667	0.0921279	-3.74118	0.000183155	0.00242112	Hectd4
ENSMUSG00000006724	19.401	1.54223	0.412363	3.73997	0.00018404	0.00243099	Cyp27b1
ENSMUSG00000039501	1869.06	0.391326	0.104655	3.73919	0.000184614	0.00243673	Znfx1
ENSMUSG00000018819	73.6575	0.796976	0.213165	3.73878	0.000184912	0.00243884	Lsp1
ENSMUSG00000039853	26.5293	1.80353	0.482567	3.73736	0.000185965	0.00245088	Trim14
ENSMUSG00000021983	1195.37	-0.312941	0.0837638	-3.736	0.000186973	0.00246232	Atp8a2
ENSMUSG00000078794	3052.39	-0.332669	0.0890624	-3.73523	0.000187541	0.00246796	Dact3
ENSMUSG00000026447	689.149	-0.371332	0.0994603	-3.73347	0.000188862	0.00248348	Pik3c2b
ENSMUSG00000034981	1221.37	-0.350656	0.0939575	-3.73207	0.000189912	0.00249541	Parm1
ENSMUSG00000040918	454.439	0.551994	0.147969	3.73047	0.00019112	0.00250941	Slc19a2
ENSMUSG00000070420	261.17	0.480843	0.128904	3.73024	0.000191295	0.00250984	Zscan25
ENSMUSG00000032966	7899.1	-0.290135	0.0778351	-3.72756	0.000193341	0.00253184	Fkbp1a
ENSMUSG00000021196	5708.94	-0.290924	0.0780484	-3.72748	0.000193404	0.00253184	Pfkp
ENSMUSG00000064344	10.8722	-2.29766	0.616406	-3.72751	0.000193378	0.00253184	mt-Tm
ENSMUSG00000002603	183.986	0.827384	0.22198	3.72729	0.000193548	0.00253184	Tgfb1
ENSMUSG00000020812	57.5563	0.902228	0.242161	3.72574	0.000194744	0.00254558	1810032O08Rik
ENSMUSG00000018974	958.145	0.367279	0.0985972	3.72505	0.000195277	0.00255066	Sart3
ENSMUSG00000057948	32.5955	1.33379	0.358349	3.72205	0.000197612	0.00257541	Unc13d
ENSMUSG00000030339	181.695	0.735643	0.197633	3.72226	0.000197445	0.00257541	Ltbr
ENSMUSG00000020181	1493.68	-0.409418	0.109997	-3.72208	0.000197589	0.00257541	Nav3
ENSMUSG00000014850	389.076	0.496803	0.1335	3.72138	0.000198135	0.00258031	Msh3
ENSMUSG00000045322	46.6196	1.31298	0.352865	3.7209	0.000198513	0.00258331	Tlr9
ENSMUSG00000064225	1311.98	-0.373494	0.100385	-3.72062	0.000198737	0.00258432	Paqr9
ENSMUSG00000027130	1510.02	-0.282881	0.0760475	-3.7198	0.000199384	0.00259081	Slc12a6
ENSMUSG00000026585	5307.42	-0.364716	0.0980543	-3.71953	0.000199596	0.00259165	Kifap3
ENSMUSG00000041164	4993.17	-0.290658	0.0781589	-3.7188	0.000200169	0.00259717	Zmiz2
ENSMUSG00000036636	1235.62	0.351077	0.0944144	3.71847	0.00020043	0.00259864	Clcn7
ENSMUSG00000058715	216.626	1.47662	0.397176	3.71781	0.000200956	0.00260354	Fcer1g
ENSMUSG00000012519	10.1813	2.81066	0.756083	3.71739	0.000201292	0.00260597	Mlkl
ENSMUSG00000023267	29.3418	1.20242	0.323537	3.71648	0.000202014	0.00261147	Gabrr2
ENSMUSG00000041444	5885.55	-0.375653	0.101076	-3.71655	0.00020196	0.00261147	Arhgap32
ENSMUSG00000022538	369.98	0.43042	0.115842	3.71559	0.000202728	0.00261877	Lsg1
ENSMUSG00000009013	3270.47	-0.365357	0.0983597	-3.7145	0.000203604	0.00262645	Dynll1
ENSMUSG00000024077	1930.73	-0.371906	0.100123	-3.71448	0.000203622	0.00262645	Strn
ENSMUSG00000027134	1525.02	-0.447527	0.120618	-3.71028	0.000207029	0.00266844	Lpcat4
ENSMUSG00000037172	1860.92	-0.336659	0.0907964	-3.70785	0.00020903	0.00269029	E330009J07Rik
ENSMUSG00000069601	6718.43	-0.365696	0.0986234	-3.70801	0.000208896	0.00269029	Ank3
ENSMUSG00000027690	10.4568	2.91807	0.787161	3.70709	0.000209658	0.00269639	Slc2a2
ENSMUSG00000021135	12.7676	2.28271	0.615815	3.70681	0.00020989	0.0026974	Slc10a1
ENSMUSG00000040312	113.743	0.713412	0.192634	3.70345	0.000212685	0.00272901	Cchcr1
ENSMUSG00000031227	3040.72	-0.308352	0.0832641	-3.7033	0.000212815	0.00272901	Magee1
ENSMUSG00000032500	687.524	-0.356442	0.0962496	-3.70331	0.000212804	0.00272901	Dclk3
ENSMUSG00000027605	844.827	-0.300116	0.0810593	-3.70242	0.00021355	0.00273644	Acss2
ENSMUSG00000090210	101.216	0.700132	0.18913	3.70185	0.000214033	0.00274062	Itga10
ENSMUSG00000032946	954.285	-0.506338	0.136823	-3.70069	0.000215012	0.00275115	Rasgrp2
ENSMUSG00000078651	158.334	0.74544	0.201471	3.69999	0.000215608	0.00275676	Aoc2
ENSMUSG00000039850	593.746	0.352655	0.0953233	3.69957	0.000215969	0.00275938	Endov
ENSMUSG00000032532	3672.45	-0.433282	0.117163	-3.6981	0.000217223	0.00277338	Cck
ENSMUSG00000020572	1293.4	0.45265	0.122436	3.69704	0.000218131	0.00278171	Nampt
ENSMUSG00000006740	7110.93	0.313793	0.0848786	3.69697	0.000218192	0.00278171	Kif5b
ENSMUSG00000029151	1391.14	-0.352741	0.0954752	-3.69458	0.000220251	0.00280592	Slc30a3
ENSMUSG00000035004	37.7372	1.30397	0.353224	3.69161	0.000222836	0.0028368	Igsf6
ENSMUSG00000064210	516.102	0.438216	0.118719	3.69119	0.000223208	0.00283948	Ano6
ENSMUSG00000050357	604.724	-0.405366	0.109852	-3.69012	0.000224151	0.00284941	Carmil2
ENSMUSG00000009569	3705.23	-0.385398	0.104458	-3.6895	0.000224697	0.0028531	Mkl2
ENSMUSG00000069094	578.193	-0.424225	0.114984	-3.68942	0.000224766	0.0028531	Pde7a
ENSMUSG00000048040	503.308	-0.401804	0.108966	-3.68742	0.000226541	0.00287355	Arxes2
ENSMUSG00000038576	2160.1	-0.313348	0.0849869	-3.68701	0.000226902	0.00287605	Susd4
ENSMUSG00000027613	731.967	0.429066	0.116446	3.68469	0.000228983	0.00289848	Eif6
ENSMUSG00000036959	439.437	-0.413308	0.11217	-3.68467	0.000229001	0.00289848	Bcorl1
ENSMUSG00000027944	655.546	0.410808	0.111528	3.68344	0.000230103	0.00291033	Hax1
ENSMUSG00000022761	2642.42	-0.230086	0.062474	-3.68292	0.000230581	0.00291428	Lztr1
ENSMUSG00000024211	249.239	-0.530902	0.14417	-3.68247	0.000230983	0.00291726	Grm8
ENSMUSG00000047261	3830.02	-0.24732	0.0671703	-3.68198	0.000231432	0.00292084	Gap43
ENSMUSG00000024620	544.714	0.373348	0.101418	3.68128	0.000232069	0.00292479	Pdgfrb
ENSMUSG00000030616	984.426	-0.311463	0.0846077	-3.68127	0.000232078	0.00292479	Sytl2
ENSMUSG00000037826	1189.58	-0.298948	0.0812442	-3.67962	0.000233584	0.00294165	Ppm1k
ENSMUSG00000071713	53.7606	2.41036	0.655139	3.67916	0.000234006	0.00294485	Csf2rb
ENSMUSG00000087006	623.36	0.546735	0.148633	3.67842	0.000234686	0.00294919	Gm13889
ENSMUSG00000045534	149.695	-0.551939	0.150047	-3.67843	0.000234672	0.00294919	Kcna5
ENSMUSG00000026831	57.3335	1.0636	0.28924	3.67722	0.000235787	0.00296091	1700007K13Rik
ENSMUSG00000039275	2073.08	-0.268163	0.0729403	-3.67647	0.000236483	0.00296753	Foxk2
ENSMUSG00000027293	404.211	0.612448	0.166706	3.67383	0.000238944	0.00299627	Ehd4
ENSMUSG00000004936	4620.88	-0.227319	0.0618871	-3.67311	0.000239612	0.003001	Map2k1
ENSMUSG00000037640	712.765	-0.367409	0.100028	-3.67306	0.000239663	0.003001	Zfp60
ENSMUSG00000028161	20484.8	-0.35766	0.0973803	-3.67282	0.000239887	0.00300166	Ppp3ca
ENSMUSG00000044835	1058.99	-0.276905	0.0754098	-3.67201	0.000240655	0.00300913	Ankrd45
ENSMUSG00000013495	542.163	-0.358134	0.0975732	-3.67041	0.00024216	0.00302579	Tmem175
ENSMUSG00000027398	10.078	2.27316	0.619421	3.66982	0.000242724	0.00303068	Il1b
ENSMUSG00000046410	127.995	0.887207	0.241776	3.66954	0.000242987	0.00303182	Kcnk6
ENSMUSG00000036438	18137.2	-0.337773	0.0920726	-3.66855	0.000243933	0.00304146	Calm2
ENSMUSG00000002870	94.8224	0.961822	0.262338	3.66634	0.000246048	0.00306483	Mcm2
ENSMUSG00000042997	339.068	0.55231	0.15065	3.66619	0.000246189	0.00306483	Nhlrc3
ENSMUSG00000027797	13443.7	-0.363962	0.0992791	-3.66604	0.000246331	0.00306483	Dclk1
ENSMUSG00000028480	121.873	1.00188	0.273407	3.66443	0.000247892	0.00308208	Glipr2
ENSMUSG00000008090	405.092	0.629464	0.171831	3.66326	0.000249022	0.00309393	Fgfrl1
ENSMUSG00000021071	6019.14	-0.32332	0.0882725	-3.66276	0.000249517	0.00309788	Trim9
ENSMUSG00000027684	55.7845	1.01196	0.276356	3.66182	0.000250434	0.00310708	Mecom
ENSMUSG00000006313	24.8746	1.72061	0.469953	3.66123	0.000251007	0.00311199	Upk1a
ENSMUSG00000053318	14.2295	2.23992	0.611992	3.66005	0.000252168	0.00311978	Slamf8
ENSMUSG00000047250	277.161	0.6054	0.165394	3.66036	0.000251861	0.00311978	Ptgs1
ENSMUSG00000055078	1161.99	-0.350766	0.0958347	-3.66012	0.000252099	0.00311978	Gabra5
ENSMUSG00000055053	2333.19	-0.23278	0.0636108	-3.65943	0.000252774	0.00312508	Nfic
ENSMUSG00000037855	8681.5	-0.359836	0.0983769	-3.65773	0.000254462	0.00314373	Zfp365
ENSMUSG00000010592	56.4984	-0.883995	0.241693	-3.65751	0.000254672	0.00314412	Dazl
ENSMUSG00000108181	61.7471	-0.85814	0.234678	-3.65666	0.00025552	0.00315237	C030015A19Rik
ENSMUSG00000030172	753.013	-0.388764	0.106323	-3.65646	0.000255723	0.00315266	Erc1
ENSMUSG00000071862	1252.83	-0.366236	0.100198	-3.65511	0.000257068	0.00316702	Lrrtm2
ENSMUSG00000026179	2878.51	-0.308974	0.0845478	-3.65444	0.000257749	0.00317318	Pnkd
ENSMUSG00000047379	1821.59	-0.290011	0.0793826	-3.65334	0.000258856	0.00318458	B4gat1
ENSMUSG00000047606	269.92	-0.450513	0.123336	-3.65273	0.000259467	0.00318987	Ankrd34c
ENSMUSG00000062825	10504.5	-0.213368	0.0584671	-3.64936	0.00026289	0.00322742	Actg1
ENSMUSG00000039671	2789.96	-0.244013	0.0668638	-3.64941	0.000262846	0.00322742	Zmynd8
ENSMUSG00000034485	241.812	0.530061	0.145263	3.64897	0.000263295	0.00323015	Uaca
ENSMUSG00000030956	857.146	-0.321035	0.0880167	-3.64743	0.000264873	0.00324723	Fam53b
ENSMUSG00000041115	3061.21	-0.373247	0.102351	-3.64672	0.000265609	0.00325399	Iqsec2
ENSMUSG00000018736	1743.44	0.261426	0.0717046	3.64587	0.000266486	0.00326246	Ndel1
ENSMUSG00000024998	456.518	0.575647	0.157915	3.6453	0.000267079	0.00326517	Plce1
ENSMUSG00000027210	2454.28	-0.465084	0.127582	-3.64538	0.000267001	0.00326517	Meis2
ENSMUSG00000038418	10088.6	0.814921	0.223702	3.64288	0.000269602	0.0032926	Egr1
ENSMUSG00000047085	3575.26	-0.29718	0.0815802	-3.64279	0.000269698	0.0032926	Lrrc4b
ENSMUSG00000027422	1109.5	0.462227	0.126915	3.64202	0.000270503	0.00330013	Rrbp1
ENSMUSG00000018398	5644.12	-0.229659	0.0630614	-3.64183	0.000270706	0.00330032	Septin8
ENSMUSG00000038094	331.398	0.547432	0.150527	3.63678	0.000276071	0.0033634	Atp13a4
ENSMUSG00000038024	476.288	0.35312	0.0971146	3.63612	0.000276775	0.00336573	Dennd4c
ENSMUSG00000032735	733.473	-0.441706	0.121479	-3.63606	0.000276837	0.00336573	Ablim3
ENSMUSG00000019906	359.478	-0.520698	0.143204	-3.63607	0.000276833	0.00336573	Lin7a
ENSMUSG00000093865	10.5227	2.7145	0.746693	3.63537	0.000277585	0.00337248	Lrit3
ENSMUSG00000004383	2366.54	-0.284394	0.0782773	-3.63316	0.00027997	0.00339911	Large1
ENSMUSG00000029472	3329.54	-0.26039	0.0716973	-3.63179	0.000281464	0.00341489	Anapc5
ENSMUSG00000033419	6645.15	-0.312466	0.086045	-3.63143	0.000281857	0.00341729	Snap91
ENSMUSG00000032508	124.813	0.831599	0.229064	3.63042	0.000282964	0.00342835	Myd88
ENSMUSG00000058743	54.6091	1.07386	0.295834	3.62995	0.00028348	0.00342988	Kcnj14
ENSMUSG00000020431	11650.7	-0.459888	0.126691	-3.63	0.000283426	0.00342988	Adcy1
ENSMUSG00000025912	132.421	1.0839	0.298642	3.62944	0.000284042	0.00343431	Mybl1
ENSMUSG00000029757	1967.14	-0.304829	0.0840029	-3.6288	0.000284747	0.00344047	Dync1i1
ENSMUSG00000044258	50.4551	0.932354	0.256982	3.62809	0.000285528	0.00344753	Ctla2a
ENSMUSG00000044847	598.532	-0.41195	0.113574	-3.62714	0.000286576	0.00345781	Lsm11
ENSMUSG00000024197	315.489	0.474497	0.130858	3.62605	0.000287788	0.00347005	Plin3
ENSMUSG00000003814	5271.92	-0.256281	0.0707182	-3.62398	0.000290106	0.0034956	Calr
ENSMUSG00000018654	118.065	1.00124	0.276405	3.62239	0.000291894	0.00351474	Ikzf1
ENSMUSG00000021583	265.194	0.805919	0.222509	3.62197	0.000292371	0.00351806	Erap1
ENSMUSG00000036760	2101.27	-0.374149	0.103314	-3.62146	0.000292941	0.00352251	Kcnk9
ENSMUSG00000036181	624.807	1.08829	0.300623	3.62012	0.000294461	0.00353837	Hist1h1c
ENSMUSG00000022517	4083.38	-0.238131	0.0658108	-3.61841	0.000296417	0.00355759	Mgrn1
ENSMUSG00000026825	21354.6	-0.290879	0.0803935	-3.61819	0.000296668	0.00355759	Dnm1
ENSMUSG00000031224	146.677	-0.571079	0.157829	-3.61833	0.000296509	0.00355759	Magee2
ENSMUSG00000111692	12.1024	2.19093	0.605627	3.61763	0.000297312	0.00356288	Gm49373
ENSMUSG00000023017	1531.3	-0.29265	0.0809174	-3.61665	0.000298438	0.00357393	Asic1
ENSMUSG00000038949	1110.04	-0.332154	0.0918465	-3.61641	0.000298722	0.00357439	Cnst
ENSMUSG00000062393	169.923	-0.651681	0.180208	-3.61627	0.000298884	0.00357439	Dgkk
ENSMUSG00000040463	1181.11	0.319396	0.0883298	3.61595	0.00029925	0.00357634	Mybbp1a
ENSMUSG00000027399	14.4159	1.74251	0.48199	3.61525	0.000300063	0.00358362	Il1a
ENSMUSG00000103382	29.2444	1.36465	0.377509	3.61488	0.000300488	0.00358626	Gm37755
ENSMUSG00000032968	450.624	-0.491579	0.136033	-3.61367	0.000301894	0.00360059	Inha
ENSMUSG00000036158	1648.53	-0.313731	0.0868313	-3.61312	0.00030254	0.00360585	Prickle1
ENSMUSG00000085829	81.8934	0.823616	0.228159	3.60984	0.00030639	0.00364926	Gm4285
ENSMUSG00000079057	162.411	0.623471	0.172726	3.60959	0.000306684	0.00365028	Cyp4v3
ENSMUSG00000037727	433.062	0.743396	0.206014	3.60847	0.000308012	0.00366361	Avp
ENSMUSG00000044595	53.7597	1.1333	0.314212	3.60679	0.00031001	0.00368489	Dnd1
ENSMUSG00000004085	245.324	0.632698	0.175552	3.60405	0.0003133	0.00371703	Map3k20
ENSMUSG00000040675	275.057	0.482167	0.133776	3.60428	0.000313025	0.00371703	Mthfd1l
ENSMUSG00000015709	5496.36	-0.206937	0.057419	-3.60398	0.000313385	0.00371703	Arnt2
ENSMUSG00000031016	424.322	-0.448307	0.124397	-3.60383	0.000313561	0.00371703	Wee1
ENSMUSG00000028033	1362.65	-0.447675	0.12426	-3.60273	0.000314895	0.00373033	Kcnq5
ENSMUSG00000031242	1209.96	-0.369953	0.10274	-3.60088	0.000317139	0.00375438	2610002M06Rik
ENSMUSG00000065954	3799.96	-0.280551	0.0779163	-3.60067	0.000317397	0.0037549	Tacc1
ENSMUSG00000061576	4976.95	-0.274591	0.0762766	-3.59994	0.000318292	0.00376295	Dpp6
ENSMUSG00000048779	79.9196	1.05629	0.293464	3.59938	0.000318971	0.00376845	P2ry6
ENSMUSG00000027074	57.6767	1.60703	0.446556	3.59872	0.000319793	0.00377562	Slc43a3
ENSMUSG00000029249	202.508	0.73825	0.20531	3.59578	0.000323425	0.00381594	Rest
ENSMUSG00000044912	1236.93	-0.404392	0.112487	-3.59502	0.000324367	0.00382449	Syt16
ENSMUSG00000113852	262.291	-0.486151	0.135278	-3.59371	0.000326007	0.00384124	Gm48062
ENSMUSG00000011179	1423.12	0.408068	0.113587	3.59257	0.000327436	0.00385528	Odc1
ENSMUSG00000029009	681.268	0.38323	0.106678	3.59241	0.000327637	0.00385528	Mthfr
ENSMUSG00000092203	163.667	0.684479	0.190799	3.58744	0.000333941	0.00392683	1110038B12Rik
ENSMUSG00000112110	33.6376	1.21693	0.339239	3.58723	0.00033421	0.00392736	AC158605.1
ENSMUSG00000031285	731.615	-0.495667	0.138197	-3.58667	0.00033493	0.00393319	Dcx
ENSMUSG00000042190	78.1931	0.934363	0.260602	3.58541	0.000336553	0.00394961	Cmklr1
ENSMUSG00000039976	1045.35	-0.355915	0.0992821	-3.58488	0.000337232	0.00395494	Tbc1d16
ENSMUSG00000038257	310.475	-0.480614	0.13412	-3.58345	0.00033908	0.00397396	Glra3
ENSMUSG00000048895	5912.32	-0.296588	0.0828181	-3.5812	0.000342023	0.00400577	Cdk5r1
ENSMUSG00000020806	50.6829	0.918664	0.256608	3.58004	0.000343545	0.00401824	Rhbdf2
ENSMUSG00000040537	4108.6	-0.337298	0.0942142	-3.58012	0.000343435	0.00401824	Adam22
ENSMUSG00000037894	1482.48	0.364702	0.101925	3.57813	0.000346067	0.00404504	H2afz
ENSMUSG00000019795	3018.52	-0.232066	0.0648704	-3.57738	0.000347055	0.00405227	Pcmt1
ENSMUSG00000035781	2416.8	-0.392303	0.109664	-3.57731	0.000347147	0.00405227	R3hdm4
ENSMUSG00000030775	17.0699	1.82299	0.509654	3.57691	0.000347674	0.00405574	Trat1
ENSMUSG00000031995	29.8134	1.72718	0.482899	3.5767	0.000347965	0.00405643	St14
ENSMUSG00000074340	91.7284	0.866242	0.242219	3.57628	0.000348525	0.00406014	Ovgp1
ENSMUSG00000022415	9064.53	-0.341846	0.0955916	-3.57611	0.000348745	0.00406014	Syngr1
ENSMUSG00000023192	955.909	-0.385478	0.107868	-3.57363	0.000352068	0.00409612	Grm2
ENSMUSG00000052415	195.544	0.56027	0.156858	3.57184	0.000354487	0.00412153	Tchh
ENSMUSG00000025511	257.985	0.476789	0.133509	3.57121	0.00035533	0.0041286	Tspan4
ENSMUSG00000031530	449.563	0.405017	0.113442	3.57026	0.000356624	0.0041409	Dusp4
ENSMUSG00000073374	62.828	0.818904	0.229433	3.56925	0.000358009	0.00415423	C030034I22Rik
ENSMUSG00000042428	3357.8	-0.226055	0.0633442	-3.56867	0.0003588	0.00415818	Mgat3
ENSMUSG00000022454	8091.42	-0.263492	0.0738352	-3.56865	0.000358823	0.00415818	Nell2
ENSMUSG00000042759	24.4218	1.61864	0.453633	3.56817	0.00035949	0.00416317	Apobr
ENSMUSG00000026380	166.668	0.712558	0.199768	3.56693	0.000361182	0.00418001	Tfcp2l1
ENSMUSG00000001833	6173.87	-0.40088	0.112407	-3.56634	0.000362004	0.00418676	Septin7
ENSMUSG00000019796	3253.81	-0.248294	0.0696853	-3.56307	0.000366544	0.00423648	Lrp11
ENSMUSG00000020390	2654.29	-0.298192	0.0837529	-3.56038	0.000370323	0.00427734	Ube2b
ENSMUSG00000017861	30.7032	1.31096	0.368245	3.56002	0.000370831	0.0042804	Mybl2
ENSMUSG00000079419	15.3954	1.82212	0.511928	3.55933	0.000371809	0.00428282	Ms4a6c
ENSMUSG00000027824	25.8886	1.37116	0.385265	3.55901	0.00037226	0.00428282	Vmn2r1
ENSMUSG00000037253	958.889	0.355089	0.099772	3.55901	0.000372255	0.00428282	Mex3c
ENSMUSG00000048175	771.57	-0.28904	0.0812135	-3.55901	0.000372252	0.00428282	Asb8
ENSMUSG00000035864	23495.8	-0.345338	0.0970174	-3.55954	0.000371499	0.00428282	Syt1
ENSMUSG00000022548	4139.96	0.816126	0.229335	3.55866	0.000372753	0.00428568	Apod
ENSMUSG00000037318	20.9208	1.8847	0.529731	3.55784	0.000373923	0.00429632	Traf3ip3
ENSMUSG00000027525	2271.91	-0.249691	0.0701943	-3.55713	0.000374925	0.00430503	Phactr3
ENSMUSG00000079227	108.045	0.771678	0.216996	3.55619	0.000376268	0.00431763	Ccr5
ENSMUSG00000030814	364.58	0.390847	0.109995	3.5533	0.000380429	0.00436252	Bcl7c
ENSMUSG00000033688	13.3762	1.7788	0.500928	3.55102	0.000383742	0.00439764	1300017J02Rik
ENSMUSG00000036309	5188.25	-0.240797	0.0678208	-3.5505	0.000384507	0.00440354	Skp1a
ENSMUSG00000045817	705.829	0.411999	0.116076	3.5494	0.000386108	0.00441899	Zfp36l2
ENSMUSG00000009075	907.215	-0.402965	0.11354	-3.54912	0.000386526	0.00442089	Cabp7
ENSMUSG00000048865	82.7993	0.850914	0.239863	3.5475	0.000388902	0.00444386	Arhgap30
ENSMUSG00000027849	861.968	-0.477543	0.134617	-3.54741	0.00038904	0.00444386	Syt6
ENSMUSG00000031166	3604.35	-0.324196	0.0914538	-3.54492	0.000392737	0.00448318	Wdr13
ENSMUSG00000028557	4367.11	-0.236562	0.0667405	-3.5445	0.00039336	0.00448737	Rnf11
ENSMUSG00000051851	1337.98	-0.380018	0.107229	-3.54398	0.000394129	0.00449323	Rtl8c
ENSMUSG00000040345	27.2475	1.25302	0.353583	3.54377	0.000394446	0.00449392	Arhgap9
ENSMUSG00000035847	8523.5	-0.348629	0.0984091	-3.54265	0.000396126	0.00451014	Ids
ENSMUSG00000026288	347.306	0.687795	0.194223	3.54126	0.000398215	0.00453098	Inpp5d
ENSMUSG00000003153	2821.52	-0.306815	0.086651	-3.54082	0.000398887	0.00453569	Slc2a3
ENSMUSG00000029915	45.86	1.34004	0.378864	3.53699	0.000404711	0.00459597	Clec5a
ENSMUSG00000029925	67.3505	1.18465	0.334926	3.53707	0.000404599	0.00459597	Tbxas1
ENSMUSG00000001962	393.373	0.436717	0.123534	3.5352	0.000407474	0.00462436	Fam50a
ENSMUSG00000109015	35.8682	1.25293	0.354482	3.53454	0.000408487	0.00463286	Gm31024
ENSMUSG00000025380	12.0648	2.09768	0.593547	3.53414	0.000409103	0.0046363	Fscn2
ENSMUSG00000048279	1628.28	-0.377235	0.106744	-3.534	0.000409318	0.0046363	Sacs
ENSMUSG00000032536	3950.16	-0.22647	0.0640999	-3.53308	0.000410751	0.00464953	Trak1
ENSMUSG00000035530	4955.82	0.198448	0.0561792	3.53241	0.000411797	0.00465837	Eif1
ENSMUSG00000042763	1009.93	-0.28905	0.0818391	-3.53193	0.000412543	0.00466381	Maneal
ENSMUSG00000041263	1448.7	-0.285331	0.0807974	-3.53143	0.000413318	0.00466956	Rusc1
ENSMUSG00000027800	272.956	0.480604	0.136136	3.53031	0.000415075	0.0046864	Tm4sf1
ENSMUSG00000073147	338.509	0.441701	0.125154	3.52926	0.00041673	0.00470206	5031425E22Rik
ENSMUSG00000029335	266.676	-0.538225	0.152553	-3.52811	0.000418544	0.0047195	Bmp3
ENSMUSG00000028266	2434.5	-0.35777	0.101436	-3.52704	0.000420229	0.00473546	Lmo4
ENSMUSG00000036833	363.454	0.563266	0.159761	3.52569	0.000422388	0.00475673	Pnpla7
ENSMUSG00000028979	23.151	1.55753	0.441884	3.52476	0.000423869	0.00477036	Masp2
ENSMUSG00000050558	90.4592	-0.732037	0.207813	-3.52257	0.000427379	0.00480679	Prokr2
ENSMUSG00000042510	73.2062	0.803394	0.228087	3.52231	0.000427798	0.00480842	AA986860
ENSMUSG00000050930	105.424	0.718179	0.203978	3.52087	0.000430138	0.00482953	Map10
ENSMUSG00000029108	2123.15	-0.266679	0.0757435	-3.52081	0.000430226	0.00482953	Pcdh7
ENSMUSG00000037126	7408.15	-0.42226	0.119948	-3.52034	0.000430987	0.00483498	Psd
ENSMUSG00000032598	1437.36	-0.260204	0.073942	-3.51903	0.000433124	0.00485585	Nckipsd
ENSMUSG00000050511	332.581	-0.510536	0.145191	-3.51631	0.000437592	0.00490282	Oprd1
ENSMUSG00000096054	7796.42	-0.323251	0.0919766	-3.51449	0.000440605	0.00493343	Syne1
ENSMUSG00000022324	389.342	-0.403034	0.114695	-3.51395	0.000441497	0.00494027	Matn2
ENSMUSG00000004151	1488.23	-0.360851	0.102712	-3.51323	0.000442702	0.0049506	Etv1
ENSMUSG00000105552	24.8975	1.22957	0.350127	3.51179	0.000445104	0.00497429	Gm19710
ENSMUSG00000001249	50.3617	1.04698	0.29821	3.51088	0.000446621	0.00498491	Hpn
ENSMUSG00000018849	1913.42	-0.260335	0.0741506	-3.5109	0.0004466	0.00498491	Wwc1
ENSMUSG00000046027	195.919	0.49783	0.141903	3.50824	0.000451088	0.00503157	Stard5
ENSMUSG00000025551	643.575	-0.379558	0.108203	-3.50784	0.000451766	0.00503592	Fgf14
ENSMUSG00000000409	47.4561	1.00266	0.285866	3.50744	0.000452445	0.0050403	Lck
ENSMUSG00000036745	5044.49	-0.34663	0.098837	-3.50709	0.000453042	0.00504375	Ttll7
ENSMUSG00000024066	254.456	0.761852	0.217262	3.5066	0.000453867	0.00504974	Xdh
ENSMUSG00000032232	481.931	0.34817	0.0992971	3.50635	0.000454299	0.00505135	Cgnl1
ENSMUSG00000064065	1246.21	-0.909638	0.25946	-3.50589	0.000455081	0.00505684	Ipcef1
ENSMUSG00000022623	4941.28	-0.405554	0.115708	-3.50498	0.000456635	0.0050709	Shank3
ENSMUSG00000030096	2923.27	0.297776	0.0849809	3.50403	0.000458266	0.00508579	Slc6a6
ENSMUSG00000030695	23734.5	-0.292493	0.0835291	-3.50169	0.000462314	0.00512425	Aldoa
ENSMUSG00000008153	7722.73	-0.292967	0.083663	-3.50174	0.000462222	0.00512425	Clstn3
ENSMUSG00000024949	3677.84	0.230123	0.0657224	3.50144	0.000462759	0.00512595	Sf1
ENSMUSG00000054520	112.275	0.817929	0.233612	3.50123	0.000463111	0.00512661	Sh3bp2
ENSMUSG00000079481	1216.3	-0.425037	0.121419	-3.50057	0.00046426	0.00513609	Nhsl2
ENSMUSG00000031875	191.792	0.631725	0.180619	3.49756	0.000469542	0.00518474	Cmtm3
ENSMUSG00000041986	3640.15	-0.30472	0.0871183	-3.49777	0.000469168	0.00518474	Elmod1
ENSMUSG00000102543	1410.57	-0.410226	0.117285	-3.49768	0.000469324	0.00518474	Pcdhgc5
ENSMUSG00000043872	301.026	-0.458366	0.131141	-3.49522	0.000473663	0.00522696	Zmym1
ENSMUSG00000048027	1617.77	-0.227752	0.0652018	-3.49302	0.000477583	0.00526691	Rgmb
ENSMUSG00000038612	1652.31	0.293379	0.0840697	3.48972	0.000483534	0.00532918	Mcl1
ENSMUSG00000046062	1413.69	0.263761	0.0756048	3.48868	0.000485413	0.00534654	Ppp1r15b
ENSMUSG00000056917	438.5	0.417795	0.119787	3.48782	0.000486977	0.0053604	Sipa1
ENSMUSG00000055044	116.742	-0.653925	0.187573	-3.48625	0.000489846	0.00538861	Pdlim1
ENSMUSG00000030329	3014.92	-0.283055	0.0812179	-3.48512	0.000491908	0.00540791	Pianp
ENSMUSG00000031343	2115.9	-0.423604	0.121655	-3.48201	0.000497668	0.00546781	Gabra3
ENSMUSG00000037455	345.296	-0.408345	0.117314	-3.48077	0.000499967	0.00548964	Slc18b1
ENSMUSG00000020102	682.208	-0.486785	0.139908	-3.47931	0.000502705	0.00551625	Slc16a7
ENSMUSG00000028096	448.203	-0.344646	0.0990853	-3.47828	0.00050465	0.00553414	Gpr89
ENSMUSG00000029166	3547.37	-0.249564	0.0717725	-3.47715	0.000506769	0.00555045	Mapre3
ENSMUSG00000057469	779.26	-0.26536	0.0763129	-3.47727	0.000506553	0.00555045	E2f6
ENSMUSG00000022817	1076.69	0.584641	0.16815	3.47691	0.000507235	0.00555209	Itgb5
ENSMUSG00000041328	973.87	0.359213	0.103353	3.4756	0.000509713	0.00557574	Pcf11
ENSMUSG00000003378	4216.54	-0.282788	0.0813767	-3.47504	0.00051077	0.00558383	Grik5
ENSMUSG00000021242	1248.76	0.442911	0.127466	3.47474	0.000511343	0.00558661	Npc2
ENSMUSG00000043993	93.3285	0.835729	0.240618	3.47325	0.000514193	0.00561426	2900052L18Rik
ENSMUSG00000000202	452.041	-0.428941	0.123504	-3.47308	0.000514522	0.00561436	Btbd17
ENSMUSG00000030220	138.378	0.63706	0.183458	3.4725	0.000515632	0.00562298	Arhgdib
ENSMUSG00000023274	84.1742	-1.04099	0.299805	-3.47222	0.000516175	0.00562541	Cd4
ENSMUSG00000041193	54.6079	0.907898	0.26164	3.47002	0.000520421	0.00566816	Pla2g5
ENSMUSG00000045009	1056.05	-0.414792	0.119548	-3.46967	0.000521099	0.00567204	Prrt3
ENSMUSG00000028581	936.665	1.13172	0.326193	3.46948	0.000521475	0.00567261	Laptm5
ENSMUSG00000043962	2376.93	0.236521	0.0681953	3.46828	0.000523792	0.0056943	Thrap3
ENSMUSG00000024805	679.756	0.383263	0.110517	3.46791	0.000524529	0.00569878	Pcgf5
ENSMUSG00000024462	12974.5	-0.226191	0.0652395	-3.46709	0.000526134	0.00571269	Gabbr1
ENSMUSG00000039372	436.027	-0.390982	0.112789	-3.4665	0.000527282	0.00572161	Marchf4
ENSMUSG00000026782	3352.43	-0.392317	0.113222	-3.46501	0.000530211	0.00573939	Abi2
ENSMUSG00000055540	273.742	-0.432252	0.124748	-3.465	0.000530228	0.00573939	Epha6
ENSMUSG00000055373	1981.66	-0.467367	0.134871	-3.46528	0.000529682	0.00573939	Fut9
ENSMUSG00000032257	15.4784	-1.67349	0.482946	-3.46517	0.000529904	0.00573939	Ankk1
ENSMUSG00000023915	1890.59	-0.303875	0.0877025	-3.46483	0.000530563	0.00573949	Tnfrsf21
ENSMUSG00000022865	632.885	0.352351	0.101735	3.46342	0.000533356	0.00575608	Cxadr
ENSMUSG00000025153	5952.72	-0.219333	0.0633287	-3.46341	0.000533377	0.00575608	Fasn
ENSMUSG00000026614	390.161	-0.381453	0.110138	-3.46339	0.000533407	0.00575608	Slc30a10
ENSMUSG00000041592	641.891	-0.403875	0.116601	-3.46374	0.000532723	0.00575608	Sdk2
ENSMUSG00000040747	155.468	0.91237	0.263456	3.46308	0.000534032	0.00575928	Cd53
ENSMUSG00000042523	2321.58	-0.376004	0.108655	-3.46052	0.000539138	0.00581078	Dnal1
ENSMUSG00000027848	520.767	1.22767	0.355041	3.45781	0.000544583	0.00586418	Olfml3
ENSMUSG00000027951	3522.78	0.203244	0.0587798	3.45772	0.00054476	0.00586418	Adar
ENSMUSG00000095690	281.313	-0.451066	0.130472	-3.45719	0.000545834	0.00587215	Rab11b-ps2
ENSMUSG00000029810	540.113	0.565865	0.163698	3.45675	0.000546727	0.00587815	Tmem176b
ENSMUSG00000020599	1145.66	-0.536901	0.155419	-3.45454	0.000551227	0.00592291	Rgs9
ENSMUSG00000045912	294.06	-0.478099	0.138412	-3.45418	0.000551964	0.0059272	C2cd4c
ENSMUSG00000051504	303.12	0.686176	0.198667	3.45389	0.000552557	0.00592994	Siglech
ENSMUSG00000037703	3767.01	-0.383664	0.111141	-3.45205	0.00055634	0.0059669	Lzts3
ENSMUSG00000050668	506.484	-0.364485	0.105608	-3.4513	0.000557885	0.00597981	Gpatch11
ENSMUSG00000025278	1811.5	0.261455	0.0757669	3.45078	0.000558978	0.00598788	Flnb
ENSMUSG00000085331	17.1266	2.22178	0.643881	3.45061	0.000559321	0.00598791	Gm11274
ENSMUSG00000035873	73.4864	0.831043	0.240915	3.44953	0.00056157	0.00600832	Pawr
ENSMUSG00000027936	564.457	0.380548	0.110332	3.44912	0.000562422	0.00601378	Crtc2
ENSMUSG00000024640	2367.12	0.314759	0.0912626	3.44894	0.000562792	0.00601407	Psat1
ENSMUSG00000022488	289.335	0.621548	0.180236	3.44852	0.000563659	0.00601967	Nckap1l
ENSMUSG00000038855	1159.03	0.387454	0.112381	3.44769	0.000565399	0.00603459	Itpkb
ENSMUSG00000033491	58.3894	-0.847224	0.245759	-3.44737	0.000566074	0.00603812	Prss35
ENSMUSG00000000861	1393.71	-0.344936	0.100082	-3.44654	0.000567824	0.00605312	Bcl11a
ENSMUSG00000078607	104.768	0.606992	0.176199	3.44493	0.000571202	0.00608543	1810010H24Rik
ENSMUSG00000037376	574.446	0.340008	0.098775	3.44225	0.000576904	0.00614246	Trmt6
ENSMUSG00000032060	1589.23	-0.410593	0.119289	-3.44201	0.0005774	0.00614401	Cryab
ENSMUSG00000022822	3906.39	-0.260048	0.0756088	-3.43939	0.000583029	0.0061964	Abcc5
ENSMUSG00000027624	10216	-0.283948	0.0825572	-3.43942	0.000582971	0.0061964	Epb41l1
ENSMUSG00000073293	435.085	-0.345101	0.100348	-3.43905	0.000583753	0.00620035	Nudt10
ENSMUSG00000042589	1365.38	-0.265287	0.0771622	-3.43804	0.000585943	0.00621985	Cux2
ENSMUSG00000002699	67.2089	0.975314	0.283727	3.43751	0.000587089	0.00622825	Lcp2
ENSMUSG00000031652	1527.6	0.322864	0.093947	3.43666	0.000588927	0.00624398	N4bp1
ENSMUSG00000008398	181.868	0.701994	0.204306	3.43599	0.000590395	0.00625576	Elk3
ENSMUSG00000004677	1551.96	0.250675	0.0729773	3.43498	0.000592606	0.00627422	Myo9b
ENSMUSG00000031748	12457.3	-0.233351	0.0679361	-3.43486	0.000592851	0.00627422	Gnao1
ENSMUSG00000029361	1247.82	-0.269706	0.0785687	-3.43274	0.000597514	0.00631976	Nos1
ENSMUSG00000043881	828.105	-0.318697	0.0928478	-3.43247	0.00059812	0.00632237	Kbtbd7
ENSMUSG00000022951	1184.41	0.346776	0.101039	3.43211	0.000598903	0.00632684	Rcan1
ENSMUSG00000026335	3681.62	-0.246485	0.0718304	-3.43148	0.000600297	0.00633775	Pam
ENSMUSG00000070570	15634.1	-0.355169	0.103553	-3.42983	0.000603955	0.00637255	Slc17a7
ENSMUSG00000038811	29.5733	1.1882	0.346448	3.42967	0.000604325	0.00637261	Gngt2
ENSMUSG00000020321	11565.7	-0.227097	0.0662601	-3.42736	0.000609479	0.00642311	Mdh1
ENSMUSG00000053113	84.3361	0.839259	0.244946	3.42631	0.000611844	0.00644417	Socs3
ENSMUSG00000050721	288.589	0.502086	0.146568	3.42561	0.000613419	0.00645689	Plekho2
ENSMUSG00000022146	207.824	1.55681	0.454516	3.42521	0.00061433	0.00646261	Osmr
ENSMUSG00000017417	495.281	-0.365513	0.106735	-3.42448	0.000615986	0.00647614	Plxdc1
ENSMUSG00000027737	1147.02	0.361324	0.105538	3.42365	0.000617859	0.00649195	Slc7a11
ENSMUSG00000036570	449.405	0.598567	0.174874	3.42285	0.000619677	0.00650716	Fxyd1
ENSMUSG00000074578	347.346	0.401237	0.117242	3.42231	0.000620919	0.00651631	Zfas1
ENSMUSG00000039480	64.8008	0.762525	0.222854	3.42164	0.000622455	0.00652643	Nt5dc1
ENSMUSG00000049755	534.13	-0.331846	0.0969868	-3.42156	0.000622627	0.00652643	Zfp672
ENSMUSG00000021910	9596.36	-0.188793	0.0551886	-3.42087	0.000624212	0.00653136	Nisch
ENSMUSG00000018401	1893.41	-0.306445	0.0895775	-3.42101	0.000623898	0.00653136	Mtmr4
ENSMUSG00000086040	2795.98	-0.334954	0.0979133	-3.42092	0.000624088	0.00653136	Wipf3
ENSMUSG00000028821	720.692	0.417114	0.121981	3.41951	0.00062735	0.00656029	Syf2
ENSMUSG00000043498	790.749	-0.422476	0.123667	-3.41624	0.000634916	0.00663546	9330132A10Rik
ENSMUSG00000040997	1488.77	0.416279	0.121868	3.41583	0.000635884	0.00663889	Abhd4
ENSMUSG00000026923	621.733	0.301779	0.0883486	3.41578	0.000636	0.00663889	Notch1
ENSMUSG00000048481	430.676	-0.441035	0.12916	-3.41465	0.000638639	0.00666247	Mypop
ENSMUSG00000039801	1447.27	0.28469	0.0834009	3.41352	0.000641296	0.00668622	Cplane1
ENSMUSG00000042228	232.53	0.802978	0.235303	3.41252	0.000643643	0.00670671	Lyn
ENSMUSG00000023224	229.249	0.798647	0.234057	3.41219	0.000644423	0.00671087	Serping1
ENSMUSG00000039013	25.3889	2.03438	0.596342	3.41142	0.000646248	0.00672588	Siglecf
ENSMUSG00000024642	1122.28	-0.31739	0.0931224	-3.40831	0.000653659	0.00679898	Tle4
ENSMUSG00000042396	570.468	0.411774	0.120833	3.4078	0.00065489	0.00680775	Rbm7
ENSMUSG00000010067	159.639	0.601457	0.176513	3.40744	0.000655761	0.00680875	Rassf1
ENSMUSG00000085148	428.878	0.383865	0.112651	3.40755	0.000655482	0.00680875	Mir22hg
ENSMUSG00000054162	2172.53	-0.292491	0.0858797	-3.40582	0.000659652	0.00684232	Spock3
ENSMUSG00000024670	28.5681	-1.45769	0.428007	-3.40577	0.000659773	0.00684232	Cd6
ENSMUSG00000025355	24.9089	1.26783	0.372362	3.40484	0.000662039	0.00686177	Mmp19
ENSMUSG00000040640	2426.9	-0.400975	0.117794	-3.40404	0.000663965	0.00687768	Erc2
ENSMUSG00000074252	70.4712	0.922387	0.271056	3.40294	0.000666661	0.00690153	Gm10654
ENSMUSG00000031703	3747.31	-0.325965	0.0958209	-3.40181	0.00066941	0.00692591	Itfg1
ENSMUSG00000041130	1062.84	0.317201	0.0933001	3.39979	0.000674373	0.00697315	Zfp598
ENSMUSG00000028954	1409.34	0.264355	0.0777721	3.39909	0.0006761	0.0069869	Nub1
ENSMUSG00000042156	1259.21	-0.23872	0.0702419	-3.39854	0.00067746	0.00699684	Dzip1
ENSMUSG00000036437	399.326	-0.446319	0.131356	-3.39779	0.000679327	0.007012	Npy1r
ENSMUSG00000099583	27.0091	1.70079	0.501023	3.39464	0.000687182	0.00708475	Hist1h3d
ENSMUSG00000108358	544.909	-0.39476	0.116286	-3.39472	0.000686976	0.00708475	Gm44509
ENSMUSG00000095675	15.3292	2.08977	0.615888	3.3931	0.000691058	0.00712053	Ccl21b
ENSMUSG00000019977	938.865	0.318107	0.0937767	3.39218	0.000693398	0.00714046	Hbs1l
ENSMUSG00000039105	1318.2	0.339832	0.100199	3.39158	0.000694898	0.00715171	Atp6v1g1
ENSMUSG00000035919	230.335	-0.438268	0.129273	-3.39025	0.0006983	0.00718252	Bbs9
ENSMUSG00000022619	6272.21	-0.289684	0.0854743	-3.38914	0.000701122	0.00720732	Mapk8ip2
ENSMUSG00000100396	30.1901	-1.16756	0.344558	-3.38859	0.000702542	0.0072177	Gm29367
ENSMUSG00000032548	65.6311	0.794861	0.234593	3.38825	0.000703399	0.00722227	Slco2a1
ENSMUSG00000039509	540.938	-0.415664	0.122844	-3.38367	0.000715232	0.00733948	Nup133
ENSMUSG00000032125	192.561	0.519601	0.153569	3.3835	0.000715678	0.00733978	Robo4
ENSMUSG00000029674	1306.8	-0.277729	0.0821421	-3.38108	0.000722027	0.00740056	Limk1
ENSMUSG00000038400	1133.56	-0.26311	0.0778286	-3.38064	0.000723185	0.00740811	Pmepa1
ENSMUSG00000037541	3280.45	-0.343104	0.101503	-3.38022	0.000724275	0.00741496	Shank2
ENSMUSG00000071637	211.771	1.34757	0.39873	3.37967	0.000725736	0.00742559	Cebpd
ENSMUSG00000087022	166.212	-0.645128	0.190923	-3.37899	0.000727516	0.00743946	9130024F11Rik
ENSMUSG00000006445	63.5036	0.809132	0.239557	3.37761	0.000731177	0.00747256	Epha2
ENSMUSG00000037685	4275.68	-0.311351	0.0922349	-3.37563	0.00073648	0.00752238	Atp8a1
ENSMUSG00000031827	1160.34	0.400408	0.118658	3.37448	0.000739548	0.00754932	Cotl1
ENSMUSG00000036273	984.985	-0.458792	0.136036	-3.37258	0.000744671	0.0075972	Lrrk2
ENSMUSG00000029153	1293.63	-0.362762	0.107567	-3.37241	0.00074513	0.00759747	Ociad2
ENSMUSG00000033192	281.371	0.758831	0.225106	3.371	0.000748954	0.00763204	Lpcat2
ENSMUSG00000053253	2060.1	-0.268179	0.0795808	-3.36989	0.000751971	0.00765833	Ndfip2
ENSMUSG00000026959	6430.52	-0.238309	0.0707216	-3.36968	0.00075256	0.0076599	Grin1
ENSMUSG00000007891	5032.59	0.928661	0.275631	3.36922	0.000753815	0.00766379	Ctsd
ENSMUSG00000035621	1632.39	0.292105	0.0866955	3.36932	0.000753538	0.00766379	Midn
ENSMUSG00000079553	42.6477	1.25224	0.371745	3.36854	0.000755683	0.00767834	Kifc1
ENSMUSG00000036256	508.719	0.391204	0.11615	3.36808	0.000756946	0.00768672	Igfbp7
ENSMUSG00000062785	2730.42	-0.277149	0.0822944	-3.36777	0.00075778	0.00769074	Kcnc3
ENSMUSG00000044014	88.2986	-0.829317	0.246332	-3.36666	0.000760849	0.00771743	Npy5r
ENSMUSG00000045763	7957.26	-0.316897	0.0941639	-3.36538	0.000764385	0.00774882	Basp1
ENSMUSG00000000538	5558.6	-0.194321	0.0577518	-3.36475	0.000766125	0.00776199	Tom1l2
ENSMUSG00000042638	31.1997	1.38254	0.411099	3.36303	0.000770927	0.00780154	Gucy2c
ENSMUSG00000028073	159.436	0.626031	0.186157	3.36291	0.000771257	0.00780154	Pear1
ENSMUSG00000029330	2070.87	-0.270483	0.0804321	-3.36287	0.000771361	0.00780154	Cds1
ENSMUSG00000034825	2805.29	-0.263251	0.078292	-3.36243	0.000772599	0.00780762	Nrip3
ENSMUSG00000034295	883.464	-0.300982	0.0895157	-3.36234	0.000772851	0.00780762	Fhod3
ENSMUSG00000050708	1672.71	0.364312	0.108378	3.36149	0.000775221	0.00782706	Ftl1
ENSMUSG00000034390	3608.58	-0.26507	0.0788705	-3.36083	0.000777089	0.00784141	Cmip
ENSMUSG00000026786	119.4	0.941125	0.280118	3.35974	0.00078015	0.00786555	Apbb1ip
ENSMUSG00000036617	1897.6	-0.400592	0.119236	-3.35966	0.000780376	0.00786555	Etl4
ENSMUSG00000056032	11.3294	2.10283	0.625948	3.35944	0.00078101	0.00786742	BC018473
ENSMUSG00000050963	616.712	-0.396129	0.117932	-3.35897	0.000782349	0.00787639	Kcns2
ENSMUSG00000021061	3593.31	-0.294892	0.0878205	-3.3579	0.000785382	0.00789788	Sptb
ENSMUSG00000034867	641.995	-0.303779	0.0904657	-3.35795	0.000785235	0.00789788	Ankrd27
ENSMUSG00000050530	1625.36	-0.23411	0.0697265	-3.35755	0.00078637	0.00790329	Fam171a1
ENSMUSG00000068856	873.096	0.269475	0.0802886	3.35633	0.000789836	0.00793359	Sf3b4
ENSMUSG00000026587	4592.42	-0.262917	0.0783468	-3.35581	0.00079134	0.00794415	Astn1
ENSMUSG00000032118	3480.02	-0.221268	0.0659407	-3.35555	0.000792066	0.00794689	Fez1
ENSMUSG00000020681	582.183	0.356658	0.106345	3.35377	0.000797183	0.00799367	Ace
ENSMUSG00000037820	266.625	0.526904	0.157136	3.35316	0.000798942	0.00800674	Tgm2
ENSMUSG00000026083	1624.44	0.252374	0.0752685	3.35299	0.000799445	0.00800721	Eif5b
ENSMUSG00000095276	16.8674	1.42798	0.426054	3.35165	0.000803309	0.00803934	Gfy
ENSMUSG00000052539	1177.89	-0.290395	0.0866446	-3.35156	0.000803568	0.00803934	Magi3
ENSMUSG00000041205	1026.76	-0.360687	0.107642	-3.35079	0.000805819	0.00805727	Map6d1
ENSMUSG00000002332	1125.04	0.430589	0.128514	3.35052	0.000806587	0.00806036	Dhrs1
ENSMUSG00000019590	1199.09	-0.295533	0.0882369	-3.34932	0.000810107	0.00808725	Cyb561
ENSMUSG00000020024	660.946	-0.360122	0.107527	-3.34913	0.000810658	0.00808725	Cep83
ENSMUSG00000040420	281	-0.466567	0.139307	-3.34919	0.000810481	0.00808725	Cdh18
ENSMUSG00000044365	672.528	-0.309746	0.0925203	-3.34787	0.000814356	0.00811953	Cxxc4
ENSMUSG00000052819	9.54391	2.68871	0.803381	3.34674	0.000817668	0.00814793	Best2
ENSMUSG00000014164	1088.59	-0.375258	0.112142	-3.34627	0.00081906	0.00815717	Klhl3
ENSMUSG00000046532	492.135	-0.324203	0.0969201	-3.34505	0.000822664	0.00818842	Ar
ENSMUSG00000023951	1711.42	0.292567	0.0875213	3.34281	0.000829336	0.00825016	Vegfa
ENSMUSG00000080797	53.7901	0.864341	0.258595	3.34244	0.000830439	0.00825645	Gm15760
ENSMUSG00000034037	253.467	0.439971	0.131643	3.34215	0.000831307	0.0082604	Fgd5
ENSMUSG00000034111	1247.74	-0.309407	0.0925817	-3.342	0.000831785	0.00826048	Tmed8
ENSMUSG00000030435	2509.94	0.253074	0.0757664	3.34019	0.000837205	0.00830492	U2af2
ENSMUSG00000024897	4061.98	-0.275283	0.0824147	-3.34021	0.000837151	0.00830492	Apba1
ENSMUSG00000109032	33.3011	1.07245	0.321197	3.33892	0.000841049	0.00833835	Gm7972
ENSMUSG00000114277	29.9158	1.19863	0.359085	3.338	0.000843825	0.00836115	Gm48583
ENSMUSG00000116589	18.854	1.69531	0.508058	3.33685	0.000847338	0.00839123	CT030190.1
ENSMUSG00000082088	20.4917	1.56088	0.467838	3.33636	0.000848818	0.00840114	Gm15753
ENSMUSG00000025532	472.834	0.372154	0.111578	3.33538	0.000851815	0.00842606	Crcp
ENSMUSG00000022205	2943.92	-0.277441	0.0831879	-3.33511	0.000852653	0.00842961	Sub1
ENSMUSG00000045509	68.9857	-0.706381	0.211856	-3.33425	0.000855297	0.00845099	Gpr150
ENSMUSG00000038506	833.917	-0.268854	0.0806671	-3.33288	0.000859512	0.00848497	Dcun1d2
ENSMUSG00000044149	701.587	-0.398803	0.119659	-3.33282	0.000859702	0.00848497	Nkrf
ENSMUSG00000030157	62.0107	0.740768	0.222309	3.33216	0.000861736	0.00849342	Clec2d
ENSMUSG00000042742	844.493	0.429025	0.128756	3.33208	0.000862008	0.00849342	Bmt2
ENSMUSG00000035232	474.617	-0.354361	0.106342	-3.33227	0.000861403	0.00849342	Pdk3
ENSMUSG00000052302	1651.2	-0.260008	0.0780433	-3.33158	0.00086354	0.00850373	Tbc1d30
ENSMUSG00000074136	14.1818	1.71212	0.514036	3.33073	0.000866185	0.00852023	4930513N10Rik
ENSMUSG00000031883	283.73	-0.502522	0.150874	-3.33074	0.000866151	0.00852023	Car7
ENSMUSG00000056665	877.238	-0.303632	0.0911733	-3.33027	0.000867613	0.0085295	Them6
ENSMUSG00000038453	6068.63	-0.30259	0.0909581	-3.32669	0.000878829	0.00863011	Srcin1
ENSMUSG00000022311	546.851	-0.333601	0.100278	-3.32676	0.000878616	0.00863011	Csmd3
ENSMUSG00000024851	3936.5	-0.262866	0.0790536	-3.32516	0.000883671	0.00867281	Pitpnm1
ENSMUSG00000013663	2991.93	-0.340159	0.102323	-3.32437	0.000886191	0.00869269	Pten
ENSMUSG00000027581	7259.66	-0.319645	0.0961697	-3.32376	0.000888121	0.00870675	Stmn3
ENSMUSG00000009596	21.8511	1.2909	0.388598	3.32194	0.000893934	0.00875398	Taf7l
ENSMUSG00000031708	5762.24	-0.248509	0.0748083	-3.32194	0.000893932	0.00875398	Tecr
ENSMUSG00000035901	5962.13	-0.216055	0.0650582	-3.32095	0.000897124	0.00878032	Dennd5a
ENSMUSG00000053007	167.715	0.679423	0.204636	3.32016	0.000899671	0.00880035	Creb5
ENSMUSG00000039238	11.1465	2.04821	0.617351	3.31774	0.000907484	0.00887183	Zfp750
ENSMUSG00000045409	789.588	0.301216	0.0908029	3.31725	0.000909093	0.00888262	Trim39
ENSMUSG00000036667	5376.49	-0.267387	0.0806128	-3.31693	0.000910114	0.00888765	Tcaf1
ENSMUSG00000073678	1025.79	-0.382854	0.115457	-3.31599	0.000913175	0.00891101	Pgap1
ENSMUSG00000098061	53.4646	-1.39882	0.421854	-3.31589	0.000913521	0.00891101	Gm26945
ENSMUSG00000093904	5547.44	-0.253811	0.0765499	-3.31563	0.00091438	0.00891444	Tomm20
ENSMUSG00000030579	244.634	1.33833	0.403692	3.31524	0.000915655	0.00892192	Tyrobp
ENSMUSG00000039601	4093.58	-0.243596	0.0734828	-3.31501	0.000916397	0.00892218	Rcan2
ENSMUSG00000058260	79.6134	-0.703907	0.212345	-3.31492	0.000916697	0.00892218	Serpina9
ENSMUSG00000025037	712.506	0.283161	0.0854507	3.31373	0.000920602	0.00895027	Maoa
ENSMUSG00000116641	92.281	-0.67105	0.202497	-3.31387	0.000920143	0.00895027	AC165271.1
ENSMUSG00000079491	30.0284	1.09631	0.330872	3.3134	0.000921685	0.00895584	H2-T10
ENSMUSG00000060681	2361.5	-0.268898	0.0811604	-3.31316	0.000922468	0.0089585	Slc9a6
ENSMUSG00000028869	1009.7	0.297211	0.0897111	3.31299	0.000923058	0.00895927	Gnl2
ENSMUSG00000037552	165.02	0.493128	0.148863	3.31262	0.00092426	0.00896599	Plekhg2
ENSMUSG00000028609	207.959	0.423298	0.127833	3.31133	0.000928533	0.00900247	Magoh
ENSMUSG00000005107	34.1059	1.27425	0.384833	3.31118	0.000929047	0.00900248	Slc2a9
ENSMUSG00000049176	1381.79	-0.321135	0.0969951	-3.31083	0.000930188	0.00900857	Frmpd4
ENSMUSG00000032089	130.984	0.675373	0.20402	3.31033	0.000931866	0.00901716	Il10ra
ENSMUSG00000056216	883.253	0.295645	0.0893118	3.31026	0.000932102	0.00901716	Cebpg
ENSMUSG00000003949	3450.46	-0.286441	0.0865438	-3.30978	0.000933696	0.00902761	Hlf
ENSMUSG00000037622	1420.11	-0.315137	0.0952626	-3.30809	0.000939334	0.00907712	Wdtc1
ENSMUSG00000069893	19.092	1.54154	0.466015	3.30792	0.000939918	0.00907778	9930111J21Rik1
ENSMUSG00000023345	130.579	-0.652937	0.197459	-3.30669	0.000944053	0.00911271	Poc1a
ENSMUSG00000029106	7015.18	-0.197287	0.0596669	-3.30647	0.000944794	0.00911485	Add1
ENSMUSG00000031698	32.6316	-1.05599	0.319471	-3.30544	0.000948282	0.00914348	Mylk3
ENSMUSG00000059013	440.011	0.406802	0.12312	3.30411	0.000952787	0.00918188	Sh2d3c
ENSMUSG00000021891	348.449	0.339099	0.102635	3.30394	0.000953376	0.00918251	Mettl6
ENSMUSG00000022718	587.035	0.316444	0.0957904	3.30351	0.000954833	0.00919079	Dgcr8
ENSMUSG00000031626	2744.08	-0.366584	0.110973	-3.30338	0.000955281	0.00919079	Sorbs2
ENSMUSG00000027433	904.625	0.293899	0.0889832	3.30286	0.000957042	0.00920269	Xrn2
ENSMUSG00000037336	50.7662	1.05034	0.318071	3.30223	0.000959193	0.00921832	Mfsd2b
ENSMUSG00000029623	1454.82	0.398906	0.120818	3.30171	0.000960974	0.00922535	Pdap1
ENSMUSG00000056698	399.955	0.345027	0.104495	3.30184	0.000960533	0.00922535	Elmod3
ENSMUSG00000027394	1300	-0.265318	0.0803936	-3.30024	0.000966033	0.00926885	Ttl
ENSMUSG00000091898	59.5131	-0.77038	0.233544	-3.29865	0.000971496	0.00931618	Tnnc1
ENSMUSG00000025203	33041.1	-0.231302	0.0701261	-3.29837	0.000972489	0.00932061	Scd2
ENSMUSG00000039809	5448.6	-0.288521	0.0875118	-3.29694	0.000977437	0.00936293	Gabbr2
ENSMUSG00000023755	106.017	0.647965	0.196565	3.29644	0.00097918	0.00936723	Rhebl1
ENSMUSG00000029516	3069.19	-0.25743	0.0780955	-3.29635	0.000979485	0.00936723	Cit
ENSMUSG00000053166	855.239	-0.335076	0.101645	-3.29652	0.000978914	0.00936723	Cdh22
ENSMUSG00000038301	1997.09	-0.266919	0.0810034	-3.29516	0.00098365	0.00940193	Snx10
ENSMUSG00000021719	6323.63	-0.354973	0.107742	-3.29466	0.00098542	0.00941373	Rgs7bp
ENSMUSG00000021680	321.583	0.409288	0.124247	3.29416	0.000987152	0.00942389	Crhbp
ENSMUSG00000044043	205.084	-0.483311	0.146722	-3.29405	0.000987556	0.00942389	Pcdhb14
ENSMUSG00000022054	4624.43	-0.341027	0.103615	-3.29129	0.000997294	0.00951165	Nefm
ENSMUSG00000020227	29.6744	1.1997	0.364547	3.29094	0.000998532	0.00951829	Irak3
ENSMUSG00000008200	1095.18	0.280968	0.0853862	3.29055	0.000999921	0.00952636	Fnbp4
ENSMUSG00000071379	1001.65	-0.301891	0.0917537	-3.29023	0.00100105	0.00953199	Hpcal1
ENSMUSG00000093577	50.2911	0.891623	0.27103	3.28975	0.00100275	0.009543	Gm20632
ENSMUSG00000097604	41.8986	-1.20198	0.365418	-3.28932	0.00100431	0.00955264	Gm17322
ENSMUSG00000029406	4769.24	-0.295399	0.0898368	-3.28817	0.0010084	0.00958635	Pitpnm2
ENSMUSG00000026674	278.258	0.561818	0.170937	3.28669	0.00101374	0.00963189	Ddr2
ENSMUSG00000070576	835.724	-0.339442	0.103321	-3.28532	0.00101867	0.00967349	Mn1
ENSMUSG00000100826	1185.4	-0.404045	0.123049	-3.28361	0.00102486	0.00972705	Snhg14
ENSMUSG00000043157	18.6259	1.63239	0.497167	3.28338	0.00102571	0.00972981	Arl11
ENSMUSG00000002257	41.4385	1.13866	0.347056	3.2809	0.00103478	0.00980938	Def6
ENSMUSG00000014873	471.009	0.321373	0.0979563	3.28078	0.00103521	0.00980938	Surf2
ENSMUSG00000079547	36.9938	1.1978	0.365221	3.27966	0.00103934	0.00984317	H2-DMb1
ENSMUSG00000048827	68.5589	0.884746	0.269818	3.27905	0.00104157	0.00984843	Pkd1l3
ENSMUSG00000053617	1065.44	-0.320972	0.0978824	-3.27916	0.00104117	0.00984843	Sh3pxd2a
ENSMUSG00000062257	3311.94	-0.343298	0.10469	-3.27919	0.00104106	0.00984843	Opcml
ENSMUSG00000071203	47.5794	1.21483	0.370519	3.27872	0.0010428	0.0098547	Naip5
ENSMUSG00000116564	387.752	0.369115	0.112602	3.27806	0.00104522	0.00987224	Riok2
ENSMUSG00000052631	27.1313	1.25029	0.381571	3.27669	0.0010503	0.00990961	Sh2d6
ENSMUSG00000036391	642.061	0.369327	0.112709	3.27683	0.00104981	0.00990961	Sec24a
ENSMUSG00000062372	519.78	-0.505629	0.154324	-3.27642	0.00105132	0.00991388	Otof
ENSMUSG00000027965	913.745	-0.31616	0.0965082	-3.27599	0.00105291	0.00992353	Olfm3
ENSMUSG00000055022	7028.7	-0.294279	0.0898383	-3.27566	0.00105416	0.00993004	Cntn1
ENSMUSG00000030867	53.1344	1.05395	0.321789	3.27528	0.00105557	0.0099336	Plk1
ENSMUSG00000024165	136.058	0.531226	0.162194	3.27525	0.00105567	0.0099336	Jpt2
ENSMUSG00000022309	147.971	0.657479	0.200752	3.27508	0.00105631	0.00993425	Angpt1
ENSMUSG00000022369	49.2439	0.834796	0.254936	3.27453	0.00105836	0.00994825	Mtbp
ENSMUSG00000027365	1091.64	0.247014	0.0755293	3.27044	0.0010738	0.0100791	Trpm7
ENSMUSG00000022075	2124.78	-0.24086	0.073646	-3.27051	0.00107352	0.0100791	Rhobtb2
ENSMUSG00000038128	3441.96	-0.463458	0.141714	-3.27039	0.00107401	0.0100791	Camk4
ENSMUSG00000030000	5155.45	-0.2994	0.0915671	-3.26973	0.0010765	0.0100972	Add2
ENSMUSG00000030057	4810.1	0.19509	0.0596845	3.26869	0.00108047	0.0101289	Cnbp
ENSMUSG00000036249	314.757	0.425523	0.13019	3.26849	0.00108123	0.0101307	Rbm43
ENSMUSG00000033361	838.974	-0.312805	0.0957102	-3.26825	0.00108215	0.0101339	Prrg3
ENSMUSG00000034586	1918.33	-0.21617	0.0661671	-3.26704	0.0010868	0.010172	Hid1
ENSMUSG00000031432	1085.99	-0.264351	0.0809423	-3.26592	0.00109109	0.0102067	Prps1
ENSMUSG00000025743	4850.29	0.323761	0.0991924	3.26397	0.00109864	0.0102719	Sdc3
ENSMUSG00000039195	1297.47	-0.389009	0.1192	-3.2635	0.00110045	0.0102834	1110008P14Rik
ENSMUSG00000027612	755.098	-0.358139	0.109749	-3.26325	0.00110142	0.010287	Mmp24
ENSMUSG00000020894	16892	-0.215404	0.0660191	-3.26275	0.00110337	0.0102997	Vamp2
ENSMUSG00000038930	179.208	0.516742	0.158402	3.26221	0.00110547	0.0103031	Rccd1
ENSMUSG00000017740	12251.5	-0.263391	0.0807369	-3.26234	0.00110496	0.0103031	Slc12a5
ENSMUSG00000048355	269.266	-0.419185	0.128504	-3.26205	0.00110608	0.0103031	Arxes1
ENSMUSG00000035274	230.777	-0.534398	0.163821	-3.26209	0.00110595	0.0103031	Tpbg
ENSMUSG00000028937	4182.47	-0.274106	0.0840572	-3.26094	0.00111042	0.0103381	Acot7
ENSMUSG00000024529	31.8532	1.29761	0.398051	3.25991	0.00111447	0.0103663	Lox
ENSMUSG00000033569	1647.01	-0.273205	0.0838087	-3.25987	0.00111464	0.0103663	Adgrb3
ENSMUSG00000030279	1295.13	-0.305232	0.0936483	-3.25934	0.0011167	0.01038	C2cd5
ENSMUSG00000018909	5797.1	-0.247188	0.0759161	-3.25607	0.00112966	0.0104949	Arrb1
ENSMUSG00000074576	288.679	0.364681	0.112023	3.25542	0.00113225	0.0105135	Mocs3
ENSMUSG00000037747	3482.38	-0.263045	0.0808116	-3.25504	0.00113378	0.010522	Phyhipl
ENSMUSG00000049130	30.4655	1.30491	0.401192	3.25258	0.00114361	0.0106077	C5ar1
ENSMUSG00000024292	165.318	0.560238	0.172255	3.25238	0.00114441	0.0106095	Cyp4f14
ENSMUSG00000029359	598.746	-0.589462	0.181254	-3.25214	0.00114541	0.0106132	Tesc
ENSMUSG00000019888	172.558	-0.471736	0.145103	-3.25105	0.0011498	0.0106482	Mgat4c
ENSMUSG00000021259	3417.04	-0.257824	0.0793488	-3.24925	0.0011571	0.0107102	Cyp46a1
ENSMUSG00000031216	536.031	-0.379788	0.116893	-3.24902	0.00115803	0.0107132	Stard8
ENSMUSG00000078235	385.332	-0.430282	0.13249	-3.24766	0.00116357	0.0107587	Fam43b
ENSMUSG00000027361	435.574	0.30962	0.0953444	3.24739	0.0011647	0.0107635	Gabpb1
ENSMUSG00000047787	536.397	-0.383184	0.118003	-3.24724	0.00116532	0.0107636	Flrt1
ENSMUSG00000045284	1138.93	-0.265908	0.0819232	-3.24582	0.00117113	0.0108116	Dcaf12l1
ENSMUSG00000034171	1449.59	-0.281442	0.0867209	-3.24538	0.00117293	0.0108225	Faah
ENSMUSG00000041057	620.51	0.435098	0.13408	3.24507	0.00117422	0.010823	Wdr43
ENSMUSG00000024750	3024.16	-0.26423	0.0814233	-3.24514	0.00117395	0.010823	Zfand5
ENSMUSG00000031880	54.3623	1.16028	0.357683	3.24386	0.00117921	0.0108529	Rrad
ENSMUSG00000087153	56.0189	0.903662	0.278616	3.2434	0.00118112	0.0108529	Gm6483
ENSMUSG00000026843	711.002	0.304255	0.0938076	3.2434	0.00118112	0.0108529	Fubp3
ENSMUSG00000025980	2809.23	-0.205194	0.0632554	-3.2439	0.00117906	0.0108529	Hspd1
ENSMUSG00000022285	16181.9	-0.240228	0.0740658	-3.24344	0.00118094	0.0108529	Ywhaz
ENSMUSG00000030020	3675.26	-0.296242	0.0913372	-3.24339	0.00118117	0.0108529	Prickle2
ENSMUSG00000030350	1171.69	-0.348835	0.107559	-3.24321	0.00118191	0.010854	Prmt8
ENSMUSG00000000881	3061.65	-0.296638	0.0914763	-3.24278	0.0011837	0.0108591	Dlg3
ENSMUSG00000017400	1532.58	-0.312061	0.0962306	-3.24284	0.00118343	0.0108591	Stac2
ENSMUSG00000017713	69.8577	0.765327	0.236082	3.24179	0.00118783	0.01088	Tha1
ENSMUSG00000024312	193.239	0.440015	0.135729	3.24187	0.00118749	0.01088	Wdr46
ENSMUSG00000035268	980.458	-0.269478	0.0831243	-3.24187	0.00118749	0.01088	Pkig
ENSMUSG00000026443	2202.63	-0.300816	0.0928048	-3.24139	0.0011895	0.010884	Lrrn2
ENSMUSG00000022103	1060.89	-0.345446	0.106569	-3.24152	0.00118894	0.010884	Gfra2
ENSMUSG00000038143	2535.01	-0.284694	0.0878554	-3.24049	0.00119326	0.0109127	Stox2
ENSMUSG00000102813	76.5536	0.808679	0.24966	3.23912	0.00119898	0.0109593	Gm37795
ENSMUSG00000074781	3009.47	-0.257898	0.0796511	-3.23785	0.00120435	0.0110002	Ube2n
ENSMUSG00000045994	3842.14	-0.261405	0.0807365	-3.23776	0.00120472	0.0110002	B3gat1
ENSMUSG00000043252	1119.18	-0.282675	0.0873403	-3.23648	0.00121013	0.011044	Tmem64
ENSMUSG00000028639	2809.37	0.283338	0.0875677	3.23564	0.00121371	0.0110708	Ybx1
ENSMUSG00000038352	38.8165	1.15882	0.35834	3.23384	0.00122138	0.011135	Arl5c
ENSMUSG00000103649	53.8369	0.826339	0.255607	3.23285	0.00122562	0.0111679	Gm37768
ENSMUSG00000038115	76.7735	-0.796941	0.246571	-3.2321	0.00122886	0.0111916	Ano2
ENSMUSG00000026667	6008.64	-0.266941	0.0826191	-3.23098	0.00123367	0.0112296	Uhmk1
ENSMUSG00000028211	500.136	0.651536	0.201675	3.23063	0.0012352	0.0112377	Trp53inp1
ENSMUSG00000034648	1406.03	-0.26637	0.0824572	-3.2304	0.00123616	0.0112406	Lrrn1
ENSMUSG00000030342	891.742	0.883454	0.273529	3.22984	0.0012386	0.0112461	Cd9
ENSMUSG00000020455	574.679	0.381348	0.118071	3.22982	0.00123868	0.0112461	Trim11
ENSMUSG00000071655	1113.33	0.287762	0.0890896	3.23003	0.00123776	0.0112461	Ubxn1
ENSMUSG00000039531	209.796	0.437231	0.135417	3.22878	0.00124319	0.0112812	Zup1
ENSMUSG00000085287	42.7541	0.862604	0.267366	3.2263	0.00125402	0.0113603	4833418N02Rik
ENSMUSG00000029452	71.5958	0.701916	0.217568	3.22619	0.0012545	0.0113603	Tmem116
ENSMUSG00000031488	77.0633	0.672968	0.208593	3.22622	0.00125437	0.0113603	Rab11fip1
ENSMUSG00000022340	1573.18	-0.236877	0.0734201	-3.22632	0.00125393	0.0113603	Sybu
ENSMUSG00000036655	15.4361	1.66449	0.515967	3.22597	0.00125546	0.0113631	Colec11
ENSMUSG00000027435	232.202	0.44682	0.138515	3.22579	0.00125624	0.0113643	Cd93
ENSMUSG00000096001	9.89745	1.98807	0.616441	3.22507	0.00125941	0.0113872	2610528A11Rik
ENSMUSG00000052031	497.893	0.283715	0.0879924	3.22431	0.00126277	0.0114117	Tagap1
ENSMUSG00000030263	38.5045	1.00857	0.312885	3.22346	0.00126653	0.0114398	Lrmp
ENSMUSG00000001227	2503.72	-0.323239	0.100298	-3.22278	0.00126952	0.0114609	Sema6b
ENSMUSG00000038718	486.878	-0.416059	0.129114	-3.22242	0.00127115	0.0114697	Pbx3
ENSMUSG00000029467	18241.2	-0.287183	0.0891668	-3.22074	0.00127859	0.0115309	Atp2a2
ENSMUSG00000036052	3431.67	0.278815	0.086576	3.22047	0.00127982	0.0115361	Dnajb5
ENSMUSG00000038473	1448.1	-0.386664	0.120071	-3.2203	0.00128055	0.0115367	Nos1ap
ENSMUSG00000035594	33.9834	-1.01559	0.315457	-3.21943	0.00128445	0.011566	Chrna5
ENSMUSG00000046351	586.225	-0.387082	0.120267	-3.21852	0.00128855	0.0115969	Zfp322a
ENSMUSG00000027007	1317.55	0.39304	0.122173	3.21709	0.00129499	0.0116489	Ssfa2
ENSMUSG00000040586	226.283	0.541237	0.168319	3.21554	0.00130199	0.0116939	Ofd1
ENSMUSG00000054752	745.06	-0.311886	0.0969916	-3.2156	0.00130173	0.0116939	Fsd1l
ENSMUSG00000101249	724.357	-1.19026	0.370133	-3.21578	0.00130092	0.0116939	Gm29216
ENSMUSG00000001918	97.9729	0.734035	0.228307	3.21513	0.00130385	0.0116987	Slc1a5
ENSMUSG00000058625	142.555	-0.586078	0.182287	-3.21514	0.00130382	0.0116987	Gm17383
ENSMUSG00000030203	339.446	0.489857	0.152413	3.21401	0.00130894	0.0117383	Dusp16
ENSMUSG00000035745	16.3557	1.60773	0.500271	3.21371	0.00131031	0.0117447	Grin3b
ENSMUSG00000091337	2266.29	-0.240552	0.0748629	-3.21323	0.00131249	0.0117582	Eid1
ENSMUSG00000016528	744.436	0.366763	0.114151	3.21297	0.00131368	0.0117629	Mapkapk2
ENSMUSG00000020307	702.402	0.389729	0.121333	3.21205	0.00131792	0.0117888	Cdc34
ENSMUSG00000057691	642.995	0.298301	0.092866	3.21216	0.0013174	0.0117888	Zfp746
ENSMUSG00000021192	566.996	0.320296	0.0997381	3.21137	0.00132105	0.0118	Golga5
ENSMUSG00000032279	3648.71	-0.224538	0.0699205	-3.21134	0.00132118	0.0118	Idh3a
ENSMUSG00000031517	19915.9	-0.310985	0.0968323	-3.21158	0.00132008	0.0118	Gpm6a
ENSMUSG00000029095	2215.6	-0.366828	0.114237	-3.21111	0.00132221	0.0118032	Ablim2
ENSMUSG00000029189	1044.02	-0.280282	0.0873283	-3.20952	0.00132956	0.0118627	Sel1l3
ENSMUSG00000038766	548.727	0.294191	0.0917156	3.20764	0.00133829	0.0119177	Gabpb2
ENSMUSG00000038482	1079.21	0.245042	0.0763941	3.20761	0.00133843	0.0119177	Tfdp1
ENSMUSG00000024743	5711.98	-0.31394	0.0978695	-3.20774	0.00133784	0.0119177	Syt7
ENSMUSG00000050222	476.092	-0.392645	0.122402	-3.20783	0.0013374	0.0119177	Il17d
ENSMUSG00000041488	724.579	0.315297	0.0983213	3.2068	0.0013422	0.0119339	Stx3
ENSMUSG00000052397	1189.58	0.313685	0.0978176	3.20683	0.00134206	0.0119339	Ezr
ENSMUSG00000020849	11014.7	-0.228663	0.071306	-3.20678	0.00134229	0.0119339	Ywhae
ENSMUSG00000035984	87.9983	-0.604851	0.18864	-3.20638	0.00134417	0.0119446	Nme5
ENSMUSG00000030718	3409.81	-0.211201	0.0658818	-3.20576	0.00134707	0.0119643	Ppme1
ENSMUSG00000087516	22.1341	1.20341	0.375411	3.20557	0.00134794	0.011966	Tbx3os1
ENSMUSG00000116165	1422.75	-0.303368	0.0946655	-3.20462	0.00135239	0.0119994	Pdxp
ENSMUSG00000041324	354.266	0.571686	0.178415	3.20425	0.00135413	0.0120027	Inhba
ENSMUSG00000095247	30.8501	-1.30688	0.407852	-3.20431	0.00135389	0.0120027	Ccl27a
ENSMUSG00000021886	12.2167	2.63012	0.820976	3.20365	0.00135699	0.012022	Gpr65
ENSMUSG00000071723	576.549	-0.306126	0.0955757	-3.20297	0.0013602	0.0120444	Gspt2
ENSMUSG00000028126	1247.22	0.275538	0.0860371	3.20255	0.00136215	0.0120495	Pip5k1a
ENSMUSG00000001103	27.5067	-1.13102	0.353162	-3.20256	0.00136213	0.0120495	Sebox
ENSMUSG00000041375	827.653	0.399366	0.12471	3.20236	0.00136308	0.0120516	Ccdc9
ENSMUSG00000046186	83.0996	1.11178	0.347212	3.20203	0.00136465	0.0120594	Cd109
ENSMUSG00000047810	88.6328	0.707845	0.221108	3.20135	0.00136783	0.0120815	Ccdc88b
ENSMUSG00000078652	2074.75	0.232166	0.0725284	3.20103	0.00136937	0.0120864	Psme3
ENSMUSG00000025227	486.947	-0.318196	0.0994069	-3.20095	0.00136976	0.0120864	Mfsd13a
ENSMUSG00000006498	650.541	0.381911	0.11936	3.19965	0.00137596	0.012135	Ptbp1
ENSMUSG00000033434	271.105	0.527813	0.165005	3.19877	0.00138017	0.0121571	Gtpbp6
ENSMUSG00000020458	10940.9	-0.244943	0.0765818	-3.19844	0.00138172	0.0121571	Rtn4
ENSMUSG00000022240	4085.17	-0.259088	0.0810056	-3.1984	0.00138192	0.0121571	Ctnnd2
ENSMUSG00000004187	6607.15	-0.394738	0.123401	-3.19883	0.00137986	0.0121571	Kifc2
ENSMUSG00000021032	177.665	-0.525307	0.164236	-3.19848	0.00138152	0.0121571	Ngb
ENSMUSG00000026080	1326.35	-0.262439	0.0820722	-3.19766	0.00138546	0.0121821	Chst10
ENSMUSG00000078942	22.7735	1.51181	0.472869	3.19709	0.0013882	0.012194	Naip6
[truncated: 15,573 more rows]

## Sheet: P75_Ca_sig
	Gene ID	log2FoldChange	padj	Gene Name	Gene Description
1	ENSMUSG00000020303	2.53603	3.72768e-44	Stc2	stanniocalcin 2 [Source:MGI Symbol;Acc:MGI:1316731]
2	ENSMUSG00000028893	2.16557	4.67558e-42	Sesn2	sestrin 2 [Source:MGI Symbol;Acc:MGI:2651874]
3	ENSMUSG00000025408	1.7934	8.12729e-41	Ddit3	DNA-damage inducible transcript 3 [Source:MGI Symbol;Acc:MGI:109247]
4	ENSMUSG00000078853	2.94304	3.26155e-40	Igtp	interferon gamma induced GTPase [Source:MGI Symbol;Acc:MGI:107729]
5	ENSMUSG00000026456	1.51524	8.53449e-40	Cyb5r1	cytochrome b5 reductase 1 [Source:MGI Symbol;Acc:MGI:1919267]
6	ENSMUSG00000019768	3.88797	2.90531e-38	Esr1	estrogen receptor 1 (alpha) [Source:MGI Symbol;Acc:MGI:1352467]
7	ENSMUSG00000025403	1.53242	5.36867e-38	Shmt2	serine hydroxymethyltransferase 2 (mitochondrial) [Source:MGI Symbol;Acc:MGI:1277989]
8	ENSMUSG00000068744	2.39061	3.14823e-37	Psrc1	proline/serine-rich coiled-coil 1 [Source:MGI Symbol;Acc:MGI:1913099]
9	ENSMUSG00000031297	1.37778	2.65427e-36	Slc7a3	solute carrier family 7 (cationic amino acid transporter, y+ system), member 3 [Source:MGI Symbol;Acc:MGI:1100521]
10	ENSMUSG00000027313	1.98845	1.6812e-35	Chac1	ChaC, cation transport regulator 1 [Source:MGI Symbol;Acc:MGI:1916315]
11	ENSMUSG00000110631	2.13606	5.72723e-34	Gm42047	predicted gene, 42047 [Source:MGI Symbol;Acc:MGI:5624932]
12	ENSMUSG00000034422	2.72414	4.52501e-32	Parp14	poly (ADP-ribose) polymerase family, member 14 [Source:MGI Symbol;Acc:MGI:1919489]
13	ENSMUSG00000029561	4.92993	6.0696e-32	Oasl2	2'-5' oligoadenylate synthetase-like 2 [Source:MGI Symbol;Acc:MGI:1344390]
14	ENSMUSG00000002083	1.85971	7.42687e-31	Bbc3	BCL2 binding component 3 [Source:MGI Symbol;Acc:MGI:2181667]
15	ENSMUSG00000074151	3.43919	6.26697e-30	Nlrc5	NLR family, CARD domain containing 5 [Source:MGI Symbol;Acc:MGI:3612191]
16	ENSMUSG00000002325	2.18577	8.06997e-30	Irf9	interferon regulatory factor 9 [Source:MGI Symbol;Acc:MGI:107587]
17	ENSMUSG00000031960	0.767767	1.12295e-28	Aars	alanyl-tRNA synthetase [Source:MGI Symbol;Acc:MGI:2384560]
18	ENSMUSG00000074896	4.19881	3.25577e-28	Ifit3	interferon-induced protein with tetratricopeptide repeats 3 [Source:MGI Symbol;Acc:MGI:1101055]
19	ENSMUSG00000016496	3.05623	1.13322e-27	Cd274	CD274 antigen [Source:MGI Symbol;Acc:MGI:1926446]
20	ENSMUSG00000040483	2.63751	1.30341e-27	Xaf1	XIAP associated factor 1 [Source:MGI Symbol;Acc:MGI:3772572]
21	ENSMUSG00000025498	4.75116	9.85252e-27	Irf7	interferon regulatory factor 7 [Source:MGI Symbol;Acc:MGI:1859212]
22	ENSMUSG00000028268	3.63202	1.5692e-26	Gbp3	guanylate binding protein 3 [Source:MGI Symbol;Acc:MGI:1926263]
23	ENSMUSG00000026896	2.41016	1.17371e-25	Ifih1	interferon induced with helicase C domain 1 [Source:MGI Symbol;Acc:MGI:1918836]
24	ENSMUSG00000024587	0.72173	1.8752e-25	Nars	asparaginyl-tRNA synthetase [Source:MGI Symbol;Acc:MGI:1917473]
25	ENSMUSG00000035692	4.39252	6.72254e-24	Isg15	ISG15 ubiquitin-like modifier [Source:MGI Symbol;Acc:MGI:1855694]
26	ENSMUSG00000060519	2.09977	8.46535e-24	Tor3a	torsin family 3, member A [Source:MGI Symbol;Acc:MGI:1353652]
27	ENSMUSG00000091549	2.48171	8.73566e-24	Gm6548	predicted gene 6548 [Source:MGI Symbol;Acc:MGI:3644071]
28	ENSMUSG00000062488	3.93176	1.34842e-23	Ifit3b	interferon-induced protein with tetratricopeptide repeats 3B [Source:MGI Symbol;Acc:MGI:3698419]
29	ENSMUSG00000052684	1.2954	1.66254e-23	Jun	jun proto-oncogene [Source:MGI Symbol;Acc:MGI:96646]
30	ENSMUSG00000057596	3.24255	1.03484e-22	Trim30d	tripartite motif-containing 30D [Source:MGI Symbol;Acc:MGI:3035181]
31	ENSMUSG00000028811	0.747788	2.2486e-22	Yars	tyrosyl-tRNA synthetase [Source:MGI Symbol;Acc:MGI:2147627]
32	ENSMUSG00000070327	3.20404	3.9835e-22	Rnf213	ring finger protein 213 [Source:MGI Symbol;Acc:MGI:1289196]
33	ENSMUSG00000073555	4.47273	3.9835e-22	Gm4951	predicted gene 4951 [Source:MGI Symbol;Acc:MGI:3644953]
34	ENSMUSG00000068739	0.662517	5.33363e-22	Sars	seryl-aminoacyl-tRNA synthetase [Source:MGI Symbol;Acc:MGI:102809]
35	ENSMUSG00000079017	4.62012	5.33363e-22	Ifi27l2a	interferon, alpha-inducible protein 27 like 2A [Source:MGI Symbol;Acc:MGI:1924183]
36	ENSMUSG00000032690	3.34785	1.03094e-21	Oas2	2'-5' oligoadenylate synthetase 2 [Source:MGI Symbol;Acc:MGI:2180852]
37	ENSMUSG00000025492	2.71734	1.14068e-20	Ifitm3	interferon induced transmembrane protein 3 [Source:MGI Symbol;Acc:MGI:1913391]
38	ENSMUSG00000034459	4.61965	1.46169e-20	Ifit1	interferon-induced protein with tetratricopeptide repeats 1 [Source:MGI Symbol;Acc:MGI:99450]
39	ENSMUSG00000005667	1.37065	1.47774e-20	Mthfd2	methylenetetrahydrofolate dehydrogenase (NAD+ dependent), methenyltetrahydrofolate cyclohydrolase [Source:MGI Symbol;Acc:MGI:1338850]
40	ENSMUSG00000024521	2.59627	2.18534e-20	Pmaip1	phorbol-12-myristate-13-acetate-induced protein 1 [Source:MGI Symbol;Acc:MGI:1930146]
41	ENSMUSG00000030107	4.27936	3.06061e-20	Usp18	ubiquitin specific peptidase 18 [Source:MGI Symbol;Acc:MGI:1344364]
42	ENSMUSG00000046718	3.8492	7.02781e-20	Bst2	bone marrow stromal cell antigen 2 [Source:MGI Symbol;Acc:MGI:1916800]
43	ENSMUSG00000027514	4.99252	1.14193e-19	Zbp1	Z-DNA binding protein 1 [Source:MGI Symbol;Acc:MGI:1927449]
44	ENSMUSG00000010095	0.716154	1.17169e-19	Slc3a2	solute carrier family 3 (activators of dibasic and neutral amino acid transport), member 2 [Source:MGI Symbol;Acc:MGI:96955]
45	ENSMUSG00000075602	1.26499	1.24302e-19	Ly6a	lymphocyte antigen 6 complex, locus A [Source:MGI Symbol;Acc:MGI:107527]
46	ENSMUSG00000029298	2.23842	2.74546e-19	Gbp9	guanylate-binding protein 9 [Source:MGI Symbol;Acc:MGI:3605620]
47	ENSMUSG00000105504	2.57826	4.37591e-19	Gbp5	guanylate binding protein 5 [Source:MGI Symbol;Acc:MGI:2429943]
48	ENSMUSG00000073418	3.00731	5.6209e-19	C4b	complement component 4B (Chido blood group) [Source:MGI Symbol;Acc:MGI:88228]
49	ENSMUSG00000022906	2.50829	5.6209e-19	Parp9	poly (ADP-ribose) polymerase family, member 9 [Source:MGI Symbol;Acc:MGI:1933117]
50	ENSMUSG00000019326	2.94504	8.27929e-19	Aoc3	amine oxidase, copper containing 3 [Source:MGI Symbol;Acc:MGI:1306797]
51	ENSMUSG00000040033	1.6636	1.12835e-18	Stat2	signal transducer and activator of transcription 2 [Source:MGI Symbol;Acc:MGI:103039]
52	ENSMUSG00000039304	1.79202	1.39438e-18	Tnfsf10	tumor necrosis factor (ligand) superfamily, member 10 [Source:MGI Symbol;Acc:MGI:107414]
53	ENSMUSG00000032715	2.64766	1.72667e-18	Trib3	tribbles pseudokinase 3 [Source:MGI Symbol;Acc:MGI:1345675]
54	ENSMUSG00000023249	2.08957	1.75646e-18	Parp3	poly (ADP-ribose) polymerase family, member 3 [Source:MGI Symbol;Acc:MGI:1891258]
55	ENSMUSG00000086290	1.29085	2.65965e-18	Snhg12	small nucleolar RNA host gene 12 [Source:MGI Symbol;Acc:MGI:1916721]
56	ENSMUSG00000106734	2.37021	2.65965e-18	Gm20559	predicted gene, 20559 [Source:MGI Symbol;Acc:MGI:5295666]
57	ENSMUSG00000035352	4.02699	3.1484e-18	Ccl12	chemokine (C-C motif) ligand 12 [Source:MGI Symbol;Acc:MGI:108224]
58	ENSMUSG00000026104	2.68681	3.28209e-18	Stat1	signal transducer and activator of transcription 1 [Source:MGI Symbol;Acc:MGI:103063]
59	ENSMUSG00000064215	1.38458	3.80265e-18	Ifi27	interferon, alpha-inducible protein 27 [Source:MGI Symbol;Acc:MGI:1277180]
60	ENSMUSG00000033355	3.63861	3.80396e-18	Rtp4	receptor transporter protein 4 [Source:MGI Symbol;Acc:MGI:1915025]
61	ENSMUSG00000038507	1.81373	4.25092e-18	Parp12	poly (ADP-ribose) polymerase family, member 12 [Source:MGI Symbol;Acc:MGI:2143990]
62	ENSMUSG00000031490	1.92207	4.30942e-18	Eif4ebp1	eukaryotic translation initiation factor 4E binding protein 1 [Source:MGI Symbol;Acc:MGI:103267]
63	ENSMUSG00000074968	-1.29925	4.822e-18	Ano3	anoctamin 3 [Source:MGI Symbol;Acc:MGI:3613666]
64	ENSMUSG00000023067	1.41164	5.31109e-18	Cdkn1a	cyclin-dependent kinase inhibitor 1A (P21) [Source:MGI Symbol;Acc:MGI:104556]
65	ENSMUSG00000033880	3.17373	7.34326e-18	Lgals3bp	lectin, galactoside-binding, soluble, 3 binding protein [Source:MGI Symbol;Acc:MGI:99554]
66	ENSMUSG00000054206	2.5691	7.48202e-18	Gzmm	granzyme M (lymphocyte met-ase 1) [Source:MGI Symbol;Acc:MGI:99549]
67	ENSMUSG00000020641	4.01003	1.02567e-17	Rsad2	radical S-adenosyl methionine domain containing 2 [Source:MGI Symbol;Acc:MGI:1929628]
68	ENSMUSG00000040010	0.856382	1.27153e-17	Slc7a5	solute carrier family 7 (cationic amino acid transporter, y+ system), member 5 [Source:MGI Symbol;Acc:MGI:1298205]
69	ENSMUSG00000000386	5.41508	1.27153e-17	Mx1	MX dynamin-like GTPase 1 [Source:MGI Symbol;Acc:MGI:97243]
70	ENSMUSG00000040424	-0.939376	1.86456e-17	Hipk4	homeodomain interacting protein kinase 4 [Source:MGI Symbol;Acc:MGI:2685008]
71	ENSMUSG00000022385	3.72373	2.79096e-17	Gtse1	G two S phase expressed protein 1 [Source:MGI Symbol;Acc:MGI:1352755]
72	ENSMUSG00000037921	4.07313	3.06659e-17	Ddx60	DExD/H box helicase 60 [Source:MGI Symbol;Acc:MGI:2384570]
73	ENSMUSG00000029826	1.87665	3.88039e-17	Zc3hav1	zinc finger CCCH type, antiviral 1 [Source:MGI Symbol;Acc:MGI:1926031]
74	ENSMUSG00000028037	4.69622	3.97086e-17	Ifi44	interferon-induced protein 44 [Source:MGI Symbol;Acc:MGI:2443016]
75	ENSMUSG00000053461	3.31861	4.29451e-17	Hhipl2	hedgehog interacting protein-like 2 [Source:MGI Symbol;Acc:MGI:1926022]
76	ENSMUSG00000069793	3.2477	1.56689e-16	Slfn9	schlafen 9 [Source:MGI Symbol;Acc:MGI:2445121]
77	ENSMUSG00000065590	2.10324	1.86503e-16	Mir212	microRNA 212 [Source:MGI Symbol;Acc:MGI:2676888]
78	ENSMUSG00000022351	-0.853879	2.89712e-16	Sqle	squalene epoxidase [Source:MGI Symbol;Acc:MGI:109296]
79	ENSMUSG00000026222	2.05946	3.49505e-16	Sp100	nuclear antigen Sp100 [Source:MGI Symbol;Acc:MGI:109561]
80	ENSMUSG00000015312	1.1185	5.75991e-16	Gadd45b	growth arrest and DNA-damage-inducible 45 beta [Source:MGI Symbol;Acc:MGI:107776]
81	ENSMUSG00000105613	2.76028	5.75991e-16	Gm43684	predicted gene 43684 [Source:MGI Symbol;Acc:MGI:5663821]
82	ENSMUSG00000043263	5.60839	5.78183e-16	Ifi209	interferon activated gene 209 [Source:MGI Symbol;Acc:MGI:2138243]
83	ENSMUSG00000037321	3.01635	6.05503e-16	Tap1	transporter 1, ATP-binding cassette, sub-family B (MDR/TAP) [Source:MGI Symbol;Acc:MGI:98483]
84	ENSMUSG00000043279	1.56968	6.52788e-16	Trim56	tripartite motif-containing 56 [Source:MGI Symbol;Acc:MGI:2685298]
85	ENSMUSG00000024338	2.65963	7.43195e-16	Psmb8	proteasome (prosome, macropain) subunit, beta type 8 (large multifunctional peptidase 7) [Source:MGI Symbol;Acc:MGI:1346527]
86	ENSMUSG00000026202	-0.721464	7.69493e-16	Tuba4a	tubulin, alpha 4A [Source:MGI Symbol;Acc:MGI:1095410]
87	ENSMUSG00000027580	1.35035	7.72068e-16	Helz2	helicase with zinc finger 2, transcriptional coactivator [Source:MGI Symbol;Acc:MGI:2385169]
88	ENSMUSG00000039236	3.58472	7.9638e-16	Isg20	interferon-stimulated protein [Source:MGI Symbol;Acc:MGI:1928895]
89	ENSMUSG00000064354	-0.927968	7.97159e-16	mt-Co2	mitochondrially encoded cytochrome c oxidase II [Source:MGI Symbol;Acc:MGI:102503]
90	ENSMUSG00000072620	2.15708	8.61733e-16	Slfn2	schlafen 2 [Source:MGI Symbol;Acc:MGI:1313258]
91	ENSMUSG00000060550	2.9535	1.40466e-15	H2-Q7	histocompatibility 2, Q region locus 7 [Source:MGI Symbol;Acc:MGI:95936]
92	ENSMUSG00000028270	2.98691	1.45081e-15	Gbp2	guanylate binding protein 2 [Source:MGI Symbol;Acc:MGI:102772]
93	ENSMUSG00000073489	4.38767	1.63861e-15	Ifi204	interferon activated gene 204 [Source:MGI Symbol;Acc:MGI:96429]
94	ENSMUSG00000034855	6.06177	1.8081e-15	Cxcl10	chemokine (C-X-C motif) ligand 10 [Source:MGI Symbol;Acc:MGI:1352450]
95	ENSMUSG00000032596	2.27556	1.84888e-15	Uba7	ubiquitin-like modifier activating enzyme 7 [Source:MGI Symbol;Acc:MGI:1349462]
96	ENSMUSG00000091649	4.13929	5.80333e-15	Phf11b	PHD finger protein 11B [Source:MGI Symbol;Acc:MGI:3645789]
97	ENSMUSG00000017830	2.76536	5.95993e-15	Dhx58	DEXH (Asp-Glu-X-His) box polypeptide 58 [Source:MGI Symbol;Acc:MGI:1931560]
98	ENSMUSG00000069874	1.96243	6.47607e-15	Irgm2	immunity-related GTPase family M member 2 [Source:MGI Symbol;Acc:MGI:1926262]
99	ENSMUSG00000066861	4.32604	7.16252e-15	Oas1g	2'-5' oligoadenylate synthetase 1G [Source:MGI Symbol;Acc:MGI:97429]
100	ENSMUSG00000020638	1.24969	7.38626e-15	Cmpk2	cytidine monophosphate (UMP-CMP) kinase 2, mitochondrial [Source:MGI Symbol;Acc:MGI:99830]
101	ENSMUSG00000000682	3.31507	7.52816e-15	Cd52	CD52 antigen [Source:MGI Symbol;Acc:MGI:1346088]
102	ENSMUSG00000023905	1.51496	8.59072e-15	Tnfrsf12a	tumor necrosis factor receptor superfamily, member 12a [Source:MGI Symbol;Acc:MGI:1351484]
103	ENSMUSG00000003379	4.2364	9.83999e-15	Cd79a	CD79A antigen (immunoglobulin-associated alpha) [Source:MGI Symbol;Acc:MGI:101774]
104	ENSMUSG00000031026	0.728275	1.03118e-14	Trim66	tripartite motif-containing 66 [Source:MGI Symbol;Acc:MGI:2152406]
105	ENSMUSG00000037405	2.15236	1.55822e-14	Icam1	intercellular adhesion molecule 1 [Source:MGI Symbol;Acc:MGI:96392]
106	ENSMUSG00000040253	2.72801	1.65877e-14	Gbp7	guanylate binding protein 7 [Source:MGI Symbol;Acc:MGI:2444421]
107	ENSMUSG00000026814	0.714636	1.82832e-14	Eng	endoglin [Source:MGI Symbol;Acc:MGI:95392]
108	ENSMUSG00000046879	2.83646	4.74171e-14	Irgm1	immunity-related GTPase family M member 1 [Source:MGI Symbol;Acc:MGI:107567]
109	ENSMUSG00000023341	3.78142	4.92804e-14	Mx2	MX dynamin-like GTPase 2 [Source:MGI Symbol;Acc:MGI:97244]
110	ENSMUSG00000030609	1.1815	7.36088e-14	Aen	apoptosis enhancing nuclease [Source:MGI Symbol;Acc:MGI:1915298]
111	ENSMUSG00000000275	1.66625	7.53806e-14	Trim25	tripartite motif-containing 25 [Source:MGI Symbol;Acc:MGI:102749]
112	ENSMUSG00000056501	1.30713	8.21056e-14	Cebpb	CCAAT/enhancer binding protein (C/EBP), beta [Source:MGI Symbol;Acc:MGI:88373]
113	ENSMUSG00000015947	1.86673	8.47798e-14	Fcgr1	Fc receptor, IgG, high affinity I [Source:MGI Symbol;Acc:MGI:95498]
114	ENSMUSG00000036964	1.68775	8.66363e-14	Trim17	tripartite motif-containing 17 [Source:MGI Symbol;Acc:MGI:1861440]
115	ENSMUSG00000001403	2.92483	1.07933e-13	Ube2c	ubiquitin-conjugating enzyme E2C [Source:MGI Symbol;Acc:MGI:1915862]
116	ENSMUSG00000091405	2.29678	1.11725e-13	Hist2h4	H4 clustered histone 14 [Source:MGI Symbol;Acc:MGI:2140113]
117	ENSMUSG00000052776	4.39412	1.22332e-13	Oas1a	2'-5' oligoadenylate synthetase 1A [Source:MGI Symbol;Acc:MGI:2180860]
118	ENSMUSG00000024737	2.98568	1.25441e-13	Slc15a3	solute carrier family 15, member 3 [Source:MGI Symbol;Acc:MGI:1929691]
119	ENSMUSG00000078920	3.09856	1.69786e-13	Ifi47	interferon gamma inducible protein 47 [Source:MGI Symbol;Acc:MGI:99448]
120	ENSMUSG00000001930	0.935228	1.97373e-13	Vwf	Von Willebrand factor [Source:MGI Symbol;Acc:MGI:98941]
121	ENSMUSG00000041313	0.749949	2.54958e-13	Slc7a1	solute carrier family 7 (cationic amino acid transporter, y+ system), member 1 [Source:MGI Symbol;Acc:MGI:88117]
122	ENSMUSG00000029605	4.62871	2.87067e-13	Oas1b	2'-5' oligoadenylate synthetase 1B [Source:MGI Symbol;Acc:MGI:97430]
123	ENSMUSG00000108414	1.34576	3.00634e-13	Snhg1	small nucleolar RNA host gene 1 [Source:MGI Symbol;Acc:MGI:3763743]
124	ENSMUSG00000044471	2.21685	3.00634e-13	Lncpint	long non-protein coding RNA, Trp53 induced transcript [Source:MGI Symbol;Acc:MGI:2673128]
125	ENSMUSG00000010755	0.624511	3.05071e-13	Cars	cysteinyl-tRNA synthetase [Source:MGI Symbol;Acc:MGI:1351477]
126	ENSMUSG00000038539	1.14822	3.54107e-13	Atf5	activating transcription factor 5 [Source:MGI Symbol;Acc:MGI:2141857]
127	ENSMUSG00000040296	2.61548	4.00451e-13	Ddx58	RNA sensor RIG-I [Source:MGI Symbol;Acc:MGI:2442858]
128	ENSMUSG00000006519	1.94004	5.33548e-13	Cyba	cytochrome b-245, alpha polypeptide [Source:MGI Symbol;Acc:MGI:1316658]
129	ENSMUSG00000045932	2.19888	1.09852e-12	Ifit2	interferon-induced protein with tetratricopeptide repeats 2 [Source:MGI Symbol;Acc:MGI:99449]
130	ENSMUSG00000024308	1.21836	1.19283e-12	Tapbp	TAP binding protein [Source:MGI Symbol;Acc:MGI:1201689]
131	ENSMUSG00000035929	3.1448	1.19283e-12	H2-Q4	histocompatibility 2, Q region locus 4 [Source:MGI Symbol;Acc:MGI:95933]
132	ENSMUSG00000040354	0.6827	1.22893e-12	Mars	methionine-tRNA synthetase 1 [Source:MGI Symbol;Acc:MGI:1345633]
133	ENSMUSG00000037428	0.678445	1.79003e-12	Vgf	VGF nerve growth factor inducible [Source:MGI Symbol;Acc:MGI:1343180]
134	ENSMUSG00000001467	-0.600007	1.83257e-12	Cyp51	cytochrome P450, family 51 [Source:MGI Symbol;Acc:MGI:106040]
135	ENSMUSG00000027078	2.0823	2.01363e-12	Ube2l6	ubiquitin-conjugating enzyme E2L 6 [Source:MGI Symbol;Acc:MGI:1914500]
136	ENSMUSG00000064358	-0.986303	2.36761e-12	mt-Co3	mitochondrially encoded cytochrome c oxidase III [Source:MGI Symbol;Acc:MGI:102502]
137	ENSMUSG00000046480	-0.900046	2.86541e-12	Scn4b	sodium channel, type IV, beta [Source:MGI Symbol;Acc:MGI:2687406]
138	ENSMUSG00000042678	3.56284	2.8662e-12	Myo15	myosin XVA [Source:MGI Symbol;Acc:MGI:1261811]
139	ENSMUSG00000032128	0.779534	3.69349e-12	Robo3	roundabout guidance receptor 3 [Source:MGI Symbol;Acc:MGI:1343102]
140	ENSMUSG00000015340	2.67285	5.2448e-12	Cybb	cytochrome b-245, beta polypeptide [Source:MGI Symbol;Acc:MGI:88574]
141	ENSMUSG00000054072	4.43331	6.52392e-12	Iigp1	interferon inducible GTPase 1 [Source:MGI Symbol;Acc:MGI:1926259]
142	ENSMUSG00000038550	0.966237	7.07679e-12	Ciart	circadian associated repressor of transcription [Source:MGI Symbol;Acc:MGI:2684975]
143	ENSMUSG00000029752	0.63905	7.70294e-12	Asns	asparagine synthetase [Source:MGI Symbol;Acc:MGI:1350929]
144	ENSMUSG00000047281	1.63785	8.01269e-12	Sfn	stratifin [Source:MGI Symbol;Acc:MGI:1891831]
145	ENSMUSG00000020437	2.80618	8.11006e-12	Myo1g	myosin IG [Source:MGI Symbol;Acc:MGI:1927091]
146	ENSMUSG00000027489	-0.875028	8.77137e-12	Necab3	N-terminal EF-hand calcium binding protein 3 [Source:MGI Symbol;Acc:MGI:1861721]
147	ENSMUSG00000020142	0.677597	8.96428e-12	Slc1a4	solute carrier family 1 (glutamate/neutral amino acid transporter), member 4 [Source:MGI Symbol;Acc:MGI:2135601]
148	ENSMUSG00000073490	4.2498	1.24082e-11	Ifi207	interferon activated gene 207 [Source:MGI Symbol;Acc:MGI:2138302]
149	ENSMUSG00000037849	8.20634	1.31963e-11	Ifi206	interferon activated gene 206 [Source:MGI Symbol;Acc:MGI:3646410]
150	ENSMUSG00000029471	-0.739868	1.41104e-11	Camkk2	calcium/calmodulin-dependent protein kinase kinase 2, beta [Source:MGI Symbol;Acc:MGI:2444812]
151	ENSMUSG00000063268	2.25662	1.49018e-11	Parp10	poly (ADP-ribose) polymerase family, member 10 [Source:MGI Symbol;Acc:MGI:3712326]
152	ENSMUSG00000086782	1.22798	1.80348e-11	E130102H24Rik	RIKEN cDNA E130102H24 gene [Source:MGI Symbol;Acc:MGI:1925116]
153	ENSMUSG00000092274	0.955415	2.09019e-11	Neat1	nuclear paraspeckle assembly transcript 1 (non-protein coding) [Source:MGI Symbol;Acc:MGI:1914211]
154	ENSMUSG00000085156	1.71694	2.20461e-11	Snhg15	small nucleolar RNA host gene 15 [Source:MGI Symbol;Acc:MGI:3650059]
155	ENSMUSG00000061232	2.37826	2.31853e-11	H2-K1	histocompatibility 2, K1, K region [Source:MGI Symbol;Acc:MGI:95904]
156	ENSMUSG00000025221	-0.76029	2.83083e-11	Kcnip2	Kv channel-interacting protein 2 [Source:MGI Symbol;Acc:MGI:2135916]
157	ENSMUSG00000052160	1.6884	3.13989e-11	Pld4	phospholipase D family, member 4 [Source:MGI Symbol;Acc:MGI:2144765]
158	ENSMUSG00000010358	2.10132	4.17232e-11	Ifi35	interferon-induced protein 35 [Source:MGI Symbol;Acc:MGI:1917360]
159	ENSMUSG00000009585	1.84253	4.21535e-11	Apobec3	apolipoprotein B mRNA editing enzyme, catalytic polypeptide 3 [Source:MGI Symbol;Acc:MGI:1933111]
160	ENSMUSG00000020256	1.25436	4.21535e-11	Aldh1l2	aldehyde dehydrogenase 1 family, member L2 [Source:MGI Symbol;Acc:MGI:2444680]
161	ENSMUSG00000007029	0.618033	4.22092e-11	Vars	valyl-tRNA synthetase [Source:MGI Symbol;Acc:MGI:90675]
162	ENSMUSG00000001739	3.94613	4.22092e-11	Cldn15	claudin 15 [Source:MGI Symbol;Acc:MGI:1913103]
163	ENSMUSG00000063286	1.78539	4.30023e-11	Gm8995	GTPase, very large interferon inducible, pseudogene 7 [Source:MGI Symbol;Acc:MGI:3644223]
164	ENSMUSG00000093688	5.34638	4.95337e-11	Gm8488	predicted gene 8488 [Source:MGI Symbol;Acc:MGI:3644909]
165	ENSMUSG00000073411	2.31656	5.596e-11	H2-D1	histocompatibility 2, D region locus 1 [Source:MGI Symbol;Acc:MGI:95896]
166	ENSMUSG00000025017	2.20925	6.79041e-11	Pik3ap1	phosphoinositide-3-kinase adaptor protein 1 [Source:MGI Symbol;Acc:MGI:1933177]
167	ENSMUSG00000033909	0.610379	7.57118e-11	Usp36	ubiquitin specific peptidase 36 [Source:MGI Symbol;Acc:MGI:1919594]
168	ENSMUSG00000032661	4.05359	7.57118e-11	Oas3	2'-5' oligoadenylate synthetase 3 [Source:MGI Symbol;Acc:MGI:2180850]
169	ENSMUSG00000093507	2.60154	8.12085e-11	Gm20627	predicted gene 20627 [Source:MGI Symbol;Acc:MGI:5313074]
170	ENSMUSG00000028459	3.01467	9.57767e-11	Cd72	CD72 antigen [Source:MGI Symbol;Acc:MGI:88345]
171	ENSMUSG00000057143	1.73258	9.65467e-11	Trim12c	tripartite motif-containing 12C [Source:MGI Symbol;Acc:MGI:4821183]
172	ENSMUSG00000051359	-0.596561	1.00864e-10	Ncald	neurocalcin delta [Source:MGI Symbol;Acc:MGI:1196326]
173	ENSMUSG00000037851	0.642024	1.02844e-10	Iars	isoleucine-tRNA synthetase [Source:MGI Symbol;Acc:MGI:2145219]
174	ENSMUSG00000022241	0.687879	1.088e-10	Tars	threonyl-tRNA synthetase [Source:MGI Symbol;Acc:MGI:106314]
175	ENSMUSG00000021668	1.07797	1.12517e-10	Polk	polymerase (DNA directed), kappa [Source:MGI Symbol;Acc:MGI:1349767]
176	ENSMUSG00000067212	1.90674	1.41807e-10	H2-T23	histocompatibility 2, T region locus 23 [Source:MGI Symbol;Acc:MGI:95957]
177	ENSMUSG00000041736	1.76879	1.49807e-10	Tspo	translocator protein [Source:MGI Symbol;Acc:MGI:88222]
178	ENSMUSG00000073409	3.94712	1.62455e-10	H2-Q6	histocompatibility 2, Q region locus 6 [Source:MGI Symbol;Acc:MGI:95935]
179	ENSMUSG00000025007	0.653022	1.68711e-10	Aldh18a1	aldehyde dehydrogenase 18 family, member A1 [Source:MGI Symbol;Acc:MGI:1888908]
180	ENSMUSG00000038742	1.33194	1.82874e-10	Angptl6	angiopoietin-like 6 [Source:MGI Symbol;Acc:MGI:1917976]
181	ENSMUSG00000044468	1.82763	1.82874e-10	Tent5c	terminal nucleotidyltransferase 5C [Source:MGI Symbol;Acc:MGI:1921895]
182	ENSMUSG00000038530	-0.719309	1.93003e-10	Rgs4	regulator of G-protein signaling 4 [Source:MGI Symbol;Acc:MGI:108409]
183	ENSMUSG00000024079	2.18409	1.93003e-10	Eif2ak2	eukaryotic translation initiation factor 2-alpha kinase 2 [Source:MGI Symbol;Acc:MGI:1353449]
184	ENSMUSG00000029446	0.884331	1.96264e-10	Psph	phosphoserine phosphatase [Source:MGI Symbol;Acc:MGI:97788]
185	ENSMUSG00000089718	4.48884	2.02156e-10	2310075C17Rik	RIKEN cDNA 2310075C17 gene [Source:MGI Symbol;Acc:MGI:1917444]
186	ENSMUSG00000003283	1.53551	2.52974e-10	Hck	hemopoietic cell kinase [Source:MGI Symbol;Acc:MGI:96052]
187	ENSMUSG00000056116	1.2541	2.80386e-10	H2-T22	histocompatibility 2, T region locus 22 [Source:MGI Symbol;Acc:MGI:95956]
188	ENSMUSG00000049044	-0.825299	3.35551e-10	Rapgef4	Rap guanine nucleotide exchange factor (GEF) 4 [Source:MGI Symbol;Acc:MGI:1917723]
189	ENSMUSG00000031604	-0.681813	3.42929e-10	Msmo1	methylsterol monoxygenase 1 [Source:MGI Symbol;Acc:MGI:1913484]
190	ENSMUSG00000021273	-0.627293	4.46674e-10	Fdft1	farnesyl diphosphate farnesyl transferase 1 [Source:MGI Symbol;Acc:MGI:102706]
191	ENSMUSG00000005413	1.52108	4.63097e-10	Hmox1	heme oxygenase 1 [Source:MGI Symbol;Acc:MGI:96163]
192	ENSMUSG00000037010	-0.739043	4.80328e-10	Apln	apelin [Source:MGI Symbol;Acc:MGI:1353624]
193	ENSMUSG00000062727	7.39571	5.05497e-10	Hist1h2bk	H2B clustered histone 12 [Source:MGI Symbol;Acc:MGI:2448399]
194	ENSMUSG00000069302	7.7638	5.05497e-10	Hist1h2ah	H2A clustered histone 12 [Source:MGI Symbol;Acc:MGI:2448295]
195	ENSMUSG00000040428	1.46957	5.66142e-10	Plekha4	pleckstrin homology domain containing, family A (phosphoinositide binding specific) member 4 [Source:MGI Symbol;Acc:MGI:1916467]
196	ENSMUSG00000023883	0.595898	5.8079e-10	Phf10	PHD finger protein 10 [Source:MGI Symbol;Acc:MGI:1919307]
197	ENSMUSG00000032515	1.05036	6.11689e-10	Csrnp1	cysteine-serine-rich nuclear protein 1 [Source:MGI Symbol;Acc:MGI:2387989]
198	ENSMUSG00000024339	1.42856	6.96898e-10	Tap2	transporter 2, ATP-binding cassette, sub-family B (MDR/TAP) [Source:MGI Symbol;Acc:MGI:98484]
199	ENSMUSG00000028794	3.03532	7.16886e-10	A3galt2	alpha 1,3-galactosyltransferase 2 (isoglobotriaosylceramide synthase) [Source:MGI Symbol;Acc:MGI:2685279]
200	ENSMUSG00000102030	5.70515	8.68378e-10	Gm29106	predicted gene 29106 [Source:MGI Symbol;Acc:MGI:5579812]
201	ENSMUSG00000027962	0.770328	9.64162e-10	Vcam1	vascular cell adhesion molecule 1 [Source:MGI Symbol;Acc:MGI:98926]
202	ENSMUSG00000026395	1.93777	9.73548e-10	Ptprc	protein tyrosine phosphatase, receptor type, C [Source:MGI Symbol;Acc:MGI:97810]
203	ENSMUSG00000067879	-0.877864	1.11229e-09	Vxn	vexin [Source:MGI Symbol;Acc:MGI:1924232]
204	ENSMUSG00000110350	6.30182	1.11229e-09	Gm10252	predicted gene 10252 [Source:MGI Symbol;Acc:MGI:3704292]
205	ENSMUSG00000020892	1.28724	1.17779e-09	Aloxe3	arachidonate lipoxygenase 3 [Source:MGI Symbol;Acc:MGI:1345140]
206	ENSMUSG00000036587	3.64258	1.24344e-09	Fut7	fucosyltransferase 7 [Source:MGI Symbol;Acc:MGI:107692]
207	ENSMUSG00000014599	0.987962	1.24372e-09	Csf1	colony stimulating factor 1 (macrophage) [Source:MGI Symbol;Acc:MGI:1339753]
208	ENSMUSG00000042377	5.03298	1.29417e-09	Fam83g	family with sequence similarity 83, member G [Source:MGI Symbol;Acc:MGI:1916890]
209	ENSMUSG00000068245	3.92788	1.29561e-09	Phf11d	PHD finger protein 11D [Source:MGI Symbol;Acc:MGI:1277133]
210	ENSMUSG00000093930	-0.770024	1.30647e-09	Hmgcs1	3-hydroxy-3-methylglutaryl-Coenzyme A synthase 1 [Source:MGI Symbol;Acc:MGI:107592]
211	ENSMUSG00000024008	-0.691834	1.38049e-09	Cpne5	copine V [Source:MGI Symbol;Acc:MGI:2385908]
212	ENSMUSG00000096727	2.37939	1.40963e-09	Psmb9	proteasome (prosome, macropain) subunit, beta type 9 (large multifunctional peptidase 2) [Source:MGI Symbol;Acc:MGI:1346526]
213	ENSMUSG00000030966	1.90793	1.46248e-09	Trim21	tripartite motif-containing 21 [Source:MGI Symbol;Acc:MGI:106657]
214	ENSMUSG00000019122	2.60797	1.63967e-09	Ccl9	chemokine (C-C motif) ligand 9 [Source:MGI Symbol;Acc:MGI:104533]
215	ENSMUSG00000041515	1.62172	1.65875e-09	Irf8	interferon regulatory factor 8 [Source:MGI Symbol;Acc:MGI:96395]
216	ENSMUSG00000058454	-0.613983	1.70615e-09	Dhcr7	7-dehydrocholesterol reductase [Source:MGI Symbol;Acc:MGI:1298378]
217	ENSMUSG00000070034	2.64966	1.70728e-09	Sp110	Sp110 nuclear body protein [Source:MGI Symbol;Acc:MGI:1923364]
218	ENSMUSG00000064363	-0.69323	1.88328e-09	mt-Nd4	mitochondrially encoded NADH dehydrogenase 4 [Source:MGI Symbol;Acc:MGI:102498]
219	ENSMUSG00000056144	2.04087	2.04021e-09	Trim34a	tripartite motif-containing 34A [Source:MGI Symbol;Acc:MGI:2137359]
220	ENSMUSG00000027322	2.56078	2.18358e-09	Siglec1	sialic acid binding Ig-like lectin 1, sialoadhesin [Source:MGI Symbol;Acc:MGI:99668]
221	ENSMUSG00000030921	3.10514	2.1889e-09	Trim30a	tripartite motif-containing 30A [Source:MGI Symbol;Acc:MGI:98178]
222	ENSMUSG00000054871	-0.758187	2.20261e-09	Tmem158	transmembrane protein 158 [Source:MGI Symbol;Acc:MGI:1919559]
223	ENSMUSG00000027270	-0.710033	2.30817e-09	Lamp5	lysosomal-associated membrane protein family, member 5 [Source:MGI Symbol;Acc:MGI:1923411]
224	ENSMUSG00000032172	-0.63095	2.32914e-09	Olfm2	olfactomedin 2 [Source:MGI Symbol;Acc:MGI:3045350]
225	ENSMUSG00000068696	-0.958156	3.09012e-09	Gpr88	G-protein coupled receptor 88 [Source:MGI Symbol;Acc:MGI:1927653]
226	ENSMUSG00000026536	6.15542	4.13941e-09	Ifi211	interferon activated gene 211 [Source:MGI Symbol;Acc:MGI:3041120]
227	ENSMUSG00000020120	1.3566	4.76318e-09	Plek	pleckstrin [Source:MGI Symbol;Acc:MGI:1860485]
228	ENSMUSG00000020932	2.46166	4.8274e-09	Gfap	glial fibrillary acidic protein [Source:MGI Symbol;Acc:MGI:95697]
229	ENSMUSG00000042828	2.81586	4.8274e-09	Trim72	tripartite motif-containing 72 [Source:MGI Symbol;Acc:MGI:3612190]
230	ENSMUSG00000032259	-0.881563	5.57256e-09	Drd2	dopamine receptor D2 [Source:MGI Symbol;Acc:MGI:94924]
231	ENSMUSG00000078922	3.04959	6.3723e-09	Tgtp1	T cell specific GTPase 1 [Source:MGI Symbol;Acc:MGI:98734]
232	ENSMUSG00000098112	1.58381	6.65718e-09	Bin2	bridging integrator 2 [Source:MGI Symbol;Acc:MGI:3611448]
233	ENSMUSG00000028859	1.59593	7.10361e-09	Csf3r	colony stimulating factor 3 receptor (granulocyte) [Source:MGI Symbol;Acc:MGI:1339755]
234	ENSMUSG00000079363	1.67534	9.72788e-09	Gbp4	guanylate binding protein 4 [Source:MGI Symbol;Acc:MGI:97072]
235	ENSMUSG00000035208	2.99007	9.73064e-09	Slfn8	schlafen 8 [Source:MGI Symbol;Acc:MGI:2672859]
236	ENSMUSG00000036306	-0.595682	1.09535e-08	Lzts1	leucine zipper, putative tumor suppressor 1 [Source:MGI Symbol;Acc:MGI:2684762]
237	ENSMUSG00000065537	1.9262	1.11808e-08	Mir132	microRNA 132 [Source:MGI Symbol;Acc:MGI:2676817]
238	ENSMUSG00000100862	-0.872591	1.22726e-08	Gm10925	predicted gene 10925 [Source:MGI Symbol;Acc:MGI:3809095]
239	ENSMUSG00000029798	1.36643	1.22726e-08	Herc6	hect domain and RLD 6 [Source:MGI Symbol;Acc:MGI:1914388]
240	ENSMUSG00000060981	2.6242	1.33812e-08	Hist1h4h	H4 clustered histone 8 [Source:MGI Symbol;Acc:MGI:2448427]
241	ENSMUSG00000025140	1.46806	1.35821e-08	Pycr1	pyrroline-5-carboxylate reductase 1 [Source:MGI Symbol;Acc:MGI:2384795]
242	ENSMUSG00000034472	-0.650323	1.38887e-08	Rasd2	RASD family, member 2 [Source:MGI Symbol;Acc:MGI:1922391]
243	ENSMUSG00000101111	-0.773011	1.5229e-08	Gm28437	predicted gene 28437 [Source:MGI Symbol;Acc:MGI:5579143]
244	ENSMUSG00000025515	3.4271	1.5795e-08	Muc2	mucin 2 [Source:MGI Symbol;Acc:MGI:1339364]
245	ENSMUSG00000003873	0.749249	1.65653e-08	Bax	BCL2-associated X protein [Source:MGI Symbol;Acc:MGI:99702]
246	ENSMUSG00000033594	-0.692908	1.66217e-08	Spata2l	spermatogenesis associated 2-like [Source:MGI Symbol;Acc:MGI:1926029]
247	ENSMUSG00000067455	3.13621	2.03872e-08	Hist1h4j	H4 clustered histone 11 [Source:MGI Symbol;Acc:MGI:2448436]
248	ENSMUSG00000066258	1.73265	2.05311e-08	Trim12a	tripartite motif-containing 12A [Source:MGI Symbol;Acc:MGI:1923931]
249	ENSMUSG00000030789	5.57384	2.2162e-08	Itgax	integrin alpha X [Source:MGI Symbol;Acc:MGI:96609]
250	ENSMUSG00000040174	0.904543	2.59896e-08	Alkbh3	alkB homolog 3, alpha-ketoglutarate-dependent dioxygenase [Source:MGI Symbol;Acc:MGI:1916363]
251	ENSMUSG00000004266	1.57261	2.80013e-08	Ptpn6	protein tyrosine phosphatase, non-receptor type 6 [Source:MGI Symbol;Acc:MGI:96055]
252	ENSMUSG00000025225	1.2361	3.05868e-08	Nfkb2	nuclear factor of kappa light polypeptide gene enhancer in B cells 2, p49/p100 [Source:MGI Symbol;Acc:MGI:1099800]
253	ENSMUSG00000022014	2.20607	3.1448e-08	Epsti1	epithelial stromal interaction 1 (breast) [Source:MGI Symbol;Acc:MGI:1915168]
254	ENSMUSG00000027907	1.37977	3.30321e-08	S100a11	S100 calcium binding protein A11 [Source:MGI Symbol;Acc:MGI:1338798]
255	ENSMUSG00000022831	1.78368	3.41223e-08	Hcls1	hematopoietic cell specific Lyn substrate 1 [Source:MGI Symbol;Acc:MGI:104568]
256	ENSMUSG00000001123	2.20398	3.42651e-08	Lgals9	lectin, galactose binding, soluble 9 [Source:MGI Symbol;Acc:MGI:109496]
257	ENSMUSG00000060802	2.12866	3.7171e-08	B2m	beta-2 microglobulin [Source:MGI Symbol;Acc:MGI:88127]
258	ENSMUSG00000069516	1.34271	3.85533e-08	Lyz2	lysozyme 2 [Source:MGI Symbol;Acc:MGI:96897]
259	ENSMUSG00000060639	2.97185	4.0296e-08	Hist1h4i	H4 clustered histone 9 [Source:MGI Symbol;Acc:MGI:2448432]
260	ENSMUSG00000061482	3.64172	4.23855e-08	Hist1h4d	H4 clustered histone 4 [Source:MGI Symbol;Acc:MGI:2448423]
261	ENSMUSG00000079293	4.84059	4.31619e-08	Clec7a	C-type lectin domain family 7, member a [Source:MGI Symbol;Acc:MGI:1861431]
262	ENSMUSG00000110622	3.2622	4.35332e-08	Iqcn	IQ motif containing N [Source:MGI Symbol;Acc:MGI:3708784]
263	ENSMUSG00000112854	3.9623	4.47492e-08	Gm38403	predicted gene, 38403 [Source:MGI Symbol;Acc:MGI:5621288]
264	ENSMUSG00000082292	4.17299	5.47353e-08	Gm12250	predicted gene 12250 [Source:MGI Symbol;Acc:MGI:3649299]
265	ENSMUSG00000041827	6.3393	5.53342e-08	Oasl1	2'-5' oligoadenylate synthetase-like 1 [Source:MGI Symbol;Acc:MGI:2180849]
266	ENSMUSG00000030895	2.64693	5.76604e-08	Hpx	hemopexin [Source:MGI Symbol;Acc:MGI:105112]
267	ENSMUSG00000078921	2.41749	5.93186e-08	Tgtp2	T cell specific GTPase 2 [Source:MGI Symbol;Acc:MGI:3710083]
268	ENSMUSG00000001750	0.966073	7.45757e-08	Tcirg1	T cell, immune regulator 1, ATPase, H+ transporting, lysosomal V0 protein A3 [Source:MGI Symbol;Acc:MGI:1350931]
269	ENSMUSG00000052565	3.48925	7.52827e-08	Hist1h1d	H1.3 linker histone, cluster member [Source:MGI Symbol;Acc:MGI:107502]
270	ENSMUSG00000032359	1.1298	7.54429e-08	Ctsh	cathepsin H [Source:MGI Symbol;Acc:MGI:107285]
271	ENSMUSG00000002111	1.44866	7.82034e-08	Spi1	spleen focus forming virus (SFFV) proviral integration oncogene [Source:MGI Symbol;Acc:MGI:98282]
272	ENSMUSG00000054582	2.96325	9.33764e-08	Pabpc1l	poly(A) binding protein, cytoplasmic 1-like [Source:MGI Symbol;Acc:MGI:1922908]
273	ENSMUSG00000026480	1.54536	9.35916e-08	Ncf2	neutrophil cytosolic factor 2 [Source:MGI Symbol;Acc:MGI:97284]
274	ENSMUSG00000064370	-0.674506	9.79562e-08	mt-Cytb	mitochondrially encoded cytochrome b [Source:MGI Symbol;Acc:MGI:102501]
275	ENSMUSG00000040435	0.955622	9.79562e-08	Ppp1r15a	protein phosphatase 1, regulatory subunit 15A [Source:MGI Symbol;Acc:MGI:1927072]
276	ENSMUSG00000039158	1.04881	9.90101e-08	Akna	AT-hook transcription factor [Source:MGI Symbol;Acc:MGI:2140340]
277	ENSMUSG00000042417	1.50907	1.03861e-07	Ccno	cyclin O [Source:MGI Symbol;Acc:MGI:2145534]
278	ENSMUSG00000054404	1.21893	1.06938e-07	Slfn5	schlafen 5 [Source:MGI Symbol;Acc:MGI:1329004]
279	ENSMUSG00000002983	1.09113	1.06938e-07	Relb	avian reticuloendotheliosis viral (v-rel) oncogene related B [Source:MGI Symbol;Acc:MGI:103289]
280	ENSMUSG00000020695	1.13403	1.12899e-07	Mrc2	mannose receptor, C type 2 [Source:MGI Symbol;Acc:MGI:107818]
281	ENSMUSG00000046093	-0.619506	1.22216e-07	Hpcal4	hippocalcin-like 4 [Source:MGI Symbol;Acc:MGI:2157521]
282	ENSMUSG00000024397	1.41542	1.23438e-07	Aif1	allograft inflammatory factor 1 [Source:MGI Symbol;Acc:MGI:1343098]
283	ENSMUSG00000024300	1.66268	1.44744e-07	Myo1f	myosin IF [Source:MGI Symbol;Acc:MGI:107711]
284	ENSMUSG00000064345	-0.685289	1.52009e-07	mt-Nd2	mitochondrially encoded NADH dehydrogenase 2 [Source:MGI Symbol;Acc:MGI:102500]
285	ENSMUSG00000034926	-0.645117	1.52009e-07	Dhcr24	24-dehydrocholesterol reductase [Source:MGI Symbol;Acc:MGI:1922004]
286	ENSMUSG00000025647	0.903827	1.62102e-07	Shisa5	shisa family member 5 [Source:MGI Symbol;Acc:MGI:1915044]
287	ENSMUSG00000034636	-0.596934	1.71536e-07	Zyg11b	zyg-ll family member B, cell cycle regulator [Source:MGI Symbol;Acc:MGI:2685277]
288	ENSMUSG00000058258	-1.10737	1.78159e-07	Idi1	isopentenyl-diphosphate delta isomerase [Source:MGI Symbol;Acc:MGI:2442264]
289	ENSMUSG00000061991	7.18771	1.78709e-07	Hist1h2af	H2A clustered histone 10 [Source:MGI Symbol;Acc:MGI:2448309]
290	ENSMUSG00000020326	0.878981	1.78804e-07	Ccng1	cyclin G1 [Source:MGI Symbol;Acc:MGI:102890]
291	ENSMUSG00000035033	-0.699671	2.14061e-07	Tbr1	T-box brain transcription factor 1 [Source:MGI Symbol;Acc:MGI:107404]
292	ENSMUSG00000025591	1.02793	2.46749e-07	Tma16	translation machinery associated 16 [Source:MGI Symbol;Acc:MGI:1913532]
293	ENSMUSG00000029417	5.44977	2.53653e-07	Cxcl9	chemokine (C-X-C motif) ligand 9 [Source:MGI Symbol;Acc:MGI:1352449]
294	ENSMUSG00000040703	-1.03631	2.67396e-07	Cyp2s1	cytochrome P450, family 2, subfamily s, polypeptide 1 [Source:MGI Symbol;Acc:MGI:1921384]
295	ENSMUSG00000048240	-0.677751	2.74237e-07	Gng7	guanine nucleotide binding protein (G protein), gamma 7 [Source:MGI Symbol;Acc:MGI:95787]
296	ENSMUSG00000043439	-0.719795	3.05427e-07	Epop	elongin BC and polycomb repressive complex 2 associated protein [Source:MGI Symbol;Acc:MGI:2143991]
297	ENSMUSG00000007944	-0.876115	3.38197e-07	Ttc9b	tetratricopeptide repeat domain 9B [Source:MGI Symbol;Acc:MGI:1920282]
298	ENSMUSG00000030798	1.3542	3.42938e-07	Cd37	CD37 antigen [Source:MGI Symbol;Acc:MGI:88330]
299	ENSMUSG00000068606	6.6329	3.58217e-07	Gm4841	predicted gene 4841 [Source:MGI Symbol;Acc:MGI:3643814]
300	ENSMUSG00000068129	5.93842	3.58772e-07	Cst7	cystatin F (leukocystatin) [Source:MGI Symbol;Acc:MGI:1298217]
301	ENSMUSG00000001119	-0.800379	3.58926e-07	Col6a1	collagen, type VI, alpha 1 [Source:MGI Symbol;Acc:MGI:88459]
302	ENSMUSG00000029449	-0.581928	3.65255e-07	Rhof	ras homolog family member F (in filopodia) [Source:MGI Symbol;Acc:MGI:1345629]
303	ENSMUSG00000036781	0.744319	3.80979e-07	Rps27l	ribosomal protein S27-like [Source:MGI Symbol;Acc:MGI:1915191]
304	ENSMUSG00000000982	4.50255	3.88944e-07	Ccl3	chemokine (C-C motif) ligand 3 [Source:MGI Symbol;Acc:MGI:98260]
305	ENSMUSG00000041801	0.807677	4.21727e-07	Phlda3	pleckstrin homology like domain, family A, member 3 [Source:MGI Symbol;Acc:MGI:1351485]
306	ENSMUSG00000020038	0.678209	4.21727e-07	Cry1	cryptochrome 1 (photolyase-like) [Source:MGI Symbol;Acc:MGI:1270841]
307	ENSMUSG00000097736	1.951	4.39909e-07	9530059O14Rik	RIKEN cDNA 9530059O14 gene [Source:MGI Symbol;Acc:MGI:2442421]
308	ENSMUSG00000004707	3.29561	4.76286e-07	Ly9	lymphocyte antigen 9 [Source:MGI Symbol;Acc:MGI:96885]
309	ENSMUSG00000116305	1.25997	4.96814e-07	Lncppara	long noncoding RNA near Ppara [Source:MGI Symbol;Acc:MGI:5568843]
310	ENSMUSG00000067736	-1.14588	5.04634e-07	Gm10222	predicted gene 10222 [Source:MGI Symbol;Acc:MGI:3642643]
311	ENSMUSG00000052142	1.54882	5.21945e-07	Rasal3	RAS protein activator like 3 [Source:MGI Symbol;Acc:MGI:2444128]
312	ENSMUSG00000002668	1.66391	5.29284e-07	Dennd1c	DENN/MADD domain containing 1C [Source:MGI Symbol;Acc:MGI:1918035]
313	ENSMUSG00000097743	1.12774	5.78632e-07	Gm16973	predicted gene, 16973 [Source:MGI Symbol;Acc:MGI:4439897]
314	ENSMUSG00000019647	0.931343	5.79614e-07	Sema6a	sema domain, transmembrane domain (TM), and cytoplasmic domain, (semaphorin) 6A [Source:MGI Symbol;Acc:MGI:1203727]
315	ENSMUSG00000003469	-0.615355	5.98094e-07	Phyhip	phytanoyl-CoA hydroxylase interacting protein [Source:MGI Symbol;Acc:MGI:1860417]
316	ENSMUSG00000035258	-0.926138	6.08346e-07	Abi3bp	ABI family member 3 binding protein [Source:MGI Symbol;Acc:MGI:2444583]
317	ENSMUSG00000030560	1.29476	6.23206e-07	Ctsc	cathepsin C [Source:MGI Symbol;Acc:MGI:109553]
318	ENSMUSG00000038235	1.01023	6.31066e-07	F11r	F11 receptor [Source:MGI Symbol;Acc:MGI:1321398]
319	ENSMUSG00000047407	1.97946	6.31066e-07	Tgif1	TGFB-induced factor homeobox 1 [Source:MGI Symbol;Acc:MGI:1194497]
320	ENSMUSG00000029322	3.61941	6.35299e-07	Plac8	placenta-specific 8 [Source:MGI Symbol;Acc:MGI:2445289]
321	ENSMUSG00000027639	0.766706	6.36751e-07	Samhd1	SAM domain and HD domain, 1 [Source:MGI Symbol;Acc:MGI:1927468]
322	ENSMUSG00000018774	1.29761	6.6917e-07	Cd68	CD68 antigen [Source:MGI Symbol;Acc:MGI:88342]
323	ENSMUSG00000022216	0.711357	6.97005e-07	Psme1	proteasome (prosome, macropain) activator subunit 1 (PA28 alpha) [Source:MGI Symbol;Acc:MGI:1096367]
324	ENSMUSG00000049502	2.02032	6.97005e-07	Dtx3l	deltex 3-like, E3 ubiquitin ligase [Source:MGI Symbol;Acc:MGI:2656973]
325	ENSMUSG00000038642	1.84653	7.06827e-07	Ctss	cathepsin S [Source:MGI Symbol;Acc:MGI:107341]
326	ENSMUSG00000091971	1.29958	7.24132e-07	Hspa1a	heat shock protein 1A [Source:MGI Symbol;Acc:MGI:96244]
327	ENSMUSG00000046922	-1.22438	7.86702e-07	Gpr6	G protein-coupled receptor 6 [Source:MGI Symbol;Acc:MGI:2155249]
328	ENSMUSG00000079197	1.0434	8.06073e-07	Psme2	proteasome (prosome, macropain) activator subunit 2 (PA28 beta) [Source:MGI Symbol;Acc:MGI:1096365]
329	ENSMUSG00000057506	0.858687	8.8388e-07	Bloc1s2	biogenesis of lysosomal organelles complex-1, subunit 2 [Source:MGI Symbol;Acc:MGI:1920939]
330	ENSMUSG00000042354	0.586046	9.15565e-07	Gnl3	guanine nucleotide binding protein-like 3 (nucleolar) [Source:MGI Symbol;Acc:MGI:1353651]
331	ENSMUSG00000049401	0.651756	1.01454e-06	Ogfr	opioid growth factor receptor [Source:MGI Symbol;Acc:MGI:1919325]
332	ENSMUSG00000099517	5.47481	1.02746e-06	Hist1h3g	H3 clustered histone 8 [Source:MGI Symbol;Acc:MGI:2145541]
333	ENSMUSG00000028427	6.32427	1.03821e-06	Aqp7	aquaporin 7 [Source:MGI Symbol;Acc:MGI:1314647]
334	ENSMUSG00000020423	0.94896	1.14052e-06	Btg2	BTG anti-proliferation factor 2 [Source:MGI Symbol;Acc:MGI:108384]
335	ENSMUSG00000064351	-0.596013	1.18294e-06	mt-Co1	mitochondrially encoded cytochrome c oxidase I [Source:MGI Symbol;Acc:MGI:102504]
336	ENSMUSG00000035385	5.02966	1.19147e-06	Ccl2	chemokine (C-C motif) ligand 2 [Source:MGI Symbol;Acc:MGI:98259]
337	ENSMUSG00000008601	4.64716	1.19865e-06	Rab25	RAB25, member RAS oncogene family [Source:MGI Symbol;Acc:MGI:1858203]
338	ENSMUSG00000024617	-0.649235	1.2083e-06	Camk2a	calcium/calmodulin-dependent protein kinase II alpha [Source:MGI Symbol;Acc:MGI:88256]
339	ENSMUSG00000018927	2.38061	1.22109e-06	Ccl6	chemokine (C-C motif) ligand 6 [Source:MGI Symbol;Acc:MGI:98263]
340	ENSMUSG00000100131	-1.00409	1.2374e-06	Gm28439	predicted gene 28439 [Source:MGI Symbol;Acc:MGI:5579145]
341	ENSMUSG00000047735	2.07501	1.2374e-06	Samd9l	sterile alpha motif domain containing 9-like [Source:MGI Symbol;Acc:MGI:1343184]
342	ENSMUSG00000071656	1.82874	1.26641e-06	Lrrn4cl	LRRN4 C-terminal like [Source:MGI Symbol;Acc:MGI:1916102]
343	ENSMUSG00000000632	-0.602756	1.29469e-06	Sez6	seizure related gene 6 [Source:MGI Symbol;Acc:MGI:104745]
344	ENSMUSG00000020178	-0.999926	1.39428e-06	Adora2a	adenosine A2a receptor [Source:MGI Symbol;Acc:MGI:99402]
345	ENSMUSG00000022598	6.27408	1.41956e-06	Psca	prostate stem cell antigen [Source:MGI Symbol;Acc:MGI:1919623]
346	ENSMUSG00000040495	-0.691723	1.43607e-06	Chrm4	cholinergic receptor, muscarinic 4 [Source:MGI Symbol;Acc:MGI:88399]
347	ENSMUSG00000018920	1.69483	1.44421e-06	Cxcl16	chemokine (C-X-C motif) ligand 16 [Source:MGI Symbol;Acc:MGI:1932682]
348	ENSMUSG00000030786	1.29507	1.48628e-06	Itgam	integrin alpha M [Source:MGI Symbol;Acc:MGI:96607]
349	ENSMUSG00000079685	3.89216	1.49683e-06	Ulbp1	UL16 binding protein 1 [Source:MGI Symbol;Acc:MGI:1925027]
350	ENSMUSG00000023047	2.0025	1.50762e-06	Amhr2	anti-Mullerian hormone type 2 receptor [Source:MGI Symbol;Acc:MGI:105062]
351	ENSMUSG00000037579	-0.71152	1.58907e-06	Kcnh3	potassium voltage-gated channel, subfamily H (eag-related), member 3 [Source:MGI Symbol;Acc:MGI:1341723]
352	ENSMUSG00000036908	1.1859	1.60028e-06	Unc93b1	unc-93 homolog B1, TLR signaling regulator [Source:MGI Symbol;Acc:MGI:1859307]
353	ENSMUSG00000024451	0.62301	1.73732e-06	Arap3	ArfGAP with RhoGAP domain, ankyrin repeat and PH domain 3 [Source:MGI Symbol;Acc:MGI:2147274]
354	ENSMUSG00000020538	0.6729	1.74917e-06	Srebf1	sterol regulatory element binding transcription factor 1 [Source:MGI Symbol;Acc:MGI:107606]
355	ENSMUSG00000037731	1.73245	1.88634e-06	Themis2	thymocyte selection associated family member 2 [Source:MGI Symbol;Acc:MGI:2446213]
356	ENSMUSG00000058163	3.77781	2.10812e-06	Gm5431	predicted gene 5431 [Source:MGI Symbol;Acc:MGI:3645205]
357	ENSMUSG00000023393	2.26456	2.13067e-06	Slc17a9	solute carrier family 17, member 9 [Source:MGI Symbol;Acc:MGI:1919107]
358	ENSMUSG00000036095	-0.627267	2.13523e-06	Dgkb	diacylglycerol kinase, beta [Source:MGI Symbol;Acc:MGI:2442474]
359	ENSMUSG00000007656	-0.612409	2.15562e-06	Arpp19	cAMP-regulated phosphoprotein 19 [Source:MGI Symbol;Acc:MGI:1891691]
360	ENSMUSG00000025650	1.20296	2.19309e-06	Col7a1	collagen, type VII, alpha 1 [Source:MGI Symbol;Acc:MGI:88462]
361	ENSMUSG00000053560	0.930439	2.20653e-06	Ier2	immediate early response 2 [Source:MGI Symbol;Acc:MGI:104815]
362	ENSMUSG00000022148	1.56789	2.22021e-06	Fyb	FYN binding protein [Source:MGI Symbol;Acc:MGI:1346327]
363	ENSMUSG00000044350	1.23292	2.28514e-06	Lacc1	laccase domain containing 1 [Source:MGI Symbol;Acc:MGI:2445077]
364	ENSMUSG00000027327	-0.62999	2.42029e-06	1700037H04Rik	RIKEN cDNA 1700037H04 gene [Source:MGI Symbol;Acc:MGI:1914576]
365	ENSMUSG00000039997	1.61517	2.42029e-06	Ifi203	interferon activated gene 203 [Source:MGI Symbol;Acc:MGI:96428]
366	ENSMUSG00000064341	-0.593576	2.65994e-06	mt-Nd1	mitochondrially encoded NADH dehydrogenase 1 [Source:MGI Symbol;Acc:MGI:101787]
367	ENSMUSG00000071715	2.47746	2.65994e-06	Ncf4	neutrophil cytosolic factor 4 [Source:MGI Symbol;Acc:MGI:109186]
368	ENSMUSG00000055413	3.38795	2.67232e-06	H2-Q5	histocompatibility 2, Q region locus 5 [Source:MGI Symbol;Acc:MGI:95934]
369	ENSMUSG00000097194	5.30941	2.69922e-06	9330175E14Rik	RIKEN cDNA 9330175E14 gene [Source:MGI Symbol;Acc:MGI:2443913]
370	ENSMUSG00000026946	1.5781	2.82179e-06	Nmi	N-myc (and STAT) interactor [Source:MGI Symbol;Acc:MGI:1928368]
371	ENSMUSG00000027490	-0.908459	2.95691e-06	E2f1	E2F transcription factor 1 [Source:MGI Symbol;Acc:MGI:101941]
372	ENSMUSG00000041670	-0.61786	2.97104e-06	Rims1	regulating synaptic membrane exocytosis 1 [Source:MGI Symbol;Acc:MGI:2152971]
373	ENSMUSG00000104713	3.51685	3.08106e-06	Gbp6	guanylate binding protein 6 [Source:MGI Symbol;Acc:MGI:2140937]
374	ENSMUSG00000035778	1.46192	3.11813e-06	Ggta1	glycoprotein galactosyltransferase alpha 1, 3 [Source:MGI Symbol;Acc:MGI:95704]
375	ENSMUSG00000031207	0.917641	3.22204e-06	Msn	moesin [Source:MGI Symbol;Acc:MGI:97167]
376	ENSMUSG00000032193	-0.731018	3.32921e-06	Ldlr	low density lipoprotein receptor [Source:MGI Symbol;Acc:MGI:96765]
377	ENSMUSG00000030785	0.881734	3.43722e-06	Cox6a2	cytochrome c oxidase subunit 6A2 [Source:MGI Symbol;Acc:MGI:104649]
378	ENSMUSG00000024378	-0.745804	3.44447e-06	Stard4	StAR-related lipid transfer (START) domain containing 4 [Source:MGI Symbol;Acc:MGI:2156764]
379	ENSMUSG00000020130	0.634394	3.48613e-06	Tbc1d15	TBC1 domain family, member 15 [Source:MGI Symbol;Acc:MGI:1913937]
380	ENSMUSG00000033220	1.64408	3.48667e-06	Rac2	Rac family small GTPase 2 [Source:MGI Symbol;Acc:MGI:97846]
381	ENSMUSG00000018899	0.880535	3.57196e-06	Irf1	interferon regulatory factor 1 [Source:MGI Symbol;Acc:MGI:96590]
382	ENSMUSG00000026167	-0.820992	3.72768e-06	Wnt10a	wingless-type MMTV integration site family, member 10A [Source:MGI Symbol;Acc:MGI:108071]
383	ENSMUSG00000036887	1.85274	3.85077e-06	C1qa	complement component 1, q subcomponent, alpha polypeptide [Source:MGI Symbol;Acc:MGI:88223]
384	ENSMUSG00000035042	5.73281	3.85077e-06	Ccl5	chemokine (C-C motif) ligand 5 [Source:MGI Symbol;Acc:MGI:98262]
385	ENSMUSG00000020184	0.741958	4.04559e-06	Mdm2	transformed mouse 3T3 cell double minute 2 [Source:MGI Symbol;Acc:MGI:96952]
386	ENSMUSG00000020447	1.87442	4.22563e-06	Npc1l1	NPC1 like intracellular cholesterol transporter 1 [Source:MGI Symbol;Acc:MGI:2685089]
387	ENSMUSG00000034947	1.83458	4.31954e-06	Tmem106a	transmembrane protein 106A [Source:MGI Symbol;Acc:MGI:1922056]
388	ENSMUSG00000110697	3.0552	4.32977e-06	Gm31718	predicted gene, 31718 [Source:MGI Symbol;Acc:MGI:5590877]
389	ENSMUSG00000008167	0.909448	4.72595e-06	Fbxw9	F-box and WD-40 domain protein 9 [Source:MGI Symbol;Acc:MGI:1915878]
390	ENSMUSG00000032988	1.28273	5.28479e-06	Slc16a8	solute carrier family 16 (monocarboxylic acid transporters), member 8 [Source:MGI Symbol;Acc:MGI:1929519]
391	ENSMUSG00000027196	2.1476	5.3931e-06	Alkbh3os1	alkB homolog 3, opposite strand 1 [Source:MGI Symbol;Acc:MGI:1918102]
392	ENSMUSG00000040751	1.784	5.60932e-06	Lat2	linker for activation of T cells family, member 2 [Source:MGI Symbol;Acc:MGI:1926479]
393	ENSMUSG00000090877	1.06126	6.17501e-06	Hspa1b	heat shock protein 1B [Source:MGI Symbol;Acc:MGI:99517]
394	ENSMUSG00000010797	-1.74358	6.34407e-06	Wnt2	wingless-type MMTV integration site family, member 2 [Source:MGI Symbol;Acc:MGI:98954]
395	ENSMUSG00000026177	1.56012	6.61135e-06	Slc11a1	solute carrier family 11 (proton-coupled divalent metal ion transporters), member 1 [Source:MGI Symbol;Acc:MGI:1345275]
396	ENSMUSG00000036896	1.55313	7.33031e-06	C1qc	complement component 1, q subcomponent, C chain [Source:MGI Symbol;Acc:MGI:88225]
397	ENSMUSG00000030124	2.47311	7.48577e-06	Lag3	lymphocyte-activation gene 3 [Source:MGI Symbol;Acc:MGI:106588]
398	ENSMUSG00000029771	1.14965	7.72107e-06	Irf5	interferon regulatory factor 5 [Source:MGI Symbol;Acc:MGI:1350924]
399	ENSMUSG00000029816	1.51481	7.74612e-06	Gpnmb	glycoprotein (transmembrane) nmb [Source:MGI Symbol;Acc:MGI:1934765]
400	ENSMUSG00000046321	-0.788743	7.94088e-06	Hs3st2	heparan sulfate (glucosamine) 3-O-sulfotransferase 2 [Source:MGI Symbol;Acc:MGI:1333802]
401	ENSMUSG00000020374	-0.60173	8.2562e-06	Rasgef1c	RasGEF domain family, member 1C [Source:MGI Symbol;Acc:MGI:1921813]
402	ENSMUSG00000042608	0.634519	8.30828e-06	Stk40	serine/threonine kinase 40 [Source:MGI Symbol;Acc:MGI:1921428]
403	ENSMUSG00000026628	2.61821	8.30828e-06	Atf3	activating transcription factor 3 [Source:MGI Symbol;Acc:MGI:109384]
404	ENSMUSG00000078945	1.61534	8.45888e-06	Naip2	NLR family, apoptosis inhibitory protein 2 [Source:MGI Symbol;Acc:MGI:1298226]
405	ENSMUSG00000059089	3.48077	8.46329e-06	Fcgr4	Fc receptor, IgG, low affinity IV [Source:MGI Symbol;Acc:MGI:2179523]
406	ENSMUSG00000026355	0.964656	8.61678e-06	Mcm6	minichromosome maintenance complex component 6 [Source:MGI Symbol;Acc:MGI:1298227]
407	ENSMUSG00000027472	0.626821	8.83996e-06	Pdrg1	p53 and DNA damage regulated 1 [Source:MGI Symbol;Acc:MGI:1915809]
408	ENSMUSG00000037447	0.706971	8.90912e-06	Arid5a	AT rich interactive domain 5A (MRF1-like) [Source:MGI Symbol;Acc:MGI:2443039]
409	ENSMUSG00000033644	2.00476	9.29101e-06	Piwil2	piwi-like RNA-mediated gene silencing 2 [Source:MGI Symbol;Acc:MGI:1930036]
410	ENSMUSG00000047180	2.02472	9.84227e-06	Neurl3	neuralized E3 ubiquitin protein ligase 3 [Source:MGI Symbol;Acc:MGI:2429944]
411	ENSMUSG00000032372	1.4967	9.8775e-06	Plscr2	phospholipid scramblase 2 [Source:MGI Symbol;Acc:MGI:1270860]
412	ENSMUSG00000030592	-0.781915	9.96339e-06	Ryr1	ryanodine receptor 1, skeletal muscle [Source:MGI Symbol;Acc:MGI:99659]
413	ENSMUSG00000021423	2.0398	9.98932e-06	Ly86	lymphocyte antigen 86 [Source:MGI Symbol;Acc:MGI:1321404]
414	ENSMUSG00000034997	-0.667497	1.02711e-05	Htr2a	5-hydroxytryptamine (serotonin) receptor 2A [Source:MGI Symbol;Acc:MGI:109521]
415	ENSMUSG00000030341	1.0496	1.05191e-05	Tnfrsf1a	tumor necrosis factor receptor superfamily, member 1a [Source:MGI Symbol;Acc:MGI:1314884]
416	ENSMUSG00000042489	-1.38149	1.05969e-05	Clspn	claspin [Source:MGI Symbol;Acc:MGI:2445153]
417	ENSMUSG00000053158	0.970765	1.08019e-05	Fes	feline sarcoma oncogene [Source:MGI Symbol;Acc:MGI:95514]
418	ENSMUSG00000045318	-0.607683	1.10391e-05	Adra2c	adrenergic receptor, alpha 2c [Source:MGI Symbol;Acc:MGI:87936]
419	ENSMUSG00000085385	0.662777	1.10834e-05	Snhg17	small nucleolar RNA host gene 17 [Source:MGI Symbol;Acc:MGI:1915358]
420	ENSMUSG00000073902	2.98388	1.1772e-05	Gm1966	GTPase, very large interferon inducible, family member 3 [Source:MGI Symbol;Acc:MGI:3584360]
421	ENSMUSG00000051457	3.36449	1.22785e-05	Spn	sialophorin [Source:MGI Symbol;Acc:MGI:98384]
422	ENSMUSG00000071068	2.97819	1.2449e-05	Treml2	triggering receptor expressed on myeloid cells-like 2 [Source:MGI Symbol;Acc:MGI:2147038]
423	ENSMUSG00000035394	2.25923	1.28002e-05	Cfap53	cilia and flagella associated protein 53 [Source:MGI Symbol;Acc:MGI:1921703]
424	ENSMUSG00000058638	0.666254	1.28838e-05	Zfp110	zinc finger protein 110 [Source:MGI Symbol;Acc:MGI:1890378]
425	ENSMUSG00000052374	-0.703048	1.32244e-05	Actn2	actinin alpha 2 [Source:MGI Symbol;Acc:MGI:109192]
426	ENSMUSG00000043008	1.67224	1.41732e-05	Klhl6	kelch-like 6 [Source:MGI Symbol;Acc:MGI:2686922]
427	ENSMUSG00000052658	2.4078	1.46108e-05	5830454E08Rik	RIKEN cDNA 5830454E08 gene [Source:MGI Symbol;Acc:MGI:1923350]
428	ENSMUSG00000021057	-0.692804	1.54271e-05	Akap5	A kinase (PRKA) anchor protein 5 [Source:MGI Symbol;Acc:MGI:2685104]
429	ENSMUSG00000042622	1.31923	1.54271e-05	Maff	v-maf musculoaponeurotic fibrosarcoma oncogene family, protein F (avian) [Source:MGI Symbol;Acc:MGI:96910]
430	ENSMUSG00000027995	2.87674	1.56627e-05	Tlr2	toll-like receptor 2 [Source:MGI Symbol;Acc:MGI:1346060]
431	ENSMUSG00000020434	2.39358	1.67537e-05	4921536K21Rik	RIKEN cDNA 4921536K21 gene [Source:MGI Symbol;Acc:MGI:1914680]
432	ENSMUSG00000075040	0.732201	1.71555e-05	Zfp408	zinc finger protein 408 [Source:MGI Symbol;Acc:MGI:2685857]
433	ENSMUSG00000048310	0.685192	1.74301e-05	Pskh1	protein serine kinase H1 [Source:MGI Symbol;Acc:MGI:3528383]
434	ENSMUSG00000025592	1.56265	1.78193e-05	Dach2	dachshund family transcription factor 2 [Source:MGI Symbol;Acc:MGI:1890446]
435	ENSMUSG00000018930	5.62279	1.79341e-05	Ccl4	chemokine (C-C motif) ligand 4 [Source:MGI Symbol;Acc:MGI:98261]
436	ENSMUSG00000040118	-0.632538	1.86027e-05	Cacna2d1	calcium channel, voltage-dependent, alpha2/delta subunit 1 [Source:MGI Symbol;Acc:MGI:88295]
437	ENSMUSG00000086841	1.07957	1.91029e-05	2410006H16Rik	RIKEN cDNA 2410006H16 gene [Source:MGI Symbol;Acc:MGI:1916471]
438	ENSMUSG00000044827	2.29661	1.95652e-05	Tlr1	toll-like receptor 1 [Source:MGI Symbol;Acc:MGI:1341295]
439	ENSMUSG00000035852	2.19967	2.05034e-05	Misp	mitotic spindle positioning [Source:MGI Symbol;Acc:MGI:1926156]
440	ENSMUSG00000116617	3.07646	2.12563e-05	AC130815.1	predicted gene, 49767 [Source:MGI Symbol;Acc:MGI:6215277]
441	ENSMUSG00000026956	0.643271	2.14704e-05	Uap1l1	UDP-N-acteylglucosamine pyrophosphorylase 1-like 1 [Source:MGI Symbol;Acc:MGI:2443318]
442	ENSMUSG00000036995	1.04623	2.14704e-05	Asap3	ArfGAP with SH3 domain, ankyrin repeat and PH domain 3 [Source:MGI Symbol;Acc:MGI:2684986]
443	ENSMUSG00000059173	-0.65899	2.17061e-05	Pde1a	phosphodiesterase 1A, calmodulin-dependent [Source:MGI Symbol;Acc:MGI:1201792]
444	ENSMUSG00000036905	1.58026	2.19426e-05	C1qb	complement component 1, q subcomponent, beta polypeptide [Source:MGI Symbol;Acc:MGI:88224]
445	ENSMUSG00000039981	3.70743	2.1993e-05	Zc3h12d	zinc finger CCCH type containing 12D [Source:MGI Symbol;Acc:MGI:3045313]
446	ENSMUSG00000090667	-1.55747	2.20375e-05	Gm765	MyoD family inhibitor domain containing 2 [Source:MGI Symbol;Acc:MGI:2685611]
447	ENSMUSG00000026548	2.64168	2.34185e-05	Slamf9	SLAM family member 9 [Source:MGI Symbol;Acc:MGI:1923692]
448	ENSMUSG00000000958	1.30538	2.34443e-05	Slc7a7	solute carrier family 7 (cationic amino acid transporter, y+ system), member 7 [Source:MGI Symbol;Acc:MGI:1337120]
449	ENSMUSG00000028599	1.22554	2.3595e-05	Tnfrsf1b	tumor necrosis factor receptor superfamily, member 1b [Source:MGI Symbol;Acc:MGI:1314883]
450	ENSMUSG00000063234	2.61559	2.36868e-05	Gpr84	G protein-coupled receptor 84 [Source:MGI Symbol;Acc:MGI:1934129]
451	ENSMUSG00000036687	3.02159	2.38738e-05	Tmem184a	transmembrane protein 184a [Source:MGI Symbol;Acc:MGI:2385897]
452	ENSMUSG00000056737	1.54213	2.56441e-05	Capg	capping protein (actin filament), gelsolin-like [Source:MGI Symbol;Acc:MGI:1098259]
453	ENSMUSG00000015133	0.840015	2.57494e-05	Lrrk1	leucine-rich repeat kinase 1 [Source:MGI Symbol;Acc:MGI:2142227]
454	ENSMUSG00000021998	1.14105	2.65643e-05	Lcp1	lymphocyte cytosolic protein 1 [Source:MGI Symbol;Acc:MGI:104808]
455	ENSMUSG00000057346	3.84401	2.82474e-05	Apol9a	apolipoprotein L 9a [Source:MGI Symbol;Acc:MGI:3606001]
456	ENSMUSG00000025534	0.783696	2.87056e-05	Gusb	glucuronidase, beta [Source:MGI Symbol;Acc:MGI:95872]
457	ENSMUSG00000114851	1.67073	2.8883e-05	Gm46409	predicted gene, 46409 [Source:MGI Symbol;Acc:MGI:5826046]
458	ENSMUSG00000026656	1.45342	2.92867e-05	Fcgr2b	Fc receptor, IgG, low affinity IIb [Source:MGI Symbol;Acc:MGI:95499]
459	ENSMUSG00000045441	-0.710578	2.93905e-05	Gprin3	GPRIN family member 3 [Source:MGI Symbol;Acc:MGI:1924785]
460	ENSMUSG00000054675	0.633052	2.96135e-05	Tmem119	transmembrane protein 119 [Source:MGI Symbol;Acc:MGI:2385228]
461	ENSMUSG00000026463	-0.585701	2.96612e-05	Atp2b4	ATPase, Ca++ transporting, plasma membrane 4 [Source:MGI Symbol;Acc:MGI:88111]
462	ENSMUSG00000034116	1.39314	3.04451e-05	Vav1	vav 1 oncogene [Source:MGI Symbol;Acc:MGI:98923]
463	ENSMUSG00000025507	1.75216	3.31127e-05	Pidd1	p53 induced death domain protein 1 [Source:MGI Symbol;Acc:MGI:1889507]
464	ENSMUSG00000038224	3.35508	3.3998e-05	Serpinf2	serine (or cysteine) peptidase inhibitor, clade F, member 2 [Source:MGI Symbol;Acc:MGI:107173]
465	ENSMUSG00000025351	0.601381	3.47923e-05	Cd63	CD63 antigen [Source:MGI Symbol;Acc:MGI:99529]
466	ENSMUSG00000068699	1.42143	3.47923e-05	Flnc	filamin C, gamma [Source:MGI Symbol;Acc:MGI:95557]
467	ENSMUSG00000073771	0.913893	3.5771e-05	Btbd19	BTB (POZ) domain containing 19 [Source:MGI Symbol;Acc:MGI:1925861]
468	ENSMUSG00000093673	2.52659	3.63395e-05	Gm20644	predicted gene 20644 [Source:MGI Symbol;Acc:MGI:5313091]
469	ENSMUSG00000002602	0.830756	3.66852e-05	Axl	AXL receptor tyrosine kinase [Source:MGI Symbol;Acc:MGI:1347244]
470	ENSMUSG00000040613	1.49944	3.7911e-05	Apobec1	apolipoprotein B mRNA editing enzyme, catalytic polypeptide 1 [Source:MGI Symbol;Acc:MGI:103298]
471	ENSMUSG00000036986	0.761585	3.80591e-05	Pml	promyelocytic leukemia [Source:MGI Symbol;Acc:MGI:104662]
472	ENSMUSG00000024965	1.25623	3.86284e-05	Fermt3	fermitin family member 3 [Source:MGI Symbol;Acc:MGI:2147790]
473	ENSMUSG00000096929	0.630045	3.90412e-05	A330023F24Rik	RIKEN cDNA A330023F24 gene [Source:MGI Symbol;Acc:MGI:2443958]
474	ENSMUSG00000038011	1.25511	3.91649e-05	Dnah10	dynein, axonemal, heavy chain 10 [Source:MGI Symbol;Acc:MGI:1860299]
475	ENSMUSG00000111765	-1.64674	4.14472e-05	Gm10635	predicted gene 10635 [Source:MGI Symbol;Acc:MGI:3641740]
476	ENSMUSG00000097572	1.99582	4.14963e-05	Gm26797	predicted gene, 26797 [Source:MGI Symbol;Acc:MGI:5477291]
477	ENSMUSG00000076498	-1.16349	4.2115e-05	Trbc2	T cell receptor beta, constant 2 [Source:MGI Symbol;Acc:MGI:4835227]
478	ENSMUSG00000024912	0.697593	4.23017e-05	Fosl1	fos-like antigen 1 [Source:MGI Symbol;Acc:MGI:107179]
479	ENSMUSG00000028785	-0.59476	4.23182e-05	Hpca	hippocalcin [Source:MGI Symbol;Acc:MGI:1336200]
480	ENSMUSG00000009145	1.77737	4.26734e-05	Dqx1	DEAQ RNA-dependent ATPase [Source:MGI Symbol;Acc:MGI:2136388]
481	ENSMUSG00000021091	2.32274	4.43916e-05	Serpina3n	serine (or cysteine) peptidase inhibitor, clade A, member 3N [Source:MGI Symbol;Acc:MGI:105045]
482	ENSMUSG00000034687	-0.649857	4.44207e-05	Fras1	Fraser extracellular matrix complex subunit 1 [Source:MGI Symbol;Acc:MGI:2385368]
483	ENSMUSG00000054065	3.83842	4.66931e-05	Pkp3	plakophilin 3 [Source:MGI Symbol;Acc:MGI:1891830]
484	ENSMUSG00000040552	1.6898	4.98118e-05	C3ar1	complement component 3a receptor 1 [Source:MGI Symbol;Acc:MGI:1097680]
485	ENSMUSG00000044352	-0.585775	5.00636e-05	Sowaha	sosondowah ankyrin repeat domain family member A [Source:MGI Symbol;Acc:MGI:2687280]
486	ENSMUSG00000039913	-0.603579	5.16374e-05	Pak7	p21 (RAC1) activated kinase 5 [Source:MGI Symbol;Acc:MGI:1920334]
487	ENSMUSG00000030382	1.8833	5.18361e-05	Slc27a5	solute carrier family 27 (fatty acid transporter), member 5 [Source:MGI Symbol;Acc:MGI:1347100]
488	ENSMUSG00000064267	1.58248	5.29374e-05	Hvcn1	hydrogen voltage-gated channel 1 [Source:MGI Symbol;Acc:MGI:1921346]
489	ENSMUSG00000031861	1.17265	5.34485e-05	Lpar2	lysophosphatidic acid receptor 2 [Source:MGI Symbol;Acc:MGI:1858422]
490	ENSMUSG00000030717	0.946054	5.37409e-05	Nupr1	nuclear protein transcription regulator 1 [Source:MGI Symbol;Acc:MGI:1891834]
491	ENSMUSG00000090272	1.50066	5.79907e-05	Mndal	myeloid nuclear differentiation antigen like [Source:MGI Symbol;Acc:MGI:3780953]
492	ENSMUSG00000030499	0.601593	5.80346e-05	Kctd15	potassium channel tetramerisation domain containing 15 [Source:MGI Symbol;Acc:MGI:2385276]
493	ENSMUSG00000018543	2.30887	5.89046e-05	1700001P01Rik	RIKEN cDNA 1700001P01 gene [Source:MGI Symbol;Acc:MGI:1919465]
494	ENSMUSG00000028874	2.84976	5.89046e-05	Fgr	FGR proto-oncogene, Src family tyrosine kinase [Source:MGI Symbol;Acc:MGI:95527]
495	ENSMUSG00000036678	0.856369	5.91574e-05	Aaas	achalasia, adrenocortical insufficiency, alacrimia [Source:MGI Symbol;Acc:MGI:2443767]
496	ENSMUSG00000068259	3.18065	5.91574e-05	Olfr461	olfactory receptor family 9 subfamily A member 7 [Source:MGI Symbol;Acc:MGI:3030295]
497	ENSMUSG00000108985	2.61242	6.07902e-05	A930030B08Rik	RIKEN cDNA A930030B08 gene [Source:MGI Symbol;Acc:MGI:1924443]
498	ENSMUSG00000022901	1.47097	6.14502e-05	Cd86	CD86 antigen [Source:MGI Symbol;Acc:MGI:101773]
499	ENSMUSG00000039079	-1.12879	6.47997e-05	Trhr2	thyrotropin releasing hormone receptor 2 [Source:MGI Symbol;Acc:MGI:2177284]
500	ENSMUSG00000003545	0.593238	6.76381e-05	Fosb	FBJ osteosarcoma oncogene B [Source:MGI Symbol;Acc:MGI:95575]
501	ENSMUSG00000047963	1.52974	6.94027e-05	Stbd1	starch binding domain 1 [Source:MGI Symbol;Acc:MGI:1261768]
502	ENSMUSG00000062007	4.54144	7.20196e-05	Hsh2d	hematopoietic SH2 domain containing [Source:MGI Symbol;Acc:MGI:2676364]
503	ENSMUSG00000031662	1.38603	7.51792e-05	Snx20	sorting nexin 20 [Source:MGI Symbol;Acc:MGI:1918857]
504	ENSMUSG00000052301	-0.707707	7.55502e-05	Doc2a	double C2, alpha [Source:MGI Symbol;Acc:MGI:109446]
505	ENSMUSG00000026547	0.879504	7.59588e-05	Tagln2	transgelin 2 [Source:MGI Symbol;Acc:MGI:1312985]
506	ENSMUSG00000029491	3.22679	7.65205e-05	Pde6b	phosphodiesterase 6B, cGMP, rod receptor, beta polypeptide [Source:MGI Symbol;Acc:MGI:97525]
507	ENSMUSG00000090799	0.650077	7.66756e-05	Klhl33	kelch-like 33 [Source:MGI Symbol;Acc:MGI:3644593]
508	ENSMUSG00000025813	-0.587057	7.81605e-05	Homer2	homer scaffolding protein 2 [Source:MGI Symbol;Acc:MGI:1347354]
509	ENSMUSG00000068246	3.88989	7.93934e-05	Apol9b	apolipoprotein L 9b [Source:MGI Symbol;Acc:MGI:1919148]
510	ENSMUSG00000015355	2.36299	8.2427e-05	Cd48	CD48 antigen [Source:MGI Symbol;Acc:MGI:88339]
511	ENSMUSG00000038508	4.31149	8.26947e-05	Gdf15	growth differentiation factor 15 [Source:MGI Symbol;Acc:MGI:1346047]
512	ENSMUSG00000042613	0.60635	8.44747e-05	Pbxip1	pre B cell leukemia transcription factor interacting protein 1 [Source:MGI Symbol;Acc:MGI:2441670]
513	ENSMUSG00000029622	0.862349	8.5063e-05	Arpc1b	actin related protein 2/3 complex, subunit 1B [Source:MGI Symbol;Acc:MGI:1343142]
514	ENSMUSG00000021624	2.4299	8.63767e-05	Cd180	CD180 antigen [Source:MGI Symbol;Acc:MGI:1194924]
515	ENSMUSG00000028451	5.30021	8.63767e-05	1700022I11Rik	RIKEN cDNA 1700022I11 gene [Source:MGI Symbol;Acc:MGI:1914567]
516	ENSMUSG00000020534	1.08549	8.75211e-05	Shmt1	serine hydroxymethyltransferase 1 (soluble) [Source:MGI Symbol;Acc:MGI:98299]
517	ENSMUSG00000018008	0.720211	8.79163e-05	Cyth4	cytohesin 4 [Source:MGI Symbol;Acc:MGI:2441702]
518	ENSMUSG00000021281	1.14463	8.81085e-05	Tnfaip2	tumor necrosis factor, alpha-induced protein 2 [Source:MGI Symbol;Acc:MGI:104960]
519	ENSMUSG00000031103	1.46726	9.33994e-05	Elf4	E74-like factor 4 (ets domain transcription factor) [Source:MGI Symbol;Acc:MGI:1928377]
520	ENSMUSG00000026483	0.999392	9.5946e-05	Fam129a	niban apoptosis regulator 1 [Source:MGI Symbol;Acc:MGI:2137237]
521	ENSMUSG00000034708	1.22563	9.71301e-05	Grn	granulin [Source:MGI Symbol;Acc:MGI:95832]
522	ENSMUSG00000110275	1.86431	9.71301e-05	Gm5905	predicted gene 5905 [Source:MGI Symbol;Acc:MGI:3647422]
523	ENSMUSG00000020914	1.53943	9.79727e-05	Top2a	topoisomerase (DNA) II alpha [Source:MGI Symbol;Acc:MGI:98790]
524	ENSMUSG00000026834	-0.80877	9.97174e-05	Acvr1c	activin A receptor, type IC [Source:MGI Symbol;Acc:MGI:2661081]
525	ENSMUSG00000005320	2.98867	9.98185e-05	Fgfr4	fibroblast growth factor receptor 4 [Source:MGI Symbol;Acc:MGI:95525]
526	ENSMUSG00000038677	-0.642621	0.000101063	Scube3	signal peptide, CUB domain, EGF-like 3 [Source:MGI Symbol;Acc:MGI:3045253]
527	ENSMUSG00000097415	1.98695	0.000102922	AU020206	expressed sequence AU020206 [Source:MGI Symbol;Acc:MGI:2142134]
528	ENSMUSG00000107017	2.85694	0.000103349	Gm43196	predicted gene 43196 [Source:MGI Symbol;Acc:MGI:5663333]
529	ENSMUSG00000024330	0.660179	0.000106567	Col11a2	collagen, type XI, alpha 2 [Source:MGI Symbol;Acc:MGI:88447]
530	ENSMUSG00000019979	0.735434	0.000107989	Apaf1	apoptotic peptidase activating factor 1 [Source:MGI Symbol;Acc:MGI:1306796]
531	ENSMUSG00000067714	2.41387	0.000111829	Lpar5	lysophosphatidic acid receptor 5 [Source:MGI Symbol;Acc:MGI:2685918]
532	ENSMUSG00000038147	1.52061	0.000113941	Cd84	CD84 antigen [Source:MGI Symbol;Acc:MGI:1336885]
533	ENSMUSG00000031004	1.29313	0.000114835	Mki67	antigen identified by monoclonal antibody Ki 67 [Source:MGI Symbol;Acc:MGI:106035]
534	ENSMUSG00000078349	1.19739	0.000119239	AW011738	expressed sequence AW011738 [Source:MGI Symbol;Acc:MGI:2140540]
535	ENSMUSG00000024014	1.01733	0.000119684	Pim1	proviral integration site 1 [Source:MGI Symbol;Acc:MGI:97584]
536	ENSMUSG00000043631	0.921471	0.00012217	Ecm2	extracellular matrix protein 2, female organ and adipocyte specific [Source:MGI Symbol;Acc:MGI:3039578]
537	ENSMUSG00000058624	-0.607332	0.000122272	Gda	guanine deaminase [Source:MGI Symbol;Acc:MGI:95678]
538	ENSMUSG00000015950	1.08622	0.000127139	Ncf1	neutrophil cytosolic factor 1 [Source:MGI Symbol;Acc:MGI:97283]
539	ENSMUSG00000069306	3.56235	0.000127331	Hist1h4m	H4 clustered histone 17 [Source:MGI Symbol;Acc:MGI:2448441]
540	ENSMUSG00000000628	0.979404	0.000129741	Hk2	hexokinase 2 [Source:MGI Symbol;Acc:MGI:1315197]
541	ENSMUSG00000023216	3.6901	0.000133495	Epb42	erythrocyte membrane protein band 4.2 [Source:MGI Symbol;Acc:MGI:95402]
542	ENSMUSG00000036854	0.831518	0.00013424	Hspb6	heat shock protein, alpha-crystallin-related, B6 [Source:MGI Symbol;Acc:MGI:2685325]
543	ENSMUSG00000046999	-0.71091	0.000135078	1110032F04Rik	RIKEN cDNA 1110032F04 gene [Source:MGI Symbol;Acc:MGI:1915975]
544	ENSMUSG00000022483	1.28627	0.00013574	Col2a1	collagen, type II, alpha 1 [Source:MGI Symbol;Acc:MGI:88452]
545	ENSMUSG00000036578	-0.736844	0.000135778	Fxyd7	FXYD domain-containing ion transport regulator 7 [Source:MGI Symbol;Acc:MGI:1889006]
546	ENSMUSG00000047798	2.54583	0.000135778	Cd300lf	CD300 molecule like family member F [Source:MGI Symbol;Acc:MGI:2442359]
547	ENSMUSG00000033538	2.50813	0.000145212	Casp4	caspase 4, apoptosis-related cysteine peptidase [Source:MGI Symbol;Acc:MGI:107700]
548	ENSMUSG00000032807	-1.10116	0.000149463	Alox12b	arachidonate 12-lipoxygenase, 12R type [Source:MGI Symbol;Acc:MGI:1274782]
549	ENSMUSG00000042010	0.749375	0.000154046	Acacb	acetyl-Coenzyme A carboxylase beta [Source:MGI Symbol;Acc:MGI:2140940]
550	ENSMUSG00000030737	0.734211	0.000155343	Slco2b1	solute carrier organic anion transporter family, member 2b1 [Source:MGI Symbol;Acc:MGI:1351872]
551	ENSMUSG00000036461	0.733141	0.000161701	Elf1	E74 like ETS transcription factor 1 [Source:MGI Symbol;Acc:MGI:107180]
552	ENSMUSG00000064367	-0.595924	0.000162469	mt-Nd5	mitochondrially encoded NADH dehydrogenase 5 [Source:MGI Symbol;Acc:MGI:102496]
553	ENSMUSG00000015243	1.10951	0.000165095	Abca1	ATP-binding cassette, sub-family A (ABC1), member 1 [Source:MGI Symbol;Acc:MGI:99607]
554	ENSMUSG00000094103	-1.29491	0.000165295	1700047I17Rik2	family with sequence similarity 177 member A2 [Source:MGI Symbol;Acc:MGI:3714351]
555	ENSMUSG00000028841	3.43883	0.000165714	Cnksr1	connector enhancer of kinase suppressor of Ras 1 [Source:MGI Symbol;Acc:MGI:2670958]
556	ENSMUSG00000046805	1.93331	0.000169145	Mpeg1	macrophage expressed gene 1 [Source:MGI Symbol;Acc:MGI:1333743]
557	ENSMUSG00000038774	0.658474	0.000171739	Ascc3	activating signal cointegrator 1 complex subunit 3 [Source:MGI Symbol;Acc:MGI:1925237]
558	ENSMUSG00000031264	1.78734	0.000174833	Btk	Bruton agammaglobulinemia tyrosine kinase [Source:MGI Symbol;Acc:MGI:88216]
559	ENSMUSG00000029484	0.885058	0.000176968	Anxa3	annexin A3 [Source:MGI Symbol;Acc:MGI:1201378]
560	ENSMUSG00000031304	2.38976	0.000177167	Il2rg	interleukin 2 receptor, gamma chain [Source:MGI Symbol;Acc:MGI:96551]
561	ENSMUSG00000006342	-0.654333	0.000184121	Susd2	sushi domain containing 2 [Source:MGI Symbol;Acc:MGI:1918983]
562	ENSMUSG00000108616	-0.59997	0.000194612	Gm35040	predicted gene, 35040 [Source:MGI Symbol;Acc:MGI:5594199]
563	ENSMUSG00000078495	1.44065	0.000195714	Zfp984	zinc finger protein 984 [Source:MGI Symbol;Acc:MGI:3651978]
564	ENSMUSG00000006411	0.915902	0.00019603	Nectin4	nectin cell adhesion molecule 4 [Source:MGI Symbol;Acc:MGI:1918990]
565	ENSMUSG00000031165	1.58824	0.000197397	Was	Wiskott-Aldrich syndrome [Source:MGI Symbol;Acc:MGI:105059]
566	ENSMUSG00000020941	0.678192	0.000202631	Map3k14	mitogen-activated protein kinase kinase kinase 14 [Source:MGI Symbol;Acc:MGI:1858204]
567	ENSMUSG00000044811	1.45136	0.000203933	Cd300c2	CD300C molecule 2 [Source:MGI Symbol;Acc:MGI:2153249]
568	ENSMUSG00000027971	-0.710137	0.000212633	Ndst4	N-deacetylase/N-sulfotransferase (heparin glucosaminyl) 4 [Source:MGI Symbol;Acc:MGI:1932545]
569	ENSMUSG00000022439	0.99368	0.000212879	Parvg	parvin, gamma [Source:MGI Symbol;Acc:MGI:2158329]
570	ENSMUSG00000026822	3.49934	0.000212879	Lcn2	lipocalin 2 [Source:MGI Symbol;Acc:MGI:96757]
571	ENSMUSG00000059336	0.827385	0.000212939	Slc14a1	solute carrier family 14 (urea transporter), member 1 [Source:MGI Symbol;Acc:MGI:1351654]
572	ENSMUSG00000097039	0.80635	0.000214606	Pvt1	Pvt1 oncogene [Source:MGI Symbol;Acc:MGI:97824]
573	ENSMUSG00000022952	1.59696	0.000223176	Runx1	runt related transcription factor 1 [Source:MGI Symbol;Acc:MGI:99852]
574	ENSMUSG00000022218	3.3558	0.000225878	Tgm1	transglutaminase 1, K polypeptide [Source:MGI Symbol;Acc:MGI:98730]
575	ENSMUSG00000053835	0.79663	0.000228	H2-T24	histocompatibility 2, T region locus 24 [Source:MGI Symbol;Acc:MGI:95958]
576	ENSMUSG00000034881	1.491	0.000243642	Tbxa2r	thromboxane A2 receptor [Source:MGI Symbol;Acc:MGI:98496]
577	ENSMUSG00000030111	2.06586	0.000245594	A2m	alpha-2-macroglobulin [Source:MGI Symbol;Acc:MGI:2449119]
578	ENSMUSG00000008384	0.698735	0.000253387	Sertad1	SERTA domain containing 1 [Source:MGI Symbol;Acc:MGI:1913438]
579	ENSMUSG00000000290	1.61062	0.00025686	Itgb2	integrin beta 2 [Source:MGI Symbol;Acc:MGI:96611]
580	ENSMUSG00000032440	0.750891	0.000259388	Tgfbr2	transforming growth factor, beta receptor II [Source:MGI Symbol;Acc:MGI:98729]
581	ENSMUSG00000024164	2.94336	0.000273685	C3	complement component 3 [Source:MGI Symbol;Acc:MGI:88227]
582	ENSMUSG00000117050	2.09716	0.00027464	AC167363.2	RIKEN cDNA 1700023B13 gene [Source:MGI Symbol;Acc:MGI:1920529]
583	ENSMUSG00000023348	0.652737	0.000275207	Trip6	thyroid hormone receptor interactor 6 [Source:MGI Symbol;Acc:MGI:1343458]
584	ENSMUSG00000022342	-0.743828	0.000275952	Kcnv1	potassium channel, subfamily V, member 1 [Source:MGI Symbol;Acc:MGI:1914748]
585	ENSMUSG00000072680	-2.6982	0.000279905	Tmem254c
586	ENSMUSG00000030512	0.587017	0.000285827	Snrpa1	small nuclear ribonucleoprotein polypeptide A' [Source:MGI Symbol;Acc:MGI:1916231]
587	ENSMUSG00000030729	-0.589489	0.000296792	Pgm2l1	phosphoglucomutase 2-like 1 [Source:MGI Symbol;Acc:MGI:1918224]
588	ENSMUSG00000084846	1.46491	0.000297096	A730011C13Rik	RIKEN cDNA A730011C13 gene [Source:MGI Symbol;Acc:MGI:2442973]
589	ENSMUSG00000033508	1.43063	0.000307131	Asprv1	aspartic peptidase, retroviral-like 1 [Source:MGI Symbol;Acc:MGI:1915105]
590	ENSMUSG00000003341	1.8246	0.00030813	Atp8b3	ATPase, class I, type 8B, member 3 [Source:MGI Symbol;Acc:MGI:1914581]
591	ENSMUSG00000040283	3.25052	0.000312254	Btnl9	butyrophilin-like 9 [Source:MGI Symbol;Acc:MGI:2442439]
592	ENSMUSG00000024621	0.714763	0.000315749	Csf1r	colony stimulating factor 1 receptor [Source:MGI Symbol;Acc:MGI:1339758]
593	ENSMUSG00000093910	-0.841259	0.000315749	Zfp853	zinc finger protein 853 [Source:MGI Symbol;Acc:MGI:2685638]
594	ENSMUSG00000097452	-0.872568	0.000316185	Gm2824	predicted gene 2824 [Source:MGI Symbol;Acc:MGI:3780995]
595	ENSMUSG00000037014	-0.626991	0.000318398	Sstr4	somatostatin receptor 4 [Source:MGI Symbol;Acc:MGI:105372]
596	ENSMUSG00000023992	1.59333	0.000319119	Trem2	triggering receptor expressed on myeloid cells 2 [Source:MGI Symbol;Acc:MGI:1913150]
597	ENSMUSG00000069270	1.94372	0.000319969	Hist1h2ac	H2A clustered histone 6 [Source:MGI Symbol;Acc:MGI:2448287]
598	ENSMUSG00000109198	1.79662	0.000321577	D7Bwg0826e	DNA segment, Chr 7, Brigham & Women's Genetics 0826 expressed [Source:MGI Symbol;Acc:MGI:106455]
599	ENSMUSG00000116817	2.23954	0.00032475	AC110534.3	predicted gene 5679 [Source:MGI Symbol;Acc:MGI:3779512]
600	ENSMUSG00000037185	-1.70686	0.000325788	Krt80	keratin 80 [Source:MGI Symbol;Acc:MGI:1921377]
601	ENSMUSG00000045930	0.870606	0.000327212	Clec14a	C-type lectin domain family 14, member a [Source:MGI Symbol;Acc:MGI:1914114]
602	ENSMUSG00000050737	0.782815	0.000329389	Ptges	prostaglandin E synthase [Source:MGI Symbol;Acc:MGI:1927593]
603	ENSMUSG00000028860	1.50556	0.000335091	Sytl1	synaptotagmin-like 1 [Source:MGI Symbol;Acc:MGI:1933365]
604	ENSMUSG00000010142	1.45331	0.0003632	Tnfrsf13b	tumor necrosis factor receptor superfamily, member 13b [Source:MGI Symbol;Acc:MGI:1889411]
605	ENSMUSG00000106383	0.651223	0.000380589	E330034L11Rik	RIKEN cDNA E330034L11 gene [Source:MGI Symbol;Acc:MGI:3026962]
606	ENSMUSG00000097998	5.21306	0.000387897	Gm27019	predicted gene, 27019 [Source:MGI Symbol;Acc:MGI:5504134]
607	ENSMUSG00000095115	0.668573	0.000393216	Itpripl2	inositol 1,4,5-triphosphate receptor interacting protein-like 2 [Source:MGI Symbol;Acc:MGI:2442416]
608	ENSMUSG00000020717	0.588779	0.00039619	Pecam1	platelet/endothelial cell adhesion molecule 1 [Source:MGI Symbol;Acc:MGI:97537]
609	ENSMUSG00000070601	-1.35301	0.000401765	Vmn2r84	vomeronasal 2, receptor 84 [Source:MGI Symbol;Acc:MGI:3643367]
610	ENSMUSG00000071714	1.35017	0.000402024	Csf2rb2	colony stimulating factor 2 receptor, beta 2, low-affinity (granulocyte-macrophage) [Source:MGI Symbol;Acc:MGI:1339760]
611	ENSMUSG00000019832	1.13002	0.000404835	Rab32	RAB32, member RAS oncogene family [Source:MGI Symbol;Acc:MGI:1915094]
612	ENSMUSG00000041147	0.59135	0.000405894	Brca2	breast cancer 2, early onset [Source:MGI Symbol;Acc:MGI:109337]
613	ENSMUSG00000029304	0.683336	0.000409807	Spp1	secreted phosphoprotein 1 [Source:MGI Symbol;Acc:MGI:98389]
614	ENSMUSG00000026227	0.625898	0.000436544	2810459M11Rik	RIKEN cDNA 2810459M11 gene [Source:MGI Symbol;Acc:MGI:1920042]
615	ENSMUSG00000053175	1.55413	0.000438088	Bcl3	B cell leukemia/lymphoma 3 [Source:MGI Symbol;Acc:MGI:88140]
616	ENSMUSG00000026088	0.788284	0.000451631	Mitd1	MIT, microtubule interacting and transport, domain containing 1 [Source:MGI Symbol;Acc:MGI:1916278]
617	ENSMUSG00000001025	0.940295	0.000459354	S100a6	S100 calcium binding protein A6 (calcyclin) [Source:MGI Symbol;Acc:MGI:1339467]
618	ENSMUSG00000037725	1.511	0.000459861	Ckap2	cytoskeleton associated protein 2 [Source:MGI Symbol;Acc:MGI:1931797]
619	ENSMUSG00000022575	1.08842	0.000460576	Gsdmd	gasdermin D [Source:MGI Symbol;Acc:MGI:1916396]
620	ENSMUSG00000016256	1.26993	0.000461447	Ctsz	cathepsin Z [Source:MGI Symbol;Acc:MGI:1891190]
621	ENSMUSG00000065947	-1.26798	0.000461447	mt-Nd4l	mitochondrially encoded NADH dehydrogenase 4L [Source:MGI Symbol;Acc:MGI:102497]
622	ENSMUSG00000039728	2.2417	0.000482646	Slc6a5	solute carrier family 6 (neurotransmitter transporter, glycine), member 5 [Source:MGI Symbol;Acc:MGI:105090]
623	ENSMUSG00000079110	0.94329	0.000487493	Capn3	calpain 3 [Source:MGI Symbol;Acc:MGI:107437]
624	ENSMUSG00000061086	-1.24647	0.000494236	Myl4	myosin, light polypeptide 4 [Source:MGI Symbol;Acc:MGI:97267]
625	ENSMUSG00000026271	1.82602	0.000508843	Gpr35	G protein-coupled receptor 35 [Source:MGI Symbol;Acc:MGI:1929509]
626	ENSMUSG00000030681	0.793778	0.000516076	Mvp	major vault protein [Source:MGI Symbol;Acc:MGI:1925638]
627	ENSMUSG00000007041	0.848498	0.000521765	Clic1	chloride intracellular channel 1 [Source:MGI Symbol;Acc:MGI:2148924]
628	ENSMUSG00000064357	-1.18436	0.000526128	mt-Atp6	mitochondrially encoded ATP synthase 6 [Source:MGI Symbol;Acc:MGI:99927]
629	ENSMUSG00000052234	1.92843	0.000528404	Epx	eosinophil peroxidase [Source:MGI Symbol;Acc:MGI:107569]
630	ENSMUSG00000031838	1.22636	0.000540573	Ifi30	interferon gamma inducible protein 30 [Source:MGI Symbol;Acc:MGI:2137648]
631	ENSMUSG00000030641	2.18387	0.000547018	Ddias	DNA damage-induced apoptosis suppressor [Source:MGI Symbol;Acc:MGI:1921291]
632	ENSMUSG00000097048	0.59995	0.000548857	1600020E01Rik	RIKEN cDNA 1600020E01 gene [Source:MGI Symbol;Acc:MGI:1919262]
633	ENSMUSG00000060678	2.89731	0.000551032	Hist1h4c	H4 clustered histone 3 [Source:MGI Symbol;Acc:MGI:2448421]
634	ENSMUSG00000014444	0.606524	0.000559705	Piezo1	piezo-type mechanosensitive ion channel component 1 [Source:MGI Symbol;Acc:MGI:3603204]
635	ENSMUSG00000015843	-0.599312	0.000566752	Rxrg	retinoid X receptor gamma [Source:MGI Symbol;Acc:MGI:98216]
636	ENSMUSG00000068220	0.679838	0.000573964	Lgals1	lectin, galactose binding, soluble 1 [Source:MGI Symbol;Acc:MGI:96777]
637	ENSMUSG00000044177	0.985794	0.000600388	Wfikkn2	WAP, follistatin/kazal, immunoglobulin, kunitz and netrin domain containing 2 [Source:MGI Symbol;Acc:MGI:2669209]
638	ENSMUSG00000001751	0.793654	0.000617263	Naglu	alpha-N-acetylglucosaminidase (Sanfilippo disease IIIB) [Source:MGI Symbol;Acc:MGI:1351641]
639	ENSMUSG00000028784	1.49955	0.000644393	Spocd1	SPOC domain containing 1 [Source:MGI Symbol;Acc:MGI:3652045]
640	ENSMUSG00000115529	-0.989946	0.000655242	9630013A20Rik	RIKEN cDNA 9630013A20 gene [Source:MGI Symbol;Acc:MGI:2442953]
641	ENSMUSG00000064288	2.39212	0.000668474	Hist1h4k	H4 clustered histone 12 [Source:MGI Symbol;Acc:MGI:2448439]
642	ENSMUSG00000020472	0.63166	0.000674243	Zkscan17	zinc finger with KRAB and SCAN domains 17 [Source:MGI Symbol;Acc:MGI:2679270]
643	ENSMUSG00000055632	1.42126	0.000675564	Hmcn2	hemicentin 2 [Source:MGI Symbol;Acc:MGI:2677838]
644	ENSMUSG00000031639	0.864657	0.000681761	Tlr3	toll-like receptor 3 [Source:MGI Symbol;Acc:MGI:2156367]
645	ENSMUSG00000020388	0.975353	0.000681761	Pdlim4	PDZ and LIM domain 4 [Source:MGI Symbol;Acc:MGI:1353470]
646	ENSMUSG00000004730	0.970898	0.000696479	Adgre1	adhesion G protein-coupled receptor E1 [Source:MGI Symbol;Acc:MGI:106912]
647	ENSMUSG00000030793	1.23096	0.000696479	Pycard	PYD and CARD domain containing [Source:MGI Symbol;Acc:MGI:1931465]
648	ENSMUSG00000052760	1.94822	0.000698246	A630001G21Rik	RIKEN cDNA A630001G21 gene [Source:MGI Symbol;Acc:MGI:2443131]
649	ENSMUSG00000022912	0.80423	0.000711722	Pros1	protein S (alpha) [Source:MGI Symbol;Acc:MGI:1095733]
650	ENSMUSG00000034115	2.05486	0.000734962	Scn11a	sodium channel, voltage-gated, type XI, alpha [Source:MGI Symbol;Acc:MGI:1345149]
651	ENSMUSG00000022364	0.619154	0.000741182	Tbc1d31	TBC1 domain family, member 31 [Source:MGI Symbol;Acc:MGI:2684931]
652	ENSMUSG00000030208	1.14895	0.000742935	Emp1	epithelial membrane protein 1 [Source:MGI Symbol;Acc:MGI:107941]
653	ENSMUSG00000046675	0.718562	0.000774178	Tmem251	transmembrane protein 251 [Source:MGI Symbol;Acc:MGI:2443862]
654	ENSMUSG00000037686	1.06947	0.000775814	Aspg	asparaginase [Source:MGI Symbol;Acc:MGI:2144822]
655	ENSMUSG00000095217	3.01292	0.000784998	Hist1h2bn	H2B clustered histone 15 [Source:MGI Symbol;Acc:MGI:2448407]
656	ENSMUSG00000005087	1.12609	0.000787416	Cd44	CD44 antigen [Source:MGI Symbol;Acc:MGI:88338]
657	ENSMUSG00000036246	0.68029	0.000814093	Gmip	Gem-interacting protein [Source:MGI Symbol;Acc:MGI:1926066]
658	ENSMUSG00000079033	2.44458	0.000819812	Mef2b	myocyte enhancer factor 2B [Source:MGI Symbol;Acc:MGI:104526]
659	ENSMUSG00000079480	0.739473	0.000839135	Pin4	peptidyl-prolyl cis/trans isomerase, NIMA-interacting, 4 (parvulin) [Source:MGI Symbol;Acc:MGI:1916963]
660	ENSMUSG00000031897	0.605281	0.000858186	Psmb10	proteasome (prosome, macropain) subunit, beta type 10 [Source:MGI Symbol;Acc:MGI:1096380]
661	ENSMUSG00000097785	0.665413	0.000862354	B230217O12Rik	RIKEN cDNA B230217O12 gene [Source:MGI Symbol;Acc:MGI:2444948]
662	ENSMUSG00000050335	2.0496	0.000862698	Lgals3	lectin, galactose binding, soluble 3 [Source:MGI Symbol;Acc:MGI:96778]
663	ENSMUSG00000038578	-0.605394	0.000875861	Susd1	sushi domain containing 1 [Source:MGI Symbol;Acc:MGI:3651543]
664	ENSMUSG00000107215	2.05731	0.000890525	Gm43197	predicted gene 43197 [Source:MGI Symbol;Acc:MGI:5663334]
665	ENSMUSG00000112148	2.16302	0.000904296	Lilrb4a	leukocyte immunoglobulin-like receptor, subfamily B, member 4A [Source:MGI Symbol;Acc:MGI:102701]
666	ENSMUSG00000002233	0.597041	0.000908489	Rhoc	ras homolog family member C [Source:MGI Symbol;Acc:MGI:106028]
667	ENSMUSG00000034330	0.863957	0.000908641	Plcg2	phospholipase C, gamma 2 [Source:MGI Symbol;Acc:MGI:97616]
668	ENSMUSG00000078137	-0.637291	0.000921824	Ankrd63	ankyrin repeat domain 63 [Source:MGI Symbol;Acc:MGI:2686183]
669	ENSMUSG00000076617	-0.643956	0.000924089	Ighm	immunoglobulin heavy constant mu [Source:MGI Symbol;Acc:MGI:96448]
670	ENSMUSG00000039899	1.05426	0.000927087	Fgl2	fibrinogen-like protein 2 [Source:MGI Symbol;Acc:MGI:103266]
671	ENSMUSG00000064369	-0.86422	0.000960236	mt-Te	mitochondrially encoded tRNA glutamic acid [Source:MGI Symbol;Acc:MGI:102488]
672	ENSMUSG00000027230	0.76731	0.000960236	Creb3l1	cAMP responsive element binding protein 3-like 1 [Source:MGI Symbol;Acc:MGI:1347062]
673	ENSMUSG00000020251	-0.774372	0.000977181	Glt8d2	glycosyltransferase 8 domain containing 2 [Source:MGI Symbol;Acc:MGI:1922032]
674	ENSMUSG00000001166	1.72645	0.000979715	Oas1c	2'-5' oligoadenylate synthetase 1C [Source:MGI Symbol;Acc:MGI:2149633]
675	ENSMUSG00000052749	2.33639	0.000979715	Trim30b	tripartite motif-containing 30B [Source:MGI Symbol;Acc:MGI:4821256]
676	ENSMUSG00000037161	3.06672	0.00103171	Mgarp	mitochondria localized glutamic acid rich protein [Source:MGI Symbol;Acc:MGI:1914999]
677	ENSMUSG00000028850	0.727509	0.00103238	Gpatch3	G patch domain containing 3 [Source:MGI Symbol;Acc:MGI:2442492]
678	ENSMUSG00000104682	2.06532	0.00103521	Gm42636	predicted gene 42636 [Source:MGI Symbol;Acc:MGI:5662773]
679	ENSMUSG00000029204	1.89209	0.00103771	Rhoh	ras homolog family member H [Source:MGI Symbol;Acc:MGI:1921984]
680	ENSMUSG00000017491	-0.626774	0.00104654	Rarb	retinoic acid receptor, beta [Source:MGI Symbol;Acc:MGI:97857]
681	ENSMUSG00000023903	2.39761	0.00105819	Mmp25	matrix metallopeptidase 25 [Source:MGI Symbol;Acc:MGI:2443938]
682	ENSMUSG00000024186	-0.626791	0.00109677	Rgs11	regulator of G-protein signaling 11 [Source:MGI Symbol;Acc:MGI:1354739]
683	ENSMUSG00000096351	1.21289	0.00110957	Samd11	sterile alpha motif domain containing 11 [Source:MGI Symbol;Acc:MGI:2446220]
684	ENSMUSG00000037411	1.28625	0.00111157	Serpine1	serine (or cysteine) peptidase inhibitor, clade E, member 1 [Source:MGI Symbol;Acc:MGI:97608]
685	ENSMUSG00000074342	1.58144	0.00111159	I830077J02Rik	RIKEN cDNA I830077J02 gene [Source:MGI Symbol;Acc:MGI:3588284]
686	ENSMUSG00000044244	2.12538	0.00112669	Il20rb	interleukin 20 receptor beta [Source:MGI Symbol;Acc:MGI:2143266]
687	ENSMUSG00000021743	-0.586696	0.00114053	Fezf2	Fez family zinc finger 2 [Source:MGI Symbol;Acc:MGI:1859823]
688	ENSMUSG00000032218	1.41341	0.00114053	Ccnb2	cyclin B2 [Source:MGI Symbol;Acc:MGI:88311]
689	ENSMUSG00000110206	1.01358	0.00114201	Flt3l	FMS-like tyrosine kinase 3 ligand [Source:MGI Symbol;Acc:MGI:95560]
690	ENSMUSG00000039376	2.76503	0.00114905	Synpo2l	synaptopodin 2-like [Source:MGI Symbol;Acc:MGI:1916010]
691	ENSMUSG00000087306	2.674	0.00115938	A230004M16Rik	RIKEN cDNA A230004M16 gene [Source:MGI Symbol;Acc:MGI:2445050]
692	ENSMUSG00000071478	2.89556	0.00116375	Hist1h2ad	H2A clustered histone 7 [Source:MGI Symbol;Acc:MGI:2448289]
693	ENSMUSG00000051747	1.11481	0.00117166	Ttn	titin [Source:MGI Symbol;Acc:MGI:98864]
694	ENSMUSG00000002769	1.58374	0.00119204	Gnmt	glycine N-methyltransferase [Source:MGI Symbol;Acc:MGI:1202304]
695	ENSMUSG00000106350	3.42163	0.0012213	Gm4869	kinesin family member 19B [Source:MGI Symbol;Acc:MGI:3646257]
696	ENSMUSG00000032018	-0.605108	0.0012412	Sc5d	sterol-C5-desaturase [Source:MGI Symbol;Acc:MGI:1353611]
697	ENSMUSG00000024013	0.932375	0.00127614	Fgd2	FYVE, RhoGEF and PH domain containing 2 [Source:MGI Symbol;Acc:MGI:1347084]
698	ENSMUSG00000116604	2.06769	0.00130133	AC087898.2	predicted gene, 49745 [Source:MGI Symbol;Acc:MGI:6215237]
699	ENSMUSG00000025480	2.82625	0.00130284	Syce1	synaptonemal complex central element protein 1 [Source:MGI Symbol;Acc:MGI:1921325]
700	ENSMUSG00000074622	0.634058	0.00130359	Mafb	v-maf musculoaponeurotic fibrosarcoma oncogene family, protein B (avian) [Source:MGI Symbol;Acc:MGI:104555]
701	ENSMUSG00000106025	1.99531	0.00132164	Gm42940	predicted gene 42940 [Source:MGI Symbol;Acc:MGI:5663077]
702	ENSMUSG00000103865	1.60293	0.00132644	Gm37416	predicted gene, 37416 [Source:MGI Symbol;Acc:MGI:5610644]
703	ENSMUSG00000026017	-0.606551	0.00133568	Carf	calcium response factor [Source:MGI Symbol;Acc:MGI:2182269]
704	ENSMUSG00000023186	0.73204	0.00133959	Vwa5a	von Willebrand factor A domain containing 5A [Source:MGI Symbol;Acc:MGI:1915026]
705	ENSMUSG00000031805	0.607354	0.00134086	Jak3	Janus kinase 3 [Source:MGI Symbol;Acc:MGI:99928]
706	ENSMUSG00000033777	1.27461	0.00134086	Tlr13	toll-like receptor 13 [Source:MGI Symbol;Acc:MGI:3045213]
707	ENSMUSG00000031112	-0.659596	0.00134293	Stk26	serine/threonine kinase 26 [Source:MGI Symbol;Acc:MGI:1917665]
708	ENSMUSG00000031170	0.907219	0.00137034	Slc38a5	solute carrier family 38, member 5 [Source:MGI Symbol;Acc:MGI:2148066]
709	ENSMUSG00000000732	1.00867	0.00137464	Icosl	icos ligand [Source:MGI Symbol;Acc:MGI:1354701]
710	ENSMUSG00000053783	-1.4682	0.00137464	1700016K19Rik	RIKEN cDNA 1700016K19 gene [Source:MGI Symbol;Acc:MGI:1921480]
711	ENSMUSG00000006360	1.02387	0.00138675	Crip1	cysteine-rich protein 1 (intestinal) [Source:MGI Symbol;Acc:MGI:88501]
712	ENSMUSG00000117255	1.9956	0.0013998	AC140278.1	predicted gene, 49864 [Source:MGI Symbol;Acc:MGI:6270538]
713	ENSMUSG00000026728	1.31207	0.00142881	Vim	vimentin [Source:MGI Symbol;Acc:MGI:98932]
714	ENSMUSG00000076612	-1.18529	0.00145241	Ighg2c	immunoglobulin heavy constant gamma 2C [Source:MGI Symbol;Acc:MGI:2686979]
715	ENSMUSG00000044534	-1.59057	0.00146501	Ackr2	atypical chemokine receptor 2 [Source:MGI Symbol;Acc:MGI:1891697]
716	ENSMUSG00000064361	-1.2519	0.00147782	mt-Tr	mitochondrially encoded tRNA arginine [Source:MGI Symbol;Acc:MGI:102476]
717	ENSMUSG00000055541	0.908259	0.001482	Lair1	leukocyte-associated Ig-like receptor 1 [Source:MGI Symbol;Acc:MGI:105492]
718	ENSMUSG00000042644	0.622712	0.00149619	Itpr3	inositol 1,4,5-triphosphate receptor 3 [Source:MGI Symbol;Acc:MGI:96624]
719	ENSMUSG00000112105	1.85025	0.00149855	Rps7-ps2	ribosomal protein S7, pseudogene 2 [Source:MGI Symbol;Acc:MGI:3646014]
720	ENSMUSG00000034595	0.641991	0.00149895	Ppp1r18	protein phosphatase 1, regulatory subunit 18 [Source:MGI Symbol;Acc:MGI:1923698]
721	ENSMUSG00000056888	2.11122	0.00151722	Glipr1	GLI pathogenesis-related 1 (glioma) [Source:MGI Symbol;Acc:MGI:1920940]
722	ENSMUSG00000015451	0.925492	0.00151841	C4a	complement component 4A (Rodgers blood group) [Source:MGI Symbol;Acc:MGI:98320]
723	ENSMUSG00000072707	3.20128	0.00151841	Olfr31	olfactory receptor family 2 subfamily T member 1 [Source:MGI Symbol;Acc:MGI:109304]
724	ENSMUSG00000031387	1.04961	0.00152005	Renbp	renin binding protein [Source:MGI Symbol;Acc:MGI:105940]
725	ENSMUSG00000086837	1.65175	0.0015882	Gm16618	predicted gene, 16618 [Source:MGI Symbol;Acc:MGI:4439542]
726	ENSMUSG00000024679	1.47841	0.00160344	Ms4a6d	membrane-spanning 4-domains, subfamily A, member 6D [Source:MGI Symbol;Acc:MGI:1916024]
727	ENSMUSG00000094626	-0.586779	0.00163305	Tmem121b	transmembrane protein 121B [Source:MGI Symbol;Acc:MGI:2136977]
728	ENSMUSG00000027961	1.49692	0.00164749	Lrrc39	leucine rich repeat containing 39 [Source:MGI Symbol;Acc:MGI:1924557]
729	ENSMUSG00000090693	1.25237	0.00165181	Trim43a	tripartite motif-containing 43A [Source:MGI Symbol;Acc:MGI:3645218]
730	ENSMUSG00000021822	0.971108	0.00167058	Plau	plasminogen activator, urokinase [Source:MGI Symbol;Acc:MGI:97611]
731	ENSMUSG00000004609	0.818945	0.00167338	Cd33	CD33 antigen [Source:MGI Symbol;Acc:MGI:99440]
732	ENSMUSG00000020399	1.36856	0.00167841	Havcr2	hepatitis A virus cellular receptor 2 [Source:MGI Symbol;Acc:MGI:2159682]
733	ENSMUSG00000050014	2.28008	0.00169402	Apol10b	apolipoprotein L 10B [Source:MGI Symbol;Acc:MGI:3043522]
734	ENSMUSG00000021732	-0.690148	0.00170081	Fgf10	fibroblast growth factor 10 [Source:MGI Symbol;Acc:MGI:1099809]
735	ENSMUSG00000016206	0.825262	0.00172094	H2-M3	histocompatibility 2, M region locus 3 [Source:MGI Symbol;Acc:MGI:95915]
736	ENSMUSG00000025432	1.59714	0.00175736	Avil	advillin [Source:MGI Symbol;Acc:MGI:1333798]
737	ENSMUSG00000030577	2.48813	0.00179156	Cd22	CD22 antigen [Source:MGI Symbol;Acc:MGI:88322]
738	ENSMUSG00000048406	1.00034	0.00180676	B330016D10Rik	RIKEN cDNA B330016D10 gene [Source:MGI Symbol;Acc:MGI:2444063]
739	ENSMUSG00000026785	1.24213	0.00186289	Pkn3	protein kinase N3 [Source:MGI Symbol;Acc:MGI:2388285]
740	ENSMUSG00000024349	1.01581	0.00193083	Tmem173	stimulator of interferon response cGAMP interactor 1 [Source:MGI Symbol;Acc:MGI:1919762]
741	ENSMUSG00000059406	1.42878	0.00193083	Tmprss9	transmembrane protease, serine 9 [Source:MGI Symbol;Acc:MGI:3612246]
742	ENSMUSG00000023078	6.18012	0.00194933	Cxcl13	chemokine (C-X-C motif) ligand 13 [Source:MGI Symbol;Acc:MGI:1888499]
743	ENSMUSG00000030703	2.48961	0.00196049	Gdpd3	glycerophosphodiester phosphodiesterase domain containing 3 [Source:MGI Symbol;Acc:MGI:1915866]
744	ENSMUSG00000021665	1.01893	0.00198416	Hexb	hexosaminidase B [Source:MGI Symbol;Acc:MGI:96074]
745	ENSMUSG00000036560	0.612423	0.00205903	Lgi4	leucine-rich repeat LGI family, member 4 [Source:MGI Symbol;Acc:MGI:2180197]
746	ENSMUSG00000021453	0.666872	0.00211261	Gadd45g	growth arrest and DNA-damage-inducible 45 gamma [Source:MGI Symbol;Acc:MGI:1346325]
747	ENSMUSG00000056498	1.95142	0.00218568	Tmem154	transmembrane protein 154 [Source:MGI Symbol;Acc:MGI:2444725]
748	ENSMUSG00000024131	2.82834	0.00219084	Slc3a1	solute carrier family 3, member 1 [Source:MGI Symbol;Acc:MGI:1195264]
749	ENSMUSG00000052479	-0.7971	0.00221247	A330008L17Rik	RIKEN cDNA A330008L17 gene [Source:MGI Symbol;Acc:MGI:2443215]
750	ENSMUSG00000074971	0.83617	0.0022316	Fibin	fin bud initiation factor homolog (zebrafish) [Source:MGI Symbol;Acc:MGI:1914856]
751	ENSMUSG00000059498	0.893556	0.00230792	Fcgr3	Fc receptor, IgG, low affinity III [Source:MGI Symbol;Acc:MGI:95500]
752	ENSMUSG00000018143	0.672559	0.00232047	Mafk	v-maf musculoaponeurotic fibrosarcoma oncogene family, protein K (avian) [Source:MGI Symbol;Acc:MGI:99951]
753	ENSMUSG00000028583	0.739949	0.00232047	Pdpn	podoplanin [Source:MGI Symbol;Acc:MGI:103098]
754	ENSMUSG00000006517	-0.691936	0.00234967	Mvd	mevalonate (diphospho) decarboxylase [Source:MGI Symbol;Acc:MGI:2179327]
755	ENSMUSG00000037542	2.45587	0.00235012	Aldh8a1	aldehyde dehydrogenase 8 family, member A1 [Source:MGI Symbol;Acc:MGI:2653900]
756	ENSMUSG00000032231	0.618305	0.00235731	Anxa2	annexin A2 [Source:MGI Symbol;Acc:MGI:88246]
757	ENSMUSG00000034209	-0.670744	0.00235823	Rasl10a	RAS-like, family 10, member A [Source:MGI Symbol;Acc:MGI:1922918]
758	ENSMUSG00000060791	1.34992	0.00236265	Gmfg	glia maturation factor, gamma [Source:MGI Symbol;Acc:MGI:1927135]
759	ENSMUSG00000032577	0.861125	0.00241947	Mapkapk3	mitogen-activated protein kinase-activated protein kinase 3 [Source:MGI Symbol;Acc:MGI:2143163]
760	ENSMUSG00000029468	0.836333	0.00242021	P2rx7	purinergic receptor P2X, ligand-gated ion channel, 7 [Source:MGI Symbol;Acc:MGI:1339957]
761	ENSMUSG00000006724	1.54223	0.00243099	Cyp27b1	cytochrome P450, family 27, subfamily b, polypeptide 1 [Source:MGI Symbol;Acc:MGI:1098274]
762	ENSMUSG00000018819	0.796976	0.00243884	Lsp1	lymphocyte specific 1 [Source:MGI Symbol;Acc:MGI:96832]
763	ENSMUSG00000039853	1.80353	0.00245088	Trim14	tripartite motif-containing 14 [Source:MGI Symbol;Acc:MGI:1921985]
764	ENSMUSG00000064344	-2.29766	0.00253184	mt-Tm	mitochondrially encoded tRNA methionine [Source:MGI Symbol;Acc:MGI:102480]
765	ENSMUSG00000002603	0.827384	0.00253184	Tgfb1	transforming growth factor, beta 1 [Source:MGI Symbol;Acc:MGI:98725]
766	ENSMUSG00000020812	0.902228	0.00254558	1810032O08Rik	small nucleolar RNA host gene 16 [Source:MGI Symbol;Acc:MGI:1913543]
767	ENSMUSG00000030339	0.735643	0.00257541	Ltbr	lymphotoxin B receptor [Source:MGI Symbol;Acc:MGI:104875]
768	ENSMUSG00000057948	1.33379	0.00257541	Unc13d	unc-13 homolog D [Source:MGI Symbol;Acc:MGI:1917700]
769	ENSMUSG00000045322	1.31298	0.00258331	Tlr9	toll-like receptor 9 [Source:MGI Symbol;Acc:MGI:1932389]
770	ENSMUSG00000058715	1.47662	0.00260354	Fcer1g	Fc receptor, IgE, high affinity I, gamma polypeptide [Source:MGI Symbol;Acc:MGI:95496]
771	ENSMUSG00000012519	2.81066	0.00260597	Mlkl	mixed lineage kinase domain-like [Source:MGI Symbol;Acc:MGI:1921818]
772	ENSMUSG00000023267	1.20242	0.00261147	Gabrr2	gamma-aminobutyric acid (GABA) C receptor, subunit rho 2 [Source:MGI Symbol;Acc:MGI:95626]
773	ENSMUSG00000027690	2.91807	0.00269639	Slc2a2	solute carrier family 2 (facilitated glucose transporter), member 2 [Source:MGI Symbol;Acc:MGI:1095438]
774	ENSMUSG00000021135	2.28271	0.0026974	Slc10a1	solute carrier family 10 (sodium/bile acid cotransporter family), member 1 [Source:MGI Symbol;Acc:MGI:97379]
775	ENSMUSG00000040312	0.713412	0.00272901	Cchcr1	coiled-coil alpha-helical rod protein 1 [Source:MGI Symbol;Acc:MGI:2385321]
776	ENSMUSG00000090210	0.700132	0.00274062	Itga10	integrin, alpha 10 [Source:MGI Symbol;Acc:MGI:2153482]
777	ENSMUSG00000078651	0.74544	0.00275676	Aoc2	amine oxidase, copper containing 2 (retina-specific) [Source:MGI Symbol;Acc:MGI:2668431]
778	ENSMUSG00000035004	1.30397	0.0028368	Igsf6	immunoglobulin superfamily, member 6 [Source:MGI Symbol;Acc:MGI:1891393]
779	ENSMUSG00000071713	2.41036	0.00294485	Csf2rb	colony stimulating factor 2 receptor, beta, low-affinity (granulocyte-macrophage) [Source:MGI Symbol;Acc:MGI:1339759]
780	ENSMUSG00000026831	1.0636	0.00296091	1700007K13Rik	piercer of microtubule wall 1 [Source:MGI Symbol;Acc:MGI:1916577]
781	ENSMUSG00000027293	0.612448	0.00299627	Ehd4	EH-domain containing 4 [Source:MGI Symbol;Acc:MGI:1919619]
782	ENSMUSG00000027398	2.27316	0.00303068	Il1b	interleukin 1 beta [Source:MGI Symbol;Acc:MGI:96543]
783	ENSMUSG00000046410	0.887207	0.00303182	Kcnk6	potassium inwardly-rectifying channel, subfamily K, member 6 [Source:MGI Symbol;Acc:MGI:1891291]
784	ENSMUSG00000002870	0.961822	0.00306483	Mcm2	minichromosome maintenance complex component 2 [Source:MGI Symbol;Acc:MGI:105380]
785	ENSMUSG00000028480	1.00188	0.00308208	Glipr2	GLI pathogenesis-related 2 [Source:MGI Symbol;Acc:MGI:1917770]
786	ENSMUSG00000008090	0.629464	0.00309393	Fgfrl1	fibroblast growth factor receptor-like 1 [Source:MGI Symbol;Acc:MGI:2150920]
787	ENSMUSG00000027684	1.01196	0.00310708	Mecom	MDS1 and EVI1 complex locus [Source:MGI Symbol;Acc:MGI:95457]
788	ENSMUSG00000006313	1.72061	0.00311199	Upk1a	uroplakin 1A [Source:MGI Symbol;Acc:MGI:98911]
789	ENSMUSG00000047250	0.6054	0.00311978	Ptgs1	prostaglandin-endoperoxide synthase 1 [Source:MGI Symbol;Acc:MGI:97797]
790	ENSMUSG00000053318	2.23992	0.00311978	Slamf8	SLAM family member 8 [Source:MGI Symbol;Acc:MGI:1921998]
791	ENSMUSG00000010592	-0.883995	0.00314412	Dazl	deleted in azoospermia-like [Source:MGI Symbol;Acc:MGI:1342328]
792	ENSMUSG00000108181	-0.85814	0.00315237	C030015A19Rik	RIKEN cDNA C030015A19 gene [Source:MGI Symbol;Acc:MGI:1924668]
793	ENSMUSG00000038418	0.814921	0.0032926	Egr1	early growth response 1 [Source:MGI Symbol;Acc:MGI:95295]
794	ENSMUSG00000093865	2.7145	0.00337248	Lrit3	leucine-rich repeat, immunoglobulin-like and transmembrane domains 3 [Source:MGI Symbol;Acc:MGI:2685267]
795	ENSMUSG00000032508	0.831599	0.00342835	Myd88	myeloid differentiation primary response gene 88 [Source:MGI Symbol;Acc:MGI:108005]
796	ENSMUSG00000058743	1.07386	0.00342988	Kcnj14	potassium inwardly-rectifying channel, subfamily J, member 14 [Source:MGI Symbol;Acc:MGI:2384820]
797	ENSMUSG00000025912	1.0839	0.00343431	Mybl1	myeloblastosis oncogene-like 1 [Source:MGI Symbol;Acc:MGI:99925]
798	ENSMUSG00000044258	0.932354	0.00344753	Ctla2a	cytotoxic T lymphocyte-associated protein 2 alpha [Source:MGI Symbol;Acc:MGI:88554]
799	ENSMUSG00000018654	1.00124	0.00351474	Ikzf1	IKAROS family zinc finger 1 [Source:MGI Symbol;Acc:MGI:1342540]
800	ENSMUSG00000021583	0.805919	0.00351806	Erap1	endoplasmic reticulum aminopeptidase 1 [Source:MGI Symbol;Acc:MGI:1933403]
801	ENSMUSG00000036181	1.08829	0.00353837	Hist1h1c	H1.2 linker histone, cluster member [Source:MGI Symbol;Acc:MGI:1931526]
802	ENSMUSG00000111692	2.19093	0.00356288	Gm49373	predicted gene, 49373 [Source:MGI Symbol;Acc:MGI:6121591]
803	ENSMUSG00000062393	-0.651681	0.00357439	Dgkk	diacylglycerol kinase kappa [Source:MGI Symbol;Acc:MGI:3580254]
804	ENSMUSG00000027399	1.74251	0.00358362	Il1a	interleukin 1 alpha [Source:MGI Symbol;Acc:MGI:96542]
805	ENSMUSG00000103382	1.36465	0.00358626	Gm37755	predicted gene, 37755 [Source:MGI Symbol;Acc:MGI:5610983]
806	ENSMUSG00000085829	0.823616	0.00364926	Gm4285	predicted gene 4285 [Source:MGI Symbol;Acc:MGI:3782463]
807	ENSMUSG00000079057	0.623471	0.00365028	Cyp4v3	cytochrome P450, family 4, subfamily v, polypeptide 3 [Source:MGI Symbol;Acc:MGI:2142763]
808	ENSMUSG00000037727	0.743396	0.00366361	Avp	arginine vasopressin [Source:MGI Symbol;Acc:MGI:88121]
809	ENSMUSG00000044595	1.1333	0.00368489	Dnd1	DND microRNA-mediated repression inhibitor 1 [Source:MGI Symbol;Acc:MGI:2447763]
810	ENSMUSG00000004085	0.632698	0.00371703	Map3k20	mitogen-activated protein kinase kinase kinase 20 [Source:MGI Symbol;Acc:MGI:2443258]
811	ENSMUSG00000048779	1.05629	0.00376845	P2ry6	pyrimidinergic receptor P2Y, G-protein coupled, 6 [Source:MGI Symbol;Acc:MGI:2673874]
812	ENSMUSG00000027074	1.60703	0.00377562	Slc43a3	solute carrier family 43, member 3 [Source:MGI Symbol;Acc:MGI:1931054]
813	ENSMUSG00000029249	0.73825	0.00381594	Rest	RE1-silencing transcription factor [Source:MGI Symbol;Acc:MGI:104897]
814	ENSMUSG00000092203	0.684479	0.00392683	1110038B12Rik	RIKEN cDNA 1110038B12 gene [Source:MGI Symbol;Acc:MGI:1916013]
815	ENSMUSG00000112110	1.21693	0.00392736	AC158605.1	predicted gene 15608 [Source:MGI Symbol;Acc:MGI:3801804]
816	ENSMUSG00000042190	0.934363	0.00394961	Cmklr1	chemokine-like receptor 1 [Source:MGI Symbol;Acc:MGI:109603]
817	ENSMUSG00000020806	0.918664	0.00401824	Rhbdf2	rhomboid 5 homolog 2 [Source:MGI Symbol;Acc:MGI:2442473]
818	ENSMUSG00000030775	1.82299	0.00405574	Trat1	T cell receptor associated transmembrane adaptor 1 [Source:MGI Symbol;Acc:MGI:1924897]
819	ENSMUSG00000031995	1.72718	0.00405643	St14	suppression of tumorigenicity 14 (colon carcinoma) [Source:MGI Symbol;Acc:MGI:1338881]
820	ENSMUSG00000074340	0.866242	0.00406014	Ovgp1	oviductal glycoprotein 1 [Source:MGI Symbol;Acc:MGI:106661]
821	ENSMUSG00000073374	0.818904	0.00415423	C030034I22Rik	RIKEN cDNA C030034I22 gene [Source:MGI Symbol;Acc:MGI:1924783]
822	ENSMUSG00000042759	1.61864	0.00416317	Apobr	apolipoprotein B receptor [Source:MGI Symbol;Acc:MGI:2176230]
823	ENSMUSG00000026380	0.712558	0.00418001	Tfcp2l1	transcription factor CP2-like 1 [Source:MGI Symbol;Acc:MGI:2444691]
824	ENSMUSG00000017861	1.31096	0.0042804	Mybl2	myeloblastosis oncogene-like 2 [Source:MGI Symbol;Acc:MGI:101785]
825	ENSMUSG00000027824	1.37116	0.00428282	Vmn2r1	vomeronasal 2, receptor 1 [Source:MGI Symbol;Acc:MGI:3645892]
826	ENSMUSG00000079419	1.82212	0.00428282	Ms4a6c	membrane-spanning 4-domains, subfamily A, member 6C [Source:MGI Symbol;Acc:MGI:2385644]
827	ENSMUSG00000022548	0.816126	0.00428568	Apod	apolipoprotein D [Source:MGI Symbol;Acc:MGI:88056]
828	ENSMUSG00000037318	1.8847	0.00429632	Traf3ip3	TRAF3 interacting protein 3 [Source:MGI Symbol;Acc:MGI:2441706]
829	ENSMUSG00000079227	0.771678	0.00431763	Ccr5	chemokine (C-C motif) receptor 5 [Source:MGI Symbol;Acc:MGI:107182]
830	ENSMUSG00000033688	1.7788	0.00439764	1300017J02Rik	inhibitor of carbonic anhydrase [Source:MGI Symbol;Acc:MGI:1919025]
831	ENSMUSG00000048865	0.850914	0.00444386	Arhgap30	Rho GTPase activating protein 30 [Source:MGI Symbol;Acc:MGI:2684948]
832	ENSMUSG00000040345	1.25302	0.00449392	Arhgap9	Rho GTPase activating protein 9 [Source:MGI Symbol;Acc:MGI:2143764]
833	ENSMUSG00000026288	0.687795	0.00453098	Inpp5d	inositol polyphosphate-5-phosphatase D [Source:MGI Symbol;Acc:MGI:107357]
834	ENSMUSG00000029925	1.18465	0.00459597	Tbxas1	thromboxane A synthase 1, platelet [Source:MGI Symbol;Acc:MGI:98497]
835	ENSMUSG00000029915	1.34004	0.00459597	Clec5a	C-type lectin domain family 5, member a [Source:MGI Symbol;Acc:MGI:1345151]
836	ENSMUSG00000109015	1.25293	0.00463286	Gm31024	predicted gene, 31024 [Source:MGI Symbol;Acc:MGI:5590183]
837	ENSMUSG00000025380	2.09768	0.0046363	Fscn2	fascin actin-bundling protein 2 [Source:MGI Symbol;Acc:MGI:2443337]
838	ENSMUSG00000028979	1.55753	0.00477036	Masp2	mannan-binding lectin serine peptidase 2 [Source:MGI Symbol;Acc:MGI:1330832]
839	ENSMUSG00000050558	-0.732037	0.00480679	Prokr2	prokineticin receptor 2 [Source:MGI Symbol;Acc:MGI:2181363]
840	ENSMUSG00000042510	0.803394	0.00480842	AA986860	expressed sequence AA986860 [Source:MGI Symbol;Acc:MGI:2138143]
841	ENSMUSG00000050930	0.718179	0.00482953	Map10	microtubule-associated protein 10 [Source:MGI Symbol;Acc:MGI:1921643]
842	ENSMUSG00000105552	1.22957	0.00497429	Gm19710	predicted gene, 19710 [Source:MGI Symbol;Acc:MGI:5011895]
843	ENSMUSG00000001249	1.04698	0.00498491	Hpn	hepsin [Source:MGI Symbol;Acc:MGI:1196620]
844	ENSMUSG00000000409	1.00266	0.0050403	Lck	lymphocyte protein tyrosine kinase [Source:MGI Symbol;Acc:MGI:96756]
845	ENSMUSG00000024066	0.761852	0.00504974	Xdh	xanthine dehydrogenase [Source:MGI Symbol;Acc:MGI:98973]
846	ENSMUSG00000064065	-0.909638	0.00505684	Ipcef1	interaction protein for cytohesin exchange factors 1 [Source:MGI Symbol;Acc:MGI:2444159]
847	ENSMUSG00000054520	0.817929	0.00512661	Sh3bp2	SH3-domain binding protein 2 [Source:MGI Symbol;Acc:MGI:1346349]
848	ENSMUSG00000031875	0.631725	0.00518474	Cmtm3	CKLF-like MARVEL transmembrane domain containing 3 [Source:MGI Symbol;Acc:MGI:2447162]
849	ENSMUSG00000055044	-0.653925	0.00538861	Pdlim1	PDZ and LIM domain 1 (elfin) [Source:MGI Symbol;Acc:MGI:1860611]
850	ENSMUSG00000022817	0.584641	0.00555209	Itgb5	integrin beta 5 [Source:MGI Symbol;Acc:MGI:96614]
851	ENSMUSG00000043993	0.835729	0.00561426	2900052L18Rik	RIKEN cDNA 2900052L18 gene [Source:MGI Symbol;Acc:MGI:1924085]
852	ENSMUSG00000030220	0.63706	0.00562298	Arhgdib	Rho, GDP dissociation inhibitor (GDI) beta [Source:MGI Symbol;Acc:MGI:101940]
853	ENSMUSG00000023274	-1.04099	0.00562541	Cd4	CD4 antigen [Source:MGI Symbol;Acc:MGI:88335]
854	ENSMUSG00000041193	0.907898	0.00566816	Pla2g5	phospholipase A2, group V [Source:MGI Symbol;Acc:MGI:101899]
855	ENSMUSG00000028581	1.13172	0.00567261	Laptm5	lysosomal-associated protein transmembrane 5 [Source:MGI Symbol;Acc:MGI:108046]
856	ENSMUSG00000032257	-1.67349	0.00573939	Ankk1	ankyrin repeat and kinase domain containing 1 [Source:MGI Symbol;Acc:MGI:3045301]
857	ENSMUSG00000040747	0.91237	0.00575928	Cd53	CD53 antigen [Source:MGI Symbol;Acc:MGI:88341]
858	ENSMUSG00000027848	1.22767	0.00586418	Olfml3	olfactomedin-like 3 [Source:MGI Symbol;Acc:MGI:1914877]
859	ENSMUSG00000051504	0.686176	0.00592994	Siglech	sialic acid binding Ig-like lectin H [Source:MGI Symbol;Acc:MGI:2443256]
860	ENSMUSG00000085331	2.22178	0.00598791	Gm11274	predicted gene 11274 [Source:MGI Symbol;Acc:MGI:3649225]
861	ENSMUSG00000035873	0.831043	0.00600832	Pawr	PRKC, apoptosis, WT1, regulator [Source:MGI Symbol;Acc:MGI:2149961]
862	ENSMUSG00000022488	0.621548	0.00601967	Nckap1l	NCK associated protein 1 like [Source:MGI Symbol;Acc:MGI:1926063]
863	ENSMUSG00000033491	-0.847224	0.00603812	Prss35	protease, serine 35 [Source:MGI Symbol;Acc:MGI:2444800]
864	ENSMUSG00000078607	0.606992	0.00608543	1810010H24Rik	RIKEN cDNA 1810010H24 gene [Source:MGI Symbol;Acc:MGI:1916316]
865	ENSMUSG00000002699	0.975314	0.00622825	Lcp2	lymphocyte cytosolic protein 2 [Source:MGI Symbol;Acc:MGI:1321402]
866	ENSMUSG00000008398	0.701994	0.00625576	Elk3	ELK3, member of ETS oncogene family [Source:MGI Symbol;Acc:MGI:101762]
867	ENSMUSG00000038811	1.1882	0.00637261	Gngt2	guanine nucleotide binding protein (G protein), gamma transducing activity polypeptide 2 [Source:MGI Symbol;Acc:MGI:893584]
868	ENSMUSG00000053113	0.839259	0.00644417	Socs3	suppressor of cytokine signaling 3 [Source:MGI Symbol;Acc:MGI:1201791]
869	ENSMUSG00000022146	1.55681	0.00646261	Osmr	oncostatin M receptor [Source:MGI Symbol;Acc:MGI:1330819]
870	ENSMUSG00000036570	0.598567	0.00650716	Fxyd1	FXYD domain-containing ion transport regulator 1 [Source:MGI Symbol;Acc:MGI:1889273]
871	ENSMUSG00000039480	0.762525	0.00652643	Nt5dc1	5'-nucleotidase domain containing 1 [Source:MGI Symbol;Acc:MGI:2442446]
872	ENSMUSG00000042228	0.802978	0.00670671	Lyn	LYN proto-oncogene, Src family tyrosine kinase [Source:MGI Symbol;Acc:MGI:96892]
873	ENSMUSG00000023224	0.798647	0.00671087	Serping1	serine (or cysteine) peptidase inhibitor, clade G, member 1 [Source:MGI Symbol;Acc:MGI:894696]
874	ENSMUSG00000039013	2.03438	0.00672588	Siglecf	sialic acid binding Ig-like lectin F [Source:MGI Symbol;Acc:MGI:2681107]
875	ENSMUSG00000010067	0.601457	0.00680875	Rassf1	Ras association (RalGDS/AF-6) domain family member 1 [Source:MGI Symbol;Acc:MGI:1928386]
876	ENSMUSG00000024670	-1.45769	0.00684232	Cd6	CD6 antigen [Source:MGI Symbol;Acc:MGI:103566]
877	ENSMUSG00000025355	1.26783	0.00686177	Mmp19	matrix metallopeptidase 19 [Source:MGI Symbol;Acc:MGI:1927899]
878	ENSMUSG00000074252	0.922387	0.00690153	Gm10654	predicted gene 10654 [Source:MGI Symbol;Acc:MGI:3643366]
879	ENSMUSG00000099583	1.70079	0.00708475	Hist1h3d	H3 clustered histone 4 [Source:MGI Symbol;Acc:MGI:2448322]
880	ENSMUSG00000095675	2.08977	0.00712053	Ccl21b	chemokine (C-C motif) ligand 21B (leucine) [Source:MGI Symbol;Acc:MGI:1349182]
881	ENSMUSG00000100396	-1.16756	0.0072177	Gm29367	predicted gene 29367 [Source:MGI Symbol;Acc:MGI:5580073]
882	ENSMUSG00000032548	0.794861	0.00722227	Slco2a1	solute carrier organic anion transporter family, member 2a1 [Source:MGI Symbol;Acc:MGI:1346021]
883	ENSMUSG00000071637	1.34757	0.00742559	Cebpd	CCAAT/enhancer binding protein (C/EBP), delta [Source:MGI Symbol;Acc:MGI:103573]
884	ENSMUSG00000087022	-0.645128	0.00743946	9130024F11Rik	RIKEN cDNA 9130024F11 gene [Source:MGI Symbol;Acc:MGI:1926150]
885	ENSMUSG00000006445	0.809132	0.00747256	Epha2	Eph receptor A2 [Source:MGI Symbol;Acc:MGI:95278]
886	ENSMUSG00000033192	0.758831	0.00763204	Lpcat2	lysophosphatidylcholine acyltransferase 2 [Source:MGI Symbol;Acc:MGI:3606214]
887	ENSMUSG00000007891	0.928661	0.00766379	Ctsd	cathepsin D [Source:MGI Symbol;Acc:MGI:88562]
888	ENSMUSG00000079553	1.25224	0.00767834	Kifc1	kinesin family member C1 [Source:MGI Symbol;Acc:MGI:109596]
889	ENSMUSG00000044014	-0.829317	0.00771743	Npy5r	neuropeptide Y receptor Y5 [Source:MGI Symbol;Acc:MGI:108082]
890	ENSMUSG00000028073	0.626031	0.00780154	Pear1	platelet endothelial aggregation receptor 1 [Source:MGI Symbol;Acc:MGI:1920432]
891	ENSMUSG00000042638	1.38254	0.00780154	Gucy2c	guanylate cyclase 2c [Source:MGI Symbol;Acc:MGI:106903]
892	ENSMUSG00000026786	0.941125	0.00786555	Apbb1ip	amyloid beta (A4) precursor protein-binding, family B, member 1 interacting protein [Source:MGI Symbol;Acc:MGI:1861354]
893	ENSMUSG00000056032	2.10283	0.00786742	BC018473	cDNA sequence BC018473 [Source:MGI Symbol;Acc:MGI:3039625]
894	ENSMUSG00000095276	1.42798	0.00803934	Gfy	golgi-associated olfactory signaling regulator [Source:MGI Symbol;Acc:MGI:2685427]
895	ENSMUSG00000052819	2.68871	0.00814793	Best2	bestrophin 2 [Source:MGI Symbol;Acc:MGI:2387588]
896	ENSMUSG00000080797	0.864341	0.00825645	Gm15760	predicted gene 15760 [Source:MGI Symbol;Acc:MGI:3642834]
897	ENSMUSG00000109032	1.07245	0.00833835	Gm7972	predicted gene 7972 [Source:MGI Symbol;Acc:MGI:3647337]
898	ENSMUSG00000114277	1.19863	0.00836115	Gm48583	predicted gene, 48583 [Source:MGI Symbol;Acc:MGI:6098152]
899	ENSMUSG00000116589	1.69531	0.00839123	CT030190.1	predicted gene, 31323 [Source:MGI Symbol;Acc:MGI:5590482]
900	ENSMUSG00000082088	1.56088	0.00840114	Gm15753	predicted gene 15753 [Source:MGI Symbol;Acc:MGI:3783195]
901	ENSMUSG00000045509	-0.706381	0.00845099	Gpr150	G protein-coupled receptor 150 [Source:MGI Symbol;Acc:MGI:2441872]
902	ENSMUSG00000030157	0.740768	0.00849342	Clec2d	C-type lectin domain family 2, member d [Source:MGI Symbol;Acc:MGI:2135589]
903	ENSMUSG00000074136	1.71212	0.00852023	4930513N10Rik	RIKEN cDNA 4930513N10 gene [Source:MGI Symbol;Acc:MGI:2443064]
904	ENSMUSG00000009596	1.2909	0.00875398	Taf7l	TATA-box binding protein associated factor 7 like [Source:MGI Symbol;Acc:MGI:1921719]
905	ENSMUSG00000053007	0.679423	0.00880035	Creb5	cAMP responsive element binding protein 5 [Source:MGI Symbol;Acc:MGI:2443973]
906	ENSMUSG00000039238	2.04821	0.00887183	Zfp750	zinc finger protein 750 [Source:MGI Symbol;Acc:MGI:2442210]
907	ENSMUSG00000098061	-1.39882	0.00891101	Gm26945
908	ENSMUSG00000030579	1.33833	0.00892192	Tyrobp	TYRO protein tyrosine kinase binding protein [Source:MGI Symbol;Acc:MGI:1277211]
909	ENSMUSG00000058260	-0.703907	0.00892218	Serpina9	serine (or cysteine) peptidase inhibitor, clade A (alpha-1 antiproteinase, antitrypsin), member 9 [Source:MGI Symbol;Acc:MGI:1919157]
910	ENSMUSG00000116641	-0.67105	0.00895027	AC165271.1	predicted gene, 41505 [Source:MGI Symbol;Acc:MGI:5624390]
911	ENSMUSG00000079491	1.09631	0.00895584	H2-T10	histocompatibility 2, T region locus 10 [Source:MGI Symbol;Acc:MGI:95942]
912	ENSMUSG00000005107	1.27425	0.00900248	Slc2a9	solute carrier family 2 (facilitated glucose transporter), member 9 [Source:MGI Symbol;Acc:MGI:2152844]
913	ENSMUSG00000032089	0.675373	0.00901716	Il10ra	interleukin 10 receptor, alpha [Source:MGI Symbol;Acc:MGI:96538]
914	ENSMUSG00000069893	1.54154	0.00907778	9930111J21Rik1	RIKEN cDNA 9930111J21 gene 1 [Source:MGI Symbol;Acc:MGI:3041173]
915	ENSMUSG00000023345	-0.652937	0.00911271	Poc1a	POC1 centriolar protein A [Source:MGI Symbol;Acc:MGI:1917485]
916	ENSMUSG00000031698	-1.05599	0.00914348	Mylk3	myosin light chain kinase 3 [Source:MGI Symbol;Acc:MGI:2443063]
917	ENSMUSG00000037336	1.05034	0.00921832	Mfsd2b	major facilitator superfamily domain containing 2B [Source:MGI Symbol;Acc:MGI:3583946]
918	ENSMUSG00000091898	-0.77038	0.00931618	Tnnc1	troponin C, cardiac/slow skeletal [Source:MGI Symbol;Acc:MGI:98779]
919	ENSMUSG00000023755	0.647965	0.00936723	Rhebl1	Ras homolog enriched in brain like 1 [Source:MGI Symbol;Acc:MGI:1916409]
920	ENSMUSG00000020227	1.1997	0.00951829	Irak3	interleukin-1 receptor-associated kinase 3 [Source:MGI Symbol;Acc:MGI:1921164]
921	ENSMUSG00000093577	0.891623	0.009543	Gm20632	predicted gene 20632 [Source:MGI Symbol;Acc:MGI:5313079]
922	ENSMUSG00000097604	-1.20198	0.00955264	Gm17322	predicted gene, 17322 [Source:MGI Symbol;Acc:MGI:4936956]
923	ENSMUSG00000043157	1.63239	0.00972981	Arl11	ADP-ribosylation factor-like 11 [Source:MGI Symbol;Acc:MGI:2444054]
924	ENSMUSG00000002257	1.13866	0.00980938	Def6	differentially expressed in FDCP 6 [Source:MGI Symbol;Acc:MGI:1346328]
925	ENSMUSG00000079547	1.1978	0.00984317	H2-DMb1	histocompatibility 2, class II, locus Mb1 [Source:MGI Symbol;Acc:MGI:95922]
926	ENSMUSG00000048827	0.884746	0.00984843	Pkd1l3	polycystic kidney disease 1 like 3 [Source:MGI Symbol;Acc:MGI:2664670]
927	ENSMUSG00000071203	1.21483	0.0098547	Naip5	NLR family, apoptosis inhibitory protein 5 [Source:MGI Symbol;Acc:MGI:1298220]
928	ENSMUSG00000052631	1.25029	0.00990961	Sh2d6	SH2 domain containing 6 [Source:MGI Symbol;Acc:MGI:1918380]
929	ENSMUSG00000030867	1.05395	0.0099336	Plk1	polo like kinase 1 [Source:MGI Symbol;Acc:MGI:97621]
930	ENSMUSG00000022309	0.657479	0.00993425	Angpt1	angiopoietin 1 [Source:MGI Symbol;Acc:MGI:108448]
931	ENSMUSG00000022369	0.834796	0.00994825	Mtbp	Mdm2, transformed 3T3 cell double minute p53 binding protein [Source:MGI Symbol;Acc:MGI:2146005]
932	ENSMUSG00000024529	1.29761	0.0103663	Lox	lysyl oxidase [Source:MGI Symbol;Acc:MGI:96817]
933	ENSMUSG00000049130	1.30491	0.0106077	C5ar1	complement component 5a receptor 1 [Source:MGI Symbol;Acc:MGI:88232]
934	ENSMUSG00000029359	-0.589462	0.0106132	Tesc	tescalcin [Source:MGI Symbol;Acc:MGI:1930803]
935	ENSMUSG00000087153	0.903662	0.0108529	Gm6483	predicted gene 6483 [Source:MGI Symbol;Acc:MGI:3644574]
936	ENSMUSG00000031880	1.16028	0.0108529	Rrad	Ras-related associated with diabetes [Source:MGI Symbol;Acc:MGI:1930943]
937	ENSMUSG00000017713	0.765327	0.01088	Tha1	threonine aldolase 1 [Source:MGI Symbol;Acc:MGI:1919026]
938	ENSMUSG00000102813	0.808679	0.0109593	Gm37795	predicted gene, 37795 [Source:MGI Symbol;Acc:MGI:5611023]
939	ENSMUSG00000038352	1.15882	0.011135	Arl5c	ADP-ribosylation factor-like 5C [Source:MGI Symbol;Acc:MGI:3028577]
940	ENSMUSG00000103649	0.826339	0.0111679	Gm37768	predicted gene, 37768 [Source:MGI Symbol;Acc:MGI:5610996]
941	ENSMUSG00000038115	-0.796941	0.0111916	Ano2	anoctamin 2 [Source:MGI Symbol;Acc:MGI:2387214]
942	ENSMUSG00000028211	0.651536	0.0112377	Trp53inp1	transformation related protein 53 inducible nuclear protein 1 [Source:MGI Symbol;Acc:MGI:1926609]
943	ENSMUSG00000030342	0.883454	0.0112461	Cd9	CD9 antigen [Source:MGI Symbol;Acc:MGI:88348]
944	ENSMUSG00000031488	0.672968	0.0113603	Rab11fip1	RAB11 family interacting protein 1 (class I) [Source:MGI Symbol;Acc:MGI:1923017]
945	ENSMUSG00000029452	0.701916	0.0113603	Tmem116	transmembrane protein 116 [Source:MGI Symbol;Acc:MGI:1924712]
946	ENSMUSG00000085287	0.862604	0.0113603	4833418N02Rik	RIKEN cDNA 4833418N02 gene [Source:MGI Symbol;Acc:MGI:1921847]
947	ENSMUSG00000036655	1.66449	0.0113631	Colec11	collectin sub-family member 11 [Source:MGI Symbol;Acc:MGI:1918943]
948	ENSMUSG00000096001	1.98807	0.0113872	2610528A11Rik	RIKEN cDNA 2610528A11 gene [Source:MGI Symbol;Acc:MGI:1917295]
949	ENSMUSG00000030263	1.00857	0.0114398	Lrmp	inositol 1,4,5-triphosphate receptor associated 2 [Source:MGI Symbol;Acc:MGI:108424]
950	ENSMUSG00000035594	-1.01559	0.011566	Chrna5	cholinergic receptor, nicotinic, alpha polypeptide 5 [Source:MGI Symbol;Acc:MGI:87889]
951	ENSMUSG00000101249	-1.19026	0.0116939	Gm29216	predicted gene 29216 [Source:MGI Symbol;Acc:MGI:5579922]
952	ENSMUSG00000058625	-0.586078	0.0116987	Gm17383	predicted gene, 17383 [Source:MGI Symbol;Acc:MGI:4937017]
953	ENSMUSG00000001918	0.734035	0.0116987	Slc1a5	solute carrier family 1 (neutral amino acid transporter), member 5 [Source:MGI Symbol;Acc:MGI:105305]
954	ENSMUSG00000035745	1.60773	0.0117447	Grin3b	glutamate receptor, ionotropic, NMDA3B [Source:MGI Symbol;Acc:MGI:2150393]
955	ENSMUSG00000035984	-0.604851	0.0119446	Nme5	NME/NM23 family member 5 [Source:MGI Symbol;Acc:MGI:1922783]
956	ENSMUSG00000087516	1.20341	0.011966	Tbx3os1	T-box 3, opposite strand 1 [Source:MGI Symbol;Acc:MGI:3780472]
957	ENSMUSG00000095247	-1.30688	0.0120027	Ccl27a
958	ENSMUSG00000021886	2.63012	0.012022	Gpr65	G-protein coupled receptor 65 [Source:MGI Symbol;Acc:MGI:108031]
959	ENSMUSG00000001103	-1.13102	0.0120495	Sebox	SEBOX homeobox [Source:MGI Symbol;Acc:MGI:108012]
960	ENSMUSG00000046186	1.11178	0.0120594	Cd109	CD109 antigen [Source:MGI Symbol;Acc:MGI:2445221]
961	ENSMUSG00000047810	0.707845	0.0120815	Ccdc88b	coiled-coil domain containing 88B [Source:MGI Symbol;Acc:MGI:1925567]
962	ENSMUSG00000078942	1.51181	0.012194	Naip6	NLR family, apoptosis inhibitory protein 6 [Source:MGI Symbol;Acc:MGI:1298222]
963	ENSMUSG00000057719	-0.672459	0.0123144	Sh3rf2	SH3 domain containing ring finger 2 [Source:MGI Symbol;Acc:MGI:2444628]
964	ENSMUSG00000024610	0.774038	0.0124203	Cd74	CD74 antigen (invariant polypeptide of major histocompatibility complex, class II antigen-associated) [Source:MGI Symbol;Acc:MGI:96534]
965	ENSMUSG00000024334	2.39023	0.0125614	H2-Oa	histocompatibility 2, O region alpha locus [Source:MGI Symbol;Acc:MGI:95924]
966	ENSMUSG00000116121	2.02357	0.0126039	Gm49486	predicted gene, 49486 [Source:MGI Symbol;Acc:MGI:6155161]
967	ENSMUSG00000051506	0.90418	0.0129729	Wdfy4	WD repeat and FYVE domain containing 4 [Source:MGI Symbol;Acc:MGI:3584510]
968	ENSMUSG00000031323	-0.802778	0.0130404	Dmrtc1a	DMRT-like family C1a [Source:MGI Symbol;Acc:MGI:1918137]
969	ENSMUSG00000068117	-0.753325	0.0130404	Mei1	meiotic double-stranded break formation protein 1 [Source:MGI Symbol;Acc:MGI:3028590]
970	ENSMUSG00000073130	1.37957	0.0130978	Gm1141	predicted gene 1141 [Source:MGI Symbol;Acc:MGI:2685987]
971	ENSMUSG00000094282	2.1116	0.0131153	Cfap73	cilia and flagella associated protein 73 [Source:MGI Symbol;Acc:MGI:3779542]
972	ENSMUSG00000039450	0.613501	0.0131714	Dcxr	dicarbonyl L-xylulose reductase [Source:MGI Symbol;Acc:MGI:1915130]
973	ENSMUSG00000023931	1.6512	0.0132328	Efhb	EF hand domain family, member B [Source:MGI Symbol;Acc:MGI:3045296]
974	ENSMUSG00000078486	0.635721	0.0132442	Perm1	PPARGC1 and ESRR induced regulator, muscle 1 [Source:MGI Symbol;Acc:MGI:1921433]
975	ENSMUSG00000047205	-0.590343	0.01353	Dusp18	dual specificity phosphatase 18 [Source:MGI Symbol;Acc:MGI:1922469]
976	ENSMUSG00000092021	1.6576	0.0135731	Gbp11	guanylate binding protein 11 [Source:MGI Symbol;Acc:MGI:3646307]
977	ENSMUSG00000005251	1.17855	0.013735	Ripk4	receptor-interacting serine-threonine kinase 4 [Source:MGI Symbol;Acc:MGI:1919638]
978	ENSMUSG00000113362	1.56698	0.0139829	Gm40557	predicted gene, 40557 [Source:MGI Symbol;Acc:MGI:5623442]
979	ENSMUSG00000056459	0.583401	0.0140568	Zbtb25	zinc finger and BTB domain containing 25 [Source:MGI Symbol;Acc:MGI:99197]
980	ENSMUSG00000104960	0.584667	0.0140644	Snhg8	small nucleolar RNA host gene 8 [Source:MGI Symbol;Acc:MGI:1917145]
981	ENSMUSG00000074052	1.7345	0.0141367	BC048644	cDNA sequence BC048644 [Source:MGI Symbol;Acc:MGI:3039566]
982	ENSMUSG00000046223	1.16358	0.0141904	Plaur	plasminogen activator, urokinase receptor [Source:MGI Symbol;Acc:MGI:97612]
983	ENSMUSG00000047875	0.749395	0.0143809	Gpr157	G protein-coupled receptor 157 [Source:MGI Symbol;Acc:MGI:2442046]
984	ENSMUSG00000073274	1.65456	0.0145266	Gm14636	predicted gene 14636 [Source:MGI Symbol;Acc:MGI:3641976]
985	ENSMUSG00000060441	1.32001	0.0145399	Trim5	tripartite motif-containing 5 [Source:MGI Symbol;Acc:MGI:3646853]
986	ENSMUSG00000041431	1.68454	0.014692	Ccnb1	cyclin B1 [Source:MGI Symbol;Acc:MGI:88302]
987	ENSMUSG00000042641	-0.952053	0.0148038	Rgsl1	regulator of G-protein signaling like 1 [Source:MGI Symbol;Acc:MGI:2685048]
988	ENSMUSG00000018238	1.38782	0.0151055	Gdf9	growth differentiation factor 9 [Source:MGI Symbol;Acc:MGI:95692]
989	ENSMUSG00000025572	0.621208	0.0152615	Tmc6	transmembrane channel-like gene family 6 [Source:MGI Symbol;Acc:MGI:1098686]
990	ENSMUSG00000047832	0.641931	0.0152703	Cdca4	cell division cycle associated 4 [Source:MGI Symbol;Acc:MGI:1919213]
991	ENSMUSG00000047330	0.958408	0.0153363	Kcne4	potassium voltage-gated channel, Isk-related subfamily, gene 4 [Source:MGI Symbol;Acc:MGI:1891125]
992	ENSMUSG00000105590	1.37004	0.0154332	Gm43364	predicted gene 43364 [Source:MGI Symbol;Acc:MGI:5663501]
993	ENSMUSG00000074796	1.01427	0.0154474	Slc4a11	solute carrier family 4, sodium bicarbonate transporter-like, member 11 [Source:MGI Symbol;Acc:MGI:2138987]
994	ENSMUSG00000107451	0.693859	0.0155428	Gm44421	predicted gene, 44421 [Source:MGI Symbol;Acc:MGI:5690813]
995	ENSMUSG00000078640	-1.22003	0.0156233	Gm11627	predicted gene 11627 [Source:MGI Symbol;Acc:MGI:3650659]
996	ENSMUSG00000028159	0.663155	0.0158209	Dapp1	dual adaptor for phosphotyrosine and 3-phosphoinositides 1 [Source:MGI Symbol;Acc:MGI:1347063]
997	ENSMUSG00000097028	1.47351	0.0158693	Ptgs2os	prostaglandin-endoperoxide synthase 2, opposite strand [Source:MGI Symbol;Acc:MGI:2443180]
998	ENSMUSG00000021228	-0.962721	0.0159682	Acot3	acyl-CoA thioesterase 3 [Source:MGI Symbol;Acc:MGI:2159619]
999	ENSMUSG00000034957	0.614713	0.0159719	Cebpa	CCAAT/enhancer binding protein (C/EBP), alpha [Source:MGI Symbol;Acc:MGI:99480]
1000	ENSMUSG00000034792	0.838211	0.0160187	Gna15	guanine nucleotide binding protein, alpha 15 [Source:MGI Symbol;Acc:MGI:95770]
1001	ENSMUSG00000087366	1.19688	0.016529	Junos	jun proto-oncogene, opposite strand [Source:MGI Symbol;Acc:MGI:2652837]
1002	ENSMUSG00000040528	2.21798	0.0167621	Milr1	mast cell immunoglobulin like receptor 1 [Source:MGI Symbol;Acc:MGI:2685731]
1003	ENSMUSG00000042549	1.25948	0.0169087	Map2k3os	mitogen-activated protein kinase kinase 3, opposite strand [Source:MGI Symbol;Acc:MGI:1344334]
1004	ENSMUSG00000006014	0.716272	0.0170099	Prg4	proteoglycan 4 (megakaryocyte stimulating factor, articular superficial zone protein) [Source:MGI Symbol;Acc:MGI:1891344]
1005	ENSMUSG00000005465	2.01419	0.0171722	Il27ra	interleukin 27 receptor, alpha [Source:MGI Symbol;Acc:MGI:1355318]
1006	ENSMUSG00000083563	-0.659494	0.017409	Gm13340	predicted gene 13340 [Source:MGI Symbol;Acc:MGI:3650227]
1007	ENSMUSG00000006611	0.605762	0.0175827	Hfe	homeostatic iron regulator [Source:MGI Symbol;Acc:MGI:109191]
1008	ENSMUSG00000060591	0.677223	0.0176274	Ifitm2	interferon induced transmembrane protein 2 [Source:MGI Symbol;Acc:MGI:1933382]
1009	ENSMUSG00000058818	1.431	0.0177261	Pirb	paired Ig-like receptor B [Source:MGI Symbol;Acc:MGI:894311]
1010	ENSMUSG00000039116	-0.688412	0.0178082	Adgrg6	adhesion G protein-coupled receptor G6 [Source:MGI Symbol;Acc:MGI:1916151]
1011	ENSMUSG00000117238	1.57036	0.0178354	AC139131.1	novel transcript
1012	ENSMUSG00000027408	0.594961	0.0180392	Cpxm1	carboxypeptidase X 1 (M14 family) [Source:MGI Symbol;Acc:MGI:1934569]
1013	ENSMUSG00000052085	0.714361	0.0181959	Dock8	dedicator of cytokinesis 8 [Source:MGI Symbol;Acc:MGI:1921396]
1014	ENSMUSG00000033952	1.5837	0.0181959	Aspm	abnormal spindle microtubule assembly [Source:MGI Symbol;Acc:MGI:1334448]
1015	ENSMUSG00000108732	1.4246	0.0182556	2310043P16Rik	RIKEN cDNA 2310043P16 gene [Source:MGI Symbol;Acc:MGI:1917385]
1016	ENSMUSG00000020330	1.78302	0.0183627	Hmmr	hyaluronan mediated motility receptor (RHAMM) [Source:MGI Symbol;Acc:MGI:104667]
1017	ENSMUSG00000022101	1.44489	0.0184697	Fgf17	fibroblast growth factor 17 [Source:MGI Symbol;Acc:MGI:1202401]
1018	ENSMUSG00000102018	1.10085	0.0186502	K230010J24Rik	IQ motif and ankyrin repeat containing 1 [Source:MGI Symbol;Acc:MGI:3588184]
1019	ENSMUSG00000105096	3.68688	0.0187907	Gbp10	guanylate-binding protein 10 [Source:MGI Symbol;Acc:MGI:4359647]
1020	ENSMUSG00000027947	0.600822	0.018944	Il6ra	interleukin 6 receptor, alpha [Source:MGI Symbol;Acc:MGI:105304]
1021	ENSMUSG00000111118	1.49098	0.0190378	Gm6545	predicted gene 6545 [Source:MGI Symbol;Acc:MGI:3643874]
1022	ENSMUSG00000066721	-0.590967	0.0191507	Zfp575	zinc finger protein 575 [Source:MGI Symbol;Acc:MGI:2141921]
1023	ENSMUSG00000042419	0.803373	0.0192914	Nfkbil1	nuclear factor of kappa light polypeptide gene enhancer in B cells inhibitor like 1 [Source:MGI Symbol;Acc:MGI:1340031]
1024	ENSMUSG00000111837	0.677753	0.0194678	Gm47135	predicted gene, 47135 [Source:MGI Symbol;Acc:MGI:6095892]
1025	ENSMUSG00000115338	0.638526	0.0194999	Pnp	purine-nucleoside phosphorylase [Source:MGI Symbol;Acc:MGI:97365]
1026	ENSMUSG00000037860	0.687403	0.019812	Aim2	absent in melanoma 2 [Source:MGI Symbol;Acc:MGI:2686159]
1027	ENSMUSG00000020072	1.14942	0.0199087	Pbld2	phenazine biosynthesis-like protein domain containing 2 [Source:MGI Symbol;Acc:MGI:1914557]
1028	ENSMUSG00000024598	-0.858503	0.0199473	Fbn2	fibrillin 2 [Source:MGI Symbol;Acc:MGI:95490]
1029	ENSMUSG00000086740	2.05484	0.0199831	Gm17029	predicted gene 17029 [Source:MGI Symbol;Acc:MGI:4937856]
1030	ENSMUSG00000025888	0.92421	0.0201796	Casp1	caspase 1 [Source:MGI Symbol;Acc:MGI:96544]
1031	ENSMUSG00000031803	0.993189	0.0201796	B3gnt3	UDP-GlcNAc:betaGal beta-1,3-N-acetylglucosaminyltransferase 3 [Source:MGI Symbol;Acc:MGI:2152535]
1032	ENSMUSG00000037313	0.634955	0.0203586	Tacc3	transforming, acidic coiled-coil containing protein 3 [Source:MGI Symbol;Acc:MGI:1341163]
1033	ENSMUSG00000010651	1.51211	0.0204405	Acaa1b	acetyl-Coenzyme A acyltransferase 1B [Source:MGI Symbol;Acc:MGI:3605455]
1034	ENSMUSG00000004952	0.581277	0.0205431	Rasa4	RAS p21 protein activator 4 [Source:MGI Symbol;Acc:MGI:1858600]
1035	ENSMUSG00000034063	0.72174	0.0206893	4930590J08Rik	RIKEN cDNA 4930590J08 gene [Source:MGI Symbol;Acc:MGI:2685917]
1036	ENSMUSG00000036832	-1.81905	0.0206971	Lpar3	lysophosphatidic acid receptor 3 [Source:MGI Symbol;Acc:MGI:1929469]
1037	ENSMUSG00000031497	0.816709	0.0207308	Tnfsf13b	tumor necrosis factor (ligand) superfamily, member 13b [Source:MGI Symbol;Acc:MGI:1344376]
1038	ENSMUSG00000097006	0.768746	0.0208267	9530082P21Rik	RIKEN cDNA 9530082P21 gene [Source:MGI Symbol;Acc:MGI:3603340]
1039	ENSMUSG00000013707	0.970952	0.0209333	Tnfaip8l2	tumor necrosis factor, alpha-induced protein 8-like 2 [Source:MGI Symbol;Acc:MGI:1917019]
1040	ENSMUSG00000075122	1.22909	0.0211429	Cd80	CD80 antigen [Source:MGI Symbol;Acc:MGI:101775]
1041	ENSMUSG00000033581	0.794269	0.0212596	Igf2bp2	insulin-like growth factor 2 mRNA binding protein 2 [Source:MGI Symbol;Acc:MGI:1890358]
1042	ENSMUSG00000050270	1.08593	0.0212867	Tmem220	transmembrane protein 220 [Source:MGI Symbol;Acc:MGI:2443691]
1043	ENSMUSG00000081058	0.784318	0.0215391	Hist2h3c2	H3 clustered histone 15 [Source:MGI Symbol;Acc:MGI:2448357]
1044	ENSMUSG00000051735	0.992213	0.021646	Rinl	Ras and Rab interactor-like [Source:MGI Symbol;Acc:MGI:2444024]
1045	ENSMUSG00000020007	-1.7506	0.0217408	Il20ra	interleukin 20 receptor, alpha [Source:MGI Symbol;Acc:MGI:3605069]
1046	ENSMUSG00000017756	0.5911	0.0218141	Slc12a7	solute carrier family 12, member 7 [Source:MGI Symbol;Acc:MGI:1342283]
1047	ENSMUSG00000020897	2.14336	0.021872	Aurkb	aurora kinase B [Source:MGI Symbol;Acc:MGI:107168]
1048	ENSMUSG00000005705	1.17209	0.0219247	Agrp	agouti related neuropeptide [Source:MGI Symbol;Acc:MGI:892013]
1049	ENSMUSG00000055761	-0.621497	0.0219786	Nkain3	Na+/K+ transporting ATPase interacting 3 [Source:MGI Symbol;Acc:MGI:2444830]
1050	ENSMUSG00000034394	1.22972	0.0220038	Lif	leukemia inhibitory factor [Source:MGI Symbol;Acc:MGI:96787]
1051	ENSMUSG00000113238	1.08572	0.0221063	Gm47251	predicted gene, 47251 [Source:MGI Symbol;Acc:MGI:6096078]
1052	ENSMUSG00000084862	1.19991	0.0221465	Gm16278	predicted gene 16278 [Source:MGI Symbol;Acc:MGI:3826602]
1053	ENSMUSG00000038037	1.02086	0.0221941	Socs1	suppressor of cytokine signaling 1 [Source:MGI Symbol;Acc:MGI:1354910]
1054	ENSMUSG00000001131	1.41702	0.0230033	Timp1	tissue inhibitor of metalloproteinase 1 [Source:MGI Symbol;Acc:MGI:98752]
1055	ENSMUSG00000036553	0.861545	0.0231619	Sh3tc1	SH3 domain and tetratricopeptide repeats 1 [Source:MGI Symbol;Acc:MGI:2678949]
1056	ENSMUSG00000086942	1.51586	0.0231619	Gm15489	predicted gene 15489 [Source:MGI Symbol;Acc:MGI:3705099]
1057	ENSMUSG00000032691	1.13507	0.023314	Nlrp3	NLR family, pyrin domain containing 3 [Source:MGI Symbol;Acc:MGI:2653833]
1058	ENSMUSG00000033488	0.595018	0.0235498	Cryzl2	crystallin zeta like 2 [Source:MGI Symbol;Acc:MGI:2448516]
1059	ENSMUSG00000106928	0.88163	0.0236139	Gm43860	predicted gene 43860 [Source:MGI Symbol;Acc:MGI:5663997]
1060	ENSMUSG00000052270	1.82501	0.0236139	Fpr2	formyl peptide receptor 2 [Source:MGI Symbol;Acc:MGI:1278319]
1061	ENSMUSG00000003779	0.737392	0.0238087	Kif20a	kinesin family member 20A [Source:MGI Symbol;Acc:MGI:1201682]
1062	ENSMUSG00000086453	1.666	0.023831	Gm11457	predicted gene 11457 [Source:MGI Symbol;Acc:MGI:3705139]
1063	ENSMUSG00000021902	0.582213	0.0241342	Phf7	PHD finger protein 7 [Source:MGI Symbol;Acc:MGI:1919088]
1064	ENSMUSG00000110924	-1.56325	0.0241342	Gm40518	predicted gene, 40518 [Source:MGI Symbol;Acc:MGI:5623403]
1065	ENSMUSG00000071456	0.621718	0.0242861	1110002L01Rik	RIKEN cDNA 1110002L01 gene [Source:MGI Symbol;Acc:MGI:1915821]
1066	ENSMUSG00000070369	1.68926	0.0243248	Itgad	integrin, alpha D [Source:MGI Symbol;Acc:MGI:3578624]
1067	ENSMUSG00000048277	0.583427	0.0243566	Syngr2	synaptogyrin 2 [Source:MGI Symbol;Acc:MGI:1328324]
1068	ENSMUSG00000067586	0.701338	0.024584	S1pr3	sphingosine-1-phosphate receptor 3 [Source:MGI Symbol;Acc:MGI:1339365]
1069	ENSMUSG00000087128	0.884462	0.024588	Gm12655	predicted gene 12655 [Source:MGI Symbol;Acc:MGI:3651648]
1070	ENSMUSG00000049625	0.803346	0.0246161	Tifab	TRAF-interacting protein with forkhead-associated domain, family member B [Source:MGI Symbol;Acc:MGI:2385852]
1071	ENSMUSG00000050534	-0.793592	0.0246546	Htr5b	5-hydroxytryptamine (serotonin) receptor 5B [Source:MGI Symbol;Acc:MGI:96284]
1072	ENSMUSG00000045394	1.55589	0.0248041	Epcam	epithelial cell adhesion molecule [Source:MGI Symbol;Acc:MGI:106653]
1073	ENSMUSG00000085609	0.687955	0.024818	1700016P03Rik	RIKEN cDNA 1700016P03 gene [Source:MGI Symbol;Acc:MGI:1922792]
1074	ENSMUSG00000069939	-0.733646	0.0248803	Gm12070	predicted gene 12070 [Source:MGI Symbol;Acc:MGI:3650751]
1075	ENSMUSG00000112466	-0.849588	0.0249982	Gm29674	predicted gene, 29674 [Source:MGI Symbol;Acc:MGI:5588833]
1076	ENSMUSG00000087530	1.58976	0.0256438	Gm15533	predicted gene 15533 [Source:MGI Symbol;Acc:MGI:3782982]
1077	ENSMUSG00000085169	0.87899	0.0256798	Gm10785	predicted gene 10785 [Source:MGI Symbol;Acc:MGI:3642149]
1078	ENSMUSG00000024677	1.34196	0.0257055	Ms4a6b	membrane-spanning 4-domains, subfamily A, member 6B [Source:MGI Symbol;Acc:MGI:1917024]
1079	ENSMUSG00000040829	1.2061	0.0257577	Zmynd15	zinc finger, MYND-type containing 15 [Source:MGI Symbol;Acc:MGI:3603821]
1080	ENSMUSG00000043286	1.71405	0.025807	Pnpla1	patatin-like phospholipase domain containing 1 [Source:MGI Symbol;Acc:MGI:3617850]
1081	ENSMUSG00000030830	1.13427	0.0259507	Itgal	integrin alpha L [Source:MGI Symbol;Acc:MGI:96606]
1082	ENSMUSG00000003812	0.752187	0.0262371	Dnase2a	deoxyribonuclease II alpha [Source:MGI Symbol;Acc:MGI:1329019]
1083	ENSMUSG00000004885	0.730642	0.0263139	Crabp2	cellular retinoic acid binding protein II [Source:MGI Symbol;Acc:MGI:88491]
1084	ENSMUSG00000102985	-1.40311	0.0264873	4930456G14Rik	RIKEN cDNA 4930456G14 gene [Source:MGI Symbol;Acc:MGI:1921928]
1085	ENSMUSG00000050106	1.58668	0.0264886	Tmc8	transmembrane channel-like gene family 8 [Source:MGI Symbol;Acc:MGI:2669037]
1086	ENSMUSG00000034041	0.700665	0.0266433	Lyl1	lymphoblastomic leukemia 1 [Source:MGI Symbol;Acc:MGI:96891]
1087	ENSMUSG00000100876	1.30744	0.0266599	2810454H06Rik	RIKEN cDNA 2810454H06 gene [Source:MGI Symbol;Acc:MGI:1920063]
1088	ENSMUSG00000024842	1.43092	0.0271187	Cabp4	calcium binding protein 4 [Source:MGI Symbol;Acc:MGI:1920910]
1089	ENSMUSG00000101939	-0.70386	0.0271352	Gm28438	predicted gene 28438 [Source:MGI Symbol;Acc:MGI:5579144]
1090	ENSMUSG00000020930	0.866082	0.0276599	Ccdc103	coiled-coil domain containing 103 [Source:MGI Symbol;Acc:MGI:1920543]
1091	ENSMUSG00000070031	1.85524	0.0278469	Sp140	Sp140 nuclear body protein [Source:MGI Symbol;Acc:MGI:3702467]
1092	ENSMUSG00000066245	1.49067	0.0279679	Gm10156	predicted gene 10156 [Source:MGI Symbol;Acc:MGI:3642344]
1093	ENSMUSG00000097877	0.602384	0.0283836	Gm26703	predicted gene, 26703 [Source:MGI Symbol;Acc:MGI:5477197]
1094	ENSMUSG00000096956	1.01269	0.0284273	Snhg18	small nucleolar RNA host gene 18 [Source:MGI Symbol;Acc:MGI:1914085]
1095	ENSMUSG00000054717	0.900256	0.0287457	Hmgb2	high mobility group box 2 [Source:MGI Symbol;Acc:MGI:96157]
1096	ENSMUSG00000033386	0.771769	0.0287457	Frrs1	ferric-chelate reductase 1 [Source:MGI Symbol;Acc:MGI:108076]
1097	ENSMUSG00000071001	1.34775	0.0287894	Hrct1	histidine rich carboxyl terminus 1 [Source:MGI Symbol;Acc:MGI:1917945]
1098	ENSMUSG00000004371	1.37458	0.028894	Il11	interleukin 11 [Source:MGI Symbol;Acc:MGI:107613]
1099	ENSMUSG00000031712	1.1336	0.0292474	Il15	interleukin 15 [Source:MGI Symbol;Acc:MGI:103014]
1100	ENSMUSG00000108053	1.36894	0.0295675	Gm43890	predicted gene, 43890 [Source:MGI Symbol;Acc:MGI:5690282]
1101	ENSMUSG00000083879	0.933847	0.02994	Gm14038	predicted gene 14038 [Source:MGI Symbol;Acc:MGI:3650657]
1102	ENSMUSG00000029134	1.00082	0.02994	Plb1	phospholipase B1 [Source:MGI Symbol;Acc:MGI:1922406]
1103	ENSMUSG00000108465	-0.955167	0.0302185	Gm45110	predicted gene 45110 [Source:MGI Symbol;Acc:MGI:5753686]
1104	ENSMUSG00000047143	0.641144	0.0302829	Dmrta2	doublesex and mab-3 related transcription factor like family A2 [Source:MGI Symbol;Acc:MGI:2653629]
1105	ENSMUSG00000039616	0.767838	0.03045	Mocos	molybdenum cofactor sulfurase [Source:MGI Symbol;Acc:MGI:1915841]
1106	ENSMUSG00000036875	0.786801	0.0305784	Dna2	DNA replication helicase/nuclease 2 [Source:MGI Symbol;Acc:MGI:2443732]
1107	ENSMUSG00000015966	0.697112	0.0306988	Il17rb	interleukin 17 receptor B [Source:MGI Symbol;Acc:MGI:1355292]
1108	ENSMUSG00000021367	0.915897	0.0308228	Edn1	endothelin 1 [Source:MGI Symbol;Acc:MGI:95283]
1109	ENSMUSG00000066632	-0.702977	0.0311498	Pgk1-rs7	phosphoglycerate kinase-1, related sequence-7 [Source:MGI Symbol;Acc:MGI:97562]
1110	ENSMUSG00000028494	0.684084	0.0312985	Plin2	perilipin 2 [Source:MGI Symbol;Acc:MGI:87920]
1111	ENSMUSG00000104212	1.12995	0.031371	Gm37986	predicted gene, 37986 [Source:MGI Symbol;Acc:MGI:5611214]
1112	ENSMUSG00000042567	-0.619497	0.0314551	Nek10	NIMA (never in mitosis gene a)- related kinase 10 [Source:MGI Symbol;Acc:MGI:2685128]
1113	ENSMUSG00000051486	-0.591401	0.0314703	Pcdhb11	protocadherin beta 11 [Source:MGI Symbol;Acc:MGI:2136746]
1114	ENSMUSG00000090223	-0.755614	0.0318163	Pcp4	Purkinje cell protein 4 [Source:MGI Symbol;Acc:MGI:97509]
1115	ENSMUSG00000048852	1.99245	0.0320327	Gm12185	predicted gene 12185 [Source:MGI Symbol;Acc:MGI:3652173]
1116	ENSMUSG00000031101	0.887437	0.0322501	Sash3	SAM and SH3 domain containing 3 [Source:MGI Symbol;Acc:MGI:1921381]
1117	ENSMUSG00000087253	1.91634	0.0323995	Gm12043	predicted gene 12043 [Source:MGI Symbol;Acc:MGI:3651843]
1118	ENSMUSG00000045679	0.591917	0.0326359	Pqlc3	PQ loop repeat containing [Source:MGI Symbol;Acc:MGI:2444067]
1119	ENSMUSG00000020140	-0.632982	0.0326462	Lgr5	leucine rich repeat containing G protein coupled receptor 5 [Source:MGI Symbol;Acc:MGI:1341817]
1120	ENSMUSG00000048001	-0.908433	0.0330378	Hes5	hes family bHLH transcription factor 5 [Source:MGI Symbol;Acc:MGI:104876]
1121	ENSMUSG00000008028	1.11124	0.0330808	1700008O03Rik	RIKEN cDNA 1700008O03 gene [Source:MGI Symbol;Acc:MGI:1916599]
1122	ENSMUSG00000075010	1.22092	0.0333248	AW112010	expressed sequence AW112010 [Source:MGI Symbol;Acc:MGI:2147706]
1123	ENSMUSG00000087543	0.909042	0.0339666	Gm16576	predicted gene 16576 [Source:MGI Symbol;Acc:MGI:4414996]
1124	ENSMUSG00000034427	1.48401	0.0339804	Myo15b	myosin XVB [Source:MGI Symbol;Acc:MGI:2685534]
1125	ENSMUSG00000112096	0.701079	0.0341467	A430103D13Rik	RIKEN cDNA A430103D13 gene [Source:MGI Symbol;Acc:MGI:1925025]
1126	ENSMUSG00000110396	-1.70501	0.0343354	Gm36737	predicted gene, 36737 [Source:MGI Symbol;Acc:MGI:5595896]
1127	ENSMUSG00000024371	1.00947	0.0343487	C2	complement component 2 (within H-2S) [Source:MGI Symbol;Acc:MGI:88226]
1128	ENSMUSG00000041859	0.769886	0.0344277	Mcm3	minichromosome maintenance complex component 3 [Source:MGI Symbol;Acc:MGI:101845]
1129	ENSMUSG00000044122	0.707381	0.0344306	Proca1	protein interacting with cyclin A1 [Source:MGI Symbol;Acc:MGI:1918274]
1130	ENSMUSG00000029607	0.964593	0.0344306	Ankrd61	ankyrin repeat domain 61 [Source:MGI Symbol;Acc:MGI:1913979]
1131	ENSMUSG00000042333	1.15086	0.0345339	Tnfrsf14	tumor necrosis factor receptor superfamily, member 14 (herpesvirus entry mediator) [Source:MGI Symbol;Acc:MGI:2675303]
1132	ENSMUSG00000085272	0.78369	0.0345636	Sbk3	SH3 domain binding kinase family, member 3 [Source:MGI Symbol;Acc:MGI:2685924]
1133	ENSMUSG00000040093	0.692562	0.0346723	Bmf	BCL2 modifying factor [Source:MGI Symbol;Acc:MGI:2176433]
1134	ENSMUSG00000086075	0.609824	0.0346723	Gm15728	predicted gene 15728 [Source:MGI Symbol;Acc:MGI:3783171]
1135	ENSMUSG00000085351	1.79699	0.0349655	Gm12472	predicted gene 12472 [Source:MGI Symbol;Acc:MGI:3649439]
1136	ENSMUSG00000106547	1.12149	0.0349965	B230303O12Rik	RIKEN cDNA B230303O12 gene [Source:MGI Symbol;Acc:MGI:2442644]
1137	ENSMUSG00000024526	0.798253	0.0351351	Cidea	cell death-inducing DNA fragmentation factor, alpha subunit-like effector A [Source:MGI Symbol;Acc:MGI:1270845]
1138	ENSMUSG00000027715	0.782924	0.0352359	Ccna2	cyclin A2 [Source:MGI Symbol;Acc:MGI:108069]
1139	ENSMUSG00000007833	0.67158	0.0352414	Aldh16a1	aldehyde dehydrogenase 16 family, member A1 [Source:MGI Symbol;Acc:MGI:1916998]
1140	ENSMUSG00000024087	0.685288	0.0352756	Cyp1b1	cytochrome P450, family 1, subfamily b, polypeptide 1 [Source:MGI Symbol;Acc:MGI:88590]
1141	ENSMUSG00000000693	0.620655	0.035718	Loxl3	lysyl oxidase-like 3 [Source:MGI Symbol;Acc:MGI:1337004]
1142	ENSMUSG00000047878	0.743131	0.0358474	A4galt	alpha 1,4-galactosyltransferase [Source:MGI Symbol;Acc:MGI:3512453]
1143	ENSMUSG00000041358	1.72177	0.0358765	Nutm1	NUT midline carcinoma, family member 1 [Source:MGI Symbol;Acc:MGI:2661384]
1144	ENSMUSG00000031077	0.671301	0.0361034	Fadd	Fas (TNFRSF6)-associated via death domain [Source:MGI Symbol;Acc:MGI:109324]
1145	ENSMUSG00000073491	4.45472	0.0362721	Ifi213	interferon activated gene 213 [Source:MGI Symbol;Acc:MGI:3695276]
1146	ENSMUSG00000117003	0.898918	0.0369471	CT010496.1	predicted gene, 49937 [Source:MGI Symbol;Acc:MGI:6270649]
1147	ENSMUSG00000034457	1.52667	0.0369517	Eda2r	ectodysplasin A2 receptor [Source:MGI Symbol;Acc:MGI:2442860]
1148	ENSMUSG00000070469	1.00948	0.0370775	Adamtsl3	ADAMTS-like 3 [Source:MGI Symbol;Acc:MGI:3028499]
1149	ENSMUSG00000097585	0.702492	0.0372237	E230029C05Rik	RIKEN cDNA E230029C05 gene [Source:MGI Symbol;Acc:MGI:2442580]
1150	ENSMUSG00000094152	0.914227	0.0372883	Slc6a16	solute carrier family 6, member 16 [Source:MGI Symbol;Acc:MGI:2685930]
1151	ENSMUSG00000090942	3.67443	0.0375186	F830016B08Rik	RIKEN cDNA F830016B08 gene [Source:MGI Symbol;Acc:MGI:3588218]
1152	ENSMUSG00000054626	1.39134	0.0380741	Xlr	X-linked lymphocyte-regulated [Source:MGI Symbol;Acc:MGI:98976]
1153	ENSMUSG00000036480	1.17043	0.0382307	Prss56	protease, serine 56 [Source:MGI Symbol;Acc:MGI:1916703]
1154	ENSMUSG00000069892	1.06226	0.038374	9930111J21Rik2	RIKEN cDNA 9930111J21 gene 2 [Source:MGI Symbol;Acc:MGI:3711310]
1155	ENSMUSG00000089726	1.03237	0.038397	Mir17hg	Mir17 host gene (non-protein coding) [Source:MGI Symbol;Acc:MGI:1923207]
1156	ENSMUSG00000039187	1.65758	0.0384831	Fanci	Fanconi anemia, complementation group I [Source:MGI Symbol;Acc:MGI:2384790]
1157	ENSMUSG00000083773	-0.655066	0.0385599	Gm13394	predicted gene 13394 [Source:MGI Symbol;Acc:MGI:3651848]
1158	ENSMUSG00000035551	-0.771516	0.0388453	Igfbpl1	insulin-like growth factor binding protein-like 1 [Source:MGI Symbol;Acc:MGI:1933198]
1159	ENSMUSG00000031849	1.32989	0.0388942	Comp	cartilage oligomeric matrix protein [Source:MGI Symbol;Acc:MGI:88469]
1160	ENSMUSG00000037868	1.03394	0.0389514	Egr2	early growth response 2 [Source:MGI Symbol;Acc:MGI:95296]
1161	ENSMUSG00000040987	0.650718	0.0391603	Mill2	MHC I like leukocyte 2 [Source:MGI Symbol;Acc:MGI:2179989]
1162	ENSMUSG00000074489	1.34197	0.0391717	Bglap3	bone gamma-carboxyglutamate protein 3 [Source:MGI Symbol;Acc:MGI:88155]
1163	ENSMUSG00000071256	0.588802	0.0397414	Zfp213	zinc finger protein 213 [Source:MGI Symbol;Acc:MGI:3053094]
1164	ENSMUSG00000032113	0.800768	0.0397892	Chek1	checkpoint kinase 1 [Source:MGI Symbol;Acc:MGI:1202065]
1165	ENSMUSG00000108325	-0.828102	0.0401014	Gm44898	predicted gene 44898 [Source:MGI Symbol;Acc:MGI:5753474]
1166	ENSMUSG00000082383	1.74412	0.0401014	Gm9670	predicted gene 9670 [Source:MGI Symbol;Acc:MGI:3780078]
1167	ENSMUSG00000093989	1.25696	0.040364	Rnasek	ribonuclease, RNase K [Source:MGI Symbol;Acc:MGI:106369]
1168	ENSMUSG00000082016	-0.663532	0.0410326	Pgam1-ps2	phosphoglycerate mutase 1, pseudogene 2 [Source:MGI Symbol;Acc:MGI:3645709]
1169	ENSMUSG00000108993	-1.31557	0.0414599	Gm44846	predicted gene 44846 [Source:MGI Symbol;Acc:MGI:5753422]
1170	ENSMUSG00000104761	-1.48911	0.0414907	Gm43511	predicted gene 43511 [Source:MGI Symbol;Acc:MGI:5663648]
1171	ENSMUSG00000060063	0.839213	0.0420951	Alox5ap	arachidonate 5-lipoxygenase activating protein [Source:MGI Symbol;Acc:MGI:107505]
1172	ENSMUSG00000110020	-0.823777	0.0420951	Gm45441	predicted gene 45441 [Source:MGI Symbol;Acc:MGI:5791277]
1173	ENSMUSG00000107108	1.60438	0.0428838	Gm9936	predicted gene 9936 [Source:MGI Symbol;Acc:MGI:3641854]
1174	ENSMUSG00000090610	-0.645168	0.0429707	Gm3571	predicted gene 3571 [Source:MGI Symbol;Acc:MGI:3781748]
1175	ENSMUSG00000053830	0.667179	0.0429707	Gm9923	predicted pseudogene 9923 [Source:MGI Symbol;Acc:MGI:3704365]
1176	ENSMUSG00000063354	0.926823	0.0430949	Slc39a4	solute carrier family 39 (zinc transporter), member 4 [Source:MGI Symbol;Acc:MGI:1919277]
1177	ENSMUSG00000028441	0.773751	0.0432247	1110017D15Rik	RIKEN cDNA 1110017D15 gene [Source:MGI Symbol;Acc:MGI:1920971]
1178	ENSMUSG00000027245	0.86645	0.0432915	Hypk	huntingtin interacting protein K [Source:MGI Symbol;Acc:MGI:1914943]
1179	ENSMUSG00000073154	-1.05707	0.0433711	9330158H04Rik	RIKEN cDNA 9330158H04 gene [Source:MGI Symbol;Acc:MGI:2442094]
1180	ENSMUSG00000023947	0.662465	0.0434746	Nfkbie	nuclear factor of kappa light polypeptide gene enhancer in B cells inhibitor, epsilon [Source:MGI Symbol;Acc:MGI:1194908]
1181	ENSMUSG00000027641	0.753763	0.0435895	Rbl1	RB transcriptional corepressor like 1 [Source:MGI Symbol;Acc:MGI:103300]
1182	ENSMUSG00000028702	1.06944	0.0437014	Rad54l	RAD54 like (S. cerevisiae) [Source:MGI Symbol;Acc:MGI:894697]
1183	ENSMUSG00000027315	0.888791	0.0437393	Spint1	serine protease inhibitor, Kunitz type 1 [Source:MGI Symbol;Acc:MGI:1338033]
1184	ENSMUSG00000005373	0.766894	0.043859	Mlxipl	MLX interacting protein-like [Source:MGI Symbol;Acc:MGI:1927999]
1185	ENSMUSG00000072844	0.740628	0.043859	G530011O06Rik	RIKEN cDNA G530011O06 gene [Source:MGI Symbol;Acc:MGI:3603513]
1186	ENSMUSG00000048065	1.54703	0.043859	Cyb5r2	cytochrome b5 reductase 2 [Source:MGI Symbol;Acc:MGI:2444415]
1187	ENSMUSG00000027939	1.05813	0.0439206	Nup210l	nucleoporin 210-like [Source:MGI Symbol;Acc:MGI:1924845]
1188	ENSMUSG00000085667	-0.704516	0.0439642	Gm12992	predicted gene 12992 [Source:MGI Symbol;Acc:MGI:3702644]
1189	ENSMUSG00000029163	0.700859	0.0439674	Emilin1	elastin microfibril interfacer 1 [Source:MGI Symbol;Acc:MGI:1926189]
1190	ENSMUSG00000025001	0.696676	0.0439738	Hells	helicase, lymphoid specific [Source:MGI Symbol;Acc:MGI:106209]
1191	ENSMUSG00000074281	1.23894	0.0440553	Gm12522	predicted gene 12522 [Source:MGI Symbol;Acc:MGI:3651334]
1192	ENSMUSG00000020573	0.70269	0.0443526	Pik3cg	phosphatidylinositol-4,5-bisphosphate 3-kinase catalytic subunit gamma [Source:MGI Symbol;Acc:MGI:1353576]
1193	ENSMUSG00000115100	1.2726	0.0444009	Gm34934	predicted gene, 34934 [Source:MGI Symbol;Acc:MGI:5594093]
1194	ENSMUSG00000090066	0.6225	0.0446035	1110002E22Rik	RIKEN cDNA 1110002E22 gene [Source:MGI Symbol;Acc:MGI:1915066]
1195	ENSMUSG00000033450	1.09929	0.0446969	Tagap	T cell activation Rho GTPase activating protein [Source:MGI Symbol;Acc:MGI:3615484]
1196	ENSMUSG00000032000	0.694702	0.0449147	Birc3	baculoviral IAP repeat-containing 3 [Source:MGI Symbol;Acc:MGI:1197007]
1197	ENSMUSG00000099964	-0.803549	0.0449147	Gm29514	predicted gene 29514 [Source:MGI Symbol;Acc:MGI:5580220]
1198	ENSMUSG00000107300	1.26988	0.0449147	Gm43279	predicted gene 43279 [Source:MGI Symbol;Acc:MGI:5663416]
1199	ENSMUSG00000036867	0.660176	0.044985	Smad6	SMAD family member 6 [Source:MGI Symbol;Acc:MGI:1336883]
1200	ENSMUSG00000067203	0.911927	0.044985	H2-K2	histocompatibility 2, K region locus 2 [Source:MGI Symbol;Acc:MGI:95906]
1201	ENSMUSG00000085307	1.40242	0.0451576	Gm11525	predicted gene 11525 [Source:MGI Symbol;Acc:MGI:3651809]
1202	ENSMUSG00000071537	1.40317	0.0452689	Klrg2	killer cell lectin-like receptor subfamily G, member 2 [Source:MGI Symbol;Acc:MGI:1921503]
1203	ENSMUSG00000027326	1.57462	0.0454834	Knl1	kinetochore scaffold 1 [Source:MGI Symbol;Acc:MGI:1923714]
1204	ENSMUSG00000090394	0.904383	0.0455786	4930523C07Rik	RIKEN cDNA 4930523C07 gene [Source:MGI Symbol;Acc:MGI:1914897]
1205	ENSMUSG00000024818	0.724915	0.0459601	Slc25a45	solute carrier family 25, member 45 [Source:MGI Symbol;Acc:MGI:2147731]
1206	ENSMUSG00000032122	0.763092	0.0461221	Slc37a2	solute carrier family 37 (glycerol-3-phosphate transporter), member 2 [Source:MGI Symbol;Acc:MGI:1929693]
1207	ENSMUSG00000042064	0.665331	0.0461655	Myo3b	myosin IIIB [Source:MGI Symbol;Acc:MGI:2448580]
1208	ENSMUSG00000023411	0.781804	0.0461864	Nfatc4	nuclear factor of activated T cells, cytoplasmic, calcineurin dependent 4 [Source:MGI Symbol;Acc:MGI:1920431]
1209	ENSMUSG00000091705	-0.942414	0.0462928	H2-Q2	histocompatibility 2, Q region locus 2 [Source:MGI Symbol;Acc:MGI:95931]
1210	ENSMUSG00000074466	0.8511	0.0465814	Gm15417	predicted gene 15417 [Source:MGI Symbol;Acc:MGI:3642531]
1211	ENSMUSG00000020143	1.1777	0.0467705	Dock2	dedicator of cyto-kinesis 2 [Source:MGI Symbol;Acc:MGI:2149010]
1212	ENSMUSG00000070687	-0.677989	0.0468479	Htr1d	5-hydroxytryptamine (serotonin) receptor 1D [Source:MGI Symbol;Acc:MGI:96276]
1213	ENSMUSG00000031586	0.596813	0.0475201	Rbpms	RNA binding protein gene with multiple splicing [Source:MGI Symbol;Acc:MGI:1334446]
1214	ENSMUSG00000086697	0.755286	0.0475744	4933427G23Rik	RIKEN cDNA 4933427G23 gene [Source:MGI Symbol;Acc:MGI:3036235]
1215	ENSMUSG00000107877	0.610715	0.048352	Gm43951	RIKEN cDNA 4933427D14 gene [Source:MGI Symbol;Acc:MGI:1921727]
1216	ENSMUSG00000097145	0.823257	0.04848	9230114K14Rik	RIKEN cDNA 9230114K14 gene [Source:MGI Symbol;Acc:MGI:3041212]
1217	ENSMUSG00000046761	0.606679	0.0488963	Fam83h	family with sequence similarity 83, member H [Source:MGI Symbol;Acc:MGI:2145900]
1218	ENSMUSG00000042349	0.648037	0.0489872	Ikbke	inhibitor of kappaB kinase epsilon [Source:MGI Symbol;Acc:MGI:1929612]
1219	ENSMUSG00000055809	0.818419	0.0490328	Dnaaf3	dynein, axonemal assembly factor 3 [Source:MGI Symbol;Acc:MGI:3588207]
1220	ENSMUSG00000028970	0.806116	0.0492407	Abcb1b	ATP-binding cassette, sub-family B (MDR/TAP), member 1B [Source:MGI Symbol;Acc:MGI:97568]
1221	ENSMUSG00000116766	-0.885877	0.0496706	AC171205.1	predicted gene, 49702 [Source:MGI Symbol;Acc:MGI:6215162]
1222	ENSMUSG00000029755	-0.639422	0.0498205	Dlx5	distal-less homeobox 5 [Source:MGI Symbol;Acc:MGI:101926]

## Sheet: P75_Ca_ISR
Gene ID	log2FoldChange	padj	Gene Name	Gene description
ENSMUSG00000020303	2.53603	3.72768e-44	Stc2	stanniocalcin 2 [Source:MGI Symbol;Acc:MGI:1316731]
ENSMUSG00000028893	2.16557	4.67558e-42	Sesn2	sestrin 2 [Source:MGI Symbol;Acc:MGI:2651874]
ENSMUSG00000025408	1.7934	8.12729e-41	Ddit3	DNA-damage inducible transcript 3 [Source:MGI Symbol;Acc:MGI:109247]
ENSMUSG00000026456	1.51524	8.53449e-40	Cyb5r1	cytochrome b5 reductase 1 [Source:MGI Symbol;Acc:MGI:1919267]
ENSMUSG00000025403	1.53242	5.36867e-38	Shmt2	serine hydroxymethyltransferase 2 (mitochondrial) [Source:MGI Symbol;Acc:MGI:1277989]
ENSMUSG00000031297	1.37778	2.65427e-36	Slc7a3	solute carrier family 7 (cationic amino acid transporter, y+ system), member 3 [Source:MGI Symbol;Acc:MGI:1100521]
ENSMUSG00000027313	1.98845	1.6812e-35	Chac1	ChaC, cation transport regulator 1 [Source:MGI Symbol;Acc:MGI:1916315]
ENSMUSG00000002083	1.85971	7.42687e-31	Bbc3	BCL2 binding component 3 [Source:MGI Symbol;Acc:MGI:2181667]
ENSMUSG00000002325	2.18577	8.06997e-30	Irf9	interferon regulatory factor 9 [Source:MGI Symbol;Acc:MGI:107587]
ENSMUSG00000031960	0.767767	1.12295e-28	Aars	alanyl-tRNA synthetase [Source:MGI Symbol;Acc:MGI:2384560]
ENSMUSG00000016496	3.05623	1.13322e-27	Cd274	CD274 antigen [Source:MGI Symbol;Acc:MGI:1926446]
ENSMUSG00000024587	0.72173	1.8752e-25	Nars	asparaginyl-tRNA synthetase [Source:MGI Symbol;Acc:MGI:1917473]
ENSMUSG00000060519	2.09977	8.46535e-24	Tor3a	torsin family 3, member A [Source:MGI Symbol;Acc:MGI:1353652]
ENSMUSG00000028811	0.747788	2.2486e-22	Yars	tyrosyl-tRNA synthetase [Source:MGI Symbol;Acc:MGI:2147627]
ENSMUSG00000068739	0.662517	5.33363e-22	Sars	seryl-aminoacyl-tRNA synthetase [Source:MGI Symbol;Acc:MGI:102809]
ENSMUSG00000005667	1.37065	1.47774e-20	Mthfd2	methylenetetrahydrofolate dehydrogenase (NAD+ dependent), methenyltetrahydrofolate cyclohydrolase [Source:MGI Symbol;Acc:MGI:1338850]
ENSMUSG00000024521	2.59627	2.18534e-20	Pmaip1	phorbol-12-myristate-13-acetate-induced protein 1 [Source:MGI Symbol;Acc:MGI:1930146]
ENSMUSG00000010095	0.716154	1.17169e-19	Slc3a2	solute carrier family 3 (activators of dibasic and neutral amino acid transport), member 2 [Source:MGI Symbol;Acc:MGI:96955]
ENSMUSG00000032715	2.64766	1.72667e-18	Trib3	tribbles pseudokinase 3 [Source:MGI Symbol;Acc:MGI:1345675]
ENSMUSG00000086290	1.29085	2.65965e-18	Snhg12	small nucleolar RNA host gene 12 [Source:MGI Symbol;Acc:MGI:1916721]
ENSMUSG00000033355	3.63861	3.80396e-18	Rtp4	receptor transporter protein 4 [Source:MGI Symbol;Acc:MGI:1915025]
ENSMUSG00000031490	1.92207	4.30942e-18	Eif4ebp1	eukaryotic translation initiation factor 4E binding protein 1 [Source:MGI Symbol;Acc:MGI:103267]
ENSMUSG00000023067	1.41164	5.31109e-18	Cdkn1a	cyclin-dependent kinase inhibitor 1A (P21) [Source:MGI Symbol;Acc:MGI:104556]
ENSMUSG00000024359	0.542296	7.86047e-18	Hspa9	heat shock protein 9 [Source:MGI Symbol;Acc:MGI:96245]
ENSMUSG00000040010	0.856382	1.27153e-17	Slc7a5	solute carrier family 7 (cationic amino acid transporter, y+ system), member 5 [Source:MGI Symbol;Acc:MGI:1298205]
ENSMUSG00000029826	1.87665	3.88039e-17	Zc3hav1	zinc finger CCCH type, antiviral 1 [Source:MGI Symbol;Acc:MGI:1926031]
ENSMUSG00000015312	1.1185	5.75991e-16	Gadd45b	growth arrest and DNA-damage-inducible 45 beta [Source:MGI Symbol;Acc:MGI:107776]
ENSMUSG00000027580	1.35035	7.72068e-16	Helz2	helicase with zinc finger 2, transcriptional coactivator [Source:MGI Symbol;Acc:MGI:2385169]
ENSMUSG00000073489	4.38767	1.63861e-15	Ifi204	interferon activated gene 204 [Source:MGI Symbol;Acc:MGI:96429]
ENSMUSG00000034855	6.06177	1.8081e-15	Cxcl10	chemokine (C-X-C motif) ligand 10 [Source:MGI Symbol;Acc:MGI:1352450]
ENSMUSG00000069874	1.96243	6.47607e-15	Irgm2	immunity-related GTPase family M member 2 [Source:MGI Symbol;Acc:MGI:1926262]
ENSMUSG00000031026	0.728275	1.03118e-14	Trim66	tripartite motif-containing 66 [Source:MGI Symbol;Acc:MGI:2152406]
ENSMUSG00000023341	3.78142	4.92804e-14	Mx2	MX dynamin-like GTPase 2 [Source:MGI Symbol;Acc:MGI:97244]
ENSMUSG00000030609	1.1815	7.36088e-14	Aen	apoptosis enhancing nuclease [Source:MGI Symbol;Acc:MGI:1915298]
ENSMUSG00000056501	1.30713	8.21056e-14	Cebpb	CCAAT/enhancer binding protein (C/EBP), beta [Source:MGI Symbol;Acc:MGI:88373]
ENSMUSG00000041313	0.749949	2.54958e-13	Slc7a1	solute carrier family 7 (cationic amino acid transporter, y+ system), member 1 [Source:MGI Symbol;Acc:MGI:88117]
ENSMUSG00000010755	0.624511	3.05071e-13	Cars	cysteinyl-tRNA synthetase [Source:MGI Symbol;Acc:MGI:1351477]
ENSMUSG00000038539	1.14822	3.54107e-13	Atf5	activating transcription factor 5 [Source:MGI Symbol;Acc:MGI:2141857]
ENSMUSG00000040354	0.6827	1.22893e-12	Mars	methionine-tRNA synthetase 1 [Source:MGI Symbol;Acc:MGI:1345633]
ENSMUSG00000038550	0.966237	7.07679e-12	Ciart	circadian associated repressor of transcription [Source:MGI Symbol;Acc:MGI:2684975]
ENSMUSG00000029752	0.63905	7.70294e-12	Asns	asparagine synthetase [Source:MGI Symbol;Acc:MGI:1350929]
ENSMUSG00000020142	0.677597	8.96428e-12	Slc1a4	solute carrier family 1 (glutamate/neutral amino acid transporter), member 4 [Source:MGI Symbol;Acc:MGI:2135601]
ENSMUSG00000092274	0.955415	2.09019e-11	Neat1	nuclear paraspeckle assembly transcript 1 (non-protein coding) [Source:MGI Symbol;Acc:MGI:1914211]
ENSMUSG00000085156	1.71694	2.20461e-11	Snhg15	small nucleolar RNA host gene 15 [Source:MGI Symbol;Acc:MGI:3650059]
ENSMUSG00000020256	1.25436	4.21535e-11	Aldh1l2	aldehyde dehydrogenase 1 family, member L2 [Source:MGI Symbol;Acc:MGI:2444680]
ENSMUSG00000007029	0.618033	4.22092e-11	Vars	valyl-tRNA synthetase [Source:MGI Symbol;Acc:MGI:90675]
ENSMUSG00000073411	2.31656	5.596e-11	H2-D1	histocompatibility 2, D region locus 1 [Source:MGI Symbol;Acc:MGI:95896]
ENSMUSG00000033909	0.610379	7.57118e-11	Usp36	ubiquitin specific peptidase 36 [Source:MGI Symbol;Acc:MGI:1919594]
ENSMUSG00000037851	0.642024	1.02844e-10	Iars	isoleucine-tRNA synthetase [Source:MGI Symbol;Acc:MGI:2145219]
ENSMUSG00000022241	0.687879	1.088e-10	Tars	threonyl-tRNA synthetase [Source:MGI Symbol;Acc:MGI:106314]
ENSMUSG00000021668	1.07797	1.12517e-10	Polk	polymerase (DNA directed), kappa [Source:MGI Symbol;Acc:MGI:1349767]
ENSMUSG00000030738	0.568606	1.20458e-10	Eif3c	eukaryotic translation initiation factor 3, subunit C [Source:MGI Symbol;Acc:MGI:1926966]
ENSMUSG00000025007	0.653022	1.68711e-10	Aldh18a1	aldehyde dehydrogenase 18 family, member A1 [Source:MGI Symbol;Acc:MGI:1888908]
ENSMUSG00000038742	1.33194	1.82874e-10	Angptl6	angiopoietin-like 6 [Source:MGI Symbol;Acc:MGI:1917976]
ENSMUSG00000029446	0.884331	1.96264e-10	Psph	phosphoserine phosphatase [Source:MGI Symbol;Acc:MGI:97788]
ENSMUSG00000005413	1.52108	4.63097e-10	Hmox1	heme oxygenase 1 [Source:MGI Symbol;Acc:MGI:96163]
ENSMUSG00000023883	0.595898	5.8079e-10	Phf10	PHD finger protein 10 [Source:MGI Symbol;Acc:MGI:1919307]
ENSMUSG00000042406	0.54179	1.23675e-09	Atf4	activating transcription factor 4 [Source:MGI Symbol;Acc:MGI:88096]
ENSMUSG00000056144	2.04087	2.04021e-09	Trim34a	tripartite motif-containing 34A [Source:MGI Symbol;Acc:MGI:2137359]
ENSMUSG00000026536	6.15542	4.13941e-09	Ifi211	interferon activated gene 211 [Source:MGI Symbol;Acc:MGI:3041120]
ENSMUSG00000029777	0.516104	7.02898e-09	Gars	glycyl-tRNA synthetase [Source:MGI Symbol;Acc:MGI:2449057]
ENSMUSG00000025140	1.46806	1.35821e-08	Pycr1	pyrroline-5-carboxylate reductase 1 [Source:MGI Symbol;Acc:MGI:2384795]
ENSMUSG00000040174	0.904543	2.59896e-08	Alkbh3	alkB homolog 3, alpha-ketoglutarate-dependent dioxygenase [Source:MGI Symbol;Acc:MGI:1916363]
ENSMUSG00000025225	1.2361	3.05868e-08	Nfkb2	nuclear factor of kappa light polypeptide gene enhancer in B cells 2, p49/p100 [Source:MGI Symbol;Acc:MGI:1099800]
ENSMUSG00000041827	6.3393	5.53342e-08	Oasl1	2'-5' oligoadenylate synthetase-like 1 [Source:MGI Symbol;Acc:MGI:2180849]
ENSMUSG00000040435	0.955622	9.79562e-08	Ppp1r15a	protein phosphatase 1, regulatory subunit 15A [Source:MGI Symbol;Acc:MGI:1927072]
ENSMUSG00000039158	1.04881	9.90101e-08	Akna	AT-hook transcription factor [Source:MGI Symbol;Acc:MGI:2140340]
ENSMUSG00000002983	1.09113	1.06938e-07	Relb	avian reticuloendotheliosis viral (v-rel) oncogene related B [Source:MGI Symbol;Acc:MGI:103289]
ENSMUSG00000034636	-0.596934	1.71536e-07	Zyg11b	zyg-ll family member B, cell cycle regulator [Source:MGI Symbol;Acc:MGI:2685277]
ENSMUSG00000041168	0.483557	2.41963e-07	Lonp1	lon peptidase 1, mitochondrial [Source:MGI Symbol;Acc:MGI:1921392]
ENSMUSG00000025591	1.02793	2.46749e-07	Tma16	translation machinery associated 16 [Source:MGI Symbol;Acc:MGI:1913532]
ENSMUSG00000020075	0.572889	3.33519e-07	Ddx21	DExD box helicase 21 [Source:MGI Symbol;Acc:MGI:1860494]
ENSMUSG00000020038	0.678209	4.21727e-07	Cry1	cryptochrome 1 (photolyase-like) [Source:MGI Symbol;Acc:MGI:1270841]
ENSMUSG00000026615	0.559906	5.60495e-07	Eprs	glutamyl-prolyl-tRNA synthetase [Source:MGI Symbol;Acc:MGI:97838]
ENSMUSG00000003469	-0.615355	5.98094e-07	Phyhip	phytanoyl-CoA hydroxylase interacting protein [Source:MGI Symbol;Acc:MGI:1860417]
ENSMUSG00000038235	1.01023	6.31066e-07	F11r	F11 receptor [Source:MGI Symbol;Acc:MGI:1321398]
ENSMUSG00000047407	1.97946	6.31066e-07	Tgif1	TGFB-induced factor homeobox 1 [Source:MGI Symbol;Acc:MGI:1194497]
ENSMUSG00000042354	0.586046	9.15565e-07	Gnl3	guanine nucleotide binding protein-like 3 (nucleolar) [Source:MGI Symbol;Acc:MGI:1353651]
ENSMUSG00000034667	0.505217	9.26209e-07	Xpot	exportin, tRNA (nuclear export receptor for tRNAs) [Source:MGI Symbol;Acc:MGI:1920442]
ENSMUSG00000020423	0.94896	1.14052e-06	Btg2	BTG anti-proliferation factor 2 [Source:MGI Symbol;Acc:MGI:108384]
ENSMUSG00000036057	0.429754	1.4945e-06	Ptpn23	protein tyrosine phosphatase, non-receptor type 23 [Source:MGI Symbol;Acc:MGI:2144837]
ENSMUSG00000053560	0.930439	2.20653e-06	Ier2	immediate early response 2 [Source:MGI Symbol;Acc:MGI:104815]
ENSMUSG00000078671	0.47268	2.41746e-06	Chd2	chromodomain helicase DNA binding protein 2 [Source:MGI Symbol;Acc:MGI:2448567]
ENSMUSG00000024493	0.502948	2.41746e-06	Lars	leucyl-tRNA synthetase [Source:MGI Symbol;Acc:MGI:1913808]
ENSMUSG00000039997	1.61517	2.42029e-06	Ifi203	interferon activated gene 203 [Source:MGI Symbol;Acc:MGI:96428]
ENSMUSG00000057101	0.44513	2.51713e-06	Zfp180	zinc finger protein 180 [Source:MGI Symbol;Acc:MGI:1923701]
ENSMUSG00000022858	0.486048	3.32921e-06	Tra2b	transformer 2 beta [Source:MGI Symbol;Acc:MGI:106016]
ENSMUSG00000030785	0.881734	3.43722e-06	Cox6a2	cytochrome c oxidase subunit 6A2 [Source:MGI Symbol;Acc:MGI:104649]
ENSMUSG00000020184	0.741958	4.04559e-06	Mdm2	transformed mouse 3T3 cell double minute 2 [Source:MGI Symbol;Acc:MGI:96952]
ENSMUSG00000045917	0.553878	4.09412e-06	Tmem268	transmembrane protein 268 [Source:MGI Symbol;Acc:MGI:1913920]
ENSMUSG00000062098	-0.485643	4.14014e-06	Btbd3	BTB (POZ) domain containing 3 [Source:MGI Symbol;Acc:MGI:2385155]
ENSMUSG00000034154	0.542471	4.33573e-06	Ino80	INO80 complex subunit [Source:MGI Symbol;Acc:MGI:1915392]
ENSMUSG00000054648	0.554513	5.04655e-06	Zfp869	zinc finger protein 869 [Source:MGI Symbol;Acc:MGI:1914119]
ENSMUSG00000021701	0.412696	5.87028e-06	Plk2	polo like kinase 2 [Source:MGI Symbol;Acc:MGI:1099790]
ENSMUSG00000040945	0.421191	7.52473e-06	Rcc2	regulator of chromosome condensation 2 [Source:MGI Symbol;Acc:MGI:1919784]
ENSMUSG00000036882	-0.521191	7.69597e-06	Arhgap33	Rho GTPase activating protein 33 [Source:MGI Symbol;Acc:MGI:2673998]
ENSMUSG00000029771	1.14965	7.72107e-06	Irf5	interferon regulatory factor 5 [Source:MGI Symbol;Acc:MGI:1350924]
ENSMUSG00000031770	0.566482	8.02111e-06	Herpud1	homocysteine-inducible, endoplasmic reticulum stress-inducible, ubiquitin-like domain member 1 [Source:MGI Symbol;Acc:MGI:1927406]
ENSMUSG00000026628	2.61821	8.30828e-06	Atf3	activating transcription factor 3 [Source:MGI Symbol;Acc:MGI:109384]
ENSMUSG00000042608	0.634519	8.30828e-06	Stk40	serine/threonine kinase 40 [Source:MGI Symbol;Acc:MGI:1921428]
ENSMUSG00000037447	0.706971	8.90912e-06	Arid5a	AT rich interactive domain 5A (MRF1-like) [Source:MGI Symbol;Acc:MGI:2443039]
ENSMUSG00000061451	-0.348983	8.9289e-06	Tmem151a	transmembrane protein 151A [Source:MGI Symbol;Acc:MGI:2147713]
ENSMUSG00000053398	0.444142	1.02711e-05	Phgdh	3-phosphoglycerate dehydrogenase [Source:MGI Symbol;Acc:MGI:1355330]
ENSMUSG00000058638	0.666254	1.28838e-05	Zfp110	zinc finger protein 110 [Source:MGI Symbol;Acc:MGI:1890378]
ENSMUSG00000016559	0.551369	1.54234e-05	H3f3b	H3.3 histone B [Source:MGI Symbol;Acc:MGI:1101768]
ENSMUSG00000021057	-0.692804	1.54271e-05	Akap5	A kinase (PRKA) anchor protein 5 [Source:MGI Symbol;Acc:MGI:2685104]
ENSMUSG00000027995	2.87674	1.56627e-05	Tlr2	toll-like receptor 2 [Source:MGI Symbol;Acc:MGI:1346060]
ENSMUSG00000075040	0.732201	1.71555e-05	Zfp408	zinc finger protein 408 [Source:MGI Symbol;Acc:MGI:2685857]
ENSMUSG00000031513	0.383977	1.86027e-05	Leprotl1	leptin receptor overlapping transcript-like 1 [Source:MGI Symbol;Acc:MGI:1915442]
ENSMUSG00000086841	1.07957	1.91029e-05	2410006H16Rik	RIKEN cDNA 2410006H16 gene [Source:MGI Symbol;Acc:MGI:1916471]
ENSMUSG00000028542	0.454688	2.04346e-05	Slc6a9	solute carrier family 6 (neurotransmitter transporter, glycine), member 9 [Source:MGI Symbol;Acc:MGI:95760]
ENSMUSG00000028889	0.562146	2.085e-05	Yrdc	yrdC domain containing (E.coli) [Source:MGI Symbol;Acc:MGI:2387201]
ENSMUSG00000064145	0.459725	2.58333e-05	Arih2	ariadne RBR E3 ubiquitin protein ligase 2 [Source:MGI Symbol;Acc:MGI:1344361]
ENSMUSG00000018476	0.516088	2.62889e-05	Kdm6b	KDM1 lysine (K)-specific demethylase 6B [Source:MGI Symbol;Acc:MGI:2448492]
ENSMUSG00000068699	1.42143	3.47923e-05	Flnc	filamin C, gamma [Source:MGI Symbol;Acc:MGI:95557]
ENSMUSG00000047098	0.508997	3.51208e-05	Rnf31	ring finger protein 31 [Source:MGI Symbol;Acc:MGI:1934704]
ENSMUSG00000057554	0.547911	3.54061e-05	Lgals8	lectin, galactose binding, soluble 8 [Source:MGI Symbol;Acc:MGI:1928481]
ENSMUSG00000040613	1.49944	3.7911e-05	Apobec1	apolipoprotein B mRNA editing enzyme, catalytic polypeptide 1 [Source:MGI Symbol;Acc:MGI:103298]
ENSMUSG00000027122	0.443	3.81656e-05	Arl14ep	ADP-ribosylation factor-like 14 effector protein [Source:MGI Symbol;Acc:MGI:1926020]
ENSMUSG00000052253	0.482088	3.91649e-05	Zfp622	zinc finger protein 622 [Source:MGI Symbol;Acc:MGI:1289282]
ENSMUSG00000024912	0.697593	4.23017e-05	Fosl1	fos-like antigen 1 [Source:MGI Symbol;Acc:MGI:107179]
ENSMUSG00000022964	-0.31339	4.24176e-05	Tmem50b	transmembrane protein 50B [Source:MGI Symbol;Acc:MGI:1925225]
ENSMUSG00000025366	0.546352	5.30233e-05	Esyt1	extended synaptotagmin-like protein 1 [Source:MGI Symbol;Acc:MGI:1344426]
ENSMUSG00000045180	-0.462446	5.35965e-05	Shroom2	shroom family member 2 [Source:MGI Symbol;Acc:MGI:107194]
ENSMUSG00000030717	0.946054	5.37409e-05	Nupr1	nuclear protein transcription regulator 1 [Source:MGI Symbol;Acc:MGI:1891834]
ENSMUSG00000090272	1.50066	5.79907e-05	Mndal	myeloid nuclear differentiation antigen like [Source:MGI Symbol;Acc:MGI:3780953]
ENSMUSG00000030499	0.601593	5.80346e-05	Kctd15	potassium channel tetramerisation domain containing 15 [Source:MGI Symbol;Acc:MGI:2385276]
ENSMUSG00000007594	-0.341551	6.37516e-05	Hapln4	hyaluronan and proteoglycan link protein 4 [Source:MGI Symbol;Acc:MGI:2679531]
ENSMUSG00000047963	1.52974	6.94027e-05	Stbd1	starch binding domain 1 [Source:MGI Symbol;Acc:MGI:1261768]
ENSMUSG00000042726	0.391436	7.50547e-05	Trafd1	TRAF type zinc finger domain containing 1 [Source:MGI Symbol;Acc:MGI:1923551]
ENSMUSG00000038508	4.31149	8.26947e-05	Gdf15	growth differentiation factor 15 [Source:MGI Symbol;Acc:MGI:1346047]
ENSMUSG00000020534	1.08549	8.75211e-05	Shmt1	serine hydroxymethyltransferase 1 (soluble) [Source:MGI Symbol;Acc:MGI:98299]
ENSMUSG00000021281	1.14463	8.81085e-05	Tnfaip2	tumor necrosis factor, alpha-induced protein 2 [Source:MGI Symbol;Acc:MGI:104960]
ENSMUSG00000026483	0.999392	9.5946e-05	Fam129a	niban apoptosis regulator 1 [Source:MGI Symbol;Acc:MGI:2137237]
ENSMUSG00000024335	0.276821	9.925e-05	Brd2	bromodomain containing 2 [Source:MGI Symbol;Acc:MGI:99495]
ENSMUSG00000029397	0.438224	0.000103762	Rchy1	ring finger and CHY zinc finger domain containing 1 [Source:MGI Symbol;Acc:MGI:1915348]
ENSMUSG00000024330	0.660179	0.000106567	Col11a2	collagen, type XI, alpha 2 [Source:MGI Symbol;Acc:MGI:88447]
ENSMUSG00000025220	0.415548	0.000107147	Mgea5	O-GlcNAcase [Source:MGI Symbol;Acc:MGI:1932139]
ENSMUSG00000025316	-0.44894	0.000111829	Banp	BTG3 associated nuclear protein [Source:MGI Symbol;Acc:MGI:1889023]
ENSMUSG00000017493	-0.417546	0.000126775	Igfbp4	insulin-like growth factor binding protein 4 [Source:MGI Symbol;Acc:MGI:96439]
ENSMUSG00000059552	0.554647	0.000126775	Trp53	transformation related protein 53 [Source:MGI Symbol;Acc:MGI:98834]
ENSMUSG00000000628	0.979404	0.000129741	Hk2	hexokinase 2 [Source:MGI Symbol;Acc:MGI:1315197]
ENSMUSG00000033707	-0.537094	0.000138805	Lrrc24	leucine rich repeat containing 24 [Source:MGI Symbol;Acc:MGI:3605040]
ENSMUSG00000033538	2.50813	0.000145212	Casp4	caspase 4, apoptosis-related cysteine peptidase [Source:MGI Symbol;Acc:MGI:107700]
ENSMUSG00000042010	0.749375	0.000154046	Acacb	acetyl-Coenzyme A carboxylase beta [Source:MGI Symbol;Acc:MGI:2140940]
ENSMUSG00000026755	0.344074	0.000154241	Arpc5l	actin related protein 2/3 complex, subunit 5-like [Source:MGI Symbol;Acc:MGI:1921442]
ENSMUSG00000024457	0.488592	0.000161851	Trim26	tripartite motif-containing 26 [Source:MGI Symbol;Acc:MGI:1337056]
ENSMUSG00000006418	0.457744	0.00019603	Rnf114	ring finger protein 114 [Source:MGI Symbol;Acc:MGI:1933159]
ENSMUSG00000020941	0.678192	0.000202631	Map3k14	mitogen-activated protein kinase kinase kinase 14 [Source:MGI Symbol;Acc:MGI:1858204]
ENSMUSG00000036693	0.514824	0.000203534	Nop14	NOP14 nucleolar protein [Source:MGI Symbol;Acc:MGI:1922666]
ENSMUSG00000026822	3.49934	0.000212879	Lcn2	lipocalin 2 [Source:MGI Symbol;Acc:MGI:96757]
ENSMUSG00000097039	0.80635	0.000214606	Pvt1	Pvt1 oncogene [Source:MGI Symbol;Acc:MGI:97824]
ENSMUSG00000022952	1.59696	0.000223176	Runx1	runt related transcription factor 1 [Source:MGI Symbol;Acc:MGI:99852]
ENSMUSG00000037344	0.456922	0.000234151	Slc12a9	solute carrier family 12 (potassium/chloride transporters), member 9 [Source:MGI Symbol;Acc:MGI:1933532]
ENSMUSG00000036712	-0.304776	0.000239252	Cyld	CYLD lysine 63 deubiquitinase [Source:MGI Symbol;Acc:MGI:1921506]
ENSMUSG00000040414	0.517439	0.000243642	Slc25a28	solute carrier family 25, member 28 [Source:MGI Symbol;Acc:MGI:2180509]
ENSMUSG00000062380	-0.465644	0.000248783	Tubb3	tubulin, beta 3 class III [Source:MGI Symbol;Acc:MGI:107813]
ENSMUSG00000032936	-0.463577	0.000259398	Camkv	CaM kinase-like vesicle-associated [Source:MGI Symbol;Acc:MGI:2384296]
ENSMUSG00000053332	0.385745	0.000273685	Gas5	growth arrest specific 5 [Source:MGI Symbol;Acc:MGI:95659]
ENSMUSG00000024037	0.448718	0.000280045	Wdr4	WD repeat domain 4 [Source:MGI Symbol;Acc:MGI:1889002]
ENSMUSG00000054728	-0.439937	0.000287512	Phactr1	phosphatase and actin regulator 1 [Source:MGI Symbol;Acc:MGI:2659021]
ENSMUSG00000037185	-1.70686	0.000325788	Krt80	keratin 80 [Source:MGI Symbol;Acc:MGI:1921377]
ENSMUSG00000040618	0.481103	0.000382824	Pck2	phosphoenolpyruvate carboxykinase 2 (mitochondrial) [Source:MGI Symbol;Acc:MGI:1860456]
ENSMUSG00000031284	-0.410075	0.000401955	Pak3	p21 (RAC1) activated kinase 3 [Source:MGI Symbol;Acc:MGI:1339656]
ENSMUSG00000041147	0.59135	0.000405894	Brca2	breast cancer 2, early onset [Source:MGI Symbol;Acc:MGI:109337]
ENSMUSG00000026048	0.442609	0.000412434	Ercc5	excision repair cross-complementing rodent repair deficiency, complementation group 5 [Source:MGI Symbol;Acc:MGI:103582]
ENSMUSG00000032637	0.275013	0.000417427	Atxn2l	ataxin 2-like [Source:MGI Symbol;Acc:MGI:2446242]
ENSMUSG00000039474	-0.360183	0.000429134	Wfs1	wolframin ER transmembrane glycoprotein [Source:MGI Symbol;Acc:MGI:1328355]
ENSMUSG00000025730	0.362031	0.000462117	Rab40c	Rab40C, member RAS oncogene family [Source:MGI Symbol;Acc:MGI:2183454]
ENSMUSG00000043284	0.48323	0.000514728	Tmem11	transmembrane protein 11 [Source:MGI Symbol;Acc:MGI:2144726]
ENSMUSG00000020691	0.553747	0.000525158	Mettl2	methyltransferase like 2 [Source:MGI Symbol;Acc:MGI:1289171]
ENSMUSG00000030641	2.18387	0.000547018	Ddias	DNA damage-induced apoptosis suppressor [Source:MGI Symbol;Acc:MGI:1921291]
ENSMUSG00000000384	0.477802	0.000551789	Tbrg4	transforming growth factor beta regulated gene 4 [Source:MGI Symbol;Acc:MGI:1100868]
ENSMUSG00000029513	0.561377	0.000574906	Prkab1	protein kinase, AMP-activated, beta 1 non-catalytic subunit [Source:MGI Symbol;Acc:MGI:1336167]
ENSMUSG00000020472	0.63166	0.000674243	Zkscan17	zinc finger with KRAB and SCAN domains 17 [Source:MGI Symbol;Acc:MGI:2679270]
ENSMUSG00000022364	0.619154	0.000741182	Tbc1d31	TBC1 domain family, member 31 [Source:MGI Symbol;Acc:MGI:2684931]
ENSMUSG00000067889	-0.474508	0.000775814	Sptbn2	spectrin beta, non-erythrocytic 2 [Source:MGI Symbol;Acc:MGI:1313261]
ENSMUSG00000035649	-0.356724	0.0008232	Zcchc7	zinc finger, CCHC domain containing 7 [Source:MGI Symbol;Acc:MGI:2442912]
ENSMUSG00000097785	0.665413	0.000862354	B230217O12Rik	RIKEN cDNA B230217O12 gene [Source:MGI Symbol;Acc:MGI:2444948]
ENSMUSG00000028708	0.417445	0.000879985	Mknk1	MAP kinase-interacting serine/threonine kinase 1 [Source:MGI Symbol;Acc:MGI:894316]
ENSMUSG00000030421	0.382638	0.000936109	Uri1	URI1, prefoldin-like chaperone [Source:MGI Symbol;Acc:MGI:1342294]
ENSMUSG00000027722	0.496151	0.000948263	Spata5	spermatogenesis associated 5 [Source:MGI Symbol;Acc:MGI:1927170]
ENSMUSG00000026864	-0.252907	0.000960236	Hspa5	heat shock protein 5 [Source:MGI Symbol;Acc:MGI:95835]
ENSMUSG00000028850	0.727509	0.00103238	Gpatch3	G patch domain containing 3 [Source:MGI Symbol;Acc:MGI:2442492]
ENSMUSG00000044244	2.12538	0.00112669	Il20rb	interleukin 20 receptor beta [Source:MGI Symbol;Acc:MGI:2143266]
ENSMUSG00000024841	0.424679	0.00115351	Eif1ad	eukaryotic translation initiation factor 1A domain containing [Source:MGI Symbol;Acc:MGI:1917110]
ENSMUSG00000032192	-0.345668	0.00123065	Gnb5	guanine nucleotide binding protein (G protein), beta 5 [Source:MGI Symbol;Acc:MGI:101848]
ENSMUSG00000069114	0.514147	0.00129852	Zbtb10	zinc finger and BTB domain containing 10 [Source:MGI Symbol;Acc:MGI:2139883]
ENSMUSG00000047084	0.355239	0.00135773	Ngrn	neugrin, neurite outgrowth associated [Source:MGI Symbol;Acc:MGI:1933212]
ENSMUSG00000052488	0.385246	0.00140122	Cherp	calcium homeostasis endoplasmic reticulum protein [Source:MGI Symbol;Acc:MGI:106417]
ENSMUSG00000031387	1.04961	0.00152005	Renbp	renin binding protein [Source:MGI Symbol;Acc:MGI:105940]
ENSMUSG00000027961	1.49692	0.00164749	Lrrc39	leucine rich repeat containing 39 [Source:MGI Symbol;Acc:MGI:1924557]
ENSMUSG00000031668	0.379443	0.00167338	Eif2ak3	eukaryotic translation initiation factor 2 alpha kinase 3 [Source:MGI Symbol;Acc:MGI:1341830]
ENSMUSG00000025427	-0.471012	0.00167841	Rnf165	ring finger protein 165 [Source:MGI Symbol;Acc:MGI:2444521]
ENSMUSG00000028923	0.493581	0.00168351	Necap2	NECAP endocytosis associated 2 [Source:MGI Symbol;Acc:MGI:1913397]
ENSMUSG00000026135	0.341971	0.00169956	Zfp142	zinc finger protein 142 [Source:MGI Symbol;Acc:MGI:1924514]
ENSMUSG00000002052	0.22181	0.00172293	Supt6	SPT6, histone chaperone and transcription elongation factor [Source:MGI Symbol;Acc:MGI:107726]
ENSMUSG00000025432	1.59714	0.00175736	Avil	advillin [Source:MGI Symbol;Acc:MGI:1333798]
ENSMUSG00000079036	0.456168	0.00182595	Alkbh1	alkB homolog 1, histone H2A dioxygenase [Source:MGI Symbol;Acc:MGI:2384034]
ENSMUSG00000071796	0.568489	0.0020757	6820431F20Rik	RIKEN cDNA 6820431F20 gene [Source:MGI Symbol;Acc:MGI:3694236]
ENSMUSG00000056498	1.95142	0.00218568	Tmem154	transmembrane protein 154 [Source:MGI Symbol;Acc:MGI:2444725]
ENSMUSG00000015837	0.277046	0.00219694	Sqstm1	sequestosome 1 [Source:MGI Symbol;Acc:MGI:107931]
ENSMUSG00000074971	0.83617	0.0022316	Fibin	fin bud initiation factor homolog (zebrafish) [Source:MGI Symbol;Acc:MGI:1914856]
ENSMUSG00000030465	-0.438713	0.00225497	Psd3	pleckstrin and Sec7 domain containing 3 [Source:MGI Symbol;Acc:MGI:1918215]
ENSMUSG00000032078	0.351077	0.002302	Zpr1	ZPR1 zinc finger [Source:MGI Symbol;Acc:MGI:1330262]
ENSMUSG00000018143	0.672559	0.00232047	Mafk	v-maf musculoaponeurotic fibrosarcoma oncogene family, protein K (avian) [Source:MGI Symbol;Acc:MGI:99951]
ENSMUSG00000002307	0.423473	0.00232047	Daxx	Fas death domain-associated protein [Source:MGI Symbol;Acc:MGI:1197015]
ENSMUSG00000006517	-0.691936	0.00234967	Mvd	mevalonate (diphospho) decarboxylase [Source:MGI Symbol;Acc:MGI:2179327]
ENSMUSG00000006724	1.54223	0.00243099	Cyp27b1	cytochrome P450, family 27, subfamily b, polypeptide 1 [Source:MGI Symbol;Acc:MGI:1098274]
ENSMUSG00000040918	0.551994	0.00250941	Slc19a2	solute carrier family 19 (thiamine transporter), member 2 [Source:MGI Symbol;Acc:MGI:1928761]
ENSMUSG00000070420	0.480843	0.00250984	Zscan25	zinc finger and SCAN domain containing 25 [Source:MGI Symbol;Acc:MGI:3647079]
ENSMUSG00000020812	0.902228	0.00254558	1810032O08Rik	small nucleolar RNA host gene 16 [Source:MGI Symbol;Acc:MGI:1913543]
ENSMUSG00000022538	0.43042	0.00261877	Lsg1	large 60S subunit nuclear export GTPase 1 [Source:MGI Symbol;Acc:MGI:107236]
ENSMUSG00000078651	0.74544	0.00275676	Aoc2	amine oxidase, copper containing 2 (retina-specific) [Source:MGI Symbol;Acc:MGI:2668431]
ENSMUSG00000039850	0.352655	0.00275938	Endov	endonuclease V [Source:MGI Symbol;Acc:MGI:2444688]
ENSMUSG00000035004	1.30397	0.0028368	Igsf6	immunoglobulin superfamily, member 6 [Source:MGI Symbol;Acc:MGI:1891393]
ENSMUSG00000027944	0.410808	0.00291033	Hax1	HCLS1 associated X-1 [Source:MGI Symbol;Acc:MGI:1346319]
ENSMUSG00000027293	0.612448	0.00299627	Ehd4	EH-domain containing 4 [Source:MGI Symbol;Acc:MGI:1919619]
ENSMUSG00000013495	-0.358134	0.00302579	Tmem175	transmembrane protein 175 [Source:MGI Symbol;Acc:MGI:1919642]
ENSMUSG00000042997	0.55231	0.00306483	Nhlrc3	NHL repeat containing 3 [Source:MGI Symbol;Acc:MGI:2444520]
ENSMUSG00000047250	0.6054	0.00311978	Ptgs1	prostaglandin-endoperoxide synthase 1 [Source:MGI Symbol;Acc:MGI:97797]
ENSMUSG00000037855	-0.359836	0.00314373	Zfp365	zinc finger protein 365 [Source:MGI Symbol;Acc:MGI:2143676]
ENSMUSG00000030956	-0.321035	0.00324723	Fam53b	family with sequence similarity 53, member B [Source:MGI Symbol;Acc:MGI:1925188]
ENSMUSG00000038418	0.814921	0.0032926	Egr1	early growth response 1 [Source:MGI Symbol;Acc:MGI:95295]
ENSMUSG00000019906	-0.520698	0.00336573	Lin7a	lin-7 homolog A, crumbs cell polarity complex component [Source:MGI Symbol;Acc:MGI:2135609]
ENSMUSG00000032508	0.831599	0.00342835	Myd88	myeloid differentiation primary response gene 88 [Source:MGI Symbol;Acc:MGI:108005]
ENSMUSG00000003814	-0.256281	0.0034956	Calr	calreticulin [Source:MGI Symbol;Acc:MGI:88252]
ENSMUSG00000036181	1.08829	0.00353837	Hist1h1c	H1.2 linker histone, cluster member [Source:MGI Symbol;Acc:MGI:1931526]
ENSMUSG00000038949	-0.332154	0.00357439	Cnst	consortin, connexin sorting protein [Source:MGI Symbol;Acc:MGI:2445141]
ENSMUSG00000040463	0.319396	0.00357634	Mybbp1a	MYB binding protein (P160) 1a [Source:MGI Symbol;Acc:MGI:106181]
ENSMUSG00000032968	-0.491579	0.00360059	Inha	inhibin alpha [Source:MGI Symbol;Acc:MGI:96569]
ENSMUSG00000036158	-0.313731	0.00360585	Prickle1	prickle planar cell polarity protein 1 [Source:MGI Symbol;Acc:MGI:1916034]
ENSMUSG00000079057	0.623471	0.00365028	Cyp4v3	cytochrome P450, family 4, subfamily v, polypeptide 3 [Source:MGI Symbol;Acc:MGI:2142763]
ENSMUSG00000044595	1.1333	0.00368489	Dnd1	DND microRNA-mediated repression inhibitor 1 [Source:MGI Symbol;Acc:MGI:2447763]
ENSMUSG00000040675	0.482167	0.00371703	Mthfd1l	methylenetetrahydrofolate dehydrogenase (NADP+ dependent) 1-like [Source:MGI Symbol;Acc:MGI:1924836]
ENSMUSG00000029249	0.73825	0.00381594	Rest	RE1-silencing transcription factor [Source:MGI Symbol;Acc:MGI:104897]
ENSMUSG00000029009	0.38323	0.00385528	Mthfr	methylenetetrahydrofolate reductase [Source:MGI Symbol;Acc:MGI:106639]
ENSMUSG00000092203	0.684479	0.00392683	1110038B12Rik	RIKEN cDNA 1110038B12 gene [Source:MGI Symbol;Acc:MGI:1916013]
ENSMUSG00000020806	0.918664	0.00401824	Rhbdf2	rhomboid 5 homolog 2 [Source:MGI Symbol;Acc:MGI:2442473]
ENSMUSG00000042759	1.61864	0.00416317	Apobr	apolipoprotein B receptor [Source:MGI Symbol;Acc:MGI:2176230]
ENSMUSG00000026380	0.712558	0.00418001	Tfcp2l1	transcription factor CP2-like 1 [Source:MGI Symbol;Acc:MGI:2444691]
ENSMUSG00000028557	-0.236562	0.00448737	Rnf11	ring finger protein 11 [Source:MGI Symbol;Acc:MGI:1352759]
ENSMUSG00000035530	0.198448	0.00465837	Eif1	eukaryotic translation initiation factor 1 [Source:MGI Symbol;Acc:MGI:105125]
ENSMUSG00000073147	0.441701	0.00470206	5031425E22Rik	RIKEN cDNA 5031425E22 gene [Source:MGI Symbol;Acc:MGI:1923227]
ENSMUSG00000028266	-0.35777	0.00473546	Lmo4	LIM domain only 4 [Source:MGI Symbol;Acc:MGI:109360]
ENSMUSG00000037126	-0.42226	0.00483498	Psd	pleckstrin and Sec7 domain containing [Source:MGI Symbol;Acc:MGI:1920978]
ENSMUSG00000096054	-0.323251	0.00493343	Syne1	spectrin repeat containing, nuclear envelope 1 [Source:MGI Symbol;Acc:MGI:1927152]
ENSMUSG00000046027	0.49783	0.00503157	Stard5	StAR-related lipid transfer (START) domain containing 5 [Source:MGI Symbol;Acc:MGI:2156765]
ENSMUSG00000000409	1.00266	0.0050403	Lck	lymphocyte protein tyrosine kinase [Source:MGI Symbol;Acc:MGI:96756]
ENSMUSG00000024949	0.230123	0.00512595	Sf1	splicing factor 1 [Source:MGI Symbol;Acc:MGI:1095403]
ENSMUSG00000022865	0.352351	0.00575608	Cxadr	coxsackie virus and adenovirus receptor [Source:MGI Symbol;Acc:MGI:1201679]
ENSMUSG00000027951	0.203244	0.00586418	Adar	adenosine deaminase, RNA-specific [Source:MGI Symbol;Acc:MGI:1889575]
ENSMUSG00000035873	0.831043	0.00600832	Pawr	PRKC, apoptosis, WT1, regulator [Source:MGI Symbol;Acc:MGI:2149961]
ENSMUSG00000024640	0.314759	0.00601407	Psat1	phosphoserine aminotransferase 1 [Source:MGI Symbol;Acc:MGI:2183441]
ENSMUSG00000078607	0.606992	0.00608543	1810010H24Rik	RIKEN cDNA 1810010H24 gene [Source:MGI Symbol;Acc:MGI:1916316]
ENSMUSG00000037376	0.340008	0.00614246	Trmt6	tRNA methyltransferase 6 [Source:MGI Symbol;Acc:MGI:1914176]
ENSMUSG00000027737	0.361324	0.00649195	Slc7a11	solute carrier family 7 (cationic amino acid transporter, y+ system), member 11 [Source:MGI Symbol;Acc:MGI:1347355]
ENSMUSG00000039480	0.762525	0.00652643	Nt5dc1	5'-nucleotidase domain containing 1 [Source:MGI Symbol;Acc:MGI:2442446]
ENSMUSG00000018401	-0.306445	0.00653136	Mtmr4	myotubularin related protein 4 [Source:MGI Symbol;Acc:MGI:2180699]
ENSMUSG00000010067	0.601457	0.00680875	Rassf1	Ras association (RalGDS/AF-6) domain family member 1 [Source:MGI Symbol;Acc:MGI:1928386]
ENSMUSG00000025355	1.26783	0.00686177	Mmp19	matrix metallopeptidase 19 [Source:MGI Symbol;Acc:MGI:1927899]
ENSMUSG00000041130	0.317201	0.00697315	Zfp598	zinc finger protein 598 [Source:MGI Symbol;Acc:MGI:2670965]
ENSMUSG00000028954	0.264355	0.0069869	Nub1	negative regulator of ubiquitin-like proteins 1 [Source:MGI Symbol;Acc:MGI:1889001]
ENSMUSG00000036437	-0.446319	0.007012	Npy1r	neuropeptide Y receptor Y1 [Source:MGI Symbol;Acc:MGI:104963]
ENSMUSG00000032548	0.794861	0.00722227	Slco2a1	solute carrier organic anion transporter family, member 2a1 [Source:MGI Symbol;Acc:MGI:1346021]
ENSMUSG00000006445	0.809132	0.00747256	Epha2	Eph receptor A2 [Source:MGI Symbol;Acc:MGI:95278]
ENSMUSG00000079553	1.25224	0.00767834	Kifc1	kinesin family member C1 [Source:MGI Symbol;Acc:MGI:109596]
ENSMUSG00000000538	-0.194321	0.00776199	Tom1l2	target of myb1-like 2 (chicken) [Source:MGI Symbol;Acc:MGI:2443306]
ENSMUSG00000019590	-0.295533	0.00808725	Cyb561	cytochrome b-561 [Source:MGI Symbol;Acc:MGI:103253]
ENSMUSG00000044365	-0.309746	0.00811953	Cxxc4	CXXC finger 4 [Source:MGI Symbol;Acc:MGI:2442112]
ENSMUSG00000023951	0.292567	0.00825016	Vegfa	vascular endothelial growth factor A [Source:MGI Symbol;Acc:MGI:103178]
ENSMUSG00000044149	-0.398803	0.00848497	Nkrf	NF-kappaB repressing factor [Source:MGI Symbol;Acc:MGI:1924536]
ENSMUSG00000031883	-0.502522	0.00852023	Car7	carbonic anhydrase 7 [Source:MGI Symbol;Acc:MGI:103100]
ENSMUSG00000053007	0.679423	0.00880035	Creb5	cAMP responsive element binding protein 5 [Source:MGI Symbol;Acc:MGI:2443973]
ENSMUSG00000045409	0.301216	0.00888262	Trim39	tripartite motif-containing 39 [Source:MGI Symbol;Acc:MGI:1890659]
ENSMUSG00000028869	0.297211	0.00895927	Gnl2	guanine nucleotide binding protein-like 2 (nucleolar) [Source:MGI Symbol;Acc:MGI:2385207]
ENSMUSG00000056216	0.295645	0.00901716	Cebpg	CCAAT/enhancer binding protein (C/EBP), gamma [Source:MGI Symbol;Acc:MGI:104982]
ENSMUSG00000021891	0.339099	0.00918251	Mettl6	methyltransferase like 6 [Source:MGI Symbol;Acc:MGI:1914261]
ENSMUSG00000023755	0.647965	0.00936723	Rhebl1	Ras homolog enriched in brain like 1 [Source:MGI Symbol;Acc:MGI:1916409]
ENSMUSG00000053166	-0.335076	0.00936723	Cdh22	cadherin 22 [Source:MGI Symbol;Acc:MGI:1341843]
ENSMUSG00000026674	0.561818	0.00963189	Ddr2	discoidin domain receptor family, member 2 [Source:MGI Symbol;Acc:MGI:1345277]
ENSMUSG00000052631	1.25029	0.00990961	Sh2d6	SH2 domain containing 6 [Source:MGI Symbol;Acc:MGI:1918380]
ENSMUSG00000036391	0.369327	0.00990961	Sec24a	Sec24 related gene family, member A (S. cerevisiae) [Source:MGI Symbol;Acc:MGI:1924621]
ENSMUSG00000022369	0.834796	0.00994825	Mtbp	Mdm2, transformed 3T3 cell double minute p53 binding protein [Source:MGI Symbol;Acc:MGI:2146005]
ENSMUSG00000034586	-0.21617	0.010172	Hid1	HID1 domain containing [Source:MGI Symbol;Acc:MGI:2445087]
ENSMUSG00000030279	-0.305232	0.01038	C2cd5	C2 calcium-dependent domain containing 5 [Source:MGI Symbol;Acc:MGI:1921991]
ENSMUSG00000074576	0.364681	0.0105135	Mocs3	molybdenum cofactor synthesis 3 [Source:MGI Symbol;Acc:MGI:1916622]
ENSMUSG00000047787	-0.383184	0.0107636	Flrt1	fibronectin leucine rich transmembrane protein 1 [Source:MGI Symbol;Acc:MGI:3026647]
ENSMUSG00000041057	0.435098	0.010823	Wdr43	WD repeat domain 43 [Source:MGI Symbol;Acc:MGI:1919765]
ENSMUSG00000031880	1.16028	0.0108529	Rrad	Ras-related associated with diabetes [Source:MGI Symbol;Acc:MGI:1930943]
ENSMUSG00000030020	-0.296242	0.0108529	Prickle2	prickle planar cell polarity protein 2 [Source:MGI Symbol;Acc:MGI:1925144]
ENSMUSG00000017713	0.765327	0.01088	Tha1	threonine aldolase 1 [Source:MGI Symbol;Acc:MGI:1919026]
ENSMUSG00000028211	0.651536	0.0112377	Trp53inp1	transformation related protein 53 inducible nuclear protein 1 [Source:MGI Symbol;Acc:MGI:1926609]
ENSMUSG00000020455	0.381348	0.0112461	Trim11	tripartite motif-containing 11 [Source:MGI Symbol;Acc:MGI:2137355]
ENSMUSG00000039531	0.437231	0.0112812	Zup1	zinc finger containing ubiquitin peptidase 1 [Source:MGI Symbol;Acc:MGI:1919830]
ENSMUSG00000031488	0.672968	0.0113603	Rab11fip1	RAB11 family interacting protein 1 (class I) [Source:MGI Symbol;Acc:MGI:1923017]
ENSMUSG00000029452	0.701916	0.0113603	Tmem116	transmembrane protein 116 [Source:MGI Symbol;Acc:MGI:1924712]
ENSMUSG00000022340	-0.236877	0.0113603	Sybu	syntabulin (syntaxin-interacting) [Source:MGI Symbol;Acc:MGI:2442392]
ENSMUSG00000029467	-0.287183	0.0115309	Atp2a2	ATPase, Ca++ transporting, cardiac muscle, slow twitch 2 [Source:MGI Symbol;Acc:MGI:88110]
ENSMUSG00000040586	0.541237	0.0116939	Ofd1	OFD1, centriole and centriolar satellite protein [Source:MGI Symbol;Acc:MGI:1350328]
ENSMUSG00000001918	0.734035	0.0116987	Slc1a5	solute carrier family 1 (neutral amino acid transporter), member 5 [Source:MGI Symbol;Acc:MGI:105305]
ENSMUSG00000057691	0.298301	0.0117888	Zfp746	zinc finger protein 746 [Source:MGI Symbol;Acc:MGI:1916478]
ENSMUSG00000021192	0.320296	0.0118	Golga5	golgi autoantigen, golgin subfamily a, 5 [Source:MGI Symbol;Acc:MGI:1351475]
ENSMUSG00000024743	-0.31394	0.0119177	Syt7	synaptotagmin VII [Source:MGI Symbol;Acc:MGI:1859545]
ENSMUSG00000038766	0.294191	0.0119177	Gabpb2	GA repeat binding protein, beta 2 [Source:MGI Symbol;Acc:MGI:95612]
ENSMUSG00000052397	0.313685	0.0119339	Ezr	ezrin [Source:MGI Symbol;Acc:MGI:98931]
ENSMUSG00000071723	-0.306126	0.0120444	Gspt2	G1 to S phase transition 2 [Source:MGI Symbol;Acc:MGI:1316727]
ENSMUSG00000028126	0.275538	0.0120495	Pip5k1a	phosphatidylinositol-4-phosphate 5-kinase, type 1 alpha [Source:MGI Symbol;Acc:MGI:107929]
ENSMUSG00000041375	0.399366	0.0120516	Ccdc9	coiled-coil domain containing 9 [Source:MGI Symbol;Acc:MGI:1921443]
ENSMUSG00000033434	0.527813	0.0121571	Gtpbp6	GTP binding protein 6 (putative) [Source:MGI Symbol;Acc:MGI:1306825]
ENSMUSG00000006676	0.22131	0.0123269	Usp19	ubiquitin specific peptidase 19 [Source:MGI Symbol;Acc:MGI:1918722]
ENSMUSG00000023169	0.232633	0.0123636	Slc38a1	solute carrier family 38, member 1 [Source:MGI Symbol;Acc:MGI:2145895]
ENSMUSG00000004994	0.489031	0.0123636	Ccdc130	coiled-coil domain containing 130 [Source:MGI Symbol;Acc:MGI:1914986]
ENSMUSG00000024610	0.774038	0.0124203	Cd74	CD74 antigen (invariant polypeptide of major histocompatibility complex, class II antigen-associated) [Source:MGI Symbol;Acc:MGI:96534]
ENSMUSG00000038425	0.434583	0.0124703	Poli	polymerase (DNA directed), iota [Source:MGI Symbol;Acc:MGI:1347081]
ENSMUSG00000078307	-0.354017	0.012765	AI593442	expressed sequence AI593442 [Source:MGI Symbol;Acc:MGI:2143099]
ENSMUSG00000031425	-0.235303	0.0130058	Plp1	proteolipid protein (myelin) 1 [Source:MGI Symbol;Acc:MGI:97623]
ENSMUSG00000022971	0.478535	0.0130588	Ifnar2	interferon (alpha and beta) receptor 2 [Source:MGI Symbol;Acc:MGI:1098243]
ENSMUSG00000038150	0.356855	0.0132122	Ormdl3	ORM1-like 3 (S. cerevisiae) [Source:MGI Symbol;Acc:MGI:1913862]
ENSMUSG00000078486	0.635721	0.0132442	Perm1	PPARGC1 and ESRR induced regulator, muscle 1 [Source:MGI Symbol;Acc:MGI:1921433]
ENSMUSG00000040687	-0.215741	0.0132993	Madd	MAP-kinase activating death domain [Source:MGI Symbol;Acc:MGI:2444672]
ENSMUSG00000035569	0.188484	0.0132993	Ankrd11	ankyrin repeat domain 11 [Source:MGI Symbol;Acc:MGI:1924337]
ENSMUSG00000078670	-0.351714	0.0133192	Fam174b	family with sequence similarity 174, member B [Source:MGI Symbol;Acc:MGI:3698178]
ENSMUSG00000000078	0.304856	0.0133192	Klf6	Kruppel-like factor 6 [Source:MGI Symbol;Acc:MGI:1346318]
ENSMUSG00000055725	0.490432	0.0134723	Paqr3	progestin and adipoQ receptor family member III [Source:MGI Symbol;Acc:MGI:2679683]
ENSMUSG00000047205	-0.590343	0.01353	Dusp18	dual specificity phosphatase 18 [Source:MGI Symbol;Acc:MGI:1922469]
ENSMUSG00000000134	0.284639	0.0138854	Tfe3	transcription factor E3 [Source:MGI Symbol;Acc:MGI:98511]
ENSMUSG00000056459	0.583401	0.0140568	Zbtb25	zinc finger and BTB domain containing 25 [Source:MGI Symbol;Acc:MGI:99197]
ENSMUSG00000019831	-0.342631	0.0141837	Wasf1	WASP family, member 1 [Source:MGI Symbol;Acc:MGI:1890563]
ENSMUSG00000048106	0.29398	0.0152979	4632415L05Rik	RIKEN cDNA 4632415L05 gene [Source:MGI Symbol;Acc:MGI:1918058]
ENSMUSG00000033159	0.303075	0.0152979	Cnppd1	cyclin Pas1/PHO80 domain containing 1 [Source:MGI Symbol;Acc:MGI:1916421]
ENSMUSG00000074796	1.01427	0.0154474	Slc4a11	solute carrier family 4, sodium bicarbonate transporter-like, member 11 [Source:MGI Symbol;Acc:MGI:2138987]
ENSMUSG00000028159	0.663155	0.0158209	Dapp1	dual adaptor for phosphotyrosine and 3-phosphoinositides 1 [Source:MGI Symbol;Acc:MGI:1347063]
ENSMUSG00000032826	-0.263688	0.0163144	Ank2	ankyrin 2, brain [Source:MGI Symbol;Acc:MGI:88025]
ENSMUSG00000074656	0.332523	0.0164296	Eif2s2	eukaryotic translation initiation factor 2, subunit 2 (beta) [Source:MGI Symbol;Acc:MGI:1914454]
ENSMUSG00000042549	1.25948	0.0169087	Map2k3os	mitogen-activated protein kinase kinase 3, opposite strand [Source:MGI Symbol;Acc:MGI:1344334]
ENSMUSG00000020657	-0.186462	0.0172823	Dnajc27	DnaJ heat shock protein family (Hsp40) member C27 [Source:MGI Symbol;Acc:MGI:2443036]
ENSMUSG00000038312	0.340442	0.0175421	Edem2	ER degradation enhancer, mannosidase alpha-like 2 [Source:MGI Symbol;Acc:MGI:1915540]
ENSMUSG00000059288	0.551211	0.0175776	Cdyl	chromodomain protein, Y chromosome-like [Source:MGI Symbol;Acc:MGI:1339956]
ENSMUSG00000003382	0.255143	0.0178082	Etv3	ets variant 3 [Source:MGI Symbol;Acc:MGI:1350926]
ENSMUSG00000027438	-0.271174	0.0178983	Napb	N-ethylmaleimide sensitive fusion protein attachment protein beta [Source:MGI Symbol;Acc:MGI:104562]
ENSMUSG00000091264	-0.31257	0.0185084	Smim13	small integral membrane protein 13 [Source:MGI Symbol;Acc:MGI:2652854]
ENSMUSG00000045251	0.451744	0.0186908	Zfp688	zinc finger protein 688 [Source:MGI Symbol;Acc:MGI:1916484]
ENSMUSG00000036067	-0.329545	0.0187177	Slc2a6	solute carrier family 2 (facilitated glucose transporter), member 6 [Source:MGI Symbol;Acc:MGI:2443286]
ENSMUSG00000042419	0.803373	0.0192914	Nfkbil1	nuclear factor of kappa light polypeptide gene enhancer in B cells inhibitor like 1 [Source:MGI Symbol;Acc:MGI:1340031]
ENSMUSG00000024083	-0.267621	0.0196409	Pja2	praja ring finger ubiquitin ligase 2 [Source:MGI Symbol;Acc:MGI:2159342]
ENSMUSG00000052566	0.463848	0.019752	Hook2	hook microtubule tethering protein 2 [Source:MGI Symbol;Acc:MGI:2181664]
ENSMUSG00000020072	1.14942	0.0199087	Pbld2	phenazine biosynthesis-like protein domain containing 2 [Source:MGI Symbol;Acc:MGI:1914557]
ENSMUSG00000040464	0.429241	0.0203218	Gtpbp10	GTP-binding protein 10 (putative) [Source:MGI Symbol;Acc:MGI:2385599]
ENSMUSG00000033106	0.333529	0.0204583	Slc7a6os	solute carrier family 7, member 6 opposite strand [Source:MGI Symbol;Acc:MGI:1916951]
ENSMUSG00000020561	0.35959	0.0206832	Twistnb	RNA polymerase I subunit F [Source:MGI Symbol;Acc:MGI:106292]
ENSMUSG00000020680	0.337018	0.0206898	Taf15	TATA-box binding protein associated factor 15 [Source:MGI Symbol;Acc:MGI:1917689]
ENSMUSG00000006464	-0.227508	0.0208216	Bbs1	Bardet-Biedl syndrome 1 (human) [Source:MGI Symbol;Acc:MGI:1277215]
ENSMUSG00000028894	0.245564	0.0208267	Inpp5b	inositol polyphosphate-5-phosphatase B [Source:MGI Symbol;Acc:MGI:103257]
ENSMUSG00000000934	0.411645	0.0208614	Top1mt	DNA topoisomerase 1, mitochondrial [Source:MGI Symbol;Acc:MGI:1920210]
ENSMUSG00000045896	0.239471	0.0210545	Paip2b	poly(A) binding protein interacting protein 2B [Source:MGI Symbol;Acc:MGI:2386865]
ENSMUSG00000031642	-0.256589	0.021421	Sh3rf1	SH3 domain containing ring finger 1 [Source:MGI Symbol;Acc:MGI:1913066]
ENSMUSG00000041096	0.257374	0.0217809	Tspyl2	TSPY-like 2 [Source:MGI Symbol;Acc:MGI:106244]
ENSMUSG00000023087	-0.291921	0.0219184	Noct	nocturnin [Source:MGI Symbol;Acc:MGI:109382]
ENSMUSG00000040105	-0.295387	0.0220904	Plpp6	phospholipid phosphatase 6 [Source:MGI Symbol;Acc:MGI:1921661]
ENSMUSG00000030880	0.32186	0.0221465	Polr3e	polymerase (RNA) III (DNA directed) polypeptide E [Source:MGI Symbol;Acc:MGI:1349452]
ENSMUSG00000031442	-0.289914	0.0227646	Mcf2l	mcf.2 transforming sequence-like [Source:MGI Symbol;Acc:MGI:103263]
ENSMUSG00000038705	0.276088	0.0234266	Gmeb2	glucocorticoid modulatory element binding protein 2 [Source:MGI Symbol;Acc:MGI:2652836]
ENSMUSG00000017837	0.35698	0.0235787	Nkiras2	NFKB inhibitor interacting Ras-like protein 2 [Source:MGI Symbol;Acc:MGI:1919216]
ENSMUSG00000064120	0.422059	0.0238588	Mocs1	molybdenum cofactor synthesis 1 [Source:MGI Symbol;Acc:MGI:1928904]
ENSMUSG00000024182	0.324438	0.0240627	Axin1	axin 1 [Source:MGI Symbol;Acc:MGI:1096327]
ENSMUSG00000061286	0.385868	0.0240627	Exosc5	exosome component 5 [Source:MGI Symbol;Acc:MGI:107889]
ENSMUSG00000021902	0.582213	0.0241342	Phf7	PHD finger protein 7 [Source:MGI Symbol;Acc:MGI:1919088]
ENSMUSG00000020255	0.26748	0.0241342	D10Wsu102e	NOP protein chaperone 1 [Source:MGI Symbol;Acc:MGI:106381]
ENSMUSG00000030759	-0.313073	0.024303	Far1	fatty acyl CoA reductase 1 [Source:MGI Symbol;Acc:MGI:1914670]
ENSMUSG00000003752	0.517641	0.024303	Itpkc	inositol 1,4,5-trisphosphate 3-kinase C [Source:MGI Symbol;Acc:MGI:2442554]
ENSMUSG00000034889	0.353467	0.0243851	Cactin	cactin, spliceosome C complex subunit [Source:MGI Symbol;Acc:MGI:1917562]
ENSMUSG00000027194	0.268003	0.0244289	Ttc17	tetratricopeptide repeat domain 17 [Source:MGI Symbol;Acc:MGI:1921819]
ENSMUSG00000015839	0.50147	0.0244822	Nfe2l2	nuclear factor, erythroid derived 2, like 2 [Source:MGI Symbol;Acc:MGI:108420]
ENSMUSG00000049516	0.452636	0.0246519	Spty2d1	SPT2 chromatin protein domain containing 1 [Source:MGI Symbol;Acc:MGI:2142062]
ENSMUSG00000024927	0.357476	0.0247302	Rela	v-rel reticuloendotheliosis viral oncogene homolog A (avian) [Source:MGI Symbol;Acc:MGI:103290]
ENSMUSG00000021275	-0.198752	0.0249671	Tecpr2	tectonin beta-propeller repeat containing 2 [Source:MGI Symbol;Acc:MGI:2144865]
ENSMUSG00000029681	0.323349	0.0250878	Bcl7b	B cell CLL/lymphoma 7B [Source:MGI Symbol;Acc:MGI:1332238]
ENSMUSG00000039737	0.367762	0.0251131	Prkrip1	Prkr interacting protein 1 (IL11 inducible) [Source:MGI Symbol;Acc:MGI:1914051]
ENSMUSG00000002985	0.410516	0.0252062	Apoe	apolipoprotein E [Source:MGI Symbol;Acc:MGI:88057]
ENSMUSG00000038909	0.234455	0.0252747	Kat7	K(lysine) acetyltransferase 7 [Source:MGI Symbol;Acc:MGI:2182799]
ENSMUSG00000087590	0.573375	0.0255449	Epb41l4aos	erythrocyte membrane protein band 4.1 like 4a, opposite strand [Source:MGI Symbol;Acc:MGI:1916999]
ENSMUSG00000005846	0.268334	0.0255677	Rsl1d1	ribosomal L1 domain containing 1 [Source:MGI Symbol;Acc:MGI:1913659]
ENSMUSG00000045248	0.459957	0.0256617	Med26	mediator complex subunit 26 [Source:MGI Symbol;Acc:MGI:1917875]
ENSMUSG00000085169	0.87899	0.0256798	Gm10785	predicted gene 10785 [Source:MGI Symbol;Acc:MGI:3642149]
ENSMUSG00000037526	0.290734	0.0271352	Atg14	autophagy related 14 [Source:MGI Symbol;Acc:MGI:1261775]
ENSMUSG00000028945	0.218268	0.0271693	Rheb	Ras homolog enriched in brain [Source:MGI Symbol;Acc:MGI:97912]
ENSMUSG00000025200	0.370627	0.0276108	Cwf19l1	CWF19-like 1, cell cycle control (S. pombe) [Source:MGI Symbol;Acc:MGI:1919752]
ENSMUSG00000026142	0.48574	0.0276498	Rhbdd1	rhomboid domain containing 1 [Source:MGI Symbol;Acc:MGI:1924117]
ENSMUSG00000024792	0.303064	0.0284273	Zfpl1	zinc finger like protein 1 [Source:MGI Symbol;Acc:MGI:1891017]
ENSMUSG00000029528	0.280138	0.0287457	Pxn	paxillin [Source:MGI Symbol;Acc:MGI:108295]
ENSMUSG00000071646	0.237369	0.028761	Mta2	metastasis-associated gene family, member 2 [Source:MGI Symbol;Acc:MGI:1346340]
ENSMUSG00000024137	0.32197	0.0291933	E4f1	E4F transcription factor 1 [Source:MGI Symbol;Acc:MGI:109530]
ENSMUSG00000024404	0.28032	0.0293598	Riok3	RIO kinase 3 [Source:MGI Symbol;Acc:MGI:1914128]
ENSMUSG00000047143	0.641144	0.0302829	Dmrta2	doublesex and mab-3 related transcription factor like family A2 [Source:MGI Symbol;Acc:MGI:2653629]
ENSMUSG00000056749	0.446713	0.0307396	Nfil3	nuclear factor, interleukin 3, regulated [Source:MGI Symbol;Acc:MGI:109495]
ENSMUSG00000021367	0.915897	0.0308228	Edn1	endothelin 1 [Source:MGI Symbol;Acc:MGI:95283]
ENSMUSG00000038806	0.291336	0.0310544	Sde2	SDE2 telomere maintenance homolog (S. pombe) [Source:MGI Symbol;Acc:MGI:2384788]
ENSMUSG00000028494	0.684084	0.0312985	Plin2	perilipin 2 [Source:MGI Symbol;Acc:MGI:87920]
ENSMUSG00000038712	0.278108	0.0315377	Mindy1	MINDY lysine 48 deubiquitinase 1 [Source:MGI Symbol;Acc:MGI:1922257]
ENSMUSG00000026632	-0.355523	0.0322587	Tatdn3	TatD DNase domain containing 3 [Source:MGI Symbol;Acc:MGI:1916222]
ENSMUSG00000025782	0.307806	0.0322735	Taf3	TATA-box binding protein associated factor 3 [Source:MGI Symbol;Acc:MGI:2388097]
ENSMUSG00000055991	0.36108	0.0335538	Zkscan5	zinc finger with KRAB and SCAN domains 5 [Source:MGI Symbol;Acc:MGI:107533]
ENSMUSG00000045576	0.320036	0.0340285	St7l	suppression of tumorigenicity 7-like [Source:MGI Symbol;Acc:MGI:2386964]
ENSMUSG00000040289	-0.258274	0.0342857	Hey1	hairy/enhancer-of-split related with YRPW motif 1 [Source:MGI Symbol;Acc:MGI:1341800]
ENSMUSG00000028826	0.212486	0.0343357	Maco1	macoilin 1 [Source:MGI Symbol;Acc:MGI:1913396]
ENSMUSG00000029607	0.964593	0.0344306	Ankrd61	ankyrin repeat domain 61 [Source:MGI Symbol;Acc:MGI:1913979]
ENSMUSG00000020705	0.199864	0.0345339	Ddx42	DEAD box helicase 42 [Source:MGI Symbol;Acc:MGI:1919297]
ENSMUSG00000040584	0.255617	0.0346849	Abcb1a	ATP-binding cassette, sub-family B (MDR/TAP), member 1A [Source:MGI Symbol;Acc:MGI:97570]
ENSMUSG00000049643	0.251177	0.0347573	2310022A10Rik	RIKEN cDNA 2310022A10 gene [Source:MGI Symbol;Acc:MGI:1913617]
ENSMUSG00000009566	0.446556	0.0347782	Fpgs	folylpolyglutamyl synthetase [Source:MGI Symbol;Acc:MGI:95576]
ENSMUSG00000029313	0.377639	0.0348634	Aff1	AF4/FMR2 family, member 1 [Source:MGI Symbol;Acc:MGI:1100819]
ENSMUSG00000042178	0.356153	0.0350504	Armc5	armadillo repeat containing 5 [Source:MGI Symbol;Acc:MGI:2384586]
ENSMUSG00000022472	-0.192165	0.0352461	Desi1	desumoylating isopeptidase 1 [Source:MGI Symbol;Acc:MGI:106313]
ENSMUSG00000030287	0.348291	0.0353651	Itpr2	inositol 1,4,5-triphosphate receptor 2 [Source:MGI Symbol;Acc:MGI:99418]
ENSMUSG00000031774	0.242883	0.0357834	Fam192a	proteasome activator subunit 3 interacting protein 1 [Source:MGI Symbol;Acc:MGI:1919637]
ENSMUSG00000031077	0.671301	0.0361034	Fadd	Fas (TNFRSF6)-associated via death domain [Source:MGI Symbol;Acc:MGI:109324]
ENSMUSG00000006024	-0.169503	0.0362581	Napa	N-ethylmaleimide sensitive fusion protein attachment protein alpha [Source:MGI Symbol;Acc:MGI:104563]
ENSMUSG00000074818	0.421388	0.0362581	Pdzd7	PDZ domain containing 7 [Source:MGI Symbol;Acc:MGI:3608325]
ENSMUSG00000034457	1.52667	0.0369517	Eda2r	ectodysplasin A2 receptor [Source:MGI Symbol;Acc:MGI:2442860]
ENSMUSG00000042507	0.384177	0.037088	Elmsan1	mitotic deacetylase associated SANT domain protein [Source:MGI Symbol;Acc:MGI:2685106]
ENSMUSG00000047153	0.358314	0.0370923	Khnyn	KH and NYN domain containing [Source:MGI Symbol;Acc:MGI:2451333]
ENSMUSG00000031824	-0.233486	0.0371276	6430548M08Rik	RIKEN cDNA 6430548M08 gene [Source:MGI Symbol;Acc:MGI:2443793]
ENSMUSG00000027300	0.316493	0.0375147	Ubox5	U box domain containing 5 [Source:MGI Symbol;Acc:MGI:2154658]
ENSMUSG00000020484	-0.189606	0.038035	Xbp1	X-box binding protein 1 [Source:MGI Symbol;Acc:MGI:98970]
ENSMUSG00000038564	0.22553	0.0381217	Ift172	intraflagellar transport 172 [Source:MGI Symbol;Acc:MGI:2682064]
ENSMUSG00000048388	-0.282989	0.0381362	Fam171b	family with sequence similarity 171, member B [Source:MGI Symbol;Acc:MGI:2444579]
ENSMUSG00000039145	-0.248873	0.0382438	Camk1d	calcium/calmodulin-dependent protein kinase ID [Source:MGI Symbol;Acc:MGI:2442190]
ENSMUSG00000071793	0.36792	0.0385807	2610005L07Rik	RIKEN cDNA 2610005L07 gene [Source:MGI Symbol;Acc:MGI:1914283]
ENSMUSG00000036006	-0.260839	0.0386898	Ripor2	RHO family interacting cell polarization regulator 2 [Source:MGI Symbol;Acc:MGI:2444879]
ENSMUSG00000050541	-0.27639	0.0388006	Adra1b	adrenergic receptor, alpha 1b [Source:MGI Symbol;Acc:MGI:104774]
ENSMUSG00000030284	-0.283499	0.0391699	Creld1	cysteine-rich with EGF-like domains 1 [Source:MGI Symbol;Acc:MGI:2152539]
ENSMUSG00000017679	-0.2173	0.0391717	Ttpal	tocopherol (alpha) transfer protein-like [Source:MGI Symbol;Acc:MGI:1923330]
ENSMUSG00000021694	0.360996	0.0392181	Ercc8	excision repaiross-complementing rodent repair deficiency, complementation group 8 [Source:MGI Symbol;Acc:MGI:1919241]
ENSMUSG00000031984	0.297912	0.0393908	2810004N23Rik	RIKEN cDNA 2810004N23 gene [Source:MGI Symbol;Acc:MGI:1913773]
ENSMUSG00000022999	0.40695	0.0394793	Lmbr1l	limb region 1 like [Source:MGI Symbol;Acc:MGI:1289247]
ENSMUSG00000050271	-0.276294	0.0395441	Prag1	PEAK1 related kinase activating pseudokinase 1 [Source:MGI Symbol;Acc:MGI:1196223]
ENSMUSG00000071256	0.588802	0.0397414	Zfp213	zinc finger protein 213 [Source:MGI Symbol;Acc:MGI:3053094]
ENSMUSG00000039347	-0.229591	0.0397585	Atp6v0e2	ATPase, H+ transporting, lysosomal V0 subunit E2 [Source:MGI Symbol;Acc:MGI:1923502]
ENSMUSG00000044927	-0.347035	0.0398554	H1fx	H1.10 linker histone [Source:MGI Symbol;Acc:MGI:2685307]
ENSMUSG00000027248	-0.203271	0.0402728	Pdia3	protein disulfide isomerase associated 3 [Source:MGI Symbol;Acc:MGI:95834]
ENSMUSG00000057788	0.343998	0.0410133	Ddx49	DEAD box helicase 49 [Source:MGI Symbol;Acc:MGI:2136689]
ENSMUSG00000017299	0.392613	0.0413428	Dnttip1	deoxynucleotidyltransferase, terminal, interacting protein 1 [Source:MGI Symbol;Acc:MGI:1923483]
ENSMUSG00000072258	0.342093	0.0422922	Taf1a	TATA-box binding protein associated factor, RNA polymerase I, A [Source:MGI Symbol;Acc:MGI:109578]
ENSMUSG00000030643	-0.277321	0.0426557	Rab30	RAB30, member RAS oncogene family [Source:MGI Symbol;Acc:MGI:1923235]
ENSMUSG00000042743	-0.254877	0.0429707	Sgtb	small glutamine-rich tetratricopeptide repeat (TPR)-containing, beta [Source:MGI Symbol;Acc:MGI:2444615]
ENSMUSG00000052763	0.354398	0.0429707	Zfp212	Zinc finger protein 212 [Source:MGI Symbol;Acc:MGI:2682609]
ENSMUSG00000052751	0.219955	0.0431667	Repin1	replication initiator 1 [Source:MGI Symbol;Acc:MGI:1889817]
ENSMUSG00000023947	0.662465	0.0434746	Nfkbie	nuclear factor of kappa light polypeptide gene enhancer in B cells inhibitor, epsilon [Source:MGI Symbol;Acc:MGI:1194908]
ENSMUSG00000030087	0.33808	0.0437393	Klf15	Kruppel-like factor 15 [Source:MGI Symbol;Acc:MGI:1929988]
ENSMUSG00000020224	0.339813	0.0440839	Llph	LLP homolog, long-term synaptic facilitation (Aplysia) [Source:MGI Symbol;Acc:MGI:1913475]
ENSMUSG00000029415	0.262121	0.0441996	Sdad1	SDA1 domain containing 1 [Source:MGI Symbol;Acc:MGI:2140779]
ENSMUSG00000025921	0.342323	0.0448184	Rdh10	retinol dehydrogenase 10 (all-trans) [Source:MGI Symbol;Acc:MGI:1924238]
ENSMUSG00000032000	0.694702	0.0449147	Birc3	baculoviral IAP repeat-containing 3 [Source:MGI Symbol;Acc:MGI:1197007]
ENSMUSG00000042423	0.234098	0.0451223	Fbrs	fibrosin [Source:MGI Symbol;Acc:MGI:104648]
ENSMUSG00000001518	0.253208	0.0452317	Itfg2	integrin alpha FG-GAP repeat containing 2 [Source:MGI Symbol;Acc:MGI:1915450]
ENSMUSG00000039512	0.255191	0.0452317	Uhrf1bp1	UHRF1 (ICBP90) binding protein 1 [Source:MGI Symbol;Acc:MGI:3041238]
ENSMUSG00000025024	0.280341	0.0453325	Smndc1	survival motor neuron domain containing 1 [Source:MGI Symbol;Acc:MGI:1923729]
ENSMUSG00000037887	0.177095	0.045735	Dusp8	dual specificity phosphatase 8 [Source:MGI Symbol;Acc:MGI:106626]
ENSMUSG00000074466	0.8511	0.0465814	Gm15417	predicted gene 15417 [Source:MGI Symbol;Acc:MGI:3642531]
ENSMUSG00000076439	-0.212558	0.0469296	Mog	myelin oligodendrocyte glycoprotein [Source:MGI Symbol;Acc:MGI:97435]
ENSMUSG00000035828	0.335952	0.0484158	Pim3	proviral integration site 3 [Source:MGI Symbol;Acc:MGI:1355297]
ENSMUSG00000028289	-0.264116	0.048444	Epha7	Eph receptor A7 [Source:MGI Symbol;Acc:MGI:95276]
ENSMUSG00000020770	0.302198	0.0485012	Unk	unkempt family zinc finger [Source:MGI Symbol;Acc:MGI:2442456]
ENSMUSG00000066151	0.249065	0.0488802	Fkbp15	FK506 binding protein 15 [Source:MGI Symbol;Acc:MGI:2444782]
ENSMUSG00000046380	0.436739	0.0489626	Jrk	jerky [Source:MGI Symbol;Acc:MGI:106214]
ENSMUSG00000055912	0.364697	0.0490463	Tmem150a	transmembrane protein 150A [Source:MGI Symbol;Acc:MGI:2385244]
ENSMUSG00000097195	0.556794	0.0492242	Snhg5	small nucleolar RNA host gene 5 [Source:MGI Symbol;Acc:MGI:1919905]
ENSMUSG00000039048	0.269055	0.0496706	Foxred1	FAD-dependent oxidoreductase domain containing 1 [Source:MGI Symbol;Acc:MGI:2446262]

## Sheet: P75_Ca_ATF4-dep ISR
Gene ID	log2FoldChange	padj	Gene Name	Gene description
ENSMUSG00000020303	2.53603	3.72768e-44	Stc2	stanniocalcin 2 [Source:MGI Symbol;Acc:MGI:1316731]
ENSMUSG00000028893	2.16557	4.67558e-42	Sesn2	sestrin 2 [Source:MGI Symbol;Acc:MGI:2651874]
ENSMUSG00000025408	1.7934	8.12729e-41	Ddit3	DNA-damage inducible transcript 3 [Source:MGI Symbol;Acc:MGI:109247]
ENSMUSG00000026456	1.51524	8.53449e-40	Cyb5r1	cytochrome b5 reductase 1 [Source:MGI Symbol;Acc:MGI:1919267]
ENSMUSG00000025403	1.53242	5.36867e-38	Shmt2	serine hydroxymethyltransferase 2 (mitochondrial) [Source:MGI Symbol;Acc:MGI:1277989]
ENSMUSG00000031297	1.37778	2.65427e-36	Slc7a3	solute carrier family 7 (cationic amino acid transporter, y+ system), member 3 [Source:MGI Symbol;Acc:MGI:1100521]
ENSMUSG00000027313	1.98845	1.6812e-35	Chac1	ChaC, cation transport regulator 1 [Source:MGI Symbol;Acc:MGI:1916315]
ENSMUSG00000002083	1.85971	7.42687e-31	Bbc3	BCL2 binding component 3 [Source:MGI Symbol;Acc:MGI:2181667]
ENSMUSG00000031960	0.767767	1.12295e-28	Aars	alanyl-tRNA synthetase [Source:MGI Symbol;Acc:MGI:2384560]
ENSMUSG00000024587	0.72173	1.8752e-25	Nars	asparaginyl-tRNA synthetase [Source:MGI Symbol;Acc:MGI:1917473]
ENSMUSG00000060519	2.09977	8.46535e-24	Tor3a	torsin family 3, member A [Source:MGI Symbol;Acc:MGI:1353652]
ENSMUSG00000028811	0.747788	2.2486e-22	Yars	tyrosyl-tRNA synthetase [Source:MGI Symbol;Acc:MGI:2147627]
ENSMUSG00000068739	0.662517	5.33363e-22	Sars	seryl-aminoacyl-tRNA synthetase [Source:MGI Symbol;Acc:MGI:102809]
ENSMUSG00000005667	1.37065	1.47774e-20	Mthfd2	methylenetetrahydrofolate dehydrogenase (NAD+ dependent), methenyltetrahydrofolate cyclohydrolase [Source:MGI Symbol;Acc:MGI:1338850]
ENSMUSG00000024521	2.59627	2.18534e-20	Pmaip1	phorbol-12-myristate-13-acetate-induced protein 1 [Source:MGI Symbol;Acc:MGI:1930146]
ENSMUSG00000010095	0.716154	1.17169e-19	Slc3a2	solute carrier family 3 (activators of dibasic and neutral amino acid transport), member 2 [Source:MGI Symbol;Acc:MGI:96955]
ENSMUSG00000032715	2.64766	1.72667e-18	Trib3	tribbles pseudokinase 3 [Source:MGI Symbol;Acc:MGI:1345675]
ENSMUSG00000086290	1.29085	2.65965e-18	Snhg12	small nucleolar RNA host gene 12 [Source:MGI Symbol;Acc:MGI:1916721]
ENSMUSG00000031490	1.92207	4.30942e-18	Eif4ebp1	eukaryotic translation initiation factor 4E binding protein 1 [Source:MGI Symbol;Acc:MGI:103267]
ENSMUSG00000023067	1.41164	5.31109e-18	Cdkn1a	cyclin-dependent kinase inhibitor 1A (P21) [Source:MGI Symbol;Acc:MGI:104556]
ENSMUSG00000024359	0.542296	7.86047e-18	Hspa9	heat shock protein 9 [Source:MGI Symbol;Acc:MGI:96245]
ENSMUSG00000040010	0.856382	1.27153e-17	Slc7a5	solute carrier family 7 (cationic amino acid transporter, y+ system), member 5 [Source:MGI Symbol;Acc:MGI:1298205]
ENSMUSG00000029826	1.87665	3.88039e-17	Zc3hav1	zinc finger CCCH type, antiviral 1 [Source:MGI Symbol;Acc:MGI:1926031]
ENSMUSG00000027580	1.35035	7.72068e-16	Helz2	helicase with zinc finger 2, transcriptional coactivator [Source:MGI Symbol;Acc:MGI:2385169]
ENSMUSG00000073489	4.38767	1.63861e-15	Ifi204	interferon activated gene 204 [Source:MGI Symbol;Acc:MGI:96429]
ENSMUSG00000069874	1.96243	6.47607e-15	Irgm2	immunity-related GTPase family M member 2 [Source:MGI Symbol;Acc:MGI:1926262]
ENSMUSG00000031026	0.728275	1.03118e-14	Trim66	tripartite motif-containing 66 [Source:MGI Symbol;Acc:MGI:2152406]
ENSMUSG00000056501	1.30713	8.21056e-14	Cebpb	CCAAT/enhancer binding protein (C/EBP), beta [Source:MGI Symbol;Acc:MGI:88373]
ENSMUSG00000041313	0.749949	2.54958e-13	Slc7a1	solute carrier family 7 (cationic amino acid transporter, y+ system), member 1 [Source:MGI Symbol;Acc:MGI:88117]
ENSMUSG00000010755	0.624511	3.05071e-13	Cars	cysteinyl-tRNA synthetase [Source:MGI Symbol;Acc:MGI:1351477]
ENSMUSG00000038539	1.14822	3.54107e-13	Atf5	activating transcription factor 5 [Source:MGI Symbol;Acc:MGI:2141857]
ENSMUSG00000038550	0.966237	7.07679e-12	Ciart	circadian associated repressor of transcription [Source:MGI Symbol;Acc:MGI:2684975]
ENSMUSG00000029752	0.63905	7.70294e-12	Asns	asparagine synthetase [Source:MGI Symbol;Acc:MGI:1350929]
ENSMUSG00000020142	0.677597	8.96428e-12	Slc1a4	solute carrier family 1 (glutamate/neutral amino acid transporter), member 4 [Source:MGI Symbol;Acc:MGI:2135601]
ENSMUSG00000085156	1.71694	2.20461e-11	Snhg15	small nucleolar RNA host gene 15 [Source:MGI Symbol;Acc:MGI:3650059]
ENSMUSG00000020256	1.25436	4.21535e-11	Aldh1l2	aldehyde dehydrogenase 1 family, member L2 [Source:MGI Symbol;Acc:MGI:2444680]
ENSMUSG00000007029	0.618033	4.22092e-11	Vars	valyl-tRNA synthetase [Source:MGI Symbol;Acc:MGI:90675]
ENSMUSG00000073411	2.31656	5.596e-11	H2-D1	histocompatibility 2, D region locus 1 [Source:MGI Symbol;Acc:MGI:95896]
ENSMUSG00000033909	0.610379	7.57118e-11	Usp36	ubiquitin specific peptidase 36 [Source:MGI Symbol;Acc:MGI:1919594]
ENSMUSG00000037851	0.642024	1.02844e-10	Iars	isoleucine-tRNA synthetase [Source:MGI Symbol;Acc:MGI:2145219]
ENSMUSG00000022241	0.687879	1.088e-10	Tars	threonyl-tRNA synthetase [Source:MGI Symbol;Acc:MGI:106314]
ENSMUSG00000030738	0.568606	1.20458e-10	Eif3c	eukaryotic translation initiation factor 3, subunit C [Source:MGI Symbol;Acc:MGI:1926966]
ENSMUSG00000025007	0.653022	1.68711e-10	Aldh18a1	aldehyde dehydrogenase 18 family, member A1 [Source:MGI Symbol;Acc:MGI:1888908]
ENSMUSG00000038742	1.33194	1.82874e-10	Angptl6	angiopoietin-like 6 [Source:MGI Symbol;Acc:MGI:1917976]
ENSMUSG00000029446	0.884331	1.96264e-10	Psph	phosphoserine phosphatase [Source:MGI Symbol;Acc:MGI:97788]
ENSMUSG00000005413	1.52108	4.63097e-10	Hmox1	heme oxygenase 1 [Source:MGI Symbol;Acc:MGI:96163]
ENSMUSG00000023883	0.595898	5.8079e-10	Phf10	PHD finger protein 10 [Source:MGI Symbol;Acc:MGI:1919307]
ENSMUSG00000042406	0.54179	1.23675e-09	Atf4	activating transcription factor 4 [Source:MGI Symbol;Acc:MGI:88096]
ENSMUSG00000026536	6.15542	4.13941e-09	Ifi211	interferon activated gene 211 [Source:MGI Symbol;Acc:MGI:3041120]
ENSMUSG00000029777	0.516104	7.02898e-09	Gars	glycyl-tRNA synthetase [Source:MGI Symbol;Acc:MGI:2449057]
ENSMUSG00000025140	1.46806	1.35821e-08	Pycr1	pyrroline-5-carboxylate reductase 1 [Source:MGI Symbol;Acc:MGI:2384795]
ENSMUSG00000040435	0.955622	9.79562e-08	Ppp1r15a	protein phosphatase 1, regulatory subunit 15A [Source:MGI Symbol;Acc:MGI:1927072]
ENSMUSG00000039158	1.04881	9.90101e-08	Akna	AT-hook transcription factor [Source:MGI Symbol;Acc:MGI:2140340]
ENSMUSG00000002983	1.09113	1.06938e-07	Relb	avian reticuloendotheliosis viral (v-rel) oncogene related B [Source:MGI Symbol;Acc:MGI:103289]
ENSMUSG00000034636	-0.596934	1.71536e-07	Zyg11b	zyg-ll family member B, cell cycle regulator [Source:MGI Symbol;Acc:MGI:2685277]
ENSMUSG00000041168	0.483557	2.41963e-07	Lonp1	lon peptidase 1, mitochondrial [Source:MGI Symbol;Acc:MGI:1921392]
ENSMUSG00000026615	0.559906	5.60495e-07	Eprs	glutamyl-prolyl-tRNA synthetase [Source:MGI Symbol;Acc:MGI:97838]
ENSMUSG00000038235	1.01023	6.31066e-07	F11r	F11 receptor [Source:MGI Symbol;Acc:MGI:1321398]
ENSMUSG00000047407	1.97946	6.31066e-07	Tgif1	TGFB-induced factor homeobox 1 [Source:MGI Symbol;Acc:MGI:1194497]
ENSMUSG00000034667	0.505217	9.26209e-07	Xpot	exportin, tRNA (nuclear export receptor for tRNAs) [Source:MGI Symbol;Acc:MGI:1920442]
ENSMUSG00000020423	0.94896	1.14052e-06	Btg2	BTG anti-proliferation factor 2 [Source:MGI Symbol;Acc:MGI:108384]
ENSMUSG00000053560	0.930439	2.20653e-06	Ier2	immediate early response 2 [Source:MGI Symbol;Acc:MGI:104815]
ENSMUSG00000024493	0.502948	2.41746e-06	Lars	leucyl-tRNA synthetase [Source:MGI Symbol;Acc:MGI:1913808]
ENSMUSG00000078671	0.47268	2.41746e-06	Chd2	chromodomain helicase DNA binding protein 2 [Source:MGI Symbol;Acc:MGI:2448567]
ENSMUSG00000039997	1.61517	2.42029e-06	Ifi203	interferon activated gene 203 [Source:MGI Symbol;Acc:MGI:96428]
ENSMUSG00000045917	0.553878	4.09412e-06	Tmem268	transmembrane protein 268 [Source:MGI Symbol;Acc:MGI:1913920]
ENSMUSG00000040945	0.421191	7.52473e-06	Rcc2	regulator of chromosome condensation 2 [Source:MGI Symbol;Acc:MGI:1919784]
ENSMUSG00000036882	-0.521191	7.69597e-06	Arhgap33	Rho GTPase activating protein 33 [Source:MGI Symbol;Acc:MGI:2673998]
ENSMUSG00000031770	0.566482	8.02111e-06	Herpud1	homocysteine-inducible, endoplasmic reticulum stress-inducible, ubiquitin-like domain member 1 [Source:MGI Symbol;Acc:MGI:1927406]
ENSMUSG00000026628	2.61821	8.30828e-06	Atf3	activating transcription factor 3 [Source:MGI Symbol;Acc:MGI:109384]
ENSMUSG00000042608	0.634519	8.30828e-06	Stk40	serine/threonine kinase 40 [Source:MGI Symbol;Acc:MGI:1921428]
ENSMUSG00000037447	0.706971	8.90912e-06	Arid5a	AT rich interactive domain 5A (MRF1-like) [Source:MGI Symbol;Acc:MGI:2443039]
ENSMUSG00000053398	0.444142	1.02711e-05	Phgdh	3-phosphoglycerate dehydrogenase [Source:MGI Symbol;Acc:MGI:1355330]
ENSMUSG00000027995	2.87674	1.56627e-05	Tlr2	toll-like receptor 2 [Source:MGI Symbol;Acc:MGI:1346060]
ENSMUSG00000031513	0.383977	1.86027e-05	Leprotl1	leptin receptor overlapping transcript-like 1 [Source:MGI Symbol;Acc:MGI:1915442]
ENSMUSG00000086841	1.07957	1.91029e-05	2410006H16Rik	RIKEN cDNA 2410006H16 gene [Source:MGI Symbol;Acc:MGI:1916471]
ENSMUSG00000028542	0.454688	2.04346e-05	Slc6a9	solute carrier family 6 (neurotransmitter transporter, glycine), member 9 [Source:MGI Symbol;Acc:MGI:95760]
ENSMUSG00000018476	0.516088	2.62889e-05	Kdm6b	KDM1 lysine (K)-specific demethylase 6B [Source:MGI Symbol;Acc:MGI:2448492]
ENSMUSG00000057554	0.547911	3.54061e-05	Lgals8	lectin, galactose binding, soluble 8 [Source:MGI Symbol;Acc:MGI:1928481]
ENSMUSG00000040613	1.49944	3.7911e-05	Apobec1	apolipoprotein B mRNA editing enzyme, catalytic polypeptide 1 [Source:MGI Symbol;Acc:MGI:103298]
ENSMUSG00000027122	0.443	3.81656e-05	Arl14ep	ADP-ribosylation factor-like 14 effector protein [Source:MGI Symbol;Acc:MGI:1926020]
ENSMUSG00000025366	0.546352	5.30233e-05	Esyt1	extended synaptotagmin-like protein 1 [Source:MGI Symbol;Acc:MGI:1344426]
ENSMUSG00000030717	0.946054	5.37409e-05	Nupr1	nuclear protein transcription regulator 1 [Source:MGI Symbol;Acc:MGI:1891834]
ENSMUSG00000007594	-0.341551	6.37516e-05	Hapln4	hyaluronan and proteoglycan link protein 4 [Source:MGI Symbol;Acc:MGI:2679531]
ENSMUSG00000047963	1.52974	6.94027e-05	Stbd1	starch binding domain 1 [Source:MGI Symbol;Acc:MGI:1261768]
ENSMUSG00000038508	4.31149	8.26947e-05	Gdf15	growth differentiation factor 15 [Source:MGI Symbol;Acc:MGI:1346047]
ENSMUSG00000021281	1.14463	8.81085e-05	Tnfaip2	tumor necrosis factor, alpha-induced protein 2 [Source:MGI Symbol;Acc:MGI:104960]
ENSMUSG00000026483	0.999392	9.5946e-05	Fam129a	niban apoptosis regulator 1 [Source:MGI Symbol;Acc:MGI:2137237]
ENSMUSG00000024330	0.660179	0.000106567	Col11a2	collagen, type XI, alpha 2 [Source:MGI Symbol;Acc:MGI:88447]
ENSMUSG00000025220	0.415548	0.000107147	Mgea5	O-GlcNAcase [Source:MGI Symbol;Acc:MGI:1932139]
ENSMUSG00000059552	0.554647	0.000126775	Trp53	transformation related protein 53 [Source:MGI Symbol;Acc:MGI:98834]
ENSMUSG00000000628	0.979404	0.000129741	Hk2	hexokinase 2 [Source:MGI Symbol;Acc:MGI:1315197]
ENSMUSG00000033707	-0.537094	0.000138805	Lrrc24	leucine rich repeat containing 24 [Source:MGI Symbol;Acc:MGI:3605040]
ENSMUSG00000033538	2.50813	0.000145212	Casp4	caspase 4, apoptosis-related cysteine peptidase [Source:MGI Symbol;Acc:MGI:107700]
ENSMUSG00000026755	0.344074	0.000154241	Arpc5l	actin related protein 2/3 complex, subunit 5-like [Source:MGI Symbol;Acc:MGI:1921442]
ENSMUSG00000036693	0.514824	0.000203534	Nop14	NOP14 nucleolar protein [Source:MGI Symbol;Acc:MGI:1922666]
ENSMUSG00000026822	3.49934	0.000212879	Lcn2	lipocalin 2 [Source:MGI Symbol;Acc:MGI:96757]
ENSMUSG00000097039	0.80635	0.000214606	Pvt1	Pvt1 oncogene [Source:MGI Symbol;Acc:MGI:97824]
ENSMUSG00000062380	-0.465644	0.000248783	Tubb3	tubulin, beta 3 class III [Source:MGI Symbol;Acc:MGI:107813]
ENSMUSG00000040618	0.481103	0.000382824	Pck2	phosphoenolpyruvate carboxykinase 2 (mitochondrial) [Source:MGI Symbol;Acc:MGI:1860456]
ENSMUSG00000032637	0.275013	0.000417427	Atxn2l	ataxin 2-like [Source:MGI Symbol;Acc:MGI:2446242]
ENSMUSG00000039474	-0.360183	0.000429134	Wfs1	wolframin ER transmembrane glycoprotein [Source:MGI Symbol;Acc:MGI:1328355]
ENSMUSG00000022364	0.619154	0.000741182	Tbc1d31	TBC1 domain family, member 31 [Source:MGI Symbol;Acc:MGI:2684931]
ENSMUSG00000067889	-0.474508	0.000775814	Sptbn2	spectrin beta, non-erythrocytic 2 [Source:MGI Symbol;Acc:MGI:1313261]
ENSMUSG00000097785	0.665413	0.000862354	B230217O12Rik	RIKEN cDNA B230217O12 gene [Source:MGI Symbol;Acc:MGI:2444948]
ENSMUSG00000028708	0.417445	0.000879985	Mknk1	MAP kinase-interacting serine/threonine kinase 1 [Source:MGI Symbol;Acc:MGI:894316]
ENSMUSG00000030421	0.382638	0.000936109	Uri1	URI1, prefoldin-like chaperone [Source:MGI Symbol;Acc:MGI:1342294]
ENSMUSG00000026864	-0.252907	0.000960236	Hspa5	heat shock protein 5 [Source:MGI Symbol;Acc:MGI:95835]
ENSMUSG00000024841	0.424679	0.00115351	Eif1ad	eukaryotic translation initiation factor 1A domain containing [Source:MGI Symbol;Acc:MGI:1917110]
ENSMUSG00000069114	0.514147	0.00129852	Zbtb10	zinc finger and BTB domain containing 10 [Source:MGI Symbol;Acc:MGI:2139883]
ENSMUSG00000047084	0.355239	0.00135773	Ngrn	neugrin, neurite outgrowth associated [Source:MGI Symbol;Acc:MGI:1933212]
ENSMUSG00000031387	1.04961	0.00152005	Renbp	renin binding protein [Source:MGI Symbol;Acc:MGI:105940]
ENSMUSG00000025427	-0.471012	0.00167841	Rnf165	ring finger protein 165 [Source:MGI Symbol;Acc:MGI:2444521]
ENSMUSG00000025432	1.59714	0.00175736	Avil	advillin [Source:MGI Symbol;Acc:MGI:1333798]
ENSMUSG00000056498	1.95142	0.00218568	Tmem154	transmembrane protein 154 [Source:MGI Symbol;Acc:MGI:2444725]
ENSMUSG00000015837	0.277046	0.00219694	Sqstm1	sequestosome 1 [Source:MGI Symbol;Acc:MGI:107931]
ENSMUSG00000074971	0.83617	0.0022316	Fibin	fin bud initiation factor homolog (zebrafish) [Source:MGI Symbol;Acc:MGI:1914856]
ENSMUSG00000030465	-0.438713	0.00225497	Psd3	pleckstrin and Sec7 domain containing 3 [Source:MGI Symbol;Acc:MGI:1918215]
ENSMUSG00000018143	0.672559	0.00232047	Mafk	v-maf musculoaponeurotic fibrosarcoma oncogene family, protein K (avian) [Source:MGI Symbol;Acc:MGI:99951]
ENSMUSG00000040918	0.551994	0.00250941	Slc19a2	solute carrier family 19 (thiamine transporter), member 2 [Source:MGI Symbol;Acc:MGI:1928761]
ENSMUSG00000022538	0.43042	0.00261877	Lsg1	large 60S subunit nuclear export GTPase 1 [Source:MGI Symbol;Acc:MGI:107236]
ENSMUSG00000039850	0.352655	0.00275938	Endov	endonuclease V [Source:MGI Symbol;Acc:MGI:2444688]
ENSMUSG00000027944	0.410808	0.00291033	Hax1	HCLS1 associated X-1 [Source:MGI Symbol;Acc:MGI:1346319]
ENSMUSG00000013495	-0.358134	0.00302579	Tmem175	transmembrane protein 175 [Source:MGI Symbol;Acc:MGI:1919642]
ENSMUSG00000047250	0.6054	0.00311978	Ptgs1	prostaglandin-endoperoxide synthase 1 [Source:MGI Symbol;Acc:MGI:97797]
ENSMUSG00000037855	-0.359836	0.00314373	Zfp365	zinc finger protein 365 [Source:MGI Symbol;Acc:MGI:2143676]
ENSMUSG00000079057	0.623471	0.00365028	Cyp4v3	cytochrome P450, family 4, subfamily v, polypeptide 3 [Source:MGI Symbol;Acc:MGI:2142763]
ENSMUSG00000040675	0.482167	0.00371703	Mthfd1l	methylenetetrahydrofolate dehydrogenase (NADP+ dependent) 1-like [Source:MGI Symbol;Acc:MGI:1924836]
ENSMUSG00000029009	0.38323	0.00385528	Mthfr	methylenetetrahydrofolate reductase [Source:MGI Symbol;Acc:MGI:106639]
ENSMUSG00000092203	0.684479	0.00392683	1110038B12Rik	RIKEN cDNA 1110038B12 gene [Source:MGI Symbol;Acc:MGI:1916013]
ENSMUSG00000042759	1.61864	0.00416317	Apobr	apolipoprotein B receptor [Source:MGI Symbol;Acc:MGI:2176230]
ENSMUSG00000026380	0.712558	0.00418001	Tfcp2l1	transcription factor CP2-like 1 [Source:MGI Symbol;Acc:MGI:2444691]
ENSMUSG00000028557	-0.236562	0.00448737	Rnf11	ring finger protein 11 [Source:MGI Symbol;Acc:MGI:1352759]
ENSMUSG00000035530	0.198448	0.00465837	Eif1	eukaryotic translation initiation factor 1 [Source:MGI Symbol;Acc:MGI:105125]
ENSMUSG00000028266	-0.35777	0.00473546	Lmo4	LIM domain only 4 [Source:MGI Symbol;Acc:MGI:109360]
ENSMUSG00000037126	-0.42226	0.00483498	Psd	pleckstrin and Sec7 domain containing [Source:MGI Symbol;Acc:MGI:1920978]
ENSMUSG00000096054	-0.323251	0.00493343	Syne1	spectrin repeat containing, nuclear envelope 1 [Source:MGI Symbol;Acc:MGI:1927152]
ENSMUSG00000046027	0.49783	0.00503157	Stard5	StAR-related lipid transfer (START) domain containing 5 [Source:MGI Symbol;Acc:MGI:2156765]
ENSMUSG00000000409	1.00266	0.0050403	Lck	lymphocyte protein tyrosine kinase [Source:MGI Symbol;Acc:MGI:96756]
ENSMUSG00000022865	0.352351	0.00575608	Cxadr	coxsackie virus and adenovirus receptor [Source:MGI Symbol;Acc:MGI:1201679]
ENSMUSG00000027951	0.203244	0.00586418	Adar	adenosine deaminase, RNA-specific [Source:MGI Symbol;Acc:MGI:1889575]
ENSMUSG00000035873	0.831043	0.00600832	Pawr	PRKC, apoptosis, WT1, regulator [Source:MGI Symbol;Acc:MGI:2149961]
ENSMUSG00000024640	0.314759	0.00601407	Psat1	phosphoserine aminotransferase 1 [Source:MGI Symbol;Acc:MGI:2183441]
ENSMUSG00000078607	0.606992	0.00608543	1810010H24Rik	RIKEN cDNA 1810010H24 gene [Source:MGI Symbol;Acc:MGI:1916316]
ENSMUSG00000027737	0.361324	0.00649195	Slc7a11	solute carrier family 7 (cationic amino acid transporter, y+ system), member 11 [Source:MGI Symbol;Acc:MGI:1347355]
ENSMUSG00000025355	1.26783	0.00686177	Mmp19	matrix metallopeptidase 19 [Source:MGI Symbol;Acc:MGI:1927899]
ENSMUSG00000041130	0.317201	0.00697315	Zfp598	zinc finger protein 598 [Source:MGI Symbol;Acc:MGI:2670965]
ENSMUSG00000028954	0.264355	0.0069869	Nub1	negative regulator of ubiquitin-like proteins 1 [Source:MGI Symbol;Acc:MGI:1889001]
ENSMUSG00000036437	-0.446319	0.007012	Npy1r	neuropeptide Y receptor Y1 [Source:MGI Symbol;Acc:MGI:104963]
ENSMUSG00000000538	-0.194321	0.00776199	Tom1l2	target of myb1-like 2 (chicken) [Source:MGI Symbol;Acc:MGI:2443306]
ENSMUSG00000044365	-0.309746	0.00811953	Cxxc4	CXXC finger 4 [Source:MGI Symbol;Acc:MGI:2442112]
ENSMUSG00000023951	0.292567	0.00825016	Vegfa	vascular endothelial growth factor A [Source:MGI Symbol;Acc:MGI:103178]
ENSMUSG00000031883	-0.502522	0.00852023	Car7	carbonic anhydrase 7 [Source:MGI Symbol;Acc:MGI:103100]
ENSMUSG00000053007	0.679423	0.00880035	Creb5	cAMP responsive element binding protein 5 [Source:MGI Symbol;Acc:MGI:2443973]
ENSMUSG00000056216	0.295645	0.00901716	Cebpg	CCAAT/enhancer binding protein (C/EBP), gamma [Source:MGI Symbol;Acc:MGI:104982]
ENSMUSG00000023755	0.647965	0.00936723	Rhebl1	Ras homolog enriched in brain like 1 [Source:MGI Symbol;Acc:MGI:1916409]
ENSMUSG00000026674	0.561818	0.00963189	Ddr2	discoidin domain receptor family, member 2 [Source:MGI Symbol;Acc:MGI:1345277]
ENSMUSG00000052631	1.25029	0.00990961	Sh2d6	SH2 domain containing 6 [Source:MGI Symbol;Acc:MGI:1918380]
ENSMUSG00000022369	0.834796	0.00994825	Mtbp	Mdm2, transformed 3T3 cell double minute p53 binding protein [Source:MGI Symbol;Acc:MGI:2146005]
ENSMUSG00000047787	-0.383184	0.0107636	Flrt1	fibronectin leucine rich transmembrane protein 1 [Source:MGI Symbol;Acc:MGI:3026647]
ENSMUSG00000017713	0.765327	0.01088	Tha1	threonine aldolase 1 [Source:MGI Symbol;Acc:MGI:1919026]
ENSMUSG00000028211	0.651536	0.0112377	Trp53inp1	transformation related protein 53 inducible nuclear protein 1 [Source:MGI Symbol;Acc:MGI:1926609]
ENSMUSG00000020455	0.381348	0.0112461	Trim11	tripartite motif-containing 11 [Source:MGI Symbol;Acc:MGI:2137355]
ENSMUSG00000022340	-0.236877	0.0113603	Sybu	syntabulin (syntaxin-interacting) [Source:MGI Symbol;Acc:MGI:2442392]
ENSMUSG00000031488	0.672968	0.0113603	Rab11fip1	RAB11 family interacting protein 1 (class I) [Source:MGI Symbol;Acc:MGI:1923017]
ENSMUSG00000001918	0.734035	0.0116987	Slc1a5	solute carrier family 1 (neutral amino acid transporter), member 5 [Source:MGI Symbol;Acc:MGI:105305]
ENSMUSG00000041375	0.399366	0.0120516	Ccdc9	coiled-coil domain containing 9 [Source:MGI Symbol;Acc:MGI:1921443]
ENSMUSG00000023169	0.232633	0.0123636	Slc38a1	solute carrier family 38, member 1 [Source:MGI Symbol;Acc:MGI:2145895]
ENSMUSG00000024610	0.774038	0.0124203	Cd74	CD74 antigen (invariant polypeptide of major histocompatibility complex, class II antigen-associated) [Source:MGI Symbol;Acc:MGI:96534]
ENSMUSG00000031425	-0.235303	0.0130058	Plp1	proteolipid protein (myelin) 1 [Source:MGI Symbol;Acc:MGI:97623]
ENSMUSG00000038150	0.356855	0.0132122	Ormdl3	ORM1-like 3 (S. cerevisiae) [Source:MGI Symbol;Acc:MGI:1913862]
ENSMUSG00000035569	0.188484	0.0132993	Ankrd11	ankyrin repeat domain 11 [Source:MGI Symbol;Acc:MGI:1924337]
ENSMUSG00000055725	0.490432	0.0134723	Paqr3	progestin and adipoQ receptor family member III [Source:MGI Symbol;Acc:MGI:2679683]
ENSMUSG00000047205	-0.590343	0.01353	Dusp18	dual specificity phosphatase 18 [Source:MGI Symbol;Acc:MGI:1922469]
ENSMUSG00000033159	0.303075	0.0152979	Cnppd1	cyclin Pas1/PHO80 domain containing 1 [Source:MGI Symbol;Acc:MGI:1916421]
ENSMUSG00000074796	1.01427	0.0154474	Slc4a11	solute carrier family 4, sodium bicarbonate transporter-like, member 11 [Source:MGI Symbol;Acc:MGI:2138987]
ENSMUSG00000032826	-0.263688	0.0163144	Ank2	ankyrin 2, brain [Source:MGI Symbol;Acc:MGI:88025]
ENSMUSG00000074656	0.332523	0.0164296	Eif2s2	eukaryotic translation initiation factor 2, subunit 2 (beta) [Source:MGI Symbol;Acc:MGI:1914454]
ENSMUSG00000059288	0.551211	0.0175776	Cdyl	chromodomain protein, Y chromosome-like [Source:MGI Symbol;Acc:MGI:1339956]
ENSMUSG00000091264	-0.31257	0.0185084	Smim13	small integral membrane protein 13 [Source:MGI Symbol;Acc:MGI:2652854]
ENSMUSG00000042419	0.803373	0.0192914	Nfkbil1	nuclear factor of kappa light polypeptide gene enhancer in B cells inhibitor like 1 [Source:MGI Symbol;Acc:MGI:1340031]
ENSMUSG00000052566	0.463848	0.019752	Hook2	hook microtubule tethering protein 2 [Source:MGI Symbol;Acc:MGI:2181664]
ENSMUSG00000040464	0.429241	0.0203218	Gtpbp10	GTP-binding protein 10 (putative) [Source:MGI Symbol;Acc:MGI:2385599]
ENSMUSG00000020561	0.35959	0.0206832	Twistnb	RNA polymerase I subunit F [Source:MGI Symbol;Acc:MGI:106292]
ENSMUSG00000020680	0.337018	0.0206898	Taf15	TATA-box binding protein associated factor 15 [Source:MGI Symbol;Acc:MGI:1917689]
ENSMUSG00000028894	0.245564	0.0208267	Inpp5b	inositol polyphosphate-5-phosphatase B [Source:MGI Symbol;Acc:MGI:103257]
ENSMUSG00000000934	0.411645	0.0208614	Top1mt	DNA topoisomerase 1, mitochondrial [Source:MGI Symbol;Acc:MGI:1920210]
ENSMUSG00000041096	0.257374	0.0217809	Tspyl2	TSPY-like 2 [Source:MGI Symbol;Acc:MGI:106244]
ENSMUSG00000061286	0.385868	0.0240627	Exosc5	exosome component 5 [Source:MGI Symbol;Acc:MGI:107889]
ENSMUSG00000034889	0.353467	0.0243851	Cactin	cactin, spliceosome C complex subunit [Source:MGI Symbol;Acc:MGI:1917562]
ENSMUSG00000015839	0.50147	0.0244822	Nfe2l2	nuclear factor, erythroid derived 2, like 2 [Source:MGI Symbol;Acc:MGI:108420]
ENSMUSG00000049516	0.452636	0.0246519	Spty2d1	SPT2 chromatin protein domain containing 1 [Source:MGI Symbol;Acc:MGI:2142062]
ENSMUSG00000087590	0.573375	0.0255449	Epb41l4aos	erythrocyte membrane protein band 4.1 like 4a, opposite strand [Source:MGI Symbol;Acc:MGI:1916999]
ENSMUSG00000028945	0.218268	0.0271693	Rheb	Ras homolog enriched in brain [Source:MGI Symbol;Acc:MGI:97912]
ENSMUSG00000026142	0.48574	0.0276498	Rhbdd1	rhomboid domain containing 1 [Source:MGI Symbol;Acc:MGI:1924117]
ENSMUSG00000056749	0.446713	0.0307396	Nfil3	nuclear factor, interleukin 3, regulated [Source:MGI Symbol;Acc:MGI:109495]
ENSMUSG00000028494	0.684084	0.0312985	Plin2	perilipin 2 [Source:MGI Symbol;Acc:MGI:87920]
ENSMUSG00000045576	0.320036	0.0340285	St7l	suppression of tumorigenicity 7-like [Source:MGI Symbol;Acc:MGI:2386964]
ENSMUSG00000040584	0.255617	0.0346849	Abcb1a	ATP-binding cassette, sub-family B (MDR/TAP), member 1A [Source:MGI Symbol;Acc:MGI:97570]
ENSMUSG00000029313	0.377639	0.0348634	Aff1	AF4/FMR2 family, member 1 [Source:MGI Symbol;Acc:MGI:1100819]
ENSMUSG00000042178	0.356153	0.0350504	Armc5	armadillo repeat containing 5 [Source:MGI Symbol;Acc:MGI:2384586]
ENSMUSG00000030287	0.348291	0.0353651	Itpr2	inositol 1,4,5-triphosphate receptor 2 [Source:MGI Symbol;Acc:MGI:99418]
ENSMUSG00000006024	-0.169503	0.0362581	Napa	N-ethylmaleimide sensitive fusion protein attachment protein alpha [Source:MGI Symbol;Acc:MGI:104563]
ENSMUSG00000074818	0.421388	0.0362581	Pdzd7	PDZ domain containing 7 [Source:MGI Symbol;Acc:MGI:3608325]
ENSMUSG00000034457	1.52667	0.0369517	Eda2r	ectodysplasin A2 receptor [Source:MGI Symbol;Acc:MGI:2442860]
ENSMUSG00000042507	0.384177	0.037088	Elmsan1	mitotic deacetylase associated SANT domain protein [Source:MGI Symbol;Acc:MGI:2685106]
ENSMUSG00000047153	0.358314	0.0370923	Khnyn	KH and NYN domain containing [Source:MGI Symbol;Acc:MGI:2451333]
ENSMUSG00000027300	0.316493	0.0375147	Ubox5	U box domain containing 5 [Source:MGI Symbol;Acc:MGI:2154658]
ENSMUSG00000020484	-0.189606	0.038035	Xbp1	X-box binding protein 1 [Source:MGI Symbol;Acc:MGI:98970]
ENSMUSG00000038564	0.22553	0.0381217	Ift172	intraflagellar transport 172 [Source:MGI Symbol;Acc:MGI:2682064]
ENSMUSG00000048388	-0.282989	0.0381362	Fam171b	family with sequence similarity 171, member B [Source:MGI Symbol;Acc:MGI:2444579]
ENSMUSG00000022999	0.40695	0.0394793	Lmbr1l	limb region 1 like [Source:MGI Symbol;Acc:MGI:1289247]
ENSMUSG00000050271	-0.276294	0.0395441	Prag1	PEAK1 related kinase activating pseudokinase 1 [Source:MGI Symbol;Acc:MGI:1196223]
ENSMUSG00000039347	-0.229591	0.0397585	Atp6v0e2	ATPase, H+ transporting, lysosomal V0 subunit E2 [Source:MGI Symbol;Acc:MGI:1923502]
ENSMUSG00000042743	-0.254877	0.0429707	Sgtb	small glutamine-rich tetratricopeptide repeat (TPR)-containing, beta [Source:MGI Symbol;Acc:MGI:2444615]
ENSMUSG00000030087	0.33808	0.0437393	Klf15	Kruppel-like factor 15 [Source:MGI Symbol;Acc:MGI:1929988]
ENSMUSG00000029415	0.262121	0.0441996	Sdad1	SDA1 domain containing 1 [Source:MGI Symbol;Acc:MGI:2140779]
ENSMUSG00000025921	0.342323	0.0448184	Rdh10	retinol dehydrogenase 10 (all-trans) [Source:MGI Symbol;Acc:MGI:1924238]
ENSMUSG00000039512	0.255191	0.0452317	Uhrf1bp1	UHRF1 (ICBP90) binding protein 1 [Source:MGI Symbol;Acc:MGI:3041238]
ENSMUSG00000037887	0.177095	0.045735	Dusp8	dual specificity phosphatase 8 [Source:MGI Symbol;Acc:MGI:106626]
ENSMUSG00000074466	0.8511	0.0465814	Gm15417	predicted gene 15417 [Source:MGI Symbol;Acc:MGI:3642531]
ENSMUSG00000035828	0.335952	0.0484158	Pim3	proviral integration site 3 [Source:MGI Symbol;Acc:MGI:1355297]
ENSMUSG00000055912	0.364697	0.0490463	Tmem150a	transmembrane protein 150A [Source:MGI Symbol;Acc:MGI:2385244]
ENSMUSG00000097195	0.556794	0.0492242	Snhg5	small nucleolar RNA host gene 5 [Source:MGI Symbol;Acc:MGI:1919905]

## Sheet: Metascape up
GroupID	Category	Term	Description	LogP	Log(q-value)	InTerm_InList	Genes	Symbols
1_Summary	GO Biological Processes	GO:0045087	innate immune response	-78.5334	-74.1839	143/745	199,558,684,695,710,712,713,714,717,718,721,834,837,972,1435,1436,1535,1536,1594,1906,2207,2209,2214,2268,2634,3004,3055,3105,3106,3133,3148,3263,3394,3428,3429,3430,3433,3437,3627,3659,3663,3665,3669,3684,3718,3902,3932,3934,3958,3965,4063,4064,4067,4210,4599,4615,4671,4688,4791,4938,4939,4940,5294,5336,5371,5610,5777,5971,6347,6351,6352,6359,6366,6472,6556,6672,6737,6772,6773,7096,7097,7098,709…	AIF1,AXL,BST2,BTK,SERPING1,C1QA,C1QB,C1QC,C2,C3,C4B,CASP1,CASP4,CD74,CSF1,CSF1R,CYBA,CYBB,CYP27B1,EDN1,FCER1G,FCGR1A,FCGR3A,FGR,GBP2,GZMM,HCK,HLA-A,HLA-B,HLA-E,HMGB2,HPX,IRF8,IFI16,IFI27,IFI35,IFIT2,IFIT3,CXCL10,IRF1,IRF5,IRF7,ISG20,ITGAM,JAK3,LAG3,LCK,LCN2,LGALS3,LGALS9,LY9,CD180,LYN,MEFV,MX1,MYD88,NAIP,NCF2,NFKB2,OAS1,OAS2,OAS3,PIK3CG,PLCG2,PML,EIF2AK2,PTPN6,RELB,CCL2,CCL4,CCL5,CCL15,CCL21,SHMT…
1_Member	GO Biological Processes	GO:0045087	innate immune response	-78.5334	-74.1839	143/745	199,558,684,695,710,712,713,714,717,718,721,834,837,972,1435,1436,1535,1536,1594,1906,2207,2209,2214,2268,2634,3004,3055,3105,3106,3133,3148,3263,3394,3428,3429,3430,3433,3437,3627,3659,3663,3665,3669,3684,3718,3902,3932,3934,3958,3965,4063,4064,4067,4210,4599,4615,4671,4688,4791,4938,4939,4940,5294,5336,5371,5610,5777,5971,6347,6351,6352,6359,6366,6472,6556,6672,6737,6772,6773,7096,7097,7098,709…	AIF1,AXL,BST2,BTK,SERPING1,C1QA,C1QB,C1QC,C2,C3,C4B,CASP1,CASP4,CD74,CSF1,CSF1R,CYBA,CYBB,CYP27B1,EDN1,FCER1G,FCGR1A,FCGR3A,FGR,GBP2,GZMM,HCK,HLA-A,HLA-B,HLA-E,HMGB2,HPX,IRF8,IFI16,IFI27,IFI35,IFIT2,IFIT3,CXCL10,IRF1,IRF5,IRF7,ISG20,ITGAM,JAK3,LAG3,LCK,LCN2,LGALS3,LGALS9,LY9,CD180,LYN,MEFV,MX1,MYD88,NAIP,NCF2,NFKB2,OAS1,OAS2,OAS3,PIK3CG,PLCG2,PML,EIF2AK2,PTPN6,RELB,CCL2,CCL4,CCL5,CCL15,CCL21,SHMT…
[truncated: 244 more rows]

## Sheet: Metascape down
GroupID	Category	Term	Description	LogP	Log(q-value)	InTerm_InList	Genes	Symbols
1_Summary	WikiPathways	WP103	Cholesterol biosynthesis	-15.3991	-11.1301	9/15	13121,13360,14137,20775,66234,192156,208715,235293,319554,74754,170459,16835,11686,171281,74134,217480,13489	Cyp51,Dhcr7,Fdft1,Sqle,Msmo1,Mvd,Hmgcs1,Sc5d,Idi1,Dhcr24,Stard4,Ldlr,Alox12b,Acot3,Cyp2s1,Dgkb,Drd2
1_Member	WikiPathways	WP103	Cholesterol biosynthesis	-15.3991	-11.1301	9/15	13121,13360,14137,20775,66234,192156,208715,235293,319554	Cyp51,Dhcr7,Fdft1,Sqle,Msmo1,Mvd,Hmgcs1,Sc5d,Idi1
[truncated: 243 more rows]

## Sheet: GO reactome up
Category	Term	Count	%	PValue	Genes	List Total	Pop Hits	Pop Total	Fold Enrichment	Bonferroni	Benjamini	FDR
[truncated: 269 more rows]

## Sheet: GO reactome down
Category	Term	Count	%	PValue	Genes	List Total	Pop Hits	Pop Total	Fold Enrichment	Bonferroni	Benjamini	FDR
[truncated: 29 more rows]

[truncated: 6 more sheets: P75_Ca GO0002376 IR, P75_Ca GO0016126 sterol, P75_Ca Mitochondrial, Sheet1, Sheet2, Sheet3]
