# Supplementary material for: Molecular basis of neurodegeneration in a mouse model of Polr3-related disease
Source: eLife. 2024 Nov 5;13:RP95314. doi: 10.7554/eLife.95314 (PMC11537486; doi:10.7554/eLife.95314)
Supplement: Supplementary file 2. [file elife-95314-supp2.xlsx]

## Sheet: Legend Table S2
Supplementary File 2. Mouse cell type-specific DE genes in Polr3a-tamKI cerebra at P75. DE genes from P75 cerebra (p-adj < 0.05 Log2FoldChange >|0|) were queried against the top 500 mouse cell type-specific genes for oligodendrocytes, neurons, microglia, astrocytes and endothelial cells as defined in McKenzie et.al., (2018) Sci Rep 8, 8868.

## Sheet: Mouse cell type-specific genes
Gene ID	log2FoldChange	padj	Cell type oligodendrocyte		Gene ID	log2FC	padj	Cell type neuron		Gene ID	log2FC	padj	Cell type microglia		Gene ID	log2FC	padj	Cell type astrocyte		Gene ID	log2FC	padj	Cell type endothelial
ENSMUSG00000022840	-0.534594	1.51547e-05	Adcy5		ENSMUSG00000035551	-0.771516	0.0388453	Igfbpl1		ENSMUSG00000076617	-0.643956	0.000924089	Ighm		ENSMUSG00000078640	-1.22003	0.0156233	Gm11627		ENSMUSG00000044534	-1.59057	0.00146501	Ackr2
ENSMUSG00000032420	-0.508116	0.0221465	Nt5e		ENSMUSG00000025221	-0.76029	2.83083e-11	Kcnip2		ENSMUSG00000040659	-0.314524	0.00103238	Efhd2		ENSMUSG00000031604	-0.681813	3.42929e-10	Msmo1		ENSMUSG00000020178	-0.999926	1.39428e-06	Adora2a
ENSMUSG00000011256	-0.482353	0.0129729	Adam19		ENSMUSG00000090223	-0.755614	0.0318163	Pcp4		ENSMUSG00000037902	-0.180683	0.0386961	Sirpa		ENSMUSG00000034687	-0.649857	4.44207e-05	Fras1		ENSMUSG00000032946	-0.506338	0.00275115	Rasgrp2
ENSMUSG00000001542	-0.467135	0.000868212	Ell2		ENSMUSG00000022342	-0.743828	0.000275952	Kcnv1		ENSMUSG00000029098	0.277417	0.0441489	Acox3		ENSMUSG00000003974	-0.562286	0.000478581	Grm3		ENSMUSG00000025986	-0.48007	0.00113057	Slc39a10
ENSMUSG00000037679	-0.466991	0.000239415	Inf2		ENSMUSG00000050558	-0.732037	0.00480679	Prokr2		ENSMUSG00000021948	0.299414	0.000230705	Prkcd		ENSMUSG00000053004	-0.516545	0.000739126	Hrh1		ENSMUSG00000025795	-0.320496	0.0142784	Rassf3
ENSMUSG00000104283	-0.434394	0.0463215	Gm37459		ENSMUSG00000045441	-0.710578	2.93905e-05	Gprin3		ENSMUSG00000022951	0.346776	0.00632684	Rcan1		ENSMUSG00000007682	-0.50195	0.000545382	Dio2		ENSMUSG00000067336	-0.317252	0.0446236	Bmpr2
ENSMUSG00000028328	-0.433766	0.000145212	Tmod1		ENSMUSG00000027971	-0.710137	0.000212633	Ndst4		ENSMUSG00000016528	0.366763	0.0117629	Mapkapk2		ENSMUSG00000002341	-0.455737	2.29006e-05	Ncan		ENSMUSG00000032908	-0.29485	0.0350234	Sgpp2
ENSMUSG00000041220	-0.428235	0.000418879	Elovl6		ENSMUSG00000027270	-0.710033	2.30817e-09	Lamp5		ENSMUSG00000031827	0.400408	0.00754932	Cotl1		ENSMUSG00000028064	-0.430676	0.000217884	Sema4a		ENSMUSG00000016382	-0.280257	0.0202098	Pls3
ENSMUSG00000027298	-0.415447	0.00114771	Tyro3		ENSMUSG00000035033	-0.699671	2.14061e-07	Tbr1		ENSMUSG00000025232	0.401967	0.0401383	Hexa		ENSMUSG00000028527	-0.42898	0.000239068	Ak4		ENSMUSG00000038264	-0.267596	0.0147496	Sema7a
ENSMUSG00000038668	-0.413718	0.00149255	Lpar1		ENSMUSG00000024008	-0.691834	1.38049e-09	Cpne5		ENSMUSG00000028708	0.417445	0.000879985	Mknk1		ENSMUSG00000000202	-0.428941	0.00561436	Btbd17		ENSMUSG00000006356	-0.222659	0.0271352	Crip2
ENSMUSG00000032060	-0.410593	0.00614401	Cryab		ENSMUSG00000087022	-0.645128	0.00743946	9130024F11Rik		ENSMUSG00000002147	0.425041	0.0163832	Stat6		ENSMUSG00000029408	-0.39632	0.000230705	Abcb9		ENSMUSG00000020315	-0.211646	0.0429707	Sptbn1
ENSMUSG00000033066	-0.4051	0.00120356	Gas7		ENSMUSG00000038677	-0.642621	0.000101063	Scube3		ENSMUSG00000020097	0.464495	0.00013425	Sgpl1		ENSMUSG00000026259	-0.39158	0.000239415	Ngef		ENSMUSG00000040488	-0.192036	0.0296616	Ltbp4
ENSMUSG00000022324	-0.403034	0.00494027	Matn2		ENSMUSG00000029755	-0.639422	0.0498205	Dlx5		ENSMUSG00000031659	0.491582	0.0203731	Adcy7		ENSMUSG00000026614	-0.381453	0.00575608	Slc30a10		ENSMUSG00000022010	-0.184366	0.0139352	Tsc22d1
ENSMUSG00000001833	-0.40088	0.00418676	Sept7		ENSMUSG00000040118	-0.632538	1.86027e-05	Cacna2d1		ENSMUSG00000048163	0.507796	0.0312985	Selplg		ENSMUSG00000027797	-0.363962	0.00306483	Dclk1		ENSMUSG00000025278	0.261455	0.00598788	Flnb
ENSMUSG00000021594	-0.398802	0.0293598	Srd5a1		ENSMUSG00000024186	-0.626791	0.00109677	Rgs11		ENSMUSG00000052837	0.513096	0.0123566	Junb		ENSMUSG00000021613	-0.363468	0.0150315	Hapln1		ENSMUSG00000025037	0.283161	0.00895027	Maoa
ENSMUSG00000062591	-0.383799	9.79727e-05	Tubb4a		ENSMUSG00000058624	-0.607332	0.000122272	Gda		ENSMUSG00000021190	0.558788	0.000185667	Lgmn		ENSMUSG00000058254	-0.346977	1.59223e-06	Tspan7		ENSMUSG00000020154	0.285708	0.0395441	Ptprb
ENSMUSG00000024077	-0.371906	0.00262645	Strn		ENSMUSG00000028785	-0.59476	4.23182e-05	Hpca		ENSMUSG00000005142	0.561518	8.06185e-05	Man2b1		ENSMUSG00000021071	-0.32332	0.00309788	Trim9		ENSMUSG00000030096	0.297776	0.00508579	Slc6a6
ENSMUSG00000026447	-0.371332	0.00248348	Pik3c2b		ENSMUSG00000030729	-0.589489	0.000296792	Pgm2l1		ENSMUSG00000063849	0.56548	0.000247076	Ppcdc		ENSMUSG00000010663	-0.322591	1.16846e-06	Fads1		ENSMUSG00000001946	0.306646	0.0327319	Esam
ENSMUSG00000027254	-0.36767	0.0008232	Map1a		ENSMUSG00000031932	-0.576169	2.6799e-05	Gpr83		ENSMUSG00000031770	0.566482	8.02111e-06	Herpud1		ENSMUSG00000022763	-0.307029	0.0296854	Aifm3		ENSMUSG00000029648	0.319751	0.000518476	Flt1
ENSMUSG00000029095	-0.366828	0.0118032	Ablim2		ENSMUSG00000047842	-0.572822	1.63236e-05	Diras2		ENSMUSG00000026321	0.579317	0.0123351	Tnfrsf11a		ENSMUSG00000000247	-0.287011	0.0266406	Lhx2		ENSMUSG00000044033	0.323274	0.0172114	Ccdc141
ENSMUSG00000004151	-0.360851	0.0049506	Etv1		ENSMUSG00000022756	-0.571471	9.99345e-06	Slc7a4		ENSMUSG00000048277	0.583427	0.0243566	Syngr2		ENSMUSG00000030605	-0.283026	0.0170099	Mfge8		ENSMUSG00000032232	0.34817	0.00505135	Cgnl1
ENSMUSG00000041205	-0.360687	0.00805727	Map6d1		ENSMUSG00000031224	-0.571079	0.00355759	Magee2		ENSMUSG00000022817	0.584641	0.00555209	Itgb5		ENSMUSG00000026080	-0.262439	0.0121821	Chst10		ENSMUSG00000026193	0.355839	0.0283739	Fn1
ENSMUSG00000029602	-0.357181	0.0256617	Rasal1		ENSMUSG00000090063	-0.549639	0.0400186	Dlx6os1		ENSMUSG00000047250	0.6054	0.00311978	Ptgs1		ENSMUSG00000018849	-0.260335	0.00498491	Wwc1		ENSMUSG00000006386	0.365167	0.0141904	Tek
ENSMUSG00000021573	-0.349087	1.2374e-06	Tppp		ENSMUSG00000027500	-0.54706	5.80012e-09	Stmn2		ENSMUSG00000034957	0.614713	0.0159719	Cebpa		ENSMUSG00000021820	-0.253857	0.000690789	Camk2g		ENSMUSG00000069833	0.366923	0.00168685	Ahnak
ENSMUSG00000061451	-0.348983	8.9289e-06	Tmem151a		ENSMUSG00000029335	-0.538225	0.0047195	Bmp3		ENSMUSG00000022488	0.621548	0.00601967	Nckap1l		ENSMUSG00000022340	-0.236877	0.0113603	Sybu		ENSMUSG00000031871	0.384462	0.035043	Cdh5
ENSMUSG00000041889	-0.347839	0.00011178	Shisa4		ENSMUSG00000027827	-0.53088	9.20881e-06	Kcnab1		ENSMUSG00000054675	0.633052	2.96135e-05	Tmem119		ENSMUSG00000029636	-0.23599	0.0435895	Wasf3		ENSMUSG00000021585	0.384782	0.0295684	Cast
ENSMUSG00000052229	-0.347455	0.0191605	Gpr17		ENSMUSG00000024647	-0.528478	7.45757e-08	Cbln2		ENSMUSG00000074622	0.634058	0.00130359	Mafb		ENSMUSG00000033629	-0.209328	0.0132846	Hacd3		ENSMUSG00000036256	0.391204	0.00768672	Igfbp7
ENSMUSG00000036745	-0.34663	0.00504375	Ttll7		ENSMUSG00000025889	-0.52141	0.000183014	Snca		ENSMUSG00000042608	0.634519	8.30828e-06	Stk40		ENSMUSG00000030428	-0.176369	0.0255449	Ttyh1		ENSMUSG00000021701	0.412696	5.87028e-06	Plk2
ENSMUSG00000078794	-0.332669	0.00246796	Dact3		ENSMUSG00000009216	-0.516929	0.000210494	Fam163b		ENSMUSG00000030220	0.63706	0.00562298	Arhgdib		ENSMUSG00000020263	0.19715	0.0265761	Appl2		ENSMUSG00000022297	0.420512	0.0204405	Fzd6
ENSMUSG00000029053	-0.324553	0.00104654	Prkcz		ENSMUSG00000037984	-0.516352	0.00019085	Neurod6		ENSMUSG00000034595	0.641991	0.00149895	Ppp1r18		ENSMUSG00000023951	0.292567	0.00825016	Vegfa		ENSMUSG00000074364	0.421222	0.0250908	Ehd2
ENSMUSG00000026255	-0.32333	0.0315272	Efhd1		ENSMUSG00000025867	-0.510584	0.000228106	Cplx2		ENSMUSG00000023947	0.662465	0.0434746	Nfkbie		ENSMUSG00000052397	0.313685	0.0119339	Ezr		ENSMUSG00000034037	0.439971	0.0082604	Fgd5
ENSMUSG00000030616	-0.311463	0.00292479	Sytl2		ENSMUSG00000021587	-0.505737	0.00044713	Pcsk1		ENSMUSG00000028159	0.663155	0.0158209	Dapp1		ENSMUSG00000030087	0.33808	0.0437393	Klf15		ENSMUSG00000018830	0.444759	0.0218141	Myh11
ENSMUSG00000038453	-0.30259	0.00863011	Srcin1		ENSMUSG00000021852	-0.505434	0.00215282	Slc35f4		ENSMUSG00000018143	0.672559	0.00232047	Mafk		ENSMUSG00000026701	0.345153	0.0387447	Prdx6		ENSMUSG00000027435	0.44682	0.0113643	Cd93
ENSMUSG00000032517	-0.277804	0.0302842	Mobp		ENSMUSG00000025582	-0.494874	3.5771e-05	Nptx1		ENSMUSG00000032089	0.675373	0.00901716	Il10ra		ENSMUSG00000027737	0.361324	0.00649195	Slc7a11		ENSMUSG00000028108	0.44893	0.0385727	Ecm1
ENSMUSG00000069670	-0.273544	0.0390861	Nkain2		ENSMUSG00000021066	-0.494046	1.08748e-06	Atl1		ENSMUSG00000020941	0.678192	0.000202631	Map3k14		ENSMUSG00000000567	0.375034	0.013835	Sox9		ENSMUSG00000020572	0.45265	0.00278171	Nampt
ENSMUSG00000034648	-0.26637	0.0112406	Lrrn1		ENSMUSG00000053025	-0.489602	0.000434278	Sv2b		ENSMUSG00000036246	0.68029	0.000814093	Gmip		ENSMUSG00000002985	0.410516	0.0252062	Apoe		ENSMUSG00000041445	0.464803	0.0429707	Mmrn2
ENSMUSG00000034488	-0.262645	0.0314551	Edil3		ENSMUSG00000028222	-0.485017	1.59313e-05	Calb1		ENSMUSG00000037860	0.687403	0.019812	Aim2		ENSMUSG00000022114	0.411419	7.7875e-05	Spry2		ENSMUSG00000025608	0.47927	0.000342789	Podxl
ENSMUSG00000001036	-0.262045	0.0152615	Epn2		ENSMUSG00000092083	-0.483023	0.0236934	Kcnb2		ENSMUSG00000026288	0.687795	0.00453098	Inpp5d		ENSMUSG00000026173	0.464069	0.0163402	Plcd4		ENSMUSG00000027800	0.480604	0.0046864	Tm4sf1
ENSMUSG00000004633	-0.259042	0.0355548	Chn2		ENSMUSG00000025738	-0.48038	5.86798e-07	Fbxl16		ENSMUSG00000034041	0.700665	0.0266433	Lyl1		ENSMUSG00000063558	0.475526	0.017409	Aox1		ENSMUSG00000019846	0.482879	0.0129005	Lama4
ENSMUSG00000043067	-0.246975	0.0254554	Dpy19l1		ENSMUSG00000026163	-0.478719	0.000185408	Sphkap		ENSMUSG00000020573	0.70269	0.0443526	Pik3cg		ENSMUSG00000040690	0.506237	0.0185986	Col16a1		ENSMUSG00000030218	0.505778	0.0251253	Mgp
ENSMUSG00000032064	-0.238929	0.02994	Dixdc1		ENSMUSG00000027820	-0.477724	0.0130281	Mme		ENSMUSG00000047810	0.707845	0.0120815	Ccdc88b		ENSMUSG00000034463	0.509161	0.000551035	Scara3		ENSMUSG00000032125	0.519601	0.00733978	Robo4
ENSMUSG00000028347	-0.236538	0.0389024	Tmeff1		ENSMUSG00000040136	-0.477158	0.000646604	Abcc8		ENSMUSG00000052085	0.714361	0.0181959	Dock8		ENSMUSG00000048402	0.510575	0.0305772	Gli2		ENSMUSG00000038058	0.521448	0.0148349	Nod1
ENSMUSG00000031425	-0.235303	0.0130058	Plp1		ENSMUSG00000040258	-0.475771	0.038035	Nxph4		ENSMUSG00000024621	0.714763	0.000315749	Csf1r		ENSMUSG00000045934	0.526828	0.020883	Mtmr11		ENSMUSG00000034485	0.530061	0.00323015	Uaca
ENSMUSG00000033769	-0.232824	0.0235007	Exoc6b		ENSMUSG00000046159	-0.475098	0.000348891	Chrm3		ENSMUSG00000018008	0.720211	8.79163e-05	Cyth4		ENSMUSG00000038094	0.547432	0.0033634	Atp13a4		ENSMUSG00000021806	0.531229	0.0393398	Nid2
ENSMUSG00000068923	-0.229814	0.00115323	Syt11		ENSMUSG00000019888	-0.471736	0.0106482	Mgat4c		ENSMUSG00000024818	0.724915	0.0459601	Slc25a45		ENSMUSG00000001555	0.553224	0.0155307	Fkbp10		ENSMUSG00000025366	0.546352	5.30233e-05	Esyt1
ENSMUSG00000018398	-0.229659	0.00330032	Sept8		ENSMUSG00000025427	-0.471012	0.00167841	Rnf165		ENSMUSG00000072844	0.740628	0.043859	G530011O06Rik		ENSMUSG00000008540	0.568876	0.015314	Mgst1		ENSMUSG00000079018	0.546956	2.56441e-05	Ly6c1
ENSMUSG00000021703	-0.228358	0.0392502	Serinc5		ENSMUSG00000049744	-0.466695	0.0179509	Arhgap15		ENSMUSG00000047875	0.749395	0.0143809	Gpr157		ENSMUSG00000036570	0.598567	0.00650716	Fxyd1		ENSMUSG00000046808	0.549878	0.046964	Atp10d
ENSMUSG00000032537	-0.225793	0.0372089	Ephb1		ENSMUSG00000062380	-0.465644	0.000248783	Tubb3		ENSMUSG00000033192	0.758831	0.00763204	Lpcat2		ENSMUSG00000097877	0.602384	0.0283836	Gm26703		ENSMUSG00000015053	0.570967	0.0287894	Gata2
ENSMUSG00000076432	-0.224307	0.000412445	Ywhaq		ENSMUSG00000042761	-0.464476	0.0279277	Mrap2		ENSMUSG00000032122	0.763092	0.0461221	Slc37a2		ENSMUSG00000042613	0.60635	8.44747e-05	Pbxip1		ENSMUSG00000071847	0.576395	1.63521e-05	Apcdd1
ENSMUSG00000033595	-0.223685	0.0385807	Lgi3		ENSMUSG00000040373	-0.463744	0.0201317	Cacng5		ENSMUSG00000005373	0.766894	0.043859	Mlxipl		ENSMUSG00000036560	0.612423	0.00205903	Lgi4		ENSMUSG00000020717	0.588779	0.00039619	Pecam1
ENSMUSG00000035547	-0.223127	0.0255262	Capn5		ENSMUSG00000038128	-0.463458	0.0100791	Camk4		ENSMUSG00000024610	0.774038	0.0124203	Cd74		ENSMUSG00000008090	0.629464	0.00309393	Fgfrl1		ENSMUSG00000031586	0.596813	0.0475201	Rbpms
ENSMUSG00000032118	-0.221268	0.00794689	Fez1		ENSMUSG00000054459	-0.462903	1.9056e-06	Vsnl1		ENSMUSG00000030681	0.793778	0.000516076	Mvp		ENSMUSG00000020142	0.677597	8.96428e-12	Slc1a4		ENSMUSG00000032231	0.618305	0.00235731	Anxa2
ENSMUSG00000027223	-0.220643	0.0342857	Mapk8ip1		ENSMUSG00000027273	-0.458557	8.79103e-05	Snap25		ENSMUSG00000018819	0.796976	0.00243884	Lsp1		ENSMUSG00000044122	0.707381	0.0344306	Proca1		ENSMUSG00000028073	0.626031	0.00780154	Pear1
ENSMUSG00000031605	-0.219188	0.034875	Klhl2		ENSMUSG00000040536	-0.453625	0.00130284	Necab1		ENSMUSG00000042228	0.802978	0.00670671	Lyn		ENSMUSG00000026380	0.712558	0.00418001	Tfcp2l1		ENSMUSG00000036867	0.660176	0.044985	Smad6
ENSMUSG00000025728	-0.215319	0.0122008	Pigq		ENSMUSG00000037217	-0.452155	8.06908e-07	Syn1		ENSMUSG00000049625	0.803346	0.0246161	Tifab		ENSMUSG00000027962	0.770328	9.64162e-10	Vcam1		ENSMUSG00000031488	0.672968	0.0113603	Rab11fip1
ENSMUSG00000076439	-0.212558	0.0469296	Mog		ENSMUSG00000009394	-0.451873	5.10358e-06	Syn2		ENSMUSG00000034792	0.838211	0.0160187	Gna15		ENSMUSG00000059336	0.827385	0.000212939	Slc14a1		ENSMUSG00000026814	0.714636	1.82832e-14	Eng
ENSMUSG00000026109	-0.210619	0.0348232	Tmeff2		ENSMUSG00000048251	-0.449765	5.37033e-05	Bcl11b		ENSMUSG00000060063	0.839213	0.0420951	Alox5ap		ENSMUSG00000002602	0.830756	3.66852e-05	Axl		ENSMUSG00000041313	0.749949	2.54958e-13	Slc7a1
ENSMUSG00000025375	-0.210374	0.0491234	Aatk		ENSMUSG00000020635	-0.449704	0.015667	Fkbp1b		ENSMUSG00000048865	0.850914	0.00444386	Arhgap30		ENSMUSG00000015451	0.925492	0.00151841	C4a		ENSMUSG00000024066	0.761852	0.00504974	Xdh
ENSMUSG00000006651	-0.201818	0.0332681	Aplp1		ENSMUSG00000028033	-0.447675	0.00373033	Kcnq5		ENSMUSG00000034330	0.863957	0.000908641	Plcg2		ENSMUSG00000037686	1.06947	0.000775814	Aspg		ENSMUSG00000032548	0.794861	0.00722227	Slco2a1
ENSMUSG00000029106	-0.197287	0.00911485	Add1		ENSMUSG00000020953	-0.446282	0.00146019	Coch		ENSMUSG00000046410	0.887207	0.00303182	Kcnk6		ENSMUSG00000005087	1.12609	0.000787416	Cd44		ENSMUSG00000040010	0.856382	1.27153e-17	Slc7a5
ENSMUSG00000029621	-0.193358	0.0436217	Arpc1a		ENSMUSG00000071234	-0.442151	0.0375147	Syndig1l		ENSMUSG00000031101	0.887437	0.0322501	Sash3		ENSMUSG00000036480	1.17043	0.0382307	Prss56		ENSMUSG00000045930	0.870606	0.000327212	Clec14a
ENSMUSG00000022472	-0.192165	0.0352461	Desi1		ENSMUSG00000032735	-0.441706	0.00336573	Ablim3		ENSMUSG00000051506	0.90418	0.0129729	Wdfy4		ENSMUSG00000078349	1.19739	0.000119239	AW011738		ENSMUSG00000031170	0.907219	0.00137034	Slc38a5
ENSMUSG00000026442	-0.174298	0.0206971	Nfasc		ENSMUSG00000032355	-0.44154	0.0295675	Mlip		ENSMUSG00000055541	0.908259	0.001482	Lair1		ENSMUSG00000030111	2.06586	0.000245594	A2m		ENSMUSG00000021367	0.915897	0.0308228	Edn1
ENSMUSG00000020331	-0.162627	0.0470148	Hcn2		ENSMUSG00000097451	-0.441418	0.000119695	Rian		ENSMUSG00000040747	0.91237	0.00575928	Cd53		ENSMUSG00000020932	2.46166	4.8274e-09	Gfap		ENSMUSG00000043631	0.921471	0.00012217	Ecm2
ENSMUSG00000024640	0.314759	0.00601407	Psat1		ENSMUSG00000070304	-0.44113	3.48667e-06	Scn2b		ENSMUSG00000025888	0.92421	0.0201796	Casp1							ENSMUSG00000044258	0.932354	0.00344753	Ctla2a
ENSMUSG00000030880	0.32186	0.0221465	Polr3e		ENSMUSG00000041708	-0.440928	2.03438e-05	Mpped1		ENSMUSG00000007891	0.928661	0.00766379	Ctsd							ENSMUSG00000001930	0.935228	1.97373e-13	Vwf
ENSMUSG00000024816	0.325797	0.0465814	Frmd8		ENSMUSG00000044067	-0.437707	0.0415621	Gpr22		ENSMUSG00000024013	0.932375	0.00127614	Fgd2							ENSMUSG00000026483	0.999392	9.5946e-05	Fam129a
ENSMUSG00000036528	0.416134	0.0155122	Ppfibp2		ENSMUSG00000032925	-0.434586	0.0471272	Itgbl1		ENSMUSG00000042190	0.934363	0.00394961	Cmklr1							ENSMUSG00000027684	1.01196	0.00310708	Mecom
ENSMUSG00000028542	0.454688	2.04346e-05	Slc6a9		ENSMUSG00000058248	-0.43414	1.63725e-05	Kcnh1		ENSMUSG00000026786	0.941125	0.00786555	Apbb1ip							ENSMUSG00000006360	1.02387	0.00138675	Crip1
ENSMUSG00000024197	0.474497	0.00347005	Plin3		ENSMUSG00000040125	-0.434062	0.00133348	Gpr26		ENSMUSG00000079110	0.94329	0.000487493	Capn3							ENSMUSG00000021668	1.07797	1.12517e-10	Polk
ENSMUSG00000033985	0.484386	0.0489626	Tesk2		ENSMUSG00000032532	-0.433282	0.00277338	Cck		ENSMUSG00000020423	0.94896	1.14052e-06	Btg2							ENSMUSG00000054404	1.21893	1.06938e-07	Slfn5
ENSMUSG00000053007	0.679423	0.00880035	Creb5		ENSMUSG00000030302	-0.432276	4.83268e-05	Atp2b2		ENSMUSG00000001750	0.966073	7.45757e-08	Tcirg1							ENSMUSG00000075010	1.22092	0.0333248	AW112010
ENSMUSG00000015966	0.697112	0.0306988	Il17rb		ENSMUSG00000055540	-0.432252	0.00573939	Epha6		ENSMUSG00000053158	0.970765	1.08019e-05	Fes							ENSMUSG00000075602	1.26499	1.24302e-19	Ly6a
ENSMUSG00000041801	0.807677	4.21727e-07	Phlda3		ENSMUSG00000050663	-0.427533	0.0132846	Trhde		ENSMUSG00000004730	0.970898	0.000696479	Adgre1							ENSMUSG00000026728	1.31207	0.00142881	Vim
ENSMUSG00000022548	0.816126	0.00428568	Apod		ENSMUSG00000055026	-0.425615	0.00104279	Gabrg3		ENSMUSG00000013707	0.970952	0.0209333	Tnfaip8l2							ENSMUSG00000071001	1.34775	0.0287894	Hrct1
ENSMUSG00000060981	2.6242	1.33812e-08	Hist1h4h		ENSMUSG00000031778	-0.421741	0.000279268	Cx3cl1		ENSMUSG00000021822	0.971108	0.00167058	Plau							ENSMUSG00000027907	1.37977	3.30321e-08	S100a11
					ENSMUSG00000053192	-0.421169	3.41897e-05	Mllt11		ENSMUSG00000002699	0.975314	0.00622825	Lcp2							ENSMUSG00000034881	1.491	0.000243642	Tbxa2r
					ENSMUSG00000029403	-0.417398	0.00213984	Cdkl2		ENSMUSG00000000628	0.979404	0.000129741	Hk2							ENSMUSG00000022146	1.55681	0.00646261	Osmr
					ENSMUSG00000056486	-0.411252	0.000737571	Chn1		ENSMUSG00000022439	0.99368	0.000212879	Parvg							ENSMUSG00000026946	1.5781	2.82179e-06	Nmi
					ENSMUSG00000078117	-0.40938	0.0424063	Gm16485		ENSMUSG00000018654	1.00124	0.00351474	Ikzf1							ENSMUSG00000079363	1.67534	9.72788e-09	Gbp4
					ENSMUSG00000056296	-0.407985	2.12101e-06	Synpr		ENSMUSG00000030263	1.00857	0.0114398	Lrmp							ENSMUSG00000039304	1.79202	1.39438e-18	Tnfsf10
					ENSMUSG00000021301	-0.407829	0.00192987	Hecw1		ENSMUSG00000024349	1.01581	0.00193083	Tmem173							ENSMUSG00000056498	1.95142	0.00218568	Tmem154
					ENSMUSG00000044912	-0.404392	0.00382449	Syt16		ENSMUSG00000021665	1.01893	0.00198416	Hexb							ENSMUSG00000026222	2.05946	3.49505e-16	Sp100
					ENSMUSG00000031137	-0.401804	0.00031816	Fgf13		ENSMUSG00000037868	1.03394	0.0389514	Egr2							ENSMUSG00000047735	2.07501	1.2374e-06	Samd9l
					ENSMUSG00000040640	-0.400975	0.00687768	Erc2		ENSMUSG00000039899	1.05426	0.000927087	Fgl2							ENSMUSG00000031304	2.38976	0.000177167	Il2rg
					ENSMUSG00000050963	-0.396129	0.00787639	Kcns2		ENSMUSG00000048779	1.05629	0.00376845	P2ry6							ENSMUSG00000023903	2.39761	0.00105819	Mmp25
					ENSMUSG00000025092	-0.395786	0.000356613	Hspa12a		ENSMUSG00000015950	1.08622	0.000127139	Ncf1							ENSMUSG00000078921	2.41749	5.93186e-08	Tgtp2
					ENSMUSG00000091002	-0.391083	0.0349742	Tcerg1l		ENSMUSG00000033450	1.09929	0.0446969	Tagap							ENSMUSG00000040296	2.61548	4.00451e-13	Ddx58
					ENSMUSG00000039372	-0.390982	0.00572161	March4		ENSMUSG00000019832	1.13002	0.000404835	Rab32							ENSMUSG00000040483	2.63751	1.30341e-27	Xaf1
					ENSMUSG00000019852	-0.389688	0.00168295	Arfgef3		ENSMUSG00000028581	1.13172	0.00567261	Laptm5							ENSMUSG00000019326	2.94504	8.27929e-19	Aoc3
					ENSMUSG00000033953	-0.389091	0.000398961	Ppp3r1		ENSMUSG00000032691	1.13507	0.023314	Nlrp3							ENSMUSG00000028270	2.98691	1.45081e-15	Gbp2
					ENSMUSG00000023192	-0.385478	0.00409612	Grm2		ENSMUSG00000021998	1.14105	2.65643e-05	Lcp1							ENSMUSG00000078920	3.09856	1.69786e-13	Ifi47
					ENSMUSG00000030806	-0.37958	0.00019935	Stx1b		ENSMUSG00000029771	1.14965	7.72107e-06	Irf5							ENSMUSG00000104713	3.51685	3.08106e-06	Gbp6
					ENSMUSG00000036760	-0.374149	0.00352251	Kcnk9		ENSMUSG00000031880	1.16028	0.0108529	Rrad							ENSMUSG00000033355	3.63861	3.80396e-18	Rtp4
					ENSMUSG00000064225	-0.373494	0.00258432	Paqr9		ENSMUSG00000020143	1.1777	0.0467705	Dock2							ENSMUSG00000030107	4.27936	3.06061e-20	Usp18
					ENSMUSG00000072769	-0.372766	0.0187913	Gm10419		ENSMUSG00000029925	1.18465	0.00459597	Tbxas1							ENSMUSG00000054072	4.43331	6.52392e-12	Iigp1
					ENSMUSG00000026833	-0.371882	0.000326077	Olfm1		ENSMUSG00000036908	1.1859	1.60028e-06	Unc93b1							ENSMUSG00000028037	4.69622	3.97086e-17	Ifi44
					ENSMUSG00000039717	-0.362159	0.000647642	Ralyl		ENSMUSG00000038811	1.1882	0.00637261	Gngt2							ENSMUSG00000025498	4.75116	9.85252e-27	Irf7
					ENSMUSG00000031870	-0.361942	0.0152307	Pgr		ENSMUSG00000028599	1.22554	2.3595e-05	Tnfrsf1b							ENSMUSG00000029561	4.92993	6.0696e-32	Oasl2
					ENSMUSG00000044349	-0.360757	0.0177261	Snhg11		ENSMUSG00000034708	1.22563	9.71301e-05	Grn
					ENSMUSG00000061578	-0.360109	0.00134293	Ksr2		ENSMUSG00000031838	1.22636	0.000540573	Ifi30
					ENSMUSG00000042532	-0.360025	0.0217809	Golga7b		ENSMUSG00000027848	1.22767	0.00586418	Olfml3
					ENSMUSG00000026824	-0.357312	0.0193959	Kcnj3		ENSMUSG00000075122	1.22909	0.0211429	Cd80
					ENSMUSG00000024403	-0.357052	0.00121279	Atp6v1g2		ENSMUSG00000030793	1.23096	0.000696479	Pycard
					ENSMUSG00000075318	-0.354033	0.0144152	Scn2a		ENSMUSG00000044350	1.23292	2.28514e-06	Lacc1
					ENSMUSG00000028546	-0.353224	0.000442439	Elavl4		ENSMUSG00000040345	1.25302	0.00449392	Arhgap9
					ENSMUSG00000029804	-0.351388	0.000110579	Herc3		ENSMUSG00000024965	1.25623	3.86284e-05	Fermt3
					ENSMUSG00000055078	-0.350766	0.00311978	Gabra5		ENSMUSG00000016256	1.26993	0.000461447	Ctsz
					ENSMUSG00000030350	-0.348835	0.010854	Prmt8		ENSMUSG00000033777	1.27461	0.00134086	Tlr13
					ENSMUSG00000035864	-0.345338	0.00428282	Syt1		ENSMUSG00000037411	1.28625	0.00111157	Serpine1
					ENSMUSG00000000861	-0.344936	0.00605312	Bcl11a		ENSMUSG00000030560	1.29476	6.23206e-07	Ctsc
					ENSMUSG00000020436	-0.344558	0.00188755	Gabrg2		ENSMUSG00000030786	1.29507	1.48628e-06	Itgam
					ENSMUSG00000036564	-0.343581	0.000296792	Ndrg4		ENSMUSG00000018774	1.29761	6.6917e-07	Cd68
					ENSMUSG00000037541	-0.343104	0.00741496	Shank2		ENSMUSG00000035004	1.30397	0.0028368	Igsf6
					ENSMUSG00000046442	-0.34287	0.0174122	Ppm1e		ENSMUSG00000049130	1.30491	0.0106077	C5ar1
					ENSMUSG00000029651	-0.342679	0.000299525	Mtus2		ENSMUSG00000000958	1.30538	2.34443e-05	Slc7a7
					ENSMUSG00000040855	-0.342012	0.0170099	Reps2		ENSMUSG00000056501	1.30713	8.21056e-14	Cebpb
					ENSMUSG00000036438	-0.337773	0.00304146	Calm2		ENSMUSG00000045322	1.31298	0.00258331	Tlr9
					ENSMUSG00000020297	-0.33682	0.000647927	Nsg2		ENSMUSG00000030579	1.33833	0.00892192	Tyrobp
					ENSMUSG00000029223	-0.334766	0.00022463	Uchl1		ENSMUSG00000029915	1.34004	0.00459597	Clec5a
					ENSMUSG00000036067	-0.329545	0.0187177	Slc2a6		ENSMUSG00000060791	1.34992	0.00236265	Gmfg
					ENSMUSG00000063430	-0.325195	0.0327125	Wscd2		ENSMUSG00000030798	1.3542	3.42938e-07	Cd37
					ENSMUSG00000026797	-0.324327	0.00147273	Stxbp1		ENSMUSG00000020120	1.3566	4.76318e-09	Plek
					ENSMUSG00000046532	-0.324203	0.00818842	Ar		ENSMUSG00000020399	1.36856	0.00167841	Havcr2
					ENSMUSG00000057897	-0.322071	0.0232501	Camk2b		ENSMUSG00000031662	1.38603	7.51792e-05	Snx20
					ENSMUSG00000032011	-0.321779	0.00156289	Thy1		ENSMUSG00000034116	1.39314	3.04451e-05	Vav1
					ENSMUSG00000049176	-0.321135	0.00900857	Frmpd4		ENSMUSG00000024397	1.41542	1.23438e-07	Aif1
					ENSMUSG00000027581	-0.319645	0.00870675	Stmn3		ENSMUSG00000002111	1.44866	7.82034e-08	Spi1
					ENSMUSG00000061911	-0.316182	0.0134413	Myt1l		ENSMUSG00000010142	1.45331	0.0003632	Tnfrsf13b
					ENSMUSG00000027965	-0.31616	0.00992353	Olfm3		ENSMUSG00000026656	1.45342	2.92867e-05	Fcgr2b
					ENSMUSG00000024743	-0.31394	0.0119177	Syt7		ENSMUSG00000031103	1.46726	9.33994e-05	Elf4
					ENSMUSG00000033419	-0.312466	0.00341729	Snap91		ENSMUSG00000022901	1.47097	6.14502e-05	Cd86
					ENSMUSG00000017400	-0.312061	0.0108591	Stac2		ENSMUSG00000058715	1.47662	0.00260354	Fcer1g
					ENSMUSG00000093536	-0.312028	0.0354771	Smim17		ENSMUSG00000040613	1.49944	3.7911e-05	Apobec1
					ENSMUSG00000051391	-0.31177	1.62261e-06	Ywhag		ENSMUSG00000038147	1.52061	0.000113941	Cd84
					ENSMUSG00000031840	-0.308149	0.00154519	Rab3a		ENSMUSG00000003283	1.53551	2.52974e-10	Hck
					ENSMUSG00000052981	-0.307667	0.000979715	Ube2ql1		ENSMUSG00000026480	1.54536	9.35916e-08	Ncf2
					ENSMUSG00000053825	-0.305443	0.0357591	Ppfia2		ENSMUSG00000052142	1.54882	5.21945e-07	Rasal3
					ENSMUSG00000029757	-0.304829	0.00344047	Dync1i1		ENSMUSG00000036896	1.55313	7.33031e-06	C1qc
					ENSMUSG00000041986	-0.30472	0.00518474	Elmod1		ENSMUSG00000026177	1.56012	6.61135e-06	Slc11a1
					ENSMUSG00000031391	-0.303656	0.000297504	L1cam		ENSMUSG00000022148	1.56789	2.22021e-06	Fyb
					ENSMUSG00000034675	-0.301593	0.0178341	Dbn1		ENSMUSG00000004266	1.57261	2.80013e-08	Ptpn6
					ENSMUSG00000033615	-0.298189	0.00162512	Cplx1		ENSMUSG00000036905	1.58026	2.19426e-05	C1qb
					ENSMUSG00000034818	-0.296925	0.0206898	Celf5		ENSMUSG00000064267	1.58248	5.29374e-05	Hvcn1
					ENSMUSG00000046204	-0.296508	0.0222589	Pnma2		ENSMUSG00000098112	1.58381	6.65718e-09	Bin2
					ENSMUSG00000038255	-0.295257	0.0221298	Neurod2		ENSMUSG00000031165	1.58824	0.000197397	Was
					ENSMUSG00000025777	-0.294503	0.0136777	Gdap1		ENSMUSG00000023992	1.59333	0.000319119	Trem2
					ENSMUSG00000008153	-0.292967	0.00512425	Clstn3		ENSMUSG00000028859	1.59593	7.10361e-09	Csf3r
					ENSMUSG00000082229	-0.292828	0.016581	Nap1l2		ENSMUSG00000022952	1.59696	0.000223176	Runx1
					ENSMUSG00000074505	-0.292108	0.0372382	Fat3		ENSMUSG00000000290	1.61062	0.00025686	Itgb2
					ENSMUSG00000034336	-0.291352	7.81011e-05	Ina		ENSMUSG00000041515	1.62172	1.65875e-09	Irf8
					ENSMUSG00000026825	-0.290879	0.00355759	Dnm1		ENSMUSG00000043157	1.63239	0.00972981	Arl11
					ENSMUSG00000034187	-0.290774	0.00145553	Nsf		ENSMUSG00000033220	1.64408	3.48667e-06	Rac2
					ENSMUSG00000021991	-0.288702	0.0151175	Cacna2d3		ENSMUSG00000024300	1.66268	1.44744e-07	Myo1f
					ENSMUSG00000042078	-0.288584	0.0425027	Svop		ENSMUSG00000002668	1.66391	5.29284e-07	Dennd1c
					ENSMUSG00000028137	-0.287125	0.0252023	Celf3		ENSMUSG00000052160	1.6884	3.13989e-11	Pld4
					ENSMUSG00000045967	-0.286395	0.0437422	Gpr158		ENSMUSG00000040552	1.6898	4.98118e-05	C3ar1
					ENSMUSG00000014592	-0.285019	0.00148616	Camta1		ENSMUSG00000018920	1.69483	1.44421e-06	Cxcl16
					ENSMUSG00000037492	-0.284651	0.0291073	Zmat4		ENSMUSG00000037731	1.73245	1.88634e-06	Themis2
					ENSMUSG00000008658	-0.284373	0.029312	Rbfox1		ENSMUSG00000027399	1.74251	0.00358362	Il1a
					ENSMUSG00000021087	-0.280584	0.00109487	Rtn1		ENSMUSG00000009145	1.77737	4.26734e-05	Dqx1
					ENSMUSG00000029189	-0.280282	0.0118627	Sel1l3		ENSMUSG00000022831	1.78368	3.41223e-08	Hcls1
					ENSMUSG00000044288	-0.278043	0.0139352	Cnr1		ENSMUSG00000040751	1.784	5.60932e-06	Lat2
					ENSMUSG00000045038	-0.276954	0.0354371	Prkce		ENSMUSG00000031264	1.78734	0.000174833	Btk
					ENSMUSG00000044835	-0.276905	0.00300913	Ankrd45		ENSMUSG00000034947	1.83458	4.31954e-06	Tmem106a
					ENSMUSG00000027438	-0.271174	0.0178983	Napb		ENSMUSG00000038642	1.84653	7.06827e-07	Ctss
					ENSMUSG00000029361	-0.269706	0.00631976	Nos1		ENSMUSG00000036887	1.85274	3.85077e-06	C1qa
					ENSMUSG00000027834	-0.265163	0.0302793	Serpini1		ENSMUSG00000037318	1.8847	0.00429632	Traf3ip3
					ENSMUSG00000028289	-0.264116	0.048444	Epha7		ENSMUSG00000029204	1.89209	0.00103771	Rhoh
					ENSMUSG00000017740	-0.263391	0.0103031	Slc12a5		ENSMUSG00000046805	1.93331	0.000169145	Mpeg1
					ENSMUSG00000034825	-0.263251	0.00780762	Nrip3		ENSMUSG00000026395	1.93777	9.73548e-10	Ptprc
					ENSMUSG00000026764	-0.261406	0.0128002	Kif5c		ENSMUSG00000006519	1.94004	5.33548e-13	Cyba
					ENSMUSG00000028246	-0.260359	0.0327329	Faxc		ENSMUSG00000052760	1.94822	0.000698246	A630001G21Rik
					ENSMUSG00000021816	-0.254624	0.0266129	Ppp3cb		ENSMUSG00000047407	1.97946	6.31066e-07	Tgif1
					ENSMUSG00000032549	-0.25358	0.0141837	Rab6b		ENSMUSG00000047180	2.02472	9.84227e-06	Neurl3
					ENSMUSG00000059361	-0.251088	0.0253132	Nrsn2		ENSMUSG00000039013	2.03438	0.00672588	Siglecf
					ENSMUSG00000043388	-0.248111	0.0016555	Tmem130		ENSMUSG00000021423	2.0398	9.98932e-06	Ly86
					ENSMUSG00000047261	-0.24732	0.00292084	Gap43		ENSMUSG00000056888	2.11122	0.00151722	Glipr1
					ENSMUSG00000024268	-0.245314	0.0149346	Celf4		ENSMUSG00000022014	2.20607	3.1448e-08	Epsti1
					ENSMUSG00000066392	-0.241646	0.0449147	Nrxn3		ENSMUSG00000025017	2.20925	6.79041e-11	Pik3ap1
					ENSMUSG00000040797	-0.239432	0.0466913	Iqsec3		ENSMUSG00000040528	2.21798	0.0167621	Milr1
					ENSMUSG00000026959	-0.238309	0.0076599	Grin1		ENSMUSG00000053318	2.23992	0.00311978	Slamf8
					ENSMUSG00000028086	-0.232114	0.0349501	Fbxw7		ENSMUSG00000023393	2.26456	2.13067e-06	Slc17a9
					ENSMUSG00000039546	-0.230377	0.0225935	Ajap1		ENSMUSG00000027398	2.27316	0.00303068	Il1b
					ENSMUSG00000028488	-0.227177	0.0308992	Sh3gl2		ENSMUSG00000032596	2.27556	1.84888e-15	Uba7
					ENSMUSG00000054423	-0.222376	0.0260675	Cadps		ENSMUSG00000044827	2.29661	1.95652e-05	Tlr1
					ENSMUSG00000020524	-0.214619	0.0283299	Gria1		ENSMUSG00000015355	2.36299	8.2427e-05	Cd48
					ENSMUSG00000040907	-0.195	0.0424254	Atp1a3		ENSMUSG00000071713	2.41036	0.00294485	Csf2rb
					ENSMUSG00000032890	-0.191501	0.0335981	Rims3		ENSMUSG00000067714	2.41387	0.000111829	Lpar5
					ENSMUSG00000058975	-0.162528	0.0438856	Kcnc1		ENSMUSG00000021624	2.4299	8.63767e-05	Cd180
					ENSMUSG00000029819	0.333787	0.0307662	Npy		ENSMUSG00000030124	2.47311	7.48577e-06	Lag3
					ENSMUSG00000029752	0.63905	7.70294e-12	Asns		ENSMUSG00000071715	2.47746	2.65994e-06	Ncf4
					ENSMUSG00000037428	0.678445	1.79003e-12	Vgf		ENSMUSG00000047798	2.54583	0.000135778	Cd300lf
					ENSMUSG00000031026	0.728275	1.03118e-14	Trim66		ENSMUSG00000027322	2.56078	2.18358e-09	Siglec1
					ENSMUSG00000024526	0.798253	0.0351351	Cidea		ENSMUSG00000063234	2.61559	2.36868e-05	Gpr84
					ENSMUSG00000074971	0.83617	0.0022316	Fibin		ENSMUSG00000026628	2.61821	8.30828e-06	Atf3
					ENSMUSG00000005251	1.17855	0.013735	Ripk4		ENSMUSG00000026548	2.64168	2.34185e-05	Slamf9
					ENSMUSG00000027313	1.98845	1.6812e-35	Chac1		ENSMUSG00000024338	2.65963	7.43195e-16	Psmb8
										ENSMUSG00000015340	2.67285	5.2448e-12	Cybb
										ENSMUSG00000020437	2.80618	8.11006e-12	Myo1g
										ENSMUSG00000027995	2.87674	1.56627e-05	Tlr2
										ENSMUSG00000024737	2.98568	1.25441e-13	Slc15a3
										ENSMUSG00000004707	3.29561	4.76286e-07	Ly9
										ENSMUSG00000000682	3.31507	7.52816e-15	Cd52
										ENSMUSG00000035352	4.02699	3.1484e-18	Ccl12
										ENSMUSG00000038508	4.31149	8.26947e-05	Gdf15
										ENSMUSG00000000982	4.50255	3.88944e-07	Ccl3
										ENSMUSG00000035385	5.02966	1.19147e-06	Ccl2
										ENSMUSG00000042377	5.03298	1.29417e-09	Fam83g
										ENSMUSG00000030789	5.57384	2.2162e-08	Itgax
										ENSMUSG00000018930	5.62279	1.79341e-05	Ccl4
										ENSMUSG00000034855	6.06177	1.8081e-15	Cxcl10
