# Supplementary material for: Molecular basis of neurodegeneration in a mouse model of Polr3-related disease
Source: eLife. 2024 Nov 5;13:RP95314. doi: 10.7554/eLife.95314 (PMC11537486; doi:10.7554/eLife.95314)
Supplement: Supplementary file 3. [file elife-95314-supp3.xlsx]

## Sheet: Legend Table S3
Supplementary File 3. RNAseq analysis of WT and Polr3a-tamKI cerebra at P42. Tabs ordered from left to right contain (i) DESeq2 results for all genes, (ii) all DE genes with padj < 0.05, (iii) ISR gene overlap as defined in Torrence et al (2021) Elife 10, e63326, (iv) ATF4-dependent ISR gene overlap as defined in Torrence et al (2021) Elife 10, e63326, (v), Immune system process GO:0002376 gene o…

## Sheet: DESeq2 P42_Ca
Gene ID	baseMean	log2FoldChange	lfcSE	stat	pvalue	padj	Gene Name
ENSMUSG00000045871	162.202	2.293	0.267847	8.56085	1.12037e-17	1.95729e-13	Slitrk6
ENSMUSG00000019768	525.161	3.44876	0.418789	8.23507	1.79454e-16	1.56753e-12	Esr1
ENSMUSG00000000125	181.439	1.894	0.24868	7.61621	2.61241e-14	1.5213e-10	Wnt3
ENSMUSG00000050315	722.609	2.13667	0.284877	7.50035	6.3649e-14	2.77987e-10	Synpo2
ENSMUSG00000090121	105.658	3.46221	0.489052	7.07942	1.4476e-12	5.05792e-09	Abhd12b
ENSMUSG00000005667	253.055	1.26046	0.203194	6.20326	5.53066e-10	1.61034e-06	Mthfd2
ENSMUSG00000040624	1158.64	1.55108	0.260209	5.96092	2.50827e-09	6.25992e-06	Plekhg1
ENSMUSG00000031297	315.887	1.07507	0.185124	5.80732	6.34796e-09	1.38624e-05	Slc7a3
ENSMUSG00000032776	87.3973	1.33421	0.233908	5.704	1.17025e-08	2.04443e-05	Mctp2
ENSMUSG00000037568	152.225	1.08581	0.18983	5.7199	1.06587e-08	2.04443e-05	Vash2
ENSMUSG00000027860	255.104	1.33398	0.239083	5.57958	2.41107e-08	3.82921e-05	Vangl1
ENSMUSG00000055632	56.0195	1.80764	0.326631	5.53419	3.12678e-08	4.20191e-05	Hmcn2
ENSMUSG00000013076	2166.69	1.30305	0.235024	5.54434	2.9507e-08	4.20191e-05	Amotl1
ENSMUSG00000047281	60.8816	1.62389	0.296423	5.47827	4.29498e-08	5.35952e-05	Sfn
ENSMUSG00000064179	115.274	2.22774	0.407674	5.46451	4.6419e-08	5.40626e-05	Tnnt1
ENSMUSG00000046500	52.6857	2.25199	0.416166	5.41129	6.25732e-08	6.83221e-05	Fam19a4
ENSMUSG00000027313	195.711	1.71203	0.326466	5.24412	1.5703e-07	0.000161372	Chac1
ENSMUSG00000034579	313.095	1.1419	0.222014	5.14336	2.69867e-07	0.000261921	Pla2g3
ENSMUSG00000026475	392.454	1.73726	0.339501	5.11708	3.10295e-07	0.000278322	Rgs16
ENSMUSG00000105843	410.495	1.13939	0.222882	5.11208	3.18628e-07	0.000278322	Gm19439
ENSMUSG00000033721	344.334	1.32885	0.263607	5.04103	4.6303e-07	0.000367688	Vav3
ENSMUSG00000036353	442.319	-0.982401	0.194834	-5.04226	4.60077e-07	0.000367688	P2ry12
ENSMUSG00000032373	498.315	-1.24626	0.250277	-4.97952	6.37428e-07	0.000484168	Car12
ENSMUSG00000011171	69.1287	1.2254	0.247068	4.95976	7.05799e-07	0.000513763	Vipr2
ENSMUSG00000059857	1384.15	1.19166	0.240723	4.95033	7.40864e-07	0.000517716	Ntng1
ENSMUSG00000034990	45.4791	3.31359	0.672349	4.92838	8.29153e-07	0.000538446	Otoa
ENSMUSG00000036181	356.222	0.996526	0.202231	4.92767	8.32172e-07	0.000538446	Hist1h1c
ENSMUSG00000110631	214.132	1.43066	0.291284	4.91157	9.0352e-07	0.000563732	Gm42047
ENSMUSG00000021186	182.603	1.12944	0.232392	4.86007	1.17346e-06	0.000695623	Fbln5
ENSMUSG00000074968	2269.09	-1.74072	0.358427	-4.85654	1.19454e-06	0.000695623	Ano3
ENSMUSG00000020732	239.889	2.00378	0.414774	4.83102	1.35835e-06	0.000765493	Rab37
ENSMUSG00000073418	612.873	0.985235	0.205143	4.80266	1.5657e-06	0.000854773	C4b
ENSMUSG00000019232	1246.47	1.15711	0.247797	4.66958	3.01819e-06	0.00159781	Etnppl
ENSMUSG00000074818	248.952	0.666019	0.14328	4.64837	3.34563e-06	0.0016778	Pdzd7
ENSMUSG00000007682	1672.07	-1.10917	0.238664	-4.64741	3.36135e-06	0.0016778	Dio2
ENSMUSG00000062542	563.771	1.1925	0.257136	4.63764	3.52407e-06	0.00171015	Syt9
ENSMUSG00000069917	19.0513	-3.18748	0.688796	-4.6276	3.69919e-06	0.00174662	Hba-a2
ENSMUSG00000027985	201.579	1.08608	0.236598	4.59039	4.4242e-06	0.00203397	Lef1
ENSMUSG00000027654	95.5475	1.22282	0.266984	4.58013	4.64689e-06	0.00208157	Fam83d
ENSMUSG00000061859	786.544	1.45044	0.317188	4.57282	4.81194e-06	0.00210161	Patj
ENSMUSG00000092627	21.4055	3.06684	0.674752	4.54513	5.49012e-06	0.00233933	D130058E05Rik
ENSMUSG00000047786	613.872	-0.837925	0.184704	-4.53657	5.71753e-06	0.00237822	Lix1
ENSMUSG00000031997	132.138	-1.22533	0.273343	-4.48276	7.3684e-06	0.00299363	Trpc6
ENSMUSG00000018486	50.0434	2.49613	0.558116	4.47243	7.7336e-06	0.00307059	Wnt9b
ENSMUSG00000002910	641.462	1.04333	0.23369	4.46458	8.02247e-06	0.0031145	Arrdc2
ENSMUSG00000034486	56.1481	2.98907	0.674978	4.4284	9.49363e-06	0.00360551	Gbx2
ENSMUSG00000020262	6725.84	0.618959	0.141219	4.38297	1.17072e-05	0.0043516	Adarb1
ENSMUSG00000039910	867.431	0.560411	0.12825	4.36968	1.24429e-05	0.00445831	Cited2
ENSMUSG00000103899	39.3669	-1.33046	0.304551	-4.3686	1.25047e-05	0.00445831	Gm37940
ENSMUSG00000004035	380.539	0.728719	0.167539	4.34956	1.3641e-05	0.00476618	Gstm7
ENSMUSG00000024907	43.8665	2.70407	0.626561	4.31573	1.59077e-05	0.00519001	Gal
ENSMUSG00000021948	2400.64	2.55306	0.591827	4.31387	1.60424e-05	0.00519001	Prkcd
ENSMUSG00000022548	3787.1	0.865778	0.200687	4.31407	1.60278e-05	0.00519001	Apod
ENSMUSG00000071176	1670.31	0.604463	0.139764	4.32489	1.5261e-05	0.00519001	Arhgef10
ENSMUSG00000050234	60.7857	1.12399	0.261302	4.30151	1.6964e-05	0.00538839	Gja4
ENSMUSG00000037727	221.828	3.61995	0.846562	4.27606	1.90228e-05	0.00593443	Avp
ENSMUSG00000050830	241.476	0.794492	0.187603	4.23497	2.28584e-05	0.00700589	Vwc2
ENSMUSG00000030494	188.256	0.880958	0.208599	4.2232	2.40854e-05	0.00725468	Rhpn2
ENSMUSG00000058488	555.074	-1.61411	0.382777	-4.21683	2.47758e-05	0.00733615	Kl
ENSMUSG00000028893	426.813	1.03764	0.247294	4.19598	2.71693e-05	0.00791081	Sesn2
ENSMUSG00000041842	225.453	1.0365	0.249889	4.14785	3.35607e-05	0.00930643	Fhdc1
ENSMUSG00000104362	223.018	-1.11007	0.267405	-4.15126	3.30657e-05	0.00930643	Gm37928
ENSMUSG00000075538	19.7569	-1.91982	0.462321	-4.15257	3.28765e-05	0.00930643	Gm10855
ENSMUSG00000015852	276.435	-0.726652	0.175345	-4.14414	3.41093e-05	0.00931076	Fcrls
ENSMUSG00000024727	50.2854	1.48935	0.360462	4.13178	3.5997e-05	0.00952829	Trpm6
ENSMUSG00000032890	5744.17	0.876819	0.212095	4.13409	3.56368e-05	0.00952829	Rims3
ENSMUSG00000001588	12.2752	3.19662	0.778502	4.10611	4.02375e-05	0.0103375	Acap1
ENSMUSG00000003746	892.075	-0.59512	0.144889	-4.10741	4.00121e-05	0.0103375	Man1a
ENSMUSG00000032238	2637.07	0.675109	0.165385	4.08205	4.46394e-05	0.0111525	Rora
ENSMUSG00000022656	553.022	-0.590684	0.144711	-4.08181	4.46867e-05	0.0111525	Nectin3
ENSMUSG00000116557	50.5636	-1.87193	0.460583	-4.06426	4.81855e-05	0.0118564	AC118542.1
ENSMUSG00000052336	600.762	-0.592098	0.145923	-4.0576	4.95802e-05	0.0120301	Cx3cr1
ENSMUSG00000060639	25.4069	1.64809	0.406567	4.05368	5.04186e-05	0.0120659	Hist1h4i
ENSMUSG00000062760	1722.75	0.663052	0.16405	4.04178	5.30479e-05	0.0125236	Shisal1
ENSMUSG00000044317	135.93	1.0355	0.2567	4.03391	5.48573e-05	0.0127781	Gpr4
ENSMUSG00000085873	77.8221	1.13172	0.28229	4.00908	6.0957e-05	0.0138282	Ttc39aos1
ENSMUSG00000004328	624.317	1.11987	0.279545	4.00606	6.17403e-05	0.0138282	Hif3a
ENSMUSG00000040713	539.062	0.573067	0.142954	4.00876	6.10397e-05	0.0138282	Creg1
ENSMUSG00000031770	1318.25	0.521687	0.130683	3.99201	6.55154e-05	0.014488	Herpud1
ENSMUSG00000029769	1933.08	0.630544	0.158084	3.98867	6.64443e-05	0.0145098	Ccdc136
ENSMUSG00000048540	79.7225	1.50898	0.380134	3.9696	7.19942e-05	0.0147969	Nhlh2
ENSMUSG00000055409	1097.12	0.500732	0.12598	3.97469	7.04705e-05	0.0147969	Nell1
ENSMUSG00000033342	1025.51	-0.691639	0.174211	-3.97013	7.18337e-05	0.0147969	Plppr5
ENSMUSG00000026571	1406.23	-0.76007	0.191407	-3.97097	7.1581e-05	0.0147969	Dcaf6
ENSMUSG00000050549	58.3278	-1.0791	0.271061	-3.98102	6.86204e-05	0.0147969	Fam241a
ENSMUSG00000091712	883.179	0.707544	0.178459	3.96474	7.34757e-05	0.0149258	Sec14l5
ENSMUSG00000066129	5550.95	0.700818	0.178263	3.93136	8.44652e-05	0.016961	Kndc1
ENSMUSG00000022246	251.972	-0.830877	0.211633	-3.92603	8.63577e-05	0.0169848	Rai14
ENSMUSG00000006362	625.45	-0.844344	0.215089	-3.92556	8.65279e-05	0.0169848	Cbfa2t3
ENSMUSG00000041324	260.31	-1.12484	0.28816	-3.9035	9.481e-05	0.0184037	Inhba
ENSMUSG00000030730	30.3513	2.4965	0.641526	3.89149	9.96288e-05	0.0186368	Atp2a1
ENSMUSG00000004098	186.745	1.60682	0.413345	3.88735	0.000101345	0.0186368	Col5a3
ENSMUSG00000044361	25.4065	1.59359	0.408938	3.89689	9.74345e-05	0.0186368	BC024139
ENSMUSG00000007279	71.9295	1.27825	0.328754	3.88817	0.000101003	0.0186368	Scube2
ENSMUSG00000028581	518.735	-0.595543	0.152932	-3.89417	9.85374e-05	0.0186368	Laptm5
ENSMUSG00000041046	319.906	1.61597	0.418156	3.86452	0.00011131	0.0200564	Ramp3
ENSMUSG00000028776	240.58	0.543039	0.140523	3.8644	0.000111361	0.0200564	Tinagl1
ENSMUSG00000032338	398.098	1.21124	0.314339	3.85329	0.000116539	0.0207749	Hcn4
ENSMUSG00000004151	1613.45	-0.472889	0.122898	-3.84781	0.000119179	0.0210309	Etv1
ENSMUSG00000070369	33.5817	1.65226	0.430299	3.83979	0.000123142	0.0215129	Itgad
ENSMUSG00000110408	18.7311	1.90956	0.498057	3.83401	0.000126069	0.0218062	Gm45881
ENSMUSG00000042804	757.606	0.938344	0.245696	3.81913	0.000133925	0.0229379	Gpr153
ENSMUSG00000026827	2331.32	-0.71836	0.188424	-3.81247	0.000137583	0.0233357	Gpd2
ENSMUSG00000004894	999.94	1.32824	0.349052	3.80527	0.000141648	0.0237408	Hapln2
ENSMUSG00000066760	87.7694	0.748106	0.196691	3.80346	0.000142689	0.0237408	Psg16
ENSMUSG00000025370	277.785	-1.02965	0.271373	-3.79422	0.000148106	0.0244096	Cdh9
ENSMUSG00000036098	1938.37	0.778538	0.206156	3.77645	0.000159076	0.0257321	Myrf
ENSMUSG00000069919	111.613	-1.99676	0.528575	-3.77762	0.000158333	0.0257321	Hba-a1
ENSMUSG00000048440	106.145	0.828114	0.220026	3.76371	0.000167414	0.0268323	Cyp4f16
ENSMUSG00000071604	328.198	0.698379	0.185898	3.75678	0.000172115	0.0273349	Fam189a2
ENSMUSG00000020251	167.612	-1.57955	0.421684	-3.7458	0.00017982	0.0283014	Glt8d2
ENSMUSG00000107585	310.262	-0.778677	0.208865	-3.72814	0.0001929	0.030089	3300002P13Rik
ENSMUSG00000074892	1602.92	0.694937	0.186609	3.72403	0.000196071	0.030313	B3galt5
ENSMUSG00000033965	812.232	-0.820671	0.220555	-3.72094	0.000198484	0.0304169	Slc16a2
ENSMUSG00000040723	138.971	0.689114	0.1856	3.7129	0.000204899	0.0308585	Rcsd1
ENSMUSG00000039960	1145.51	0.547492	0.147412	3.71403	0.000203985	0.0308585	Rhou
ENSMUSG00000076441	412.551	0.933641	0.25194	3.70581	0.000210719	0.0314637	Ass1
ENSMUSG00000074673	37.009	1.22922	0.332604	3.69575	0.000219234	0.0322558	Ttll9
ENSMUSG00000024500	1884.77	-0.366436	0.0992225	-3.69307	0.000221563	0.0322558	Ppp2r2b
ENSMUSG00000035152	7640.58	-0.392149	0.106155	-3.69412	0.000220651	0.0322558	Ap2b1
ENSMUSG00000069581	15.8707	2.44414	0.663339	3.6846	0.000229062	0.0326654	Tspear
ENSMUSG00000029596	71.0436	1.46829	0.398604	3.68358	0.000229985	0.0326654	Sdsl
ENSMUSG00000031431	2160.44	0.599286	0.162591	3.68586	0.000227936	0.0326654	Tsc22d3
ENSMUSG00000075289	215.492	0.794368	0.215913	3.67911	0.00023405	0.0327429	Carns1
ENSMUSG00000048251	2209.71	-0.87872	0.238857	-3.67886	0.00023428	0.0327429	Bcl11b
ENSMUSG00000060981	27.7804	1.77117	0.482575	3.67024	0.000242324	0.0330735	Hist1h4h
ENSMUSG00000025207	926.904	0.842029	0.229414	3.67034	0.000242226	0.0330735	Sema4g
ENSMUSG00000021057	2276.01	-1.11698	0.304204	-3.67182	0.000240825	0.0330735	Akap5
ENSMUSG00000002341	4194.59	-0.767866	0.20984	-3.6593	0.000252908	0.033987	Ncan
ENSMUSG00000079436	40.0514	-1.57756	0.430901	-3.66107	0.00025116	0.033987	Kcnj13
ENSMUSG00000029420	2928.55	-0.681755	0.186736	-3.6509	0.000261328	0.0347812	Rimbp2
ENSMUSG00000097282	15.9304	-1.73454	0.475288	-3.64945	0.0002628	0.0347812	5031415H12Rik
ENSMUSG00000048376	253.681	0.828535	0.227195	3.6468	0.00026553	0.0348402	F2r
ENSMUSG00000023942	365.883	0.792533	0.217421	3.64515	0.000267235	0.0348402	Slc29a1
ENSMUSG00000044788	874.772	0.888265	0.243922	3.64159	0.000270956	0.0350638	Fads6
ENSMUSG00000049571	253.925	0.990424	0.272459	3.63513	0.000277839	0.0352653	Cfap46
ENSMUSG00000035681	2874.25	0.400449	0.110181	3.63445	0.00027857	0.0352653	Kcnc2
ENSMUSG00000105352	27.2346	-1.65957	0.456397	-3.63624	0.000276648	0.0352653	C030018K13Rik
ENSMUSG00000035649	1149.61	-0.510783	0.141025	-3.62193	0.000292409	0.036751	Zcchc7
ENSMUSG00000022678	578.138	0.482428	0.133644	3.60979	0.000306441	0.0382394	Nde1
ENSMUSG00000036273	1272.4	-0.957019	0.265257	-3.6079	0.000308685	0.0382462	Lrrk2
ENSMUSG00000109890	38.028	-1.46745	0.407138	-3.6043	0.000312992	0.0385068	AU023762
ENSMUSG00000041801	616.768	1.17513	0.326624	3.59781	0.000320904	0.0386633	Phlda3
ENSMUSG00000020604	534.243	0.725583	0.201626	3.59865	0.00031987	0.0386633	Arsg
ENSMUSG00000024691	32.0393	-1.80181	0.500485	-3.60013	0.000318053	0.0386633	Fam111a
ENSMUSG00000005611	159.565	1.33499	0.371727	3.59132	0.000329003	0.039077	Mrvi1
ENSMUSG00000039450	82.716	1.03044	0.287046	3.5898	0.000330937	0.039077	Dcxr
ENSMUSG00000021228	30.1371	-1.43609	0.400059	-3.58971	0.000331047	0.039077	Acot3
ENSMUSG00000058159	25.359	1.51269	0.424311	3.56505	0.000363784	0.0401015	T2
ENSMUSG00000031492	79.7715	1.02947	0.288967	3.56258	0.000367229	0.0401015	Chrnb3
ENSMUSG00000014846	897.171	0.970892	0.271354	3.57795	0.000346295	0.0401015	Tppp3
ENSMUSG00000059810	647.395	0.893728	0.251372	3.55539	0.000377413	0.0401015	Rgs3
ENSMUSG00000097233	64.7966	0.875668	0.245374	3.56872	0.000358735	0.0401015	Gm17552
ENSMUSG00000030609	379.716	0.724167	0.203582	3.55712	0.00037494	0.0401015	Aen
ENSMUSG00000048677	119.954	0.707086	0.19874	3.55785	0.000373901	0.0401015	Tpcn2
ENSMUSG00000039943	2559.83	0.683738	0.191895	3.56308	0.000366533	0.0401015	Plcb4
ENSMUSG00000045917	311.762	0.678527	0.189965	3.57186	0.000354456	0.0401015	Tmem268
ENSMUSG00000008393	1264.23	0.604748	0.169564	3.56649	0.000361793	0.0401015	Carhsp1
ENSMUSG00000019916	960.303	-0.553727	0.15563	-3.55797	0.00037373	0.0401015	P4ha1
ENSMUSG00000042496	596.261	-0.556638	0.156569	-3.55523	0.000377649	0.0401015	Prdm10
ENSMUSG00000029086	377.15	-0.589261	0.16578	-3.55446	0.000378749	0.0401015	Prom1
ENSMUSG00000039706	691.421	-0.647064	0.181205	-3.5709	0.000355756	0.0401015	Ldb2
ENSMUSG00000030134	3673.91	-0.784497	0.220034	-3.56535	0.000363371	0.0401015	Rasgef1a
ENSMUSG00000015143	1737.85	-0.925525	0.258679	-3.57789	0.000346374	0.0401015	Actn1
ENSMUSG00000108584	15.7394	-1.83923	0.514343	-3.57587	0.000349061	0.0401015	Gm45216
ENSMUSG00000043753	17.8006	1.56897	0.441994	3.54976	0.000385578	0.0405786	Dmrta1
ENSMUSG00000031026	1270.05	0.525939	0.14838	3.54455	0.000393291	0.0411425	Trim66
ENSMUSG00000116029	21.1612	1.67256	0.473089	3.5354	0.000407154	0.0412969	Gm41414
ENSMUSG00000109868	69.2109	1.21136	0.342076	3.5412	0.000398312	0.0412969	Gm39244
ENSMUSG00000032788	2667.96	0.462129	0.130758	3.53424	0.00040895	0.0412969	Pdxk
ENSMUSG00000001833	6599.54	-0.399445	0.11294	-3.5368	0.000405003	0.0412969	Septin7
ENSMUSG00000035513	657.667	-0.741645	0.209716	-3.53642	0.000405582	0.0412969	Ntng2
ENSMUSG00000038115	97.1431	-1.02589	0.289787	-3.54015	0.000399894	0.0412969	Ano2
ENSMUSG00000027634	7131.63	-0.432594	0.122587	-3.52889	0.00041731	0.0418989	Ndrg3
ENSMUSG00000025854	998.181	0.693067	0.196794	3.52178	0.000428656	0.042549	Fam20c
ENSMUSG00000033595	3262.17	0.544931	0.154695	3.52262	0.000427306	0.042549	Lgi3
ENSMUSG00000028977	204.064	0.952241	0.270701	3.51769	0.000435325	0.0427254	Casz1
ENSMUSG00000052848	108.582	-0.863535	0.245461	-3.51801	0.000434789	0.0427254	C130026L21Rik
ENSMUSG00000005447	167.057	1.00415	0.285878	3.5125	0.000443912	0.042916	Pafah1b3
ENSMUSG00000031673	1233.28	-0.524483	0.149337	-3.51207	0.000444636	0.042916	Cdh11
ENSMUSG00000059049	128.111	-0.808514	0.230038	-3.51469	0.000440269	0.042916	Frem1
ENSMUSG00000026564	17.9872	1.68103	0.479217	3.50788	0.000451698	0.0432609	Dusp27
ENSMUSG00000038319	1370.87	0.863432	0.246303	3.50557	0.000455639	0.0432609	Kcnh2
ENSMUSG00000043498	1040.49	-0.742701	0.211842	-3.50593	0.000455017	0.0432609	9330132A10Rik
ENSMUSG00000008575	1843.14	-0.84121	0.240167	-3.5026	0.000460743	0.0435091	Nfib
ENSMUSG00000033453	172.963	0.977151	0.27964	3.49431	0.000475287	0.0446412	Adamts15
ENSMUSG00000055235	45.8504	-1.39477	0.400022	-3.48673	0.00048897	0.0456808	Wdr86
ENSMUSG00000059434	26.8911	2.32606	0.668264	3.48075	0.000500004	0.0460892	Gckr
ENSMUSG00000046338	30.9569	1.47673	0.424338	3.48008	0.000501256	0.0460892	Gpat2
ENSMUSG00000040740	143.421	0.812384	0.233328	3.48173	0.000498186	0.0460892	Slc25a34
ENSMUSG00000026730	1197.19	-1.15147	0.331395	-3.4746	0.000511616	0.0467954	Pter
ENSMUSG00000041660	91.7333	1.17598	0.338728	3.47176	0.000517064	0.0470474	Bbox1
ENSMUSG00000097305	48.5732	1.09914	0.316866	3.46879	0.000522799	0.0473228	Gm17276
ENSMUSG00000021587	1048.93	-0.617774	0.178256	-3.46566	0.00052893	0.0476309	Pcsk1
ENSMUSG00000041789	30.6545	1.81572	0.52461	3.46108	0.000538011	0.0479544	2700046A07Rik
ENSMUSG00000026579	188.701	-1.06883	0.308746	-3.46184	0.000536501	0.0479544	F5
ENSMUSG00000028630	1073.96	-0.818404	0.23663	-3.45858	0.000543031	0.0481561	Dyrk2
ENSMUSG00000029560	291.771	0.76061	0.220506	3.44938	0.000561876	0.0495696	Snx8
ENSMUSG00000039470	1026.43	-0.411031	0.119253	-3.4467	0.000567483	0.0495696	Zdhhc2
ENSMUSG00000033377	319.25	-0.952538	0.276322	-3.4472	0.000566419	0.0495696	Palmd
ENSMUSG00000006218	85.6656	1.42097	0.412469	3.44503	0.00057099	0.0496278	Fam131c
ENSMUSG00000029360	26.2274	-1.36978	0.39787	-3.44278	0.000575762	0.0497948	Gm9754
ENSMUSG00000055471	324.87	0.708252	0.206023	3.43773	0.000586607	0.0504608	Alk
ENSMUSG00000032038	414.557	0.606163	0.176455	3.43523	0.000592044	0.0504608	St3gal4
ENSMUSG00000040118	4604.91	-0.777558	0.22635	-3.4352	0.000592127	0.0504608	Cacna2d1
ENSMUSG00000015757	754.605	-0.440251	0.12828	-3.43194	0.000599271	0.0508217	Ppil4
ENSMUSG00000097729	140.969	0.825294	0.240908	3.42576	0.000613087	0.0517422	2310015A10Rik
ENSMUSG00000030867	35.7974	1.17777	0.344425	3.41954	0.000627275	0.0518002	Plk1
ENSMUSG00000035258	238.035	-1.72147	0.503454	-3.41933	0.000627758	0.0518002	Abi3bp
ENSMUSG00000032842	356.056	0.603915	0.176383	3.42389	0.000617318	0.0518002	Abcc10
ENSMUSG00000039154	461.547	0.910864	0.266415	3.41896	0.000628599	0.0518002	Shd
ENSMUSG00000067873	1304.43	-0.418304	0.122308	-3.42009	0.000625994	0.0518002	Htatsf1
ENSMUSG00000032517	30386.9	0.564018	0.166014	3.39741	0.000680267	0.0557947	Mobp
ENSMUSG00000022066	41.2778	2.63256	0.777802	3.38461	0.000712789	0.0573845	Entpd4b
ENSMUSG00000022468	59.6115	0.876143	0.258615	3.38783	0.000704477	0.0573845	Endou
ENSMUSG00000031511	2667.81	-0.39851	0.1177	-3.38581	0.00070968	0.0573845	Arhgef7
ENSMUSG00000030500	2988.8	1.38157	0.407922	3.38686	0.000706987	0.0573845	Slc17a6
ENSMUSG00000001349	13.0057	1.98924	0.588994	3.37735	0.00073189	0.0575951	Cnn1
ENSMUSG00000031253	32.3668	1.09495	0.323839	3.38117	0.00072178	0.0575951	Srpx2
ENSMUSG00000051159	64.7051	1.03033	0.305058	3.37748	0.000731526	0.0575951	Cited1
ENSMUSG00000022372	136.405	-0.914284	0.270607	-3.37864	0.000728464	0.0575951	Sla
ENSMUSG00000031819	1348.41	0.30135	0.0891832	3.379	0.000727509	0.0575951	Emc8
ENSMUSG00000020868	670.809	0.840176	0.249038	3.37369	0.000741685	0.0581042	Xylt2
ENSMUSG00000090799	266.787	0.883115	0.261985	3.37086	0.000749342	0.0582749	Klhl33
ENSMUSG00000026782	3815.91	-0.623491	0.184989	-3.37042	0.000750536	0.0582749	Abi2
ENSMUSG00000011148	531.899	0.804287	0.238827	3.36766	0.000758104	0.0586003	Adssl1
ENSMUSG00000023067	854.034	1.11015	0.330006	3.36403	0.000768143	0.0586003	Cdkn1a
ENSMUSG00000025986	3979.97	-0.801894	0.238346	-3.36442	0.000767055	0.0586003	Slc39a10
ENSMUSG00000018593	10784.5	1.28521	0.381919	3.36515	0.000765033	0.0586003	Sparc
ENSMUSG00000112690	18.9173	1.60139	0.476416	3.36134	0.000775652	0.0588297	Gm2446
ENSMUSG00000049630	599.347	-1.04142	0.309896	-3.36055	0.000777885	0.0588297	C1ql3
ENSMUSG00000097160	12.8532	-2.38973	0.712586	-3.3536	0.000797672	0.0593896	A630072L19Rik
ENSMUSG00000089847	160.03	0.586244	0.174832	3.35318	0.000798887	0.0593896	Timm10b
ENSMUSG00000023939	167.666	0.670606	0.199983	3.35332	0.00079848	0.0593896	Mrpl14
ENSMUSG00000024053	190.548	1.05049	0.313213	3.3539	0.000796806	0.0593896	Emilin2
ENSMUSG00000037990	673.707	-0.861672	0.258006	-3.33974	0.00083857	0.0620755	Sh3rf3
ENSMUSG00000086290	180.213	0.688931	0.207011	3.328	0.000874716	0.064478	Snhg12
ENSMUSG00000060548	959.137	-0.561952	0.169207	-3.32109	0.000896676	0.0658191	Tnfrsf19
ENSMUSG00000026972	158.934	0.711562	0.214451	3.31806	0.000906441	0.0662574	Arrdc1
ENSMUSG00000032624	874.942	-0.464893	0.140286	-3.3139	0.000920058	0.0669726	Eml4
ENSMUSG00000028661	346.327	0.924536	0.279364	3.30943	0.000934871	0.0676431	Epha8
ENSMUSG00000020102	1008.86	-1.00083	0.302478	-3.30879	0.000937013	0.0676431	Slc16a7
ENSMUSG00000024713	254.404	-0.645625	0.195528	-3.30196	0.000960101	0.0682117	Pcsk5
ENSMUSG00000035615	410.428	0.586587	0.177612	3.30263	0.000957832	0.0682117	Frmpd1
ENSMUSG00000024587	3775.85	0.404412	0.122491	3.30155	0.000961508	0.0682117	Nars
ENSMUSG00000007617	4014.87	-1.117	0.338411	-3.30071	0.000964412	0.0682117	Homer1
ENSMUSG00000052572	7995.14	-0.70767	0.214375	-3.30109	0.00096311	0.0682117	Dlg2
ENSMUSG00000059173	2690.05	-1.21549	0.368676	-3.2969	0.000977569	0.0688634	Pde1a
ENSMUSG00000041309	331.221	1.03325	0.313749	3.29326	0.000990342	0.0694831	Nkx6-2
ENSMUSG00000032705	2056.48	-0.562335	0.170914	-3.29017	0.00100127	0.0699687	Exd2
ENSMUSG00000039735	2906.25	-0.65796	0.200861	-3.2757	0.00105399	0.073068	Fnbp1l
ENSMUSG00000036095	3693.31	-0.909648	0.277614	-3.27667	0.00105039	0.073068	Dgkb
ENSMUSG00000036120	187.671	0.547086	0.167234	3.27137	0.00107026	0.0739029	Rfxank
ENSMUSG00000031647	1147.42	-0.716301	0.219267	-3.26679	0.00108773	0.0748133	Mfap3l
ENSMUSG00000030592	643.238	-1.05277	0.322525	-3.26416	0.00109788	0.0752156	Ryr1
ENSMUSG00000085024	15.7359	1.60297	0.493424	3.24867	0.00115945	0.0753127	C230035I16Rik
ENSMUSG00000108920	23.4487	-1.68858	0.518799	-3.25478	0.00113479	0.0753127	Gm44678
ENSMUSG00000030786	71.9575	-0.816882	0.250669	-3.25881	0.00111879	0.0753127	Itgam
ENSMUSG00000055723	247.121	-0.68467	0.210147	-3.25805	0.00112179	0.0753127	Rras2
ENSMUSG00000049892	354.699	1.08666	0.33413	3.25222	0.00114508	0.0753127	Rasd1
ENSMUSG00000015568	373.088	-1.03521	0.318136	-3.25397	0.00113804	0.0753127	Lpl
ENSMUSG00000036959	574.565	-0.521525	0.160289	-3.25366	0.00113929	0.0753127	Bcorl1
ENSMUSG00000047787	751.914	-0.418277	0.128611	-3.25228	0.00114484	0.0753127	Flrt1
ENSMUSG00000030235	878.385	-0.605339	0.186053	-3.25359	0.00113958	0.0753127	Slco1c1
ENSMUSG00000034993	1062.99	0.833929	0.256569	3.25031	0.00115281	0.0753127	Vat1
ENSMUSG00000054408	1271.32	-0.599772	0.1846	-3.24904	0.00115793	0.0753127	Spcs3
ENSMUSG00000056296	1405.84	-0.711966	0.218415	-3.25969	0.00111533	0.0753127	Synpr
ENSMUSG00000040929	1450.82	-0.883018	0.271813	-3.24862	0.00115965	0.0753127	Rfx3
ENSMUSG00000004558	14157.3	0.49402	0.151452	3.2619	0.00110667	0.0753127	Ndrg2
ENSMUSG00000102729	137.648	-0.936417	0.288577	-3.24495	0.00117473	0.0760094	Gm32444
ENSMUSG00000086224	15.2658	1.78031	0.54935	3.24076	0.00119213	0.0766706	2700069I18Rik
ENSMUSG00000029516	4978.86	0.529723	0.163476	3.24037	0.00119373	0.0766706	Cit
ENSMUSG00000027833	389.365	2.46988	0.763756	3.23387	0.00122126	0.0781519	Shox2
ENSMUSG00000104868	178.275	-1.04796	0.325056	-3.22395	0.00126435	0.0798631	Gm9954
ENSMUSG00000063889	265.702	-0.477852	0.148296	-3.22228	0.00127174	0.0798631	Crem
ENSMUSG00000021613	459.602	-0.630048	0.195579	-3.22145	0.00127543	0.0798631	Hapln1
ENSMUSG00000073982	539.742	0.618656	0.19175	3.22637	0.00125372	0.0798631	Rhog
ENSMUSG00000060257	605.916	0.652832	0.20264	3.22163	0.00127462	0.0798631	Scrt2
ENSMUSG00000042155	1084.22	-0.612142	0.189839	-3.22453	0.0012618	0.0798631	Klhl23
ENSMUSG00000041144	211.541	0.803314	0.249713	3.21695	0.00129559	0.0798651	Dnah7b
ENSMUSG00000048332	482.778	0.632538	0.196725	3.21534	0.00130289	0.0798651	Lhfp
ENSMUSG00000026767	708.69	-0.355533	0.110566	-3.21556	0.0013019	0.0798651	Mindy3
ENSMUSG00000064127	1842.78	-0.670188	0.208358	-3.21652	0.00129757	0.0798651	Med14
ENSMUSG00000052928	1951.02	0.518064	0.161068	3.21643	0.00129795	0.0798651	Ctif
ENSMUSG00000044288	3118.74	-0.67416	0.209516	-3.21771	0.00129221	0.0798651	Cnr1
ENSMUSG00000045087	504.725	0.792401	0.246744	3.21144	0.00132074	0.0803946	S1pr5
ENSMUSG00000030168	1828.19	0.482692	0.150267	3.21223	0.00131708	0.0803946	Adipor2
ENSMUSG00000003657	1383.9	1.2981	0.40474	3.20724	0.00134014	0.0810113	Calb2
ENSMUSG00000026872	2790.31	-0.704846	0.219712	-3.20805	0.00133637	0.0810113	Zeb2
ENSMUSG00000038764	1759.78	0.681129	0.212466	3.20583	0.00134673	0.0811289	Ptpn3
ENSMUSG00000020085	155.087	0.632457	0.197457	3.20301	0.00135999	0.0811738	Aifm2
ENSMUSG00000032586	454.02	-0.690656	0.215648	-3.20271	0.00136142	0.0811738	Traip
ENSMUSG00000038335	668.428	-0.498576	0.155603	-3.20416	0.00135459	0.0811738	Tsr1
ENSMUSG00000085779	100.027	-0.704855	0.220335	-3.19902	0.00137898	0.0817668	Atcayos
ENSMUSG00000026721	2727.69	-0.557162	0.174187	-3.19865	0.00138072	0.0817668	Rabgap1l
ENSMUSG00000083811	17.6305	-1.53026	0.478671	-3.19688	0.00138922	0.0819924	Gm13071
ENSMUSG00000058624	4282.22	-1.0592	0.331479	-3.19537	0.00139651	0.0821448	Gda
ENSMUSG00000045671	2012.44	-0.505639	0.158401	-3.19215	0.0014122	0.082512	Spred2
ENSMUSG00000021097	4155.36	0.447278	0.140107	3.1924	0.00141094	0.082512	Clmn
ENSMUSG00000071531	148.304	1.22977	0.385468	3.19033	0.00142113	0.0826871	Gprin2
ENSMUSG00000068566	1140.15	-0.48824	0.153072	-3.18961	0.00142466	0.0826871	Myadm
ENSMUSG00000029759	48.1908	-1.0817	0.339336	-3.18768	0.00143418	0.0829642	Pon3
ENSMUSG00000036800	1562.24	-0.663703	0.208291	-3.18642	0.00144047	0.0830529	Fam135b
ENSMUSG00000068874	153.037	0.913565	0.287035	3.18276	0.00145876	0.0836916	Selenbp1
ENSMUSG00000045838	181.798	0.713704	0.224377	3.18082	0.00146857	0.0836916	Ccdc9b
ENSMUSG00000055897	531.323	0.55368	0.174091	3.1804	0.00147071	0.0836916	Ppp4r1l-ps
ENSMUSG00000037771	2340.47	0.517156	0.162514	3.18222	0.00146152	0.0836916	Slc32a1
ENSMUSG00000026421	4557.24	0.467373	0.147007	3.17925	0.00147656	0.0837516	Csrp1
ENSMUSG00000050910	752.303	0.550184	0.173564	3.16992	0.0015248	0.0862077	Cdr2l
ENSMUSG00000042638	29.5875	1.64576	0.519749	3.16645	0.00154311	0.0866052	Gucy2c
ENSMUSG00000074170	170.146	0.99308	0.313761	3.16508	0.00155039	0.0866052	Plekhf1
ENSMUSG00000031283	173.914	-1.29239	0.408306	-3.16525	0.00154952	0.0866052	Chrdl1
ENSMUSG00000059991	1015.27	-0.696652	0.220187	-3.16392	0.00155661	0.0866052	Nptx2
ENSMUSG00000062190	1494.84	-0.531934	0.168092	-3.16453	0.00155332	0.0866052	Lancl2
ENSMUSG00000029376	229.946	0.749532	0.237017	3.16235	0.00156501	0.0867958	Mthfd2l
ENSMUSG00000060787	12.5053	-2.51568	0.796958	-3.1566	0.0015962	0.0875087	Olfr464
ENSMUSG00000028150	56.325	1.0177	0.322347	3.15716	0.00159313	0.0875087	Rorc
ENSMUSG00000003948	2498.07	-0.840173	0.265972	-3.15888	0.00158374	0.0875087	Mmd
ENSMUSG00000026463	5726.23	-0.875956	0.277527	-3.15629	0.0015979	0.0875087	Atp2b4
ENSMUSG00000086665	13.4676	1.68174	0.533724	3.15095	0.0016274	0.088846	Gm13067
ENSMUSG00000103663	34.7128	-1.3994	0.445237	-3.14304	0.00167203	0.0894976	2900037B21Rik
ENSMUSG00000029026	47.4029	1.45546	0.463124	3.1427	0.00167395	0.0894976	Trp73
ENSMUSG00000114019	381.862	-0.981607	0.312399	-3.14216	0.00167707	0.0894976	Gm47155
ENSMUSG00000024944	741.898	0.548423	0.174532	3.14225	0.00167655	0.0894976	Arl2
ENSMUSG00000037003	787.97	0.449745	0.143031	3.14439	0.00166436	0.0894976	Tns2
ENSMUSG00000021929	1780.52	-0.520804	0.165449	-3.14783	0.00164488	0.0894976	Kpna3
ENSMUSG00000029838	4393.99	-0.561567	0.178681	-3.14285	0.00167311	0.0894976	Ptn
ENSMUSG00000030729	8061.89	-0.75622	0.240712	-3.14159	0.00168032	0.0894976	Pgm2l1
ENSMUSG00000039395	136.959	0.96688	0.308003	3.1392	0.00169413	0.089686	Mreg
ENSMUSG00000057751	188.406	0.875554	0.278899	3.13933	0.00169337	0.089686	Megf6
ENSMUSG00000078670	341.486	-0.465032	0.148216	-3.13754	0.00170374	0.0899227	Fam174b
ENSMUSG00000038119	275.255	-0.466247	0.148854	-3.13224	0.00173478	0.0900877	Cdon
ENSMUSG00000074264	432.036	0.699241	0.22303	3.13519	0.0017174	0.0900877	Amy1
ENSMUSG00000035824	584.813	0.479422	0.153128	3.13086	0.00174297	0.0900877	Tk2
ENSMUSG00000031618	921.369	-0.513126	0.16368	-3.13494	0.00171891	0.0900877	Nr3c2
ENSMUSG00000041923	1517.33	-0.774919	0.24737	-3.13264	0.00173244	0.0900877	Nol4
ENSMUSG00000021670	2132.1	-0.583564	0.186267	-3.13294	0.00173063	0.0900877	Hmgcr
ENSMUSG00000009013	2889.57	-0.497577	0.158912	-3.13116	0.0017412	0.0900877	Dynll1
ENSMUSG00000025408	372.833	0.805025	0.257574	3.12541	0.00177555	0.0914035	Ddit3
ENSMUSG00000024642	1145.6	-0.463315	0.148267	-3.12486	0.00177889	0.0914035	Tle4
ENSMUSG00000106951	71.4095	0.774278	0.248242	3.11905	0.00181436	0.0929525	5930430L01Rik
ENSMUSG00000021676	549.39	-0.98472	0.316053	-3.11568	0.00183524	0.0937473	Iqgap2
ENSMUSG00000037086	19.79	-1.92437	0.618674	-3.11047	0.00186787	0.0951363	Prr32
ENSMUSG00000074252	66.2212	0.816992	0.262863	3.10805	0.00188325	0.0951953	Gm10654
ENSMUSG00000023249	106.264	0.67568	0.217358	3.1086	0.00187977	0.0951953	Parp3
ENSMUSG00000030785	137.523	0.894527	0.28784	3.10772	0.00188538	0.0951953	Cox6a2
ENSMUSG00000046207	59.3878	-0.916411	0.295023	-3.10623	0.00189486	0.0953984	Pik3r6
ENSMUSG00000096257	21.9767	1.83181	0.590067	3.10441	0.00190657	0.0957118	Ccer2
ENSMUSG00000035954	3199.6	-0.623883	0.201049	-3.10314	0.00191476	0.0958478	Dock4
ENSMUSG00000015053	181.647	0.856568	0.276348	3.0996	0.00193785	0.0964509	Gata2
ENSMUSG00000008318	395.803	0.809497	0.261152	3.09972	0.00193704	0.0964509	Relt
ENSMUSG00000030657	1472.69	-0.543255	0.175418	-3.09692	0.0019554	0.097048	Xylt1
ENSMUSG00000041180	394.215	-0.509688	0.164771	-3.09332	0.00197932	0.0979566	Hectd2
ENSMUSG00000032570	2833.58	-0.409204	0.132323	-3.09246	0.00198502	0.0979614	Atp2c1
ENSMUSG00000031433	163.8	-0.576365	0.186463	-3.09105	0.00199452	0.0981527	Rbm41
ENSMUSG00000032715	24.1903	2.03769	0.660248	3.08625	0.00202697	0.0983643	Trib3
ENSMUSG00000069170	90.4558	0.693581	0.224654	3.08732	0.00201969	0.0983643	Adgrv1
ENSMUSG00000034520	153.624	0.561264	0.181769	3.08778	0.00201656	0.0983643	Gjc1
ENSMUSG00000031209	278.711	0.85846	0.278135	3.08648	0.00202538	0.0983643	Heph
ENSMUSG00000036790	692.622	-0.680637	0.220374	-3.08855	0.00201134	0.0983643	Slitrk2
ENSMUSG00000020674	1597.65	-0.657739	0.213196	-3.08513	0.0020346	0.0984611	Pxdn
ENSMUSG00000027583	217.415	-0.609682	0.197771	-3.08276	0.0020509	0.0989758	Zbtb46
ENSMUSG00000004110	8286.61	-0.714696	0.231931	-3.0815	0.00205961	0.0991221	Cacna1e
ENSMUSG00000113184	469.98	-0.415838	0.135013	-3.08	0.00207003	0.0993501	AC125351.1
ENSMUSG00000097610	37.2691	-1.13111	0.367422	-3.07851	0.00208037	0.0995729	A930012L18Rik
ENSMUSG00000059146	4571.32	-0.442521	0.143933	-3.07448	0.00210867	0.100651	Ntrk3
ENSMUSG00000047205	641.684	-0.754976	0.245753	-3.07209	0.00212564	0.101185	Dusp18
ENSMUSG00000031847	168.829	-0.797754	0.259897	-3.06951	0.00214412	0.101788	1700030J22Rik
ENSMUSG00000090061	942.073	-0.767123	0.250118	-3.06705	0.00216185	0.102351	Nwd2
ENSMUSG00000078963	29.8487	1.09807	0.358616	3.06195	0.00219898	0.102764	Hsbp1l1
ENSMUSG00000067203	30.3151	1.27752	0.417015	3.06349	0.00218771	0.102764	H2-K2
ENSMUSG00000097350	72.8105	0.958257	0.313539	3.05626	0.00224116	0.102764	4732491K20Rik
ENSMUSG00000047643	150.356	-0.70423	0.230392	-3.05667	0.00223814	0.102764	Gm5454
ENSMUSG00000043165	164.864	0.810308	0.264423	3.06444	0.00218076	0.102764	Lor
ENSMUSG00000021904	165.215	0.691474	0.22577	3.06273	0.00219328	0.102764	Sema3g
ENSMUSG00000034255	398.439	0.552102	0.180388	3.06063	0.00220871	0.102764	Arhgap27
ENSMUSG00000033454	482.215	-0.527768	0.172649	-3.05688	0.00223656	0.102764	Zbtb1
ENSMUSG00000047496	650.132	0.735259	0.240451	3.05784	0.00222938	0.102764	Rnf152
ENSMUSG00000021224	819.233	-0.633232	0.206867	-3.06106	0.00220555	0.102764	Numb
ENSMUSG00000034235	2218.29	0.377209	0.123312	3.05899	0.00222086	0.102764	Usp54
ENSMUSG00000051359	7455.61	-0.568676	0.18583	-3.06019	0.00221194	0.102764	Ncald
ENSMUSG00000024985	1140.64	1.81509	0.594161	3.05488	0.00225154	0.10297	Tcf7l2
ENSMUSG00000111950	12.7636	1.8623	0.611437	3.04578	0.00232079	0.105393	Gm48893
ENSMUSG00000109239	28.3446	-1.34257	0.440945	-3.04476	0.00232865	0.105393	Gm45176
ENSMUSG00000050919	179.581	-0.74439	0.244473	-3.04487	0.00232779	0.105393	Zfp366
ENSMUSG00000024811	3523.3	-0.501313	0.16459	-3.04583	0.00232041	0.105393	Tnks2
ENSMUSG00000097929	557.555	0.997598	0.327971	3.04173	0.00235223	0.106185	Tunar
ENSMUSG00000101840	28.6795	-1.20858	0.397452	-3.04082	0.00235934	0.106193	Gm28294
ENSMUSG00000063873	3022.25	0.310085	0.101997	3.04016	0.00236456	0.106193	Slc24a3
ENSMUSG00000100980	24.0445	-1.41891	0.466952	-3.03867	0.00237623	0.106443	Gm29100
ENSMUSG00000026765	252.759	0.555993	0.183248	3.0341	0.00241251	0.107262	Lypd6b
ENSMUSG00000053411	1076.62	0.58918	0.194189	3.03406	0.00241289	0.107262	Cbx7
ENSMUSG00000057134	1420.29	0.334555	0.110295	3.03329	0.00241907	0.107262	Ado
ENSMUSG00000027660	1800.12	-0.662102	0.218263	-3.0335	0.00241732	0.107262	Skil
ENSMUSG00000001827	74.0886	-1.53775	0.507448	-3.03036	0.00244262	0.107699	Folr1
ENSMUSG00000032679	187.017	0.716625	0.236516	3.02992	0.00244618	0.107699	Cd59a
ENSMUSG00000078532	493.995	0.558591	0.184414	3.02901	0.00245359	0.107699	Nkain1
ENSMUSG00000009216	1803.47	-0.777772	0.256746	-3.02935	0.00245084	0.107699	Fam163b
ENSMUSG00000029797	201.712	1.43482	0.474043	3.02678	0.00247172	0.108083	Sspo
ENSMUSG00000028042	499.479	0.817698	0.270299	3.02516	0.00248498	0.108083	Zbtb7b
ENSMUSG00000025889	1917.34	-0.739838	0.244466	-3.02634	0.0024753	0.108083	Snca
ENSMUSG00000021140	3520.93	-0.355582	0.117551	-3.02491	0.00248708	0.108083	Pcnx
ENSMUSG00000020538	1399.6	0.681316	0.225464	3.02184	0.00251246	0.108871	Srebf1
ENSMUSG00000019970	3882.43	0.675045	0.223436	3.02121	0.00251768	0.108871	Sgk1
ENSMUSG00000037868	146.419	-1.60955	0.53317	-3.01882	0.00253762	0.109462	Egr2
ENSMUSG00000007476	301.652	0.669644	0.222162	3.01421	0.00257647	0.1095	Lrrc8a
ENSMUSG00000029625	444.29	0.474995	0.157534	3.0152	0.00256812	0.1095	Cpsf4
ENSMUSG00000028673	490.115	0.441204	0.146408	3.01352	0.00258237	0.1095	Fuca1
ENSMUSG00000074575	645.564	-0.943098	0.312764	-3.01537	0.00256666	0.1095	Kcng1
ENSMUSG00000059361	1682.28	0.845411	0.280438	3.01461	0.00257311	0.1095	Nrsn2
ENSMUSG00000040640	3143.98	-0.812136	0.269272	-3.01605	0.00256094	0.1095	Erc2
ENSMUSG00000068739	3554.35	0.411234	0.136402	3.01486	0.00257098	0.1095	Sars
ENSMUSG00000021260	319.529	0.499429	0.16581	3.01206	0.00259483	0.109762	Hhipl1
ENSMUSG00000023328	2274.92	0.778507	0.258614	3.0103	0.0026099	0.110133	Ache
ENSMUSG00000022537	1446.32	-0.615294	0.204701	-3.00582	0.00264868	0.111454	Tmem44
ENSMUSG00000024621	1621.39	-0.345783	0.115061	-3.00521	0.00265398	0.111454	Csf1r
ENSMUSG00000101693	59.928	1.31153	0.436566	3.00419	0.00266291	0.111561	Gm19461
ENSMUSG00000050334	691.082	-0.595489	0.198387	-3.00166	0.00268511	0.111998	C130071C03Rik
ENSMUSG00000027366	1140.01	-0.484894	0.161548	-3.00154	0.00268616	0.111998	Sppl2a
ENSMUSG00000052305	131.098	-1.62112	0.540423	-2.99973	0.00270219	0.112398	Hbb-bs
ENSMUSG00000032666	1828.37	-0.407739	0.136048	-2.99703	0.00272627	0.113131	1700025G04Rik
ENSMUSG00000032595	27.2952	1.20355	0.401693	2.9962	0.00273364	0.113154	Cdhr4
ENSMUSG00000008028	47.0995	0.761417	0.254247	2.9948	0.00274626	0.113154	1700008O03Rik
ENSMUSG00000071454	1076.51	-0.488992	0.163258	-2.99522	0.0027425	0.113154	Dtnb
ENSMUSG00000029868	112.399	-0.915348	0.306128	-2.99008	0.00278904	0.113258	Trpv6
ENSMUSG00000005148	211.71	-0.697751	0.233399	-2.98952	0.00279416	0.113258	Klf5
ENSMUSG00000097960	220.874	1.08424	0.362626	2.98996	0.00279015	0.113258	A330074K22Rik
ENSMUSG00000034209	313.584	-1.20386	0.402551	-2.99057	0.00278454	0.113258	Rasl10a
ENSMUSG00000075033	558.893	0.552872	0.18475	2.99253	0.00276672	0.113258	Nxpe3
ENSMUSG00000068015	614.237	0.551025	0.184095	2.99316	0.00276102	0.113258	Lrch1
ENSMUSG00000021313	4908.4	-0.550055	0.183897	-2.99111	0.00277966	0.113258	Ryr2
ENSMUSG00000052560	337.929	-0.681174	0.228066	-2.98675	0.00281962	0.113499	Cpne8
ENSMUSG00000025427	1472.39	-0.686986	0.229981	-2.98714	0.002816	0.113499	Rnf165
ENSMUSG00000076439	1818.41	0.631819	0.211453	2.98799	0.00280816	0.113499	Mog
ENSMUSG00000040997	1258.64	0.419707	0.140592	2.98529	0.0028331	0.11378	Abhd4
ENSMUSG00000038872	904.463	1.06507	0.356943	2.98387	0.00284628	0.114047	Zfhx3
ENSMUSG00000061411	1248.94	-0.507192	0.170109	-2.98158	0.00286767	0.114641	Nol4l
ENSMUSG00000036819	708.749	-0.353284	0.118553	-2.97996	0.00288286	0.114985	Jmjd4
ENSMUSG00000020737	632.08	-0.48077	0.161374	-2.97923	0.00288976	0.114998	Jpt1
ENSMUSG00000031497	56.0727	1.14782	0.385693	2.976	0.00292033	0.11595	Tnfsf13b
ENSMUSG00000043924	25.7393	1.45838	0.490495	2.97329	0.00294626	0.116451	Ncmap
ENSMUSG00000031137	2243.36	-0.541236	0.18203	-2.97333	0.00294587	0.116451	Fgf13
ENSMUSG00000009281	64.7227	1.09463	0.368478	2.97068	0.00297144	0.117181	Rarres2
ENSMUSG00000099760	37.177	-1.0574	0.356304	-2.96769	0.00300049	0.117298	Gm28800
ENSMUSG00000115529	150.036	-0.579182	0.195074	-2.96904	0.0029873	0.117298	9630013A20Rik
ENSMUSG00000049555	171.685	1.13106	0.381399	2.96555	0.00302142	0.117298	Tmie
ENSMUSG00000028613	2033.58	-0.306722	0.103387	-2.96673	0.00300985	0.117298	Lrp8
ENSMUSG00000038014	3626.32	-0.417721	0.140841	-2.96592	0.00301783	0.117298	Fam120a
ENSMUSG00000067336	5256.66	-0.580218	0.195543	-2.96721	0.00300513	0.117298	Bmpr2
ENSMUSG00000034636	5710.04	-0.368911	0.124392	-2.96571	0.00301982	0.117298	Zyg11b
ENSMUSG00000028883	489.454	-1.04356	0.352341	-2.9618	0.00305845	0.118472	Sema3a
ENSMUSG00000090063	343.549	-0.945419	0.31939	-2.96008	0.00307561	0.118874	Dlx6os1
ENSMUSG00000040690	570.18	0.955762	0.322972	2.95927	0.0030837	0.118923	Col16a1
ENSMUSG00000087380	171.268	-0.737793	0.2496	-2.9559	0.00311757	0.119964	2210408F21Rik
ENSMUSG00000053192	3798.4	-0.326701	0.110565	-2.95483	0.00312844	0.120118	Mllt11
ENSMUSG00000021575	16.3518	1.23727	0.419249	2.95115	0.00316589	0.120235	Ahrr
ENSMUSG00000044434	55.1763	1.38661	0.469591	2.9528	0.00314901	0.120235	Gm9791
ENSMUSG00000047230	73.6756	-1.32105	0.447553	-2.95173	0.00316001	0.120235	Cldn2
ENSMUSG00000089706	211.029	-1.04716	0.354629	-2.95284	0.00314868	0.120235	B230216N24Rik
ENSMUSG00000024431	1857.25	-0.463915	0.157162	-2.95182	0.00315906	0.120235	Nr3c1
ENSMUSG00000019961	772.413	0.337909	0.114531	2.95037	0.00317397	0.12028	Tmpo
ENSMUSG00000038637	88.3818	0.775675	0.263068	2.94858	0.00319242	0.120417	Lrrc56
ENSMUSG00000074811	123.625	0.856121	0.290471	2.94735	0.00320509	0.120417	Hps6
ENSMUSG00000004952	168.111	0.944011	0.320288	2.94738	0.00320475	0.120417	Rasa4
ENSMUSG00000066438	203.361	1.27759	0.433662	2.94606	0.00321852	0.120417	Plekhd1
ENSMUSG00000014599	472.01	0.456205	0.154921	2.94476	0.00323202	0.120417	Csf1
ENSMUSG00000028341	771.073	-0.970501	0.329576	-2.9447	0.00323271	0.120417	Nr4a3
ENSMUSG00000064225	1671.25	-0.447666	0.151889	-2.94733	0.00320534	0.120417	Paqr9
ENSMUSG00000027858	4476.21	0.422794	0.143534	2.94561	0.00322315	0.120417	Tspan2
ENSMUSG00000093565	14.3721	1.63939	0.557791	2.93908	0.00329188	0.121279	Rab26os
ENSMUSG00000035021	81.9618	-1.04504	0.3555	-2.93963	0.003286	0.121279	Baz1a
ENSMUSG00000043432	117.049	0.616021	0.209634	2.93855	0.00329752	0.121279	Leng9
ENSMUSG00000015217	344.073	0.478523	0.16279	2.93952	0.0032872	0.121279	Hmgb3
ENSMUSG00000021779	980.475	-0.733306	0.249327	-2.94115	0.00327001	0.121279	Thrb
ENSMUSG00000030268	2729.46	0.523334	0.177931	2.94121	0.00326931	0.121279	Bcat1
ENSMUSG00000009633	57.5533	0.854891	0.291197	2.93578	0.00332709	0.121962	G0s2
ENSMUSG00000025885	884.112	-0.772673	0.263216	-2.9355	0.00333005	0.121962	Myo5b
ENSMUSG00000052364	1043.28	0.936098	0.319248	2.93219	0.00336576	0.123012	B630019K06Rik
ENSMUSG00000021255	95.5611	1.0012	0.342198	2.92581	0.00343566	0.123356	Esrrb
ENSMUSG00000063445	222.866	0.619856	0.211655	2.92861	0.00340477	0.123356	Nmral1
ENSMUSG00000026307	270.452	0.441162	0.151047	2.9207	0.0034925	0.123356	Scly
ENSMUSG00000046805	378.818	-0.475947	0.162916	-2.92142	0.00348443	0.123356	Mpeg1
ENSMUSG00000053799	573.863	-0.615973	0.210765	-2.92255	0.00347173	0.123356	Exoc6
ENSMUSG00000036304	624.388	-0.817491	0.279683	-2.92292	0.00346764	0.123356	Zdhhc23
ENSMUSG00000033685	701.107	0.49145	0.168184	2.92209	0.00347686	0.123356	Ucp2
ENSMUSG00000045193	1063.61	0.520393	0.177682	2.92879	0.00340279	0.123356	Cirbp
ENSMUSG00000000560	1223.52	-0.668591	0.228857	-2.92143	0.00348423	0.123356	Gabra2
ENSMUSG00000027577	1273.99	0.547819	0.187292	2.92494	0.00344521	0.123356	Chrna4
ENSMUSG00000032402	1364.46	-0.700052	0.239306	-2.92534	0.0034408	0.123356	Smad3
ENSMUSG00000050321	1449.12	-0.868505	0.296388	-2.9303	0.00338638	0.123356	Neto1
ENSMUSG00000028580	2313.72	-0.425567	0.145383	-2.92721	0.00342015	0.123356	Pum1
ENSMUSG00000027951	3810.89	0.293676	0.100338	2.92687	0.00342395	0.123356	Adar
ENSMUSG00000037625	4294.8	0.566201	0.193802	2.92155	0.00348296	0.123356	Cldn11
ENSMUSG00000030307	7201.7	1.01753	0.348106	2.92304	0.00346629	0.123356	Slc6a11
ENSMUSG00000046093	14393.5	-0.96652	0.330948	-2.92045	0.00349522	0.123356	Hpcal4
ENSMUSG00000001300	1073.05	-0.629038	0.215441	-2.91977	0.00350291	0.123379	Efnb2
ENSMUSG00000028247	277.424	0.439583	0.150619	2.91851	0.00351714	0.123631	Coq3
ENSMUSG00000029359	551.694	-0.704863	0.241629	-2.91713	0.00353272	0.123929	Tesc
ENSMUSG00000106321	19.2443	-1.78684	0.613541	-2.91234	0.0035873	0.125591	Gm43674
ENSMUSG00000027002	11160.5	-0.542658	0.186383	-2.91152	0.00359674	0.12567	Nckap1
ENSMUSG00000002771	736.245	0.993195	0.34125	2.91046	0.00360896	0.125845	Grin2d
ENSMUSG00000074506	70.2339	-1.86005	0.63946	-2.90878	0.0036284	0.126271	Gm10705
ENSMUSG00000038141	1233.89	-0.296365	0.101988	-2.90588	0.00366227	0.126944	Tmem181a
ENSMUSG00000020173	1569.51	-0.709683	0.244203	-2.90612	0.00365947	0.126944	Cobl
ENSMUSG00000028289	1291.09	-0.571388	0.196718	-2.9046	0.00367718	0.127208	Epha7
ENSMUSG00000110067	14.273	2.25001	0.775626	2.90089	0.00372099	0.12847	6330411D24Rik
ENSMUSG00000020589	3913.51	-0.747921	0.257997	-2.89895	0.00374413	0.129014	Fam49a
ENSMUSG00000043372	205.234	0.700843	0.241907	2.89716	0.00376563	0.129245	Hexim2
ENSMUSG00000068299	255.58	0.563867	0.194594	2.89766	0.0037596	0.129245	Nat8f4
ENSMUSG00000031380	42.4867	-1.21327	0.41914	-2.89468	0.00379551	0.130015	Vegfd
ENSMUSG00000063652	44.8644	1.16489	0.402602	2.89339	0.00381105	0.130275	Slc22a21
ENSMUSG00000056394	218.275	0.803986	0.277925	2.89282	0.00381803	0.130275	Lig1
ENSMUSG00000032680	46.8669	0.943907	0.326366	2.89217	0.00382592	0.13029	6820408C15Rik
ENSMUSG00000067860	165.649	0.902411	0.312138	2.89107	0.00383938	0.130494	Zic3
ENSMUSG00000036362	119.604	-0.657761	0.22761	-2.88985	0.00385421	0.130744	P2ry13
ENSMUSG00000001665	37.8186	1.14556	0.396704	2.88768	0.00388091	0.13114	Gstt3
ENSMUSG00000037578	57.4848	1.43945	0.498478	2.8877	0.00388071	0.13114	Pkd2l1
ENSMUSG00000069835	123.139	0.585526	0.202884	2.88602	0.00390147	0.131581	Sat2
ENSMUSG00000027574	423.887	0.715514	0.248066	2.88437	0.00392192	0.131761	Nkain4
ENSMUSG00000039156	1403.64	-0.531303	0.184197	-2.88443	0.00392124	0.131761	Stim2
ENSMUSG00000035984	105.793	-0.565473	0.196328	-2.88024	0.0039737	0.133245	Nme5
ENSMUSG00000026170	148.092	0.724941	0.251834	2.87865	0.0039938	0.133407	Cyp27a1
ENSMUSG00000002617	407.132	-0.720575	0.250294	-2.87892	0.00399038	0.133407	Zfp40
ENSMUSG00000036169	75.0283	-1.2797	0.4448	-2.87702	0.00401452	0.133728	Sostdc1
ENSMUSG00000054469	836.424	-0.594368	0.206615	-2.87669	0.00401874	0.133728	Lclat1
ENSMUSG00000004798	2415.73	-0.376934	0.131097	-2.87523	0.00403735	0.133882	Ulk2
ENSMUSG00000034731	2796.79	-0.673015	0.234131	-2.87453	0.00404635	0.133882	Dgkh
ENSMUSG00000003814	5305.89	-0.313309	0.108994	-2.87457	0.00404584	0.133882	Calr
ENSMUSG00000036769	374.454	-0.467162	0.162936	-2.86715	0.00414186	0.136268	Wdr44
ENSMUSG00000025509	682.287	0.818556	0.285447	2.86763	0.00413559	0.136268	Pnpla2
ENSMUSG00000019907	2403.33	-0.501263	0.174808	-2.86751	0.00413722	0.136268	Ppp1r12a
ENSMUSG00000054453	66.5287	-1.115	0.38922	-2.86472	0.00417379	0.136477	Sytl5
ENSMUSG00000039239	371.694	-0.562296	0.196326	-2.8641	0.00418195	0.136477	Tgfb2
ENSMUSG00000028483	629.697	-0.479561	0.167462	-2.8637	0.00418728	0.136477	Snapc3
ENSMUSG00000072501	1898.52	-0.412193	0.143926	-2.86392	0.0041843	0.136477	Phf20l1
ENSMUSG00000005871	9351.36	-0.723069	0.252419	-2.86456	0.00417593	0.136477	Apc
ENSMUSG00000056367	1414.28	-0.564463	0.197167	-2.86286	0.00419832	0.136582	Actr3b
ENSMUSG00000097797	38.9664	-1.05267	0.367862	-2.86158	0.00421533	0.136703	Gm26901
ENSMUSG00000063358	10305.1	-0.576697	0.201543	-2.8614	0.00421768	0.136703	Mapk1
ENSMUSG00000024054	911.816	-0.391108	0.136755	-2.85991	0.00423757	0.137093	Smchd1
ENSMUSG00000025141	48.9507	1.05545	0.3694	2.85721	0.00427381	0.137572	Myadml2
ENSMUSG00000034706	61.9298	0.737718	0.25821	2.85705	0.00427598	0.137572	Dnaic2
ENSMUSG00000032531	574.023	0.588531	0.205967	2.85741	0.00427114	0.137572	Amotl2
ENSMUSG00000066798	420.927	-0.423635	0.148351	-2.85562	0.00429523	0.137826	Zbtb6
ENSMUSG00000021340	932.027	0.695645	0.243633	2.8553	0.00429967	0.137826	Gpld1
ENSMUSG00000087269	49.8241	0.844627	0.296041	2.85308	0.00432981	0.137882	D330023K18Rik
ENSMUSG00000028334	224.601	0.63079	0.221034	2.85381	0.00431984	0.137882	Nans
ENSMUSG00000040565	985.364	-0.46495	0.16295	-2.85334	0.00432626	0.137882	Btaf1
ENSMUSG00000045103	1361.6	-0.435102	0.152515	-2.85285	0.00433297	0.137882	Dmd
ENSMUSG00000052392	65.6756	-0.767651	0.26947	-2.84875	0.0043892	0.139309	Acot4
ENSMUSG00000025867	17705.9	-0.663335	0.232879	-2.84841	0.00439376	0.139309	Cplx2
ENSMUSG00000097311	110.07	-0.977021	0.343233	-2.84652	0.00441993	0.139884	Gm26871
ENSMUSG00000020015	3188.32	-0.676306	0.23765	-2.84581	0.00442985	0.139945	Cdk17
ENSMUSG00000074345	260.218	-1.12101	0.394209	-2.84368	0.00445955	0.140629	Tnfaip8l3
ENSMUSG00000025202	97.7785	0.607511	0.213697	2.84286	0.00447105	0.140737	Scd3
ENSMUSG00000105516	12.6865	-1.39641	0.491341	-2.84204	0.00448264	0.140848	Gm36823
ENSMUSG00000028896	182.183	0.459526	0.161731	2.8413	0.00449305	0.140922	Rcc1
ENSMUSG00000108604	35.5262	1.26949	0.447502	2.83683	0.00455635	0.141022	Gm44850
ENSMUSG00000062252	93.0685	0.977053	0.344221	2.83844	0.00453341	0.141022	Lhfpl5
ENSMUSG00000015354	186.323	0.654723	0.230677	2.83827	0.00453586	0.141022	Pcolce2
ENSMUSG00000005057	209.827	0.750263	0.264632	2.83512	0.00458087	0.141022	Sh2b2
ENSMUSG00000022012	577.856	-0.424141	0.149648	-2.83427	0.00459312	0.141022	Enox1
ENSMUSG00000016477	627.196	-0.461066	0.162672	-2.83432	0.00459229	0.141022	E2f3
ENSMUSG00000030898	638.012	-0.938315	0.330743	-2.83699	0.00455406	0.141022	Cckbr
ENSMUSG00000019338	678.739	0.509075	0.179237	2.84023	0.00450811	0.141022	Zfp687
ENSMUSG00000020042	1062.32	0.659737	0.232689	2.83527	0.00457875	0.141022	Btbd11
ENSMUSG00000068373	4169.94	-0.691593	0.243676	-2.83817	0.00453737	0.141022	D430041D05Rik
ENSMUSG00000044667	4628.6	-0.743465	0.262086	-2.83672	0.00455798	0.141022	Plppr4
ENSMUSG00000005089	58997.4	-0.635925	0.224272	-2.8355	0.00457538	0.141022	Slc1a2
ENSMUSG00000029545	112.933	0.631102	0.222754	2.83318	0.00460871	0.141253	Acads
ENSMUSG00000061524	562.398	0.908105	0.320693	2.83169	0.00463025	0.141417	Zic2
ENSMUSG00000027495	587.495	0.432489	0.152714	2.83201	0.00462559	0.141417	Fam210b
ENSMUSG00000022876	19.7559	-1.23612	0.436667	-2.8308	0.00464322	0.141566	Samsn1
ENSMUSG00000027162	1638.14	-0.328899	0.116238	-2.82953	0.00466162	0.141879	Lin7c
ENSMUSG00000100583	13.5362	1.42218	0.503248	2.82599	0.00471343	0.142448	Gm29443
ENSMUSG00000032548	114.616	0.747907	0.264628	2.82626	0.00470946	0.142448	Slco2a1
ENSMUSG00000035048	260.097	0.549878	0.194486	2.82735	0.00469353	0.142448	Anapc13
ENSMUSG00000041624	316.56	-0.594776	0.210396	-2.82694	0.00469954	0.142448	Gucy1a2
ENSMUSG00000033066	8428.15	-0.935242	0.331004	-2.82547	0.00472108	0.142448	Gas7
ENSMUSG00000040564	20.2595	1.6546	0.585735	2.82483	0.00473061	0.142489	Apoc1
ENSMUSG00000067597	16.8977	-1.62155	0.574922	-2.82048	0.00479525	0.142714	Dgat2l6
ENSMUSG00000038537	18.1649	1.68838	0.598597	2.82057	0.00479386	0.142714	Mc3r
ENSMUSG00000024300	47.0833	-1.02382	0.362727	-2.82255	0.00476433	0.142714	Myo1f
ENSMUSG00000021376	151.838	0.542412	0.192307	2.82055	0.00479417	0.142714	Tpmt
ENSMUSG00000016918	492.05	-0.740626	0.26234	-2.82315	0.00475542	0.142714	Sulf1
ENSMUSG00000043670	2073.02	0.429494	0.152184	2.8222	0.00476956	0.142714	Diras1
ENSMUSG00000020486	3518.28	0.594796	0.210851	2.82093	0.00478843	0.142714	Septin4
ENSMUSG00000027669	802.309	-0.686799	0.243555	-2.8199	0.00480389	0.142728	Gnb4
ENSMUSG00000093460	182.797	0.870207	0.308804	2.81799	0.00483253	0.143335	Six3os1
ENSMUSG00000032612	1986.23	-0.250824	0.0891341	-2.81401	0.00489273	0.144629	Usp4
ENSMUSG00000021816	5814.32	-0.536766	0.190735	-2.8142	0.00488986	0.144629	Ppp3cb
ENSMUSG00000041079	150.713	-0.455589	0.16198	-2.81263	0.00491383	0.145008	Rwdd2b
ENSMUSG00000085516	17.3339	-1.63281	0.581634	-2.80728	0.00499617	0.145572	4930538E20Rik
ENSMUSG00000066233	81.9211	-0.632226	0.225285	-2.80634	0.00501081	0.145572	Tmem42
ENSMUSG00000001520	363	0.753102	0.268082	2.80922	0.00496622	0.145572	Nrip2
ENSMUSG00000021245	547.441	-0.414874	0.147741	-2.80812	0.00498314	0.145572	Mlh3
ENSMUSG00000057421	995.097	0.311515	0.110934	2.80813	0.00498305	0.145572	Las1l
ENSMUSG00000005899	1331.14	-0.472071	0.168237	-2.80599	0.00501628	0.145572	Smpd4
ENSMUSG00000032802	1701.27	0.313544	0.111728	2.80631	0.00501118	0.145572	Srxn1
ENSMUSG00000053825	1942.1	-0.673891	0.239754	-2.81075	0.00494254	0.145572	Ppfia2
ENSMUSG00000056211	7014.7	-0.8597	0.306236	-2.80731	0.0049957	0.145572	R3hdm1
ENSMUSG00000041607	71205.6	0.642085	0.228722	2.80727	0.00499631	0.145572	Mbp
ENSMUSG00000110020	30.6382	-1.05635	0.376934	-2.80247	0.00507135	0.145603	Gm45441
ENSMUSG00000105700	39.1191	-0.934205	0.333283	-2.80304	0.00506241	0.145603	Gm42772
ENSMUSG00000019880	149.632	-0.695374	0.248111	-2.80267	0.00506809	0.145603	Rspo3
ENSMUSG00000055373	2731.84	-0.379199	0.135264	-2.8034	0.00505662	0.145603	Fut9
ENSMUSG00000031960	3888.74	0.406766	0.14516	2.80219	0.0050757	0.145603	Aars
ENSMUSG00000051177	4605.17	-0.839135	0.299291	-2.80374	0.0050514	0.145603	Plcb1
ENSMUSG00000036634	4902.52	0.666961	0.238006	2.80229	0.00507416	0.145603	Mag
ENSMUSG00000021573	9689.64	-0.425719	0.151987	-2.80102	0.00509419	0.145894	Tppp
ENSMUSG00000027610	513.234	0.505535	0.18052	2.80043	0.00510344	0.14592	Gss
ENSMUSG00000033308	100.956	-1.04195	0.372432	-2.79769	0.00514695	0.146894	Dpyd
ENSMUSG00000046607	846.523	-0.916347	0.327601	-2.79714	0.00515567	0.146894	Hrk
ENSMUSG00000025813	1645.27	-0.471444	0.168571	-2.7967	0.00516274	0.146894	Homer2
ENSMUSG00000038745	15.726	-1.28646	0.460501	-2.79362	0.00521222	0.147104	Nlrp6
ENSMUSG00000020328	229.484	0.485566	0.173806	2.79371	0.00521066	0.147104	Nudcd2
ENSMUSG00000058656	1088.02	-0.607914	0.217521	-2.79473	0.00519426	0.147104	Samd12
ENSMUSG00000007656	3926.15	-1.01524	0.363401	-2.79373	0.00521046	0.147104	Arpp19
ENSMUSG00000024661	27346.2	0.351343	0.125696	2.79518	0.00518703	0.147104	Fth1
ENSMUSG00000026961	74.4501	-0.800654	0.287184	-2.78795	0.00530434	0.149463	Lrrc26
ENSMUSG00000027375	7144.93	0.446174	0.160188	2.78531	0.00534764	0.15044	Mal
ENSMUSG00000045903	238.541	-0.654367	0.235262	-2.78144	0.00541181	0.152001	Npas4
ENSMUSG00000046687	204.325	0.603799	0.217251	2.77927	0.00544815	0.152287	Gm5424
ENSMUSG00000028232	700.878	-0.476115	0.171301	-2.77941	0.0054458	0.152287	Tmem68
ENSMUSG00000014164	1302.63	-0.663171	0.238547	-2.78004	0.00543517	0.152287	Klhl3
ENSMUSG00000097006	35.374	0.885077	0.318929	2.77515	0.00551763	0.153414	9530082P21Rik
ENSMUSG00000029554	319.591	0.448017	0.16152	2.77376	0.00554117	0.153414	Mad1l1
ENSMUSG00000022770	3165.35	-0.505783	0.182265	-2.77498	0.00552047	0.153414	Dlg1
ENSMUSG00000058135	3170	0.375538	0.135306	2.77547	0.00551227	0.153414	Gstm1
ENSMUSG00000053477	5262.08	-0.709942	0.255933	-2.77394	0.00553822	0.153414	Tcf4
ENSMUSG00000048388	6260.36	-0.533514	0.19228	-2.77467	0.0055258	0.153414	Fam171b
ENSMUSG00000045053	120.896	-1.03197	0.372248	-2.77226	0.00556693	0.153779	Kcng3
ENSMUSG00000024793	149.87	-1.1073	0.399464	-2.77196	0.00557195	0.153779	Tnfrsf25
ENSMUSG00000098097	23.6982	-1.63425	0.590343	-2.76831	0.00563479	0.15388	6530403H02Rik
ENSMUSG00000035200	32.6539	1.99359	0.71985	2.76946	0.00561493	0.15388	Chrnb4
ENSMUSG00000040229	129.254	-0.625382	0.225847	-2.76905	0.00562203	0.15388	Gpr34
ENSMUSG00000024197	307.056	0.51729	0.186747	2.77001	0.00560545	0.15388	Plin3
ENSMUSG00000029311	744.274	0.353484	0.127651	2.76915	0.00562031	0.15388	Hsd17b11
ENSMUSG00000052373	873.305	-0.583529	0.2108	-2.76817	0.00563729	0.15388	Mpp3
ENSMUSG00000024548	890.993	-0.785695	0.283823	-2.76826	0.00563566	0.15388	Setbp1
ENSMUSG00000072591	63.6131	0.769245	0.278236	2.76472	0.00569715	0.154222	5930412G12Rik
ENSMUSG00000023232	83.1678	-1.01441	0.366815	-2.76546	0.00568422	0.154222	Serinc2
ENSMUSG00000019066	146.111	-0.717228	0.259464	-2.76427	0.00570505	0.154222	Rab3d
ENSMUSG00000004609	168.961	-0.749397	0.270981	-2.76549	0.00568371	0.154222	Cd33
ENSMUSG00000021903	190.914	0.818218	0.295948	2.76474	0.00569684	0.154222	Galnt15
ENSMUSG00000042680	716.756	-0.477663	0.172822	-2.76389	0.0057116	0.154222	Garem1
ENSMUSG00000031839	2770.06	-0.31909	0.115365	-2.76591	0.00567647	0.154222	Hsbp1
ENSMUSG00000049871	60.6552	0.8045	0.291386	2.76094	0.00576356	0.154316	Nlrc3
ENSMUSG00000048310	219.549	0.602646	0.218302	2.76061	0.00576936	0.154316	Pskh1
ENSMUSG00000029675	249.21	0.771426	0.279344	2.76156	0.00575252	0.154316	Eln
ENSMUSG00000047414	1347.67	-0.664411	0.240791	-2.75929	0.00579277	0.154316	Flrt2
ENSMUSG00000026933	2695.44	-0.360474	0.130463	-2.76303	0.00572674	0.154316	Camsap1
ENSMUSG00000058013	2878.89	-0.695633	0.252115	-2.75919	0.00579457	0.154316	Septin11
ENSMUSG00000041670	4320.99	-0.655333	0.237406	-2.76039	0.00577329	0.154316	Rims1
ENSMUSG00000018398	5730.7	-0.404233	0.146478	-2.75969	0.0057856	0.154316	Septin8
ENSMUSG00000038486	10250.1	0.359077	0.129978	2.76261	0.00573414	0.154316	Sv2a
ENSMUSG00000030443	140.569	-0.67523	0.24498	-2.75626	0.0058466	0.155464	Zfp583
ENSMUSG00000042453	2252.37	-0.613122	0.222527	-2.75527	0.00586433	0.155699	Reln
ENSMUSG00000000686	30.0329	1.15355	0.418842	2.75415	0.00588454	0.155762	Abhd15
ENSMUSG00000064177	62.5759	0.731391	0.265554	2.75421	0.00588349	0.155762	Ghrl
ENSMUSG00000052253	796.991	0.366498	0.133103	2.75348	0.00589648	0.155842	Zfp622
ENSMUSG00000068428	28.2183	-1.26117	0.458461	-2.75087	0.00594368	0.156708	Gmnc
ENSMUSG00000020656	270.078	-0.771623	0.280521	-2.75068	0.00594717	0.156708	Grhl1
ENSMUSG00000093930	3780.6	-0.558879	0.203229	-2.75	0.00595954	0.156797	Hmgcs1
ENSMUSG00000054582	14.7311	1.55427	0.565304	2.74944	0.00596968	0.156827	Pabpc1l
ENSMUSG00000022052	1959.25	-0.446975	0.162646	-2.74814	0.00599346	0.157216	Ppp2r2a
ENSMUSG00000038060	97.4896	0.635541	0.231308	2.74759	0.00600343	0.157241	Dlec1
ENSMUSG00000025077	180.606	-0.641569	0.233575	-2.74674	0.00601905	0.157414	Dclre1a
ENSMUSG00000014686	16.7661	1.45918	0.53138	2.74601	0.00603248	0.157454	Ceacam16
ENSMUSG00000030087	690.014	0.720032	0.262242	2.74568	0.00603858	0.157454	Klf15
ENSMUSG00000070527	27.953	1.42095	0.518368	2.7412	0.00612145	0.158293	Mkrn3
ENSMUSG00000055489	75.2763	1.13401	0.413498	2.74248	0.00609768	0.158293	Ano5
ENSMUSG00000027896	134.462	-0.552393	0.201565	-2.74052	0.00613417	0.158293	Slc16a4
ENSMUSG00000052504	164.829	-0.801394	0.29235	-2.74121	0.00612129	0.158293	Epha3
ENSMUSG00000035456	257.281	-1.00495	0.366483	-2.74216	0.0061037	0.158293	Prdm8
ENSMUSG00000050071	508.986	0.656399	0.239477	2.74097	0.0061258	0.158293	Bex1
ENSMUSG00000052751	765.123	0.43445	0.158422	2.74236	0.00609994	0.158293	Repin1
ENSMUSG00000026519	862.823	0.549565	0.200582	2.73986	0.00614657	0.158379	Tmem63a
ENSMUSG00000030089	111.012	0.855458	0.312369	2.73862	0.00616984	0.158383	Slc41a3
ENSMUSG00000039787	174.848	0.711688	0.259892	2.7384	0.00617393	0.158383	Cercam
ENSMUSG00000039601	5056.28	0.417557	0.152442	2.73911	0.00616055	0.158383	Rcan2
ENSMUSG00000019122	23.721	-0.974343	0.356296	-2.73464	0.00624481	0.159622	Ccl9
ENSMUSG00000027560	370.407	-0.371036	0.135703	-2.73417	0.00625377	0.159622	Dok5
ENSMUSG00000035342	1009.08	0.837398	0.306181	2.73497	0.00623852	0.159622	Lzts2
ENSMUSG00000032503	7260.23	-0.89365	0.326877	-2.73391	0.0062588	0.159622	Arpp21
ENSMUSG00000017817	33.2476	1.39769	0.511501	2.73253	0.00628493	0.160055	Jph2
ENSMUSG00000032564	1146.94	-0.403338	0.147655	-2.73161	0.00630252	0.160269	Cpne4
ENSMUSG00000030465	11336.7	-0.708245	0.259518	-2.72908	0.00635117	0.161272	Psd3
ENSMUSG00000098739	22.7617	1.18246	0.434968	2.7185	0.00655795	0.162047	Gm27151
ENSMUSG00000116772	29.1104	-1.47296	0.541425	-2.72053	0.0065177	0.162047	AC118542.3
ENSMUSG00000110332	46.0405	1.03418	0.379384	2.72595	0.00641158	0.162047	Gm19935
ENSMUSG00000070306	60.4693	1.5223	0.559414	2.72124	0.00650371	0.162047	Ccdc153
ENSMUSG00000084989	61.7371	1.5217	0.558439	2.72491	0.00643192	0.162047	Crocc2
ENSMUSG00000004655	64.1304	-1.39674	0.513448	-2.72031	0.00652214	0.162047	Aqp1
ENSMUSG00000074340	80.2203	0.564626	0.207591	2.71989	0.00653028	0.162047	Ovgp1
ENSMUSG00000094840	206.503	-0.930342	0.342072	-2.71973	0.00653354	0.162047	Muc3a
ENSMUSG00000028737	225.637	0.505459	0.185623	2.72304	0.00646844	0.162047	Aldh4a1
ENSMUSG00000057315	281.034	0.908087	0.333669	2.72152	0.00649819	0.162047	Arhgap24
ENSMUSG00000116138	284.418	0.782373	0.287272	2.72345	0.00646033	0.162047	C030006K11Rik
ENSMUSG00000031790	648.222	0.609986	0.224373	2.71863	0.00655532	0.162047	Mmp15
ENSMUSG00000004815	769.57	0.54401	0.199501	2.72685	0.00639419	0.162047	Dgkq
ENSMUSG00000045659	786.284	0.475874	0.174914	2.72062	0.00651594	0.162047	Plekha7
ENSMUSG00000026826	881.434	-0.990954	0.363664	-2.72491	0.00643186	0.162047	Nr4a2
ENSMUSG00000036306	1597.92	-0.764227	0.280738	-2.72221	0.00648471	0.162047	Lzts1
ENSMUSG00000028811	2193.92	0.416277	0.152915	2.72228	0.00648334	0.162047	Yars
ENSMUSG00000030226	2193.56	-0.835045	0.307155	-2.71864	0.00655511	0.162047	Lmo3
ENSMUSG00000053024	4396.68	0.503424	0.185073	2.72014	0.00652533	0.162047	Cntn2
ENSMUSG00000052142	56.6667	-0.673322	0.247765	-2.71758	0.00657604	0.16211	Rasal3
ENSMUSG00000022332	1790.85	-0.670353	0.246686	-2.71743	0.00657903	0.16211	Khdrbs3
ENSMUSG00000027569	349.681	0.441079	0.162384	2.71627	0.00660223	0.162452	Mrgbp
ENSMUSG00000112153	40.7718	-1.08518	0.400106	-2.71223	0.00668324	0.162618	Gm47591
ENSMUSG00000044948	98.061	0.789355	0.29108	2.71181	0.0066917	0.162618	Cfap43
ENSMUSG00000060969	98.9712	1.6241	0.59824	2.7148	0.00663164	0.162618	Irx1
ENSMUSG00000048281	121.252	0.765371	0.282319	2.71101	0.00670781	0.162618	Dleu7
ENSMUSG00000024798	280.478	0.70363	0.259239	2.71421	0.00664338	0.162618	Htr7
ENSMUSG00000034324	284.791	0.663124	0.244702	2.70992	0.00672997	0.162618	Tmem132c
ENSMUSG00000034194	320.83	0.439872	0.162188	2.71212	0.00668547	0.162618	R3hcc1
ENSMUSG00000050600	555.632	-1.06045	0.390729	-2.71402	0.00664712	0.162618	Zfp831
ENSMUSG00000032534	580.137	-0.424201	0.156459	-2.71126	0.00670278	0.162618	Cep63
ENSMUSG00000034480	688.139	-0.724314	0.266913	-2.71367	0.00665425	0.162618	Diaph2
ENSMUSG00000031309	1381.88	-0.709722	0.261876	-2.71015	0.00672531	0.162618	Rps6ka3
ENSMUSG00000033910	1817.43	-0.647337	0.238757	-2.71128	0.00670232	0.162618	Gucy1a1
ENSMUSG00000034818	3912.43	-0.58361	0.215314	-2.7105	0.00671816	0.162618	Celf5
ENSMUSG00000038178	1569.76	0.282085	0.104134	2.70887	0.00675134	0.162909	Slc43a2
ENSMUSG00000045179	42.7677	0.877443	0.324361	2.70514	0.00682749	0.164066	Sox3
ENSMUSG00000090659	65.5983	-0.771179	0.284988	-2.706	0.00680985	0.164066	Zfp493
ENSMUSG00000022186	5323.12	-0.303159	0.11206	-2.70532	0.00682383	0.164066	Oxct1
ENSMUSG00000021457	84.0428	-0.687249	0.254228	-2.70328	0.00686583	0.16454	Syk
ENSMUSG00000024325	601.826	0.662131	0.244937	2.70327	0.00686604	0.16454	Ring1
ENSMUSG00000109284	18.5099	1.69549	0.627376	2.7025	0.006882	0.164697	B230311B06Rik
ENSMUSG00000025403	494.131	0.618922	0.22907	2.70189	0.00689463	0.164773	Shmt2
ENSMUSG00000068037	275.624	-1.25245	0.463748	-2.7007	0.00691927	0.16495	Mas1
ENSMUSG00000032827	6985.35	-0.666362	0.246744	-2.70063	0.00692092	0.16495	Ppp1r9a
ENSMUSG00000047361	153.654	0.543978	0.201572	2.69867	0.00696167	0.165343	Gm973
ENSMUSG00000025791	1351.05	0.512762	0.190077	2.69765	0.006983	0.165343	Pgm2
ENSMUSG00000028278	2403.24	-0.624055	0.231282	-2.69824	0.00697071	0.165343	Rragd
ENSMUSG00000028266	2478.71	-0.953103	0.353244	-2.69815	0.00697268	0.165343	Lmo4
ENSMUSG00000053550	3674.84	-0.559611	0.20745	-2.69757	0.00698473	0.165343	Shisa7
ENSMUSG00000046027	191.851	0.575166	0.213303	2.69647	0.00700786	0.165474	Stard5
ENSMUSG00000024948	1858	0.542125	0.201055	2.69641	0.0070092	0.165474	Map4k2
ENSMUSG00000047495	1336.93	-0.911377	0.33809	-2.69566	0.00702488	0.165516	Dlgap2
ENSMUSG00000038020	2585.99	-0.654334	0.242758	-2.69542	0.00702991	0.165516	Rapgefl1
ENSMUSG00000044052	19.8213	1.24559	0.462319	2.69421	0.00705549	0.165894	Ccr10
ENSMUSG00000036894	628.289	-0.647233	0.240346	-2.69293	0.00708275	0.166063	Rap2b
ENSMUSG00000019828	1730.7	0.477244	0.177247	2.69253	0.0070912	0.166063	Grm1
ENSMUSG00000010066	1998.64	0.629919	0.233899	2.69312	0.00707865	0.166063	Cacna2d2
ENSMUSG00000038963	96.3789	0.674987	0.250808	2.69125	0.00711853	0.166137	Slco4a1
ENSMUSG00000026347	625.635	0.646547	0.240259	2.69104	0.00712288	0.166137	Tmem163
ENSMUSG00000067242	2067.8	-0.627846	0.233243	-2.69181	0.0071066	0.166137	Lgi1
ENSMUSG00000023266	327.584	0.798402	0.297034	2.68791	0.00719004	0.166557	Frs3
ENSMUSG00000035184	425.798	-0.408285	0.151871	-2.68837	0.00718017	0.166557	Fam124a
ENSMUSG00000039372	487.88	-0.360201	0.134017	-2.68772	0.00719409	0.166557	Marchf4
ENSMUSG00000042115	513.869	0.853683	0.317525	2.68856	0.00717613	0.166557	Klhdc8a
ENSMUSG00000020181	2051.22	-0.774541	0.288197	-2.68754	0.00719808	0.166557	Nav3
ENSMUSG00000091337	2290.79	-0.274894	0.102215	-2.68936	0.00715894	0.166557	Eid1
ENSMUSG00000020467	145.344	-0.53461	0.198997	-2.68652	0.00721996	0.166842	Efemp1
ENSMUSG00000026768	145.82	-0.979803	0.364908	-2.68506	0.0072516	0.167147	Itga8
ENSMUSG00000041734	260.858	0.562642	0.209565	2.68481	0.0072572	0.167147	Kirrel
ENSMUSG00000049191	741.013	0.624245	0.232529	2.68459	0.00726185	0.167147	Rtl5
ENSMUSG00000048482	558.672	-0.587244	0.218793	-2.68401	0.0072744	0.167215	Bdnf
ENSMUSG00000097730	37.23	-1.34004	0.499706	-2.68166	0.00732571	0.167765	Gm26588
ENSMUSG00000051617	108.782	-0.853815	0.318416	-2.68145	0.00733044	0.167765	Krt9
ENSMUSG00000027978	202.531	-1.03606	0.386484	-2.68072	0.00734631	0.167765	Prss12
ENSMUSG00000063760	682.305	-0.473146	0.176488	-2.6809	0.00734242	0.167765	Rnf217
ENSMUSG00000029403	735.798	-0.479149	0.178688	-2.68149	0.00732952	0.167765	Cdkl2
ENSMUSG00000087301	108.518	0.83763	0.312529	2.68017	0.00735842	0.167822	Gm13629
ENSMUSG00000030246	7740.76	0.288713	0.107778	2.67877	0.00738922	0.168305	Ldhb
ENSMUSG00000042700	7497.62	-0.766317	0.286204	-2.67752	0.00741695	0.168716	Sipa1l1
ENSMUSG00000028607	164.137	0.578099	0.215991	2.67649	0.00743977	0.168872	Cpt2
ENSMUSG00000053617	1468.43	-0.379457	0.141782	-2.67634	0.00744313	0.168872	Sh3pxd2a
ENSMUSG00000008822	133.274	0.821153	0.307015	2.67463	0.00748108	0.169293	Acyp1
ENSMUSG00000040752	153.942	0.603822	0.225744	2.6748	0.00747733	0.169293	Myh6
ENSMUSG00000105594	115.462	1.53402	0.573954	2.67272	0.0075239	0.169335	Gm43398
ENSMUSG00000044471	174.679	0.812591	0.303962	2.67333	0.00751027	0.169335	Lncpint
ENSMUSG00000039824	308.424	0.675356	0.252747	2.67206	0.00753871	0.169335	Myl6b
ENSMUSG00000057554	617.143	0.461126	0.172634	2.67112	0.00755991	0.169335	Lgals8
ENSMUSG00000074093	1087.9	0.363811	0.136091	2.67329	0.00751121	0.169335	Svip
ENSMUSG00000041997	1853.2	-0.610779	0.22848	-2.67322	0.00751261	0.169335	Tlk1
ENSMUSG00000054814	1955.61	-0.451172	0.168916	-2.67098	0.00756302	0.169335	Usp46
ENSMUSG00000058975	6042.59	0.424691	0.159024	2.6706	0.00757148	0.169335	Kcnc1
ENSMUSG00000026202	6044.32	-0.387325	0.145053	-2.67023	0.00757985	0.169335	Tuba4a
ENSMUSG00000055430	8676.55	0.769981	0.288264	2.67109	0.00756045	0.169335	Nap1l5
ENSMUSG00000037321	45.4765	0.863284	0.323412	2.6693	0.00760089	0.169588	Tap1
ENSMUSG00000105748	24.0941	-1.1198	0.420148	-2.66526	0.00769291	0.169689	Gm43088
ENSMUSG00000025049	136.149	-0.529015	0.198386	-2.66659	0.00766244	0.169689	Taf5
ENSMUSG00000028626	149.128	1.07278	0.402679	2.6641	0.00771953	0.169689	Col9a2
ENSMUSG00000054517	166.956	-0.473927	0.177771	-2.66593	0.00767748	0.169689	Trim65
ENSMUSG00000031958	240.112	0.692077	0.25946	2.66737	0.00764469	0.169689	Ldhd
ENSMUSG00000021585	298.683	0.424714	0.159404	2.6644	0.00771266	0.169689	Cast
ENSMUSG00000021360	438.466	-1.02549	0.384783	-2.66511	0.00769641	0.169689	Gcnt2
ENSMUSG00000060935	680.017	-0.387886	0.145603	-2.66399	0.00772194	0.169689	Tmem263
ENSMUSG00000032846	785.978	-0.447695	0.167959	-2.6655	0.00768735	0.169689	Zswim6
ENSMUSG00000025221	1613.96	-0.715336	0.268297	-2.66621	0.0076712	0.169689	Kcnip2
ENSMUSG00000042109	2525.56	0.416672	0.156224	2.66713	0.00765012	0.169689	Csdc2
ENSMUSG00000041773	11397.7	-0.882695	0.33107	-2.66619	0.00767168	0.169689	Enc1
ENSMUSG00000024027	42.7553	1.17137	0.439967	2.6624	0.00775865	0.170112	Glp1r
ENSMUSG00000054693	1583.41	-0.323779	0.121616	-2.66231	0.00776071	0.170112	Adam10
ENSMUSG00000095147	18.8252	1.721	0.64672	2.66112	0.00778806	0.170498	Mir3070a
ENSMUSG00000043889	21.7194	-1.05362	0.396107	-2.65995	0.00781521	0.170665	Gm8399
ENSMUSG00000037606	653.012	0.495217	0.186164	2.66011	0.00781152	0.170665	Osbpl5
ENSMUSG00000040747	94.5221	-0.633068	0.238102	-2.65881	0.0078416	0.170689	Cd53
ENSMUSG00000020623	246.706	-0.547421	0.205854	-2.65927	0.0078309	0.170689	Map2k6
ENSMUSG00000024424	481.182	0.447182	0.168199	2.65864	0.00784563	0.170689	Ttc39c
ENSMUSG00000103037	155.2	-0.539537	0.203134	-2.65607	0.00790583	0.170996	Pcdhgb1
ENSMUSG00000081684	227.596	-0.530357	0.199589	-2.65724	0.00787825	0.170996	Rps2-ps13
ENSMUSG00000028360	329.492	-0.700818	0.263828	-2.65634	0.00789944	0.170996	Slc44a5
ENSMUSG00000003865	428.357	0.353117	0.132959	2.65583	0.00791142	0.170996	Gys1
ENSMUSG00000021810	635.023	-0.337718	0.127176	-2.65553	0.00791846	0.170996	Ecd
ENSMUSG00000000861	1493.27	-0.761152	0.286619	-2.65562	0.00791629	0.170996	Bcl11a
ENSMUSG00000090399	20.4059	1.19242	0.449314	2.65386	0.00795758	0.171059	Gm38399
ENSMUSG00000097815	173.906	0.456594	0.172138	2.65249	0.00798996	0.171059	Gm26809
ENSMUSG00000034282	287.688	0.69862	0.263209	2.65424	0.00794875	0.171059	Evpl
ENSMUSG00000034889	502.278	0.392607	0.147989	2.65295	0.0079791	0.171059	Cactin
ENSMUSG00000021182	1026.52	-0.508672	0.191683	-2.65372	0.00796106	0.171059	Ccdc88c
ENSMUSG00000054708	1051.63	0.582354	0.219393	2.65438	0.00794534	0.171059	Ankrd24
ENSMUSG00000027797	15783.2	-0.63421	0.239082	-2.65269	0.00798535	0.171059	Dclk1
ENSMUSG00000057982	284.835	-0.64011	0.241469	-2.65089	0.00802792	0.171662	Zfp809
ENSMUSG00000018339	421.92	0.97091	0.366332	2.65035	0.00804076	0.171726	Gpx3
ENSMUSG00000022483	35.572	1.11863	0.423044	2.64425	0.00818714	0.172385	Col2a1
ENSMUSG00000104459	37.9748	-1.16869	0.441346	-2.64801	0.00809665	0.172385	Gm37824
ENSMUSG00000051735	54.5018	0.782237	0.295406	2.648	0.00809684	0.172385	Rinl
ENSMUSG00000042473	148.225	-0.526375	0.198909	-2.64631	0.0081375	0.172385	Tbc1d8b
ENSMUSG00000045731	184.849	0.885456	0.334506	2.64705	0.00811962	0.172385	Pnoc
ENSMUSG00000048965	202.074	0.736069	0.278208	2.64575	0.00815096	0.172385	Mrgpre
ENSMUSG00000078137	693.501	-0.740135	0.279586	-2.64725	0.0081149	0.172385	Ankrd63
ENSMUSG00000003974	938.601	-0.545492	0.206191	-2.64557	0.00815537	0.172385	Grm3
ENSMUSG00000018322	1235.68	-0.2732	0.103239	-2.64629	0.00813791	0.172385	Tomm34
ENSMUSG00000039114	1611.25	-0.553617	0.209375	-2.64413	0.00819002	0.172385	Nrn1
ENSMUSG00000020640	1683.83	-0.344674	0.130329	-2.64465	0.00817744	0.172385	Itsn2
ENSMUSG00000024640	2258.79	0.290577	0.109846	2.64531	0.00816149	0.172385	Psat1
ENSMUSG00000026482	1984.84	-0.494384	0.187033	-2.6433	0.00821022	0.172602	Rgl1
ENSMUSG00000037455	303.389	-0.51793	0.196014	-2.64231	0.00823421	0.172899	Slc18b1
ENSMUSG00000070407	57.4512	1.03922	0.393935	2.63804	0.00833867	0.173238	Hs3st3b1
ENSMUSG00000110618	57.1902	-1.73452	0.657322	-2.63877	0.00832065	0.173238	Gm39822
ENSMUSG00000025140	86.3578	0.911287	0.345528	2.63738	0.00835504	0.173238	Pycr1
ENSMUSG00000078249	94.6604	0.893472	0.338665	2.63822	0.00833428	0.173238	Hmga1b
ENSMUSG00000037474	113.736	-1.41666	0.536987	-2.63817	0.00833558	0.173238	Dtl
ENSMUSG00000026479	179.743	-0.886142	0.3358	-2.6389	0.00831764	0.173238	Lamc2
ENSMUSG00000019803	187.022	-0.589985	0.223717	-2.6372	0.00835944	0.173238	Nr2e1
ENSMUSG00000046523	498.018	-0.807552	0.306152	-2.63775	0.00834586	0.173238	Kctd4
ENSMUSG00000000552	1548.32	0.703439	0.266649	2.63807	0.00833801	0.173238	Zfp385a
ENSMUSG00000023927	1828.71	-0.760485	0.288264	-2.63815	0.0083359	0.173238	Satb1
ENSMUSG00000075590	3017.46	0.522263	0.197802	2.64033	0.00828257	0.173238	Nrbp2
ENSMUSG00000025759	329.856	-0.415955	0.157776	-2.63636	0.00838004	0.173459	Mfsd8
ENSMUSG00000069911	170.758	0.998165	0.378785	2.63518	0.00840936	0.173618	Fam196b
ENSMUSG00000031400	675.83	0.398004	0.151054	2.63485	0.00841756	0.173618	G6pdx
ENSMUSG00000064373	5262.58	0.332279	0.126086	2.63533	0.0084056	0.173618	Selenop
ENSMUSG00000097783	24.8649	1.06577	0.404649	2.63382	0.00844294	0.173732	Gm26747
ENSMUSG00000028444	1529.14	0.425749	0.161628	2.63414	0.00843509	0.173732	Cntfr
ENSMUSG00000047798	12.7301	1.46664	0.556954	2.63332	0.00845541	0.173783	Cd300lf
ENSMUSG00000104784	35.8424	0.96635	0.367088	2.63248	0.0084765	0.173808	Gm42984
ENSMUSG00000107041	35.9075	-1.1195	0.425205	-2.63286	0.00846698	0.173808	Gm42735
ENSMUSG00000010080	189.856	1.11887	0.425132	2.63183	0.00849272	0.173936	Epn3
ENSMUSG00000097684	23.454	-1.25758	0.478015	-2.63085	0.00851727	0.174218	Gm26645
ENSMUSG00000028243	1040.79	-0.487599	0.185365	-2.63048	0.00852641	0.174218	Ubxn2b
ENSMUSG00000032796	172.415	0.629349	0.239332	2.62961	0.00854824	0.174256	Lama1
ENSMUSG00000068099	1243.69	0.395178	0.150265	2.62988	0.00854146	0.174256	1500009C09Rik
ENSMUSG00000097343	51.5489	0.667557	0.254043	2.62773	0.00859565	0.175019	9030407P20Rik
ENSMUSG00000047642	17.9022	1.38205	0.526089	2.62703	0.00861341	0.17507	D930020B18Rik
ENSMUSG00000036469	610.821	-0.528912	0.20138	-2.62644	0.00862823	0.17507	Marchf1
ENSMUSG00000009681	3746.2	-0.388862	0.148036	-2.62681	0.00861892	0.17507	Bcr
ENSMUSG00000025577	65.5234	0.735839	0.280506	2.62325	0.00870947	0.175901	Cbx2
ENSMUSG00000044285	185.829	0.57373	0.2187	2.62337	0.00870652	0.175901	Gm1821
ENSMUSG00000028527	616.041	-0.591483	0.225445	-2.62362	0.00870006	0.175901	Ak4
ENSMUSG00000019699	3327.83	-0.51926	0.197933	-2.62341	0.00870543	0.175901	Akt3
ENSMUSG00000020000	145.534	-1.00554	0.383656	-2.62093	0.008769	0.176899	Moxd1
ENSMUSG00000009772	34.734	0.906814	0.346094	2.62014	0.00878947	0.177107	Nuak2
ENSMUSG00000116114	13.8495	-1.79297	0.684868	-2.61798	0.00884527	0.177194	Gm35853
ENSMUSG00000065968	28.0581	-0.993967	0.379534	-2.61891	0.00882108	0.177194	Ifitm7
ENSMUSG00000060923	179.735	0.790374	0.302045	2.61674	0.0088774	0.177194	Acyp2
ENSMUSG00000091387	187.914	-0.91218	0.348239	-2.61941	0.0088083	0.177194	Gcnt4
ENSMUSG00000110523	358.425	-1.10637	0.422852	-2.61645	0.00888504	0.177194	C230057M02Rik
ENSMUSG00000098557	647.485	-0.415398	0.158631	-2.61864	0.00882821	0.177194	Kctd12
ENSMUSG00000024193	695.492	0.790988	0.302128	2.61805	0.00884327	0.177194	Phf1
ENSMUSG00000017978	1631.87	-0.640892	0.244872	-2.61725	0.00886409	0.177194	Cadps2
ENSMUSG00000033676	5864.58	-0.642338	0.245486	-2.6166	0.00888111	0.177194	Gabrb3
ENSMUSG00000016206	32.4396	0.916816	0.350469	2.61597	0.00889746	0.177239	H2-M3
ENSMUSG00000019866	45.6587	0.871678	0.333588	2.61304	0.00897406	0.178358	Crybg1
ENSMUSG00000018548	7757.86	-0.349491	0.13374	-2.61321	0.00896971	0.178358	Trim37
ENSMUSG00000043789	14.212	1.34096	0.513751	2.61013	0.00905067	0.179066	Vwce
ENSMUSG00000097760	17.408	-1.19528	0.457748	-2.61122	0.00902198	0.179066	6030442K20Rik
ENSMUSG00000051934	596.652	-0.337767	0.129398	-2.61029	0.00904644	0.179066	Spats2
ENSMUSG00000028518	953.473	-0.435271	0.166728	-2.61067	0.00903648	0.179066	Prkaa2
ENSMUSG00000054412	45.3523	0.829201	0.317739	2.6097	0.00906229	0.179093	Gm4793
ENSMUSG00000020099	945.378	0.646844	0.247907	2.60922	0.00907491	0.17914	Unc5b
ENSMUSG00000048218	475.267	0.852252	0.326928	2.60685	0.00913794	0.18018	Amigo2
ENSMUSG00000060012	1672	0.477017	0.18303	2.60622	0.00915481	0.180309	Kif13b
ENSMUSG00000028049	543.4	0.499573	0.191787	2.60483	0.00919206	0.180636	Scamp3
ENSMUSG00000007989	2873.96	-0.590726	0.22678	-2.60484	0.00919175	0.180636	Fzd3
ENSMUSG00000000184	1204.09	-0.822949	0.316085	-2.60357	0.00922588	0.181097	Ccnd2
ENSMUSG00000027848	239.999	-0.395079	0.151837	-2.60199	0.00926835	0.181612	Olfml3
ENSMUSG00000027523	2648.52	0.961814	0.36972	2.60147	0.00928261	0.181612	Gnas
ENSMUSG00000063659	4574.15	-0.888591	0.341576	-2.60144	0.00928332	0.181612	Zbtb18
ENSMUSG00000103280	47.6267	-1.04089	0.400447	-2.59932	0.00934093	0.182535	Gm37277
ENSMUSG00000110790	18.3563	-1.33535	0.513983	-2.59804	0.0093757	0.182724	Gm47079
ENSMUSG00000036372	179.796	0.653276	0.251415	2.5984	0.00936594	0.182724	Tmem258
ENSMUSG00000023048	573.592	0.624369	0.240344	2.59781	0.009382	0.182724	Prr13
ENSMUSG00000081179	15.4525	-1.39138	0.53598	-2.59596	0.00943259	0.182965	Gm13136
ENSMUSG00000085558	57.2093	0.791599	0.304935	2.59596	0.00943267	0.182965	4930412C18Rik
ENSMUSG00000044707	70.6634	-0.682993	0.263134	-2.59561	0.00944225	0.182965	Ccnjl
ENSMUSG00000002897	289.134	-0.626088	0.241291	-2.59474	0.00946615	0.182965	Il17ra
ENSMUSG00000025170	409.609	-0.720595	0.277697	-2.5949	0.00946195	0.182965	Rab40b
ENSMUSG00000035637	460.655	0.576423	0.222155	2.59469	0.00946768	0.182965	Grhpr
ENSMUSG00000050965	3913.48	-0.757845	0.291829	-2.59688	0.00940739	0.182965	Prkca
ENSMUSG00000015501	5931.53	-0.716559	0.276501	-2.59153	0.00955502	0.184449	Hivep2
ENSMUSG00000049608	32.7424	-1.04028	0.401673	-2.58988	0.00960102	0.184928	Gpr55
ENSMUSG00000037253	752.932	-0.364493	0.140722	-2.59017	0.0095929	0.184928	Mex3c
ENSMUSG00000053552	293.558	0.586208	0.226423	2.58899	0.00962578	0.185201	Ebf4
ENSMUSG00000101337	110.705	-0.664518	0.256713	-2.58857	0.00963763	0.185225	Dnah7c
ENSMUSG00000020166	1068.04	-0.339241	0.131098	-2.5877	0.00966197	0.185285	Cnot2
ENSMUSG00000021194	3359.29	0.519295	0.200652	2.58804	0.00965236	0.185285	Chga
ENSMUSG00000037242	2850.65	0.398176	0.153949	2.58641	0.0096981	0.185774	Clic4
ENSMUSG00000031285	811.043	-0.638725	0.247012	-2.5858	0.0097152	0.185898	Dcx
ENSMUSG00000060798	268.378	-0.397964	0.153995	-2.58426	0.00975892	0.186326	Intu
ENSMUSG00000029657	5818.2	-0.371146	0.143601	-2.58456	0.00975026	0.186326	Hsph1
ENSMUSG00000002983	82.6263	-0.628326	0.243218	-2.58339	0.00978356	0.186593	Relb
ENSMUSG00000032034	58.2041	1.29256	0.500532	2.58237	0.00981251	0.186737	Kcnj5
ENSMUSG00000025658	4197.65	-1.00379	0.388681	-2.58256	0.00980702	0.186737	Cnksr2
ENSMUSG00000043903	48.8633	1.08529	0.4206	2.58034	0.00987022	0.18702	Zfp469
ENSMUSG00000034739	70.9966	-1.18616	0.459575	-2.581	0.00985158	0.18702	Mfrp
ENSMUSG00000025407	93.8994	1.0027	0.388551	2.58062	0.00986231	0.18702	Gli1
ENSMUSG00000015396	435.738	0.959868	0.371906	2.58094	0.00985318	0.18702	Cd83
ENSMUSG00000047746	23.0692	1.06256	0.412395	2.57656	0.00997891	0.187449	Fbxo40
ENSMUSG00000043168	27.9141	1.01814	0.395058	2.57718	0.00996087	0.187449	4930426D05Rik
ENSMUSG00000109387	89.2188	-0.926458	0.359482	-2.5772	0.0099604	0.187449	Gm45182
ENSMUSG00000014444	204.263	-0.463338	0.179982	-2.57436	0.0100426	0.187449	Piezo1
ENSMUSG00000025792	259.491	0.784653	0.304779	2.5745	0.0100387	0.187449	Slc25a10
ENSMUSG00000010825	299.492	1.75133	0.67993	2.57574	0.0100025	0.187449	Grid2ip
ENSMUSG00000050248	297.001	-0.57228	0.222049	-2.57727	0.00995855	0.187449	Evc2
ENSMUSG00000064181	548.688	-0.326265	0.126707	-2.57495	0.0100256	0.187449	Rab3ip
ENSMUSG00000052087	673.041	-0.892131	0.346058	-2.57798	0.00993785	0.187449	Rgs14
ENSMUSG00000036180	708.076	0.338147	0.131255	2.57626	0.00998767	0.187449	Gatad2a
ENSMUSG00000074607	912.652	0.800838	0.310519	2.57903	0.00990782	0.187449	Tox2
ENSMUSG00000027950	1549.98	0.386341	0.149927	2.57687	0.00997008	0.187449	Chrnb2
ENSMUSG00000070738	1963.37	-0.356559	0.138505	-2.57434	0.0100431	0.187449	Dgkd
ENSMUSG00000037685	5052.07	-0.3792	0.147242	-2.57535	0.010014	0.187449	Atp8a1
ENSMUSG00000026527	1354.99	-0.372071	0.144613	-2.57288	0.0100857	0.188045	Rgs7
ENSMUSG00000053199	1817.39	-0.546555	0.212481	-2.57225	0.010104	0.188185	Arhgap20
ENSMUSG00000098128	52.5598	-0.860313	0.334582	-2.57131	0.0101314	0.188294	Gm3693
ENSMUSG00000043259	1128.74	-0.46466	0.180695	-2.57151	0.0101256	0.188294	Fam13c
ENSMUSG00000026247	528.72	1.0068	0.391687	2.57043	0.0101572	0.188573	Ecel1
ENSMUSG00000043993	105.545	0.85737	0.333788	2.56861	0.0102109	0.188596	2900052L18Rik
ENSMUSG00000068205	1000.64	-0.449198	0.174884	-2.56855	0.0102125	0.188596	Macrod2
ENSMUSG00000044067	1052	-0.810584	0.31558	-2.56855	0.0102125	0.188596	Gpr22
ENSMUSG00000004865	1544.92	-0.355557	0.138375	-2.56951	0.0101843	0.188596	Srpk1
ENSMUSG00000042523	2624.36	-0.462284	0.179965	-2.56874	0.0102069	0.188596	Dnal1
ENSMUSG00000094910	2686.99	-0.485768	0.18915	-2.56816	0.0102241	0.188611	D430019H16Rik
ENSMUSG00000062014	3552.53	-0.365824	0.142471	-2.56771	0.0102372	0.188654	Gmfb
ENSMUSG00000028339	190.861	0.776669	0.302523	2.56731	0.0102492	0.188676	Col15a1
ENSMUSG00000006411	84.008	0.832266	0.324591	2.56405	0.0103459	0.189002	Nectin4
ENSMUSG00000060600	125.068	0.566821	0.220881	2.56618	0.0102825	0.189002	Eno3
ENSMUSG00000078350	195.858	0.784101	0.305796	2.56414	0.0103433	0.189002	Smim1
ENSMUSG00000020027	331.965	-0.504993	0.196898	-2.56474	0.0103254	0.189002	Socs2
ENSMUSG00000028542	1061.38	0.695258	0.270999	2.56554	0.0103016	0.189002	Slc6a9
ENSMUSG00000033014	1614.41	-0.380994	0.148589	-2.56408	0.0103451	0.189002	Trim33
ENSMUSG00000039058	2399.33	-0.826359	0.322319	-2.56379	0.0103535	0.189002	Ak5
ENSMUSG00000040125	4733.21	-0.692995	0.270247	-2.5643	0.0103383	0.189002	Gpr26
ENSMUSG00000020022	535.588	0.739087	0.28843	2.56245	0.0103938	0.189068	Ndufa12
ENSMUSG00000092083	645.098	-0.512375	0.199978	-2.56215	0.0104026	0.189068	Kcnb2
ENSMUSG00000053398	1116.13	0.490804	0.191523	2.56264	0.0103879	0.189068	Phgdh
ENSMUSG00000026509	1561.48	0.262583	0.102511	2.5615	0.010422	0.189068	Capn2
ENSMUSG00000042599	1697.64	-0.466642	0.18211	-2.56242	0.0103945	0.189068	Kdm7a
ENSMUSG00000027827	2054.98	-0.478244	0.186694	-2.56165	0.0104176	0.189068	Kcnab1
ENSMUSG00000085555	63.8679	1.2292	0.480702	2.5571	0.010555	0.191084	2610035F20Rik
ENSMUSG00000038042	1060.26	0.337632	0.132031	2.55723	0.0105511	0.191084	Ptpdc1
ENSMUSG00000052821	13.089	-1.45932	0.571109	-2.55523	0.0106116	0.191514	Cysltr1
ENSMUSG00000006494	1086.43	-0.450411	0.176228	-2.55583	0.0105933	0.191514	Pdk1
ENSMUSG00000021596	1266.57	-0.74047	0.289785	-2.55524	0.0106114	0.191514	Mctp1
ENSMUSG00000031342	16553.3	-0.40038	0.156806	-2.55334	0.0106695	0.19236	Gpm6b
ENSMUSG00000038763	15.5826	1.20418	0.47214	2.55047	0.0107577	0.192966	Alpk3
ENSMUSG00000004951	130.17	0.743418	0.291605	2.5494	0.0107909	0.192966	Hspb1
ENSMUSG00000045777	266.604	0.679226	0.26654	2.54831	0.0108246	0.192966	Ifitm10
ENSMUSG00000020902	438.552	0.632985	0.248355	2.54871	0.0108124	0.192966	Ntn1
ENSMUSG00000039982	934.663	-0.325147	0.127589	-2.54838	0.0108224	0.192966	Dtx4
ENSMUSG00000031864	1312.47	-0.335414	0.13158	-2.54913	0.0107991	0.192966	Ints10
ENSMUSG00000092274	1447.67	0.80433	0.31523	2.55157	0.010724	0.192966	Neat1
ENSMUSG00000063297	3535.61	-0.362597	0.142248	-2.54905	0.0108015	0.192966	Luzp2
ENSMUSG00000015733	3575.97	-0.318005	0.12475	-2.54913	0.0107993	0.192966	Capza2
ENSMUSG00000022425	8643.51	-0.606682	0.237788	-2.55136	0.0107303	0.192966	Enpp2
ENSMUSG00000030209	14038.5	-0.750713	0.294428	-2.54974	0.0107805	0.192966	Grin2b
ENSMUSG00000038295	127.268	0.872303	0.342364	2.54788	0.010838	0.193006	Atg9b
ENSMUSG00000022773	342.675	-0.832461	0.326815	-2.5472	0.0108593	0.193189	Ypel1
ENSMUSG00000030111	219.631	0.73019	0.286857	2.54548	0.0109127	0.193788	A2m
ENSMUSG00000030315	477.132	-0.442814	0.173972	-2.54531	0.0109179	0.193788	Vgll4
ENSMUSG00000022620	554.046	0.491376	0.193081	2.54493	0.01093	0.193788	Arsa
ENSMUSG00000034021	2732.77	-0.413962	0.162676	-2.54469	0.0109373	0.193788	Pds5b
ENSMUSG00000079593	434.832	0.829905	0.326289	2.54347	0.0109759	0.194078	Gm14597
ENSMUSG00000031451	2080.54	0.325866	0.128111	2.54363	0.0109708	0.194078	Gas6
ENSMUSG00000116525	61.92	-1.22975	0.483822	-2.54174	0.0110302	0.194147	Gm30371
ENSMUSG00000028865	64.56	0.671525	0.264098	2.54271	0.0109995	0.194147	Cd164l2
ENSMUSG00000020098	114.572	1.16109	0.456901	2.54122	0.0110465	0.194147	Pcbd1
ENSMUSG00000041423	210.116	1.21907	0.479495	2.5424	0.0110093	0.194147	Paqr6
ENSMUSG00000031302	1271.13	-0.331256	0.13034	-2.54147	0.0110386	0.194147	Nlgn3
ENSMUSG00000049176	1705.62	-0.379173	0.149198	-2.54141	0.0110406	0.194147	Frmpd4
ENSMUSG00000015971	937.481	0.302016	0.11889	2.54029	0.0110759	0.194468	Actr8
ENSMUSG00000079283	102.299	0.763283	0.300895	2.53671	0.0111899	0.195178	2310009B15Rik
ENSMUSG00000025529	330.974	-0.47829	0.188517	-2.53712	0.011177	0.195178	Zfp711
ENSMUSG00000028496	707.353	-0.356387	0.1405	-2.53657	0.0111945	0.195178	Mllt3
ENSMUSG00000036636	1182.76	0.368765	0.145344	2.53718	0.0111749	0.195178	Clcn7
ENSMUSG00000074923	1231.21	-0.575	0.226555	-2.53801	0.0111485	0.195178	Pak6
ENSMUSG00000037902	6454.51	-0.492378	0.194024	-2.53771	0.011158	0.195178	Sirpa
ENSMUSG00000028161	22292.7	-0.746232	0.294186	-2.5366	0.0111935	0.195178	Ppp3ca
ENSMUSG00000029193	30.3286	1.65204	0.651416	2.53607	0.0112104	0.195259	Cckar
ENSMUSG00000035944	205.918	0.403352	0.159201	2.5336	0.0112899	0.196448	Ttc38
ENSMUSG00000002459	449.363	-0.740365	0.292322	-2.53271	0.0113186	0.196556	Rgs20
ENSMUSG00000023079	612.118	0.395132	0.155993	2.53301	0.0113086	0.196556	Gtf2ird1
ENSMUSG00000056158	1804.93	-0.460894	0.182187	-2.52978	0.0114134	0.19781	Car10
ENSMUSG00000049583	4629.88	-0.483279	0.191018	-2.53001	0.0114058	0.19781	Grm5
ENSMUSG00000061911	5608.52	-0.491243	0.194256	-2.52884	0.0114439	0.198141	Myt1l
ENSMUSG00000055805	1907.17	-0.673901	0.266598	-2.52778	0.0114785	0.198544	Fmnl1
ENSMUSG00000036225	1245.24	-0.684697	0.270919	-2.52731	0.0114939	0.198614	Kctd1
ENSMUSG00000053963	5357.91	-0.578346	0.228929	-2.52631	0.0115268	0.198985	Stum
ENSMUSG00000098979	44.8466	1.29783	0.514102	2.52446	0.0115877	0.19925	Gm27544
ENSMUSG00000022090	232.905	0.803199	0.318133	2.52473	0.0115789	0.19925	Pdlim2
ENSMUSG00000068922	295.022	0.409899	0.162321	2.52524	0.0115618	0.19925	Msto1
ENSMUSG00000038495	1744.89	0.388947	0.154038	2.52501	0.0115694	0.19925	Otud7b
ENSMUSG00000026831	60.6438	0.617551	0.244842	2.52224	0.011661	0.199723	1700007K13Rik
ENSMUSG00000114584	117.769	-0.760582	0.301526	-2.52245	0.0116542	0.199723	Gm47694
ENSMUSG00000045251	131.164	0.44725	0.177295	2.52264	0.0116478	0.199723	Zfp688
ENSMUSG00000010154	403.14	0.663215	0.262844	2.52322	0.0116284	0.199723	Spire2
ENSMUSG00000097515	44.5046	1.21818	0.48329	2.52059	0.0117158	0.20036	1700040D17Rik
ENSMUSG00000028007	198.809	-0.503198	0.199648	-2.52043	0.0117211	0.20036	Snx7
ENSMUSG00000029595	59.7445	1.73831	0.690613	2.51705	0.0118342	0.2004	Lhx5
ENSMUSG00000102995	74.906	-1.1268	0.44746	-2.5182	0.0117956	0.2004	A330074H02Rik
ENSMUSG00000047988	92.3898	0.603769	0.239909	2.51666	0.0118474	0.2004	4933428G20Rik
ENSMUSG00000100241	96.4458	0.874541	0.347372	2.51759	0.0118159	0.2004	Slc18a3
ENSMUSG00000045691	166.412	0.484992	0.19277	2.51591	0.0118726	0.2004	Thtpa
ENSMUSG00000042010	249.841	0.585556	0.232651	2.51689	0.0118395	0.2004	Acacb
ENSMUSG00000040410	331.865	0.336761	0.133694	2.51889	0.0117726	0.2004	Fbxl4
ENSMUSG00000026687	628.84	0.427515	0.169809	2.51762	0.0118151	0.2004	Aldh9a1
ENSMUSG00000035828	933.795	0.64247	0.255295	2.51657	0.0118502	0.2004	Pim3
ENSMUSG00000048483	1189.41	0.437381	0.173718	2.51777	0.0118102	0.2004	Zdhhc22
ENSMUSG00000017009	1416.73	0.409711	0.162842	2.516	0.0118694	0.2004	Sdc4
ENSMUSG00000036452	2794.1	-0.430743	0.171095	-2.51757	0.0118167	0.2004	Arhgap26
ENSMUSG00000026384	3600.77	0.428728	0.170255	2.51816	0.0117971	0.2004	Ptpn4
ENSMUSG00000033061	1321.58	0.867317	0.344973	2.51416	0.0119317	0.201203	Resp18
ENSMUSG00000063531	777.283	-0.483183	0.192252	-2.51327	0.0119617	0.201515	Sema3e
ENSMUSG00000047842	4958.39	-0.667641	0.26569	-2.51286	0.0119757	0.201556	Diras2
ENSMUSG00000091811	522.503	0.769851	0.306431	2.51231	0.0119943	0.201675	Inafm1
ENSMUSG00000063229	3429.08	-0.554615	0.220814	-2.51169	0.0120156	0.201839	Ldha
ENSMUSG00000048600	15.1933	1.33958	0.533468	2.51109	0.0120361	0.201866	Gm5763
ENSMUSG00000015222	24436.8	-0.512295	0.204023	-2.51096	0.0120403	0.201866	Map2
ENSMUSG00000026141	349.492	-0.834396	0.332644	-2.50838	0.0121287	0.202571	Col19a1
ENSMUSG00000030621	801.495	-0.538199	0.214536	-2.50866	0.012119	0.202571	Me3
ENSMUSG00000025237	1980	-0.460104	0.183402	-2.50873	0.0121167	0.202571	Parp6
ENSMUSG00000067889	17680	-0.791968	0.315623	-2.50922	0.0120998	0.202571	Sptbn2
ENSMUSG00000036902	1686.74	-0.550917	0.21977	-2.50679	0.0121834	0.203096	Neto2
ENSMUSG00000030257	7695.49	-0.336866	0.134378	-2.50686	0.0121808	0.203096	Srgap3
ENSMUSG00000047394	42.594	1.08904	0.434515	2.50634	0.0121989	0.20316	Odf3b
ENSMUSG00000060716	1249.07	0.509563	0.203367	2.50563	0.0122232	0.203371	Plekhh1
ENSMUSG00000007379	13.937	-1.58547	0.633314	-2.50345	0.0122989	0.203468	Dennd2c
ENSMUSG00000030560	168.304	-0.553313	0.221	-2.50368	0.0122909	0.203468	Ctsc
ENSMUSG00000110444	282.509	-0.455068	0.181659	-2.50507	0.0122427	0.203468	Gm10033
ENSMUSG00000027984	386.239	0.338319	0.135137	2.50353	0.0122962	0.203468	Hadh
ENSMUSG00000027333	965.781	0.441065	0.176175	2.50356	0.0122951	0.203468	Smox
ENSMUSG00000005672	998.361	-0.586739	0.234351	-2.50368	0.012291	0.203468	Kit
ENSMUSG00000030322	207.204	-0.552127	0.220699	-2.50172	0.0123593	0.204274	Mbd4
ENSMUSG00000074063	13.5085	1.61946	0.647438	2.50134	0.0123723	0.204296	Osgin1
ENSMUSG00000021423	88.2962	-0.726492	0.290649	-2.49955	0.0124352	0.205012	Ly86
ENSMUSG00000040811	3114.71	0.571363	0.228627	2.4991	0.0124509	0.205012	Eml2
ENSMUSG00000045589	7598.4	-0.544081	0.217685	-2.49939	0.0124407	0.205012	Frrs1l
ENSMUSG00000074793	234.999	0.561705	0.224911	2.49746	0.0125088	0.205578	Hspa12b
ENSMUSG00000054280	1480.15	-0.313471	0.125501	-2.49776	0.012498	0.205578	Prr14l
ENSMUSG00000045038	8604.83	-0.600222	0.240484	-2.49589	0.0125641	0.206291	Prkce
ENSMUSG00000015468	319.059	0.572637	0.229566	2.49443	0.0126159	0.206949	Notch4
ENSMUSG00000048707	573.786	0.550359	0.22068	2.49392	0.0126341	0.207052	Tprn
ENSMUSG00000033102	324.635	0.460078	0.184548	2.493	0.0126669	0.207395	Cdc14b
ENSMUSG00000017697	58.3373	0.786711	0.316086	2.48892	0.0128133	0.207868	Ada
ENSMUSG00000072663	73.6151	0.643991	0.258654	2.48978	0.0127824	0.207868	Spef2
ENSMUSG00000031347	354.702	-0.333742	0.134027	-2.49011	0.0127702	0.207868	Cetn2
ENSMUSG00000031970	416.177	0.539814	0.216816	2.48973	0.0127841	0.207868	Dbndd1
ENSMUSG00000043448	469.687	0.848104	0.340595	2.49007	0.012772	0.207868	Gjc2
ENSMUSG00000027238	1009.64	0.292727	0.117613	2.48891	0.0128134	0.207868	Frmd5
ENSMUSG00000035934	1018.33	-0.627642	0.252041	-2.49024	0.0127657	0.207868	Pknox2
ENSMUSG00000030172	1039.02	-0.408322	0.163974	-2.49017	0.0127681	0.207868	Erc1
ENSMUSG00000037419	3244.32	0.476183	0.191324	2.48888	0.0128147	0.207868	Endod1
ENSMUSG00000058799	3685.17	-0.378367	0.15185	-2.49171	0.0127128	0.207868	Nap1l1
ENSMUSG00000082329	189.192	-0.834081	0.335246	-2.48797	0.0128475	0.208206	Gm14287
ENSMUSG00000102202	18.3448	-1.56785	0.631009	-2.48468	0.0129669	0.208506	Gm33280
ENSMUSG00000106073	20.3133	-1.47436	0.593796	-2.48295	0.0130299	0.208506	Gm42892
ENSMUSG00000037139	27.8082	-1.36855	0.551038	-2.48358	0.0130069	0.208506	Myom3
ENSMUSG00000047109	41.9353	0.924196	0.371824	2.48557	0.0129343	0.208506	Cldn14
ENSMUSG00000028307	53.0463	0.799628	0.32202	2.48316	0.0130222	0.208506	Aldob
ENSMUSG00000009621	388.893	0.512042	0.206177	2.48351	0.0130096	0.208506	Vav2
ENSMUSG00000023994	390.985	-0.513547	0.206646	-2.48516	0.0129493	0.208506	Nfya
ENSMUSG00000001507	704.616	0.618205	0.248627	2.48648	0.0129014	0.208506	Itga3
ENSMUSG00000057963	1442.71	0.30339	0.122143	2.48388	0.0129958	0.208506	Itpk1
ENSMUSG00000046230	1482.33	-0.511311	0.205914	-2.48312	0.0130236	0.208506	Vps13a
ENSMUSG00000000416	2584.75	-0.500046	0.201155	-2.48587	0.0129235	0.208506	Cttnbp2
ENSMUSG00000021913	2640.08	0.372947	0.150001	2.48631	0.0129077	0.208506	Ogdhl
ENSMUSG00000013663	3613.26	-0.481085	0.193762	-2.48286	0.0130331	0.208506	Pten
ENSMUSG00000037706	4999.14	0.49486	0.199137	2.48503	0.0129541	0.208506	Cd81
ENSMUSG00000033569	1902.27	-0.366255	0.1476	-2.48141	0.0130864	0.209167	Adgrb3
ENSMUSG00000037166	360.848	0.697937	0.28142	2.48005	0.0131364	0.209774	Ppp1r14a
ENSMUSG00000056999	1049.41	-0.236832	0.0955134	-2.47957	0.0131541	0.209865	Ide
ENSMUSG00000063887	1401.85	-0.553669	0.223328	-2.47917	0.0131688	0.209907	Nlgn1
ENSMUSG00000087075	34.1776	1.7114	0.690568	2.47826	0.0132026	0.210184	Lbhd2
ENSMUSG00000079109	310.109	-0.330688	0.133451	-2.47797	0.0132133	0.210184	Pms2
ENSMUSG00000072946	399.246	0.379896	0.153324	2.47773	0.0132222	0.210184	Ptgr2
ENSMUSG00000054976	1006.22	-0.584936	0.236123	-2.47726	0.0132397	0.210271	Nyap2
ENSMUSG00000115155	24.7381	-1.29182	0.521643	-2.47644	0.0132698	0.210557	Gm49182
ENSMUSG00000031351	42.4591	-0.746707	0.301564	-2.47611	0.0132821	0.210561	Zfp185
ENSMUSG00000036834	488.055	0.603046	0.243623	2.47533	0.0133114	0.210644	Plch1
ENSMUSG00000074733	1132.43	-0.492711	0.199029	-2.47558	0.0133021	0.210644	Zfp950
ENSMUSG00000048355	239.039	0.767875	0.310259	2.47495	0.0133254	0.210675	Arxes1
ENSMUSG00000000632	3841.54	-0.349126	0.141101	-2.4743	0.0133497	0.210867	Sez6
ENSMUSG00000087437	38.2788	1.56322	0.631961	2.47359	0.0133761	0.211094	Gm13112
ENSMUSG00000027298	2936.27	-0.61427	0.248414	-2.47277	0.0134071	0.211392	Tyro3
ENSMUSG00000072082	83.9897	-0.926199	0.374704	-2.47181	0.013443	0.211556	Ccnf
ENSMUSG00000030782	229.443	-0.447253	0.180958	-2.47158	0.0134517	0.211556	Tgfb1i1
ENSMUSG00000022710	3652.19	-0.352429	0.142596	-2.47152	0.0134538	0.211556	Usp7
ENSMUSG00000074794	1527.22	0.335413	0.135746	2.47088	0.013478	0.211746	Arrdc3
ENSMUSG00000005124	80.2143	-1.04632	0.423866	-2.46851	0.0135678	0.211823	Wisp1
ENSMUSG00000025400	123.823	0.793636	0.321475	2.46874	0.0135591	0.211823	Tac2
ENSMUSG00000034227	234.441	0.823372	0.333422	2.46946	0.0135317	0.211823	Foxj1
ENSMUSG00000060090	261.246	-0.491157	0.198932	-2.46897	0.0135503	0.211823	Rp2
ENSMUSG00000044716	383.502	0.504136	0.204153	2.46941	0.0135336	0.211823	Dok7
ENSMUSG00000032590	390.971	0.656463	0.265805	2.46972	0.0135218	0.211823	Apeh
ENSMUSG00000029471	4350.65	-0.813824	0.329528	-2.46967	0.0135238	0.211823	Camkk2
ENSMUSG00000006301	876.882	0.460571	0.186664	2.46738	0.0136107	0.212113	Tmbim1
ENSMUSG00000026643	2109.65	-0.444098	0.179987	-2.46739	0.0136103	0.212113	Nmt2
ENSMUSG00000030225	41.8561	0.919795	0.372879	2.46674	0.0136349	0.212155	Dera
ENSMUSG00000020275	175.891	-0.652259	0.264644	-2.46466	0.0137142	0.212155	Rel
ENSMUSG00000026142	208.245	0.436064	0.1768	2.46642	0.0136471	0.212155	Rhbdd1
ENSMUSG00000022856	234.975	0.404694	0.164113	2.46594	0.0136653	0.212155	Tmem41a
ENSMUSG00000040373	452.331	0.528697	0.214582	2.46385	0.0137455	0.212155	Cacng5
ENSMUSG00000004562	693.944	0.63198	0.256496	2.4639	0.0137435	0.212155	Arhgef40
ENSMUSG00000023089	879.304	0.40248	0.163235	2.46564	0.0136768	0.212155	Ndufa5
ENSMUSG00000024940	1034.81	0.653493	0.265122	2.46488	0.0137061	0.212155	Ltbp3
ENSMUSG00000024892	1684.06	0.453608	0.184108	2.46381	0.013747	0.212155	Pcx
ENSMUSG00000036699	2047.1	0.883698	0.358629	2.4641	0.0137358	0.212155	Zcchc12
ENSMUSG00000042406	2107.16	0.683818	0.277489	2.46431	0.0137279	0.212155	Atf4
ENSMUSG00000047658	774.957	-0.645697	0.262149	-2.46309	0.0137746	0.212394	Gal3st3
ENSMUSG00000109362	82.4832	-0.755012	0.306684	-2.46186	0.0138219	0.212769	Gm44562
ENSMUSG00000030123	1875.55	-0.828027	0.336347	-2.46182	0.0138233	0.212769	Plxnd1
ENSMUSG00000032481	1444.25	-0.317125	0.12884	-2.46138	0.0138402	0.212843	Smarcc1
ENSMUSG00000025225	70.5636	0.741421	0.301266	2.46102	0.0138544	0.212872	Nfkb2
ENSMUSG00000113121	64.2603	-1.60799	0.653695	-2.45985	0.0138995	0.213378	Gm35161
ENSMUSG00000032380	40.4634	0.889935	0.361934	2.45883	0.013939	0.213772	Dapk2
ENSMUSG00000036833	422.155	0.449108	0.182671	2.45856	0.0139497	0.213772	Pnpla7
ENSMUSG00000000384	667.433	0.316233	0.128688	2.45735	0.0139966	0.21402	Tbrg4
ENSMUSG00000043733	4762.18	0.255017	0.103773	2.45746	0.0139922	0.21402	Ptpn11
ENSMUSG00000026944	10194.9	0.342915	0.139555	2.4572	0.0140026	0.21402	Abca2
ENSMUSG00000020866	3044.71	0.628528	0.255824	2.45688	0.0140151	0.214024	Cacna1g
ENSMUSG00000064364	126.597	-1.03967	0.423334	-2.4559	0.0140532	0.214418	mt-Th
ENSMUSG00000074872	101.781	0.888352	0.361851	2.45502	0.0140876	0.21473	Ctxn2
ENSMUSG00000003934	2343.23	0.570398	0.232365	2.45475	0.0140982	0.21473	Efnb3
ENSMUSG00000039037	1291.78	-0.589195	0.240097	-2.45399	0.014128	0.214997	St6galnac5
ENSMUSG00000020758	362.706	0.652093	0.265821	2.45312	0.0141621	0.215141	Itgb4
ENSMUSG00000042524	1086.69	0.417756	0.170275	2.45342	0.0141507	0.215141	Sun2
ENSMUSG00000113769	12.6347	1.78528	0.72816	2.45176	0.0142159	0.215195	5033406O09Rik
ENSMUSG00000090008	12.3583	-1.524	0.621677	-2.45144	0.0142286	0.215195	Gm16111
ENSMUSG00000005968	63.8886	1.08351	0.442039	2.45116	0.0142396	0.215195	Tuft1
ENSMUSG00000103831	93.6634	-0.829157	0.338113	-2.45231	0.0141944	0.215195	Gm37608
ENSMUSG00000029701	1070.76	-0.287949	0.117427	-2.45215	0.0142006	0.215195	Rbm28
ENSMUSG00000021012	1376.01	-0.416354	0.169849	-2.45132	0.0142335	0.215195	Zc3h14
ENSMUSG00000029466	654.114	0.33076	0.134962	2.45076	0.0142555	0.215249	Anapc7
ENSMUSG00000017376	1828.45	-0.695513	0.283929	-2.4496	0.0143014	0.215757	Nlk
ENSMUSG00000026547	143.043	0.512802	0.209426	2.44861	0.014341	0.216016	Tagln2
ENSMUSG00000021108	305.155	0.745597	0.304506	2.44855	0.0143433	0.216016	Prkch
ENSMUSG00000026029	43.9285	-0.894153	0.365369	-2.44726	0.0143947	0.21606	Casp8
ENSMUSG00000102593	49.508	-0.708252	0.289556	-2.446	0.0144453	0.21606	Gm38384
ENSMUSG00000022665	110.052	-0.644601	0.263345	-2.44774	0.0143755	0.21606	Ccdc80
ENSMUSG00000085030	226.425	-0.766813	0.313383	-2.44689	0.0144095	0.21606	2810455O05Rik
ENSMUSG00000052551	655.406	0.359737	0.147069	2.44605	0.0144432	0.21606	Adarb2
ENSMUSG00000034544	969.208	0.332251	0.135796	2.44669	0.0144175	0.21606	Rsrc1
ENSMUSG00000026516	1567.79	-0.368755	0.150755	-2.44606	0.0144426	0.21606	Nvl
ENSMUSG00000021143	3797.16	0.44355	0.181309	2.44637	0.0144302	0.21606	Pacs2
ENSMUSG00000052144	1359.61	-0.279384	0.114242	-2.44556	0.0144629	0.216139	Ppp4r2
ENSMUSG00000105741	30.1074	-1.22859	0.502668	-2.44414	0.0145198	0.216805	C79130
ENSMUSG00000018841	372.255	0.379556	0.155344	2.44333	0.0145524	0.217105	Rad51d
ENSMUSG00000022978	64.9657	-0.682496	0.279522	-2.44166	0.01462	0.217742	Mis18a
ENSMUSG00000043301	543.425	-0.610097	0.249866	-2.44169	0.0146185	0.217742	Kcnj6
ENSMUSG00000030337	5337.56	0.886858	0.363279	2.44126	0.0146362	0.217797	Vamp1
ENSMUSG00000044626	13.7366	-1.27271	0.521839	-2.4389	0.014732	0.218784	Liph
ENSMUSG00000001119	1006.53	-0.710309	0.291265	-2.4387	0.01474	0.218784	Col6a1
ENSMUSG00000031605	3364.58	-0.449127	0.184126	-2.43924	0.0147181	0.218784	Klhl2
ENSMUSG00000030124	63.6761	-0.698713	0.286706	-2.43703	0.0148084	0.219125	Lag3
ENSMUSG00000020689	71.3519	-0.881951	0.361831	-2.43747	0.0147905	0.219125	Itgb3
ENSMUSG00000020090	74.4547	0.840031	0.34465	2.43734	0.0147956	0.219125	Npffr1
ENSMUSG00000021069	102.765	0.545375	0.223797	2.43691	0.0148132	0.219125	Pygl
ENSMUSG00000009569	5633.2	-0.730089	0.299714	-2.43595	0.0148526	0.219522	Mkl2
ENSMUSG00000030098	896.265	0.594803	0.244234	2.43538	0.014876	0.219682	Grip2
ENSMUSG00000002058	369.275	0.639829	0.262759	2.43505	0.0148899	0.219702	Unc119
ENSMUSG00000006567	101.16	0.613729	0.252106	2.4344	0.0149163	0.219874	Atp7b
ENSMUSG00000021071	6641.83	-0.477337	0.1961	-2.43415	0.0149268	0.219874	Trim9
ENSMUSG00000036962	14.4864	1.37166	0.563958	2.43221	0.0150072	0.220687	Cfap221
ENSMUSG00000028033	1690.74	-0.903631	0.371506	-2.43235	0.0150013	0.220687	Kcnq5
ENSMUSG00000053441	36.7059	1.23067	0.506173	2.43132	0.0150439	0.220855	Adamts19
ENSMUSG00000097392	462.531	-0.327161	0.13456	-2.43134	0.0150432	0.220855	D930016D06Rik
ENSMUSG00000110574	14.0917	-1.63325	0.672264	-2.42947	0.015121	0.22154	Gm21112
ENSMUSG00000101249	293.12	-0.740995	0.304951	-2.42988	0.0151036	0.22154	Gm29216
ENSMUSG00000055945	1611.46	0.701232	0.288658	2.42928	0.0151286	0.22154	Prr18
ENSMUSG00000073154	34.3999	1.12746	0.4643	2.42831	0.0151695	0.221581	9330158H04Rik
ENSMUSG00000108752	57.2832	-1.03837	0.427569	-2.42853	0.01516	0.221581	Gm45191
ENSMUSG00000030376	4684.69	-0.841681	0.346549	-2.42875	0.0151509	0.221581	Slc8a2
ENSMUSG00000041361	29.3452	0.973326	0.400893	2.4279	0.0151867	0.221647	Myzap
ENSMUSG00000039238	15.0164	1.16103	0.47863	2.42573	0.0152777	0.222307	Zfp750
ENSMUSG00000022438	620.518	0.331845	0.136762	2.42643	0.0152481	0.222307	Parvb
ENSMUSG00000033960	3146.92	-0.616982	0.254338	-2.42583	0.0152733	0.222307	Jcad
ENSMUSG00000021557	4455.41	-0.450574	0.185757	-2.42561	0.0152828	0.222307	Agtpbp1
ENSMUSG00000020849	11877.1	-0.36807	0.151817	-2.42444	0.0153321	0.222838	Ywhae
ENSMUSG00000025064	22.8295	-1.23191	0.508377	-2.42322	0.0153835	0.223029	Col17a1
ENSMUSG00000052353	390.58	-0.706047	0.291334	-2.42349	0.015372	0.223029	Cemip
ENSMUSG00000019947	1367.94	0.286073	0.118054	2.42324	0.0153827	0.223029	Arid5b
ENSMUSG00000056529	25.8355	-0.997719	0.411822	-2.4227	0.0154058	0.223117	Ptafr
ENSMUSG00000040536	2332.45	-0.50422	0.208142	-2.42248	0.0154151	0.223117	Necab1
ENSMUSG00000026175	16.1311	1.40026	0.578518	2.42042	0.0155024	0.223371	Vil1
ENSMUSG00000044551	37.7026	0.813469	0.336108	2.42026	0.0155094	0.223371	9930012K11Rik
ENSMUSG00000072812	74.2261	0.938512	0.387714	2.42063	0.0154936	0.223371	Ahnak2
ENSMUSG00000037820	204.65	0.523511	0.216285	2.42046	0.0155007	0.223371	Tgm2
ENSMUSG00000032841	383.14	0.573476	0.236822	2.42155	0.0154545	0.223371	Prr5l
ENSMUSG00000038323	530.776	-0.288208	0.119046	-2.42097	0.0154792	0.223371	1700066M21Rik
ENSMUSG00000018648	688.557	-0.763733	0.315716	-2.41905	0.0155609	0.223787	Dusp14
ENSMUSG00000029840	5806.15	-0.540169	0.223304	-2.41898	0.0155639	0.223787	Mtpn
ENSMUSG00000006724	13.1992	-1.38234	0.571888	-2.41715	0.0156424	0.224362	Cyp27b1
ENSMUSG00000044534	27.633	-1.40776	0.582375	-2.41728	0.015637	0.224362	Ackr2
ENSMUSG00000005125	2114.24	0.385474	0.159465	2.4173	0.0156363	0.224362	Ndrg1
ENSMUSG00000105592	17.6465	-1.11575	0.461662	-2.4168	0.0156575	0.224394	Gm42527
ENSMUSG00000083282	956.624	0.524458	0.217034	2.41648	0.0156714	0.224409	Ctsf
ENSMUSG00000043621	59.5726	0.823469	0.340923	2.41541	0.0157174	0.224773	Ubxn10
ENSMUSG00000034206	194.584	-0.714067	0.295681	-2.415	0.0157354	0.224773	Polq
ENSMUSG00000021144	1315.98	-0.261626	0.108322	-2.41525	0.0157245	0.224773	Mta1
ENSMUSG00000022385	19.6902	1.68698	0.699889	2.41035	0.0159371	0.224841	Gtse1
ENSMUSG00000019762	23.4515	1.36121	0.564781	2.41015	0.0159461	0.224841	Iyd
ENSMUSG00000112556	24.0701	-1.20782	0.500874	-2.41142	0.0158907	0.224841	Gm47339
ENSMUSG00000083734	33.9352	-0.849643	0.352133	-2.41285	0.0158285	0.224841	Gm16209
ENSMUSG00000073733	38.872	0.790611	0.327748	2.41225	0.0158543	0.224841	Rsg1
ENSMUSG00000040167	52.9323	-0.692111	0.28695	-2.41196	0.0158672	0.224841	Ikzf5
ENSMUSG00000020381	70.9889	0.764791	0.317003	2.41257	0.0158406	0.224841	Mrnip
ENSMUSG00000031887	79.1888	0.652204	0.270419	2.41183	0.0158729	0.224841	Tradd
ENSMUSG00000003282	102.139	-0.543391	0.225165	-2.4133	0.0158089	0.224841	Plag1
ENSMUSG00000026840	260.462	0.425777	0.176348	2.41441	0.0157609	0.224841	Lamc3
ENSMUSG00000067578	508.375	0.496646	0.206007	2.41081	0.015917	0.224841	Cbln4
ENSMUSG00000031642	781.193	-0.453527	0.188136	-2.41064	0.0159245	0.224841	Sh3rf1
ENSMUSG00000050967	2288.79	-0.601489	0.24942	-2.41155	0.0158847	0.224841	Creg2
ENSMUSG00000041037	2364.47	-0.235736	0.0977593	-2.4114	0.0158916	0.224841	Irgq
ENSMUSG00000020331	5059.55	0.575802	0.238864	2.41059	0.0159269	0.224841	Hcn2
ENSMUSG00000031517	20763.3	-0.532986	0.221018	-2.41151	0.0158866	0.224841	Gpm6a
ENSMUSG00000001420	14.0066	1.50109	0.623962	2.40574	0.0161397	0.225736	Tmem79
ENSMUSG00000085105	19.8101	-1.18264	0.491912	-2.40416	0.0162095	0.225736	Gm12758
ENSMUSG00000028755	38.9203	1.50811	0.627127	2.4048	0.0161815	0.225736	Cda
ENSMUSG00000037405	53.5285	0.743015	0.308656	2.40726	0.0160727	0.225736	Icam1
ENSMUSG00000002289	80.2934	0.894087	0.37139	2.40741	0.0160661	0.225736	Angptl4
ENSMUSG00000034701	196.07	-0.769564	0.319776	-2.40657	0.0161032	0.225736	Neurod1
ENSMUSG00000036678	220.279	0.455486	0.189388	2.40504	0.0161706	0.225736	Aaas
ENSMUSG00000024211	308.38	-0.470915	0.195664	-2.40675	0.0160952	0.225736	Grm8
ENSMUSG00000034620	473.668	0.324194	0.134627	2.4081	0.0160358	0.225736	Tmem5
ENSMUSG00000028218	766.839	-0.375015	0.155991	-2.40409	0.0162128	0.225736	Fam92a
ENSMUSG00000052516	2360.3	-0.666141	0.276981	-2.40501	0.0161722	0.225736	Robo2
ENSMUSG00000104597	3195.77	-0.611226	0.254065	-2.40579	0.0161375	0.225736	B230334C09Rik
ENSMUSG00000065954	4746.35	-0.524712	0.218265	-2.40401	0.0162163	0.225736	Tacc1
ENSMUSG00000039485	7739.82	0.338631	0.140848	2.40423	0.0162067	0.225736	Tspyl4
ENSMUSG00000041444	8353.55	-0.693452	0.288163	-2.40645	0.0161082	0.225736	Arhgap32
ENSMUSG00000029120	10307.1	-0.445943	0.185257	-2.40715	0.0160774	0.225736	Ppp2r2c
ENSMUSG00000049744	116.518	-1.13281	0.471405	-2.40304	0.0162593	0.226155	Arhgap15
ENSMUSG00000037343	874.108	-0.360648	0.150117	-2.40245	0.0162856	0.226339	Taf2
ENSMUSG00000022607	2098.44	-0.52589	0.218942	-2.40195	0.0163078	0.226468	Ptk2
ENSMUSG00000102336	98.4371	-1.01013	0.420767	-2.4007	0.0163639	0.226849	Gm37233
ENSMUSG00000051166	2350.39	-0.42225	0.175903	-2.40047	0.0163742	0.226849	Eml5
ENSMUSG00000020524	9305.8	-0.40497	0.168668	-2.40099	0.0163508	0.226849	Gria1
ENSMUSG00000039145	3202.44	-0.51449	0.214369	-2.40002	0.0163943	0.226948	Camk1d
ENSMUSG00000104178	14.061	-1.12673	0.469676	-2.39895	0.0164423	0.227432	Gm9916
ENSMUSG00000058355	1876	-0.340379	0.141911	-2.39854	0.0164604	0.227503	Abce1
ENSMUSG00000108037	34.8951	-0.908946	0.379145	-2.39736	0.0165139	0.22783	Gm44597
ENSMUSG00000019080	91.0063	0.450006	0.187739	2.39697	0.0165311	0.22783	Mfsd3
ENSMUSG00000008540	134.337	0.861274	0.359382	2.39654	0.0165505	0.22783	Mgst1
ENSMUSG00000028886	728.443	-0.279497	0.116666	-2.3957	0.0165885	0.22783	Eya3
ENSMUSG00000001334	1727.62	0.414158	0.172801	2.39673	0.0165421	0.22783	Fndc5
ENSMUSG00000059003	3558.78	-0.756486	0.315715	-2.3961	0.0165704	0.22783	Grin2a
ENSMUSG00000008734	3850.37	0.475667	0.1984	2.39751	0.0165069	0.22783	Gprc5b
ENSMUSG00000041268	5364.09	-0.414527	0.173018	-2.39586	0.0165816	0.22783	Dmxl2
ENSMUSG00000037465	448.507	-0.858129	0.358414	-2.39424	0.0166549	0.228386	Klf10
ENSMUSG00000040720	1003.91	-0.313268	0.130843	-2.39424	0.0166551	0.228386	Virma
ENSMUSG00000084898	73.1294	-1.07955	0.450993	-2.39371	0.0166789	0.228533	Gm12371
ENSMUSG00000073633	53.6125	0.635377	0.265555	2.39264	0.0167278	0.22888	Fbxo36
ENSMUSG00000030739	1150.74	0.564451	0.235917	2.39258	0.0167304	0.22888	Myh14
ENSMUSG00000042353	99.0842	1.02319	0.427752	2.39202	0.0167561	0.229053	Frem3
ENSMUSG00000060240	3644.23	0.631645	0.264113	2.39157	0.0167766	0.229153	Cend1
ENSMUSG00000020309	142.425	-0.446666	0.186843	-2.39059	0.0168212	0.229221	Chac2
ENSMUSG00000030309	294.949	0.353754	0.147993	2.39035	0.0168325	0.229221	Caprin2
ENSMUSG00000041205	1074.64	-0.425926	0.178188	-2.39031	0.016834	0.229221	Map6d1
ENSMUSG00000035401	1517.23	-0.47756	0.199772	-2.39052	0.0168245	0.229221	Emsy
ENSMUSG00000002458	272.846	-0.362773	0.151882	-2.38852	0.0169163	0.230161	Rgs19
ENSMUSG00000106446	19.6299	-1.21723	0.510373	-2.38498	0.01708	0.231428	Gm42970
ENSMUSG00000047242	596.857	-0.366779	0.153763	-2.38536	0.0170624	0.231428	Taf9b
ENSMUSG00000015714	1311.38	0.435719	0.182707	2.38479	0.0170888	0.231428	Cers2
ENSMUSG00000024068	1361.23	-0.224985	0.094333	-2.38501	0.0170786	0.231428	Spast
ENSMUSG00000026842	1679.92	0.262587	0.110103	2.38491	0.0170832	0.231428	Abl1
ENSMUSG00000049044	7351.26	-0.633437	0.265495	-2.38587	0.0170386	0.231428	Rapgef4
ENSMUSG00000020620	665.606	-0.508933	0.213512	-2.38362	0.0171431	0.231726	Abca8b
ENSMUSG00000027109	1065.92	-0.384643	0.161365	-2.38368	0.0171403	0.231726	Sp3
ENSMUSG00000057880	8364.6	0.389643	0.163478	2.38346	0.0171507	0.231726	Abat
ENSMUSG00000031165	17.9607	-1.18481	0.497299	-2.3825	0.0171955	0.232028	Was
ENSMUSG00000029697	20.8063	2.1524	0.903669	2.38185	0.0172259	0.232028	Fezf1
ENSMUSG00000049800	538.957	-0.430973	0.180941	-2.38185	0.0172261	0.232028	Sertad2
ENSMUSG00000038650	538.364	0.433773	0.182115	2.38186	0.0172256	0.232028	Rnh1
ENSMUSG00000015090	13738.3	0.653619	0.274503	2.3811	0.0172608	0.232317	Ptgds
ENSMUSG00000043832	16.8005	-1.5901	0.668	-2.38038	0.0172946	0.232592	Clec4a3
ENSMUSG00000056153	516.303	0.403837	0.16968	2.37999	0.0173129	0.232659	Socs6
ENSMUSG00000050052	348.909	-0.456323	0.191872	-2.37826	0.0173944	0.233574	Tdrp
ENSMUSG00000029798	163.297	-0.766007	0.322319	-2.37655	0.0174755	0.234123	Herc6
ENSMUSG00000018761	533.258	0.268129	0.112805	2.37692	0.0174576	0.234123	Mpdu1
ENSMUSG00000025823	662.181	-0.429845	0.180863	-2.37664	0.0174712	0.234123	Pdia4
ENSMUSG00000000223	1703.82	-0.425815	0.179261	-2.37539	0.0175305	0.234681	Drp2
ENSMUSG00000052581	266.867	-0.396444	0.166974	-2.37429	0.017583	0.235022	Lrrtm4
ENSMUSG00000029580	16382.4	-0.366395	0.154302	-2.37453	0.0175714	0.235022	Actb
ENSMUSG00000021276	675.252	-0.441448	0.186015	-2.37318	0.0176355	0.235545	Cinp
ENSMUSG00000104951	38.6708	-0.819292	0.345328	-2.3725	0.0176681	0.235619	Gm43413
ENSMUSG00000032127	1437.29	0.267733	0.112845	2.37257	0.0176649	0.235619	Vps11
ENSMUSG00000023800	940.061	-0.888421	0.37463	-2.37146	0.017718	0.236105	Tiam2
ENSMUSG00000071647	261.724	0.736858	0.31078	2.371	0.0177402	0.23622	Eml3
ENSMUSG00000078234	549.944	0.429407	0.181144	2.37053	0.0177625	0.236338	Klhdc7a
ENSMUSG00000098098	33.1955	0.95054	0.401128	2.36967	0.0178039	0.236348	Bvht
ENSMUSG00000023267	46.9096	0.894538	0.377475	2.36979	0.017798	0.236348	Gabrr2
ENSMUSG00000027630	1648.21	-0.428108	0.180651	-2.3698	0.0177975	0.236348	Tbl1xr1
ENSMUSG00000037661	13.3246	1.43516	0.605785	2.36909	0.0178319	0.236361	Gpr160
ENSMUSG00000028634	2011.1	-0.539	0.227501	-2.36922	0.0178254	0.236361	Hivep3
ENSMUSG00000037280	339.199	0.665482	0.281013	2.36815	0.0178772	0.236427	Galnt6
ENSMUSG00000019906	524.173	-0.382553	0.161513	-2.36856	0.0178575	0.236427	Lin7a
ENSMUSG00000030000	6425.11	-0.288368	0.121769	-2.36815	0.0178775	0.236427	Add2
ENSMUSG00000031775	183.162	0.731036	0.308748	2.36775	0.0178967	0.236481	Pllp
ENSMUSG00000050663	546.873	-0.632973	0.267359	-2.3675	0.0179086	0.236481	Trhde
ENSMUSG00000018470	940.117	0.750279	0.316974	2.36701	0.0179327	0.236619	Kcnab3
ENSMUSG00000050824	14.8651	1.4173	0.599028	2.366	0.0179817	0.236908	Sstr5
ENSMUSG00000034245	2445.09	0.515047	0.217669	2.36619	0.0179723	0.236908	Hdac11
ENSMUSG00000108591	178.132	0.494397	0.209139	2.36396	0.0180807	0.237549	Particl
ENSMUSG00000020183	510.523	0.431947	0.182736	2.36377	0.01809	0.237549	Cpm
ENSMUSG00000039512	784.698	0.345646	0.146224	2.36381	0.018088	0.237549	Uhrf1bp1
ENSMUSG00000042082	894.746	-0.372928	0.157745	-2.36412	0.0180732	0.237549	Arsb
ENSMUSG00000055078	1097.96	-0.515047	0.217908	-2.3636	0.0180984	0.237549	Gabra5
ENSMUSG00000019831	3484.79	-0.666213	0.28193	-2.36304	0.0181257	0.237552	Wasf1
ENSMUSG00000019852	4097.22	-0.377503	0.159749	-2.3631	0.0181227	0.237552	Arfgef3
ENSMUSG00000114277	26.2411	0.983274	0.41629	2.36199	0.0181769	0.237688	Gm48583
ENSMUSG00000002781	316.598	0.46831	0.198269	2.362	0.0181768	0.237688	Tmem143
ENSMUSG00000039458	928.019	-0.690305	0.29219	-2.36252	0.0181511	0.237688	Mtmr12
ENSMUSG00000026739	827.09	-0.356571	0.151035	-2.36086	0.0182328	0.23824	Bmi1
ENSMUSG00000036106	180.759	0.755244	0.319942	2.36057	0.018247	0.238248	Prr5
ENSMUSG00000115625	19.9091	-1.57829	0.668701	-2.36023	0.0182637	0.238287	2900040C04Rik
ENSMUSG00000049420	283	-0.400213	0.169598	-2.35978	0.018286	0.2384	Tmem200a
ENSMUSG00000039079	73.2673	0.926568	0.392764	2.3591	0.0183194	0.23848	Trhr2
ENSMUSG00000046157	793.974	0.408099	0.172978	2.35926	0.0183114	0.23848	Tmem229b
ENSMUSG00000039474	2443.09	-0.447001	0.189569	-2.35798	0.0183746	0.238843	Wfs1
ENSMUSG00000026341	3602.4	-0.290337	0.123118	-2.3582	0.0183638	0.238843	Actr3
ENSMUSG00000067199	250.58	0.575016	0.243905	2.35754	0.0183966	0.238951	Frat1
ENSMUSG00000110447	19.9559	-1.12092	0.475951	-2.35512	0.0185168	0.23992	Gm31518
ENSMUSG00000021280	30.6863	1.37252	0.582826	2.35493	0.0185262	0.23992	Exoc3l4
ENSMUSG00000014959	1583.28	-0.235746	0.100079	-2.35559	0.0184932	0.23992	Gorasp2
ENSMUSG00000041708	2542.14	-0.91156	0.387025	-2.3553	0.0185078	0.23992	Mpped1
ENSMUSG00000068323	110.467	-0.972438	0.413055	-2.35426	0.0185597	0.240176	Slc4a5
ENSMUSG00000050530	1532.62	-0.373357	0.158625	-2.35372	0.0185867	0.240347	Fam171a1
ENSMUSG00000103076	16.1906	-1.43379	0.609334	-2.35305	0.0186201	0.240424	Gm37902
ENSMUSG00000108053	23.0555	1.12806	0.479398	2.35308	0.0186186	0.240424	Gm43890
ENSMUSG00000008398	146.425	-0.52948	0.225248	-2.35065	0.0187404	0.240555	Elk3
ENSMUSG00000027875	191.361	0.600696	0.255483	2.35122	0.0187121	0.240555	Hmgcs2
ENSMUSG00000026155	754.28	-0.313693	0.133385	-2.35179	0.0186833	0.240555	Smap1
ENSMUSG00000002831	785.967	1.467	0.623647	2.35229	0.0186584	0.240555	Plin4
ENSMUSG00000032384	955.495	-0.48173	0.204923	-2.35079	0.0187337	0.240555	Csnk1g1
ENSMUSG00000078591	971.832	-0.401991	0.170938	-2.35167	0.0186892	0.240555	Hs3st4
ENSMUSG00000022861	1265.1	-0.683838	0.290735	-2.3521	0.0186679	0.240555	Dgkg
ENSMUSG00000058254	13763.2	-0.410297	0.174526	-2.35092	0.018727	0.240555	Tspan7
ENSMUSG00000081683	50.5697	1.07215	0.456468	2.34879	0.0188346	0.241233	Fzd10
ENSMUSG00000060402	304.032	0.705844	0.300503	2.34888	0.0188301	0.241233	Chst8
ENSMUSG00000068206	339.877	0.367463	0.156441	2.34889	0.0188294	0.241233	Pick1
ENSMUSG00000040918	394.567	0.358117	0.152519	2.34801	0.0188738	0.241557	Slc19a2
ENSMUSG00000104546	131.943	-0.561318	0.239122	-2.34741	0.0189043	0.241593	Gm43858
ENSMUSG00000042505	231.434	0.373078	0.158922	2.34755	0.0188972	0.241593	Sdhaf3
ENSMUSG00000021257	208.895	0.484864	0.20658	2.3471	0.0189204	0.241622	Angel1
ENSMUSG00000024011	27.749	1.30141	0.554821	2.34564	0.0189942	0.242376	Pi16
ENSMUSG00000050002	319.61	0.418357	0.178395	2.34512	0.019021	0.242376	Idnk
ENSMUSG00000031980	1656.98	1.5197	0.64798	2.34528	0.0190127	0.242376	Agt
ENSMUSG00000042489	49.8613	-1.42362	0.607184	-2.34463	0.0190459	0.242516	Clspn
ENSMUSG00000111375	2065.52	-0.587928	0.250804	-2.34417	0.0190694	0.242638	Btbd8
ENSMUSG00000053141	4115.48	-0.549894	0.234637	-2.34359	0.0190991	0.24284	Ptprt
ENSMUSG00000054051	870.658	-0.351298	0.149916	-2.34329	0.0191144	0.242857	Ercc6
ENSMUSG00000016386	534.688	-0.394638	0.168453	-2.34272	0.0191436	0.243051	Mpped2
ENSMUSG00000027890	115.219	0.459234	0.196078	2.3421	0.0191756	0.243281	Gstm4
ENSMUSG00000077167	16.9865	-1.21617	0.519767	-2.33984	0.0192919	0.243549	Gm24119
ENSMUSG00000053835	301.78	-0.593891	0.253749	-2.34046	0.0192598	0.243549	H2-T24
ENSMUSG00000032554	533.716	0.497229	0.212534	2.33953	0.0193082	0.243549	Trf
ENSMUSG00000034413	816.784	-0.72341	0.309191	-2.33969	0.0192999	0.243549	Neurl1b
ENSMUSG00000028804	1791.15	-0.256694	0.109675	-2.34051	0.0192573	0.243549	Csmd2
ENSMUSG00000031626	3818.81	-0.776632	0.33184	-2.34038	0.0192642	0.243549	Sorbs2
ENSMUSG00000040560	4277.82	-0.3262	0.139331	-2.34119	0.0192224	0.243549	Wdr7
ENSMUSG00000006782	8452.05	0.511813	0.218731	2.33992	0.019288	0.243549	Cnp
ENSMUSG00000027115	22.6032	-0.921124	0.393819	-2.33895	0.0193378	0.243746	Kif18a
ENSMUSG00000074466	48.5333	1.15362	0.493338	2.3384	0.0193664	0.243789	Gm15417
ENSMUSG00000075602	351.594	0.568217	0.242999	2.33835	0.0193692	0.243789	Ly6a
ENSMUSG00000006599	750.569	-0.330231	0.141246	-2.33798	0.0193884	0.243855	Gtf2h1
ENSMUSG00000091735	286.694	0.801349	0.342804	2.33763	0.0194066	0.243909	Gpr62
ENSMUSG00000063506	57.5514	0.638006	0.273023	2.33682	0.0194484	0.244106	Arhgap22
ENSMUSG00000044646	170.443	0.62372	0.266944	2.33652	0.019464	0.244106	Zbtb7c
ENSMUSG00000032714	212.326	0.753498	0.322487	2.33652	0.0194642	0.244106	Syde1
ENSMUSG00000055809	27.804	1.10345	0.472468	2.33551	0.0195169	0.24424	Dnaaf3
ENSMUSG00000096351	39.2916	0.952147	0.407664	2.33562	0.0195112	0.24424	Samd11
ENSMUSG00000096740	84.6165	0.486582	0.208339	2.33553	0.0195157	0.24424	Lbhd1
ENSMUSG00000031828	145.544	0.463835	0.198631	2.33516	0.019535	0.244293	Klhl36
ENSMUSG00000022223	324.298	0.452836	0.19395	2.3348	0.0195537	0.244351	Sdr39u1
ENSMUSG00000109625	44.2483	-1.16771	0.500919	-2.33113	0.0197463	0.244484	3110080E11Rik
ENSMUSG00000031075	130.582	0.790679	0.339116	2.33159	0.0197224	0.244484	Ano1
ENSMUSG00000028464	154.047	0.44266	0.18988	2.33126	0.0197397	0.244484	Tpm2
ENSMUSG00000018861	243.035	0.661094	0.283386	2.33284	0.0196565	0.244484	Fdxr
ENSMUSG00000021680	258.265	-0.724106	0.310419	-2.33267	0.0196655	0.244484	Crhbp
ENSMUSG00000038685	461.008	0.442062	0.189605	2.33149	0.0197273	0.244484	Rtel1
ENSMUSG00000030256	716.727	0.555768	0.238228	2.33292	0.0196521	0.244484	Bhlhe41
ENSMUSG00000001138	755.481	0.241715	0.103647	2.3321	0.0196952	0.244484	Cnnm3
ENSMUSG00000022270	957.806	0.29551	0.126755	2.33134	0.0197356	0.244484	Retreg1
ENSMUSG00000028944	1471.44	-0.399518	0.171214	-2.33344	0.0196248	0.244484	Prkag2
ENSMUSG00000026207	3227.48	-0.494102	0.211791	-2.33297	0.0196498	0.244484	Speg
ENSMUSG00000028645	3301.32	0.404843	0.173475	2.33372	0.0196102	0.244484	Slc2a1
ENSMUSG00000075318	7335.59	-0.564862	0.242246	-2.33177	0.019713	0.244484	Scn2a
ENSMUSG00000044352	1414.69	-0.623113	0.267426	-2.33004	0.0198041	0.244725	Sowaha
ENSMUSG00000055675	2264.93	-0.339733	0.14581	-2.32997	0.0198077	0.244725	Kbtbd11
ENSMUSG00000022636	3688.09	-0.481799	0.206763	-2.33019	0.0197959	0.244725	Alcam
ENSMUSG00000087221	33.8359	0.768583	0.329958	2.32934	0.0198412	0.244866	BC037032
ENSMUSG00000112825	88.7566	-1.03581	0.444754	-2.32896	0.0198612	0.244866	Gm9118
ENSMUSG00000026585	5952.46	-0.260261	0.111746	-2.32904	0.0198571	0.244866	Kifap3
ENSMUSG00000034998	369.001	-0.431406	0.185302	-2.32813	0.0199051	0.245235	Foxn2
ENSMUSG00000028710	746.433	0.321355	0.138086	2.3272	0.0199547	0.245499	Atpaf1
ENSMUSG00000020810	1156.2	0.709928	0.305052	2.32724	0.0199525	0.245499	Cygb
ENSMUSG00000087526	29.7702	-0.919607	0.39529	-2.32641	0.0199966	0.245582	Gm15738
ENSMUSG00000052609	802.83	0.458148	0.196967	2.32602	0.0200177	0.245582	Plekhg3
ENSMUSG00000026819	1383.72	0.348461	0.149766	2.3267	0.0199815	0.245582	Slc25a25
ENSMUSG00000054728	8243.14	-0.702151	0.301851	-2.32615	0.0200107	0.245582	Phactr1
ENSMUSG00000028583	139.235	-0.518055	0.222982	-2.3233	0.0201629	0.245744	Pdpn
ENSMUSG00000039908	151.831	0.743569	0.319805	2.32507	0.0200682	0.245744	Slc26a11
ENSMUSG00000027962	514.208	-0.387693	0.166883	-2.32314	0.0201716	0.245744	Vcam1
ENSMUSG00000044950	559.089	-0.385421	0.165861	-2.32376	0.0201384	0.245744	Pwwp2a
ENSMUSG00000047084	590.047	0.368482	0.158582	2.32361	0.0201462	0.245744	Ngrn
ENSMUSG00000020024	766.378	-0.364152	0.156612	-2.32519	0.0200617	0.245744	Cep83
ENSMUSG00000039988	1812.53	-0.275118	0.11841	-2.32345	0.0201551	0.245744	Ankrd13c
ENSMUSG00000042350	2769.49	-0.542239	0.233263	-2.32458	0.0200943	0.245744	Arel1
ENSMUSG00000060371	6140.72	-0.472748	0.203409	-2.32412	0.020119	0.245744	Caln1
ENSMUSG00000026833	12724.1	-0.653716	0.281177	-2.32493	0.0200758	0.245744	Olfm1
ENSMUSG00000103693	27.6419	-0.858647	0.369707	-2.32251	0.0202056	0.245772	Gm37529
ENSMUSG00000051343	2107.19	0.455743	0.196226	2.32255	0.0202036	0.245772	Rab11fip5
ENSMUSG00000068036	2379.48	-0.281877	0.121378	-2.32231	0.0202161	0.245772	Afdn
ENSMUSG00000052921	362.175	0.413931	0.178288	2.32171	0.0202488	0.245999	Arhgef15
ENSMUSG00000109370	39.4612	-0.807821	0.34851	-2.31793	0.0204534	0.246115	Gm44675
ENSMUSG00000026679	45.3895	0.866125	0.373574	2.31848	0.020423	0.246115	Enkur
ENSMUSG00000113186	46.7364	1.33875	0.577337	2.31884	0.0204036	0.246115	A330076C08Rik
ENSMUSG00000020327	64.1724	0.903544	0.389493	2.31979	0.0203521	0.246115	Fgf22
ENSMUSG00000030471	364.382	-0.431373	0.186123	-2.31767	0.0204671	0.246115	Zdhhc13
ENSMUSG00000066235	703.332	0.415009	0.178949	2.31915	0.0203867	0.246115	Pomgnt2
ENSMUSG00000069094	724.139	-0.394443	0.170163	-2.31803	0.020448	0.246115	Pde7a
ENSMUSG00000030515	815.202	-0.359571	0.155024	-2.31945	0.0203708	0.246115	Tarsl2
ENSMUSG00000046711	862.631	0.596039	0.257084	2.31846	0.0204246	0.246115	Hmga1
ENSMUSG00000044912	1344.29	-0.645927	0.278733	-2.31737	0.0204837	0.246115	Syt16
ENSMUSG00000024242	1519.55	-0.372598	0.160655	-2.31924	0.020382	0.246115	Map4k3
ENSMUSG00000057715	1594.23	-0.531028	0.229088	-2.31801	0.020449	0.246115	A830018L16Rik
ENSMUSG00000030279	1666.26	-0.357425	0.154235	-2.31741	0.0204814	0.246115	C2cd5
ENSMUSG00000003534	1764.03	0.59368	0.255962	2.31941	0.0203729	0.246115	Ddr1
ENSMUSG00000052534	3636.59	-0.357772	0.154234	-2.31966	0.020359	0.246115	Pbx1
ENSMUSG00000027351	4470.83	-0.317266	0.136841	-2.31849	0.0204225	0.246115	Spred1
ENSMUSG00000111837	79.8306	-0.669256	0.28885	-2.31697	0.0205054	0.246205	Gm47135
ENSMUSG00000020598	6985.36	-0.494265	0.213398	-2.31616	0.0205495	0.246566	Nrcam
ENSMUSG00000022441	162.865	-0.892429	0.38545	-2.31529	0.0205969	0.246665	Efcab6
ENSMUSG00000042348	702.026	-0.582761	0.2517	-2.3153	0.0205964	0.246665	Arl15
ENSMUSG00000022285	17743.2	-0.441041	0.190495	-2.31523	0.0206001	0.246665	Ywhaz
ENSMUSG00000104443	25.1259	-0.892341	0.385644	-2.3139	0.0206732	0.246695	4932442E05Rik
ENSMUSG00000006705	317.38	-0.305485	0.132007	-2.31416	0.020659	0.246695	Pknox1
ENSMUSG00000042662	550.718	0.511677	0.221118	2.31404	0.0206655	0.246695	Dusp15
ENSMUSG00000055003	1245.66	0.470311	0.203182	2.31473	0.0206278	0.246695	Lrtm2
ENSMUSG00000024122	3116.55	-0.274103	0.118422	-2.31462	0.0206338	0.246695	Pdpk1
ENSMUSG00000034522	291.908	0.520157	0.224875	2.3131	0.0207172	0.246697	Zfp395
ENSMUSG00000035469	1232.82	0.351135	0.151805	2.31306	0.0207193	0.246697	Rcbtb1
ENSMUSG00000020300	3133.32	-0.434902	0.187993	-2.3134	0.0207009	0.246697	Cpeb4
ENSMUSG00000040097	4322	0.440476	0.190446	2.31287	0.0207299	0.246697	Flywch1
ENSMUSG00000028785	7238.09	-0.694812	0.300565	-2.31168	0.0207951	0.247305	Hpca
ENSMUSG00000060890	23.9633	-1.04953	0.454274	-2.31035	0.0208685	0.248005	Arr3
ENSMUSG00000020387	1620.32	0.263537	0.11408	2.3101	0.0208824	0.248005	Jade2
ENSMUSG00000018196	1211.81	-0.238482	0.103256	-2.30962	0.0209093	0.248156	Glrx2
ENSMUSG00000041440	89.4593	-0.464953	0.20136	-2.30907	0.0209398	0.248349	Gk5
ENSMUSG00000026932	3406.3	0.513234	0.222311	2.30863	0.020964	0.248467	Nacc2
ENSMUSG00000059246	31.5256	2.16497	0.938197	2.30758	0.0210225	0.248486	Foxb1
ENSMUSG00000020078	1030.37	-0.461329	0.199917	-2.3076	0.0210212	0.248486	Vps26a
ENSMUSG00000022205	2727.63	-0.324867	0.140781	-2.3076	0.0210213	0.248486	Sub1
ENSMUSG00000020580	5648.87	-0.553147	0.239653	-2.30811	0.020993	0.248486	Rock2
ENSMUSG00000063239	1108.75	0.548174	0.237665	2.3065	0.0210827	0.248862	Grm4
ENSMUSG00000038418	4403.23	-0.76491	0.331632	-2.3065	0.0210828	0.248862	Egr1
ENSMUSG00000097223	13.2617	-1.18332	0.513441	-2.30469	0.0211841	0.24964	Gm2449
ENSMUSG00000024339	96.6565	0.495704	0.215052	2.30505	0.021164	0.24964	Tap2
ENSMUSG00000001518	463.273	0.392866	0.170474	2.30455	0.0211916	0.24964	Itfg2
ENSMUSG00000021125	52.5705	-0.700586	0.304071	-2.30402	0.0212214	0.249655	Arg2
ENSMUSG00000022324	447.554	-0.651307	0.282657	-2.30423	0.0212098	0.249655	Matn2
ENSMUSG00000052631	18.388	1.09618	0.476064	2.30259	0.0213017	0.250347	Sh2d6
ENSMUSG00000078952	35.1269	1.6506	0.717519	2.30042	0.0214243	0.250347	Lncenc1
ENSMUSG00000028072	49.1831	1.30297	0.566669	2.29934	0.0214854	0.250347	Ntrk1
ENSMUSG00000048617	63.7141	0.836506	0.363866	2.29894	0.0215083	0.250347	Rtbdn
ENSMUSG00000078202	104.432	0.670086	0.291478	2.29892	0.0215095	0.250347	Nrarp
ENSMUSG00000034401	107.417	0.502146	0.218179	2.30154	0.0213614	0.250347	Spata6
ENSMUSG00000047735	113.817	-0.718432	0.312207	-2.30114	0.0213839	0.250347	Samd9l
ENSMUSG00000037001	120.862	-0.467613	0.20318	-2.30147	0.021365	0.250347	Zfp39
ENSMUSG00000069184	128.367	-0.603009	0.262286	-2.29905	0.0215022	0.250347	Zfp72
ENSMUSG00000029196	657.042	0.29581	0.128595	2.30032	0.0214301	0.250347	Tada2b
ENSMUSG00000058420	835.177	-0.642794	0.279405	-2.30058	0.0214155	0.250347	Syt17
ENSMUSG00000005882	870.334	0.381552	0.165841	2.30071	0.0214082	0.250347	Uqcc1
ENSMUSG00000026626	1411.05	-0.316828	0.137813	-2.29897	0.0215065	0.250347	Ppp2r5a
ENSMUSG00000037999	2018.34	-0.427672	0.185858	-2.30108	0.0213873	0.250347	Arap2
ENSMUSG00000022602	2265.75	-1.22239	0.531555	-2.29965	0.0214679	0.250347	Arc
ENSMUSG00000052889	9784.76	-0.711646	0.309438	-2.2998	0.0214597	0.250347	Prkcb
ENSMUSG00000107815	60.5459	-0.699232	0.30432	-2.29769	0.0215797	0.25083	Gm44257
ENSMUSG00000046897	1492.12	0.341869	0.148774	2.2979	0.0215674	0.25083	Zfp740
ENSMUSG00000027323	22.866	0.986609	0.429652	2.2963	0.0216588	0.250978	Rad51
ENSMUSG00000028519	1874.01	-0.559479	0.243549	-2.29719	0.0216081	0.250978	Dab1
ENSMUSG00000060924	2039.72	-0.534286	0.232733	-2.2957	0.021693	0.250978	Csmd1
ENSMUSG00000047976	2722.53	0.276163	0.120273	2.29614	0.0216678	0.250978	Kcna1
ENSMUSG00000008763	3113.74	-0.413808	0.180239	-2.29589	0.0216822	0.250978	Man1a2
ENSMUSG00000022296	3184.76	-0.493285	0.214861	-2.29583	0.0216855	0.250978	Baalc
ENSMUSG00000058589	5928.57	-0.383944	0.167201	-2.2963	0.0216589	0.250978	Anks1b
ENSMUSG00000039115	232.345	-0.502076	0.218742	-2.29529	0.0217167	0.251086	Itga9
ENSMUSG00000037492	1233.42	0.394884	0.172135	2.29404	0.0217882	0.251746	Zmat4
ENSMUSG00000086043	61.5586	1.04321	0.454883	2.29337	0.0218268	0.252025	Gm12473
ENSMUSG00000049112	195.124	-0.818978	0.357194	-2.29281	0.0218589	0.252063	Oxtr
ENSMUSG00000056069	278.199	-0.644188	0.280944	-2.29294	0.0218514	0.252063	Otulinl
ENSMUSG00000053985	215.874	0.385804	0.168285	2.29256	0.0218735	0.252065	Zfp14
ENSMUSG00000085961	15.2419	-1.17989	0.515004	-2.29103	0.0219616	0.25258	Gm15904
ENSMUSG00000035509	139.528	0.708053	0.309004	2.29141	0.02194	0.25258	Fbxl21
ENSMUSG00000021738	839.092	-0.291319	0.127147	-2.2912	0.0219516	0.25258	Atxn7
ENSMUSG00000070643	245.257	0.513013	0.223998	2.29026	0.0220063	0.252595	Sox13
ENSMUSG00000029007	244.78	0.459864	0.20078	2.29039	0.0219986	0.252595	Agtrap
ENSMUSG00000106847	7101.46	0.261187	0.114025	2.2906	0.0219865	0.252595	Peg13
ENSMUSG00000031983	1796.36	0.618405	0.270077	2.28973	0.0220368	0.252779	2310022B05Rik
ENSMUSG00000029875	524.601	0.636013	0.277803	2.28944	0.0220539	0.252809	Ccdc184
ENSMUSG00000107412	13.0992	1.05539	0.461385	2.28744	0.0221699	0.252819	Gm20383
ENSMUSG00000026822	41.5392	1.54499	0.675341	2.28773	0.0221535	0.252819	Lcn2
ENSMUSG00000019359	145.935	0.722935	0.315965	2.28802	0.0221361	0.252819	Gdpd2
ENSMUSG00000036278	181.506	0.619835	0.27081	2.28882	0.0220901	0.252819	Macrod1
ENSMUSG00000053004	222.535	-0.39656	0.173295	-2.28836	0.0221167	0.252819	Hrh1
ENSMUSG00000074738	543.287	0.523701	0.228932	2.28758	0.0221621	0.252819	Fndc10
ENSMUSG00000022337	794.566	-0.334322	0.146156	-2.28743	0.0221705	0.252819	Emc2
ENSMUSG00000002957	4546.73	-0.261687	0.114369	-2.28809	0.0221325	0.252819	Ap2a2
ENSMUSG00000078877	225.797	-0.515415	0.225402	-2.28665	0.0222164	0.253177	Gm14295
ENSMUSG00000025816	1048.16	-0.327537	0.143274	-2.28608	0.0222495	0.253389	Sec61a2
ENSMUSG00000040374	360.3	0.522059	0.228418	2.28554	0.022281	0.253583	Pex2
ENSMUSG00000029014	571.85	-0.39305	0.172083	-2.28407	0.0223674	0.253802	Dnajc2
ENSMUSG00000058441	2421.16	0.381883	0.167171	2.28438	0.022349	0.253802	Panx2
ENSMUSG00000021027	3686.78	-0.361127	0.158113	-2.28398	0.0223729	0.253802	Ralgapa1
ENSMUSG00000062257	3885.83	-0.471365	0.206337	-2.28444	0.0223458	0.253802	Opcml
ENSMUSG00000020340	18207.4	-0.44847	0.196271	-2.28495	0.0223157	0.253802	Cyfip2
ENSMUSG00000003484	14.2427	1.23856	0.54269	2.28227	0.0224736	0.254284	Cyp4f18
ENSMUSG00000020123	21.5254	1.53385	0.672065	2.2823	0.0224719	0.254284	Avpr1a
ENSMUSG00000019256	195.597	-0.505529	0.2215	-2.2823	0.0224715	0.254284	Ahr
ENSMUSG00000109324	965.646	0.316698	0.138759	2.28236	0.0224681	0.254284	Prmt1
ENSMUSG00000114446	12.9899	-1.6049	0.703374	-2.28172	0.022506	0.254485	Gm33524
ENSMUSG00000030866	14.6766	2.20632	0.967496	2.28045	0.022581	0.254852	Ern2
ENSMUSG00000086506	14.7644	1.3806	0.605541	2.27994	0.0226113	0.254852	Gm15911
ENSMUSG00000054715	205.782	-0.505997	0.221899	-2.2803	0.0225899	0.254852	Zscan22
ENSMUSG00000037656	1181.87	0.262162	0.114944	2.28079	0.0225608	0.254852	Slc20a2
ENSMUSG00000028426	3454.43	-0.233572	0.102442	-2.28005	0.0226045	0.254852	Rad23b
ENSMUSG00000062960	343.905	-0.60677	0.266257	-2.27889	0.0226735	0.255223	Kdr
ENSMUSG00000016382	2828.57	-0.435082	0.19091	-2.27899	0.0226679	0.255223	Pls3
ENSMUSG00000034780	1052.48	-0.436095	0.191408	-2.27836	0.0227054	0.255418	B3galt1
ENSMUSG00000038534	455.453	0.449405	0.19737	2.27696	0.0227886	0.256023	Osbpl7
ENSMUSG00000043079	2982.87	-0.906298	0.39801	-2.27707	0.0227819	0.256023	Synpo
ENSMUSG00000109812	86.1077	-0.679361	0.298467	-2.27617	0.0228358	0.256389	Gm45640
ENSMUSG00000035847	10616.1	-0.393077	0.172776	-2.27507	0.0229017	0.256963	Ids
ENSMUSG00000085828	38.2222	0.889022	0.391133	2.27294	0.0230298	0.257245	Gm15612
ENSMUSG00000004661	158.469	-0.57987	0.255116	-2.27296	0.0230285	0.257245	Arid3b
ENSMUSG00000020334	176.419	0.815256	0.358573	2.27361	0.0229894	0.257245	Slc22a4
ENSMUSG00000030499	231.138	0.541357	0.238139	2.27328	0.0230094	0.257245	Kctd15
ENSMUSG00000072653	272.664	0.436415	0.191907	2.2741	0.02296	0.257245	Zfp783
ENSMUSG00000029570	495.864	0.594826	0.261623	2.2736	0.0229899	0.257245	Lfng
ENSMUSG00000079481	1879.69	-0.350497	0.154143	-2.27384	0.0229756	0.257245	Nhsl2
ENSMUSG00000079499	299.133	-0.429462	0.188996	-2.27233	0.0230666	0.257491	6530402F18Rik
ENSMUSG00000026313	1390.63	-0.269964	0.118877	-2.27094	0.0231504	0.257942	Hdac4
ENSMUSG00000032368	1582.92	1.38143	0.608256	2.27114	0.0231388	0.257942	Zic1
ENSMUSG00000040760	2444.3	-0.359698	0.158392	-2.27093	0.0231513	0.257942	Appl1
ENSMUSG00000032224	2686.79	-0.847339	0.373216	-2.27037	0.0231849	0.258152	Fam81a
ENSMUSG00000037946	264.179	0.429606	0.189297	2.26949	0.0232388	0.258587	Fgd3
ENSMUSG00000090576	13.4097	1.34623	0.593736	2.26739	0.0233664	0.258873	Gm17055
ENSMUSG00000102018	35.5689	0.872827	0.384889	2.26774	0.0233452	0.258873	K230010J24Rik
ENSMUSG00000053113	46.5944	-0.93719	0.413112	-2.26861	0.0232921	0.258873	Socs3
ENSMUSG00000029725	148.265	0.796046	0.350949	2.26827	0.0233129	0.258873	Ppp1r35
ENSMUSG00000015697	947.094	-0.311947	0.137582	-2.26736	0.0233682	0.258873	Setdb1
ENSMUSG00000041781	1065.43	-0.320335	0.141279	-2.2674	0.0233659	0.258873	Cpsf2
ENSMUSG00000056515	1722.55	0.324906	0.143286	2.26755	0.0233569	0.258873	Rab31
ENSMUSG00000046794	35.3674	-0.864201	0.381197	-2.26707	0.0233859	0.258905	Ppp1r3b
ENSMUSG00000034853	1013.55	0.325543	0.143624	2.26663	0.0234129	0.259039	Acot11
ENSMUSG00000025193	73.1831	0.596277	0.263261	2.26497	0.0235147	0.259673	Cutc
ENSMUSG00000030276	406.958	0.414672	0.183068	2.26512	0.023505	0.259673	Ttll3
ENSMUSG00000020483	11714.5	0.35081	0.154859	2.26535	0.0234915	0.259673	Dynll2
ENSMUSG00000103378	96.9079	-1.28244	0.566414	-2.26413	0.0235661	0.260076	Gm37176
ENSMUSG00000028456	1381.01	-0.552246	0.243959	-2.26368	0.0235937	0.260216	Unc13b
ENSMUSG00000026395	99.0879	-0.716547	0.316611	-2.26318	0.0236246	0.260314	Ptprc
ENSMUSG00000053137	692.24	-0.414622	0.183231	-2.26284	0.0236458	0.260314	Mapk11
ENSMUSG00000028086	3183.87	-0.569788	0.251805	-2.26281	0.0236473	0.260314	Fbxw7
ENSMUSG00000020205	183.495	-0.353981	0.156472	-2.26226	0.0236815	0.260513	Phlda1
ENSMUSG00000031604	1464.49	-0.379426	0.167736	-2.26204	0.0236952	0.260513	Msmo1
ENSMUSG00000097267	111.936	-0.670432	0.29645	-2.26153	0.0237262	0.260689	1700109K24Rik
ENSMUSG00000103492	15.2401	-1.13124	0.500717	-2.25923	0.0238688	0.261074	Gm37412
ENSMUSG00000097493	32.9417	-0.938314	0.415448	-2.25856	0.0239106	0.261074	9930014A18Rik
ENSMUSG00000031465	64.1072	0.572414	0.253368	2.25922	0.0238697	0.261074	Angpt2
ENSMUSG00000106651	90.5466	-0.936527	0.414344	-2.26026	0.023805	0.261074	Gm42608
ENSMUSG00000040495	352.217	-0.763514	0.33804	-2.25865	0.023905	0.261074	Chrm4
ENSMUSG00000045409	807.109	0.238795	0.105704	2.25909	0.0238776	0.261074	Trim39
ENSMUSG00000056427	927.1	-0.605662	0.268007	-2.25988	0.0238289	0.261074	Slit3
ENSMUSG00000040010	1815.81	0.39379	0.17419	2.26069	0.0237786	0.261074	Slc7a5
ENSMUSG00000036712	3253.67	-0.399082	0.176687	-2.25869	0.0239025	0.261074	Cyld
ENSMUSG00000005360	9796.46	-0.341552	0.151224	-2.25858	0.0239095	0.261074	Slc1a3
ENSMUSG00000040483	97.8253	0.502057	0.222365	2.2578	0.0239578	0.261263	Xaf1
ENSMUSG00000003380	1721	0.686323	0.303967	2.25788	0.0239529	0.261263	Rabac1
ENSMUSG00000058258	375.319	-0.483616	0.214229	-2.25747	0.0239787	0.261328	Idi1
ENSMUSG00000033147	255.79	0.434745	0.192631	2.25688	0.0240156	0.261566	Slc22a15
ENSMUSG00000055660	154.815	-0.615047	0.272582	-2.25638	0.024047	0.261583	Mettl4
ENSMUSG00000044562	159.646	0.61201	0.271212	2.25657	0.0240347	0.261583	Rasip1
ENSMUSG00000111118	23.4791	0.842472	0.373505	2.25559	0.0240966	0.261959	Gm6545
ENSMUSG00000054385	15.6177	1.26111	0.559332	2.25467	0.0241538	0.261999	Ceacam2
ENSMUSG00000020990	270.306	0.456768	0.202616	2.25435	0.0241743	0.261999	Cdkl1
ENSMUSG00000021241	390.579	0.37901	0.16809	2.2548	0.0241457	0.261999	Isca2
ENSMUSG00000071655	920.302	0.44736	0.198466	2.25409	0.0241903	0.261999	Ubxn1
ENSMUSG00000022377	2580.39	-0.411633	0.182581	-2.25452	0.0241633	0.261999	Asap1
ENSMUSG00000029777	2638.75	0.269463	0.119538	2.25422	0.0241826	0.261999	Gars
ENSMUSG00000018378	804.075	0.541582	0.240301	2.25376	0.024211	0.262061	Cuedc1
ENSMUSG00000000247	747.219	-0.716278	0.317915	-2.25305	0.0242562	0.262388	Lhx2
ENSMUSG00000023367	225.28	0.491547	0.218245	2.25227	0.0243049	0.262446	Tmem176a
ENSMUSG00000020950	1264.55	-0.826051	0.36675	-2.25235	0.0243	0.262446	Foxg1
ENSMUSG00000017485	2585.59	-0.348457	0.154715	-2.25225	0.0243067	0.262446	Top2b
ENSMUSG00000085389	104.37	0.481725	0.213909	2.25201	0.0243218	0.262447	1700003M07Rik
ENSMUSG00000033767	412.564	-0.37863	0.168193	-2.25116	0.0243752	0.262861	Tmem131l
ENSMUSG00000037653	214.826	0.473206	0.210275	2.25041	0.0244228	0.263212	Kctd8
ENSMUSG00000039989	889.157	0.312605	0.138979	2.24931	0.0244929	0.263642	Cbx4
ENSMUSG00000021686	1026.67	-0.322584	0.143411	-2.24937	0.0244892	0.263642	Ap3b1
ENSMUSG00000089957	35.4517	-0.813648	0.36193	-2.24808	0.024571	0.263833	A830011K09Rik
ENSMUSG00000020696	318.408	0.443937	0.197472	2.2481	0.0245697	0.263833	Rffl
ENSMUSG00000003929	630.802	-0.497171	0.221116	-2.24846	0.0245468	0.263833	Zfp81
ENSMUSG00000025582	5539.92	-0.677315	0.301275	-2.24816	0.0245658	0.263833	Nptx1
ENSMUSG00000006931	262.733	0.573113	0.255052	2.24704	0.0246373	0.264219	P3h4
ENSMUSG00000023036	436.175	0.582242	0.259112	2.24707	0.0246356	0.264219	Pcdhgc4
ENSMUSG00000027955	104.762	-0.906627	0.403525	-2.24677	0.024655	0.264247	Fam198b
ENSMUSG00000025175	548.345	0.257983	0.114875	2.24578	0.0247183	0.264764	Fn3k
ENSMUSG00000019889	1411.41	-0.55915	0.24913	-2.24441	0.0248058	0.265538	Ptprk
ENSMUSG00000030605	1840.88	-0.439874	0.196033	-2.24388	0.02484	0.265741	Mfge8
ENSMUSG00000045498	129.456	-0.409429	0.182581	-2.24245	0.0249325	0.265865	Pcdhb3
ENSMUSG00000002324	142.454	0.854744	0.38112	2.24271	0.0249153	0.265865	Rec8
ENSMUSG00000086841	145.297	0.644639	0.287413	2.2429	0.0249032	0.265865	2410006H16Rik
ENSMUSG00000053119	1533.56	-0.244395	0.108994	-2.24229	0.0249429	0.265865	Chmp3
ENSMUSG00000042272	1678.13	-0.402385	0.179399	-2.24296	0.0248997	0.265865	Sestd1
ENSMUSG00000001366	1758.15	0.303107	0.135159	2.24259	0.0249231	0.265865	Fbxo9
ENSMUSG00000109887	40.6686	0.783037	0.349368	2.24129	0.0250071	0.266022	Gm28756
ENSMUSG00000028961	615.464	0.360334	0.160818	2.24064	0.0250496	0.266022	Pgd
ENSMUSG00000031536	831.536	-0.273432	0.122038	-2.24055	0.0250552	0.266022	Polb
ENSMUSG00000038991	968.916	0.310741	0.138616	2.24174	0.0249784	0.266022	Txndc5
ENSMUSG00000063801	1358.03	0.262006	0.116946	2.24041	0.0250642	0.266022	Ap3s2
ENSMUSG00000004056	1472.42	-0.504787	0.225271	-2.24079	0.0250394	0.266022	Akt2
ENSMUSG00000020390	2492.48	-0.262397	0.11706	-2.24156	0.0249899	0.266022	Ube2b
ENSMUSG00000027305	393.139	-0.375204	0.167562	-2.2392	0.0251428	0.266694	Ndufaf1
ENSMUSG00000033585	3334.56	0.645143	0.288165	2.2388	0.025169	0.26681	Ndn
ENSMUSG00000032303	89.0395	0.955772	0.427043	2.23811	0.0252137	0.266851	Chrna3
ENSMUSG00000032733	306.448	0.495809	0.221596	2.23745	0.0252569	0.266851	Snx33
ENSMUSG00000019055	544.884	0.447984	0.20019	2.23779	0.0252347	0.266851	Plod1
ENSMUSG00000026834	544.263	-0.737892	0.329792	-2.23744	0.0252573	0.266851	Acvr1c
ENSMUSG00000030020	4617.13	-0.543033	0.242714	-2.23733	0.0252646	0.266851	Prickle2
ENSMUSG00000033981	13335.5	-0.489369	0.218676	-2.23787	0.0252295	0.266851	Gria2
ENSMUSG00000086228	357.374	0.947691	0.423752	2.23643	0.0253235	0.267313	Ubap1l
ENSMUSG00000021624	27.8572	-1.24406	0.556492	-2.23553	0.0253823	0.267448	Cd180
ENSMUSG00000105736	31.4955	-1.12827	0.504653	-2.23574	0.0253691	0.267448	Gm42456
ENSMUSG00000021936	2382.97	-0.413569	0.184973	-2.23584	0.0253622	0.267448	Mapk8
ENSMUSG00000048264	2135.76	-0.293263	0.131211	-2.23505	0.0254141	0.267461	Dip2c
ENSMUSG00000001175	43224.6	-0.382899	0.171306	-2.23517	0.0254061	0.267461	Calm1
ENSMUSG00000086844	31.7126	1.26899	0.567968	2.23427	0.0254652	0.267676	B230206H07Rik
ENSMUSG00000057455	1848.53	0.548546	0.245514	2.23427	0.0254651	0.267676	Rit2
ENSMUSG00000036777	921.814	0.521673	0.233537	2.23379	0.0254967	0.267846	Anln
ENSMUSG00000003721	838.852	0.241923	0.108315	2.23351	0.0255154	0.267881	Insig2
ENSMUSG00000090671	26.366	1.521	0.681382	2.23223	0.0255997	0.268122	Gm5067
ENSMUSG00000024827	385.616	-0.583703	0.261449	-2.23257	0.025577	0.268122	Gldc
ENSMUSG00000033909	1102.41	0.29249	0.130995	2.23284	0.0255594	0.268122	Usp36
ENSMUSG00000025421	1458.3	0.247619	0.110919	2.23243	0.0255865	0.268122	Hdhd2
ENSMUSG00000066058	18.8988	1.65853	0.743378	2.23108	0.025676	0.268295	Cldn19
ENSMUSG00000116081	232.387	-0.951281	0.426559	-2.23013	0.0257391	0.268295	AC165278.1
ENSMUSG00000020374	325.396	-0.748692	0.335663	-2.23048	0.0257153	0.268295	Rasgef1c
ENSMUSG00000068284	1728.91	-0.534847	0.239825	-2.23016	0.025737	0.268295	Usf3
ENSMUSG00000033152	1927.63	0.788012	0.353306	2.23039	0.0257215	0.268295	Podxl2
ENSMUSG00000032740	2118.85	-0.450149	0.201767	-2.23104	0.0256786	0.268295	Ccdc88a
ENSMUSG00000055296	2757	-0.392711	0.176038	-2.23083	0.0256926	0.268295	Tmem245
ENSMUSG00000041020	3867.98	0.294693	0.132116	2.23056	0.0257103	0.268295	Map7d2
ENSMUSG00000047534	29.1466	-0.721661	0.323866	-2.22827	0.0258623	0.268401	Mis18bp1
ENSMUSG00000031737	49.8546	1.46496	0.657498	2.22809	0.0258745	0.268401	Irx5
ENSMUSG00000028555	143.479	0.817777	0.366893	2.22893	0.0258188	0.268401	Ttc39a
ENSMUSG00000057093	258.685	-0.363299	0.163028	-2.22844	0.025851	0.268401	Zfp607b
ENSMUSG00000009406	1029.86	-0.347991	0.156188	-2.22803	0.0258788	0.268401	Elk1
ENSMUSG00000049939	1514.4	-0.552281	0.247721	-2.22945	0.025784	0.268401	Lrrc4
ENSMUSG00000049866	1545.22	0.432687	0.194138	2.22876	0.0258299	0.268401	Arl4c
ENSMUSG00000063455	1642.92	-0.342721	0.153788	-2.22853	0.025845	0.268401	D630045J12Rik
ENSMUSG00000022708	3407.23	-0.34277	0.153854	-2.22789	0.0258876	0.268401	Zbtb20
ENSMUSG00000036972	199.355	0.961857	0.431817	2.22746	0.0259164	0.268541	Zic4
ENSMUSG00000070337	88.9543	1.23992	0.55686	2.22664	0.0259716	0.268793	Gpr179
ENSMUSG00000072872	649.237	-0.447604	0.201007	-2.22681	0.0259599	0.268793	Rybp
ENSMUSG00000047420	37.3512	-0.758101	0.340585	-2.22588	0.0260221	0.268936	Fam180a
ENSMUSG00000085611	63.8782	-0.805906	0.362142	-2.22538	0.0260555	0.268936	Ap3s1-ps1
ENSMUSG00000032040	132.874	0.517814	0.232696	2.22528	0.0260623	0.268936	Dcps
ENSMUSG00000021693	1908.98	-0.438712	0.197101	-2.22583	0.0260258	0.268936	Kif2a
ENSMUSG00000063317	2959.61	-0.281059	0.126279	-2.2257	0.0260346	0.268936	Usp31
ENSMUSG00000100158	32.3216	0.893457	0.401596	2.22476	0.0260972	0.269042	Gm28119
ENSMUSG00000096780	1425.59	-0.502518	0.225902	-2.2245	0.0261151	0.269042	Tmem181b-ps
ENSMUSG00000038301	1986.25	-0.307458	0.138218	-2.22444	0.0261188	0.269042	Snx10
ENSMUSG00000019842	206.085	0.391721	0.176136	2.22397	0.0261507	0.269053	Traf3ip2
ENSMUSG00000066979	1147.48	0.222411	0.100002	2.22407	0.0261437	0.269053	Bub3
ENSMUSG00000024457	483.546	0.387906	0.174464	2.22342	0.0261877	0.269178	Trim26
ENSMUSG00000041992	2758.54	-0.512916	0.230698	-2.22333	0.0261936	0.269178	Rapgef5
ENSMUSG00000071855	167.792	-0.454477	0.204499	-2.22239	0.0262567	0.269668	Ccdc112
ENSMUSG00000037541	4309.41	-0.505574	0.227553	-2.22179	0.0262978	0.269772	Shank2
ENSMUSG00000030701	6718.44	0.399149	0.179646	2.22187	0.0262923	0.269772	Plekhb1
ENSMUSG00000114148	30.3507	-0.840103	0.378304	-2.22071	0.0263706	0.270136	Gm47701
ENSMUSG00000024754	417.06	-0.277012	0.124818	-2.21932	0.0264647	0.270136	Tmem2
ENSMUSG00000045613	635.57	0.496018	0.223511	2.21921	0.0264724	0.270136	Chrm2
ENSMUSG00000020246	707.157	-0.40668	0.183247	-2.21929	0.0264667	0.270136	Hcfc2
ENSMUSG00000034793	725.52	0.482014	0.217135	2.21989	0.0264265	0.270136	G6pc3
ENSMUSG00000038733	2947.93	-0.338356	0.152387	-2.22038	0.0263931	0.270136	Wdr26
ENSMUSG00000028656	3943.55	-0.357075	0.16083	-2.22021	0.0264047	0.270136	Cap1
ENSMUSG00000024639	4494.57	-0.319748	0.144071	-2.21937	0.0264616	0.270136	Gnaq
ENSMUSG00000064329	4941.74	0.372059	0.167539	2.22072	0.0263697	0.270136	Scn1a
ENSMUSG00000043257	184.099	0.52635	0.237246	2.21859	0.0265148	0.270212	Pigv
ENSMUSG00000040537	5965.66	-0.346478	0.156182	-2.21842	0.0265262	0.270212	Adam22
ENSMUSG00000029223	7274.25	0.324418	0.146219	2.21871	0.0265061	0.270212	Uchl1
ENSMUSG00000089889	23.3416	1.02844	0.464021	2.21637	0.0266661	0.271382	0610040B10Rik
ENSMUSG00000002227	241.093	-0.452656	0.204241	-2.21628	0.0266722	0.271382	Mov10
ENSMUSG00000024963	229.302	0.327606	0.147859	2.21566	0.0267148	0.271657	Dnajc4
ENSMUSG00000030249	310.064	0.381526	0.17228	2.21457	0.0267894	0.272258	Abcc9
ENSMUSG00000043969	118.646	-0.783743	0.353958	-2.21423	0.0268132	0.272341	Emx2
ENSMUSG00000044499	160.069	0.595353	0.268936	2.21373	0.0268472	0.272528	Hs3st5
ENSMUSG00000084849	42.5837	-0.862293	0.389683	-2.21281	0.026911	0.272775	Gm16105
ENSMUSG00000032615	524.43	0.449927	0.203377	2.21229	0.0269468	0.272775	Nt5m
ENSMUSG00000037286	916.738	-0.314295	0.142052	-2.21254	0.0269297	0.272775	Stag1
ENSMUSG00000037826	1385.91	-0.316383	0.142963	-2.21304	0.0268948	0.272775	Ppm1k
ENSMUSG00000048385	3988.93	0.642854	0.290589	2.21225	0.0269496	0.272775	Scrt1
ENSMUSG00000071265	359.319	-0.581084	0.262725	-2.21176	0.0269831	0.272956	1700086L19Rik
ENSMUSG00000026628	17.4025	1.2805	0.579906	2.20811	0.0272365	0.273016	Atf3
ENSMUSG00000079364	17.7726	1.56787	0.70973	2.20911	0.0271672	0.273016	Gm3558
ENSMUSG00000022464	18.5243	-1.04422	0.472966	-2.20781	0.0272578	0.273016	Slc38a4
ENSMUSG00000097184	25.6761	1.20063	0.54388	2.20752	0.0272778	0.273016	4632428C04Rik
ENSMUSG00000116809	30.0499	-0.978415	0.442927	-2.20898	0.0271763	0.273016	AC122538.1
ENSMUSG00000030752	107.078	0.483672	0.219074	2.20781	0.0272578	0.273016	Kdm8
ENSMUSG00000112117	110.778	1.11109	0.502461	2.2113	0.0270148	0.273016	Rmst
ENSMUSG00000035439	132.812	0.772351	0.349553	2.20954	0.0271373	0.273016	Haus8
ENSMUSG00000047371	171.659	0.6248	0.282835	2.20906	0.0271706	0.273016	Zfp768
ENSMUSG00000022360	210.165	-0.602225	0.272623	-2.209	0.0271747	0.273016	Atad2
ENSMUSG00000054893	327.069	-0.462569	0.209542	-2.20752	0.0272777	0.273016	Zfp667
ENSMUSG00000113852	343.377	-0.505417	0.228965	-2.2074	0.027286	0.273016	Gm48062
ENSMUSG00000070319	815.256	0.310382	0.140551	2.20832	0.0272223	0.273016	Eif3g
ENSMUSG00000032648	1137.96	0.506481	0.229345	2.20838	0.0272178	0.273016	Pygm
ENSMUSG00000024095	1302.41	-0.339968	0.153982	-2.20785	0.0272548	0.273016	Hnrnpll
ENSMUSG00000041258	1311.9	-0.30272	0.137061	-2.20864	0.0271996	0.273016	Zfp236
ENSMUSG00000015806	2050.1	0.592185	0.26813	2.20857	0.0272042	0.273016	Qdpr
ENSMUSG00000022791	4939	0.451257	0.204376	2.20797	0.0272464	0.273016	Tnk2
ENSMUSG00000030310	10568.9	0.26523	0.11996	2.21098	0.0270369	0.273016	Slc6a1
ENSMUSG00000020651	71.0076	-1.18928	0.539048	-2.20625	0.0273662	0.27346	Slc26a4
ENSMUSG00000050022	246.271	-0.350589	0.158977	-2.20528	0.0274345	0.27346	Amz1
ENSMUSG00000022898	501.542	0.452917	0.205386	2.2052	0.0274399	0.27346	Dscr3
ENSMUSG00000028821	597.693	0.264412	0.119889	2.20547	0.0274209	0.27346	Syf2
ENSMUSG00000027374	884.688	0.363544	0.164847	2.20535	0.0274299	0.27346	Mrps5
ENSMUSG00000022361	1602.92	-0.401131	0.181818	-2.20622	0.0273688	0.27346	Zhx1
ENSMUSG00000072769	2241.3	-0.545834	0.247441	-2.20592	0.0273897	0.27346	Gm10419
ENSMUSG00000002997	1316.88	-0.415177	0.188313	-2.20472	0.0274741	0.273644	Prkar2b
ENSMUSG00000025579	8956.6	0.446583	0.202588	2.20439	0.027497	0.273716	Gaa
ENSMUSG00000022439	87.1978	-0.517816	0.235033	-2.20316	0.0275836	0.274345	Parvg
ENSMUSG00000034333	124.495	-0.462162	0.209811	-2.20275	0.0276123	0.274345	Zbed4
ENSMUSG00000060771	404.563	-0.508039	0.230738	-2.2018	0.0276792	0.274345	Tsga10
ENSMUSG00000034997	730.496	-0.758859	0.344516	-2.20268	0.0276172	0.274345	Htr2a
ENSMUSG00000043061	788.705	0.248183	0.112704	2.20207	0.02766	0.274345	Tmem18
ENSMUSG00000033900	2772.66	-0.438651	0.199232	-2.20171	0.0276858	0.274345	Map9
ENSMUSG00000003847	3125.38	-0.411151	0.186685	-2.20238	0.0276383	0.274345	Nfat5
ENSMUSG00000064363	72406.1	-0.417936	0.189788	-2.20212	0.0276572	0.274345	mt-Nd4
ENSMUSG00000048040	422.003	0.517598	0.235123	2.2014	0.0277079	0.274409	Arxes2
ENSMUSG00000037062	1942.69	-0.366964	0.166713	-2.20117	0.0277239	0.274412	Sh3glb1
ENSMUSG00000041429	56.0142	0.688022	0.312774	2.19974	0.0278255	0.274824	Nthl1
ENSMUSG00000082575	80.4839	0.603531	0.274563	2.19815	0.0279386	0.274824	Gm13050
ENSMUSG00000091509	153.364	-0.564512	0.256663	-2.19943	0.0278475	0.274824	Gm17066
ENSMUSG00000057060	533.794	-0.288019	0.130993	-2.19874	0.0278966	0.274824	Slc35f3
ENSMUSG00000027676	559.483	-0.39499	0.179526	-2.20019	0.0277936	0.274824	Ccdc39
ENSMUSG00000038665	940.595	-0.424622	0.193143	-2.19849	0.0279145	0.274824	Dgki
ENSMUSG00000019960	1025.45	-0.623348	0.283423	-2.19936	0.0278526	0.274824	Dusp6
ENSMUSG00000049658	1132.03	-0.434591	0.197549	-2.19991	0.0278133	0.274824	Bdp1
ENSMUSG00000039661	1361.85	0.398439	0.181208	2.19879	0.0278928	0.274824	Dusp26
ENSMUSG00000024969	2218.91	-0.284323	0.129324	-2.19853	0.0279112	0.274824	Mark2
ENSMUSG00000041986	4177.77	-0.478863	0.217835	-2.19829	0.0279287	0.274824	Elmod1
ENSMUSG00000039375	649.308	-0.647022	0.294399	-2.19777	0.0279653	0.274932	Wdr17
ENSMUSG00000022622	44.9316	0.72949	0.332012	2.19718	0.0280079	0.275041	Acr
ENSMUSG00000028756	5434.29	0.468014	0.212993	2.19733	0.027997	0.275041	Pink1
ENSMUSG00000032936	6925.92	-0.468432	0.213219	-2.19695	0.0280239	0.275043	Camkv
ENSMUSG00000064090	20.1306	-1.18274	0.540006	-2.19024	0.0285071	0.275073	Vrk2
ENSMUSG00000055978	21.2262	0.933649	0.425891	2.19222	0.0283634	0.275073	Fut2
ENSMUSG00000101462	26.8548	-1.07803	0.492198	-2.19022	0.0285079	0.275073	Gm3052
ENSMUSG00000037375	28.7249	0.890642	0.40583	2.19462	0.0281911	0.275073	Hhat
ENSMUSG00000073077	39.6426	0.728546	0.332531	2.19091	0.0284582	0.275073	Gm7173
ENSMUSG00000001517	45.362	0.576686	0.263126	2.19167	0.0284035	0.275073	Foxm1
ENSMUSG00000028480	67.6002	0.754654	0.343988	2.19384	0.028247	0.275073	Glipr2
ENSMUSG00000044328	115.355	0.74157	0.338112	2.19327	0.0282881	0.275073	Trp53i13
ENSMUSG00000029381	137.718	0.689677	0.314383	2.19375	0.0282532	0.275073	Shroom3
ENSMUSG00000023886	147.916	-0.986851	0.450324	-2.19142	0.0284211	0.275073	Smoc2
ENSMUSG00000045532	184.51	0.889161	0.405114	2.19484	0.028175	0.275073	C1ql1
ENSMUSG00000028312	190.355	-0.382002	0.1741	-2.19416	0.0282242	0.275073	Smc2
ENSMUSG00000027301	233.439	3.98205	1.8153	2.1936	0.028264	0.275073	Oxt
ENSMUSG00000021318	245.618	-0.474194	0.216045	-2.19488	0.028172	0.275073	Gli3
ENSMUSG00000047797	328.12	0.645556	0.29445	2.19241	0.0283498	0.275073	Gjb1
ENSMUSG00000032763	328.21	0.60855	0.277704	2.19136	0.0284257	0.275073	Ilvbl
ENSMUSG00000022899	362.962	-0.710304	0.323622	-2.19486	0.0281735	0.275073	Slc15a2
ENSMUSG00000029335	364.962	-1.39291	0.635064	-2.19334	0.0282828	0.275073	Bmp3
ENSMUSG00000015363	377.799	0.525558	0.239336	2.1959	0.0280992	0.275073	Trabd
ENSMUSG00000046321	492.71	-0.912937	0.415643	-2.19645	0.02806	0.275073	Hs3st2
ENSMUSG00000029312	582.265	-0.293013	0.133742	-2.19089	0.0284601	0.275073	Klhl8
ENSMUSG00000036775	599.041	-0.348766	0.159139	-2.19157	0.0284102	0.275073	Decr2
ENSMUSG00000039913	810.752	-0.770118	0.350835	-2.1951	0.0281564	0.275073	Pak7
ENSMUSG00000020346	918.086	0.301694	0.137476	2.19452	0.0281979	0.275073	Mgat1
ENSMUSG00000061983	969.639	-0.45341	0.206935	-2.19108	0.0284461	0.275073	Rps12
ENSMUSG00000032411	998.911	-0.371061	0.169009	-2.19551	0.0281274	0.275073	Tfdp2
ENSMUSG00000034714	1045.15	0.450543	0.205479	2.19265	0.028333	0.275073	Ttyh2
ENSMUSG00000066357	3284.59	0.667811	0.304858	2.19056	0.0284836	0.275073	Wdr6
ENSMUSG00000027799	6190.02	-0.36478	0.166336	-2.19304	0.0283047	0.275073	Nbea
ENSMUSG00000020886	12437.3	-0.419095	0.191225	-2.19163	0.028406	0.275073	Dlg4
ENSMUSG00000036438	15858.2	-0.361089	0.164871	-2.19013	0.028515	0.275073	Calm2
ENSMUSG00000023341	28.013	0.735814	0.336168	2.18883	0.0286093	0.27523	Mx2
ENSMUSG00000028689	67.506	0.639485	0.292105	2.18923	0.0285803	0.27523	Ccdc163
ENSMUSG00000048126	157.455	0.681516	0.311336	2.189	0.0285965	0.27523	Col6a3
ENSMUSG00000043252	1023.7	-0.378302	0.172834	-2.18882	0.02861	0.27523	Tmem64
ENSMUSG00000025372	4616.82	-0.682199	0.311652	-2.18898	0.0285986	0.27523	Baiap2
ENSMUSG00000010592	64.8757	-0.917187	0.41922	-2.18784	0.0286812	0.275474	Dazl
ENSMUSG00000033684	544.848	0.403452	0.184387	2.18807	0.0286647	0.275474	Qsox1
ENSMUSG00000022099	5314.03	-0.381702	0.174467	-2.18782	0.0286827	0.275474	Dmtn
ENSMUSG00000091275	21.7272	1.00716	0.460498	2.18711	0.0287342	0.27564	Gm3248
ENSMUSG00000029032	23.3781	1.43064	0.654352	2.18634	0.0287905	0.27564	Arhgef16
ENSMUSG00000000791	62.7463	0.850926	0.389209	2.1863	0.028794	0.27564	Il12rb1
ENSMUSG00000028188	73.2764	-0.829195	0.379295	-2.18615	0.0288046	0.27564	Spata1
ENSMUSG00000034121	129.879	0.573332	0.262149	2.18704	0.0287394	0.27564	Mks1
ENSMUSG00000027800	192.975	0.514862	0.235647	2.18489	0.0288968	0.27564	Tm4sf1
ENSMUSG00000029810	408.405	0.354321	0.162136	2.18533	0.0288646	0.27564	Tmem176b
ENSMUSG00000022865	697.179	-0.334519	0.153052	-2.18565	0.0288411	0.27564	Cxadr
ENSMUSG00000040759	749.053	0.342172	0.156579	2.1853	0.0288672	0.27564	Cmtm5
ENSMUSG00000031660	849.184	-0.332508	0.152208	-2.18456	0.0289209	0.27564	Brd7
ENSMUSG00000037475	1367.42	-0.422916	0.193549	-2.18505	0.0288848	0.27564	Thoc2
ENSMUSG00000024750	3040.44	-0.296759	0.135839	-2.18464	0.0289156	0.27564	Zfand5
ENSMUSG00000021373	3575.84	-0.572237	0.261813	-2.18567	0.0288396	0.27564	Cap2
ENSMUSG00000046442	5693.97	-0.401908	0.183793	-2.18674	0.0287614	0.27564	Ppm1e
ENSMUSG00000038932	16.8878	-1.09657	0.502331	-2.18297	0.0290377	0.27566	Tcfl5
ENSMUSG00000107200	48.9253	-0.956394	0.43832	-2.18195	0.0291129	0.27566	Gm43039
ENSMUSG00000052085	104.619	-0.555247	0.254371	-2.18282	0.0290492	0.27566	Dock8
ENSMUSG00000097406	141.781	0.713118	0.326496	2.18415	0.0289509	0.27566	Gm26833
ENSMUSG00000068615	157.853	0.692069	0.317033	2.18295	0.0290392	0.27566	Gjd2
ENSMUSG00000045071	429.694	0.365619	0.167495	2.18287	0.0290453	0.27566	E130308A19Rik
ENSMUSG00000028328	571.363	-0.538623	0.246943	-2.18116	0.0291716	0.27566	Tmod1
ENSMUSG00000053297	596.203	0.570623	0.261377	2.18314	0.0290254	0.27566	AI854703
ENSMUSG00000024172	837.376	-0.717229	0.328485	-2.18345	0.0290029	0.27566	St6gal2
ENSMUSG00000026761	959.729	-0.342473	0.157005	-2.18129	0.0291619	0.27566	Orc4
ENSMUSG00000022336	1119.49	-0.300489	0.137758	-2.18128	0.0291625	0.27566	Eif3e
ENSMUSG00000070509	1205.24	0.298536	0.136874	2.18111	0.0291754	0.27566	Rgma
ENSMUSG00000041762	1383.53	-0.386131	0.176971	-2.1819	0.0291172	0.27566	Gpr155
ENSMUSG00000035891	1634.91	0.367428	0.168393	2.18196	0.0291124	0.27566	Cerk
ENSMUSG00000069227	1908.85	-0.549618	0.251928	-2.18165	0.0291357	0.27566	Gprin1
ENSMUSG00000002107	8303.23	-0.585198	0.268133	-2.18249	0.0290734	0.27566	Celf2
ENSMUSG00000034751	1996.21	0.307536	0.141014	2.18089	0.0291915	0.275663	Mast4
ENSMUSG00000089704	25.1331	1.51719	0.696008	2.17985	0.0292688	0.27583	Galnt2
ENSMUSG00000025551	828.094	-0.406748	0.186586	-2.17995	0.0292614	0.27583	Fgf14
ENSMUSG00000027584	921.101	0.514866	0.236141	2.18034	0.0292326	0.27583	Oprl1
ENSMUSG00000029465	1271.35	-0.326233	0.149662	-2.1798	0.0292724	0.27583	Arpc3
ENSMUSG00000044505	96.5588	1.27736	0.586109	2.1794	0.0293021	0.275961	Lingo4
ENSMUSG00000062825	9582.74	-0.218381	0.100213	-2.17916	0.0293196	0.275977	Actg1
ENSMUSG00000020836	1250.05	0.503546	0.231107	2.17884	0.0293434	0.276053	Coro6
ENSMUSG00000037712	1580.65	-0.335064	0.153815	-2.17836	0.0293795	0.276243	Fermt2
ENSMUSG00000050587	2196.13	-0.619427	0.284421	-2.17786	0.0294166	0.276444	Lrrc4c
ENSMUSG00000021770	1760.45	-0.315303	0.144813	-2.1773	0.0294579	0.276682	Samd8
ENSMUSG00000031613	106.022	-0.731173	0.335891	-2.17682	0.0294943	0.276699	Hpgd
ENSMUSG00000027287	378.304	-0.373482	0.171582	-2.1767	0.0295029	0.276699	Snap23
ENSMUSG00000034009	397.596	-0.960222	0.441148	-2.17664	0.0295071	0.276699	Rxfp1
ENSMUSG00000020096	50.2031	-0.967602	0.444634	-2.17618	0.029542	0.276877	Tbata
ENSMUSG00000116635	13.7472	1.28007	0.588509	2.1751	0.0296227	0.277187	AC163634.1
ENSMUSG00000107996	31.843	-0.867401	0.398768	-2.1752	0.029615	0.277187	Gm44228
ENSMUSG00000025352	423.276	0.566191	0.26026	2.17549	0.0295937	0.277187	Gdf11
ENSMUSG00000031139	238.679	0.622949	0.286443	2.17477	0.0296473	0.277269	Mcf2
ENSMUSG00000032366	3286.42	-0.37475	0.17244	-2.17322	0.029764	0.278212	Tpm1
ENSMUSG00000033615	10458.6	0.388043	0.178762	2.17072	0.029952	0.279819	Cplx1
ENSMUSG00000053897	94.5197	-0.522929	0.240956	-2.17022	0.0299901	0.280025	Slc39a8
ENSMUSG00000003469	6787.96	-0.566836	0.261255	-2.16967	0.0300321	0.280268	Phyhip
ENSMUSG00000040037	4636.01	-0.474271	0.218627	-2.16931	0.0300592	0.28037	Negr1
ENSMUSG00000026271	13.3047	1.11937	0.516054	2.1691	0.0300753	0.280372	Gpr35
ENSMUSG00000052160	108.648	-0.457598	0.211081	-2.16788	0.030168	0.280935	Pld4
ENSMUSG00000056306	584.152	-0.554194	0.255636	-2.1679	0.0301663	0.280935	Sertm1
ENSMUSG00000058498	185.519	0.473793	0.218597	2.16743	0.0302024	0.280957	Rnf207
ENSMUSG00000026014	1445.95	-0.326935	0.150832	-2.16754	0.0301939	0.280957	Raph1
ENSMUSG00000024440	12.3538	-1.68436	0.777463	-2.16648	0.0302745	0.281066	Pcdh12
ENSMUSG00000095105	15.9633	1.99179	0.919603	2.16593	0.0303169	0.281066	Edaradd
ENSMUSG00000035435	23.8018	-0.967485	0.446751	-2.1656	0.0303414	0.281066	Abca17
ENSMUSG00000024869	38.5444	0.87052	0.401857	2.16624	0.0302926	0.281066	Gm49405
ENSMUSG00000037143	60.8026	-0.545632	0.251895	-2.16611	0.0303031	0.281066	Cfap61
ENSMUSG00000026646	90.8005	-0.623652	0.287983	-2.16559	0.0303429	0.281066	Suv39h2
ENSMUSG00000020156	716.008	0.450399	0.207944	2.16596	0.0303142	0.281066	Mum1
ENSMUSG00000015377	1513.11	0.383315	0.176891	2.16696	0.030238	0.281066	Dennd6b
ENSMUSG00000008435	443.312	0.315431	0.145672	2.16535	0.0303607	0.281082	Rdh13
ENSMUSG00000009376	164.61	-0.755621	0.34909	-2.16455	0.0304225	0.281359	Met
ENSMUSG00000058388	848.743	-0.262366	0.121211	-2.16454	0.0304229	0.281359	Phtf1
ENSMUSG00000020908	30.7793	-1.56948	0.725248	-2.16406	0.0304597	0.281511	Myh3
ENSMUSG00000066189	1621.81	-0.772418	0.356955	-2.16391	0.0304715	0.281511	Cacng3
ENSMUSG00000040260	3053.17	0.280184	0.129505	2.1635	0.0305028	0.281651	Daam2
ENSMUSG00000002633	83.1451	0.720748	0.333237	2.16287	0.0305511	0.281919	Shh
ENSMUSG00000026925	626.751	0.331559	0.153308	2.1627	0.0305641	0.281919	Inpp5e
ENSMUSG00000003849	87.0901	0.578804	0.267759	2.16166	0.0306441	0.282359	Nqo1
ENSMUSG00000033849	771.19	-0.488258	0.225852	-2.16185	0.03063	0.282359	B3galt2
ENSMUSG00000030704	8851.95	-0.35403	0.163825	-2.16103	0.0306933	0.282663	Rab6a
ENSMUSG00000109157	56.8963	-0.569194	0.263449	-2.16055	0.0307304	0.282855	Gm44829
ENSMUSG00000028066	70.7805	0.513015	0.237486	2.16019	0.030758	0.28296	Pmf1
ENSMUSG00000022829	1132.57	-0.479001	0.221856	-2.15906	0.0308453	0.283379	Stxbp5l
ENSMUSG00000030232	1428.32	-0.271373	0.125672	-2.15937	0.0308213	0.283379	Aebp2
ENSMUSG00000102543	1771.56	-0.740094	0.342799	-2.15898	0.0308521	0.283379	Pcdhgc5
ENSMUSG00000003559	160.131	0.607418	0.281387	2.15866	0.0308769	0.283457	As3mt
ENSMUSG00000014039	447.207	-0.282047	0.130692	-2.1581	0.0309199	0.283703	Prdm15
ENSMUSG00000024539	418.411	-0.408544	0.189357	-2.15753	0.0309641	0.283959	Ptpn2
ENSMUSG00000078889	108.059	0.424665	0.196869	2.1571	0.0309982	0.283961	Gm14288
ENSMUSG00000005043	134.099	0.577858	0.267937	2.1567	0.0310293	0.283961	Sgsh
ENSMUSG00000062110	315.184	-0.322757	0.149642	-2.15686	0.0310169	0.283961	Scfd2
ENSMUSG00000040675	318	0.314066	0.145615	2.15683	0.0310192	0.283961	Mthfd1l
ENSMUSG00000013089	1984.98	-0.477205	0.221294	-2.15643	0.03105	0.284001	Etv5
ENSMUSG00000022096	1233.67	0.666576	0.309307	2.15506	0.0311571	0.284832	Hr
ENSMUSG00000038007	338.148	0.562816	0.261255	2.15428	0.0312181	0.285241	Acer2
ENSMUSG00000001918	76.5189	0.636093	0.295326	2.15387	0.0312505	0.285387	Slc1a5
ENSMUSG00000098112	50.0657	-0.769104	0.357474	-2.15149	0.0314373	0.285763	Bin2
ENSMUSG00000021200	86.8473	0.746266	0.347008	2.15057	0.0315098	0.285763	Asb2
ENSMUSG00000091905	107.209	-0.656205	0.305117	-2.15066	0.0315028	0.285763	Gm6395
ENSMUSG00000028199	221.987	0.483246	0.224609	2.1515	0.031437	0.285763	Cryz
ENSMUSG00000103793	232.659	-0.500689	0.23278	-2.15092	0.0314829	0.285763	Pcdhga6
ENSMUSG00000034880	281.284	0.395277	0.183595	2.15299	0.0313198	0.285763	Mrpl34
ENSMUSG00000100131	281.132	-0.580627	0.269766	-2.15234	0.031371	0.285763	Gm28439
ENSMUSG00000004268	394.738	0.280909	0.130629	2.15044	0.0315206	0.285763	Emg1
ENSMUSG00000038805	423.182	0.683329	0.317748	2.15053	0.0315129	0.285763	Six3
ENSMUSG00000019763	472.378	-0.321436	0.149396	-2.15156	0.0314318	0.285763	Rmnd1
ENSMUSG00000031558	934.493	-0.394308	0.1833	-2.15117	0.0314629	0.285763	Slit2
ENSMUSG00000020794	1144.7	-0.375076	0.174287	-2.15206	0.031393	0.285763	Ube2g1
ENSMUSG00000026203	1502.65	0.548622	0.254948	2.1519	0.0314054	0.285763	Dnajb2
ENSMUSG00000027479	1879.64	-0.2924	0.135881	-2.15188	0.031407	0.285763	Mapre1
ENSMUSG00000010505	431.837	0.316866	0.147381	2.14998	0.0315564	0.285939	Myt1
ENSMUSG00000032322	39.8186	0.763127	0.35502	2.14953	0.0315924	0.286117	Pstpip1
ENSMUSG00000017390	14757.9	0.370803	0.172556	2.14889	0.0316432	0.286429	Aldoc
ENSMUSG00000035953	993.869	0.501889	0.233636	2.14816	0.0317008	0.286686	Pip4p1
ENSMUSG00000075376	1864.11	-0.288875	0.134478	-2.14812	0.0317045	0.286686	Rc3h2
ENSMUSG00000042207	1584.3	-0.32125	0.149577	-2.14773	0.0317352	0.286815	Kdm5b
ENSMUSG00000059631	15.2404	-1.14379	0.532632	-2.14743	0.0317591	0.286883	1500035N22Rik
ENSMUSG00000016559	2756.58	0.207626	0.096697	2.14718	0.0317789	0.286913	H3f3b
ENSMUSG00000103285	30.5708	-0.811197	0.378052	-2.14573	0.0318948	0.287134	Gm37274
ENSMUSG00000044949	253.701	-0.488871	0.227844	-2.14564	0.0319019	0.287134	Ubtd2
ENSMUSG00000071180	582.405	-0.257137	0.119794	-2.14649	0.031834	0.287134	Smim15
ENSMUSG00000025825	1076.38	0.450494	0.209928	2.14594	0.0318777	0.287134	Iscu
ENSMUSG00000028222	2376.43	-0.30647	0.142801	-2.14613	0.031863	0.287134	Calb1
ENSMUSG00000002985	23417.6	0.403915	0.188199	2.14621	0.0318564	0.287134	Apoe
ENSMUSG00000024331	24.9281	0.85317	0.3978	2.14472	0.0319752	0.287298	Dsc2
ENSMUSG00000037686	73.1717	0.936491	0.436677	2.14459	0.0319859	0.287298	Aspg
ENSMUSG00000021364	347.221	-0.378561	0.176508	-2.14473	0.0319748	0.287298	Elovl2
ENSMUSG00000061578	1905.22	-0.305245	0.142323	-2.14474	0.031974	0.287298	Ksr2
ENSMUSG00000028778	86.2542	0.760191	0.354559	2.14405	0.0320292	0.287538	Hcrtr1
ENSMUSG00000040441	97.5614	-0.609547	0.284379	-2.14343	0.0320787	0.28754	Slc26a10
ENSMUSG00000024901	490.189	0.445791	0.207961	2.14362	0.0320631	0.28754	Peli3
ENSMUSG00000020687	1402.9	-0.364312	0.169956	-2.14356	0.032068	0.28754	Cdc27
ENSMUSG00000111656	12.4565	1.14238	0.5331	2.1429	0.0321212	0.287773	Gm47232
ENSMUSG00000094626	988.988	-0.867404	0.404854	-2.14251	0.0321523	0.287904	Tmem121b
ENSMUSG00000051146	1865.21	0.784655	0.366375	2.14167	0.0322199	0.288214	Camk2n2
ENSMUSG00000026103	6688.98	-0.294635	0.137561	-2.14185	0.0322058	0.288214	Gls
ENSMUSG00000085527	44.1942	-0.70014	0.326978	-2.14125	0.0322542	0.288356	Gm15535
ENSMUSG00000087528	145.15	-0.528107	0.246679	-2.14086	0.0322851	0.288356	9830144P21Rik
ENSMUSG00000036046	4072.7	0.39366	0.183879	2.14086	0.0322853	0.288356	5031439G07Rik
ENSMUSG00000039831	608	-0.434366	0.202919	-2.14059	0.0323073	0.288405	Arhgap29
ENSMUSG00000049265	534.179	0.557637	0.260576	2.14001	0.0323536	0.288465	Kcnk3
ENSMUSG00000027993	7406.54	-0.326669	0.152657	-2.13989	0.0323635	0.288465	Trim2
ENSMUSG00000009394	8585.08	-0.395717	0.184897	-2.1402	0.0323385	0.288465	Syn2
ENSMUSG00000024228	140.852	0.452668	0.211581	2.13945	0.0323989	0.288633	Nudt12
ENSMUSG00000089818	28.5616	-1.00096	0.468092	-2.13838	0.0324855	0.289187	Gm15950
ENSMUSG00000013846	681.587	-0.338213	0.158171	-2.13828	0.0324943	0.289187	St3gal1
ENSMUSG00000029859	18.6747	0.967738	0.452781	2.13732	0.0325721	0.28965	Epha1
ENSMUSG00000026955	32.0746	0.795151	0.372048	2.13723	0.0325794	0.28965	Sapcd2
ENSMUSG00000104988	40.6619	-0.72983	0.341652	-2.13618	0.0326646	0.289872	Gm43622
ENSMUSG00000038085	68.5626	0.557295	0.260893	2.13611	0.0326707	0.289872	Cnbd2
ENSMUSG00000026491	1318.45	-0.343799	0.160939	-2.13621	0.0326625	0.289872	Ahctf1
ENSMUSG00000017734	1455.59	0.346077	0.162003	2.13623	0.0326604	0.289872	Dbndd2
ENSMUSG00000055538	2225.23	0.346903	0.162429	2.13572	0.0327026	0.290007	Zcchc24
ENSMUSG00000087466	31.3322	0.967258	0.453043	2.13503	0.0327588	0.2902	A330041J22Rik
ENSMUSG00000050212	36.6959	0.754406	0.353331	2.13513	0.0327505	0.2902	Eva1b
ENSMUSG00000023066	119.703	0.488514	0.228904	2.13414	0.0328309	0.2902	Rttn
ENSMUSG00000036764	216.41	0.62452	0.292729	2.13344	0.0328883	0.2902	Dnajc12
ENSMUSG00000026078	350.379	0.439956	0.206194	2.1337	0.0328671	0.2902	Pdcl3
ENSMUSG00000060301	591.512	-0.447759	0.209817	-2.13404	0.0328392	0.2902	2610008E11Rik
ENSMUSG00000025477	1317.78	0.355372	0.166476	2.13467	0.0327881	0.2902	Inpp5a
ENSMUSG00000006522	1315.99	1.16308	0.545222	2.13322	0.032907	0.2902	Itih3
ENSMUSG00000040446	1756.34	-0.356861	0.167281	-2.13331	0.0328995	0.2902	Rprd1a
ENSMUSG00000045092	2008.33	-0.33388	0.156475	-2.13376	0.0328623	0.2902	S1pr1
ENSMUSG00000021719	7979.45	-0.54449	0.25512	-2.13425	0.032822	0.2902	Rgs7bp
ENSMUSG00000018143	282.136	0.370718	0.173826	2.13269	0.0329498	0.290347	Mafk
ENSMUSG00000057863	1168.43	0.457174	0.214382	2.13252	0.0329638	0.290347	Rpl36
ENSMUSG00000021124	1784.42	-0.346843	0.162653	-2.1324	0.0329736	0.290347	Vti1b
ENSMUSG00000089417	206.347	0.868392	0.407364	2.13174	0.0330286	0.290685	Gm22009
ENSMUSG00000097504	97.7325	0.566078	0.265686	2.13063	0.0331196	0.291339	4930516B21Rik
ENSMUSG00000073437	58.5802	-0.587454	0.275756	-2.13034	0.0331435	0.291402	D330041H03Rik
ENSMUSG00000052681	1173.73	-0.272286	0.127867	-2.12945	0.0332173	0.291905	Rap1b
ENSMUSG00000049606	1374.07	-0.398141	0.187016	-2.12891	0.0332616	0.292147	Zfp644
ENSMUSG00000037977	93.2986	0.817383	0.384021	2.12848	0.0332969	0.29231	6430571L13Rik
ENSMUSG00000079076	21.0133	-0.836517	0.393382	-2.12647	0.0334638	0.292764	Gm3086
ENSMUSG00000024312	182.34	0.323855	0.152252	2.1271	0.0334115	0.292764	Wdr46
ENSMUSG00000056972	271.149	1.39404	0.655695	2.12605	0.0334994	0.292764	Magel2
ENSMUSG00000027597	384.737	0.452675	0.212836	2.12688	0.0334303	0.292764	Ahcy
ENSMUSG00000049001	426.187	-0.474096	0.222844	-2.12748	0.0333798	0.292764	Ndnf
ENSMUSG00000009292	1070.71	0.314532	0.147934	2.12616	0.0334899	0.292764	Trpm2
ENSMUSG00000035051	1080.86	-0.300227	0.141159	-2.12687	0.033431	0.292764	Dhx57
ENSMUSG00000016831	1436.1	-0.226032	0.1063	-2.12636	0.0334731	0.292764	Tox4
ENSMUSG00000022752	4463.09	-0.351828	0.165438	-2.12664	0.0334497	0.292764	Tomm70a
[truncated: 16,181 more rows]

## Sheet: P42_Ca_sig
	Gene ID	log2FoldChange	padj	Gene Name	Gene Description
1	ENSMUSG00000045871	2.293	1.95729e-13	Slitrk6	SLIT and NTRK-like family, member 6 [Source:MGI Symbol;Acc:MGI:2443198]
2	ENSMUSG00000019768	3.44876	1.56753e-12	Esr1	estrogen receptor 1 (alpha) [Source:MGI Symbol;Acc:MGI:1352467]
3	ENSMUSG00000000125	1.894	1.5213e-10	Wnt3	wingless-type MMTV integration site family, member 3 [Source:MGI Symbol;Acc:MGI:98955]
4	ENSMUSG00000050315	2.13667	2.77987e-10	Synpo2	synaptopodin 2 [Source:MGI Symbol;Acc:MGI:2153070]
5	ENSMUSG00000090121	3.46221	5.05792e-09	Abhd12b	abhydrolase domain containing 12B [Source:MGI Symbol;Acc:MGI:2685650]
6	ENSMUSG00000005667	1.26046	1.61034e-06	Mthfd2	methylenetetrahydrofolate dehydrogenase (NAD+ dependent), methenyltetrahydrofolate cyclohydrolase [Source:MGI Symbol;Acc:MGI:1338850]
7	ENSMUSG00000040624	1.55108	6.25992e-06	Plekhg1	pleckstrin homology domain containing, family G (with RhoGef domain) member 1 [Source:MGI Symbol;Acc:MGI:2676551]
8	ENSMUSG00000031297	1.07507	1.38624e-05	Slc7a3	solute carrier family 7 (cationic amino acid transporter, y+ system), member 3 [Source:MGI Symbol;Acc:MGI:1100521]
9	ENSMUSG00000032776	1.33421	2.04443e-05	Mctp2	multiple C2 domains, transmembrane 2 [Source:MGI Symbol;Acc:MGI:2685335]
10	ENSMUSG00000037568	1.08581	2.04443e-05	Vash2	vasohibin 2 [Source:MGI Symbol;Acc:MGI:2444826]
11	ENSMUSG00000027860	1.33398	3.82921e-05	Vangl1	VANGL planar cell polarity 1 [Source:MGI Symbol;Acc:MGI:2159344]
12	ENSMUSG00000055632	1.80764	4.20191e-05	Hmcn2	hemicentin 2 [Source:MGI Symbol;Acc:MGI:2677838]
13	ENSMUSG00000013076	1.30305	4.20191e-05	Amotl1	angiomotin-like 1 [Source:MGI Symbol;Acc:MGI:1922973]
14	ENSMUSG00000047281	1.62389	5.35952e-05	Sfn	stratifin [Source:MGI Symbol;Acc:MGI:1891831]
15	ENSMUSG00000064179	2.22774	5.40626e-05	Tnnt1	troponin T1, skeletal, slow [Source:MGI Symbol;Acc:MGI:1333868]
16	ENSMUSG00000046500	2.25199	6.83221e-05	Fam19a4	TAFA chemokine like family member 4 [Source:MGI Symbol;Acc:MGI:2444563]
17	ENSMUSG00000027313	1.71203	0.000161372	Chac1	ChaC, cation transport regulator 1 [Source:MGI Symbol;Acc:MGI:1916315]
18	ENSMUSG00000034579	1.1419	0.000261921	Pla2g3	phospholipase A2, group III [Source:MGI Symbol;Acc:MGI:2444945]
19	ENSMUSG00000026475	1.73726	0.000278322	Rgs16	regulator of G-protein signaling 16 [Source:MGI Symbol;Acc:MGI:108407]
20	ENSMUSG00000105843	1.13939	0.000278322	Gm19439	predicted gene, 19439 [Source:MGI Symbol;Acc:MGI:5011624]
21	ENSMUSG00000033721	1.32885	0.000367688	Vav3	vav 3 oncogene [Source:MGI Symbol;Acc:MGI:1888518]
22	ENSMUSG00000036353	-0.982401	0.000367688	P2ry12	purinergic receptor P2Y, G-protein coupled 12 [Source:MGI Symbol;Acc:MGI:1918089]
23	ENSMUSG00000032373	-1.24626	0.000484168	Car12	carbonic anhydrase 12 [Source:MGI Symbol;Acc:MGI:1923709]
24	ENSMUSG00000011171	1.2254	0.000513763	Vipr2	vasoactive intestinal peptide receptor 2 [Source:MGI Symbol;Acc:MGI:107166]
25	ENSMUSG00000059857	1.19166	0.000517716	Ntng1	netrin G1 [Source:MGI Symbol;Acc:MGI:1934028]
26	ENSMUSG00000034990	3.31359	0.000538446	Otoa	otoancorin [Source:MGI Symbol;Acc:MGI:2149209]
27	ENSMUSG00000036181	0.996526	0.000538446	Hist1h1c	H1.2 linker histone, cluster member [Source:MGI Symbol;Acc:MGI:1931526]
28	ENSMUSG00000110631	1.43066	0.000563732	Gm42047	predicted gene, 42047 [Source:MGI Symbol;Acc:MGI:5624932]
29	ENSMUSG00000021186	1.12944	0.000695623	Fbln5	fibulin 5 [Source:MGI Symbol;Acc:MGI:1346091]
30	ENSMUSG00000074968	-1.74072	0.000695623	Ano3	anoctamin 3 [Source:MGI Symbol;Acc:MGI:3613666]
31	ENSMUSG00000020732	2.00378	0.000765493	Rab37	RAB37, member RAS oncogene family [Source:MGI Symbol;Acc:MGI:1929945]
32	ENSMUSG00000073418	0.985235	0.000854773	C4b	complement component 4B (Chido blood group) [Source:MGI Symbol;Acc:MGI:88228]
33	ENSMUSG00000019232	1.15711	0.00159781	Etnppl	ethanolamine phosphate phospholyase [Source:MGI Symbol;Acc:MGI:1919010]
34	ENSMUSG00000074818	0.666019	0.0016778	Pdzd7	PDZ domain containing 7 [Source:MGI Symbol;Acc:MGI:3608325]
35	ENSMUSG00000007682	-1.10917	0.0016778	Dio2	deiodinase, iodothyronine, type II [Source:MGI Symbol;Acc:MGI:1338833]
36	ENSMUSG00000062542	1.1925	0.00171015	Syt9	synaptotagmin IX [Source:MGI Symbol;Acc:MGI:1926373]
37	ENSMUSG00000069917	-3.18748	0.00174662	Hba-a2	hemoglobin alpha, adult chain 2 [Source:MGI Symbol;Acc:MGI:96016]
38	ENSMUSG00000027985	1.08608	0.00203397	Lef1	lymphoid enhancer binding factor 1 [Source:MGI Symbol;Acc:MGI:96770]
39	ENSMUSG00000027654	1.22282	0.00208157	Fam83d	family with sequence similarity 83, member D [Source:MGI Symbol;Acc:MGI:1919128]
40	ENSMUSG00000061859	1.45044	0.00210161	Patj	PATJ, crumbs cell polarity complex component [Source:MGI Symbol;Acc:MGI:1277960]
41	ENSMUSG00000092627	3.06684	0.00233933	D130058E05Rik	RIKEN cDNA D130058E05 gene [Source:MGI Symbol;Acc:MGI:2444614]
42	ENSMUSG00000047786	-0.837925	0.00237822	Lix1	limb and CNS expressed 1 [Source:MGI Symbol;Acc:MGI:1913893]
43	ENSMUSG00000031997	-1.22533	0.00299363	Trpc6	transient receptor potential cation channel, subfamily C, member 6 [Source:MGI Symbol;Acc:MGI:109523]
44	ENSMUSG00000018486	2.49613	0.00307059	Wnt9b	wingless-type MMTV integration site family, member 9B [Source:MGI Symbol;Acc:MGI:1197020]
45	ENSMUSG00000002910	1.04333	0.0031145	Arrdc2	arrestin domain containing 2 [Source:MGI Symbol;Acc:MGI:1918057]
46	ENSMUSG00000034486	2.98907	0.00360551	Gbx2	gastrulation brain homeobox 2 [Source:MGI Symbol;Acc:MGI:95668]
47	ENSMUSG00000020262	0.618959	0.0043516	Adarb1	adenosine deaminase, RNA-specific, B1 [Source:MGI Symbol;Acc:MGI:891999]
48	ENSMUSG00000103899	-1.33046	0.00445831	Gm37940	predicted gene, 37940 [Source:MGI Symbol;Acc:MGI:5611168]
49	ENSMUSG00000004035	0.728719	0.00476618	Gstm7	glutathione S-transferase, mu 7 [Source:MGI Symbol;Acc:MGI:1915562]
50	ENSMUSG00000024907	2.70407	0.00519001	Gal	galanin and GMAP prepropeptide [Source:MGI Symbol;Acc:MGI:95637]
51	ENSMUSG00000071176	0.604463	0.00519001	Arhgef10	Rho guanine nucleotide exchange factor (GEF) 10 [Source:MGI Symbol;Acc:MGI:2444453]
52	ENSMUSG00000021948	2.55306	0.00519001	Prkcd	protein kinase C, delta [Source:MGI Symbol;Acc:MGI:97598]
53	ENSMUSG00000022548	0.865778	0.00519001	Apod	apolipoprotein D [Source:MGI Symbol;Acc:MGI:88056]
54	ENSMUSG00000050234	1.12399	0.00538839	Gja4	gap junction protein, alpha 4 [Source:MGI Symbol;Acc:MGI:95715]
55	ENSMUSG00000037727	3.61995	0.00593443	Avp	arginine vasopressin [Source:MGI Symbol;Acc:MGI:88121]
56	ENSMUSG00000050830	0.794492	0.00700589	Vwc2	von Willebrand factor C domain containing 2 [Source:MGI Symbol;Acc:MGI:2442987]
57	ENSMUSG00000030494	0.880958	0.00725468	Rhpn2	rhophilin, Rho GTPase binding protein 2 [Source:MGI Symbol;Acc:MGI:1289234]
58	ENSMUSG00000058488	-1.61411	0.00733615	Kl	klotho [Source:MGI Symbol;Acc:MGI:1101771]
59	ENSMUSG00000028893	1.03764	0.00791081	Sesn2	sestrin 2 [Source:MGI Symbol;Acc:MGI:2651874]
60	ENSMUSG00000075538	-1.91982	0.00930643	Gm10855	predicted gene 10855 [Source:MGI Symbol;Acc:MGI:3641819]
61	ENSMUSG00000041842	1.0365	0.00930643	Fhdc1	FH2 domain containing 1 [Source:MGI Symbol;Acc:MGI:2684972]
62	ENSMUSG00000104362	-1.11007	0.00930643	Gm37928	predicted gene, 37928 [Source:MGI Symbol;Acc:MGI:5611156]
63	ENSMUSG00000015852	-0.726652	0.00931076	Fcrls	Fc receptor-like S, scavenger receptor [Source:MGI Symbol;Acc:MGI:1933397]
64	ENSMUSG00000024727	1.48935	0.00952829	Trpm6	transient receptor potential cation channel, subfamily M, member 6 [Source:MGI Symbol;Acc:MGI:2675603]
65	ENSMUSG00000032890	0.876819	0.00952829	Rims3	regulating synaptic membrane exocytosis 3 [Source:MGI Symbol;Acc:MGI:2443331]
66	ENSMUSG00000001588	3.19662	0.0103375	Acap1	ArfGAP with coiled-coil, ankyrin repeat and PH domains 1 [Source:MGI Symbol;Acc:MGI:2388270]
67	ENSMUSG00000003746	-0.59512	0.0103375	Man1a	mannosidase 1, alpha [Source:MGI Symbol;Acc:MGI:104677]
68	ENSMUSG00000022656	-0.590684	0.0111525	Nectin3	nectin cell adhesion molecule 3 [Source:MGI Symbol;Acc:MGI:1930171]
69	ENSMUSG00000032238	0.675109	0.0111525	Rora	RAR-related orphan receptor alpha [Source:MGI Symbol;Acc:MGI:104661]
70	ENSMUSG00000116557	-1.87193	0.0118564	AC118542.1	RIKEN cDNA 4933432I09 gene [Source:MGI Symbol;Acc:MGI:1914029]
71	ENSMUSG00000052336	-0.592098	0.0120301	Cx3cr1	chemokine (C-X3-C motif) receptor 1 [Source:MGI Symbol;Acc:MGI:1333815]
72	ENSMUSG00000060639	1.64809	0.0120659	Hist1h4i	H4 clustered histone 9 [Source:MGI Symbol;Acc:MGI:2448432]
73	ENSMUSG00000062760	0.663052	0.0125236	Shisal1	shisa like 1 [Source:MGI Symbol;Acc:MGI:1919551]
74	ENSMUSG00000044317	1.0355	0.0127781	Gpr4	G protein-coupled receptor 4 [Source:MGI Symbol;Acc:MGI:2441992]
75	ENSMUSG00000085873	1.13172	0.0138282	Ttc39aos1	Ttc39a opposite strand RNA 1 [Source:MGI Symbol;Acc:MGI:3651956]
76	ENSMUSG00000004328	1.11987	0.0138282	Hif3a	hypoxia inducible factor 3, alpha subunit [Source:MGI Symbol;Acc:MGI:1859778]
77	ENSMUSG00000029769	0.630544	0.0145098	Ccdc136	coiled-coil domain containing 136 [Source:MGI Symbol;Acc:MGI:1918128]
78	ENSMUSG00000050549	-1.0791	0.0147969	Fam241a	family with sequence similarity 241, member A [Source:MGI Symbol;Acc:MGI:1917867]
79	ENSMUSG00000048540	1.50898	0.0147969	Nhlh2	nescient helix loop helix 2 [Source:MGI Symbol;Acc:MGI:97324]
80	ENSMUSG00000033342	-0.691639	0.0147969	Plppr5	phospholipid phosphatase related 5 [Source:MGI Symbol;Acc:MGI:1923019]
81	ENSMUSG00000026571	-0.76007	0.0147969	Dcaf6	DDB1 and CUL4 associated factor 6 [Source:MGI Symbol;Acc:MGI:1921356]
82	ENSMUSG00000091712	0.707544	0.0149258	Sec14l5	SEC14-like lipid binding 5 [Source:MGI Symbol;Acc:MGI:3616084]
83	ENSMUSG00000066129	0.700818	0.016961	Kndc1	kinase non-catalytic C-lobe domain (KIND) containing 1 [Source:MGI Symbol;Acc:MGI:1923734]
84	ENSMUSG00000022246	-0.830877	0.0169848	Rai14	retinoic acid induced 14 [Source:MGI Symbol;Acc:MGI:1922896]
85	ENSMUSG00000006362	-0.844344	0.0169848	Cbfa2t3	CBFA2/RUNX1 translocation partner 3 [Source:MGI Symbol;Acc:MGI:1338013]
86	ENSMUSG00000041324	-1.12484	0.0184037	Inhba	inhibin beta-A [Source:MGI Symbol;Acc:MGI:96570]
87	ENSMUSG00000044361	1.59359	0.0186368	BC024139	cDNA sequence BC024139 [Source:MGI Symbol;Acc:MGI:2442591]
88	ENSMUSG00000030730	2.4965	0.0186368	Atp2a1	ATPase, Ca++ transporting, cardiac muscle, fast twitch 1 [Source:MGI Symbol;Acc:MGI:105058]
89	ENSMUSG00000007279	1.27825	0.0186368	Scube2	signal peptide, CUB domain, EGF-like 2 [Source:MGI Symbol;Acc:MGI:1928765]
90	ENSMUSG00000004098	1.60682	0.0186368	Col5a3	collagen, type V, alpha 3 [Source:MGI Symbol;Acc:MGI:1858212]
91	ENSMUSG00000028581	-0.595543	0.0186368	Laptm5	lysosomal-associated protein transmembrane 5 [Source:MGI Symbol;Acc:MGI:108046]
92	ENSMUSG00000041046	1.61597	0.0200564	Ramp3	receptor (calcitonin) activity modifying protein 3 [Source:MGI Symbol;Acc:MGI:1860292]
93	ENSMUSG00000032338	1.21124	0.0207749	Hcn4	hyperpolarization-activated, cyclic nucleotide-gated K+ 4 [Source:MGI Symbol;Acc:MGI:1298209]
94	ENSMUSG00000070369	1.65226	0.0215129	Itgad	integrin, alpha D [Source:MGI Symbol;Acc:MGI:3578624]
95	ENSMUSG00000110408	1.90956	0.0218062	Gm45881
96	ENSMUSG00000042804	0.938344	0.0229379	Gpr153	G protein-coupled receptor 153 [Source:MGI Symbol;Acc:MGI:1916157]
97	ENSMUSG00000026827	-0.71836	0.0233357	Gpd2	glycerol phosphate dehydrogenase 2, mitochondrial [Source:MGI Symbol;Acc:MGI:99778]
98	ENSMUSG00000066760	0.748106	0.0237408	Psg16	pregnancy specific beta-1-glycoprotein 16 [Source:MGI Symbol;Acc:MGI:1347249]
99	ENSMUSG00000004894	1.32824	0.0237408	Hapln2	hyaluronan and proteoglycan link protein 2 [Source:MGI Symbol;Acc:MGI:2137300]
100	ENSMUSG00000025370	-1.02965	0.0244096	Cdh9	cadherin 9 [Source:MGI Symbol;Acc:MGI:107433]
101	ENSMUSG00000069919	-1.99676	0.0257321	Hba-a1	hemoglobin alpha, adult chain 1 [Source:MGI Symbol;Acc:MGI:96015]
102	ENSMUSG00000036098	0.778538	0.0257321	Myrf	myelin regulatory factor [Source:MGI Symbol;Acc:MGI:2684944]
103	ENSMUSG00000048440	0.828114	0.0268323	Cyp4f16	cytochrome P450, family 4, subfamily f, polypeptide 16 [Source:MGI Symbol;Acc:MGI:1917351]
104	ENSMUSG00000071604	0.698379	0.0273349	Fam189a2	endosomal transmembrane epsin interactor 1 [Source:MGI Symbol;Acc:MGI:2685813]
105	ENSMUSG00000020251	-1.57955	0.0283014	Glt8d2	glycosyltransferase 8 domain containing 2 [Source:MGI Symbol;Acc:MGI:1922032]
106	ENSMUSG00000107585	-0.778677	0.030089	3300002P13Rik	RIKEN cDNA 3300002P13 gene [Source:MGI Symbol;Acc:MGI:1917480]
107	ENSMUSG00000074892	0.694937	0.030313	B3galt5	UDP-Gal:betaGlcNAc beta 1,3-galactosyltransferase, polypeptide 5 [Source:MGI Symbol;Acc:MGI:2136878]
108	ENSMUSG00000033965	-0.820671	0.0304169	Slc16a2	solute carrier family 16 (monocarboxylic acid transporters), member 2 [Source:MGI Symbol;Acc:MGI:1203732]
109	ENSMUSG00000040723	0.689114	0.0308585	Rcsd1	RCSD domain containing 1 [Source:MGI Symbol;Acc:MGI:2676394]
110	ENSMUSG00000076441	0.933641	0.0314637	Ass1	argininosuccinate synthetase 1 [Source:MGI Symbol;Acc:MGI:88090]
111	ENSMUSG00000074673	1.22922	0.0322558	Ttll9	tubulin tyrosine ligase-like family, member 9 [Source:MGI Symbol;Acc:MGI:1913589]
112	ENSMUSG00000069581	2.44414	0.0326654	Tspear	thrombospondin type laminin G domain and EAR repeats [Source:MGI Symbol;Acc:MGI:2671932]
113	ENSMUSG00000029596	1.46829	0.0326654	Sdsl	serine dehydratase-like [Source:MGI Symbol;Acc:MGI:2182607]
114	ENSMUSG00000031431	0.599286	0.0326654	Tsc22d3	TSC22 domain family, member 3 [Source:MGI Symbol;Acc:MGI:1196284]
115	ENSMUSG00000075289	0.794368	0.0327429	Carns1	carnosine synthase 1 [Source:MGI Symbol;Acc:MGI:2147595]
116	ENSMUSG00000048251	-0.87872	0.0327429	Bcl11b	B cell leukemia/lymphoma 11B [Source:MGI Symbol;Acc:MGI:1929913]
117	ENSMUSG00000060981	1.77117	0.0330735	Hist1h4h	H4 clustered histone 8 [Source:MGI Symbol;Acc:MGI:2448427]
118	ENSMUSG00000025207	0.842029	0.0330735	Sema4g	sema domain, immunoglobulin domain (Ig), transmembrane domain (TM) and short cytoplasmic domain, (semaphorin) 4G [Source:MGI Symbol;Acc:MGI:1347047]
119	ENSMUSG00000021057	-1.11698	0.0330735	Akap5	A kinase (PRKA) anchor protein 5 [Source:MGI Symbol;Acc:MGI:2685104]
120	ENSMUSG00000079436	-1.57756	0.033987	Kcnj13	potassium inwardly-rectifying channel, subfamily J, member 13 [Source:MGI Symbol;Acc:MGI:3781032]
121	ENSMUSG00000002341	-0.767866	0.033987	Ncan	neurocan [Source:MGI Symbol;Acc:MGI:104694]
122	ENSMUSG00000097282	-1.73454	0.0347812	5031415H12Rik	RIKEN cDNA 5031415H12 gene [Source:MGI Symbol;Acc:MGI:1923234]
123	ENSMUSG00000029420	-0.681755	0.0347812	Rimbp2	RIMS binding protein 2 [Source:MGI Symbol;Acc:MGI:2443235]
124	ENSMUSG00000048376	0.828535	0.0348402	F2r	coagulation factor II (thrombin) receptor [Source:MGI Symbol;Acc:MGI:101802]
125	ENSMUSG00000023942	0.792533	0.0348402	Slc29a1	solute carrier family 29 (nucleoside transporters), member 1 [Source:MGI Symbol;Acc:MGI:1927073]
126	ENSMUSG00000044788	0.888265	0.0350638	Fads6	fatty acid desaturase domain family, member 6 [Source:MGI Symbol;Acc:MGI:3039592]
127	ENSMUSG00000105352	-1.65957	0.0352653	C030018K13Rik	RIKEN cDNA C030018K13 gene [Source:MGI Symbol;Acc:MGI:1924632]
128	ENSMUSG00000049571	0.990424	0.0352653	Cfap46	cilia and flagella associated protein 46 [Source:MGI Symbol;Acc:MGI:2444387]
129	ENSMUSG00000036273	-0.957019	0.0382462	Lrrk2	leucine-rich repeat kinase 2 [Source:MGI Symbol;Acc:MGI:1913975]
130	ENSMUSG00000109890	-1.46745	0.0385068	AU023762	expressed sequence AU023762 [Source:MGI Symbol;Acc:MGI:2143225]
131	ENSMUSG00000024691	-1.80181	0.0386633	Fam111a	family with sequence similarity 111, member A [Source:MGI Symbol;Acc:MGI:1915508]
132	ENSMUSG00000020604	0.725583	0.0386633	Arsg	arylsulfatase G [Source:MGI Symbol;Acc:MGI:1921258]
133	ENSMUSG00000041801	1.17513	0.0386633	Phlda3	pleckstrin homology like domain, family A, member 3 [Source:MGI Symbol;Acc:MGI:1351485]
134	ENSMUSG00000021228	-1.43609	0.039077	Acot3	acyl-CoA thioesterase 3 [Source:MGI Symbol;Acc:MGI:2159619]
135	ENSMUSG00000039450	1.03044	0.039077	Dcxr	dicarbonyl L-xylulose reductase [Source:MGI Symbol;Acc:MGI:1915130]
136	ENSMUSG00000005611	1.33499	0.039077	Mrvi1	inositol 1,4,5-triphosphate receptor associated 1 [Source:MGI Symbol;Acc:MGI:1338023]
137	ENSMUSG00000108584	-1.83923	0.0401015	Gm45216	predicted gene 45216 [Source:MGI Symbol;Acc:MGI:5753792]
138	ENSMUSG00000058159	1.51269	0.0401015	T2	brachyury 2 [Source:MGI Symbol;Acc:MGI:104658]
139	ENSMUSG00000097233	0.875668	0.0401015	Gm17552	predicted gene, 17552 [Source:MGI Symbol;Acc:MGI:4937186]
140	ENSMUSG00000031492	1.02947	0.0401015	Chrnb3	cholinergic receptor, nicotinic, beta polypeptide 3 [Source:MGI Symbol;Acc:MGI:106212]
141	ENSMUSG00000048677	0.707086	0.0401015	Tpcn2	two pore segment channel 2 [Source:MGI Symbol;Acc:MGI:2385297]
142	ENSMUSG00000045917	0.678527	0.0401015	Tmem268	transmembrane protein 268 [Source:MGI Symbol;Acc:MGI:1913920]
143	ENSMUSG00000029086	-0.589261	0.0401015	Prom1	prominin 1 [Source:MGI Symbol;Acc:MGI:1100886]
144	ENSMUSG00000030609	0.724167	0.0401015	Aen	apoptosis enhancing nuclease [Source:MGI Symbol;Acc:MGI:1915298]
145	ENSMUSG00000059810	0.893728	0.0401015	Rgs3	regulator of G-protein signaling 3 [Source:MGI Symbol;Acc:MGI:1354734]
146	ENSMUSG00000039706	-0.647064	0.0401015	Ldb2	LIM domain binding 2 [Source:MGI Symbol;Acc:MGI:894670]
147	ENSMUSG00000014846	0.970892	0.0401015	Tppp3	tubulin polymerization-promoting protein family member 3 [Source:MGI Symbol;Acc:MGI:1915221]
148	ENSMUSG00000008393	0.604748	0.0401015	Carhsp1	calcium regulated heat stable protein 1 [Source:MGI Symbol;Acc:MGI:1196368]
149	ENSMUSG00000015143	-0.925525	0.0401015	Actn1	actinin, alpha 1 [Source:MGI Symbol;Acc:MGI:2137706]
150	ENSMUSG00000039943	0.683738	0.0401015	Plcb4	phospholipase C, beta 4 [Source:MGI Symbol;Acc:MGI:107464]
151	ENSMUSG00000030134	-0.784497	0.0401015	Rasgef1a	RasGEF domain family, member 1A [Source:MGI Symbol;Acc:MGI:1917977]
152	ENSMUSG00000043753	1.56897	0.0405786	Dmrta1	doublesex and mab-3 related transcription factor like family A1 [Source:MGI Symbol;Acc:MGI:2653627]
153	ENSMUSG00000116029	1.67256	0.0412969	Gm41414	predicted gene, 41414 [Source:MGI Symbol;Acc:MGI:5624299]
154	ENSMUSG00000109868	1.21136	0.0412969	Gm39244	predicted gene, 39244 [Source:MGI Symbol;Acc:MGI:5622129]
155	ENSMUSG00000038115	-1.02589	0.0412969	Ano2	anoctamin 2 [Source:MGI Symbol;Acc:MGI:2387214]
156	ENSMUSG00000035513	-0.741645	0.0412969	Ntng2	netrin G2 [Source:MGI Symbol;Acc:MGI:2159341]
157	ENSMUSG00000025854	0.693067	0.042549	Fam20c	FAM20C, golgi associated secretory pathway kinase [Source:MGI Symbol;Acc:MGI:2136853]
158	ENSMUSG00000052848	-0.863535	0.0427254	C130026L21Rik	RIKEN cDNA C130026L21 gene [Source:MGI Symbol;Acc:MGI:3041189]
159	ENSMUSG00000028977	0.952241	0.0427254	Casz1	castor zinc finger 1 [Source:MGI Symbol;Acc:MGI:1196251]
160	ENSMUSG00000059049	-0.808514	0.042916	Frem1	Fras1 related extracellular matrix protein 1 [Source:MGI Symbol;Acc:MGI:2670972]
161	ENSMUSG00000005447	1.00415	0.042916	Pafah1b3	platelet-activating factor acetylhydrolase, isoform 1b, subunit 3 [Source:MGI Symbol;Acc:MGI:108414]
162	ENSMUSG00000026564	1.68103	0.0432609	Dusp27	dual specificity phosphatase 27 (putative) [Source:MGI Symbol;Acc:MGI:2685055]
163	ENSMUSG00000043498	-0.742701	0.0432609	9330132A10Rik
164	ENSMUSG00000038319	0.863432	0.0432609	Kcnh2	potassium voltage-gated channel, subfamily H (eag-related), member 2 [Source:MGI Symbol;Acc:MGI:1341722]
165	ENSMUSG00000008575	-0.84121	0.0435091	Nfib	nuclear factor I/B [Source:MGI Symbol;Acc:MGI:103188]
166	ENSMUSG00000033453	0.977151	0.0446412	Adamts15	a disintegrin-like and metallopeptidase (reprolysin type) with thrombospondin type 1 motif, 15 [Source:MGI Symbol;Acc:MGI:2449569]
167	ENSMUSG00000055235	-1.39477	0.0456808	Wdr86	WD repeat domain 86 [Source:MGI Symbol;Acc:MGI:1915466]
168	ENSMUSG00000059434	2.32606	0.0460892	Gckr	glucokinase regulatory protein [Source:MGI Symbol;Acc:MGI:1096345]
169	ENSMUSG00000046338	1.47673	0.0460892	Gpat2	glycerol-3-phosphate acyltransferase 2, mitochondrial [Source:MGI Symbol;Acc:MGI:2684962]
170	ENSMUSG00000040740	0.812384	0.0460892	Slc25a34	solute carrier family 25, member 34 [Source:MGI Symbol;Acc:MGI:2686215]
171	ENSMUSG00000026730	-1.15147	0.0467954	Pter	phosphotriesterase related [Source:MGI Symbol;Acc:MGI:107372]
172	ENSMUSG00000041660	1.17598	0.0470474	Bbox1	butyrobetaine (gamma), 2-oxoglutarate dioxygenase 1 (gamma-butyrobetaine hydroxylase) [Source:MGI Symbol;Acc:MGI:1891372]
173	ENSMUSG00000097305	1.09914	0.0473228	Gm17276	predicted gene, 17276 [Source:MGI Symbol;Acc:MGI:4936910]
174	ENSMUSG00000021587	-0.617774	0.0476309	Pcsk1	proprotein convertase subtilisin/kexin type 1 [Source:MGI Symbol;Acc:MGI:97511]
175	ENSMUSG00000041789	1.81572	0.0479544	2700046A07Rik	RIKEN cDNA 2700046A07 gene [Source:MGI Symbol;Acc:MGI:1919803]
176	ENSMUSG00000026579	-1.06883	0.0479544	F5	coagulation factor V [Source:MGI Symbol;Acc:MGI:88382]
177	ENSMUSG00000028630	-0.818404	0.0481561	Dyrk2	dual-specificity tyrosine-(Y)-phosphorylation regulated kinase 2 [Source:MGI Symbol;Acc:MGI:1330301]
178	ENSMUSG00000029560	0.76061	0.0495696	Snx8	sorting nexin 8 [Source:MGI Symbol;Acc:MGI:2443816]
179	ENSMUSG00000033377	-0.952538	0.0495696	Palmd	palmdelphin [Source:MGI Symbol;Acc:MGI:2148896]
180	ENSMUSG00000006218	1.42097	0.0496278	Fam131c	family with sequence similarity 131, member C [Source:MGI Symbol;Acc:MGI:2685539]
181	ENSMUSG00000029360	-1.36978	0.0497948	Gm9754	predicted gene 9754 [Source:MGI Symbol;Acc:MGI:3704256]

## Sheet: P42_Ca ISR
Gene ID	log2FoldChange	padj	Gene Name	Gene description
ENSMUSG00000027313	1.71203	0.000161372	Chac1	ChaC, cation transport regulator 1 [Source:MGI Symbol;Acc:MGI:1916315]
ENSMUSG00000004098	1.60682	0.0186368	Col5a3	collagen, type V, alpha 3 [Source:MGI Symbol;Acc:MGI:1858212]
ENSMUSG00000013076	1.30305	4.20191e-05	Amotl1	angiomotin-like 1 [Source:MGI Symbol;Acc:MGI:1922973]
ENSMUSG00000005667	1.26046	1.61034e-06	Mthfd2	methylenetetrahydrofolate dehydrogenase (NAD+ dependent), methenyltetrahydrofolate cyclohydrolase [Source:MGI Symbol;Acc:MGI:1338850]
ENSMUSG00000027985	1.08608	0.00203397	Lef1	lymphoid enhancer binding factor 1 [Source:MGI Symbol;Acc:MGI:96770]
ENSMUSG00000031297	1.07507	1.38624e-05	Slc7a3	solute carrier family 7 (cationic amino acid transporter, y+ system), member 3 [Source:MGI Symbol;Acc:MGI:1100521]
ENSMUSG00000028893	1.03764	0.00791081	Sesn2	sestrin 2 [Source:MGI Symbol;Acc:MGI:2651874]
ENSMUSG00000036181	0.996526	0.000538446	Hist1h1c	H1.2 linker histone, cluster member [Source:MGI Symbol;Acc:MGI:1931526]
ENSMUSG00000030609	0.724167	0.0401015	Aen	apoptosis enhancing nuclease [Source:MGI Symbol;Acc:MGI:1915298]
ENSMUSG00000045917	0.678527	0.0401015	Tmem268	transmembrane protein 268 [Source:MGI Symbol;Acc:MGI:1913920]
ENSMUSG00000032238	0.675109	0.0111525	Rora	RAR-related orphan receptor alpha [Source:MGI Symbol;Acc:MGI:104661]
ENSMUSG00000074818	0.666019	0.0016778	Pdzd7	PDZ domain containing 7 [Source:MGI Symbol;Acc:MGI:3608325]
ENSMUSG00000008393	0.604748	0.0401015	Carhsp1	calcium regulated heat stable protein 1 [Source:MGI Symbol;Acc:MGI:1196368]
ENSMUSG00000071176	0.604463	0.00519001	Arhgef10	Rho guanine nucleotide exchange factor (GEF) 10 [Source:MGI Symbol;Acc:MGI:2444453]
ENSMUSG00000031431	0.599286	0.0326654	Tsc22d3	TSC22 domain family, member 3 [Source:MGI Symbol;Acc:MGI:1196284]
ENSMUSG00000039910	0.560411	0.00445831	Cited2	Cbp/p300-interacting transactivator, with Glu/Asp-rich carboxy-terminal domain, 2 [Source:MGI Symbol;Acc:MGI:1306784]
ENSMUSG00000031026	0.525939	0.0411425	Trim66	tripartite motif-containing 66 [Source:MGI Symbol;Acc:MGI:2152406]
ENSMUSG00000031770	0.521687	0.014488	Herpud1	homocysteine-inducible, endoplasmic reticulum stress-inducible, ubiquitin-like domain member 1 [Source:MGI Symbol;Acc:MGI:1927406]
ENSMUSG00000035649	-0.510783	0.036751	Zcchc7	zinc finger, CCHC domain containing 7 [Source:MGI Symbol;Acc:MGI:2442912]
ENSMUSG00000021057	-1.11698	0.0330735	Akap5	A kinase (PRKA) anchor protein 5 [Source:MGI Symbol;Acc:MGI:2685104]

## Sheet: P42_Ca ATF4-dep ISR
Gene ID	log2FoldChange	padj	Gene Name	Gene description
ENSMUSG00000027313	1.71203	0.000161372	Chac1	ChaC, cation transport regulator 1 [Source:MGI Symbol;Acc:MGI:1916315]
ENSMUSG00000013076	1.30305	4.20191e-05	Amotl1	angiomotin-like 1 [Source:MGI Symbol;Acc:MGI:1922973]
ENSMUSG00000005667	1.26046	1.61034e-06	Mthfd2	methylenetetrahydrofolate dehydrogenase (NAD+ dependent), methenyltetrahydrofolate cyclohydrolase [Source:MGI Symbol;Acc:MGI:1338850]
ENSMUSG00000031297	1.07507	1.38624e-05	Slc7a3	solute carrier family 7 (cationic amino acid transporter, y+ system), member 3 [Source:MGI Symbol;Acc:MGI:1100521]
ENSMUSG00000028893	1.03764	0.00791081	Sesn2	sestrin 2 [Source:MGI Symbol;Acc:MGI:2651874]
ENSMUSG00000045917	0.678527	0.0401015	Tmem268	transmembrane protein 268 [Source:MGI Symbol;Acc:MGI:1913920]
ENSMUSG00000032238	0.675109	0.0111525	Rora	RAR-related orphan receptor alpha [Source:MGI Symbol;Acc:MGI:104661]
ENSMUSG00000074818	0.666019	0.0016778	Pdzd7	PDZ domain containing 7 [Source:MGI Symbol;Acc:MGI:3608325]
ENSMUSG00000008393	0.604748	0.0401015	Carhsp1	calcium regulated heat stable protein 1 [Source:MGI Symbol;Acc:MGI:1196368]
ENSMUSG00000071176	0.604463	0.00519001	Arhgef10	Rho guanine nucleotide exchange factor (GEF) 10 [Source:MGI Symbol;Acc:MGI:2444453]
ENSMUSG00000031431	0.599286	0.0326654	Tsc22d3	TSC22 domain family, member 3 [Source:MGI Symbol;Acc:MGI:1196284]
ENSMUSG00000031026	0.525939	0.0411425	Trim66	tripartite motif-containing 66 [Source:MGI Symbol;Acc:MGI:2152406]
ENSMUSG00000031770	0.521687	0.014488	Herpud1	homocysteine-inducible, endoplasmic reticulum stress-inducible, ubiquitin-like domain member 1 [Source:MGI Symbol;Acc:MGI:1927406]

## Sheet: P42_Ca GO0002376 IR 
Gene ID	log2FoldChange	padj	Gene name
ENSMUSG00000019768	3.44876	1.56753e-12	Esr1
ENSMUSG00000024907	2.70407	0.00519001	Gal
ENSMUSG00000021948	2.55306	0.00519001	Prkcd
ENSMUSG00000070369	1.65226	0.0215129	Itgad
ENSMUSG00000033721	1.32885	0.000367688	Vav3
ENSMUSG00000034579	1.1419	0.000261921	Pla2g3
ENSMUSG00000027985	1.08608	0.00203397	Lef1
ENSMUSG00000073418	0.985235	0.000854773	C4b
ENSMUSG00000022548	0.865778	0.00519001	Apod
ENSMUSG00000048376	0.828535	0.0348402	F2r
ENSMUSG00000066760	0.748106	0.0237408	Psg16
ENSMUSG00000032238	0.675109	0.0111525	Rora
ENSMUSG00000031431	0.599286	0.0326654	Tsc22d3
ENSMUSG00000052336	-0.592098	0.0120301	Cx3cr1
ENSMUSG00000028581	-0.595543	0.0186368	Laptm5
ENSMUSG00000048251	-0.87872	0.0327429	Bcl11b
ENSMUSG00000036273	-0.957019	0.0382462	Lrrk2
ENSMUSG00000036353	-0.982401	0.000367688	P2ry12
ENSMUSG00000041324	-1.12484	0.0184037	Inhba
ENSMUSG00000069919	-1.99676	0.0257321	Hba-a1
ENSMUSG00000069917	-3.18748	0.00174662	Hba-a2

## Sheet: P42_Ca vs P75_Ca
Gene ID	Gene name	P42_Ca			P75_Ca
		log2FC	padj		log2FC	padj
ENSMUSG00000037727	Avp	3.61995	0.00593443		0.743396	0.00366361
ENSMUSG00000019768	Esr1	3.44876	1.56753e-12		3.88797	2.90531e-38
ENSMUSG00000055632	Hmcn2	1.80764	4.20191e-05		1.42126	0.000675564
ENSMUSG00000060981	Hist1h4h	1.77117	0.0330735		2.6242	1.33812e-08
ENSMUSG00000027313	Chac1	1.71203	0.000161372		1.98845	1.6812e-35
ENSMUSG00000070369	Itgad	1.65226	0.0215129		1.68926	0.0243248
ENSMUSG00000060639	Hist1h4i	1.64809	0.0120659		2.97185	4.0296e-08
ENSMUSG00000047281	Sfn	1.62389	5.35952e-05		1.63785	8.01269e-12
ENSMUSG00000110631	Gm42047	1.43066	0.000563732		2.13606	5.72723e-34
ENSMUSG00000005667	Mthfd2	1.26046	1.61034e-06		1.37065	1.47774e-20
ENSMUSG00000041801	Phlda3	1.17513	0.0386633		0.807677	4.21727e-07
ENSMUSG00000031297	Slc7a3	1.07507	1.38624e-05		1.37778	2.65427e-36
ENSMUSG00000028893	Sesn2	1.03764	0.00791081		2.16557	4.67558e-42
ENSMUSG00000039450	Dcxr	1.03044	0.039077		0.613501	0.0131714
ENSMUSG00000036181	Hist1h1c	0.996526	0.000538446		1.08829	0.00353837
ENSMUSG00000073418	C4b	0.985235	0.000854773		3.00731	5.6209e-19
ENSMUSG00000022548	Apod	0.865778	0.00519001		0.816126	0.00428568
ENSMUSG00000030609	Aen	0.724167	0.0401015		1.1815	7.36088e-14
ENSMUSG00000028581	Laptm5	-0.595543	0.0186368		1.13172	0.00567261
ENSMUSG00000038115	Ano2	-1.02589	0.0412969		-0.796941	0.0111916
ENSMUSG00000021057	Akap5	-1.11698	0.0330735		-0.692804	1.54271e-05
ENSMUSG00000021228	Acot3	-1.43609	0.039077		-0.962721	0.0159682
ENSMUSG00000020251	Glt8d2	-1.57955	0.0283014		-0.774372	0.000977181
ENSMUSG00000074968	Ano3	-1.74072	0.000695623		-1.29925	4.822e-18

## Sheet: P42 Ca vs P42 Cb
Gene ID	Gene name	P42_Ca			P42_Cb
		log2FC	padj		log2FC	padj
ENSMUSG00000019768	Esr1	3.44876	1.56753e-12		5.14486	2.0851e-93
ENSMUSG00000034990	Otoa	3.31359	0.000538446		2.67762	0.000309585
ENSMUSG00000110631	Gm42047	1.43066	0.000563732		1.63901	0.0120899
ENSMUSG00000004328	Hif3a	1.11987	0.0138282		1.02879	0.0493401
