# Supplementary material for: Molecular basis of neurodegeneration in a mouse model of Polr3-related disease
Source: eLife. 2024 Nov 5;13:RP95314. doi: 10.7554/eLife.95314 (PMC11537486; doi:10.7554/eLife.95314)
Supplement: Supplementary file 4. [file elife-95314-supp4.xlsx]

## Sheet: Legend Table S4
Supplementary File 4. RNAseq of WT and Polr3a-tamKI cerebella at P42. Tabs ordered from left to right contain (i) DESeq2 results for all genes and (ii) all DE genes with padj < 0.05.

## Sheet: DESeq2 P42_Cb
Gene ID	baseMean	log2FoldChange	lfcSE	stat	pvalue	padj	Gene Name
ENSMUSG00000019768	541.038	5.14486	0.245342	20.9701	1.22892e-97	2.0851e-93	Esr1
ENSMUSG00000034990	42.4614	2.67762	0.486217	5.50704	3.64926e-08	0.000309585	Otoa
ENSMUSG00000115529	81.8275	-1.46548	0.272902	-5.36999	7.87408e-08	0.000445332	9630013A20Rik
ENSMUSG00000024587	3863.77	0.464996	0.0953834	4.87502	1.08798e-06	0.0031238	Nars
ENSMUSG00000016918	434.178	-0.757546	0.153764	-4.92667	8.36425e-07	0.0031238	Sulf1
ENSMUSG00000027570	598.43	-1.05396	0.216328	-4.87201	1.10466e-06	0.0031238	Col9a3
ENSMUSG00000116946	41.6879	1.65947	0.358261	4.63201	3.62125e-06	0.00877739	AC130815.2
ENSMUSG00000110631	196.458	1.63901	0.362343	4.52337	6.08625e-06	0.0120899	Gm42047
ENSMUSG00000058626	50.0435	-2.5912	0.574253	-4.51229	6.41301e-06	0.0120899	Capn11
ENSMUSG00000020142	1018.31	0.487664	0.111594	4.36997	1.24265e-05	0.021084	Slc1a4
ENSMUSG00000090125	93.1397	-0.963749	0.227819	-4.23033	2.33348e-05	0.0359928	Pou3f1
ENSMUSG00000048538	27.3632	-1.62512	0.390746	-4.15901	3.19626e-05	0.0451925	Gm9826
ENSMUSG00000028804	846.181	-0.511036	0.123687	-4.13169	3.60106e-05	0.0456466	Csmd2
ENSMUSG00000036882	574.324	-0.562285	0.136432	-4.12136	3.76645e-05	0.0456466	Arhgap33
ENSMUSG00000004328	661.277	1.02879	0.253266	4.06208	4.86367e-05	0.0493401	Hif3a
ENSMUSG00000001627	599.068	0.607285	0.149155	4.0715	4.67109e-05	0.0493401	Ifrd1
ENSMUSG00000057615	129.078	-0.756837	0.186492	-4.05828	4.94361e-05	0.0493401	Ldoc1
ENSMUSG00000021848	261.936	-0.791988	0.196893	-4.02243	5.76006e-05	0.0514373	Otx2
ENSMUSG00000050822	1013.78	-0.432145	0.107206	-4.03097	5.55467e-05	0.0514373	Slc29a4
ENSMUSG00000029718	182.964	-0.89495	0.22479	-3.98128	6.85448e-05	0.05815	Pcolce
ENSMUSG00000032715	69.1975	2.27767	0.57974	3.92877	8.53814e-05	0.061547	Trib3
ENSMUSG00000031786	107.622	-1.50527	0.382315	-3.93725	8.24206e-05	0.061547	Drc7
ENSMUSG00000033965	424.431	-0.789737	0.199652	-3.95557	7.63527e-05	0.061547	Slc16a2
ENSMUSG00000028082	489.376	-0.485333	0.12368	-3.92409	8.70588e-05	0.061547	Sh3d19
ENSMUSG00000048450	104.715	-1.28275	0.329674	-3.89097	9.98463e-05	0.0651574	Msx1
ENSMUSG00000029777	2610.96	0.412999	0.105917	3.89927	9.64821e-05	0.0651574	Gars
ENSMUSG00000031026	855.967	0.463233	0.119389	3.88003	0.000104442	0.0656324	Trim66
ENSMUSG00000113200	12.8471	2.73669	0.70706	3.87052	0.000108603	0.0658094	Gm48632
ENSMUSG00000032122	77.0608	-1.03505	0.26855	-3.85422	0.000116097	0.0679248	Slc37a2
ENSMUSG00000048794	169.293	1.19468	0.312259	3.82592	0.000130284	0.0736846	Cfap100
ENSMUSG00000029752	1630.93	0.508196	0.135065	3.7626	0.000168157	0.0920364	Asns
ENSMUSG00000047230	124.538	-1.52955	0.410227	-3.72854	0.000192593	0.102117	Cldn2
ENSMUSG00000020150	218.733	-0.710067	0.191678	-3.70448	0.000211821	0.108908	Gamt
ENSMUSG00000030717	98.61	1.30023	0.352374	3.68991	0.000224337	0.111951	Nupr1
ENSMUSG00000034457	24.4207	2.09317	0.569941	3.6726	0.000240091	0.116389	Eda2r
ENSMUSG00000021256	670.416	-0.420448	0.114824	-3.66166	0.000250584	0.118102	Vash1
ENSMUSG00000028345	323.385	0.819418	0.224649	3.64755	0.000264757	0.121271	Tex10
ENSMUSG00000063229	1776.04	-0.499411	0.137164	-3.64098	0.000271604	0.121271	Ldha
ENSMUSG00000000392	29.2601	-1.42062	0.393968	-3.60592	0.000311052	0.131941	Fap
ENSMUSG00000035437	1799.6	0.568503	0.157548	3.60845	0.000308031	0.131941	Rabgap1
ENSMUSG00000023067	1454.27	1.2997	0.361404	3.59625	0.000322834	0.133598	Cdkn1a
ENSMUSG00000025350	187.597	-0.766587	0.213619	-3.58858	0.000332489	0.134317	Rdh5
ENSMUSG00000028125	249.665	-1.20173	0.335738	-3.57937	0.000344423	0.135903	Abca4
ENSMUSG00000043557	504.542	-0.577849	0.163717	-3.52956	0.000416245	0.156943	Mdga1
ENSMUSG00000062933	1161.34	-1.04895	0.297122	-3.53038	0.000414964	0.156943	Gm10123
ENSMUSG00000004655	123.392	-1.59733	0.45585	-3.50406	0.000458217	0.158665	Aqp1
ENSMUSG00000056174	145.599	-1.39087	0.396317	-3.50949	0.00044896	0.158665	Col8a2
ENSMUSG00000006464	653.25	-0.380824	0.108675	-3.50425	0.000457898	0.158665	Bbs1
ENSMUSG00000031770	1458.12	0.398566	0.113369	3.51566	0.000438661	0.158665	Herpud1
ENSMUSG00000004105	151.963	-0.592152	0.170151	-3.48015	0.000501133	0.16672	Angptl2
ENSMUSG00000071659	4313.14	-0.283869	0.0814568	-3.4849	0.000492318	0.16672	Hnrnpul2
ENSMUSG00000025784	72.9866	-0.918045	0.264975	-3.46465	0.000530913	0.169663	Clec3b
ENSMUSG00000005667	388.256	0.709408	0.205025	3.4601	0.000539978	0.169663	Mthfd2
ENSMUSG00000024287	1199.73	0.577436	0.166689	3.46415	0.000531903	0.169663	Thoc1
ENSMUSG00000074656	1080.4	0.405473	0.117474	3.4516	0.000557266	0.171911	Eif2s2
ENSMUSG00000105613	50.9509	2.05802	0.59941	3.43341	0.00059605	0.180592	Gm43684
ENSMUSG00000105974	25.3564	-1.63322	0.477889	-3.41758	0.000631801	0.184824	Gm43318
ENSMUSG00000106874	27.9205	1.21966	0.356696	3.41933	0.000627753	0.184824	Gm20186
ENSMUSG00000015652	35.1829	-1.63576	0.480866	-3.40169	0.000669718	0.192595	Steap1
ENSMUSG00000059901	34.0427	2.33683	0.689874	3.38734	0.000705747	0.196302	Adamts14
ENSMUSG00000048827	93.2295	0.877891	0.258858	3.3914	0.000695367	0.196302	Pkd1l3
ENSMUSG00000010080	549.422	-0.565072	0.167865	-3.36624	0.000762009	0.205222	Epn3
ENSMUSG00000048537	3652.77	-0.517494	0.153634	-3.36835	0.000756207	0.205222	Phldb1
ENSMUSG00000020457	905.071	0.309279	0.0929448	3.32756	0.000876102	0.232263	Drg1
ENSMUSG00000049382	19.5631	-1.87668	0.565584	-3.31813	0.000906224	0.234581	Krt8
ENSMUSG00000020326	1197.16	0.698381	0.210597	3.3162	0.000912498	0.234581	Ccng1
ENSMUSG00000111389	196.32	-1.03733	0.313737	-3.30639	0.000945079	0.239331	Gm39465
ENSMUSG00000031960	4354.98	0.457604	0.138587	3.30192	0.000960243	0.239595	Aars
ENSMUSG00000068428	40.425	-1.62003	0.491592	-3.29547	0.000982555	0.240091	Gmnc
ENSMUSG00000030711	352.267	0.912805	0.277848	3.28527	0.00101884	0.240091	Sult1a1
ENSMUSG00000032135	857.882	-0.434743	0.132156	-3.28962	0.00100323	0.240091	Mcam
ENSMUSG00000020611	1432.74	0.359698	0.109381	3.2885	0.00100723	0.240091	Gna13
ENSMUSG00000031398	814.046	-0.603357	0.184058	-3.27808	0.00104518	0.242925	Plxna3
ENSMUSG00000001604	15.975	-1.75326	0.53701	-3.26485	0.00109524	0.247772	Tcea3
ENSMUSG00000014158	139.071	-1.11166	0.340355	-3.26617	0.00109015	0.247772	Trpv4
ENSMUSG00000041313	1418.95	0.468931	0.143844	3.26	0.00111412	0.248726	Slc7a1
ENSMUSG00000037660	18.9692	-1.53115	0.470383	-3.25511	0.00113348	0.249764	Gdf7
ENSMUSG00000025537	364.103	-0.505067	0.156301	-3.23136	0.00123201	0.263551	Phkg1
ENSMUSG00000031239	513.996	-0.602498	0.186595	-3.22891	0.00124265	0.263551	Itm2a
ENSMUSG00000030605	772.936	-0.57027	0.176523	-3.23057	0.00123544	0.263551	Mfge8
ENSMUSG00000109460	60.3507	-1.18619	0.368857	-3.21587	0.00130052	0.272418	Gm45591
ENSMUSG00000034917	39.0791	-0.903166	0.281201	-3.21181	0.001319	0.27292	Tjp3
ENSMUSG00000032373	257.131	-1.36967	0.428183	-3.19879	0.00138005	0.282112	Car12
ENSMUSG00000034579	636.992	0.838292	0.264011	3.17521	0.00149726	0.30243	Pla2g3
ENSMUSG00000042688	2242.15	0.326377	0.103081	3.16622	0.00154433	0.308267	Mapk6
ENSMUSG00000101126	16.7186	-1.6362	0.517894	-3.15934	0.00158127	0.311969	Gm10538
ENSMUSG00000069919	158.758	-2.32122	0.742197	-3.1275	0.00176297	0.335112	Hba-a1
ENSMUSG00000059552	393.178	0.44752	0.143351	3.12184	0.00179722	0.335112	Trp53
ENSMUSG00000019997	378.558	1.25487	0.400979	3.12953	0.00175088	0.335112	Ctgf
ENSMUSG00000050538	1018.33	0.314928	0.100879	3.12183	0.00179732	0.335112	B230217C12Rik
ENSMUSG00000020184	1099.16	0.411162	0.131285	3.13183	0.00173719	0.335112	Mdm2
ENSMUSG00000003476	21.8908	-1.69389	0.544457	-3.11115	0.0018636	0.343692	Crhr2
ENSMUSG00000035805	2343.93	-0.304384	0.0981039	-3.10267	0.00191783	0.34989	Mlc1
ENSMUSG00000036169	97.347	-1.69921	0.548297	-3.09906	0.00194137	0.350417	Sostdc1
ENSMUSG00000050121	214.672	-1.29518	0.421787	-3.0707	0.00213554	0.377435	Opalin
ENSMUSG00000079003	350.151	-0.434495	0.141363	-3.07362	0.0021148	0.377435	Samd1
ENSMUSG00000091994	63.0282	0.933747	0.304899	3.06248	0.00219513	0.380049	E130317F20Rik
ENSMUSG00000030421	935.656	0.403914	0.131798	3.06465	0.00217926	0.380049	Uri1
ENSMUSG00000019874	319.955	-1.09312	0.358358	-3.05036	0.00228565	0.384308	Fabp7
ENSMUSG00000052397	482.638	-0.546985	0.179334	-3.0501	0.00228768	0.384308	Ezr
ENSMUSG00000039323	911.658	-1.1747	0.384648	-3.05396	0.00225839	0.384308	Igfbp2
ENSMUSG00000038508	40.0233	3.77059	1.23882	3.04369	0.00233694	0.388734	Gdf15
ENSMUSG00000036459	79.9287	-0.749167	0.247174	-3.03093	0.00243802	0.397749	Wtip
ENSMUSG00000041423	565.768	-0.470292	0.155058	-3.033	0.00242136	0.397749	Paqr6
ENSMUSG00000034684	250.355	-0.687912	0.228437	-3.01138	0.00260062	0.420235	Sema3f
ENSMUSG00000043020	20.4232	-1.19082	0.397191	-2.99809	0.00271674	0.434858	Wdr63
ENSMUSG00000043372	224.777	0.500856	0.167441	2.99124	0.00277846	0.44058	Hexim2
ENSMUSG00000068744	15.8597	1.89536	0.635956	2.98033	0.00287937	0.444541	Psrc1
ENSMUSG00000045912	57.1466	-0.835965	0.281042	-2.97452	0.00293444	0.444541	C2cd4c
ENSMUSG00000027313	201.098	1.11728	0.374951	2.97981	0.0028843	0.444541	Chac1
ENSMUSG00000044576	522.483	-0.400219	0.134431	-2.97712	0.00290966	0.444541	Garem2
ENSMUSG00000028811	2316.11	0.511242	0.171802	2.97576	0.00292263	0.444541	Yars
ENSMUSG00000082144	14.5359	1.39124	0.468446	2.96991	0.00297888	0.447227	Gm12788
ENSMUSG00000037295	606.358	-0.523878	0.176554	-2.96724	0.00300488	0.447227	Ldlrap1
ENSMUSG00000104388	17.569	-1.66179	0.561881	-2.95755	0.00310096	0.457513	Gm37033
ENSMUSG00000095403	72.2076	0.694318	0.235056	2.95384	0.00313847	0.459055	Gm21092
ENSMUSG00000097862	18.0814	-1.67087	0.569876	-2.93198	0.00336808	0.480728	Gm26859
ENSMUSG00000026822	47.1835	1.35789	0.462707	2.93467	0.00333908	0.480728	Lcn2
ENSMUSG00000042213	212.477	0.817465	0.279313	2.9267	0.0034258	0.480728	Zfand4
ENSMUSG00000028568	914.555	0.408672	0.139647	2.92647	0.00342831	0.480728	Btf3l4
ENSMUSG00000030313	1978.79	0.313138	0.106883	2.92974	0.00339251	0.480728	Dennd5b
ENSMUSG00000057457	54.7687	-0.98588	0.337751	-2.91896	0.00351206	0.484692	Phex
ENSMUSG00000078495	58.6956	0.945944	0.324086	2.91881	0.00351371	0.484692	Zfp984
ENSMUSG00000030087	760.157	0.550424	0.189138	2.91017	0.00361232	0.494276	Klf15
ENSMUSG00000024610	68.7724	-0.932622	0.321585	-2.90008	0.00373066	0.506385	Cd74
ENSMUSG00000041939	266.493	-0.397236	0.13747	-2.88963	0.00385699	0.519377	Mvk
ENSMUSG00000096929	1049.25	0.359118	0.124465	2.88529	0.00391049	0.522435	A330023F24Rik
ENSMUSG00000002409	553.77	-0.433722	0.150568	-2.88057	0.00396957	0.526185	Dyrk1b
ENSMUSG00000017493	275.113	-0.465183	0.161876	-2.8737	0.00405691	0.533593	Igfbp4
ENSMUSG00000098274	15.2508	1.39564	0.487503	2.86284	0.00419869	0.545167	Rpl24
ENSMUSG00000024993	600.687	0.289625	0.101195	2.86205	0.00420916	0.545167	Fam45a
ENSMUSG00000109216	31.3253	1.12513	0.394238	2.85394	0.0043181	0.555039	Gm44907
ENSMUSG00000090122	145.751	-0.672964	0.236639	-2.84384	0.00445736	0.568632	Kcne1l
ENSMUSG00000045672	496.574	-0.603804	0.212656	-2.83935	0.00452058	0.572393	Col27a1
ENSMUSG00000028211	583.844	0.574397	0.202506	2.83645	0.00456179	0.573332	Trp53inp1
ENSMUSG00000026051	227.907	-1.77921	0.630679	-2.8211	0.004786	0.59578	1500015O10Rik
ENSMUSG00000040010	2519.46	0.739143	0.262159	2.81945	0.00481062	0.59578	Slc7a5
ENSMUSG00000037851	1570.21	0.330346	0.117431	2.81312	0.0049064	0.603238	Iars
ENSMUSG00000071226	343.924	0.727656	0.259162	2.80773	0.00498923	0.609009	Cecr2
ENSMUSG00000057246	45.5795	0.849059	0.304177	2.79133	0.00524916	0.622814	BC051142
ENSMUSG00000028862	271.524	1.22048	0.43719	2.79166	0.00524388	0.622814	Map3k6
ENSMUSG00000030706	847.452	-0.257835	0.0921727	-2.7973	0.00515314	0.622814	Mrpl48
ENSMUSG00000054793	4019.84	-0.343187	0.122828	-2.79405	0.00520522	0.622814	Cadm4
ENSMUSG00000104369	29.6545	-1.35668	0.488189	-2.779	0.00545264	0.642465	Gm38082
ENSMUSG00000037355	444.336	0.420914	0.151629	2.77594	0.00550429	0.644078	Uvssa
ENSMUSG00000000884	48.0344	0.780695	0.281785	2.77054	0.00559639	0.65037	Gnb1l
ENSMUSG00000023175	7770.76	-0.281744	0.101811	-2.76733	0.00565176	0.652336	Bsg
ENSMUSG00000030641	15.99	1.30497	0.473338	2.75695	0.00583427	0.654507	Ddias
ENSMUSG00000106320	24.5608	-1.43481	0.520284	-2.75774	0.00582033	0.654507	Gm42992
ENSMUSG00000075602	319.581	0.472176	0.171213	2.75782	0.00581873	0.654507	Ly6a
ENSMUSG00000027882	701.684	0.859984	0.311384	2.76182	0.00574806	0.654507	Stxbp3
ENSMUSG00000035202	10645.6	-0.748618	0.271699	-2.75532	0.00586344	0.654507	Lars2
ENSMUSG00000097574	37.1037	0.833515	0.304326	2.73888	0.00616481	0.657708	C920006O11Rik
ENSMUSG00000037490	151.786	-0.899123	0.327922	-2.74188	0.00610886	0.657708	Slc2a12
ENSMUSG00000024937	207.804	-0.48501	0.177182	-2.73736	0.00619338	0.657708	Ehbp1l1
ENSMUSG00000066595	373.57	0.341812	0.124427	2.7471	0.00601255	0.657708	Flvcr1
ENSMUSG00000025889	459.889	-0.605445	0.220914	-2.74064	0.00613204	0.657708	Snca
ENSMUSG00000022949	638.412	-0.899236	0.328561	-2.73689	0.00620224	0.657708	Clic6
ENSMUSG00000005198	2731.02	0.490915	0.17932	2.73765	0.0061879	0.657708	Polr2a
ENSMUSG00000022463	2828.24	-0.440039	0.160516	-2.7414	0.00611782	0.657708	Srebf2
ENSMUSG00000017723	13.4701	-1.55483	0.569384	-2.73073	0.00631948	0.657808	Wfdc2
ENSMUSG00000066880	380.33	0.382246	0.13989	2.73248	0.00628586	0.657808	Zfp617
ENSMUSG00000015243	1469.14	0.524014	0.191825	2.73172	0.00630045	0.657808	Abca1
ENSMUSG00000029843	336.821	-0.744408	0.273507	-2.72171	0.0064945	0.667313	Slc13a4
ENSMUSG00000025591	360.385	1.07314	0.394829	2.71798	0.00656812	0.667313	Tma16
ENSMUSG00000021253	446.613	0.568027	0.208897	2.71917	0.00654455	0.667313	Tgfb3
ENSMUSG00000027634	8103.57	-0.365545	0.134233	-2.72322	0.00646487	0.667313	Ndrg3
ENSMUSG00000087589	24.4748	-1.04473	0.385903	-2.70723	0.00678464	0.685208	D430040D24Rik
ENSMUSG00000109125	16.4839	-1.62372	0.603969	-2.68842	0.00717901	0.706371	Gm45159
ENSMUSG00000104687	23.8362	-1.18838	0.441593	-2.69112	0.00712122	0.706371	Gm42899
ENSMUSG00000102964	27.6588	1.1258	0.418206	2.69198	0.00710302	0.706371	9430034N14Rik
ENSMUSG00000039521	34.4794	-0.902874	0.335973	-2.68734	0.00720235	0.706371	Foxp3
ENSMUSG00000107770	35.766	0.845569	0.314642	2.6874	0.00720097	0.706371	Gm44126
ENSMUSG00000040860	918.503	-0.390215	0.145434	-2.68311	0.00729417	0.711266	Crocc
ENSMUSG00000029410	30.3611	-0.997545	0.373308	-2.67218	0.0075361	0.718343	Ppef2
ENSMUSG00000074971	171.267	0.949415	0.355116	2.67354	0.00750562	0.718343	Fibin
ENSMUSG00000052229	677.714	-0.814161	0.304369	-2.67492	0.00747477	0.718343	Gpr17
ENSMUSG00000024222	819.859	1.05296	0.393576	2.67536	0.00746496	0.718343	Fkbp5
ENSMUSG00000030382	28.9437	1.57531	0.590697	2.66686	0.00765624	0.725718	Slc27a5
ENSMUSG00000031490	51.3275	1.43188	0.537565	2.66364	0.00772992	0.72863	Eif4ebp1
ENSMUSG00000097146	33.0694	0.88293	0.332429	2.656	0.00790742	0.741244	Gm4211
ENSMUSG00000030785	43.2913	1.26371	0.476151	2.65401	0.00795417	0.741529	Cox6a2
ENSMUSG00000007039	245.714	-0.690257	0.260547	-2.64926	0.0080669	0.744733	Ddah2
ENSMUSG00000021712	1133.24	0.36499	0.137791	2.64886	0.00807632	0.744733	Trim23
ENSMUSG00000020467	134.726	-0.47271	0.178711	-2.64511	0.00816633	0.748963	Efemp1
ENSMUSG00000026456	314.507	0.63712	0.241049	2.64311	0.00821482	0.74936	Cyb5r1
ENSMUSG00000092260	59.9216	0.723432	0.274203	2.63831	0.00833209	0.755993	Zfp963
ENSMUSG00000107451	96.486	0.891483	0.338565	2.63313	0.00846028	0.76354	Gm44421
ENSMUSG00000008496	230.121	-0.564044	0.214653	-2.6277	0.00859632	0.767651	Pou2f2
ENSMUSG00000025509	1162.87	1.00796	0.383416	2.62889	0.00856653	0.767651	Pnpla2
ENSMUSG00000014361	635.724	0.516272	0.196808	2.62322	0.0087103	0.773758	Mertk
ENSMUSG00000040138	115.309	-0.52789	0.201536	-2.61933	0.00881018	0.777923	Ndp
ENSMUSG00000072623	350.994	0.325781	0.124516	2.61639	0.00888661	0.777923	Zfp9
ENSMUSG00000006403	1058.08	-0.346173	0.132326	-2.61607	0.00889474	0.777923	Adamts4
ENSMUSG00000032327	108.058	-0.716411	0.274122	-2.61348	0.00896261	0.779839	Stra6
ENSMUSG00000049353	13.3871	-1.58906	0.624234	-2.54562	0.0109085	0.792728	Rd3
ENSMUSG00000114309	15.1819	1.23733	0.483327	2.56003	0.0104663	0.792728	Gm48295
ENSMUSG00000116568	19.5716	-1.4986	0.585136	-2.56112	0.0104337	0.792728	AC127341.2
ENSMUSG00000091415	19.1022	-1.17669	0.462385	-2.54484	0.0109329	0.792728	Ak9
ENSMUSG00000104973	18.2485	1.92889	0.746996	2.5822	0.00981736	0.792728	A530041M06Rik
ENSMUSG00000043024	20.3501	-1.55669	0.599319	-2.59744	0.00939218	0.792728	Gm16433
ENSMUSG00000105322	37.6085	-0.880105	0.344643	-2.55367	0.0106593	0.792728	Gm43751
ENSMUSG00000040552	34.6412	0.896862	0.34474	2.60156	0.00928007	0.792728	C3ar1
ENSMUSG00000078129	43.3099	-1.13959	0.440572	-2.58662	0.00969213	0.792728	Actl10
ENSMUSG00000110580	48.044	-0.766334	0.298028	-2.57134	0.0101305	0.792728	D830024N08Rik
ENSMUSG00000015966	50.5955	0.678962	0.264722	2.56482	0.010323	0.792728	Il17rb
ENSMUSG00000024246	69.3715	0.618391	0.242395	2.55117	0.0107361	0.792728	Thumpd2
ENSMUSG00000056069	86.3093	0.577018	0.226701	2.54528	0.010919	0.792728	Otulinl
ENSMUSG00000026220	111.27	0.692196	0.270774	2.55636	0.0105774	0.792728	Slc16a14
ENSMUSG00000026077	139.5	0.638076	0.250246	2.54979	0.0107786	0.792728	Npas2
ENSMUSG00000030602	152.74	-0.517021	0.20115	-2.57032	0.0101604	0.792728	Pak4
ENSMUSG00000035576	159.501	-0.69499	0.272622	-2.54928	0.0107946	0.792728	L3mbtl1
ENSMUSG00000037206	169.255	-0.778741	0.300395	-2.59239	0.00953106	0.792728	Islr
ENSMUSG00000056204	267.46	-0.391952	0.152614	-2.56826	0.0102211	0.792728	Pgpep1
ENSMUSG00000020892	287.364	0.708968	0.277496	2.55487	0.0106227	0.792728	Aloxe3
ENSMUSG00000022505	336.502	-0.563536	0.216364	-2.60457	0.00919887	0.792728	Emp2
ENSMUSG00000025408	424.325	0.789388	0.305251	2.58603	0.00970897	0.792728	Ddit3
ENSMUSG00000076281	488.766	-0.607192	0.236218	-2.57047	0.0101561	0.792728	Gm24270
ENSMUSG00000034255	493.565	0.441872	0.169785	2.60254	0.00925367	0.792728	Arhgap27
ENSMUSG00000022962	520.744	0.310089	0.120753	2.56795	0.0102302	0.792728	Gart
ENSMUSG00000028893	566.286	0.787319	0.305753	2.57502	0.0100234	0.792728	Sesn2
ENSMUSG00000036810	583.112	0.346119	0.135733	2.55001	0.0107721	0.792728	Cnep1r1
ENSMUSG00000031796	592.472	0.358672	0.14063	2.55046	0.0107581	0.792728	Cfap20
ENSMUSG00000097391	661.392	-0.287688	0.111527	-2.57955	0.00989294	0.792728	Mirg
ENSMUSG00000003273	930.401	-0.325569	0.127495	-2.55358	0.0106621	0.792728	Car11
ENSMUSG00000010755	1043.22	0.469432	0.183664	2.55594	0.0105903	0.792728	Cars
ENSMUSG00000032350	1242.67	0.312161	0.122042	2.55782	0.0105331	0.792728	Gclc
ENSMUSG00000048249	1510.99	0.412395	0.161063	2.56045	0.0104537	0.792728	Crebrf
ENSMUSG00000003534	1984.91	-0.331632	0.128785	-2.57507	0.010022	0.792728	Ddr1
ENSMUSG00000029361	2077.35	-0.39073	0.151337	-2.58185	0.00982724	0.792728	Nos1
ENSMUSG00000030738	3190.45	0.210167	0.0821673	2.5578	0.0105338	0.792728	Eif3c
ENSMUSG00000030057	3689.4	0.238762	0.0922131	2.58924	0.00961878	0.792728	Cnbp
ENSMUSG00000024359	3919.79	0.271583	0.105827	2.56629	0.0102793	0.792728	Hspa9
ENSMUSG00000017707	4469.69	0.357041	0.139876	2.55255	0.0106938	0.792728	Serinc3
ENSMUSG00000032494	45.8382	-0.963471	0.379548	-2.53847	0.0111338	0.800453	Tdgf1
ENSMUSG00000036864	80.9144	-0.557547	0.219608	-2.53882	0.0111226	0.800453	Proser3
ENSMUSG00000073940	18.5567	-2.07581	0.819212	-2.53391	0.0112798	0.804131	Hbb-bt
ENSMUSG00000043633	18.9173	1.04973	0.41449	2.53259	0.0113223	0.804131	Fam221b
ENSMUSG00000068739	3196.57	0.269209	0.106304	2.53244	0.0113271	0.804131	Sars
ENSMUSG00000032198	507.034	-0.472691	0.186863	-2.52962	0.0114187	0.807253	Dock6
ENSMUSG00000026628	36.5539	1.36075	0.541485	2.513	0.011971	0.827006	Atf3
ENSMUSG00000047407	41.5681	1.02689	0.408828	2.51178	0.0120123	0.827006	Tgif1
ENSMUSG00000109904	43.4586	-0.763809	0.303811	-2.5141	0.0119338	0.827006	Gm45819
ENSMUSG00000032246	48.2995	-1.11629	0.444008	-2.51411	0.0119332	0.827006	Calml4
ENSMUSG00000109362	58.2375	0.704117	0.279951	2.51514	0.0118985	0.827006	Gm44562
ENSMUSG00000000791	106.006	1.19925	0.477599	2.51099	0.0120393	0.827006	Il12rb1
ENSMUSG00000068196	133.038	-0.962374	0.382661	-2.51495	0.0119048	0.827006	Col8a1
ENSMUSG00000103085	24.3496	-0.934954	0.372983	-2.50669	0.0121866	0.833753	Gm38120
ENSMUSG00000079477	4166.11	0.212671	0.0850107	2.50169	0.01236	0.84222	Rab7
ENSMUSG00000063897	140.094	-0.589608	0.236079	-2.4975	0.0125071	0.848831	CAAA01118383.1
ENSMUSG00000106106	91437.4	-0.55774	0.224007	-2.48983	0.0127803	0.86392	CT010467.1
ENSMUSG00000052658	15.3452	1.41999	0.571591	2.48427	0.0129816	0.871287	5830454E08Rik
ENSMUSG00000021451	2122.67	-0.253467	0.10204	-2.48399	0.012992	0.871287	Sema4d
ENSMUSG00000069804	19.5285	-0.998798	0.402468	-2.48168	0.0130763	0.873487	Gm10277
ENSMUSG00000056153	366.685	0.390317	0.157489	2.47837	0.0131983	0.87818	Socs6
ENSMUSG00000041577	407.052	-0.380209	0.153601	-2.47531	0.0133122	0.882298	Prelp
ENSMUSG00000062101	66.1205	0.637592	0.257737	2.4738	0.0133683	0.882568	Zfp119b
ENSMUSG00000101335	44.9587	0.883165	0.357611	2.46963	0.0135255	0.884857	Gm28229
ENSMUSG00000029670	405.071	0.311	0.125885	2.47051	0.0134921	0.884857	Ing3
ENSMUSG00000022711	434.662	-0.30034	0.121658	-2.46873	0.0135594	0.884857	Pmm2
ENSMUSG00000114851	15.0772	1.56274	0.636418	2.45553	0.0140677	0.886409	Gm46409
ENSMUSG00000042828	23.1913	0.955696	0.388937	2.4572	0.0140024	0.886409	Trim72
ENSMUSG00000021815	39.5621	-0.944816	0.384305	-2.45851	0.0139516	0.886409	Mss51
ENSMUSG00000030882	125.406	-0.483165	0.196449	-2.4595	0.0139131	0.886409	Dnhd1
ENSMUSG00000074358	166.612	-0.469188	0.191253	-2.45323	0.0141579	0.886409	Ccdc61
ENSMUSG00000074227	378.009	-0.565807	0.230353	-2.45626	0.014039	0.886409	Spint2
ENSMUSG00000029730	375.632	0.466215	0.189545	2.45965	0.0139072	0.886409	Mcm7
ENSMUSG00000027342	564.743	0.297602	0.120814	2.46331	0.013766	0.886409	Pcna
ENSMUSG00000050017	822.674	0.282951	0.11502	2.46001	0.0138934	0.886409	Pitpnb
ENSMUSG00000034858	1659.17	0.445258	0.181461	2.45374	0.0141378	0.886409	Fam214a
ENSMUSG00000000787	6212.22	0.36688	0.149497	2.4541	0.0141238	0.886409	Ddx3x
ENSMUSG00000052305	218.525	-2.30625	0.941172	-2.45041	0.0142695	0.886851	Hbb-bs
ENSMUSG00000019232	1565.49	0.559929	0.228402	2.4515	0.0142261	0.886851	Etnppl
ENSMUSG00000022912	186.813	0.47661	0.194814	2.44649	0.0144256	0.893281	Pros1
ENSMUSG00000025270	27.6459	-1.23301	0.504638	-2.44335	0.0145515	0.893766	Alas2
ENSMUSG00000074252	76.3912	0.807199	0.330499	2.44236	0.0145914	0.893766	Gm10654
ENSMUSG00000039450	125.246	0.569109	0.233014	2.44239	0.0145905	0.893766	Dcxr
ENSMUSG00000107858	21.7935	-1.06806	0.439166	-2.43202	0.0150149	0.893988	Gm43879
ENSMUSG00000054383	23.1619	-0.873845	0.359529	-2.43053	0.015077	0.893988	Pnma1
ENSMUSG00000110558	24.0592	-1.12976	0.469303	-2.40731	0.0160704	0.893988	Gm45779
ENSMUSG00000105985	28.7957	-0.909192	0.373512	-2.43417	0.014926	0.893988	Gm42993
ENSMUSG00000070369	33.9354	1.51462	0.625098	2.42301	0.0153924	0.893988	Itgad
ENSMUSG00000031465	42.9861	0.863896	0.354944	2.43389	0.0149374	0.893988	Angpt2
ENSMUSG00000113425	50.0558	0.789399	0.326464	2.41802	0.0156051	0.893988	Gm48653
ENSMUSG00000045259	54.1689	0.751127	0.309643	2.42578	0.0152753	0.893988	Klhdc9
ENSMUSG00000051499	61.5693	0.65093	0.269437	2.41589	0.0156966	0.893988	Zfp786
ENSMUSG00000002289	62.5722	1.00498	0.41509	2.42112	0.0154727	0.893988	Angptl4
ENSMUSG00000002007	127.461	-0.607056	0.251711	-2.41172	0.0158775	0.893988	Srpk3
ENSMUSG00000034739	154.558	-1.15728	0.478522	-2.41845	0.0155867	0.893988	Mfrp
ENSMUSG00000060519	193.899	0.595456	0.246288	2.41772	0.0156181	0.893988	Tor3a
ENSMUSG00000071350	185.463	0.938994	0.38524	2.43743	0.0147921	0.893988	Setdb2
ENSMUSG00000089832	207.799	-0.419114	0.17293	-2.4236	0.0153673	0.893988	Shkbp1
ENSMUSG00000059897	220.598	0.456542	0.189098	2.41431	0.0157651	0.893988	Zfp930
ENSMUSG00000070420	244.674	0.365258	0.15138	2.41286	0.0158281	0.893988	Zscan25
ENSMUSG00000004098	300.247	0.737518	0.302523	2.43789	0.0147733	0.893988	Col5a3
ENSMUSG00000032968	398.167	-0.411435	0.170405	-2.41446	0.0157585	0.893988	Inha
ENSMUSG00000058291	600.565	0.277078	0.114999	2.4094	0.0159788	0.893988	Zfp68
ENSMUSG00000034818	655.986	-0.377482	0.155134	-2.43326	0.0149637	0.893988	Celf5
ENSMUSG00000001930	640.775	0.390611	0.162139	2.40911	0.0159913	0.893988	Vwf
ENSMUSG00000058488	928.548	-1.9147	0.791905	-2.41784	0.015613	0.893988	Kl
ENSMUSG00000028137	1036.82	-0.451668	0.187316	-2.41126	0.0158976	0.893988	Celf3
ENSMUSG00000010064	1433.32	-0.379847	0.157786	-2.40736	0.0160682	0.893988	Slc38a3
ENSMUSG00000034667	1654.77	0.264225	0.109674	2.40918	0.0159883	0.893988	Xpot
ENSMUSG00000022043	2495.43	0.246213	0.102059	2.41246	0.0158451	0.893988	Trim35
ENSMUSG00000022462	6321.82	0.454757	0.186438	2.43918	0.0147207	0.893988	Slc38a2
ENSMUSG00000034947	19.2546	1.03853	0.431815	2.40503	0.0161713	0.895692	Tmem106a
ENSMUSG00000037725	20.4983	1.23618	0.514204	2.40406	0.0162141	0.895692	Ckap2
ENSMUSG00000115625	34.5852	-1.77433	0.738368	-2.40304	0.0162594	0.895692	2900040C04Rik
ENSMUSG00000107002	514.569	-0.296333	0.123443	-2.40056	0.0163701	0.898873	0610012G03Rik
ENSMUSG00000073077	25.0704	-0.870898	0.363159	-2.39812	0.0164795	0.899061	Gm7173
ENSMUSG00000031400	956.193	0.285871	0.119155	2.39914	0.0164336	0.899061	G6pdx
ENSMUSG00000103443	14.8801	1.09878	0.458941	2.39416	0.0166586	0.900147	Gm37132
ENSMUSG00000103552	25.7004	-1.26189	0.526773	-2.39552	0.0165969	0.900147	Gm38217
ENSMUSG00000061353	923.18	-0.618696	0.258364	-2.39467	0.0166355	0.900147	Cxcl12
ENSMUSG00000005237	71.2337	-0.672014	0.28089	-2.39244	0.0167367	0.901498	Dnah2
ENSMUSG00000036875	79.797	0.517891	0.216938	2.38727	0.0169738	0.908502	Dna2
ENSMUSG00000045917	331.663	0.724096	0.303295	2.38743	0.0169665	0.908502	Tmem268
ENSMUSG00000086815	19.4732	-1.07013	0.449348	-2.38152	0.0172412	0.911314	3110082J24Rik
ENSMUSG00000033707	191.854	-0.363536	0.152581	-2.38257	0.0171924	0.911314	Lrrc24
ENSMUSG00000044986	349.642	-0.469676	0.196953	-2.38472	0.0170923	0.911314	Tst
ENSMUSG00000042548	1088.41	0.259405	0.108861	2.38289	0.0171773	0.911314	Asxl1
ENSMUSG00000025017	20.1679	-0.993175	0.418336	-2.37411	0.0175915	0.918386	Pik3ap1
ENSMUSG00000021072	798.269	0.280193	0.117925	2.37603	0.0175002	0.918386	Tmx1
ENSMUSG00000097971	1530.95	-0.839715	0.35356	-2.37503	0.0175476	0.918386	Gm26917
ENSMUSG00000039202	1694.86	-0.289144	0.121728	-2.37533	0.0175331	0.918386	Abhd2
ENSMUSG00000069917	25.6298	-1.94895	0.821731	-2.37176	0.0177036	0.920201	Hba-a2
ENSMUSG00000107868	28.694	0.935146	0.394747	2.36898	0.0178373	0.920201	Gm5112
ENSMUSG00000040877	104.856	-0.585175	0.247027	-2.36887	0.0178425	0.920201	Wdr25
ENSMUSG00000022948	193.585	0.456316	0.192632	2.36886	0.0178432	0.920201	Setd4
ENSMUSG00000091183	45.3695	0.728328	0.308151	2.36354	0.0181013	0.921375	Gm5141
ENSMUSG00000115471	55.6187	-0.765418	0.32339	-2.36686	0.01794	0.921375	C230086J09Rik
ENSMUSG00000107881	88.1337	-0.880197	0.372523	-2.3628	0.0181375	0.921375	Gm44250
ENSMUSG00000039239	220.563	-0.433262	0.18311	-2.36612	0.0179754	0.921375	Tgfb2
ENSMUSG00000022208	3580.13	-0.546554	0.231105	-2.36496	0.018032	0.921375	Jph4
ENSMUSG00000028339	100.653	-0.600654	0.254548	-2.35969	0.0182901	0.924997	Col15a1
ENSMUSG00000028173	656.548	-0.305778	0.129615	-2.35913	0.0183179	0.924997	Wls
ENSMUSG00000032590	661.175	-0.287107	0.121905	-2.35517	0.0185141	0.929374	Apeh
ENSMUSG00000057421	1086.52	0.347029	0.147285	2.35617	0.0184645	0.929374	Las1l
ENSMUSG00000028782	2861.3	-0.392729	0.166843	-2.35388	0.0185786	0.929863	Adgrb2
ENSMUSG00000111447	26.3685	0.859152	0.365504	2.35059	0.0187435	0.929886	Gm48249
ENSMUSG00000056260	313.894	0.395991	0.168463	2.35061	0.0187424	0.929886	Lrif1
ENSMUSG00000029397	532.829	0.27846	0.118418	2.35149	0.0186982	0.929886	Rchy1
ENSMUSG00000006574	18.0611	-1.39848	0.597051	-2.34231	0.0191648	0.93459	Slc4a1
ENSMUSG00000010044	28.6552	-0.906849	0.386715	-2.34501	0.0190266	0.93459	Zmynd10
ENSMUSG00000042672	77.9764	0.636788	0.27133	2.34691	0.0189296	0.93459	Dcst1
ENSMUSG00000029826	170.565	0.406206	0.173506	2.34116	0.0192239	0.93459	Zc3hav1
ENSMUSG00000021186	291.378	0.586821	0.250144	2.34593	0.0189795	0.93459	Fbln5
ENSMUSG00000059326	395.526	-0.557595	0.238123	-2.34163	0.0191996	0.93459	Csf2ra
ENSMUSG00000024816	575.69	-0.415141	0.177145	-2.34351	0.0191032	0.93459	Frmd8
ENSMUSG00000026674	272.913	0.604792	0.258453	2.34005	0.0192811	0.934692	Ddr2
ENSMUSG00000036256	404.695	-0.267545	0.114543	-2.33575	0.0195043	0.942821	Igfbp7
ENSMUSG00000056459	250.203	0.371178	0.159026	2.33407	0.0195918	0.944359	Zbtb25
ENSMUSG00000009535	1634.21	0.286429	0.122922	2.33018	0.0197969	0.95154	Rnmt
ENSMUSG00000085244	53.5615	1.04184	0.447813	2.32651	0.0199914	0.958173	Spag17os
ENSMUSG00000026686	36.079	-0.697315	0.300457	-2.32085	0.0202951	0.96999	Lmx1a
ENSMUSG00000009356	80.4424	-0.752856	0.324788	-2.31799	0.0204499	0.970913	Lpo
ENSMUSG00000002416	462.854	-0.397203	0.171317	-2.31853	0.0204207	0.970913	Ndufb2
ENSMUSG00000021792	2169.71	0.244926	0.105693	2.31732	0.0204861	0.970913	Fam213a
ENSMUSG00000020571	927.62	-0.315124	0.136072	-2.31587	0.0205652	0.971949	Pdia6
ENSMUSG00000054679	257.428	0.361886	0.156377	2.31419	0.0206571	0.973578	Srsf12
ENSMUSG00000023120	13.7377	-1.57927	0.690035	-2.28868	0.0220981	0.979146	Gm853
ENSMUSG00000103291	14.627	-1.12003	0.485444	-2.30722	0.0210426	0.979146	Gm38235
ENSMUSG00000102827	13.8609	1.21614	0.53213	2.28543	0.0222877	0.979146	Gm8242
ENSMUSG00000103563	17.9055	-1.35718	0.587897	-2.30854	0.020969	0.979146	8030445P17Rik
ENSMUSG00000046415	20.3069	0.962271	0.419546	2.2936	0.0218135	0.979146	B430212C06Rik
ENSMUSG00000075555	25.4689	-1.45376	0.634749	-2.2903	0.0220042	0.979146	Gm10863
ENSMUSG00000097825	30.5723	1.01205	0.439306	2.30374	0.0212373	0.979146	9630001P10Rik
ENSMUSG00000080727	49.4121	0.634727	0.277488	2.2874	0.0221725	0.979146	C920021L13Rik
ENSMUSG00000079414	55.8773	0.684472	0.29888	2.29012	0.0220142	0.979146	Gm11110
ENSMUSG00000030889	76.1104	-0.765682	0.333176	-2.29813	0.0215543	0.979146	Vwa3a
ENSMUSG00000059498	74.2319	0.585293	0.256185	2.28465	0.0223333	0.979146	Fcgr3
ENSMUSG00000039110	80.2862	-0.547432	0.236896	-2.31085	0.020841	0.979146	Mycbpap
ENSMUSG00000027524	90.2559	-0.47182	0.204934	-2.3023	0.0213181	0.979146	Edn3
ENSMUSG00000055723	107.834	-0.491913	0.213895	-2.29978	0.0214607	0.979146	Rras2
ENSMUSG00000018566	102.601	0.605377	0.264525	2.28854	0.0221059	0.979146	Slc2a4
ENSMUSG00000036461	175.852	0.407696	0.17837	2.28568	0.022273	0.979146	Elf1
ENSMUSG00000038079	258.174	-0.394311	0.171891	-2.29395	0.0217931	0.979146	Tmem237
ENSMUSG00000027999	285.889	0.374453	0.16237	2.30618	0.0211008	0.979146	Pla2g12a
ENSMUSG00000031168	322.326	-0.446253	0.194159	-2.29838	0.02154	0.979146	Ebp
ENSMUSG00000043079	331.273	-0.400016	0.174109	-2.29751	0.0215898	0.979146	Synpo
ENSMUSG00000018459	409.207	-0.346132	0.149958	-2.30819	0.0209888	0.979146	Slc13a3
ENSMUSG00000031970	456.89	-0.366468	0.158996	-2.30488	0.021173	0.979146	Dbndd1
ENSMUSG00000071253	519.739	0.351293	0.153609	2.28692	0.0222002	0.979146	Slc25a16
ENSMUSG00000043448	597.272	-0.733888	0.32109	-2.28562	0.0222767	0.979146	Gjc2
ENSMUSG00000047789	685.654	0.262399	0.11414	2.29892	0.0215094	0.979146	Slc38a9
ENSMUSG00000031666	986.008	0.321114	0.140184	2.29065	0.0219836	0.979146	Rbl2
ENSMUSG00000058135	2981.32	0.337574	0.146834	2.29903	0.0215035	0.979146	Gstm1
ENSMUSG00000044468	40.0527	-0.858654	0.376398	-2.28124	0.022534	0.980455	Tent5c
ENSMUSG00000006014	139.364	0.90013	0.394795	2.27999	0.0226082	0.980455	Prg4
ENSMUSG00000030600	729.824	-0.280892	0.123239	-2.27925	0.0226521	0.980455	Lrfn1
ENSMUSG00000034949	1137.97	-0.300447	0.131707	-2.28118	0.0225378	0.980455	Zfr2
ENSMUSG00000003814	3940.36	-0.345529	0.151538	-2.28015	0.0225986	0.980455	Calr
ENSMUSG00000098132	19.6172	-1.00203	0.44024	-2.27609	0.0228404	0.980812	Rassf10
ENSMUSG00000033508	27.3145	1.30195	0.571838	2.27678	0.0227991	0.980812	Asprv1
ENSMUSG00000028111	60.4666	-0.650287	0.287113	-2.26492	0.0235178	0.980812	Ctsk
ENSMUSG00000052407	60.5508	0.539089	0.237964	2.26542	0.0234867	0.980812	Ccdc171
ENSMUSG00000097258	83.751	0.653427	0.288519	2.26476	0.0235275	0.980812	Gm26767
ENSMUSG00000092203	93.5963	0.486689	0.214688	2.26697	0.0233923	0.980812	1110038B12Rik
ENSMUSG00000046567	226.464	0.367808	0.162057	2.26962	0.0232307	0.980812	4930430F08Rik
ENSMUSG00000018449	242.013	0.297107	0.13069	2.27337	0.0230041	0.980812	Rpain
ENSMUSG00000028919	411.737	-0.387253	0.170202	-2.27525	0.0228909	0.980812	Arhgef19
ENSMUSG00000042354	486.425	0.282488	0.12431	2.27244	0.0230597	0.980812	Gnl3
ENSMUSG00000029661	615.487	-0.390576	0.171753	-2.27406	0.0229623	0.980812	Col1a2
ENSMUSG00000024493	818.802	0.422017	0.186093	2.26777	0.023343	0.980812	Lars
ENSMUSG00000059824	868.514	-0.508085	0.223709	-2.27118	0.0231359	0.980812	Dbp
ENSMUSG00000079184	873.604	0.244019	0.107647	2.26684	0.0234002	0.980812	Mphosph8
ENSMUSG00000025375	7743.98	-0.274871	0.121119	-2.26942	0.0232426	0.980812	Aatk
ENSMUSG00000102424	14.4749	-1.00537	0.447014	-2.24908	0.0245074	0.98421	Paupar
ENSMUSG00000108455	15.4554	-0.973981	0.434023	-2.24408	0.0248274	0.98421	Gm44745
ENSMUSG00000111474	15.4497	0.986499	0.441055	2.23668	0.0253073	0.98421	Gm32926
ENSMUSG00000023968	17.817	-0.893372	0.396524	-2.25301	0.0242588	0.98421	Crip3
ENSMUSG00000028294	23.2582	-0.959005	0.424738	-2.25787	0.0239535	0.98421	Cfap206
ENSMUSG00000041605	25.5046	-0.77462	0.346087	-2.23823	0.0252063	0.98421	Inava
ENSMUSG00000053914	26.3685	1.1274	0.499864	2.25542	0.0241069	0.98421	Kdm4d
ENSMUSG00000079242	31.0813	0.806472	0.359312	2.24449	0.0248007	0.98421	C730034F03Rik
ENSMUSG00000020475	42.8942	0.697201	0.311885	2.23544	0.0253883	0.98421	Pgam2
ENSMUSG00000043895	51.936	-0.54238	0.239947	-2.26042	0.0237952	0.98421	S1pr2
ENSMUSG00000043924	51.4675	0.808517	0.361872	2.23426	0.0254661	0.98421	Ncmap
ENSMUSG00000028011	64.3025	0.90797	0.404566	2.2443	0.0248129	0.98421	Tdo2
ENSMUSG00000029727	69.1065	1.02641	0.458438	2.23893	0.0251604	0.98421	Cyp3a13
ENSMUSG00000032528	80.5166	-0.635337	0.282105	-2.25213	0.0243141	0.98421	Vipr1
ENSMUSG00000056832	104.654	0.456924	0.204024	2.23956	0.0251192	0.98421	Ttc26
ENSMUSG00000036246	146.871	-0.388946	0.172566	-2.25389	0.024203	0.98421	Gmip
ENSMUSG00000020491	179.558	0.353768	0.15726	2.24958	0.0244758	0.98421	2810021J22Rik
ENSMUSG00000034687	183.131	-0.451259	0.201814	-2.23601	0.0253511	0.98421	Fras1
ENSMUSG00000022203	203.316	-0.550965	0.243588	-2.26187	0.0237053	0.98421	Efs
ENSMUSG00000020695	219.157	-0.570734	0.254198	-2.24524	0.024753	0.98421	Mrc2
ENSMUSG00000071073	227.835	-0.402392	0.17814	-2.25885	0.0238925	0.98421	Lrrc73
ENSMUSG00000025036	295.95	0.458519	0.2037	2.25095	0.0243886	0.98421	Sfxn2
ENSMUSG00000072941	368.25	-0.351765	0.157414	-2.23465	0.0254403	0.98421	Sod3
ENSMUSG00000029781	472.303	-0.308147	0.136554	-2.25659	0.0240337	0.98421	Fkbp9
ENSMUSG00000041747	512.426	0.255258	0.114057	2.23799	0.0252217	0.98421	Utp15
ENSMUSG00000003617	538.498	0.541514	0.240156	2.25484	0.0241435	0.98421	Cp
ENSMUSG00000047141	617.203	0.377774	0.168572	2.24103	0.0250242	0.98421	Zfp654
ENSMUSG00000016257	620.369	0.303418	0.135672	2.23641	0.0253252	0.98421	Prelid3b
ENSMUSG00000045193	1318.34	0.525806	0.232614	2.26042	0.023795	0.98421	Cirbp
ENSMUSG00000040354	1397.79	0.61656	0.276065	2.23339	0.0255232	0.98421	Mars
ENSMUSG00000078652	1573.25	0.252295	0.112435	2.24393	0.0248369	0.98421	Psme3
ENSMUSG00000035597	1750.92	0.466891	0.208567	2.23856	0.0251844	0.98421	Prpf39
ENSMUSG00000031765	7500.37	0.491304	0.219952	2.23369	0.0255036	0.98421	Mt1
ENSMUSG00000032484	13.4212	-1.62831	0.731165	-2.22701	0.0259465	0.996006	Ngp
ENSMUSG00000021760	78.6492	-0.734674	0.329769	-2.22784	0.025891	0.996006	Gpx8
ENSMUSG00000027420	12.9121	1.10186	0.497032	2.21687	0.0266318	0.997645	Bfsp1
ENSMUSG00000078881	14.5964	2.24309	1.01376	2.21264	0.0269227	0.997645	Gm14434
ENSMUSG00000091423	15.5528	1.16697	0.525584	2.22032	0.026397	0.997645	Gm17509
ENSMUSG00000028730	20.5335	-1.08588	0.489667	-2.21759	0.0265831	0.997645	Cfap57
ENSMUSG00000057836	25.7493	-1.32072	0.594944	-2.2199	0.0264252	0.997645	Xlr3a
ENSMUSG00000070306	37.4857	-0.886473	0.399609	-2.21835	0.0265309	0.997645	Ccdc153
ENSMUSG00000029490	34.8379	0.930475	0.41875	2.22203	0.0262812	0.997645	Mfsd7a
ENSMUSG00000005718	129.46	0.692219	0.312926	2.21209	0.0269605	0.997645	Tfap4
ENSMUSG00000074340	162.061	0.504989	0.227925	2.21559	0.0267194	0.997645	Ovgp1
ENSMUSG00000026694	272.504	0.309978	0.139513	2.22186	0.0262928	0.997645	Mettl13
ENSMUSG00000062931	319.832	0.359981	0.162393	2.21673	0.0266417	0.997645	Zfp938
ENSMUSG00000042579	342.289	0.291021	0.131169	2.21866	0.0265096	0.997645	4632404H12Rik
ENSMUSG00000029388	350.847	0.311435	0.140814	2.21168	0.0269888	0.997645	Eif2b1
ENSMUSG00000021501	492.79	0.341635	0.153805	2.22122	0.0263359	0.997645	Caml
ENSMUSG00000090071	1881.31	-0.345892	0.156353	-2.21225	0.0269495	0.997645	Cdk5r2
ENSMUSG00000024640	2238.76	0.396988	0.178663	2.22199	0.026284	0.997645	Psat1
ENSMUSG00000010095	2588.04	0.451964	0.204227	2.21305	0.0268944	0.997645	Slc3a2
ENSMUSG00000024598	31.9647	-0.966665	0.437536	-2.20934	0.027151	0.999512	Fbn2
ENSMUSG00000072875	220.715	-0.365074	0.165248	-2.20925	0.0271571	0.999512	Gpr27
ENSMUSG00000085134	12.5572	-0.936075	0.718472	-1.30287	0.19262	0.999853	Gm11659
ENSMUSG00000111929	12.4726	-1.09391	0.693884	-1.5765	0.11491	0.999853	Gm48780
ENSMUSG00000082305	12.4031	-0.891796	0.600892	-1.48412	0.137777	0.999853	Gm2420
ENSMUSG00000115568	12.4984	-1.03429	0.761194	-1.35878	0.174217	0.999853	Tiaf2
ENSMUSG00000083104	12.4755	-1.14207	0.64503	-1.77057	0.0766321	0.999853	Gm12917
ENSMUSG00000105332	12.4375	-0.855181	0.657996	-1.29968	0.193712	0.999853	Gm43316
ENSMUSG00000114924	12.505	-0.856589	0.625426	-1.36961	0.170809	0.999853	Gm38408
ENSMUSG00000054999	12.4672	-0.480497	0.536201	-0.896114	0.370192	0.999853	Naaladl1
ENSMUSG00000102747	12.7419	-0.469282	0.751505	-0.624457	0.532327	0.999853	Gm37602
ENSMUSG00000107835	12.4967	-0.247152	0.636842	-0.38809	0.69795	0.999853	Gm43999
ENSMUSG00000105561	12.7281	-0.492363	0.642461	-0.766369	0.443457	0.999853	Gm43462
ENSMUSG00000111229	12.6196	-0.948218	0.502806	-1.88585	0.0593149	0.999853	Gm39323
ENSMUSG00000113387	12.4225	-0.580376	0.494301	-1.17414	0.240341	0.999853	Gm31508
ENSMUSG00000103209	12.8623	-0.24831	0.647268	-0.383627	0.701255	0.999853	Gm37331
ENSMUSG00000094891	12.748	-0.67424	0.568656	-1.18567	0.235751	0.999853	Olfr55
ENSMUSG00000106491	13.104	-0.619291	0.703485	-0.880319	0.378687	0.999853	Gm42446
ENSMUSG00000099906	12.5063	-0.536362	0.653343	-0.82095	0.411675	0.999853	Gm28653
ENSMUSG00000031789	12.9117	-1.05498	0.653775	-1.61367	0.106599	0.999853	Cngb1
ENSMUSG00000102912	12.7261	-0.402977	0.632438	-0.63718	0.524007	0.999853	Gm20731
ENSMUSG00000054304	12.5981	-0.171788	0.544993	-0.315211	0.752601	0.999853	D130007C19Rik
ENSMUSG00000104897	12.4367	-0.181499	0.517973	-0.350402	0.726037	0.999853	Gm43203
ENSMUSG00000111003	12.9353	-0.961565	0.705112	-1.3637	0.172661	0.999853	Gm47122
ENSMUSG00000021799	12.4436	-0.469494	0.705406	-0.665566	0.505688	0.999853	Opn4
ENSMUSG00000030336	12.4679	-0.266149	0.522451	-0.509423	0.610456	0.999853	Cd27
ENSMUSG00000074354	12.7212	-0.452509	0.537205	-0.84234	0.399598	0.999853	Arhgap20os
ENSMUSG00000113965	12.4505	0.453648	0.657575	0.689879	0.49027	0.999853	A730091E23Rik
ENSMUSG00000111246	12.7378	-0.2565	0.573663	-0.447127	0.654784	0.999853	4930517E14Rik
ENSMUSG00000105977	12.4684	-0.504901	0.506188	-0.997458	0.318542	0.999853	Gm43555
ENSMUSG00000056738	12.4103	-0.613954	0.696477	-0.881513	0.37804	0.999853	A730036I17Rik
ENSMUSG00000102423	12.9789	-0.721892	0.546859	-1.32007	0.186812	0.999853	Gm37465
ENSMUSG00000116004	12.5429	0.734135	0.664749	1.10438	0.269429	0.999853	Gm49539
ENSMUSG00000041165	13.3052	-0.918734	0.740971	-1.2399	0.215011	0.999853	Spem1
ENSMUSG00000116760	12.4591	-1.06831	0.685804	-1.55774	0.119295	0.999853	AC164314.1
ENSMUSG00000086441	12.4414	-0.156726	0.629737	-0.248876	0.803457	0.999853	Gm15046
ENSMUSG00000114796	12.5558	0.110642	0.557062	0.198617	0.842562	0.999853	A930028N01Rik
ENSMUSG00000056054	12.7393	-1.02147	0.665074	-1.53588	0.124568	0.999853	S100a8
ENSMUSG00000053916	12.6426	0.211981	0.930324	0.227857	0.819757	0.999853	Nanp
ENSMUSG00000095730	12.5589	-0.0903101	0.591998	-0.152551	0.878752	0.999853	Vmn2r29
ENSMUSG00000097471	12.7791	-0.408727	0.595143	-0.686771	0.492227	0.999853	5830432E09Rik
ENSMUSG00000021414	12.4035	-0.245233	0.493142	-0.497286	0.618987	0.999853	Fam217a
ENSMUSG00000104324	12.7009	-0.370836	0.751014	-0.493779	0.621462	0.999853	Gm37320
ENSMUSG00000104114	12.7639	-1.07204	0.524453	-2.0441	0.0409432	0.999853	Gm37297
ENSMUSG00000109652	12.473	0.190599	0.672151	0.283566	0.776743	0.999853	Gm45555
ENSMUSG00000095040	12.4978	0.819807	0.610608	1.34261	0.179399	0.999853	1700001J03Rik
ENSMUSG00000028873	12.6072	-0.222165	0.531784	-0.417773	0.676113	0.999853	Cdca8
ENSMUSG00000086714	12.8638	-0.466979	0.582384	-0.80184	0.422645	0.999853	0610009E02Rik
ENSMUSG00000097360	12.5664	0.247666	0.667374	0.371105	0.710559	0.999853	9430065F17Rik
ENSMUSG00000054514	12.5128	-0.159324	0.5059	-0.314931	0.752814	0.999853	Atad3aos
ENSMUSG00000056329	12.727	0.115408	0.535738	0.215418	0.829441	0.999853	1810010K12Rik
ENSMUSG00000085875	12.4143	0.185188	0.600636	0.30832	0.757839	0.999853	Gm12905
ENSMUSG00000060727	12.7583	-0.21232	0.482004	-0.440494	0.659579	0.999853	Gm12571
ENSMUSG00000097399	12.6833	0.127819	0.559868	0.228302	0.819412	0.999853	Gm26555
ENSMUSG00000096924	12.8503	-0.141367	0.51511	-0.274441	0.783746	0.999853	Gm26824
ENSMUSG00000077925	12.7557	-0.783884	0.509891	-1.53736	0.124206	0.999853	Mir453
ENSMUSG00000092371	13.0597	0.0716332	0.583744	0.122713	0.902334	0.999853	Gm20511
ENSMUSG00000066108	13.2784	1.1591	0.816737	1.41918	0.155847	0.999853	Muc5b
ENSMUSG00000020871	13.3388	-0.506884	0.633251	-0.800447	0.423452	0.999853	Dlx4
ENSMUSG00000042333	12.5102	-0.0133467	0.54764	-0.0243713	0.980556	0.999853	Tnfrsf14
ENSMUSG00000031004	12.9742	-0.960728	0.601815	-1.59638	0.110403	0.999853	Mki67
ENSMUSG00000031027	12.4438	-0.419208	0.834537	-0.502324	0.61544	0.999853	Stk33
ENSMUSG00000058159	12.5722	-0.424052	0.493095	-0.859981	0.3898	0.999853	T2
ENSMUSG00000104164	13.2104	0.079408	0.659345	0.120435	0.904139	0.999853	Gm38248
ENSMUSG00000102856	13.1058	-0.792102	0.539111	-1.46927	0.141758	0.999853	Gm37084
ENSMUSG00000097167	12.4541	0.103259	0.530056	0.194807	0.845544	0.999853	Gm16740
ENSMUSG00000084859	12.5515	-0.214298	0.63963	-0.335033	0.7376	0.999853	1700080N15Rik
ENSMUSG00000001493	12.4319	0.0931135	0.561881	0.165718	0.868379	0.999853	Meox1
ENSMUSG00000085917	12.403	0.326888	0.461307	0.708614	0.478564	0.999853	Gm15899
ENSMUSG00000104094	13.1116	0.562099	0.717782	0.783107	0.433565	0.999853	Gm37314
ENSMUSG00000110863	13.1786	-0.314283	0.669364	-0.469525	0.638694	0.999853	Gm34655
ENSMUSG00000116927	12.5121	0.509534	0.574335	0.887173	0.374986	0.999853	AC168220.3
ENSMUSG00000114524	12.6094	0.0648612	0.479257	0.135337	0.892345	0.999853	Gm48357
ENSMUSG00000013766	13.208	-0.261054	0.739345	-0.353089	0.724022	0.999853	Ly6g6e
ENSMUSG00000081605	12.4608	0.348359	0.49066	0.70998	0.477717	0.999853	Gm15953
ENSMUSG00000097021	12.4247	0.159364	0.541138	0.294498	0.768377	0.999853	4933433G15Rik
ENSMUSG00000103945	12.5989	-0.174024	0.705293	-0.24674	0.805109	0.999853	Gm38228
ENSMUSG00000105571	13.3262	-0.0061683	0.733726	-0.00840682	0.993292	0.999853	Gm43662
ENSMUSG00000082057	12.5301	0.265953	0.56935	0.467118	0.640416	0.999853	Gm15789
ENSMUSG00000024903	12.4747	0.481626	0.537095	0.896723	0.369867	0.999853	Lao1
ENSMUSG00000085434	13.3454	-0.688717	0.586916	-1.17345	0.240615	0.999853	Gm11725
ENSMUSG00000089760	13.3644	-0.224643	0.68587	-0.327529	0.743267	0.999853	D030046N08Rik
ENSMUSG00000106579	13.4804	-0.8359	0.800824	-1.0438	0.296578	0.999853	Gm42771
ENSMUSG00000097591	13.059	0.51923	0.861795	0.602499	0.546842	0.999853	A330032B11Rik
ENSMUSG00000092323	12.8627	0.317107	0.516374	0.614104	0.539147	0.999853	BB365896
ENSMUSG00000106657	13.5337	-0.998853	0.585558	-1.70581	0.0880428	0.999853	Gm47303
ENSMUSG00000104968	12.8785	-0.183203	0.649603	-0.282023	0.777926	0.999853	Gm43803
ENSMUSG00000074052	13.0092	0.748275	0.733834	1.01968	0.307881	0.999853	BC048644
ENSMUSG00000042759	12.7153	0.81024	0.549835	1.47361	0.140588	0.999853	Apobr
ENSMUSG00000085235	12.5192	-0.396352	0.601552	-0.658883	0.509971	0.999853	Gm12576
ENSMUSG00000085517	12.9616	-0.382088	0.46304	-0.825174	0.409273	0.999853	Gm12963
ENSMUSG00000044145	12.4701	-0.332478	0.568935	-0.584387	0.55896	0.999853	1810024B03Rik
ENSMUSG00000113170	12.4289	-0.176103	0.49789	-0.353699	0.723564	0.999853	Gm36839
ENSMUSG00000092384	12.7413	-0.127087	0.529614	-0.239961	0.81036	0.999853	Gm4189
ENSMUSG00000103630	12.9208	-0.502342	0.469159	-1.07073	0.284291	0.999853	Gm37242
ENSMUSG00000039187	12.7223	-0.467254	0.501238	-0.932199	0.351234	0.999853	Fanci
ENSMUSG00000099267	12.8963	-0.17861	0.537047	-0.332578	0.739453	0.999853	Mir6955
ENSMUSG00000006642	12.534	-0.0805395	0.527206	-0.152767	0.878582	0.999853	Tcf23
ENSMUSG00000034212	12.5343	0.336151	0.496246	0.677388	0.49816	0.999853	Ankmy1
ENSMUSG00000117069	12.8471	-0.0290062	0.512938	-0.0565491	0.954904	0.999853	AC122487.1
ENSMUSG00000084274	12.4149	0.527178	0.484173	1.08882	0.276232	0.999853	Gm12504
ENSMUSG00000103926	12.8925	0.408232	0.693089	0.589004	0.555858	0.999853	Gm37894
ENSMUSG00000112201	13.1626	-0.980992	0.496895	-1.97424	0.048354	0.999853	4930532I03Rik
ENSMUSG00000087047	13.4884	-0.273752	0.723541	-0.378351	0.70517	0.999853	1700110K17Rik
ENSMUSG00000078491	12.9781	-0.475381	0.59634	-0.797164	0.425356	0.999853	Gm13090
ENSMUSG00000107148	13.8034	-0.381998	0.858098	-0.445169	0.656198	0.999853	Gm42888
ENSMUSG00000036687	12.9272	-0.908636	0.523379	-1.7361	0.0825469	0.999853	Tmem184a
ENSMUSG00000104033	12.7479	-0.16313	0.488959	-0.333627	0.738661	0.999853	Gm37773
ENSMUSG00000050122	13.0457	-0.458519	0.591058	-0.775761	0.43789	0.999853	Vwa3b
ENSMUSG00000089726	12.4889	0.818605	0.487989	1.67751	0.0934435	0.999853	Mir17hg
ENSMUSG00000041479	12.7473	-0.228345	0.478127	-0.477582	0.632948	0.999853	Syt15
ENSMUSG00000104621	13.2699	0.149623	0.542799	0.275651	0.782816	0.999853	Gm43185
ENSMUSG00000113070	12.8622	-0.128866	0.476242	-0.27059	0.786706	0.999853	Gm48420
ENSMUSG00000116590	13.2447	-0.524923	0.455732	-1.15183	0.249393	0.999853	AC154200.1
ENSMUSG00000098661	13.3426	-0.457484	0.495005	-0.9242	0.355382	0.999853	Mir7052
ENSMUSG00000063754	12.7626	0.661141	0.619469	1.06727	0.285849	0.999853	Gm10136
ENSMUSG00000060890	12.9315	0.149278	0.550573	0.271131	0.78629	0.999853	Arr3
ENSMUSG00000103620	12.5358	0.68434	0.633946	1.07949	0.280368	0.999853	Gm37359
ENSMUSG00000045048	13.2877	-0.192144	0.524071	-0.366637	0.71389	0.999853	Gm9795
ENSMUSG00000107570	13.2712	-1.04565	0.533528	-1.95988	0.0500101	0.999853	Gm44207
ENSMUSG00000029530	12.9396	-0.628226	0.488782	-1.28529	0.198691	0.999853	Ccr9
ENSMUSG00000089636	12.4749	0.0671182	0.548384	0.122393	0.902588	0.999853	1700058P15Rik
ENSMUSG00000082765	13.6127	-0.770998	0.62919	-1.22538	0.220431	0.999853	Gm14411
ENSMUSG00000022286	12.8678	0.587854	0.535918	1.09691	0.272681	0.999853	Grhl2
ENSMUSG00000027868	12.4386	0.202306	0.599406	0.337512	0.735731	0.999853	Tbx15
ENSMUSG00000087249	12.8884	-0.500087	0.484464	-1.03225	0.301956	0.999853	Gm16062
ENSMUSG00000102737	12.6027	0.711159	0.596961	1.1913	0.233536	0.999853	1700016A09Rik
ENSMUSG00000108910	13.0006	0.176707	0.693838	0.25468	0.79897	0.999853	Gm44625
ENSMUSG00000057577	13.6111	-0.0207607	0.742217	-0.0279712	0.977685	0.999853	Gm10025
ENSMUSG00000116494	13.3805	0.577508	0.731209	0.789799	0.429645	0.999853	Gm49449
ENSMUSG00000019489	13.2853	-0.316168	0.756681	-0.417836	0.676067	0.999853	Cd70
ENSMUSG00000042184	13.1462	1.40087	0.817081	1.71448	0.0864409	0.999853	1700069L16Rik
ENSMUSG00000030935	12.7269	0.922881	0.589059	1.5667	0.117184	0.999853	Acsm3
ENSMUSG00000032487	12.6653	0.444276	0.615363	0.721973	0.470311	0.999853	Ptgs2
ENSMUSG00000031380	13.0273	0.142324	0.489931	0.290498	0.771435	0.999853	Vegfd
ENSMUSG00000059775	12.5556	0.808582	0.552774	1.46277	0.14353	0.999853	Rps26-ps1
ENSMUSG00000023873	12.605	0.158321	0.538499	0.294004	0.768755	0.999853	1700010I14Rik
ENSMUSG00000034792	12.6711	-0.0309131	0.529783	-0.0583505	0.953469	0.999853	Gna15
ENSMUSG00000097797	13.0079	-0.360482	0.460654	-0.782543	0.433896	0.999853	Gm26901
ENSMUSG00000085944	13.9319	-1.3903	0.688423	-2.01955	0.0434305	0.999853	1700003D09Rik
ENSMUSG00000107531	13.1296	-0.32903	0.627075	-0.524705	0.599788	0.999853	E330037G11Rik
ENSMUSG00000080242	12.8579	0.405757	0.472016	0.859626	0.389995	0.999853	Atp6v0c-ps2
ENSMUSG00000095789	12.9282	-0.194384	0.575607	-0.337702	0.735588	0.999853	Nupr1l
ENSMUSG00000091534	13.4134	-0.465505	0.622555	-0.747734	0.454621	0.999853	Gm17195
ENSMUSG00000107216	13.2603	0.050618	0.555397	0.0911385	0.927383	0.999853	2210412B16Rik
ENSMUSG00000104777	12.726	0.166212	0.563349	0.295043	0.767961	0.999853	Gm4865
ENSMUSG00000111345	13.2414	0.376614	0.562067	0.670052	0.502825	0.999853	Gm48562
ENSMUSG00000097576	13.0767	-0.116795	0.662376	-0.176327	0.860037	0.999853	D930030I03Rik
ENSMUSG00000087013	13.5154	-0.391037	0.66784	-0.585526	0.558194	0.999853	2610027K06Rik
ENSMUSG00000075425	12.791	-0.0311863	0.482908	-0.0645804	0.948508	0.999853	Gm13547
ENSMUSG00000077524	12.6407	0.421689	0.49572	0.85066	0.394958	0.999853	n-R5s67
ENSMUSG00000094251	12.7177	0.22726	0.581906	0.390544	0.696134	0.999853	Gm25632
ENSMUSG00000104282	13.3619	-0.163996	0.581922	-0.281818	0.778083	0.999853	Gm37460
ENSMUSG00000109112	13.0427	0.120649	0.544567	0.22155	0.824664	0.999853	Gm44544
ENSMUSG00000013974	13.2971	0.0983968	0.581708	0.169152	0.865677	0.999853	Mcemp1
ENSMUSG00000019987	13.2027	0.0114335	0.52661	0.0217115	0.982678	0.999853	Arg1
ENSMUSG00000059434	13.4166	-0.453091	0.549799	-0.824103	0.409881	0.999853	Gckr
ENSMUSG00000012428	13.2443	-0.968948	0.546107	-1.77428	0.0760163	0.999853	Steap4
ENSMUSG00000097730	13.363	-0.492555	0.612936	-0.8036	0.421628	0.999853	Gm26588
ENSMUSG00000027075	12.5416	-0.0570452	0.709054	-0.0804526	0.935877	0.999853	Slc43a1
ENSMUSG00000028037	13.6306	-0.949793	0.583216	-1.62854	0.10341	0.999853	Ifi44
ENSMUSG00000049928	13.8731	-0.447697	0.590574	-0.758072	0.448408	0.999853	Glp2r
ENSMUSG00000097093	12.8475	-0.31608	0.522063	-0.605445	0.544883	0.999853	C330013E15Rik
ENSMUSG00000096039	12.688	0.339557	0.622035	0.54588	0.585148	0.999853	D830030K20Rik
ENSMUSG00000069972	13.1552	-0.578892	0.636978	-0.90881	0.36345	0.999853	Rps13-ps2
ENSMUSG00000111334	12.8976	0.498434	0.472127	1.05572	0.291095	0.999853	AC162938.1
ENSMUSG00000037683	13.5119	-0.842321	0.607845	-1.38575	0.165824	0.999853	Armc3
ENSMUSG00000097443	13.2807	-0.328983	0.534573	-0.615412	0.538283	0.999853	Gm17529
ENSMUSG00000103220	12.6992	0.386085	0.586425	0.658371	0.5103	0.999853	Gm37728
ENSMUSG00000097800	13.2965	-0.466148	0.595184	-0.783199	0.433511	0.999853	B230344G16Rik
ENSMUSG00000039476	12.7731	-0.328449	0.735431	-0.446608	0.655158	0.999853	Prrx2
ENSMUSG00000111583	13.6932	-0.651384	0.597765	-1.0897	0.275846	0.999853	Gm47962
ENSMUSG00000082208	12.4457	0.603906	0.571076	1.05749	0.290289	0.999853	Gm15379
ENSMUSG00000102950	12.8904	-0.222397	0.469788	-0.473398	0.635929	0.999853	Gm37018
ENSMUSG00000110062	13.5521	-0.0251122	0.510813	-0.0491612	0.960791	0.999853	B430319F04Rik
ENSMUSG00000090247	13.3593	-0.106273	0.536083	-0.19824	0.842857	0.999853	Bloc1s1
ENSMUSG00000026175	12.7239	0.621891	0.632253	0.98361	0.325307	0.999853	Vil1
ENSMUSG00000090098	13.3563	0.573818	0.561744	1.02149	0.307021	0.999853	Alms1-ps2
ENSMUSG00000019301	12.6526	-0.201343	0.692149	-0.290895	0.771131	0.999853	Hsd17b1
ENSMUSG00000055188	13.4682	0.119109	0.568714	0.209435	0.834109	0.999853	Rbm3os
ENSMUSG00000086630	13.5102	-0.790784	0.479655	-1.64865	0.0992188	0.999853	Gm14397
ENSMUSG00000114707	13.1132	0.127808	0.806891	0.158395	0.874145	0.999853	Gm47558
ENSMUSG00000103427	13.5198	0.0987384	0.63062	0.156574	0.875581	0.999853	Gm37534
ENSMUSG00000052014	13.3017	-0.774547	0.510338	-1.51771	0.129086	0.999853	A330070K13Rik
ENSMUSG00000097674	13.2403	-0.00709307	0.546961	-0.0129682	0.989653	0.999853	Gm26610
ENSMUSG00000001508	13.1562	0.583118	0.51892	1.12371	0.261134	0.999853	Sgca
ENSMUSG00000109873	14.0117	0.0281372	0.670257	0.0419798	0.966515	0.999853	Gm45407
ENSMUSG00000105791	13.5736	-0.406358	0.68112	-0.596602	0.550773	0.999853	Gm43341
ENSMUSG00000082345	12.9663	0.0821018	0.507678	0.16172	0.871526	0.999853	Gm13622
ENSMUSG00000000154	13.0347	-0.51354	0.538152	-0.954264	0.33995	0.999853	Slc22a18
ENSMUSG00000024338	12.8401	-0.451372	0.647522	-0.697076	0.485755	0.999853	Psmb8
ENSMUSG00000051617	12.4951	-0.193047	0.843298	-0.228919	0.818932	0.999853	Krt9
ENSMUSG00000109387	13.6263	-0.160738	0.497273	-0.323239	0.746515	0.999853	Gm45182
ENSMUSG00000115219	12.7433	-0.0294351	0.567386	-0.0518784	0.958626	0.999853	Eef1akmt4
ENSMUSG00000044176	13.0835	-0.242948	0.66428	-0.365731	0.714566	0.999853	Spink10
ENSMUSG00000083836	13.0231	-0.179368	0.475999	-0.376824	0.706304	0.999853	Ldha-ps2
ENSMUSG00000094724	12.5581	0.354261	0.577198	0.61376	0.539374	0.999853	Rnaset2b
ENSMUSG00000109501	13.1984	-0.0472177	0.492382	-0.0958964	0.923603	0.999853	Gm14377
ENSMUSG00000109205	14.0317	-0.745937	0.543237	-1.37314	0.16971	0.999853	Gm44954
ENSMUSG00000094595	13.0121	0.0792026	0.516085	0.153468	0.878029	0.999853	Fsbp
ENSMUSG00000051354	13.2258	0.394468	0.499389	0.789901	0.429586	0.999853	Samd3
ENSMUSG00000074136	12.7898	0.308092	0.51429	0.599064	0.54913	0.999853	4930513N10Rik
ENSMUSG00000106791	13.0977	-0.144172	0.596263	-0.241792	0.808941	0.999853	4930553P18Rik
ENSMUSG00000056316	12.8093	0.336554	0.49026	0.686481	0.49241	0.999853	Gm9996
ENSMUSG00000106291	13.4821	-0.361301	0.505422	-0.71485	0.474702	0.999853	1110003F10Rik
ENSMUSG00000067224	13.0894	0.291543	0.56258	0.518225	0.604301	0.999853	Gm3695
ENSMUSG00000108255	13.8957	0.293002	0.631864	0.46371	0.642855	0.999853	Gm16499
ENSMUSG00000069910	13.0334	0.271515	0.589175	0.460839	0.644914	0.999853	Spdl1
ENSMUSG00000116617	13.0966	0.304343	0.463569	0.656522	0.511488	0.999853	AC130815.1
ENSMUSG00000045662	13.0886	-0.0235498	0.495727	-0.0475055	0.96211	0.999853	Henmt1
ENSMUSG00000086662	12.5675	0.648559	0.550069	1.17905	0.238378	0.999853	BC046251
ENSMUSG00000027377	12.4503	0.0411757	0.695255	0.0592239	0.952774	0.999853	Mall
ENSMUSG00000085745	13.2004	0.390911	0.620356	0.630139	0.528604	0.999853	Gm14372
ENSMUSG00000107608	13.1148	0.375439	0.471634	0.796039	0.426009	0.999853	Gm43863
ENSMUSG00000107512	13.9431	-0.697937	0.647812	-1.07738	0.281312	0.999853	Gm44433
ENSMUSG00000081996	13.2407	-0.404466	0.573208	-0.705618	0.480426	0.999853	Gm7153
ENSMUSG00000085227	13.8156	-0.918147	0.446012	-2.05857	0.0395355	0.999853	6330418K02Rik
ENSMUSG00000099583	13.7448	-0.0124148	0.78989	-0.0157172	0.98746	0.999853	Hist1h3d
ENSMUSG00000002500	12.8095	0.121503	0.525449	0.231236	0.817132	0.999853	Rpl3l
ENSMUSG00000105822	13.7251	-0.239848	0.611606	-0.392161	0.694939	0.999853	Gm42969
ENSMUSG00000038239	13.6999	-0.831587	0.549539	-1.51325	0.130217	0.999853	Hrc
ENSMUSG00000097819	12.7446	0.691229	0.644124	1.07313	0.283213	0.999853	Gm26813
ENSMUSG00000090113	14.0221	-0.11161	0.678156	-0.164579	0.869276	0.999853	Nhlrc4
ENSMUSG00000097247	13.5155	-0.0576392	0.564187	-0.102163	0.918627	0.999853	1500012K07Rik
ENSMUSG00000028979	13.8943	-0.617543	0.538668	-1.14643	0.251619	0.999853	Masp2
ENSMUSG00000020258	12.6966	0.0408249	0.709218	0.0575632	0.954097	0.999853	Glyctk
ENSMUSG00000096727	13.2828	-0.0818894	0.556663	-0.147108	0.883047	0.999853	Psmb9
ENSMUSG00000039079	12.8257	-0.0105866	0.897159	-0.0118002	0.990585	0.999853	Trhr2
ENSMUSG00000083087	13.1722	0.395187	0.48548	0.814013	0.415638	0.999853	Gm11249
ENSMUSG00000050783	12.9351	0.538983	0.836492	0.644338	0.519356	0.999853	Htr1f
ENSMUSG00000024679	12.9534	0.682293	0.492639	1.38498	0.16606	0.999853	Ms4a6d
ENSMUSG00000058050	13.5029	0.0165374	0.500912	0.0330146	0.973663	0.999853	Gm9234
ENSMUSG00000060244	12.9588	0.543784	0.637228	0.853358	0.393461	0.999853	Alyref2
ENSMUSG00000102753	13.1836	-0.037278	0.476073	-0.0783031	0.937587	0.999853	Gm37056
ENSMUSG00000092229	13.2574	0.206719	0.568678	0.363509	0.716225	0.999853	Gm5977
ENSMUSG00000106717	13.2108	0.40119	0.464967	0.862835	0.388228	0.999853	Gm42798
ENSMUSG00000108389	13.1442	0.262046	0.472666	0.5544	0.579305	0.999853	Gm45206
ENSMUSG00000093656	13.4989	0.972181	0.635417	1.52999	0.12602	0.999853	Gm20628
ENSMUSG00000065590	12.5514	0.443962	0.865482	0.512965	0.607976	0.999853	Mir212
ENSMUSG00000097453	13.2279	-0.0995752	0.524125	-0.189984	0.849322	0.999853	Gm26894
ENSMUSG00000090459	13.4255	-0.368626	0.511498	-0.720679	0.471107	0.999853	Gm17210
ENSMUSG00000114612	13.5101	-0.393794	0.531603	-0.740768	0.458834	0.999853	Gm47550
ENSMUSG00000027368	13.1645	0.394155	0.545917	0.722006	0.470291	0.999853	Dusp2
ENSMUSG00000097619	13.6021	0.131254	0.495012	0.265153	0.790892	0.999853	4833422M21Rik
ENSMUSG00000097781	13.8657	-0.701111	0.450317	-1.55693	0.119488	0.999853	9330136K24Rik
ENSMUSG00000050147	13.0398	-0.0786343	0.585961	-0.134197	0.893247	0.999853	F2rl3
ENSMUSG00000115632	13.3903	-0.280592	0.529409	-0.530011	0.596105	0.999853	Gm17922
ENSMUSG00000111662	13.9705	-0.183845	0.556978	-0.330076	0.741342	0.999853	Gm7435
ENSMUSG00000048600	13.7092	-0.677512	0.609035	-1.11244	0.265951	0.999853	Gm5763
ENSMUSG00000085823	13.5609	-0.299028	0.52278	-0.571996	0.567325	0.999853	Gm13012
ENSMUSG00000065591	13.8672	-0.792256	0.46511	-1.70337	0.0884982	0.999853	Gm22753
ENSMUSG00000104108	13.4215	0.196044	0.477388	0.410659	0.681323	0.999853	Gm37876
ENSMUSG00000089669	13.7143	-0.451876	0.523755	-0.862761	0.388269	0.999853	Tnfsf13
ENSMUSG00000035852	13.4279	0.0766156	0.894427	0.085659	0.931738	0.999853	Misp
ENSMUSG00000103937	13.8385	-0.635128	0.518825	-1.22417	0.220889	0.999853	Gm37186
ENSMUSG00000037991	13.6863	-0.538646	0.488302	-1.1031	0.269984	0.999853	Rmi2
ENSMUSG00000015365	13.8872	0.00902535	0.744866	0.0121167	0.990332	0.999853	Mov10l1
ENSMUSG00000068259	13.8978	0.143227	0.652519	0.219499	0.826261	0.999853	Olfr461
ENSMUSG00000096553	13.6748	0.161633	0.514522	0.314143	0.753413	0.999853	Gm10097
ENSMUSG00000061132	12.6365	0.30466	0.772345	0.394461	0.693241	0.999853	Blnk
ENSMUSG00000022375	13.1722	-0.397817	0.625029	-0.636478	0.524465	0.999853	Lrrc6
ENSMUSG00000099784	12.7372	0.425236	0.75279	0.56488	0.572156	0.999853	Dalir
ENSMUSG00000106662	12.8542	0.666679	0.587038	1.13567	0.256097	0.999853	Gm43034
ENSMUSG00000041674	13.4136	0.537171	0.529102	1.01525	0.309987	0.999853	BC006965
ENSMUSG00000111465	13.4735	-0.00329274	0.46981	-0.00700866	0.994408	0.999853	Gm47113
ENSMUSG00000063696	13.5541	0.400192	0.570787	0.701122	0.483227	0.999853	Gm8730
ENSMUSG00000109165	13.3517	-0.509876	0.515036	-0.98998	0.322184	0.999853	Gm45148
ENSMUSG00000097493	13.0888	-0.110595	0.521454	-0.212089	0.832037	0.999853	9930014A18Rik
ENSMUSG00000108594	13.25	-0.0892745	0.486898	-0.183354	0.854521	0.999853	Gm44770
ENSMUSG00000112390	13.3749	0.0194793	0.45425	0.0428822	0.965795	0.999853	Gm20208
ENSMUSG00000024043	13.7514	-0.928903	0.494672	-1.87782	0.0604061	0.999853	Arhgap28
ENSMUSG00000116288	13.0267	0.798158	0.553458	1.44213	0.149265	0.999853	Gm41349
ENSMUSG00000078588	13.9942	-0.576315	0.601272	-0.958492	0.337815	0.999853	Ccdc24
ENSMUSG00000089633	13.4313	-0.0290387	0.546545	-0.0531314	0.957627	0.999853	A230009B12Rik
ENSMUSG00000013483	13.0817	0.329232	0.479603	0.686468	0.492418	0.999853	Card14
ENSMUSG00000104966	13.7748	-0.372474	0.487042	-0.764767	0.44441	0.999853	Gm43273
ENSMUSG00000098022	13.3609	0.140082	0.499535	0.280426	0.779151	0.999853	Zfp82
ENSMUSG00000032818	13.4377	0.250028	0.494431	0.50569	0.613075	0.999853	Loxhd1
ENSMUSG00000113404	13.7809	-0.0343996	0.514118	-0.0669099	0.946653	0.999853	Gm48622
ENSMUSG00000098682	13.1193	0.58926	0.504979	1.1669	0.243251	0.999853	Otx2os1
ENSMUSG00000109352	13.4096	0.820125	0.578629	1.41736	0.156378	0.999853	Gm18256
ENSMUSG00000032066	13.2765	0.279112	0.58623	0.476113	0.633994	0.999853	Bco2
ENSMUSG00000044017	12.8482	0.254029	0.702766	0.361471	0.717748	0.999853	Adgrd1
ENSMUSG00000052776	13.4518	0.148386	0.474485	0.312731	0.754485	0.999853	Oas1a
ENSMUSG00000031074	12.972	-0.53804	1.00926	-0.533101	0.593963	0.999853	Fgf3
ENSMUSG00000025779	12.9988	0.33103	0.555287	0.596142	0.55108	0.999853	Ly96
ENSMUSG00000001166	13.3297	-0.255121	0.602466	-0.423462	0.671958	0.999853	Oas1c
ENSMUSG00000103845	12.9841	0.523056	0.473392	1.10491	0.269199	0.999853	Gm19026
ENSMUSG00000027209	13.9671	-0.462593	0.504123	-0.917619	0.358818	0.999853	Fam227b
ENSMUSG00000038151	13.5302	0.371978	0.49293	0.754626	0.450474	0.999853	Prdm1
ENSMUSG00000072809	13.4572	0.579156	0.527066	1.09883	0.271842	0.999853	9330160F10Rik
ENSMUSG00000087383	13.7854	-0.484151	0.580797	-0.833598	0.404508	0.999853	Gm12446
ENSMUSG00000001558	13.3697	0.145264	0.479317	0.303065	0.76184	0.999853	Klhl10
ENSMUSG00000028989	12.9771	0.814013	0.498513	1.63288	0.102494	0.999853	Angptl7
ENSMUSG00000074342	14.0093	0.279167	0.606223	0.460502	0.645156	0.999853	I830077J02Rik
ENSMUSG00000040247	12.996	0.729474	0.550119	1.32603	0.18483	0.999853	Tbc1d10c
ENSMUSG00000043850	12.8665	0.483751	0.554618	0.872223	0.383087	0.999853	Clrn1
ENSMUSG00000102160	13.3635	0.586267	0.664447	0.882338	0.377594	0.999853	Gm36944
ENSMUSG00000074004	12.9935	0.44709	0.654397	0.683209	0.494475	0.999853	B3gnt6
ENSMUSG00000116840	13.4349	0.0745111	0.49552	0.15037	0.880473	0.999853	AC110166.2
ENSMUSG00000000365	13.8832	0.139374	0.564051	0.247095	0.804835	0.999853	Rnf17
ENSMUSG00000048327	14.2536	-0.922125	0.510622	-1.80588	0.0709363	0.999853	Ckap2l
ENSMUSG00000085562	13.0441	0.160279	0.517979	0.309432	0.756993	0.999853	2610028E06Rik
ENSMUSG00000097746	13.6115	0.342877	0.485535	0.706184	0.480073	0.999853	Gm6225
ENSMUSG00000105787	12.5189	0.730495	0.647968	1.12736	0.259589	0.999853	Gm8099
ENSMUSG00000081965	14.1468	-0.776905	0.515116	-1.50821	0.1315	0.999853	Gm11620
ENSMUSG00000037628	13.4491	0.705102	0.471509	1.49542	0.134806	0.999853	Cdkn3
ENSMUSG00000107875	12.8125	0.623649	0.506495	1.2313	0.21821	0.999853	Gm44696
ENSMUSG00000010136	13.3666	-0.809627	0.656153	-1.2339	0.21724	0.999853	Pifo
ENSMUSG00000106457	14.1606	0.10807	0.598003	0.180718	0.856589	0.999853	Gm42585
ENSMUSG00000062329	13.0343	0.764486	0.653468	1.16989	0.242045	0.999853	Cytl1
ENSMUSG00000097666	13.3532	0.192638	0.577612	0.333508	0.738751	0.999853	A330094K24Rik
ENSMUSG00000006546	13.0535	-0.290378	0.83619	-0.347264	0.728393	0.999853	Cryba2
ENSMUSG00000105289	14.6913	-0.763728	0.866691	-0.881199	0.37821	0.999853	Gm43483
ENSMUSG00000108390	14.3696	-0.876276	0.608925	-1.43905	0.150135	0.999853	Gm39038
ENSMUSG00000104467	13.7099	0.171969	0.61731	0.278578	0.780569	0.999853	Gm37660
ENSMUSG00000038805	15.015	-2.98605	1.78083	-1.67678	0.0935864	0.999853	Six3
ENSMUSG00000049130	12.8817	0.442609	0.573649	0.771568	0.44037	0.999853	C5ar1
ENSMUSG00000067780	13.3313	-0.135132	0.589638	-0.229178	0.818731	0.999853	Pi15
ENSMUSG00000091511	14.0735	-0.799049	0.484054	-1.65074	0.098791	0.999853	Vmn2r87
ENSMUSG00000097174	13.0524	0.804184	0.463939	1.73338	0.0830277	0.999853	Gm4890
ENSMUSG00000038352	14.6309	-0.471589	0.615383	-0.766334	0.443477	0.999853	Arl5c
ENSMUSG00000087361	13.9271	-0.728327	0.4917	-1.48124	0.138542	0.999853	0610043K17Rik
ENSMUSG00000009246	14.1987	-0.688329	0.486326	-1.41536	0.156962	0.999853	Trpm5
ENSMUSG00000043719	13.6438	0.0345374	0.538051	0.0641899	0.948819	0.999853	Col6a6
ENSMUSG00000089670	12.9418	0.627794	0.577952	1.08624	0.277373	0.999853	Gm16581
ENSMUSG00000062510	14.1983	0.0236961	0.564513	0.0419762	0.966518	0.999853	Nsl1
ENSMUSG00000000359	13.4333	0.289407	0.53474	0.541211	0.588362	0.999853	Rem1
ENSMUSG00000030859	13.2398	0.66678	0.557643	1.19571	0.231809	0.999853	Fam24a
ENSMUSG00000102142	13.7959	0.0810555	0.553205	0.14652	0.883511	0.999853	Gm26930
ENSMUSG00000106539	14.7811	-1.02538	0.668354	-1.53419	0.124983	0.999853	Gm43670
ENSMUSG00000087082	13.6209	0.354345	0.601862	0.588748	0.556031	0.999853	Gm15423
ENSMUSG00000035875	13.0507	0.253854	0.607352	0.417969	0.67597	0.999853	AI182371
ENSMUSG00000025176	13.7338	0.579328	0.587561	0.985988	0.324139	0.999853	Hoga1
ENSMUSG00000034435	14.3447	-0.438647	0.640858	-0.684469	0.493679	0.999853	Tmem30b
ENSMUSG00000024131	14.392	0.952851	0.721872	1.31997	0.186844	0.999853	Slc3a1
ENSMUSG00000041481	13.4661	0.220016	0.624909	0.352077	0.72478	0.999853	Serpina3g
ENSMUSG00000103711	14.2195	-1.12117	0.555279	-2.01912	0.0434751	0.999853	Tstd1
ENSMUSG00000028871	13.0933	-0.382363	0.727007	-0.525941	0.598929	0.999853	Rspo1
ENSMUSG00000094530	13.3757	0.526793	0.590165	0.89262	0.372061	0.999853	Gm21399
ENSMUSG00000026064	13.648	-0.249032	0.539891	-0.461264	0.644609	0.999853	Ptp4a1
ENSMUSG00000026807	13.523	-0.821486	0.685201	-1.1989	0.230568	0.999853	Ak8
ENSMUSG00000027364	13.9512	0.241546	0.520773	0.463821	0.642776	0.999853	Usp50
ENSMUSG00000103082	13.3521	0.180184	0.66297	0.271784	0.785788	0.999853	Gm38124
ENSMUSG00000024459	13.6782	-0.545745	0.493859	-1.10506	0.269132	0.999853	H2-M5
ENSMUSG00000052281	13.5077	-0.0550793	0.470392	-0.117092	0.906787	0.999853	Tspan32os
ENSMUSG00000091845	13.7526	0.0965817	0.52346	0.184506	0.853616	0.999853	Rpl36-ps12
ENSMUSG00000026388	13.4056	0.218234	0.508813	0.428908	0.66799	0.999853	3110009E18Rik
ENSMUSG00000034467	14.2034	-0.834152	0.45777	-1.82221	0.0684236	0.999853	Dynlrb2
ENSMUSG00000109245	13.95	-0.0108136	0.627167	-0.0172421	0.986244	0.999853	Gm44860
ENSMUSG00000111938	13.3305	-0.0146077	0.519657	-0.0281103	0.977574	0.999853	2900045O20Rik
ENSMUSG00000102526	13.4835	0.637193	0.516264	1.23424	0.217114	0.999853	Gm37785
ENSMUSG00000097665	14.2122	-0.146351	0.470388	-0.311128	0.755703	0.999853	Gm16853
ENSMUSG00000104795	13.8496	-0.193957	0.472296	-0.410667	0.681316	0.999853	Gm42783
ENSMUSG00000088226	14.7739	-0.79372	0.712386	-1.11417	0.265206	0.999853	Gm22596
ENSMUSG00000093989	13.892	-0.245231	0.500865	-0.489614	0.624407	0.999853	Rnasek
ENSMUSG00000086935	13.9322	0.276923	0.503728	0.549748	0.582492	0.999853	Gm15956
ENSMUSG00000108976	13.7301	0.414239	0.817769	0.506548	0.612472	0.999853	Gm29797
ENSMUSG00000041062	14.1457	-0.268396	0.741281	-0.362071	0.717299	0.999853	Mslnl
ENSMUSG00000043897	14.006	-0.145949	0.475501	-0.306938	0.758891	0.999853	Vmn2r2
ENSMUSG00000100807	14.0732	0.437044	0.716506	0.609966	0.541884	0.999853	Gm29521
ENSMUSG00000016942	14.1794	-0.714618	0.443882	-1.60993	0.107413	0.999853	Tmprss6
ENSMUSG00000062480	13.3417	0.332359	0.579097	0.573927	0.566017	0.999853	Acat3
ENSMUSG00000097623	14.0422	-0.673097	0.547	-1.23052	0.218501	0.999853	B230323A14Rik
ENSMUSG00000086670	14.3582	-0.227633	0.524067	-0.434358	0.664028	0.999853	Gm13194
ENSMUSG00000115360	13.9025	0.385751	0.536313	0.719264	0.471978	0.999853	Gm48932
ENSMUSG00000086269	13.9897	0.157515	0.462961	0.340234	0.73368	0.999853	Tmcc3os
ENSMUSG00000060380	14.339	-0.672476	0.539797	-1.24579	0.21284	0.999853	C030014I23Rik
ENSMUSG00000097456	14.0951	0.00389865	0.470556	0.00828521	0.993389	0.999853	Gm16958
ENSMUSG00000085982	14.1015	-0.256657	0.429674	-0.59733	0.550287	0.999853	9530051G07Rik
ENSMUSG00000038782	13.2467	0.339742	0.529764	0.641308	0.521323	0.999853	1700028J19Rik
ENSMUSG00000113894	13.3504	0.534285	0.470161	1.13639	0.255794	0.999853	Gm48838
ENSMUSG00000109231	14.1821	0.823484	0.60222	1.36742	0.171495	0.999853	Gm45737
ENSMUSG00000077167	13.7941	0.591782	0.503733	1.17479	0.240077	0.999853	Gm24119
ENSMUSG00000096856	13.5882	0.163555	0.522955	0.312751	0.75447	0.999853	Gm10778
ENSMUSG00000048065	14.77	1.50624	0.823841	1.82831	0.0675027	0.999853	Cyb5r2
ENSMUSG00000006542	13.3386	0.394503	0.527856	0.747369	0.454841	0.999853	Prkag3
ENSMUSG00000065434	13.5695	0.597387	0.467187	1.27869	0.201007	0.999853	Mir7-1
ENSMUSG00000106636	14.6063	-0.974321	0.624684	-1.5597	0.11883	0.999853	Gm43813
ENSMUSG00000097282	14.6132	-0.803691	0.591862	-1.3579	0.174495	0.999853	5031415H12Rik
ENSMUSG00000086499	14.2945	-0.573257	0.535173	-1.07116	0.284097	0.999853	Gm16217
ENSMUSG00000098789	14.8858	-1.30293	0.591851	-2.20146	0.0277037	0.999853	Jmjd7
ENSMUSG00000073753	14.0659	0.0321336	0.465915	0.0689688	0.945014	0.999853	Gm10571
ENSMUSG00000087630	13.8071	0.567223	0.495839	1.14397	0.252637	0.999853	Gm11513
ENSMUSG00000089663	13.9581	0.0571802	0.550371	0.103894	0.917254	0.999853	Gm15651
ENSMUSG00000093187	14.7743	-0.858927	0.593827	-1.44643	0.148057	0.999853	Mir344-2
ENSMUSG00000051297	14.3231	-0.291988	0.752269	-0.388144	0.69791	0.999853	2410124H12Rik
ENSMUSG00000087674	13.5899	0.142223	0.500955	0.283904	0.776484	0.999853	4930447M23Rik
ENSMUSG00000043648	13.3828	0.0485155	0.642815	0.0754736	0.939838	0.999853	Pld6
ENSMUSG00000098128	14.025	0.0275618	0.558877	0.0493164	0.960667	0.999853	Gm3693
ENSMUSG00000096753	13.3645	0.158561	0.600555	0.264024	0.791761	0.999853	Fam181a
ENSMUSG00000110127	14.5468	-0.806776	0.524903	-1.537	0.124293	0.999853	6430710M23Rik
ENSMUSG00000051008	14.5116	-0.002574	0.640916	-0.00401613	0.996796	0.999853	4930412M03Rik
ENSMUSG00000037833	14.1588	-0.247957	0.511385	-0.484873	0.627766	0.999853	Sh2d4b
ENSMUSG00000090260	14.6801	-0.21331	0.645039	-0.330692	0.740877	0.999853	2810442N19Rik
ENSMUSG00000087461	13.8478	0.151678	0.453093	0.334762	0.737805	0.999853	C230014O12Rik
ENSMUSG00000081179	14.4951	0.0947498	0.487181	0.194486	0.845795	0.999853	Gm13136
ENSMUSG00000021714	13.1185	1.07746	0.553919	1.94515	0.0517569	0.999853	Cenpk
ENSMUSG00000102594	15.0933	-0.645128	0.572258	-1.12734	0.2596	0.999853	Gm38381
ENSMUSG00000108753	13.7745	0.473761	0.513396	0.922798	0.356113	0.999853	Gm45094
ENSMUSG00000097970	14.6254	-0.0945977	0.495324	-0.190982	0.84854	0.999853	Gm27028
ENSMUSG00000021791	13.4783	-0.418881	0.780514	-0.536674	0.591493	0.999853	Dydc2
ENSMUSG00000105733	14.5691	-0.254453	0.513358	-0.495664	0.620131	0.999853	Gm42973
ENSMUSG00000106416	14.2485	-0.423585	0.520273	-0.814159	0.415554	0.999853	Gm5857
ENSMUSG00000092526	13.9325	0.487583	0.504024	0.967382	0.333353	0.999853	Gm17907
ENSMUSG00000055370	15.068	-0.817931	0.556931	-1.46864	0.141931	0.999853	Gm9968
ENSMUSG00000030068	14.6075	-0.72216	0.518497	-1.39279	0.163682	0.999853	Gm20696
ENSMUSG00000105568	14.8481	-0.620176	0.507585	-1.22182	0.221776	0.999853	Gm42971
ENSMUSG00000023984	14.075	-0.272087	0.60811	-0.447431	0.654564	0.999853	Gm20517
ENSMUSG00000054083	14.7188	-0.405964	0.501662	-0.809238	0.418378	0.999853	Capn12
ENSMUSG00000108530	14.4366	-0.467023	0.448603	-1.04106	0.297847	0.999853	4930429H19Rik
ENSMUSG00000100931	14.8855	-0.567043	0.543407	-1.0435	0.296719	0.999853	Gm28085
ENSMUSG00000084399	14.871	-0.554241	0.534696	-1.03655	0.299945	0.999853	Gm15666
ENSMUSG00000109552	14.3457	0.0166012	0.485697	0.0341801	0.972734	0.999853	Gm44531
ENSMUSG00000033427	13.8895	-0.284653	0.539564	-0.527562	0.597804	0.999853	Upb1
ENSMUSG00000055172	13.4524	0.633316	0.494416	1.28094	0.200216	0.999853	C1ra
ENSMUSG00000027901	14.3152	-0.231621	0.527271	-0.439282	0.660457	0.999853	Dennd2d
ENSMUSG00000050558	13.8325	0.307916	0.709931	0.433727	0.664487	0.999853	Prokr2
ENSMUSG00000025588	14.3116	-0.344319	0.477365	-0.721291	0.470731	0.999853	Nat1
ENSMUSG00000048001	13.8707	0.225518	0.581701	0.387688	0.698247	0.999853	Hes5
ENSMUSG00000055125	14.5723	-0.422637	0.612029	-0.69055	0.489848	0.999853	M5C1000I18Rik
ENSMUSG00000115819	13.7724	0.309252	0.473697	0.652846	0.513855	0.999853	Gm9108
ENSMUSG00000110768	14.2235	-0.16213	0.469826	-0.345085	0.73003	0.999853	Gm18541
ENSMUSG00000104901	13.3907	0.354905	0.642561	0.552329	0.580723	0.999853	Gm42692
ENSMUSG00000043889	14.1969	-0.249333	0.549295	-0.453915	0.64989	0.999853	Gm8399
ENSMUSG00000105389	14.1698	0.0344916	0.451473	0.0763979	0.939103	0.999853	BB187690
ENSMUSG00000029414	13.2466	0.513708	0.560451	0.916598	0.359353	0.999853	Kntc1
ENSMUSG00000060438	13.7175	0.216067	0.506209	0.426834	0.6695	0.999853	Rps10-ps1
ENSMUSG00000102517	14.3258	-0.317129	0.619487	-0.511922	0.608705	0.999853	Gm38085
ENSMUSG00000044139	14.6076	-0.748082	0.508837	-1.47018	0.141513	0.999853	Prss53
ENSMUSG00000102136	15.243	-0.723196	0.577737	-1.25177	0.210653	0.999853	Gm37107
ENSMUSG00000108854	14.0111	0.353639	0.576141	0.613806	0.539344	0.999853	D830036C21Rik
ENSMUSG00000104651	13.988	-0.455508	0.488739	-0.932008	0.351332	0.999853	Gm21168
ENSMUSG00000064288	14.4335	0.0167807	0.55308	0.0303405	0.975796	0.999853	Hist1h4k
ENSMUSG00000096775	13.5765	-0.181731	0.581666	-0.312432	0.754713	0.999853	Gm5796
ENSMUSG00000097532	13.0115	0.850719	0.756256	1.12491	0.260628	0.999853	Gm4349
ENSMUSG00000116919	13.2149	0.703575	0.675169	1.04207	0.297378	0.999853	AC165151.1
ENSMUSG00000107509	14.6402	-0.142345	0.601511	-0.236646	0.812932	0.999853	Gm44941
ENSMUSG00000113780	14.6108	-0.680783	0.614821	-1.10729	0.26817	0.999853	Gm33195
ENSMUSG00000090026	14.4515	0.0520581	0.518312	0.100438	0.919997	0.999853	Gm15996
ENSMUSG00000084584	14.408	0.27161	0.51172	0.530779	0.595572	0.999853	n-R5s15
ENSMUSG00000115044	14.6825	-0.314475	0.566999	-0.554632	0.579147	0.999853	Gm48978
ENSMUSG00000097860	14.9686	-0.545797	0.720069	-0.757979	0.448463	0.999853	Gm26857
ENSMUSG00000024397	14.0924	-0.113611	0.57096	-0.198983	0.842276	0.999853	Aif1
ENSMUSG00000019865	14.1809	0.431261	0.531447	0.811485	0.417087	0.999853	Nmbr
ENSMUSG00000040298	14.6508	-0.185588	0.633283	-0.293056	0.769479	0.999853	Btbd16
ENSMUSG00000029254	14.8453	-0.464409	0.506723	-0.916493	0.359408	0.999853	Stap1
ENSMUSG00000020930	14.1437	0.186419	0.566199	0.329247	0.741969	0.999853	Ccdc103
ENSMUSG00000113642	13.235	0.852542	0.75889	1.12341	0.261265	0.999853	Gm49329
ENSMUSG00000102234	14.8003	-0.639574	0.592835	-1.07884	0.28066	0.999853	Gm37885
ENSMUSG00000107994	14.376	-0.0160438	0.57428	-0.0279372	0.977712	0.999853	D830050J10Rik
ENSMUSG00000097899	14.3486	-0.00404725	0.426593	-0.00948737	0.99243	0.999853	Gm16894
ENSMUSG00000113428	14.4004	-0.426806	0.462116	-0.923591	0.355699	0.999853	Gm7664
ENSMUSG00000097479	14.4047	-0.182914	0.561127	-0.325976	0.744443	0.999853	Gm26582
ENSMUSG00000063011	14.0868	0.103346	0.678829	0.152242	0.878996	0.999853	Msln
ENSMUSG00000097324	14.2647	-0.310893	0.468407	-0.663724	0.506867	0.999853	Carmn
ENSMUSG00000089900	14.4664	-0.125443	0.511116	-0.24543	0.806124	0.999853	Tbc1d22bos
ENSMUSG00000075302	15.0174	-0.205713	0.585967	-0.351065	0.725539	0.999853	Erich2
ENSMUSG00000103050	14.029	0.286356	0.575698	0.497406	0.618903	0.999853	Gm38273
ENSMUSG00000010830	14.6039	-0.766522	0.535235	-1.43212	0.152109	0.999853	Kdelr3
ENSMUSG00000102133	14.9762	-0.41832	0.521922	-0.801499	0.422843	0.999853	Gm37106
ENSMUSG00000108070	14.6577	-0.425319	0.564943	-0.752854	0.451538	0.999853	Gm43872
ENSMUSG00000106694	15.0698	-0.290512	0.569708	-0.509931	0.610099	0.999853	Gm42894
ENSMUSG00000045052	13.9513	0.560021	0.452248	1.23831	0.215603	0.999853	Prlhr
ENSMUSG00000004371	15.1175	-0.540889	0.682592	-0.792404	0.428125	0.999853	Il11
ENSMUSG00000056457	13.9834	0.745826	0.65334	1.14156	0.253638	0.999853	Prl2c3
ENSMUSG00000032128	14.618	-0.466963	0.516231	-0.904563	0.365697	0.999853	Robo3
ENSMUSG00000085095	14.3553	-0.461572	0.61724	-0.747799	0.454581	0.999853	Gm15635
ENSMUSG00000060735	13.7176	-0.0595605	0.799855	-0.0744642	0.940641	0.999853	Rxfp3
ENSMUSG00000040345	13.3556	0.77944	0.64952	1.20002	0.23013	0.999853	Arhgap9
ENSMUSG00000037411	13.6405	0.293824	0.551633	0.532643	0.594281	0.999853	Serpine1
ENSMUSG00000087658	13.7821	-0.3284	0.66106	-0.496777	0.619346	0.999853	Hotairm1
ENSMUSG00000086191	14.1814	-0.0770441	0.619273	-0.124411	0.90099	0.999853	Zfp652os
ENSMUSG00000038756	13.9878	-0.114268	0.501497	-0.227854	0.81976	0.999853	Ttll6
ENSMUSG00000083621	15.0016	-0.122234	0.540317	-0.226227	0.821025	0.999853	Gm14586
ENSMUSG00000086629	14.1993	0.763658	0.482381	1.5831	0.113398	0.999853	2810403D21Rik
ENSMUSG00000020804	13.9857	-0.407852	0.597488	-0.682612	0.494852	0.999853	Aanat
ENSMUSG00000089968	14.3652	-0.169401	0.666561	-0.254142	0.799386	0.999853	Nckap5los
ENSMUSG00000096446	13.3387	0.850736	0.751412	1.13218	0.257558	0.999853	Gm8104
ENSMUSG00000021391	14.774	-0.488873	0.544706	-0.897498	0.369453	0.999853	Cenpp
ENSMUSG00000111521	14.7023	-0.796878	0.456973	-1.74382	0.081191	0.999853	Gm48529
ENSMUSG00000108681	14.9177	-0.0948852	0.604229	-0.157035	0.875217	0.999853	Gm17825
ENSMUSG00000030887	14.7667	0.191729	0.50567	0.379157	0.704571	0.999853	Pdzd9
ENSMUSG00000054966	14.2756	0.356353	0.500137	0.712511	0.476149	0.999853	Lmntd1
ENSMUSG00000107043	14.1423	0.215145	0.523684	0.410829	0.681198	0.999853	Gm42849
ENSMUSG00000087440	14.6748	-0.209098	0.547185	-0.382134	0.702362	0.999853	4930577N17Rik
ENSMUSG00000086920	14.5996	-0.251899	0.545623	-0.461673	0.644316	0.999853	Gm12207
ENSMUSG00000111997	14.5607	0.0900721	0.505352	0.178236	0.858537	0.999853	Gm5176
ENSMUSG00000086446	15.0547	0.322064	0.70073	0.459613	0.645794	0.999853	Prkag2os1
ENSMUSG00000104241	14.5296	-0.303903	0.520971	-0.58334	0.559665	0.999853	Gm9442
ENSMUSG00000094281	14.6047	-0.796389	0.483918	-1.64571	0.0998233	0.999853	Gm8034
ENSMUSG00000110409	15.3309	-0.714132	0.581552	-1.22798	0.219455	0.999853	Gm9908
ENSMUSG00000111066	14.1894	-0.0720864	0.555175	-0.129844	0.896689	0.999853	Gm30313
ENSMUSG00000050994	14.7079	-0.713291	0.580999	-1.2277	0.219561	0.999853	Adgb
ENSMUSG00000109089	15.1026	0.120151	0.609466	0.197142	0.843716	0.999853	4833411C07Rik
ENSMUSG00000113309	14.2141	-0.0558761	0.558156	-0.100108	0.920258	0.999853	Gm48408
ENSMUSG00000073158	12.9672	1.0616	0.739441	1.43568	0.151093	0.999853	9030624G23Rik
ENSMUSG00000067389	15.2441	0.241745	0.641453	0.376872	0.706269	0.999853	Gm17080
ENSMUSG00000050074	14.624	0.24146	0.475486	0.507818	0.611581	0.999853	Spink8
ENSMUSG00000109598	13.9846	-0.0838234	0.642174	-0.130531	0.896147	0.999853	Gm36356
ENSMUSG00000102331	14.868	-0.354052	0.570933	-0.620129	0.535173	0.999853	Gm19938
ENSMUSG00000111854	14.3997	-0.429773	0.617982	-0.695447	0.486775	0.999853	Gm48740
ENSMUSG00000112121	14.7358	-0.969858	0.537775	-1.80346	0.0713155	0.999853	C230072F16Rik
ENSMUSG00000097848	14.2794	0.956907	0.677007	1.41344	0.157527	0.999853	Gm807
ENSMUSG00000103756	14.4249	0.653333	0.575021	1.13619	0.255877	0.999853	Gm37285
ENSMUSG00000112601	15.7656	-0.992479	0.684399	-1.45015	0.147018	0.999853	Gm47590
ENSMUSG00000114951	15.2126	-0.48754	0.493179	-0.988566	0.322876	0.999853	Gm20784
ENSMUSG00000100876	14.1697	0.565256	0.585986	0.964624	0.334733	0.999853	2810454H06Rik
ENSMUSG00000065147	14.6237	-0.227858	0.44335	-0.513947	0.607289	0.999853	Snora31
ENSMUSG00000035799	14.9524	-0.716272	0.484521	-1.47831	0.139325	0.999853	Twist1
ENSMUSG00000103706	14.3968	0.125533	0.547686	0.229205	0.81871	0.999853	6820402A03Rik
ENSMUSG00000001349	14.1865	1.31998	0.746403	1.76845	0.0769851	0.999853	Cnn1
ENSMUSG00000051517	15.0069	-0.67845	0.429145	-1.58093	0.113893	0.999853	Arhgef39
ENSMUSG00000100548	14.5699	-0.224658	0.491472	-0.457112	0.64759	0.999853	Gm29585
ENSMUSG00000060715	15.2121	-0.281584	0.695855	-0.404659	0.685728	0.999853	1700019A02Rik
ENSMUSG00000109882	14.9014	-1.0242	0.553552	-1.85022	0.0642812	0.999853	Gm18706
ENSMUSG00000094091	14.1303	0.916576	0.591372	1.54991	0.121162	0.999853	Gm21885
ENSMUSG00000104625	15.2165	-0.393399	0.58997	-0.666813	0.504892	0.999853	Gm42448
ENSMUSG00000104929	15.3438	-0.192295	0.586132	-0.328074	0.742856	0.999853	Gm42766
ENSMUSG00000074207	14.907	-0.967046	0.513478	-1.88332	0.0596567	0.999853	Adh1
ENSMUSG00000020123	13.8909	-0.507212	0.90652	-0.559515	0.57581	0.999853	Avpr1a
ENSMUSG00000024517	15.0777	-1.15805	0.802865	-1.4424	0.149189	0.999853	Grp
ENSMUSG00000109121	13.9544	0.00903187	0.7955	0.0113537	0.990941	0.999853	Gm44644
ENSMUSG00000083854	14.6102	0.176486	0.511589	0.344977	0.730112	0.999853	Dnajc19-ps
ENSMUSG00000096351	14.6184	-0.314766	0.501492	-0.627659	0.530227	0.999853	Samd11
ENSMUSG00000001228	13.9385	0.876561	0.526927	1.66354	0.0962053	0.999853	Uhrf1
ENSMUSG00000102205	14.3765	0.144883	0.60418	0.239801	0.810485	0.999853	9430092D12Rik
ENSMUSG00000087120	14.3574	0.329262	0.451927	0.728574	0.466262	0.999853	Gm12279
ENSMUSG00000087484	14.4478	0.377332	0.479234	0.787365	0.431068	0.999853	2900089D17Rik
ENSMUSG00000107143	14.6844	-0.112062	0.458059	-0.244646	0.806731	0.999853	Gm6598
ENSMUSG00000051212	14.4993	0.300662	0.543424	0.553273	0.580077	0.999853	Gpr183
ENSMUSG00000104361	14.7734	-0.0825887	0.44786	-0.184407	0.853694	0.999853	Gm38080
ENSMUSG00000087578	15.1566	0.0310839	0.545853	0.0569455	0.954589	0.999853	Ccdc142os
ENSMUSG00000079575	15.1009	-0.126883	0.556437	-0.228028	0.819625	0.999853	Rbpj-ps3
ENSMUSG00000097072	14.5795	-0.347094	0.500756	-0.69314	0.488222	0.999853	Foxl2os
ENSMUSG00000103373	14.9194	-0.20406	0.602851	-0.338492	0.734992	0.999853	Gm37238
ENSMUSG00000115842	14.9123	0.0732661	0.499515	0.146675	0.883389	0.999853	Gm49092
ENSMUSG00000107689	14.2931	0.637997	0.532787	1.19747	0.231123	0.999853	Gm44386
ENSMUSG00000108341	15.5573	-0.00855052	0.610429	-0.0140074	0.988824	0.999853	Gm44746
ENSMUSG00000024784	15.0395	-0.0164933	0.56035	-0.0294339	0.976519	0.999853	Gpha2
ENSMUSG00000044976	14.249	-0.599313	0.768604	-0.779742	0.435543	0.999853	Wdr72
ENSMUSG00000107312	15.7303	-0.837224	0.845372	-0.990361	0.321998	0.999853	Gm43229
ENSMUSG00000109728	15.313	0.264508	0.661823	0.399666	0.689402	0.999853	Gm45359
ENSMUSG00000097992	14.8416	0.496424	0.669405	0.74159	0.458336	0.999853	Gm27016
ENSMUSG00000038331	14.7263	-0.0467148	0.483541	-0.0966099	0.923036	0.999853	Satb2
ENSMUSG00000043068	14.6994	0.650558	0.452038	1.43917	0.150103	0.999853	Fam89a
ENSMUSG00000086544	14.121	0.222578	0.594455	0.374424	0.708089	0.999853	Chn1os3
ENSMUSG00000073599	14.247	0.582105	0.475456	1.22431	0.220836	0.999853	Ecscr
ENSMUSG00000033581	15.2278	0.0596303	0.668031	0.0892628	0.928873	0.999853	Igf2bp2
ENSMUSG00000114041	13.7822	0.589219	0.73921	0.797094	0.425397	0.999853	Gm9269
ENSMUSG00000074479	14.2982	0.284936	0.456678	0.623932	0.532672	0.999853	Gm10704
ENSMUSG00000045075	14.6802	0.291334	0.528728	0.551009	0.581627	0.999853	Gm9796
ENSMUSG00000086740	15.2043	-0.184189	0.521349	-0.353292	0.723869	0.999853	Gm17029
ENSMUSG00000102498	14.8661	-0.0613051	0.472716	-0.129687	0.896814	0.999853	Gm19445
ENSMUSG00000082884	14.3272	0.261513	0.900287	0.290478	0.771451	0.999853	Gm13339
ENSMUSG00000074867	15.3061	-0.346647	0.540205	-0.641696	0.521071	0.999853	Zfp808
ENSMUSG00000073607	15.1276	-0.287892	0.471565	-0.610504	0.541528	0.999853	Gm10548
ENSMUSG00000082163	14.6798	-0.251266	0.496439	-0.506136	0.612761	0.999853	Gm14276
ENSMUSG00000116358	14.4078	0.294637	0.559364	0.526736	0.598377	0.999853	Gm49450
ENSMUSG00000087307	15.3887	-0.215973	0.647038	-0.333787	0.73854	0.999853	Gm12925
ENSMUSG00000031637	15.1389	0.0313676	0.531815	0.0589823	0.952966	0.999853	Lrp2bp
ENSMUSG00000030048	14.9137	-1.40764	0.674619	-2.08657	0.0369268	0.999853	Gkn3
ENSMUSG00000085945	15.4736	-0.66116	0.533519	-1.23924	0.215255	0.999853	2310014F06Rik
ENSMUSG00000102732	15.0373	-0.155141	0.462642	-0.335337	0.737371	0.999853	Gm37342
ENSMUSG00000090211	15.7253	-0.183822	0.55391	-0.331863	0.739993	0.999853	Gm16050
ENSMUSG00000106959	15.3567	-0.164489	0.521579	-0.315367	0.752483	0.999853	Gm42548
ENSMUSG00000047963	14.5321	-0.0839521	0.497895	-0.168614	0.8661	0.999853	Stbd1
ENSMUSG00000084890	14.3583	0.197627	0.50607	0.390513	0.696158	0.999853	A830036E02Rik
ENSMUSG00000026638	14.4056	0.122468	0.506084	0.241992	0.808787	0.999853	Irf6
ENSMUSG00000089706	14.7254	-0.283591	0.474976	-0.597065	0.550464	0.999853	B230216N24Rik
ENSMUSG00000039193	15.3667	-0.752229	0.476561	-1.57845	0.114461	0.999853	Nlrc4
ENSMUSG00000056071	15.197	-0.967494	0.626912	-1.54327	0.122765	0.999853	S100a9
ENSMUSG00000042788	14.8594	-0.229764	0.61655	-0.37266	0.709402	0.999853	Fam166b
ENSMUSG00000109792	14.9051	-0.707257	0.810327	-0.872805	0.382769	0.999853	Gm45426
ENSMUSG00000113898	15.512	-0.852927	0.485492	-1.75683	0.0789467	0.999853	Gm19144
ENSMUSG00000057092	15.0478	-0.278399	0.496487	-0.560738	0.574976	0.999853	Fxyd3
ENSMUSG00000030708	15.3825	-1.00687	0.596398	-1.68825	0.0913626	0.999853	Dnajb13
ENSMUSG00000020493	15.163	-0.139207	0.42372	-0.328537	0.742506	0.999853	Prr11
ENSMUSG00000091390	15.8459	-0.312713	0.595996	-0.524689	0.5998	0.999853	Gm17168
ENSMUSG00000110038	14.6701	0.394002	0.466762	0.844117	0.398604	0.999853	Gm45570
ENSMUSG00000102432	15.2962	0.946496	0.667704	1.41754	0.156326	0.999853	Gm29856
ENSMUSG00000106411	15.7233	-0.34825	0.694093	-0.501734	0.615855	0.999853	Gm42445
ENSMUSG00000083700	15.4669	-0.558349	0.50064	-1.11527	0.264735	0.999853	Gm2986
ENSMUSG00000114590	15.0635	0.773972	0.506034	1.52948	0.126144	0.999853	5930438M14Rik
ENSMUSG00000044062	15.8385	-0.932752	0.610251	-1.52847	0.126396	0.999853	Plekhd1os
ENSMUSG00000037583	14.3822	-0.0396544	0.558816	-0.0709615	0.943428	0.999853	Nr0b2
ENSMUSG00000081058	15.4437	-0.230279	0.51173	-0.450001	0.652709	0.999853	Hist2h3c2
ENSMUSG00000117327	14.2481	-0.206897	0.641864	-0.322338	0.747197	0.999853	AC114990.3
ENSMUSG00000079547	14.8385	-0.546468	0.698028	-0.782874	0.433701	0.999853	H2-DMb1
ENSMUSG00000091705	13.8495	0.140247	0.772351	0.181585	0.855909	0.999853	H2-Q2
ENSMUSG00000083496	14.1016	0.597088	0.530495	1.12553	0.260365	0.999853	Gm11263
ENSMUSG00000001333	14.3373	-0.107971	0.811215	-0.133098	0.894116	0.999853	Sync
ENSMUSG00000070343	15.1231	-0.135633	0.596682	-0.227312	0.820181	0.999853	Gm10288
ENSMUSG00000087439	14.7031	0.546241	0.470203	1.16171	0.245352	0.999853	Gm15788
ENSMUSG00000036598	14.4541	-0.0141579	0.497749	-0.0284438	0.977308	0.999853	Ccdc113
ENSMUSG00000026271	15.7004	-0.123917	0.550898	-0.224936	0.822029	0.999853	Gpr35
ENSMUSG00000114993	15.0859	0.0676384	0.476228	0.142029	0.887057	0.999853	Gm6363
ENSMUSG00000096841	15.2487	0.0211278	0.47806	0.0441949	0.964749	0.999853	Gm25596
ENSMUSG00000114953	15.417	-0.647817	0.526017	-1.23155	0.218117	0.999853	4930519K11Rik
ENSMUSG00000061535	14.1539	0.489783	0.600706	0.815346	0.414874	0.999853	C1qtnf7
ENSMUSG00000112637	16.142	-0.535871	0.689125	-0.777611	0.436799	0.999853	Gm48225
ENSMUSG00000021175	15.1452	-0.208836	0.526153	-0.396911	0.691433	0.999853	Cdca7l
ENSMUSG00000018238	14.8333	-0.0778137	0.643813	-0.120864	0.903799	0.999853	Gdf9
ENSMUSG00000098087	15.2149	0.173145	0.478882	0.361562	0.71768	0.999853	Gm17750
ENSMUSG00000081161	15.4454	-0.298229	0.564121	-0.528662	0.59704	0.999853	Gm12783
ENSMUSG00000033053	14.315	0.814555	0.49541	1.6442	0.100134	0.999853	1700028P14Rik
ENSMUSG00000035296	14.5527	0.247855	0.510151	0.485846	0.627077	0.999853	Sgcg
ENSMUSG00000034009	13.8699	0.758038	0.691583	1.09609	0.273039	0.999853	Rxfp1
ENSMUSG00000078920	14.7049	0.0601624	0.526843	0.114194	0.909084	0.999853	Ifi47
ENSMUSG00000034881	15.5744	-0.292834	0.459047	-0.637918	0.523527	0.999853	Tbxa2r
ENSMUSG00000023505	14.3776	0.582571	0.523255	1.11336	0.265555	0.999853	Cdca3
ENSMUSG00000113621	15.0997	0.067703	0.546565	0.12387	0.901418	0.999853	2900060N12Rik
ENSMUSG00000052616	14.2549	0.721832	0.522989	1.3802	0.167524	0.999853	Terb1
ENSMUSG00000086894	15.0739	0.414974	0.443312	0.936078	0.349233	0.999853	Gm15708
ENSMUSG00000011154	15.103	-0.40264	0.457663	-0.879774	0.378982	0.999853	Cfap161
ENSMUSG00000063383	15.3342	0.283741	0.509829	0.556542	0.57784	0.999853	Zfp947
ENSMUSG00000114540	15.6233	-0.398102	0.45514	-0.87468	0.381748	0.999853	Gm6421
ENSMUSG00000026828	14.6593	1.0913	0.548141	1.99091	0.0464903	0.999853	Galnt5
ENSMUSG00000097637	15.6642	-0.922812	0.451062	-2.04586	0.0407698	0.999853	4933417D19Rik
ENSMUSG00000074569	14.9305	0.350648	0.526594	0.66588	0.505488	0.999853	Gcnt7
ENSMUSG00000097033	15.4994	-0.21846	0.496882	-0.439662	0.660182	0.999853	Gm26819
ENSMUSG00000025150	14.8192	0.0673782	0.518154	0.130035	0.896539	0.999853	Cbr2
ENSMUSG00000025359	15.2621	-0.226235	0.459759	-0.492073	0.622668	0.999853	Pmel
ENSMUSG00000107161	15.8326	-0.268026	0.560714	-0.478009	0.632644	0.999853	Gm43850
ENSMUSG00000104379	15.2341	0.684809	0.542628	1.26202	0.20694	0.999853	Gm37509
ENSMUSG00000087530	14.8017	0.631322	0.571586	1.10451	0.269372	0.999853	Gm15533
ENSMUSG00000104720	15.2221	0.349013	0.489939	0.71236	0.476242	0.999853	Gm43138
ENSMUSG00000113789	15.4913	0.498398	0.507293	0.982467	0.32587	0.999853	Gm47322
ENSMUSG00000045877	15.6089	-0.45377	0.515421	-0.880387	0.37865	0.999853	4933415A04Rik
ENSMUSG00000083015	15.6337	-0.323567	0.611441	-0.529188	0.596675	0.999853	Gm16518
ENSMUSG00000031489	14.1079	0.438846	0.641118	0.684501	0.493659	0.999853	Adrb3
ENSMUSG00000061086	14.7465	-0.234416	0.607928	-0.385598	0.699794	0.999853	Myl4
ENSMUSG00000096141	15.2337	-0.199067	0.450465	-0.441914	0.658552	0.999853	Dnah7a
ENSMUSG00000022479	13.9144	0.468804	0.909759	0.515306	0.606339	0.999853	Vdr
ENSMUSG00000097915	15.8986	-0.603728	0.488331	-1.23631	0.216344	0.999853	A330009N23Rik
ENSMUSG00000047953	14.7883	0.163919	0.572321	0.28641	0.774564	0.999853	Gp5
ENSMUSG00000104918	15.156	0.369271	0.526017	0.702013	0.482671	0.999853	Gm42944
ENSMUSG00000093772	15.7394	-0.551106	0.456624	-1.20691	0.227465	0.999853	4931403E22Rik
ENSMUSG00000097151	15.3083	0.38547	0.465678	0.827759	0.407807	0.999853	Gm26514
ENSMUSG00000097178	14.6783	0.589266	0.696727	0.845763	0.397685	0.999853	2310002F09Rik
ENSMUSG00000035211	15.416	-0.0109851	0.441176	-0.0248995	0.980135	0.999853	Xrra1
ENSMUSG00000106484	15.414	-0.04112	0.499739	-0.0822831	0.934422	0.999853	Gm17833
ENSMUSG00000106832	15.0859	0.081174	0.665496	0.121975	0.902919	0.999853	Gm42632
ENSMUSG00000053545	15.3985	-0.174247	0.592495	-0.294091	0.768688	0.999853	6430503K07Rik
ENSMUSG00000112254	15.9947	-0.381588	0.512185	-0.745021	0.456259	0.999853	Gm47690
ENSMUSG00000086506	15.3851	-0.223595	0.461662	-0.484325	0.628155	0.999853	Gm15911
ENSMUSG00000015957	15.2135	-0.456578	0.656855	-0.695098	0.486994	0.999853	Wnt11
ENSMUSG00000085307	15.1908	0.950493	0.548864	1.73175	0.0833184	0.999853	Gm11525
ENSMUSG00000106815	15.8589	-0.793115	0.646333	-1.2271	0.219785	0.999853	Gm43658
ENSMUSG00000085145	15.507	0.630612	0.534132	1.18063	0.23775	0.999853	Gm11614
ENSMUSG00000106993	15.4062	-0.205734	0.429766	-0.478712	0.632144	0.999853	Gm43417
ENSMUSG00000109644	15.0005	0.320234	0.471065	0.679809	0.496625	0.999853	0610005C13Rik
ENSMUSG00000047180	15.3637	-0.0115074	0.524232	-0.0219509	0.982487	0.999853	Neurl3
ENSMUSG00000029605	15.4769	0.0422812	0.444423	0.0951372	0.924206	0.999853	Oas1b
ENSMUSG00000107230	15.4802	0.165458	0.500809	0.330381	0.741112	0.999853	Gm19265
ENSMUSG00000050926	14.8229	0.0365006	0.65892	0.0553945	0.955824	0.999853	Dcaf12l2
ENSMUSG00000105601	16.0557	-0.753135	0.4646	-1.62104	0.105009	0.999853	Gm42725
ENSMUSG00000110637	16.0491	-0.262745	0.597507	-0.439735	0.660129	0.999853	Gm7807
ENSMUSG00000087334	14.8603	0.295	0.722239	0.408452	0.682942	0.999853	AW495222
ENSMUSG00000107171	15.5533	0.218729	0.474152	0.461306	0.644579	0.999853	Gm42572
ENSMUSG00000081974	15.598	-0.639082	0.45424	-1.40693	0.15945	0.999853	Gm11960
ENSMUSG00000109956	14.6857	-0.0196524	0.546682	-0.0359486	0.971323	0.999853	Gm45428
ENSMUSG00000089827	15.6077	-0.0714976	0.474037	-0.150827	0.880112	0.999853	1700023H06Rik
ENSMUSG00000109282	15.5541	-0.099825	0.516245	-0.193367	0.846671	0.999853	Gm45188
ENSMUSG00000084241	15.7339	-0.27969	0.500336	-0.559006	0.576158	0.999853	Gm13416
ENSMUSG00000020973	15.0011	0.29641	0.51786	0.572375	0.567068	0.999853	Dnaaf2
ENSMUSG00000107624	15.8113	-0.221957	0.487744	-0.455068	0.64906	0.999853	Gm44005
ENSMUSG00000078653	15.2001	0.00568126	0.459331	0.0123685	0.990132	0.999853	Cntd1
ENSMUSG00000090194	15.1992	-0.121336	0.585909	-0.20709	0.83594	0.999853	Gm16161
ENSMUSG00000087397	15.0972	0.0639965	0.528243	0.12115	0.903572	0.999853	Rapgef3os2
ENSMUSG00000029597	15.7334	-0.335001	0.475914	-0.703911	0.481488	0.999853	Sds
ENSMUSG00000075511	15.2467	-0.294338	0.524015	-0.561698	0.574322	0.999853	1700001L05Rik
ENSMUSG00000025877	15.8641	-0.455098	0.450884	-1.00934	0.312809	0.999853	Hk3
ENSMUSG00000090667	14.6588	0.203638	0.79526	0.256065	0.7979	0.999853	Gm765
ENSMUSG00000032572	14.8556	0.0802823	0.514656	0.155992	0.876039	0.999853	Col6a4
ENSMUSG00000006649	15.3877	0.0361972	0.493387	0.0733648	0.941516	0.999853	Nphs1
ENSMUSG00000075266	15.7654	-0.269691	0.43287	-0.623031	0.533264	0.999853	Cenpw
ENSMUSG00000113841	15.8091	0.29622	0.510049	0.580768	0.561397	0.999853	Gm48701
ENSMUSG00000085614	15.6053	0.211786	0.531705	0.398314	0.690399	0.999853	1700123M08Rik
ENSMUSG00000091443	16.0327	-0.111808	0.477469	-0.234167	0.814855	0.999853	Gm17023
ENSMUSG00000049477	15.6316	0.0328837	0.494155	0.0665454	0.946944	0.999853	Gm8508
ENSMUSG00000104235	16.0341	-0.606679	0.475133	-1.27686	0.201651	0.999853	Gm37589
ENSMUSG00000045518	14.9294	0.151065	0.591919	0.255212	0.79856	0.999853	Onecut3
ENSMUSG00000115316	15.7158	-0.701935	0.590862	-1.18799	0.234839	0.999853	Gm49096
ENSMUSG00000074357	16.1996	-0.0596818	0.564697	-0.105688	0.91583	0.999853	AA386476
ENSMUSG00000097004	15.4156	-0.27634	0.575245	-0.480386	0.630953	0.999853	4731419I09Rik
ENSMUSG00000113816	15.402	-0.158967	0.523317	-0.303768	0.761305	0.999853	Gm47003
ENSMUSG00000097934	15.4605	0.132729	0.496241	0.267469	0.789108	0.999853	6720483E21Rik
ENSMUSG00000103657	16.6201	-1.01814	0.526869	-1.93243	0.0533069	0.999853	Gm37204
ENSMUSG00000102009	15.6542	-0.124791	0.531422	-0.234825	0.814345	0.999853	4933400F21Rik
ENSMUSG00000028115	16.3105	-0.769467	0.753758	-1.02084	0.30733	0.999853	Bnipl
ENSMUSG00000079679	16.1029	0.137667	0.588252	0.234027	0.814964	0.999853	Vwde
ENSMUSG00000026979	15.5155	-0.70713	0.566671	-1.24787	0.21208	0.999853	Psd4
ENSMUSG00000031688	15.8715	-0.899512	0.718418	-1.25207	0.210543	0.999853	Pou4f2
ENSMUSG00000086794	15.1336	-0.245407	0.557502	-0.44019	0.6598	0.999853	Gm11642
ENSMUSG00000111971	15.9834	-0.349428	0.527606	-0.662289	0.507786	0.999853	Gm48678
ENSMUSG00000103593	15.044	1.05002	0.500638	2.09738	0.0359603	0.999853	Gm37352
ENSMUSG00000107505	16.1847	-0.348845	0.538645	-0.647634	0.517222	0.999853	Gm18009
ENSMUSG00000084834	15.9027	-0.160514	0.419186	-0.382918	0.70178	0.999853	4930565N06Rik
ENSMUSG00000105071	15.8734	-0.0790537	0.511235	-0.154633	0.877111	0.999853	Gm43336
ENSMUSG00000096980	15.5257	0.219202	0.456846	0.479817	0.631358	0.999853	Gm26526
ENSMUSG00000025069	16.2264	-0.332031	0.479971	-0.691773	0.48908	0.999853	Gsto2
ENSMUSG00000089998	15.3253	0.671211	0.488196	1.37488	0.169168	0.999853	Phtf1os
ENSMUSG00000086359	16.2256	-0.107837	0.671154	-0.160674	0.87235	0.999853	9630013K17Rik
ENSMUSG00000086805	15.5375	0.0741146	0.494913	0.149753	0.88096	0.999853	4932443L11Rik
ENSMUSG00000087739	15.6695	0.281828	0.517316	0.54479	0.585898	0.999853	Gm24644
ENSMUSG00000111017	16.3699	-0.658475	0.681194	-0.966647	0.33372	0.999853	Gm48314
ENSMUSG00000087184	15.1075	-0.337729	0.683341	-0.494233	0.621142	0.999853	Gm11650
ENSMUSG00000073130	15.5916	0.422329	0.533972	0.79092	0.428991	0.999853	Gm1141
ENSMUSG00000025888	15.1692	0.278309	0.486932	0.571556	0.567623	0.999853	Casp1
ENSMUSG00000045322	15.6396	-0.65773	0.526768	-1.24861	0.211807	0.999853	Tlr9
ENSMUSG00000038457	15.8079	-0.187197	0.438262	-0.427134	0.669282	0.999853	Tmem255b
ENSMUSG00000070336	14.7797	0.653604	0.514517	1.27032	0.203969	0.999853	Fbxo47
ENSMUSG00000063623	15.5045	-0.616541	0.584257	-1.05526	0.291307	0.999853	C230062I16Rik
ENSMUSG00000034732	15.8674	0.342575	0.479729	0.7141	0.475165	0.999853	Pabpc5
ENSMUSG00000027699	15.6679	0.339213	0.432759	0.783838	0.433135	0.999853	Ect2
ENSMUSG00000050010	16.0361	-0.442954	0.48459	-0.91408	0.360675	0.999853	Shisa3
ENSMUSG00000107402	16.2314	-0.0872433	0.500831	-0.174197	0.86171	0.999853	4732416N19Rik
ENSMUSG00000097603	15.8839	-0.343397	0.477496	-0.719163	0.47204	0.999853	A430010J10Rik
ENSMUSG00000112169	15.1807	0.131974	0.515183	0.25617	0.79782	0.999853	Gm48536
ENSMUSG00000022838	15.6098	0.337969	0.461784	0.731877	0.464243	0.999853	Eaf2
ENSMUSG00000087336	15.8657	0.0346804	0.437187	0.0793264	0.936773	0.999853	Gm15860
ENSMUSG00000079076	15.9917	-0.839575	0.449442	-1.86804	0.0617569	0.999853	Gm3086
ENSMUSG00000050625	15.6729	0.158666	0.570827	0.277958	0.781045	0.999853	Ccdc121
ENSMUSG00000050157	15.6413	0.131534	0.425169	0.309369	0.757041	0.999853	Gm867
ENSMUSG00000087390	16.1101	-0.107146	0.4472	-0.239593	0.810646	0.999853	Gm7598
ENSMUSG00000028642	15.6948	0.00659716	0.433116	0.0152319	0.987847	0.999853	Tmem269
ENSMUSG00000099708	16.6346	-0.719874	0.507741	-1.4178	0.15625	0.999853	Gm29361
ENSMUSG00000060808	15.7242	0.408117	0.532606	0.766266	0.443518	0.999853	B9d1os
ENSMUSG00000102415	15.8964	-0.473605	0.494586	-0.957579	0.338275	0.999853	A430110C17Rik
ENSMUSG00000055197	15.2479	-0.245319	0.868251	-0.282544	0.777527	0.999853	Fev
ENSMUSG00000028841	16.6532	0.726	0.707227	1.02654	0.304635	0.999853	Cnksr1
ENSMUSG00000001494	17.0923	-0.847936	0.854209	-0.992657	0.320877	0.999853	Sost
ENSMUSG00000087670	16.4603	0.467522	0.716248	0.652737	0.513926	0.999853	9530036M11Rik
ENSMUSG00000073538	16.3821	-0.395981	0.7455	-0.531161	0.595307	0.999853	E330020D12Rik
ENSMUSG00000102336	16.5057	-0.314511	0.581323	-0.541026	0.58849	0.999853	Gm37233
ENSMUSG00000064090	15.5433	-0.182363	0.496712	-0.367141	0.713514	0.999853	Vrk2
ENSMUSG00000021040	15.8812	-0.562608	0.473817	-1.1874	0.235072	0.999853	Slirp
ENSMUSG00000085386	15.7255	0.339492	0.542661	0.625606	0.531574	0.999853	Gm13630
ENSMUSG00000080059	15.7526	-0.141074	0.475054	-0.296965	0.766493	0.999853	Rps19-ps3
ENSMUSG00000080824	16.2999	-0.758544	0.430709	-1.76115	0.0782124	0.999853	Gm9001
ENSMUSG00000047642	15.8497	0.311172	0.428918	0.72548	0.468157	0.999853	D930020B18Rik
ENSMUSG00000087611	15.5468	0.0644409	0.427665	0.150681	0.880227	0.999853	4930458D05Rik
ENSMUSG00000110635	16.7432	-0.419273	0.499351	-0.839636	0.401113	0.999853	Gm45853
ENSMUSG00000087355	15.3177	0.283364	0.534687	0.529962	0.596138	0.999853	Gm13187
ENSMUSG00000066245	15.303	0.985546	0.524007	1.88079	0.0600006	0.999853	Gm10156
ENSMUSG00000081309	16.2684	-0.00221711	0.462579	-0.00479295	0.996176	0.999853	Gm12397
ENSMUSG00000086770	15.4888	0.426306	0.525084	0.811883	0.416859	0.999853	Gm15351
ENSMUSG00000104572	14.3552	1.00701	0.853545	1.1798	0.238079	0.999853	Fbxw23
ENSMUSG00000084821	16.6457	-0.748011	0.559502	-1.33692	0.181248	0.999853	Gm15880
ENSMUSG00000028699	16.4441	-0.0442181	0.550983	-0.0802531	0.936036	0.999853	Tspan1
ENSMUSG00000099512	16.2198	-0.167111	0.50695	-0.329639	0.741672	0.999853	Gm28703
ENSMUSG00000038522	15.7443	0.45743	0.496183	0.921898	0.356582	0.999853	Mfsd4b1
ENSMUSG00000040495	16.1924	-0.360278	0.575965	-0.625521	0.531629	0.999853	Chrm4
ENSMUSG00000018927	14.1779	1.28596	0.744241	1.72789	0.0840085	0.999853	Ccl6
ENSMUSG00000071713	15.6494	-0.0898236	0.555969	-0.161562	0.871651	0.999853	Csf2rb
ENSMUSG00000044811	15.3698	-0.127421	0.572707	-0.22249	0.823933	0.999853	Cd300c2
ENSMUSG00000072720	15.6562	-0.455061	0.672052	-0.677122	0.498328	0.999853	Myo18b
ENSMUSG00000037627	15.6265	0.3305	0.598539	0.552179	0.580826	0.999853	Rgs22
ENSMUSG00000107749	16.4351	-0.149418	0.503302	-0.296876	0.766561	0.999853	Gm44321
ENSMUSG00000039358	15.7793	-0.29855	0.713811	-0.418248	0.675766	0.999853	Drd5
ENSMUSG00000078923	15.8293	0.0838644	0.505367	0.165947	0.868198	0.999853	Ube2v1
ENSMUSG00000089842	16.322	-0.465844	0.571527	-0.815086	0.415023	0.999853	Pitpnm2os2
ENSMUSG00000103867	16.0821	0.211537	0.460653	0.45921	0.646083	0.999853	9630010A21Rik
ENSMUSG00000097357	15.7528	0.204991	0.448806	0.456748	0.647852	0.999853	Gm16793
ENSMUSG00000104293	15.9192	0.165662	0.603437	0.27453	0.783677	0.999853	Gm38043
ENSMUSG00000040714	15.2732	-0.278466	0.717045	-0.388352	0.697756	0.999853	Klc3
ENSMUSG00000085802	16.1855	-0.0840004	0.428777	-0.195907	0.844683	0.999853	Gm16059
ENSMUSG00000087475	17.0804	-0.560864	0.52226	-1.07392	0.282859	0.999853	4933406I18Rik
ENSMUSG00000081219	15.66	0.60749	0.437949	1.38713	0.165404	0.999853	Bambi-ps1
ENSMUSG00000089820	16.0521	0.619367	0.580585	1.0668	0.286064	0.999853	Gm15775
ENSMUSG00000103622	16.0026	-0.245297	0.435701	-0.562993	0.57344	0.999853	Gm38391
ENSMUSG00000032595	16.2826	-0.653409	0.506173	-1.29088	0.196745	0.999853	Cdhr4
ENSMUSG00000078897	16.3054	0.0427421	0.464305	0.0920562	0.926653	0.999853	Gm4724
ENSMUSG00000099061	14.9985	0.891427	0.58312	1.52872	0.126334	0.999853	Gm28050
ENSMUSG00000113771	16.2521	-0.337143	0.523338	-0.644217	0.519435	0.999853	Gm36529
ENSMUSG00000104103	16.5746	-0.284718	0.55783	-0.510404	0.609769	0.999853	Gm9517
ENSMUSG00000058281	15.4847	0.717996	0.484321	1.48248	0.138213	0.999853	Gm10038
ENSMUSG00000071036	16.0569	0.121398	0.653296	0.185823	0.852583	0.999853	Gm10309
ENSMUSG00000104724	15.9508	-0.0238073	0.507238	-0.0469351	0.962565	0.999853	Gm43162
ENSMUSG00000110816	17.1305	-0.60758	0.590939	-1.02816	0.303875	0.999853	Gm19178
ENSMUSG00000106385	16.7834	-0.798306	0.573278	-1.39253	0.163762	0.999853	Gm42943
ENSMUSG00000111512	15.8616	0.0309659	0.772629	0.0400786	0.96803	0.999853	Gm17853
ENSMUSG00000039865	14.4512	1.08328	0.796659	1.35978	0.1739	0.999853	Slc44a3
ENSMUSG00000045467	15.69	0.460822	0.426404	1.08072	0.279823	0.999853	Ttll13
ENSMUSG00000080845	16.6128	-0.186327	0.51344	-0.3629	0.71668	0.999853	Gm9115
ENSMUSG00000066537	15.8394	0.114628	0.470028	0.243875	0.807328	0.999853	Vmn2r57
ENSMUSG00000089838	16.2412	-0.391232	0.545024	-0.717824	0.472866	0.999853	Gm2962
ENSMUSG00000017817	14.8952	0.568435	0.588273	0.966276	0.333906	0.999853	Jph2
ENSMUSG00000117093	15.312	0.290896	0.597118	0.487167	0.62614	0.999853	CT573017.2
ENSMUSG00000093985	15.0259	1.23666	0.955176	1.2947	0.195424	0.999853	Gm10406
ENSMUSG00000105590	16.7613	-0.464857	0.567553	-0.819055	0.412755	0.999853	Gm43364
ENSMUSG00000109418	16.8734	0.192238	0.644096	0.298462	0.765351	0.999853	Gm44800
ENSMUSG00000108394	16.8542	-1.0409	0.484233	-2.14959	0.0315876	0.999853	Gm45477
ENSMUSG00000031312	16.0494	0.0480167	0.477018	0.10066	0.91982	0.999853	Itgb1bp2
ENSMUSG00000104100	17.0205	-0.853056	0.556797	-1.53208	0.125503	0.999853	Gm37880
ENSMUSG00000097868	16.0388	0.167884	0.492733	0.34072	0.733314	0.999853	A330069E16Rik
ENSMUSG00000065599	16.0909	0.14912	0.438669	0.339937	0.733904	0.999853	Mir23b
ENSMUSG00000021874	16.777	-0.414028	0.453222	-0.913521	0.360969	0.999853	4933413J09Rik
ENSMUSG00000055271	16.5038	0.644665	0.558439	1.1544	0.248334	0.999853	9330161L09Rik
ENSMUSG00000043807	16.4641	0.200853	0.654037	0.307097	0.75877	0.999853	Ly6g5b
ENSMUSG00000103435	16.0831	0.0561499	0.646591	0.0868399	0.930799	0.999853	Gm36992
ENSMUSG00000114121	16.8488	0.245064	0.835783	0.293215	0.769358	0.999853	Gm47728
ENSMUSG00000115834	16.654	0.133072	0.516803	0.257491	0.7968	0.999853	Gm10385
ENSMUSG00000110698	16.5778	-0.18312	0.725259	-0.25249	0.800663	0.999853	Gm45875
ENSMUSG00000050777	15.327	0.340347	0.720364	0.472466	0.636594	0.999853	Tmem37
ENSMUSG00000017718	16.4488	-0.461418	0.444589	-1.03785	0.299338	0.999853	Afmid
ENSMUSG00000019989	15.1277	0.240907	0.753142	0.31987	0.749067	0.999853	Enpp3
ENSMUSG00000020679	17.0666	-0.614289	0.545158	-1.12681	0.259823	0.999853	Hnf1b
ENSMUSG00000034209	16.4151	-0.427609	0.454869	-0.940069	0.347182	0.999853	Rasl10a
ENSMUSG00000116506	15.6797	0.544648	0.558263	0.975612	0.329257	0.999853	5730414N17Rik
ENSMUSG00000043168	15.361	-0.230684	0.872898	-0.264274	0.791569	0.999853	4930426D05Rik
ENSMUSG00000111118	15.2964	0.640349	0.571593	1.12029	0.262591	0.999853	Gm6545
ENSMUSG00000028036	16.6277	-0.741398	0.4685	-1.58249	0.113538	0.999853	Ptgfr
ENSMUSG00000097855	16.9487	-0.282095	0.543699	-0.518844	0.60387	0.999853	A930007I19Rik
ENSMUSG00000096935	15.915	0.40081	0.570685	0.70233	0.482473	0.999853	1700113A16Rik
ENSMUSG00000018983	16.3643	-0.370957	0.428292	-0.866132	0.386418	0.999853	E2f2
ENSMUSG00000032643	16.446	-0.828609	0.498765	-1.66132	0.0966491	0.999853	Fhl3
ENSMUSG00000087202	16.0016	0.131331	0.521896	0.251641	0.801318	0.999853	Gm15813
ENSMUSG00000022385	17.0653	0.0430128	0.51366	0.083738	0.933265	0.999853	Gtse1
ENSMUSG00000114321	15.9822	-0.198318	0.461524	-0.429703	0.667412	0.999853	Gm8971
ENSMUSG00000097747	15.6293	0.874581	0.447037	1.95639	0.0504187	0.999853	Gm26534
ENSMUSG00000047161	16.1096	0.0339845	0.442097	0.076871	0.938726	0.999853	Chst9
ENSMUSG00000085105	16.0262	0.336076	0.435912	0.770972	0.440724	0.999853	Gm12758
ENSMUSG00000091050	16.3301	0.112098	0.443931	0.252513	0.800645	0.999853	9330020H09Rik
ENSMUSG00000089999	16.2226	0.214426	0.681382	0.314693	0.752995	0.999853	Gm6485
ENSMUSG00000055341	15.8468	0.428808	0.547721	0.782895	0.433689	0.999853	Zfp457
ENSMUSG00000018595	16.2884	-0.482088	0.503838	-0.956832	0.338652	0.999853	Glra4
ENSMUSG00000049891	15.7131	0.101627	0.583618	0.174132	0.861762	0.999853	Gm7984
ENSMUSG00000018893	15.4335	0.378609	0.544825	0.694918	0.487107	0.999853	Mb
ENSMUSG00000102963	17.0493	-0.866514	0.572133	-1.51453	0.129891	0.999853	Gm37945
ENSMUSG00000108367	16.001	-0.582198	0.693051	-0.84005	0.40088	0.999853	Gm4881
ENSMUSG00000061816	16.404	0.419562	0.60982	0.688009	0.491447	0.999853	Myl1
ENSMUSG00000109585	16.9018	-0.385969	0.515806	-0.748284	0.454289	0.999853	Gm45358
ENSMUSG00000097843	17.029	0.223085	0.793118	0.281277	0.778498	0.999853	Gm26755
ENSMUSG00000109674	16.0356	-0.0494104	0.595486	-0.0829749	0.933872	0.999853	Gm45470
ENSMUSG00000046167	14.6967	1.09159	0.827209	1.31961	0.186966	0.999853	Gldn
ENSMUSG00000024691	16.0797	-0.077338	0.506443	-0.152708	0.878629	0.999853	Fam111a
ENSMUSG00000024177	16.3322	-0.0942731	0.414602	-0.227382	0.820127	0.999853	Nme4
ENSMUSG00000097838	15.6857	0.541891	0.54777	0.989267	0.322533	0.999853	C530050E15Rik
ENSMUSG00000028487	16.1166	-0.152969	0.449456	-0.340343	0.733599	0.999853	Bnc2
ENSMUSG00000043953	15.9709	0.400302	0.476008	0.840957	0.400372	0.999853	Ccrl2
ENSMUSG00000110070	16.499	-0.0350376	0.497005	-0.0704974	0.943798	0.999853	Gm45619
ENSMUSG00000100599	15.9654	0.575692	0.461983	1.24613	0.212716	0.999853	1700120C14Rik
ENSMUSG00000092593	16.6946	-0.444961	0.484047	-0.919251	0.357964	0.999853	Gm20492
ENSMUSG00000019278	15.302	-0.388609	0.90227	-0.430701	0.666686	0.999853	Dpep1
ENSMUSG00000102969	16.7675	-0.30844	0.501096	-0.61553	0.538205	0.999853	Gm33366
ENSMUSG00000109638	17.5746	-0.763156	0.615018	-1.24087	0.214655	0.999853	Gm45630
ENSMUSG00000105293	17.0656	-0.842632	0.464072	-1.81574	0.069411	0.999853	Gm42843
ENSMUSG00000086719	16.1553	0.109163	0.532684	0.20493	0.837627	0.999853	Gm16275
ENSMUSG00000040950	16.4592	-0.295035	0.568208	-0.519238	0.603595	0.999853	Mgl2
ENSMUSG00000072683	16.7665	-0.748591	0.456761	-1.63891	0.101232	0.999853	Gm7457
ENSMUSG00000111212	17.2272	-0.900389	0.510122	-1.76505	0.0775557	0.999853	Gm47087
ENSMUSG00000107306	17.0228	0.864968	0.677179	1.27731	0.201493	0.999853	Gm42577
ENSMUSG00000087135	16.6562	-0.0863566	0.422884	-0.204209	0.83819	0.999853	Gm16096
ENSMUSG00000021135	16.3838	0.595965	0.51993	1.14624	0.251696	0.999853	Slc10a1
ENSMUSG00000062382	16.4885	-0.468624	0.49493	-0.946849	0.343716	0.999853	Ftl1-ps1
ENSMUSG00000009145	17.0399	-0.185823	0.482114	-0.385434	0.699916	0.999853	Dqx1
ENSMUSG00000060063	16.0446	0.398039	0.441548	0.901462	0.367343	0.999853	Alox5ap
ENSMUSG00000043008	16.628	-0.628226	0.553213	-1.13559	0.256126	0.999853	Klhl6
ENSMUSG00000081344	16.4274	-0.0855534	0.542347	-0.157747	0.874656	0.999853	Gm14303
ENSMUSG00000064343	17.0009	-0.754086	0.523109	-1.44155	0.14943	0.999853	mt-Tq
ENSMUSG00000087312	17.1435	-0.316287	0.445957	-0.709232	0.47818	0.999853	Gm13833
ENSMUSG00000060647	16.3146	0.063109	0.433668	0.145524	0.884297	0.999853	Gm7099
ENSMUSG00000113432	16.606	0.0536969	0.509511	0.105389	0.916067	0.999853	8430406P12Rik
ENSMUSG00000044694	16.6635	-0.93127	0.506088	-1.84014	0.0657482	0.999853	2010007H06Rik
ENSMUSG00000086034	15.8369	0.188417	0.542135	0.347547	0.728181	0.999853	Gm15201
ENSMUSG00000088170	16.303	0.288155	0.455918	0.632031	0.527367	0.999853	Gm25219
ENSMUSG00000086600	16.6628	-0.415904	0.481481	-0.863801	0.387697	0.999853	C030005K06Rik
ENSMUSG00000105366	16.382	-0.308416	0.520491	-0.592549	0.553483	0.999853	Gm43719
ENSMUSG00000098404	16.0542	0.405744	0.485876	0.835077	0.403674	0.999853	Mrip-ps
ENSMUSG00000113140	16.9462	-0.146457	0.540139	-0.271146	0.786278	0.999853	Gm48624
ENSMUSG00000083064	16.3313	0.488033	0.526741	0.926514	0.354179	0.999853	Gm7785
ENSMUSG00000097791	15.2895	1.06498	0.673976	1.58014	0.114075	0.999853	Gm17315
ENSMUSG00000071001	15.0379	0.65451	0.632372	1.03501	0.300665	0.999853	Hrct1
ENSMUSG00000113020	17.5035	-0.567925	0.660873	-0.859355	0.390145	0.999853	Gm48063
ENSMUSG00000087193	16.2985	-0.0349925	0.416324	-0.084051	0.933016	0.999853	Gm14820
ENSMUSG00000097355	17.8505	-0.721625	0.637606	-1.13177	0.25773	0.999853	Gm26662
ENSMUSG00000071342	17.0165	0.749465	0.610878	1.22687	0.219873	0.999853	Lsmem1
ENSMUSG00000103272	16.5936	0.313983	0.494412	0.635062	0.525388	0.999853	Gm37914
ENSMUSG00000073415	16.8067	-0.31274	0.414304	-0.754857	0.450335	0.999853	Gm10501
ENSMUSG00000003341	15.3536	0.429427	0.744638	0.576692	0.564147	0.999853	Atp8b3
ENSMUSG00000035983	16.3328	0.151636	0.545852	0.277797	0.781168	0.999853	Gm7008
ENSMUSG00000097335	17.0705	-0.218832	0.473891	-0.461778	0.644241	0.999853	Gm26563
ENSMUSG00000084755	17.3025	-0.209506	0.636298	-0.329257	0.741961	0.999853	Gm16276
ENSMUSG00000105950	16.4939	0.117801	0.429123	0.274516	0.783688	0.999853	Gm43679
ENSMUSG00000048544	17.2274	-0.216636	0.444643	-0.487214	0.626107	0.999853	5930422O12Rik
ENSMUSG00000085912	17.22	0.369892	0.650583	0.568555	0.569658	0.999853	Trp53cor1
ENSMUSG00000084603	16.4968	0.266512	0.501008	0.531952	0.594759	0.999853	Gm22204
ENSMUSG00000110146	16.8252	-0.589688	0.491392	-1.20004	0.230126	0.999853	Gm45487
ENSMUSG00000040706	15.9861	0.144769	0.549816	0.263305	0.792316	0.999853	Agmat
ENSMUSG00000045392	16.0926	0.230946	0.653227	0.353545	0.72368	0.999853	Olfr1033
ENSMUSG00000035692	17.3687	-0.405647	0.479904	-0.845267	0.397962	0.999853	Isg15
ENSMUSG00000081157	16.5333	0.139899	0.540881	0.25865	0.795905	0.999853	Gm13552
ENSMUSG00000107504	16.9651	-0.100615	0.414544	-0.242711	0.808229	0.999853	Gm35549
ENSMUSG00000058838	17.1949	-0.426758	0.483015	-0.883529	0.37695	0.999853	Rps27a-ps2
ENSMUSG00000081984	16.0002	0.496862	0.477853	1.03978	0.298441	0.999853	Dnajb3
ENSMUSG00000113650	17.5084	-0.653822	0.562911	-1.1615	0.245438	0.999853	Gm47826
ENSMUSG00000106354	17.2377	0.196498	0.544856	0.360642	0.718367	0.999853	Gm42607
ENSMUSG00000113196	17.608	-0.46798	0.479509	-0.975957	0.329086	0.999853	D230049E03Rik
ENSMUSG00000042821	16.1276	0.423204	0.46392	0.912235	0.361645	0.999853	Snai1
ENSMUSG00000111910	17.7595	-0.743902	0.554457	-1.34168	0.179701	0.999853	Gm47472
ENSMUSG00000085178	16.9713	-0.632023	0.51573	-1.22549	0.22039	0.999853	Kdm6bos
ENSMUSG00000073985	16.4163	0.752107	0.503419	1.494	0.135176	0.999853	Gm10602
ENSMUSG00000035085	17.8953	-0.982984	0.63273	-1.55356	0.120289	0.999853	1700020L24Rik
ENSMUSG00000063314	16.8226	0.119322	0.458488	0.26025	0.794671	0.999853	Gm12657
ENSMUSG00000103800	16.5773	0.196051	0.684176	0.286551	0.774456	0.999853	Pcdha8
ENSMUSG00000105776	16.2431	0.204448	0.524624	0.389704	0.696755	0.999853	Gm43292
ENSMUSG00000072115	17.2066	-0.460185	0.425977	-1.08031	0.280006	0.999853	Ang
ENSMUSG00000015340	16.9148	-0.100064	0.437556	-0.22869	0.81911	0.999853	Cybb
ENSMUSG00000002699	16.9646	-0.00880941	0.411574	-0.0214042	0.982923	0.999853	Lcp2
ENSMUSG00000068686	17.1116	-0.039929	0.443838	-0.0899631	0.928317	0.999853	Cd59b
ENSMUSG00000105100	17.3521	-0.47972	0.553351	-0.866936	0.385977	0.999853	Gm44349
ENSMUSG00000092009	16.3447	-0.113792	0.506303	-0.224752	0.822173	0.999853	Myh15
ENSMUSG00000089698	16.6538	-0.207694	0.607216	-0.342044	0.732318	0.999853	Gm2541
ENSMUSG00000055809	16.8624	-0.813376	0.52532	-1.54835	0.121539	0.999853	Dnaaf3
ENSMUSG00000028457	17.253	-0.683911	0.443156	-1.54327	0.122765	0.999853	Atp8b5
ENSMUSG00000082029	15.6594	0.96841	0.608513	1.59144	0.111512	0.999853	H3f3c
ENSMUSG00000085207	17.0802	-0.668673	0.45751	-1.46155	0.143865	0.999853	Gm11767
ENSMUSG00000038037	16.8186	-0.730629	0.561164	-1.30199	0.192921	0.999853	Socs1
ENSMUSG00000034923	17.0936	-0.0110739	0.498254	-0.0222254	0.982268	0.999853	Ly6g6f
ENSMUSG00000031896	17.1879	-0.118353	0.408644	-0.289622	0.772105	0.999853	Ctrl
ENSMUSG00000078931	17.1091	0.555326	0.49152	1.12981	0.258555	0.999853	Pdf
ENSMUSG00000097523	16.6222	-0.0456807	0.433056	-0.105485	0.915991	0.999853	1700022N22Rik
ENSMUSG00000087652	17.5206	-0.161909	0.451039	-0.358969	0.719618	0.999853	Gm15918
ENSMUSG00000111696	17.7384	-0.060525	0.818665	-0.0739314	0.941065	0.999853	Gm47932
ENSMUSG00000055632	16.6199	0.0203891	0.569328	0.0358126	0.971432	0.999853	Hmcn2
ENSMUSG00000031997	17.7213	-0.487963	0.442471	-1.10281	0.270108	0.999853	Trpc6
ENSMUSG00000054453	16.7615	0.0668186	0.563011	0.118681	0.905528	0.999853	Sytl5
ENSMUSG00000042549	16.2369	0.152319	0.493419	0.308702	0.757549	0.999853	Map2k3os
ENSMUSG00000078773	16.7041	0.104582	0.539627	0.193805	0.846329	0.999853	Rad54b
ENSMUSG00000052403	17.2428	-0.948871	0.498575	-1.90317	0.0570188	0.999853	Fcnaos
ENSMUSG00000106940	17.4655	-0.478729	0.491958	-0.973109	0.330499	0.999853	Gm42930
ENSMUSG00000108847	16.7786	0.366248	0.480683	0.761932	0.446101	0.999853	B830042I05Rik
ENSMUSG00000105434	17.6789	-0.607931	0.409274	-1.48539	0.137441	0.999853	Gm43359
ENSMUSG00000116836	17.7521	-0.580969	0.553641	-1.04936	0.294012	0.999853	AC134560.3
ENSMUSG00000085397	17.8439	-0.452262	0.550968	-0.82085	0.411731	0.999853	Gm13524
ENSMUSG00000069378	16.3433	-0.395348	0.565138	-0.69956	0.484202	0.999853	Prdm6
ENSMUSG00000024986	16.8227	0.237225	0.560563	0.423191	0.672156	0.999853	Hhex
ENSMUSG00000032092	16.1697	0.562655	0.665485	0.845482	0.397842	0.999853	Mpzl2
ENSMUSG00000114025	17.1956	0.203599	0.414105	0.49166	0.62296	0.999853	Gm49331
ENSMUSG00000059203	15.9868	0.51332	0.582908	0.880619	0.378524	0.999853	Il1rapl2
ENSMUSG00000060019	16.4999	0.773929	0.509397	1.51931	0.128686	0.999853	Gm10073
ENSMUSG00000104988	17.1904	-0.328321	0.509167	-0.64482	0.519044	0.999853	Gm43622
ENSMUSG00000020857	17.0964	-0.0999566	0.537953	-0.185809	0.852594	0.999853	Nme2
ENSMUSG00000022900	16.9853	-0.0270747	0.463115	-0.0584621	0.953381	0.999853	Ildr1
ENSMUSG00000085251	16.6957	-0.124171	0.560174	-0.221665	0.824574	0.999853	Gm12326
ENSMUSG00000110683	17.315	-0.169196	0.446058	-0.379314	0.704455	0.999853	Gm45874
ENSMUSG00000086942	17.8723	-0.378075	0.484706	-0.780008	0.435386	0.999853	Gm15489
ENSMUSG00000117172	17.1224	0.222648	0.51673	0.430878	0.666557	0.999853	A230051N06Rik
ENSMUSG00000031142	17.5707	0.392188	0.560455	0.699767	0.484073	0.999853	Cacna1f
ENSMUSG00000105408	16.5252	0.465724	0.535248	0.870108	0.384242	0.999853	Gm7285
ENSMUSG00000090564	16.3149	0.653447	0.440307	1.48407	0.13779	0.999853	A430057M04Rik
ENSMUSG00000085568	17.325	0.256058	0.462642	0.55347	0.579942	0.999853	Gm14858
ENSMUSG00000045826	17.4972	-0.180214	0.592603	-0.304106	0.761047	0.999853	Ptprcap
ENSMUSG00000110791	17.1062	-0.216556	0.413708	-0.52345	0.600661	0.999853	Gm47508
ENSMUSG00000095087	17.4812	0.0056651	0.476606	0.0118863	0.990516	0.999853	Gm25328
ENSMUSG00000115811	16.6947	0.141026	0.426971	0.330295	0.741177	0.999853	Gm41293
ENSMUSG00000081970	17.7154	0.107639	0.587262	0.183289	0.854571	0.999853	Gm16057
ENSMUSG00000019122	17.0133	0.142951	0.448938	0.318421	0.750166	0.999853	Ccl9
ENSMUSG00000046593	17.083	-0.44145	0.582781	-0.757488	0.448758	0.999853	Tmem215
ENSMUSG00000072620	17.1047	0.609312	0.606271	1.00502	0.314889	0.999853	Slfn2
ENSMUSG00000026196	16.9727	-0.303175	0.571763	-0.530247	0.595941	0.999853	Bard1
ENSMUSG00000086245	16.8906	0.272517	0.439642	0.619862	0.535349	0.999853	Gm16170
ENSMUSG00000097535	16.1052	0.201905	0.749539	0.269372	0.787643	0.999853	Gm26592
ENSMUSG00000032344	16.7531	0.23729	0.539754	0.439627	0.660207	0.999853	Mb21d1
ENSMUSG00000042106	16.794	0.479569	0.568643	0.843357	0.399029	0.999853	Inka1
ENSMUSG00000030589	17.1827	-0.51486	0.42241	-1.21886	0.222896	0.999853	Rasgrp4
ENSMUSG00000066807	17.2953	-0.488777	0.436377	-1.12008	0.26268	0.999853	Gm10179
ENSMUSG00000019945	17.3164	-0.136279	0.388348	-0.350919	0.725649	0.999853	Cabcoco1
ENSMUSG00000045165	17.1985	-0.377677	0.477675	-0.790658	0.429143	0.999853	AI467606
ENSMUSG00000019767	17.7676	-0.495802	0.448971	-1.10431	0.26946	0.999853	Ccdc170
ENSMUSG00000099384	17.2556	0.34394	0.430629	0.798692	0.424469	0.999853	1700110C19Rik
ENSMUSG00000089679	16.2882	0.922764	0.520354	1.77334	0.0761724	0.999853	Gm16299
ENSMUSG00000110120	16.8266	0.55647	0.420709	1.32269	0.185937	0.999853	Gm45251
ENSMUSG00000109945	16.9639	-0.00121319	0.537386	-0.00225758	0.998199	0.999853	Gm45601
ENSMUSG00000040434	17.2311	-0.316892	0.521294	-0.607896	0.543257	0.999853	Large2
ENSMUSG00000078439	18.002	-0.393339	0.648063	-0.606945	0.543887	0.999853	Smim24
ENSMUSG00000021118	17.3463	0.335636	0.479011	0.700685	0.4835	0.999853	Plek2
ENSMUSG00000028836	16.8697	0.0909481	0.543541	0.167325	0.867114	0.999853	Slc30a2
ENSMUSG00000105509	17.4214	-0.704418	0.483625	-1.45654	0.145244	0.999853	C130013H08Rik
ENSMUSG00000104713	17.3698	0.155981	0.419889	0.371482	0.710279	0.999853	Gbp6
ENSMUSG00000074577	17.3904	-0.15794	0.438759	-0.359969	0.71887	0.999853	Ripor3
ENSMUSG00000097638	15.7085	0.344306	0.818409	0.420702	0.673973	0.999853	Carlr
ENSMUSG00000112112	17.2464	0.362499	0.597703	0.606487	0.544191	0.999853	Gm48508
ENSMUSG00000033450	17.3283	0.297467	0.423397	0.702573	0.482322	0.999853	Tagap
ENSMUSG00000077637	18.0773	-0.616545	0.557668	-1.10558	0.26891	0.999853	Gm22771
ENSMUSG00000097309	17.2431	0.270027	0.441359	0.611808	0.540665	0.999853	Gm17249
ENSMUSG00000023949	17.9565	-0.721667	0.487679	-1.4798	0.138927	0.999853	Tcte1
ENSMUSG00000072972	18.0093	-0.658215	0.431824	-1.52427	0.127442	0.999853	Adam4
ENSMUSG00000086453	17.6537	-0.136169	0.4363	-0.312099	0.754966	0.999853	Gm11457
ENSMUSG00000112790	17.9319	0.217646	0.496066	0.438744	0.660847	0.999853	Gm33378
ENSMUSG00000112690	16.1066	0.235033	0.778951	0.30173	0.762858	0.999853	Gm2446
ENSMUSG00000117013	17.2171	0.0576609	0.437166	0.131897	0.895066	0.999853	CAAA01141682.1
ENSMUSG00000109984	17.7342	-0.617461	0.446775	-1.38204	0.166959	0.999853	Gm38948
ENSMUSG00000103115	17.891	-0.396636	0.615749	-0.644152	0.519477	0.999853	Gm37584
ENSMUSG00000108353	16.9834	1.09388	0.536745	2.038	0.0415503	0.999853	Gm45205
ENSMUSG00000102151	18.5697	-0.223438	0.740116	-0.301896	0.762731	0.999853	Gm37472
ENSMUSG00000109452	18.3852	-0.233078	0.565525	-0.412144	0.680234	0.999853	Gm44530
ENSMUSG00000003477	18.0971	-1.37917	0.67632	-2.03922	0.0414281	0.999853	Inmt
ENSMUSG00000050623	17.4128	0.163347	0.467373	0.3495	0.726714	0.999853	Catsperz
ENSMUSG00000049929	17.362	-0.296047	0.442118	-0.669611	0.503106	0.999853	Lpar4
ENSMUSG00000020057	17.3163	0.17133	0.524434	0.326695	0.743899	0.999853	Dram1
ENSMUSG00000078721	17.897	-0.223312	0.435213	-0.51311	0.607874	0.999853	Fam205a1
ENSMUSG00000108543	17.692	-0.115516	0.581368	-0.198697	0.8425	0.999853	Gm44735
ENSMUSG00000109428	16.9254	0.738994	0.493483	1.4975	0.134262	0.999853	Gm45698
ENSMUSG00000025787	17.2727	0.370932	0.454116	0.816823	0.41403	0.999853	Tgm4
ENSMUSG00000103984	17.8429	0.312028	0.537554	0.580458	0.561606	0.999853	Gm37447
ENSMUSG00000035455	17.4737	0.395307	0.458467	0.862237	0.388557	0.999853	Fignl1
ENSMUSG00000050747	18.075	-0.0671364	0.475585	-0.141166	0.887739	0.999853	Trim15
ENSMUSG00000103520	17.5642	0.167402	0.523315	0.319888	0.749053	0.999853	1110025M09Rik
ENSMUSG00000085403	17.7121	-0.0162335	0.540529	-0.0300326	0.976041	0.999853	Gm13068
ENSMUSG00000102863	17.9652	-0.610948	0.427271	-1.42989	0.15275	0.999853	Gm37639
ENSMUSG00000096596	17.1248	-0.0935793	0.64576	-0.144913	0.884779	0.999853	Gm10591
ENSMUSG00000087536	16.8322	0.403647	0.442986	0.911196	0.362192	0.999853	Gm14246
ENSMUSG00000103466	18.1505	-0.713242	0.503014	-1.41794	0.156209	0.999853	Gm37247
ENSMUSG00000115191	18.2632	-0.0903724	0.619789	-0.145812	0.88407	0.999853	Gm49071
ENSMUSG00000039616	17.9723	-0.55471	0.415631	-1.33462	0.182	0.999853	Mocos
ENSMUSG00000029335	16.1997	0.219992	0.765976	0.287205	0.773955	0.999853	Bmp3
ENSMUSG00000036330	17.0353	-0.249371	0.675907	-0.368942	0.712171	0.999853	Slc18a1
ENSMUSG00000067147	17.7765	-0.535531	0.472494	-1.13341	0.257041	0.999853	Rpl7a-ps11
ENSMUSG00000106691	17.8165	-0.807935	0.474499	-1.70271	0.0886219	0.999853	2700029L08Rik
ENSMUSG00000097165	16.7686	0.392355	0.527796	0.743385	0.457249	0.999853	2210008F06Rik
ENSMUSG00000116808	17.6779	-0.367296	0.427394	-0.859385	0.390128	0.999853	AC087898.4
ENSMUSG00000078160	17.6768	-0.0965169	0.393277	-0.245417	0.806133	0.999853	Gm16503
ENSMUSG00000105552	17.7183	-0.0390846	0.520766	-0.0750521	0.940173	0.999853	Gm19710
ENSMUSG00000105429	18.1225	-0.197282	0.486838	-0.405232	0.685307	0.999853	Gm43692
ENSMUSG00000085666	17.8035	-0.718747	0.526155	-1.36604	0.171927	0.999853	Gm9855
ENSMUSG00000083679	17.5758	-0.107969	0.425556	-0.253713	0.799718	0.999853	Gm12892
ENSMUSG00000108878	17.6442	0.354414	0.51893	0.68297	0.494626	0.999853	Gm49493
ENSMUSG00000105198	17.9187	-0.168276	0.53429	-0.314952	0.752798	0.999853	Gm42502
ENSMUSG00000117037	17.25	-0.00875948	0.449096	-0.0195047	0.984439	0.999853	CT010433.2
ENSMUSG00000086534	17.4108	-0.484231	0.478916	-1.0111	0.311969	0.999853	Gm16758
ENSMUSG00000104696	19.0323	-0.3085	0.714686	-0.431658	0.66599	0.999853	Gm42946
ENSMUSG00000056144	18.3433	-0.395965	0.568355	-0.696685	0.486	0.999853	Trim34a
ENSMUSG00000091744	16.8925	0.598524	0.619368	0.966347	0.333871	0.999853	Gm17732
ENSMUSG00000084862	18.8783	-0.199155	0.568531	-0.350298	0.726115	0.999853	Gm16278
ENSMUSG00000071392	17.2277	-0.0457756	0.521467	-0.0877822	0.93005	0.999853	Ect2l
ENSMUSG00000113529	18.637	-0.692477	0.531495	-1.30289	0.192614	0.999853	Gm47484
ENSMUSG00000114535	18.2036	-0.651255	0.482891	-1.34866	0.177447	0.999853	Gm47246
ENSMUSG00000074449	17.345	0.166738	0.496993	0.335494	0.737253	0.999853	Gm15319
ENSMUSG00000116795	17.6921	0.118223	0.466764	0.253283	0.80005	0.999853	AC154763.2
ENSMUSG00000040528	18.0241	-0.10217	0.481579	-0.212157	0.831985	0.999853	Milr1
ENSMUSG00000112000	17.4758	0.742891	0.421719	1.76158	0.0781406	0.999853	Gm47956
ENSMUSG00000108171	18.8385	-0.812949	0.553392	-1.46903	0.141825	0.999853	Gm43915
ENSMUSG00000000031	18.0275	-0.475454	0.448897	-1.05916	0.289527	0.999853	H19
ENSMUSG00000026725	17.6685	-0.152053	0.459055	-0.33123	0.74047	0.999853	Tnn
ENSMUSG00000103309	17.6875	0.0425869	0.475557	0.0895516	0.928644	0.999853	BC037039
ENSMUSG00000021534	17.7889	-0.535166	0.511931	-1.04539	0.295845	0.999853	1700001L19Rik
ENSMUSG00000052848	16.9762	-0.0221415	0.806343	-0.0274592	0.978093	0.999853	C130026L21Rik
ENSMUSG00000079434	17.5315	0.00423803	0.515903	0.00821477	0.993446	0.999853	Neu2
ENSMUSG00000112627	17.5126	-0.0412309	0.435301	-0.0947181	0.924539	0.999853	4933412E12Rik
ENSMUSG00000085615	17.8515	-0.114399	0.413871	-0.276412	0.782231	0.999853	A330035P11Rik
ENSMUSG00000047965	17.3777	-0.310572	0.512396	-0.606118	0.544436	0.999853	Rpl9-ps7
ENSMUSG00000086240	18.1652	-0.133344	0.480937	-0.277258	0.781582	0.999853	Gm7846
ENSMUSG00000116534	17.8213	-0.39385	0.419485	-0.938891	0.347787	0.999853	AC124681.1
ENSMUSG00000097793	17.9688	0.23393	0.425262	0.550084	0.582262	0.999853	Gm17259
ENSMUSG00000085376	17.684	0.197545	0.411941	0.479546	0.63155	0.999853	Gm14508
ENSMUSG00000103735	18.2218	-0.101728	0.40096	-0.253712	0.799718	0.999853	Gm38317
ENSMUSG00000094707	17.3858	0.288505	0.465652	0.619572	0.535539	0.999853	A830019P07Rik
ENSMUSG00000087519	17.514	0.371193	0.434854	0.853604	0.393324	0.999853	AV039307
ENSMUSG00000001076	17.7501	-0.680775	0.796514	-0.854694	0.392721	0.999853	C1ql4
ENSMUSG00000082383	18.4942	-0.171866	0.541928	-0.317139	0.751138	0.999853	Gm9670
ENSMUSG00000101320	17.9052	-0.178585	0.477727	-0.373823	0.708536	0.999853	Gm28529
ENSMUSG00000091881	17.6643	0.385141	0.41551	0.926912	0.353972	0.999853	Gm17146
ENSMUSG00000085637	17.5003	-0.472978	0.501577	-0.942981	0.345691	0.999853	1700048M11Rik
ENSMUSG00000029671	18.089	-0.13425	0.47457	-0.282888	0.777263	0.999853	Wnt16
ENSMUSG00000104860	18.5467	-0.379421	0.494783	-0.766843	0.443175	0.999853	Gm42510
ENSMUSG00000074063	17.1867	1.44309	0.677717	2.12935	0.0332257	0.999853	Osgin1
ENSMUSG00000062248	17.0933	0.0945388	0.553222	0.170888	0.864312	0.999853	Cks2
ENSMUSG00000051984	17.0889	0.569023	0.51508	1.10473	0.269278	0.999853	Sec31b
ENSMUSG00000036923	18.0355	-0.370729	0.399402	-0.92821	0.353298	0.999853	Stox1
ENSMUSG00000115591	17.8667	0.0899002	0.486127	0.184931	0.853283	0.999853	Gm31282
ENSMUSG00000064208	17.7682	0.295568	0.457102	0.646612	0.517883	0.999853	Gm10145
ENSMUSG00000047515	17.1506	0.639114	0.556329	1.14881	0.250636	0.999853	BC049715
ENSMUSG00000106229	18.7742	-0.751358	0.474797	-1.58248	0.11354	0.999853	Gm19409
ENSMUSG00000057132	18.1935	0.206892	0.405676	0.509993	0.610056	0.999853	Rpgrip1
ENSMUSG00000047115	16.9659	0.857165	0.445179	1.92544	0.0541745	0.999853	Fam221a
ENSMUSG00000113669	18.6215	-0.776574	0.468351	-1.6581	0.097297	0.999853	Gm36723
ENSMUSG00000086015	17.2887	0.908329	0.496152	1.83075	0.0671384	0.999853	4833417C18Rik
ENSMUSG00000065883	18.7957	-0.438666	0.504157	-0.870098	0.384247	0.999853	Gm22865
ENSMUSG00000106244	19.2035	-0.36281	0.598875	-0.605819	0.544635	0.999853	Gm43046
ENSMUSG00000026637	17.9941	-0.173112	0.420792	-0.411396	0.680782	0.999853	Traf5
ENSMUSG00000042567	18.3273	-0.339921	0.470895	-0.721862	0.470379	0.999853	Nek10
ENSMUSG00000085151	17.117	0.858946	0.467563	1.83707	0.0661997	0.999853	1110018N20Rik
ENSMUSG00000022901	17.6276	0.197469	0.519314	0.38025	0.70376	0.999853	Cd86
ENSMUSG00000082674	18.0796	0.339655	0.432876	0.784649	0.432659	0.999853	Gm11914
ENSMUSG00000086328	16.9187	0.23739	0.808393	0.293657	0.76902	0.999853	2700033N17Rik
ENSMUSG00000059645	16.5394	0.426879	0.707422	0.603428	0.546224	0.999853	Gm7361
ENSMUSG00000093553	18.1291	-0.253561	0.394038	-0.643495	0.519903	0.999853	Gm20633
ENSMUSG00000048416	17.8175	-0.35416	0.565847	-0.625894	0.531384	0.999853	Mlf1
ENSMUSG00000083853	18.2805	0.230174	0.443078	0.519488	0.60342	0.999853	Gm15696
ENSMUSG00000112368	18.1674	0.601106	0.525043	1.14487	0.252263	0.999853	Gm49376
ENSMUSG00000117255	17.6432	0.356181	0.557147	0.639295	0.522631	0.999853	AC140278.1
ENSMUSG00000109366	17.4257	0.151308	0.528363	0.286371	0.774594	0.999853	Gm44698
ENSMUSG00000010311	17.6625	0.159771	0.459142	0.347977	0.727858	0.999853	Optc
ENSMUSG00000022753	18.7286	0.00274692	0.44874	0.00612141	0.995116	0.999853	Tmem30c
ENSMUSG00000019102	17.3014	0.565073	0.46949	1.20359	0.228748	0.999853	Aldh3a1
ENSMUSG00000030324	18.4522	0.433092	0.473329	0.914991	0.360196	0.999853	Rho
ENSMUSG00000026117	17.5245	-0.261602	0.759157	-0.344596	0.730398	0.999853	Zap70
ENSMUSG00000115867	17.7906	-0.475657	0.532011	-0.894075	0.371282	0.999853	Gm17753
ENSMUSG00000032860	18.4582	-0.0559954	0.543501	-0.103027	0.917941	0.999853	P2ry2
ENSMUSG00000085957	17.5415	-0.29516	0.59992	-0.491999	0.62272	0.999853	Syna
ENSMUSG00000068101	17.9364	-0.505843	0.486539	-1.03968	0.29849	0.999853	Cenpm
ENSMUSG00000082935	17.8894	0.138158	0.476521	0.289931	0.771869	0.999853	Gm7658
ENSMUSG00000034311	17.7654	-0.347491	0.491719	-0.706687	0.479761	0.999853	Kif4
ENSMUSG00000038543	17.9074	-0.120005	0.453915	-0.264378	0.791489	0.999853	BC028528
ENSMUSG00000005705	18.7115	-0.330868	0.501288	-0.660036	0.509231	0.999853	Agrp
ENSMUSG00000103663	19.0271	-0.347089	0.462148	-0.751034	0.452632	0.999853	2900037B21Rik
ENSMUSG00000030730	18.42	-0.251237	0.472014	-0.532266	0.594542	0.999853	Atp2a1
ENSMUSG00000113656	18.5912	0.369105	0.43891	0.840958	0.400371	0.999853	Gm47370
ENSMUSG00000106446	18.6022	-0.391188	0.460134	-0.850163	0.395235	0.999853	Gm42970
ENSMUSG00000097889	18.8051	-0.350019	0.428447	-0.816948	0.413958	0.999853	Gm26541
ENSMUSG00000043289	18.787	0.354526	0.5524	0.641792	0.521008	0.999853	Mei4
ENSMUSG00000073413	18.0805	0.539726	0.509271	1.0598	0.289235	0.999853	Ly6g6d
ENSMUSG00000104244	18.1236	0.0670553	0.500838	0.133886	0.893493	0.999853	2900018N21Rik
ENSMUSG00000104562	19.1043	-0.41002	0.523635	-0.783026	0.433612	0.999853	Gm42767
ENSMUSG00000115008	18.2542	-1.20656	0.59949	-2.01264	0.0441528	0.999853	4933429O19Rik
ENSMUSG00000040061	18.5728	-0.712895	0.441034	-1.61642	0.106004	0.999853	Plcb2
ENSMUSG00000078894	17.8871	0.190152	0.594684	0.319753	0.749156	0.999853	2210418O10Rik
ENSMUSG00000013707	18.5776	0.159467	0.505752	0.315307	0.752528	0.999853	Tnfaip8l2
ENSMUSG00000051727	18.0882	0.105841	0.445231	0.237721	0.812098	0.999853	Kctd14
ENSMUSG00000049526	17.2281	0.379258	0.647924	0.585344	0.558317	0.999853	Tmem202
ENSMUSG00000043913	18.3772	-0.325505	0.412667	-0.788785	0.430238	0.999853	Ccdc60
ENSMUSG00000084592	18.3643	0.672729	0.440687	1.52655	0.126873	0.999853	Mir1898
ENSMUSG00000015134	18.3612	0.736133	0.531161	1.38589	0.165779	0.999853	Aldh1a3
ENSMUSG00000105112	18.8039	-0.495157	0.57166	-0.866174	0.386395	0.999853	Gm42778
ENSMUSG00000116571	18.4923	-0.384567	0.524611	-0.733052	0.463526	0.999853	AC131800.1
ENSMUSG00000083816	18.2549	0.378546	0.400595	0.944959	0.34468	0.999853	Gm13033
ENSMUSG00000085054	17.5108	0.982514	0.540645	1.8173	0.0691709	0.999853	Gm15834
ENSMUSG00000104516	17.7578	0.484164	0.436348	1.10958	0.267179	0.999853	Gm9884
ENSMUSG00000056155	18.4678	0.256026	0.398987	0.641691	0.521074	0.999853	Nanos3
ENSMUSG00000056032	17.6878	1.46035	0.668333	2.18506	0.0288843	0.999853	BC018473
ENSMUSG00000054612	18.3549	0.194112	0.463775	0.418549	0.675546	0.999853	Mgmt
ENSMUSG00000003283	18.2458	0.0162691	0.394162	0.0412752	0.967077	0.999853	Hck
ENSMUSG00000090264	17.7098	0.361452	0.509548	0.709358	0.478102	0.999853	Eif4ebp3
ENSMUSG00000020649	18.8648	-0.368973	0.52352	-0.704793	0.480939	0.999853	Rrm2
ENSMUSG00000035298	18.5131	-0.474521	0.461936	-1.02725	0.304305	0.999853	Klhl35
ENSMUSG00000095545	18.5843	-0.481276	0.46945	-1.02519	0.305273	0.999853	Zfp969
ENSMUSG00000068335	18.966	-0.559018	0.39056	-1.43133	0.152337	0.999853	Dok1
ENSMUSG00000111877	18.0558	0.0913579	0.4641	0.196849	0.843945	0.999853	Gm6477
ENSMUSG00000086331	18.2499	-0.731644	0.531355	-1.37694	0.168531	0.999853	Gm16310
ENSMUSG00000098620	19.5953	-0.5572	0.550575	-1.01203	0.311523	0.999853	Gm27209
ENSMUSG00000097622	17.0693	0.365442	0.688728	0.530605	0.595693	0.999853	A330033J07Rik
ENSMUSG00000046223	16.6459	1.10451	0.75092	1.47088	0.141324	0.999853	Plaur
ENSMUSG00000109529	18.9221	-0.172486	0.476921	-0.361665	0.717602	0.999853	Gm44801
ENSMUSG00000026616	18.4807	0.0423694	0.489656	0.086529	0.931046	0.999853	Cr2
ENSMUSG00000092216	18.5503	-0.450168	0.498385	-0.903253	0.366392	0.999853	Gm19345
ENSMUSG00000108607	18.178	-0.0321153	0.495102	-0.0648661	0.948281	0.999853	Gm44646
ENSMUSG00000102713	18.1663	0.440244	0.465223	0.946309	0.343991	0.999853	Gm29994
ENSMUSG00000087306	18.8536	-0.121181	0.478129	-0.253448	0.799922	0.999853	A230004M16Rik
ENSMUSG00000095276	18.1846	0.42637	0.626412	0.680654	0.49609	0.999853	Gfy
ENSMUSG00000090523	18.9655	-0.12555	0.422753	-0.296981	0.766481	0.999853	Gypc
ENSMUSG00000070605	18.689	-0.469892	0.450319	-1.04347	0.296733	0.999853	Zfp992
ENSMUSG00000116793	19.0544	-0.431038	0.645198	-0.66807	0.504089	0.999853	AC161376.2
ENSMUSG00000019848	16.9723	0.342898	0.903375	0.379574	0.704261	0.999853	Popdc3
ENSMUSG00000113749	18.4177	-0.16482	0.437761	-0.376506	0.706541	0.999853	Mrto4-ps1
ENSMUSG00000046463	18.7803	-0.212009	0.524223	-0.404425	0.6859	0.999853	5930403N24Rik
ENSMUSG00000043801	18.6577	-0.274827	0.512255	-0.536504	0.59161	0.999853	Oaz1-ps
ENSMUSG00000085024	18.5986	-0.0613114	0.461858	-0.13275	0.894391	0.999853	C230035I16Rik
ENSMUSG00000112828	19.3346	-0.375406	0.4504	-0.833493	0.404567	0.999853	Gm48495
ENSMUSG00000068794	17.5324	0.41687	0.588066	0.708883	0.478397	0.999853	Col28a1
ENSMUSG00000086804	18.5036	0.301111	0.443596	0.678795	0.497268	0.999853	Gm43154
ENSMUSG00000053038	17.7535	0.203047	0.494207	0.410854	0.681179	0.999853	Gm6180
ENSMUSG00000085311	19.0272	-0.190107	0.396789	-0.479112	0.631859	0.999853	Gm15445
ENSMUSG00000079559	19.1478	0.0160933	0.605786	0.026566	0.978806	0.999853	Colca2
ENSMUSG00000000318	18.4436	0.113973	0.468851	0.243091	0.807935	0.999853	Clec10a
ENSMUSG00000052392	17.8603	0.409728	0.49796	0.822813	0.410614	0.999853	Acot4
ENSMUSG00000049404	19.0604	-0.28546	0.412962	-0.691249	0.489409	0.999853	Rarres1
ENSMUSG00000024371	17.8515	0.692603	0.456218	1.51814	0.12898	0.999853	C2
ENSMUSG00000059743	18.76	0.120806	0.428239	0.282101	0.777866	0.999853	Fdps
ENSMUSG00000097311	18.1946	0.230896	0.557174	0.414406	0.678577	0.999853	Gm26871
ENSMUSG00000024027	17.1228	0.783481	0.587518	1.33355	0.182353	0.999853	Glp1r
ENSMUSG00000106746	18.7894	-0.274126	0.41039	-0.667965	0.504156	0.999853	2900064F13Rik
ENSMUSG00000074060	18.8649	0.211959	0.52741	0.401886	0.687768	0.999853	Fbxw15
ENSMUSG00000037466	18.577	-0.31222	0.42909	-0.727632	0.466839	0.999853	Tedc1
ENSMUSG00000045179	18.672	-0.679839	0.512202	-1.32729	0.184414	0.999853	Sox3
ENSMUSG00000100005	18.4757	-0.257289	0.433935	-0.592921	0.553234	0.999853	B130024G19Rik
ENSMUSG00000110408	18.989	0.0045943	0.40534	0.0113344	0.990957	0.999853	Gm45881
ENSMUSG00000073485	19.2285	0.478317	0.489886	0.976385	0.328874	0.999853	H3f3aos
ENSMUSG00000031893	19.2476	-0.72291	0.397711	-1.81768	0.0691133	0.999853	Tsnaxip1
ENSMUSG00000022429	17.8386	0.502437	0.488539	1.02845	0.303739	0.999853	Dmc1
ENSMUSG00000078879	18.3585	0.398409	0.749452	0.5316	0.595003	0.999853	Zfp973
ENSMUSG00000097234	19.7058	-0.359431	0.485287	-0.740657	0.458902	0.999853	Gm26518
ENSMUSG00000044362	19.0056	-0.325615	0.425225	-0.765746	0.443827	0.999853	Ccdc89
ENSMUSG00000117321	18.6705	0.0699793	0.453198	0.154412	0.877285	0.999853	AC119957.1
ENSMUSG00000032739	19.4955	-0.285967	0.51337	-0.557038	0.577501	0.999853	Pram1
ENSMUSG00000099104	19.4964	-0.777659	0.510089	-1.52456	0.12737	0.999853	Gm17087
ENSMUSG00000115852	18.7242	0.419567	0.684542	0.612917	0.539932	0.999853	AC169509.1
ENSMUSG00000108799	18.4766	0.29221	0.392383	0.744707	0.456449	0.999853	Glud-ps
ENSMUSG00000027070	18.5946	0.319361	0.595803	0.536018	0.591946	0.999853	Lrp2
ENSMUSG00000051136	18.3342	-0.489666	0.777133	-0.630093	0.528634	0.999853	Ghsr
ENSMUSG00000074796	18.4911	0.310249	0.460762	0.673339	0.500731	0.999853	Slc4a11
ENSMUSG00000041372	18.4743	0.408877	0.565681	0.722804	0.4698	0.999853	B4galnt3
ENSMUSG00000101860	18.5618	0.509235	0.411701	1.2369	0.216123	0.999853	Mindy4b-ps
ENSMUSG00000097296	18.5215	0.151375	0.407394	0.371569	0.710214	0.999853	Gm26532
ENSMUSG00000085363	19.6695	-0.112292	0.486162	-0.230976	0.817333	0.999853	Gm15478
ENSMUSG00000112847	19.0465	-0.0864501	0.405892	-0.212988	0.831336	0.999853	Gm47573
ENSMUSG00000021139	18.4465	0.204783	0.42172	0.48559	0.627258	0.999853	Gm20498
ENSMUSG00000104280	19.6213	0.235571	0.538767	0.437241	0.661937	0.999853	Rps2-ps11
ENSMUSG00000102891	19.3084	-0.202923	0.489527	-0.414529	0.678487	0.999853	Gm19114
ENSMUSG00000086029	19.0346	0.0970564	0.471108	0.206017	0.836777	0.999853	Pax6os1
ENSMUSG00000026922	18.4309	0.0493977	0.456855	0.108125	0.913896	0.999853	Agpat2
ENSMUSG00000029177	19.8012	-0.875917	0.40517	-2.16185	0.0306296	0.999853	Cenpa
ENSMUSG00000035273	17.4156	0.82011	0.707164	1.15972	0.246164	0.999853	Hpse
ENSMUSG00000053111	18.3852	-0.0788755	0.505093	-0.15616	0.875907	0.999853	Fank1
ENSMUSG00000094152	19.1248	-0.170762	0.518162	-0.329553	0.741737	0.999853	Slc6a16
ENSMUSG00000020420	18.9115	0.114671	0.513643	0.223252	0.82334	0.999853	Zfp607a
ENSMUSG00000079017	19.1605	-0.596491	0.418465	-1.42543	0.154034	0.999853	Ifi27l2a
ENSMUSG00000106275	18.4997	0.221163	0.510979	0.432823	0.665144	0.999853	Gm42495
ENSMUSG00000108923	18.1042	0.489873	0.640029	0.765392	0.444038	0.999853	4933431C10Rik
ENSMUSG00000040751	19.0029	0.0160613	0.434608	0.0369558	0.97052	0.999853	Lat2
ENSMUSG00000110649	18.8763	0.0295343	0.438445	0.0673614	0.946294	0.999853	Gm40466
ENSMUSG00000054385	19.1212	-0.680651	0.50218	-1.35539	0.175293	0.999853	Ceacam2
ENSMUSG00000020377	18.8559	-0.697693	0.492981	-1.41525	0.156994	0.999853	Ltc4s
ENSMUSG00000101439	18.9259	0.672442	0.474995	1.41568	0.156869	0.999853	Gm336
ENSMUSG00000086237	18.9305	0.427662	0.403181	1.06072	0.288818	0.999853	Gm15591
ENSMUSG00000033715	18.8763	-0.334721	0.49559	-0.675398	0.499423	0.999853	Akr1c14
ENSMUSG00000063354	18.8905	-0.830407	0.5085	-1.63305	0.102458	0.999853	Slc39a4
ENSMUSG00000036594	19.036	-0.638363	0.4716	-1.35361	0.17586	0.999853	H2-Aa
ENSMUSG00000097615	18.7446	-0.456176	0.462412	-0.986514	0.323881	0.999853	Gm2061
ENSMUSG00000033633	18.3619	-0.67234	0.850635	-0.790398	0.429296	0.999853	Clec18a
ENSMUSG00000007279	18.993	-0.140843	0.42172	-0.333972	0.738401	0.999853	Scube2
ENSMUSG00000113515	18.9884	-0.291216	0.414176	-0.70312	0.481981	0.999853	Gm29675
ENSMUSG00000031861	18.7405	0.0620303	0.493596	0.12567	0.899993	0.999853	Lpar2
ENSMUSG00000056411	18.0661	0.645797	0.43049	1.50014	0.133577	0.999853	Gm12500
ENSMUSG00000097240	18.6864	0.221478	0.488347	0.453525	0.650171	0.999853	Gm26614
ENSMUSG00000025701	18.7404	-0.0973365	0.456025	-0.213446	0.830979	0.999853	Alox5
ENSMUSG00000100475	18.4808	-0.101776	0.530513	-0.191845	0.847864	0.999853	Gm29543
ENSMUSG00000112410	18.932	-0.151565	0.422245	-0.35895	0.719632	0.999853	B230217J21Rik
ENSMUSG00000097869	19.2734	0.307556	0.502605	0.611924	0.540588	0.999853	C230021G24Rik
ENSMUSG00000086464	19.3903	-0.154425	0.422148	-0.365807	0.714509	0.999853	Gm15835
ENSMUSG00000102570	20.1334	-0.742914	0.440046	-1.68826	0.0913608	0.999853	Gm37968
ENSMUSG00000106612	19.8325	-0.69825	0.404228	-1.72737	0.0841018	0.999853	Gm43750
ENSMUSG00000035458	17.7828	0.792843	0.500332	1.58463	0.11305	0.999853	Tnni3
ENSMUSG00000109709	19.9756	-0.471083	0.48782	-0.96569	0.334199	0.999853	Gm45290
ENSMUSG00000061802	20.4066	-1.08649	0.530546	-2.04788	0.0405716	0.999853	Armc4
ENSMUSG00000105946	19.8901	-0.461073	0.490433	-0.940134	0.347149	0.999853	Gm43776
ENSMUSG00000112150	19.363	0.0505207	0.431071	0.117198	0.906703	0.999853	9530018F02Rik
ENSMUSG00000105454	20.5754	-0.906623	0.554312	-1.63558	0.101927	0.999853	Gm43830
ENSMUSG00000103540	20.2249	-0.336906	0.629365	-0.53531	0.592435	0.999853	Gm37668
ENSMUSG00000009092	19.7818	-0.951971	0.436022	-2.18331	0.0290129	0.999853	Derl3
ENSMUSG00000116766	19.5317	-0.592013	0.40307	-1.46876	0.141898	0.999853	AC171205.1
ENSMUSG00000113255	19.5581	-0.318278	0.519839	-0.612262	0.540364	0.999853	Tes3-ps
ENSMUSG00000071078	19.7456	-0.19914	0.417961	-0.476456	0.63375	0.999853	Nr2c2ap
ENSMUSG00000083773	18.5152	0.233485	0.466889	0.500087	0.617014	0.999853	Gm13394
ENSMUSG00000102997	17.7007	1.08491	0.580712	1.86824	0.0617293	0.999853	Gm17244
ENSMUSG00000085218	19.545	0.250328	0.506906	0.493835	0.621423	0.999853	BB218582
ENSMUSG00000111664	18.3458	0.992429	0.504092	1.96875	0.0489823	0.999853	Gm48865
ENSMUSG00000114515	19.4996	0.166493	0.495158	0.336242	0.736688	0.999853	Aldoa
ENSMUSG00000112947	19.7753	-0.585054	0.544325	-1.07483	0.282453	0.999853	Gm47493
ENSMUSG00000102407	20.0413	-0.621831	0.405201	-1.53462	0.124876	0.999853	Gm37862
ENSMUSG00000073154	18.5823	0.0292543	0.538341	0.0543416	0.956663	0.999853	9330158H04Rik
ENSMUSG00000052496	18.8297	0.196082	0.500444	0.391816	0.695194	0.999853	Pkdrej
ENSMUSG00000037418	18.6674	0.345649	0.472336	0.731786	0.464299	0.999853	Best1
ENSMUSG00000022768	19.5382	-0.192939	0.515939	-0.373957	0.708436	0.999853	Ccdc116
ENSMUSG00000104284	19.9396	-0.693807	0.486759	-1.42536	0.154053	0.999853	Gm10862
ENSMUSG00000104761	20.2031	-0.592032	0.446427	-1.32616	0.184788	0.999853	Gm43511
ENSMUSG00000109031	19.3699	0.651672	0.448174	1.45406	0.14593	0.999853	Gm45201
ENSMUSG00000037738	18.9016	-0.0247877	0.551611	-0.0449368	0.964158	0.999853	Nek5
ENSMUSG00000103804	19.5176	0.772444	0.49304	1.56669	0.117186	0.999853	Gm37062
ENSMUSG00000116145	18.6457	0.454131	0.466519	0.973445	0.330332	0.999853	5730521K06Rik
ENSMUSG00000110087	19.5035	0.360824	0.532343	0.677804	0.497896	0.999853	Gm45309
ENSMUSG00000026407	20.2844	0.307688	0.659331	0.466667	0.640738	0.999853	Cacna1s
ENSMUSG00000031549	18.1449	0.125889	0.726999	0.173163	0.862523	0.999853	Ido2
ENSMUSG00000074345	18.5561	0.432916	0.608142	0.711866	0.476548	0.999853	Tnfaip8l3
ENSMUSG00000079022	18.1411	0.339024	0.552355	0.613779	0.539361	0.999853	Col22a1
ENSMUSG00000035580	18.2879	0.293182	0.651531	0.44999	0.652717	0.999853	Kcnh8
ENSMUSG00000045328	19.5964	0.0523986	0.453803	0.115465	0.908076	0.999853	Cenpe
ENSMUSG00000063953	19.7538	-0.125054	0.395888	-0.315882	0.752092	0.999853	Amd2
ENSMUSG00000101655	19.0886	0.353293	0.428526	0.824439	0.40969	0.999853	2310040G24Rik
ENSMUSG00000031662	19.5383	0.0344215	0.403774	0.0852496	0.932063	0.999853	Snx20
ENSMUSG00000114362	18.9192	0.407149	0.420153	0.969049	0.332521	0.999853	4933433G19Rik
ENSMUSG00000087115	19.8187	-0.297422	0.466582	-0.637448	0.523833	0.999853	Pcsk2os2
ENSMUSG00000087200	19.7214	-0.763118	0.450119	-1.69537	0.0900055	0.999853	Lrp8os3
ENSMUSG00000110221	19.4315	-0.521837	0.440165	-1.18555	0.235801	0.999853	Gm36210
ENSMUSG00000102461	20.4505	-0.83757	0.65841	-1.27211	0.203334	0.999853	Gm37166
ENSMUSG00000020072	19.2092	0.214351	0.445904	0.480712	0.630721	0.999853	Pbld2
ENSMUSG00000046999	19.6792	-0.714926	0.68958	-1.03676	0.299849	0.999853	1110032F04Rik
ENSMUSG00000058620	20.6521	-0.522172	0.551174	-0.947381	0.343445	0.999853	Adra2b
ENSMUSG00000112980	18.9771	0.158957	0.528714	0.300649	0.763682	0.999853	D430020J02Rik
ENSMUSG00000069743	18.852	0.35218	0.437219	0.805502	0.42053	0.999853	Zfp820
ENSMUSG00000087466	18.9157	0.722916	0.423823	1.7057	0.0880638	0.999853	A330041J22Rik
ENSMUSG00000039878	20.4272	-0.74786	0.436436	-1.71356	0.0866092	0.999853	Slc39a5
ENSMUSG00000044006	19.6053	-1.06429	0.572387	-1.85938	0.062973	0.999853	Cilp2
ENSMUSG00000081113	18.6801	0.385877	0.439175	0.87864	0.379596	0.999853	Gm7308
ENSMUSG00000054320	19.6469	0.0861169	0.450767	0.191045	0.84849	0.999853	Lrrc36
ENSMUSG00000019320	19.1679	-0.13017	0.456055	-0.285426	0.775318	0.999853	Noxo1
ENSMUSG00000086683	19.9846	-0.601813	0.437578	-1.37533	0.16903	0.999853	Gm12867
ENSMUSG00000111082	19.4257	0.294214	0.490823	0.599431	0.548885	0.999853	Gm30934
ENSMUSG00000117263	20.0453	-0.67402	0.558921	-1.20593	0.227844	0.999853	AC132460.3
ENSMUSG00000097760	19.1576	0.328791	0.488423	0.673169	0.50084	0.999853	6030442K20Rik
ENSMUSG00000040367	20.3829	-0.307096	0.616265	-0.498318	0.61826	0.999853	Lrrd1
ENSMUSG00000092988	20.4059	-0.635593	0.546034	-1.16402	0.244417	0.999853	Mir3093
ENSMUSG00000064179	18.7257	0.077122	0.621548	0.12408	0.901252	0.999853	Tnnt1
ENSMUSG00000014030	19.2341	-0.369016	0.714129	-0.516736	0.60534	0.999853	Pax5
ENSMUSG00000049676	20.2689	-0.113506	0.486077	-0.233515	0.815361	0.999853	Catsperg1
ENSMUSG00000097494	20.1424	0.0439474	0.503889	0.0872163	0.9305	0.999853	4933406C10Rik
ENSMUSG00000072407	20.139	-0.117266	0.508959	-0.230405	0.817777	0.999853	Gm6419
ENSMUSG00000108655	19.5823	0.0183987	0.494636	0.0371964	0.970328	0.999853	Gm44949
ENSMUSG00000090173	18.4018	0.578769	0.584481	0.990227	0.322063	0.999853	Fbxw10
ENSMUSG00000097414	20.0903	-0.0377898	0.432392	-0.087397	0.930356	0.999853	B130046B21Rik
ENSMUSG00000048373	17.7977	1.08842	0.596369	1.82508	0.0679891	0.999853	Fgfbp1
ENSMUSG00000081339	20.0609	-0.384011	0.399352	-0.961586	0.336258	0.999853	Gm16044
ENSMUSG00000024910	20.1697	-0.68872	0.60665	-1.13528	0.256256	0.999853	Ctsw
ENSMUSG00000037708	19.2277	0.239899	0.448134	0.535328	0.592423	0.999853	Spag6
ENSMUSG00000046456	20.1666	-0.433765	0.45431	-0.954778	0.33969	0.999853	Tmem150b
ENSMUSG00000004988	20.0865	-0.360657	0.445702	-0.809188	0.418407	0.999853	Fxyd4
ENSMUSG00000090256	19.7447	-0.00699466	0.497029	-0.0140729	0.988772	0.999853	Alms1-ps1
ENSMUSG00000064294	19.6977	-0.44458	0.403432	-1.10199	0.270464	0.999853	Aox3
ENSMUSG00000022371	19.3999	-0.368505	0.456686	-0.806912	0.419717	0.999853	Col14a1
ENSMUSG00000028860	20.177	-0.035202	0.537494	-0.0654929	0.947782	0.999853	Sytl1
ENSMUSG00000086181	19.2971	0.0691085	0.427103	0.161808	0.871457	0.999853	C230034O21Rik
ENSMUSG00000003436	19.3016	-0.130583	0.489831	-0.266588	0.789787	0.999853	Dll3
ENSMUSG00000032243	19.4131	0.0141357	0.431752	0.0327404	0.973882	0.999853	Itga11
ENSMUSG00000054702	20.338	-0.604847	0.535986	-1.12847	0.25912	0.999853	Ap1s3
ENSMUSG00000045655	20.4468	-0.969229	0.503322	-1.92566	0.0541462	0.999853	Fam216b
ENSMUSG00000106262	20.2346	0.0145192	0.548696	0.0264613	0.978889	0.999853	Gm43375
ENSMUSG00000105929	20.629	0.0365847	0.490703	0.0745557	0.940568	0.999853	Gm43693
ENSMUSG00000087721	20.172	0.51607	0.512094	1.00777	0.313567	0.999853	Gm26280
ENSMUSG00000075027	19.9532	-0.0849741	0.381469	-0.222755	0.823726	0.999853	4631405J19Rik
ENSMUSG00000022780	20.2418	-0.532418	0.574346	-0.926999	0.353927	0.999853	Meltf
ENSMUSG00000104672	20.2481	0.181572	0.489706	0.370777	0.710804	0.999853	Gm43665
ENSMUSG00000031803	19.2478	0.216523	0.493973	0.43833	0.661147	0.999853	B3gnt3
ENSMUSG00000019892	20.4374	-1.25689	0.596504	-2.10709	0.0351094	0.999853	Lrriq1
ENSMUSG00000049134	19.1827	0.337929	0.508289	0.664838	0.506154	0.999853	Nrap
ENSMUSG00000107859	19.6008	-0.232216	0.468729	-0.495418	0.620305	0.999853	Gm30731
ENSMUSG00000106961	19.9658	-0.795429	0.526212	-1.51161	0.130633	0.999853	Gm43128
ENSMUSG00000104727	20.438	-0.372002	0.665705	-0.55881	0.576292	0.999853	Gm42500
ENSMUSG00000022759	19.8248	-0.0972348	0.462805	-0.210099	0.833591	0.999853	Lrrc74b
ENSMUSG00000082675	19.2319	0.254227	0.495127	0.513458	0.607631	0.999853	Gm6382
ENSMUSG00000105445	20.7793	-0.373989	0.5091	-0.734607	0.462579	0.999853	Gm42972
ENSMUSG00000083284	19.4456	0.0897142	0.534222	0.167934	0.866635	0.999853	Gm13688
ENSMUSG00000083246	20.448	0.0206957	0.533783	0.0387718	0.969072	0.999853	Gm11839
ENSMUSG00000092286	19.1139	0.451799	0.571073	0.791141	0.428861	0.999853	Dtnbos
ENSMUSG00000104830	20.2853	-0.298271	0.465886	-0.640223	0.522027	0.999853	5830487J09Rik
ENSMUSG00000044056	19.9289	0.0662596	0.400346	0.165506	0.868546	0.999853	Efcab9
ENSMUSG00000015452	19.3432	0.56991	0.63327	0.899949	0.368148	0.999853	Ager
ENSMUSG00000096056	20.0406	0.223694	0.491457	0.455166	0.64899	0.999853	Gm21986
ENSMUSG00000116604	20.5786	0.585993	0.555164	1.05553	0.291183	0.999853	AC087898.2
ENSMUSG00000082561	19.8148	0.509521	0.479162	1.06336	0.287619	0.999853	Gm15580
ENSMUSG00000085604	20.6927	-0.330467	0.484974	-0.681412	0.495611	0.999853	Dhx58os
ENSMUSG00000069132	18.9781	0.0261014	1.58958	0.0164203	0.986899	0.999853	Nxph2
ENSMUSG00000045055	19.5912	-0.189239	0.506479	-0.373637	0.708674	0.999853	Rpsa-ps2
ENSMUSG00000024677	18.9157	0.946012	0.5308	1.78224	0.0747106	0.999853	Ms4a6b
ENSMUSG00000079608	19.6259	0.182325	0.564576	0.322941	0.74674	0.999853	Stard6
ENSMUSG00000085665	19.4708	0.48766	0.477336	1.02163	0.306957	0.999853	Gm12059
ENSMUSG00000028392	20.1623	-0.3969	0.540483	-0.734344	0.462739	0.999853	Bspry
ENSMUSG00000097326	19.7695	-0.129042	0.498449	-0.258888	0.795722	0.999853	A330048O09Rik
ENSMUSG00000026934	19.0911	0.331303	0.550016	0.602351	0.54694	0.999853	Lhx3
ENSMUSG00000036251	19.7698	0.697141	0.541906	1.28646	0.198282	0.999853	Trpm8
ENSMUSG00000084970	20.7001	-0.716473	0.429309	-1.6689	0.0951375	0.999853	1700060J05Rik
ENSMUSG00000105947	20.5272	0.150737	0.440939	0.341854	0.73246	0.999853	Gm43789
ENSMUSG00000032511	19.2303	-0.0432535	0.616013	-0.0702152	0.944022	0.999853	Scn5a
ENSMUSG00000032113	20.0934	-0.12356	0.409847	-0.301479	0.763049	0.999853	Chek1
ENSMUSG00000083692	20.1521	-0.319312	0.39391	-0.810623	0.417582	0.999853	Gm9575
ENSMUSG00000097207	20.0936	-0.0531554	0.44898	-0.118391	0.905758	0.999853	6030443J06Rik
ENSMUSG00000020992	19.6592	0.395329	0.456984	0.865082	0.386994	0.999853	4930512B01Rik
ENSMUSG00000105741	19.7452	0.0438343	0.4627	0.094736	0.924525	0.999853	C79130
ENSMUSG00000027456	19.6742	0.651623	0.446829	1.45833	0.14475	0.999853	Sdcbp2
ENSMUSG00000043164	20.4504	-0.406734	0.49813	-0.816522	0.414202	0.999853	Tmem212
ENSMUSG00000086108	21.1804	-0.669788	0.513525	-1.30429	0.192133	0.999853	Gm5602
ENSMUSG00000074981	20.3157	-0.521396	0.390189	-1.33626	0.181463	0.999853	Dcdc5
ENSMUSG00000039851	19.7975	0.37615	0.410804	0.915643	0.359854	0.999853	4932438H23Rik
ENSMUSG00000028558	19.9267	-0.108558	0.419922	-0.258519	0.796006	0.999853	Calr4
ENSMUSG00000043126	20.6619	-0.196673	0.436837	-0.450221	0.652551	0.999853	D830039M14Rik
ENSMUSG00000087373	19.0483	0.853274	0.523203	1.63087	0.102918	0.999853	Gm15892
ENSMUSG00000078519	20.1123	0.660669	0.396921	1.66448	0.0960161	0.999853	2310026L22Rik
ENSMUSG00000053889	20.5902	0.0231738	0.490877	0.0472089	0.962347	0.999853	Kirrel3os
ENSMUSG00000104286	20.1879	0.243154	0.553202	0.439539	0.660271	0.999853	Gm37457
ENSMUSG00000002944	19.069	0.434764	0.672892	0.646112	0.518207	0.999853	Cd36
ENSMUSG00000071636	19.088	0.158293	0.691135	0.229034	0.818843	0.999853	Rimbp3
ENSMUSG00000055069	19.582	0.502524	0.415948	1.20814	0.226993	0.999853	Rab39
ENSMUSG00000071317	19.4006	-0.0922231	0.54374	-0.169609	0.865318	0.999853	Bves
ENSMUSG00000074527	20.5799	-0.0834819	0.734094	-0.113721	0.909459	0.999853	Gm14296
ENSMUSG00000079507	19.4506	0.637854	0.464536	1.3731	0.169722	0.999853	H2-Q1
ENSMUSG00000031712	20.9829	-0.784947	0.357698	-2.19444	0.0282036	0.999853	Il15
ENSMUSG00000003484	19.5409	0.746729	0.485568	1.53785	0.124086	0.999853	Cyp4f18
ENSMUSG00000115756	20.443	0.0570467	0.503625	0.113272	0.909815	0.999853	Gm49519
ENSMUSG00000029720	20.2918	0.129946	0.498862	0.260485	0.79449	0.999853	Gm20605
ENSMUSG00000088139	19.9539	0.353854	0.495537	0.714082	0.475176	0.999853	Gm27343
ENSMUSG00000035394	20.8265	0.121204	0.477969	0.253581	0.79982	0.999853	Cfap53
ENSMUSG00000020913	20.8841	-0.506467	0.632701	-0.800485	0.42343	0.999853	Krt24
ENSMUSG00000092167	19.7093	0.297962	0.507426	0.587202	0.557068	0.999853	Gm3696
ENSMUSG00000074243	20.5733	-0.216851	0.51196	-0.42357	0.671879	0.999853	Gm10651
ENSMUSG00000082284	20.735	-0.173922	0.41774	-0.41634	0.677161	0.999853	H3f3a-ps1
ENSMUSG00000059406	20.9747	-0.263094	0.446481	-0.589261	0.555686	0.999853	Tmprss9
ENSMUSG00000078238	21.7435	-0.668275	0.541978	-1.23303	0.217565	0.999853	Gm12854
ENSMUSG00000090576	21.2421	0.053544	0.537499	0.0996169	0.920648	0.999853	Gm17055
ENSMUSG00000108551	20.7973	-0.210101	0.559679	-0.375396	0.707366	0.999853	Gm20274
ENSMUSG00000050808	20.6484	0.123054	0.416801	0.295235	0.767814	0.999853	Muc15
ENSMUSG00000079845	19.5966	-0.235789	0.923172	-0.255412	0.798405	0.999853	Xlr4a
ENSMUSG00000090070	20.2432	0.421197	0.427801	0.984564	0.324838	0.999853	Gm16577
ENSMUSG00000102652	20.6433	-0.0683192	0.520512	-0.131254	0.895575	0.999853	Gm37078
ENSMUSG00000108421	19.7475	0.0810225	0.444615	0.18223	0.855402	0.999853	Gm44718
ENSMUSG00000113927	20.8901	0.00307496	0.468725	0.00656026	0.994766	0.999853	5330409N07Rik
ENSMUSG00000031844	18.7272	0.55754	0.849542	0.656284	0.511642	0.999853	Hsd17b2
ENSMUSG00000027322	20.4172	0.0110554	0.402336	0.0274781	0.978078	0.999853	Siglec1
ENSMUSG00000020641	20.8787	-0.495531	0.459886	-1.07751	0.281253	0.999853	Rsad2
ENSMUSG00000079045	20.3497	-0.076081	0.427335	-0.178036	0.858695	0.999853	Prox1os
ENSMUSG00000049625	19.8944	-0.10005	0.44405	-0.225312	0.821736	0.999853	Tifab
ENSMUSG00000099843	20.3433	0.354806	0.450711	0.787214	0.431157	0.999853	Gm7160
ENSMUSG00000103947	18.4613	1.31664	0.735076	1.79117	0.0732665	0.999853	Gm37345
ENSMUSG00000106396	21.8258	-0.536738	0.491914	-1.09112	0.27522	0.999853	Gm42902
ENSMUSG00000026829	19.971	-0.0589374	0.443657	-0.132844	0.894316	0.999853	Gbgt1
ENSMUSG00000111067	20.1673	0.279686	0.403242	0.693595	0.487936	0.999853	Gm48714
ENSMUSG00000044787	20.7661	-0.113433	0.427435	-0.265381	0.790716	0.999853	Spata32
ENSMUSG00000010342	20.4769	0.0385879	0.399952	0.0964815	0.923138	0.999853	Tex14
ENSMUSG00000072487	20.2368	0.0149141	0.380682	0.0391773	0.968749	0.999853	Mroh5
ENSMUSG00000045114	21.1333	-0.422841	0.550694	-0.767833	0.442587	0.999853	Prrt2
ENSMUSG00000006313	19.9659	0.59753	0.532966	1.12114	0.262228	0.999853	Upk1a
ENSMUSG00000084960	20.8587	-0.333818	0.532046	-0.627424	0.530381	0.999853	B430010I23Rik
ENSMUSG00000106414	21.5146	-0.602299	0.510002	-1.18098	0.237613	0.999853	Gm43320
ENSMUSG00000106296	22.113	-0.596847	0.64688	-0.922655	0.356187	0.999853	4632404M16Rik
ENSMUSG00000009628	19.4772	0.362121	0.610376	0.593276	0.552997	0.999853	Tex15
ENSMUSG00000057137	20.8228	0.0820391	0.488455	0.167956	0.866618	0.999853	Tmem140
ENSMUSG00000031323	20.1935	0.511162	0.417174	1.2253	0.220463	0.999853	Dmrtc1a
ENSMUSG00000113918	20.4667	0.307824	0.465771	0.66089	0.508683	0.999853	Gm6566
ENSMUSG00000006720	20.5429	0.396218	0.385179	1.02866	0.30364	0.999853	Zfp184
ENSMUSG00000097827	20.8145	-0.261423	0.436879	-0.598389	0.549581	0.999853	5330439K02Rik
ENSMUSG00000097527	20.4802	0.175777	0.485997	0.361683	0.717589	0.999853	1700112J16Rik
ENSMUSG00000025038	19.9173	0.76563	0.567019	1.35027	0.176929	0.999853	Efhc2
ENSMUSG00000031965	18.7275	0.560312	0.858901	0.65236	0.514169	0.999853	Tbx20
ENSMUSG00000050675	20.5782	0.2277	0.470818	0.483626	0.628651	0.999853	Gp1ba
ENSMUSG00000107667	20.7429	0.70773	0.443759	1.59485	0.110746	0.999853	C530044C16Rik
ENSMUSG00000104671	19.5378	0.650006	0.451976	1.43814	0.150393	0.999853	Gm43062
ENSMUSG00000112441	20.5817	-0.640218	0.447705	-1.43	0.152717	0.999853	Gm48898
ENSMUSG00000026322	20.1343	-0.102534	0.722321	-0.141951	0.887118	0.999853	Htr4
ENSMUSG00000042258	19.453	0.135441	0.929794	0.145667	0.884184	0.999853	Isl1
ENSMUSG00000031103	20.1096	0.363718	0.615203	0.591216	0.554375	0.999853	Elf4
ENSMUSG00000063681	19.795	0.191915	0.667277	0.287609	0.773646	0.999853	Crb1
ENSMUSG00000092242	20.7998	-0.346339	0.62028	-0.55836	0.576599	0.999853	Gm20515
ENSMUSG00000079339	19.6749	-0.0471167	0.711596	-0.0662127	0.947208	0.999853	Ifit1bl1
ENSMUSG00000037613	19.2481	0.517204	0.622896	0.830322	0.406357	0.999853	Tnfrsf23
ENSMUSG00000066315	20.8064	0.217334	0.416882	0.521331	0.602136	0.999853	Gm12918
ENSMUSG00000103967	20.7643	0.284799	0.414465	0.687149	0.491989	0.999853	Gm38214
ENSMUSG00000086401	20.5764	0.078116	0.530859	0.14715	0.883013	0.999853	Gm15559
ENSMUSG00000020904	21.5182	-1.06168	0.633597	-1.67564	0.0938093	0.999853	Cfap52
ENSMUSG00000108918	21.3421	-0.563008	0.538695	-1.04513	0.295961	0.999853	Gm44802
ENSMUSG00000097047	21.2412	-0.138933	0.448856	-0.309527	0.75692	0.999853	1110020A21Rik
ENSMUSG00000084968	20.2498	0.495064	0.502855	0.984507	0.324866	0.999853	Gm12743
ENSMUSG00000108175	20.9539	-0.153255	0.394923	-0.388063	0.69797	0.999853	Gm16499
ENSMUSG00000090273	20.8187	-0.548334	0.467324	-1.17335	0.240656	0.999853	Prr22
ENSMUSG00000106251	20.5953	0.38593	0.365206	1.05675	0.290627	0.999853	Gm42658
ENSMUSG00000113427	21.7402	-0.679746	0.449495	-1.51224	0.130472	0.999853	Gm46378
ENSMUSG00000087610	21.2539	-0.379976	0.429478	-0.884739	0.376297	0.999853	Gm16253
ENSMUSG00000107583	20.7016	0.153463	0.388179	0.39534	0.692592	0.999853	Gm44104
ENSMUSG00000104693	21.9346	-0.785199	0.47807	-1.64243	0.1005	0.999853	Gm42941
ENSMUSG00000092130	22.2896	-0.0917158	0.765289	-0.119845	0.904606	0.999853	D030025P21Rik
ENSMUSG00000021803	20.316	0.182826	0.507245	0.360429	0.718526	0.999853	Cdhr1
ENSMUSG00000030047	20.389	0.0766827	0.469466	0.16334	0.870251	0.999853	Arhgap25
ENSMUSG00000085287	21.412	-0.200055	0.39081	-0.511898	0.608722	0.999853	4833418N02Rik
ENSMUSG00000048779	20.3248	0.538987	0.378401	1.42438	0.154336	0.999853	P2ry6
ENSMUSG00000078868	20.8529	0.615865	0.557954	1.10379	0.269683	0.999853	Gm14412
ENSMUSG00000104011	19.776	0.911832	0.466413	1.95499	0.0505842	0.999853	Gm32391
ENSMUSG00000084792	20.7447	0.411057	0.460349	0.892924	0.371898	0.999853	1700056N10Rik
ENSMUSG00000105304	21.1807	-0.565573	0.374591	-1.50984	0.131084	0.999853	Gm43696
ENSMUSG00000074178	19.8906	0.432001	0.552831	0.781435	0.434547	0.999853	Gm10638
ENSMUSG00000053861	21.3605	-0.0634252	0.457025	-0.138778	0.889625	0.999853	Gm9925
ENSMUSG00000085289	21.0936	-0.363231	0.473944	-0.766402	0.443437	0.999853	Gm15337
ENSMUSG00000097180	21.6819	-0.323332	0.457146	-0.707284	0.47939	0.999853	2700038G22Rik
ENSMUSG00000079357	20.8743	0.353459	0.39434	0.896331	0.370076	0.999853	Gm11100
ENSMUSG00000098097	21.9612	-0.562719	0.761293	-0.739162	0.459809	0.999853	6530403H02Rik
ENSMUSG00000035459	20.9216	0.162356	0.415117	0.391108	0.695717	0.999853	Stab2
ENSMUSG00000073164	18.6238	1.05648	0.872088	1.21144	0.225728	0.999853	2410018L13Rik
ENSMUSG00000027071	21.252	-0.0219024	0.45768	-0.0478553	0.961832	0.999853	P2rx3
ENSMUSG00000096696	20.9298	0.512707	0.371221	1.38114	0.167237	0.999853	Zfp960
ENSMUSG00000043346	20.4056	-0.0143244	0.573457	-0.024979	0.980072	0.999853	Gm6741
ENSMUSG00000039133	19.5689	0.439001	0.614306	0.714629	0.474838	0.999853	9330171B17Rik
ENSMUSG00000040828	21.1079	-0.0160169	0.46902	-0.0341497	0.972758	0.999853	Catsperd
ENSMUSG00000104030	21.8549	-0.663824	0.534768	-1.24133	0.214484	0.999853	5330406M23Rik
ENSMUSG00000082127	20.9004	0.00802147	0.38297	0.0209454	0.983289	0.999853	Gm13577
ENSMUSG00000114771	20.6092	0.135309	0.380645	0.355473	0.722236	0.999853	Gm49064
ENSMUSG00000019982	20.2866	0.390426	0.529916	0.736769	0.461263	0.999853	Myb
ENSMUSG00000093637	21.7952	-0.171272	0.521121	-0.328661	0.742412	0.999853	Gm20636
ENSMUSG00000109555	21.3265	-0.564592	0.430166	-1.3125	0.189352	0.999853	Gm44891
ENSMUSG00000107944	21.7729	-0.218076	0.5221	-0.417691	0.676173	0.999853	Gm44280
ENSMUSG00000097524	21.3087	-0.201805	0.432697	-0.466389	0.640937	0.999853	Gm26846
ENSMUSG00000086742	21.52	-0.515399	0.349868	-1.47313	0.140717	0.999853	Gm16201
ENSMUSG00000112295	21.5294	0.111404	0.494231	0.225409	0.821661	0.999853	Gm47017
ENSMUSG00000030450	20.506	-0.334831	0.721283	-0.464216	0.642493	0.999853	Oca2
ENSMUSG00000078945	20.0407	0.630946	0.44563	1.41585	0.156819	0.999853	Naip2
ENSMUSG00000090069	20.8008	-0.218774	0.53055	-0.412354	0.68008	0.999853	E430024P14Rik
ENSMUSG00000044816	19.6354	0.717757	0.64512	1.1126	0.265882	0.999853	D630023F18Rik
ENSMUSG00000095524	21.1715	-0.112494	0.528087	-0.213021	0.83131	0.999853	Gm15682
ENSMUSG00000083610	20.649	0.135407	0.411941	0.328706	0.742378	0.999853	Oaz2-ps
ENSMUSG00000100158	21.3529	-0.279066	0.483564	-0.577103	0.56387	0.999853	Gm28119
ENSMUSG00000092325	21.6076	0.39348	0.49035	0.802446	0.422295	0.999853	Gm18284
ENSMUSG00000107066	20.7694	0.230352	0.361338	0.637496	0.523802	0.999853	Gm4482
ENSMUSG00000086486	21.2353	-0.352472	0.440883	-0.799468	0.424019	0.999853	Ift88os
ENSMUSG00000042269	21.3331	-0.254693	0.411093	-0.619552	0.535553	0.999853	Fam92b
ENSMUSG00000072722	21.8933	-0.0801215	0.555773	-0.144162	0.885372	0.999853	Gm6588
ENSMUSG00000043925	21.6006	0.705156	0.534321	1.31972	0.186927	0.999853	Olfr544
ENSMUSG00000024793	20.9618	-0.282885	0.393676	-0.718574	0.472404	0.999853	Tnfrsf25
ENSMUSG00000022439	20.7047	-0.0297381	0.423698	-0.0701871	0.944045	0.999853	Parvg
ENSMUSG00000097814	20.9594	-0.0700467	0.500353	-0.139995	0.888664	0.999853	Panct2
ENSMUSG00000026198	20.6944	0.264575	0.407842	0.64872	0.516519	0.999853	Abcb6
ENSMUSG00000026679	20.6176	-0.252518	0.488819	-0.516587	0.605444	0.999853	Enkur
ENSMUSG00000082585	21.0519	-0.153078	0.45236	-0.3384	0.735062	0.999853	Gm15387
ENSMUSG00000024727	20.3022	0.628726	0.428161	1.46843	0.141986	0.999853	Trpm6
ENSMUSG00000114907	21.0876	0.353441	0.418546	0.844449	0.398418	0.999853	Gm47794
ENSMUSG00000071665	19.9902	0.42694	0.604957	0.705737	0.480352	0.999853	Foxr2
ENSMUSG00000105868	20.7551	0.720417	0.457239	1.57558	0.115123	0.999853	Gm43766
ENSMUSG00000103961	21.8659	-0.707354	0.376105	-1.88073	0.0600082	0.999853	Gm36388
ENSMUSG00000003309	19.4612	0.761735	0.548785	1.38804	0.165125	0.999853	Ap1m2
ENSMUSG00000094958	22.0545	0.0458647	0.481974	0.0951601	0.924188	0.999853	3110021N24Rik
ENSMUSG00000104374	22.3861	-0.819142	0.512738	-1.59758	0.110136	0.999853	Gm37517
ENSMUSG00000097452	20.4831	0.108273	0.679513	0.159339	0.873402	0.999853	Gm2824
ENSMUSG00000028976	20.9195	-0.359978	0.55272	-0.651284	0.514863	0.999853	Slc2a5
ENSMUSG00000044361	20.5824	0.144698	0.462466	0.312884	0.754368	0.999853	BC024139
ENSMUSG00000037921	21.13	0.0337126	0.578271	0.058299	0.95351	0.999853	Ddx60
ENSMUSG00000042485	20.5186	0.750656	0.503042	1.49223	0.135638	0.999853	Mustn1
ENSMUSG00000061062	21.7838	-0.269147	0.394175	-0.682811	0.494726	0.999853	Gm10093
ENSMUSG00000024011	20.268	0.189765	0.513215	0.369757	0.711564	0.999853	Pi16
ENSMUSG00000107300	19.9395	0.858583	0.502817	1.70755	0.0877208	0.999853	Gm43279
ENSMUSG00000110129	21.116	0.634281	0.526323	1.20512	0.228158	0.999853	Gm45453
ENSMUSG00000097189	20.8738	0.658315	0.466135	1.41228	0.157866	0.999853	Gm26594
ENSMUSG00000029337	21.3721	0.276859	0.411431	0.672917	0.501	0.999853	Fgf5
ENSMUSG00000028141	21.806	-0.28613	0.374528	-0.763976	0.444882	0.999853	Oaz3
ENSMUSG00000019326	21.0687	-0.366666	0.483988	-0.757594	0.448694	0.999853	Aoc3
ENSMUSG00000106858	20.2177	0.648668	0.479317	1.35332	0.175954	0.999853	Gm43844
ENSMUSG00000108030	21.2825	0.643488	0.503308	1.27852	0.201068	0.999853	9530062K07Rik
ENSMUSG00000107779	22.3484	-0.0594156	0.546665	-0.108687	0.913451	0.999853	Gm43874
ENSMUSG00000092985	21.9117	-0.577519	0.419478	-1.37676	0.168588	0.999853	Mir378b
ENSMUSG00000103436	21.1729	0.138583	0.38291	0.361922	0.71741	0.999853	Gm36995
ENSMUSG00000054582	20.2268	0.944189	0.525361	1.79722	0.0723006	0.999853	Pabpc1l
ENSMUSG00000005628	21.037	0.29256	0.555093	0.527047	0.598161	0.999853	Tmod4
ENSMUSG00000074737	21.6506	-0.347053	0.734307	-0.472627	0.63648	0.999853	C530025M09Rik
ENSMUSG00000087083	22.4473	-0.730819	0.415453	-1.75909	0.0785621	0.999853	Gm15083
ENSMUSG00000000216	21.4819	-0.122853	0.387308	-0.317198	0.751094	0.999853	Scnn1g
ENSMUSG00000023902	20.8558	1.00701	0.546263	1.84346	0.0652625	0.999853	Zscan10
ENSMUSG00000030830	21.932	-0.245644	0.482529	-0.509075	0.6107	0.999853	Itgal
ENSMUSG00000060586	21.5197	-0.896834	0.514435	-1.74334	0.0812744	0.999853	H2-Eb1
ENSMUSG00000026546	20.8571	-0.644134	0.647921	-0.994155	0.320147	0.999853	Cfap45
ENSMUSG00000095990	20.9948	0.150027	0.462531	0.32436	0.745665	0.999853	Zfp97
ENSMUSG00000113836	21.2033	0.883061	0.447095	1.97511	0.0482557	0.999853	Gm3325
ENSMUSG00000027171	22.1619	-0.466653	0.383584	-1.21656	0.223772	0.999853	Prrg4
ENSMUSG00000087038	21.9242	-0.509614	0.42348	-1.2034	0.228823	0.999853	2900079G21Rik
ENSMUSG00000083139	21.7766	0.554934	0.447518	1.24003	0.214965	0.999853	Gm12418
ENSMUSG00000110458	21.9151	0.00937378	0.446473	0.0209951	0.98325	0.999853	Gm21769
[truncated: 15,661 more rows]

## Sheet: P42_Cb_sig
	Gene ID	log2FoldChange	pvalue	padj	Gene name	Gene description
1	ENSMUSG00000019768	5.14486	1.22892e-97	2.0851e-93	Esr1	estrogen receptor 1 (alpha) [Source:MGI Symbol;Acc:MGI:1352467]
2	ENSMUSG00000034990	2.67762	3.64926e-08	0.000309585	Otoa	otoancorin [Source:MGI Symbol;Acc:MGI:2149209]
3	ENSMUSG00000116946	1.65947	3.62125e-06	0.00877739	AC130815.2	predicted gene, 41442 [Source:MGI Symbol;Acc:MGI:5624327]
4	ENSMUSG00000110631	1.63901	6.08625e-06	0.0120899	Gm42047	predicted gene, 42047 [Source:MGI Symbol;Acc:MGI:5624932]
5	ENSMUSG00000004328	1.02879	4.86367e-05	0.0493401	Hif3a	hypoxia inducible factor 3, alpha subunit [Source:MGI Symbol;Acc:MGI:1859778]
6	ENSMUSG00000001627	0.607285	4.67109e-05	0.0493401	Ifrd1	interferon-related developmental regulator 1 [Source:MGI Symbol;Acc:MGI:1316717]
7	ENSMUSG00000057615	-0.756837	4.94361e-05	0.0493401	Ldoc1	regulator of NFKB signaling [Source:MGI Symbol;Acc:MGI:2685212]
8	ENSMUSG00000016918	-0.757546	8.36425e-07	0.0031238	Sulf1	sulfatase 1 [Source:MGI Symbol;Acc:MGI:2138563]
9	ENSMUSG00000090125	-0.963749	2.33348e-05	0.0359928	Pou3f1	POU domain, class 3, transcription factor 1 [Source:MGI Symbol;Acc:MGI:101896]
10	ENSMUSG00000027570	-1.05396	1.10466e-06	0.0031238	Col9a3	collagen, type IX, alpha 3 [Source:MGI Symbol;Acc:MGI:894686]
11	ENSMUSG00000115529	-1.46548	7.87408e-08	0.000445332	9630013A20Rik	RIKEN cDNA 9630013A20 gene [Source:MGI Symbol;Acc:MGI:2442953]
12	ENSMUSG00000048538	-1.62512	3.19626e-05	0.0451925	Gm9826	predicted gene 9826 [Source:MGI Symbol;Acc:MGI:3642725]
13	ENSMUSG00000058626	-2.5912	6.41301e-06	0.0120899	Capn11	calpain 11 [Source:MGI Symbol;Acc:MGI:1352490]
