# Supplementary material for: Molecular basis of neurodegeneration in a mouse model of Polr3-related disease
Source: eLife. 2024 Nov 5;13:RP95314. doi: 10.7554/eLife.95314 (PMC11537486; doi:10.7554/eLife.95314)
Supplement: Supplementary file 5. [file elife-95314-supp5.xlsx]

## Sheet: Legend Table S5
Supplementary File 5. tRNAseq P42_Ca. tRNAseq results and analysis of P42 cerebra. DESeq2 normalized tRNA reads, DESeq2 tRNA results, DE(LRT) tRNAs, DESeq2 normalized tRNA decoder reads, DESeq2 tRNA decoder results, DE(LRT) tRNA decoders.

## Sheet:  norm counts_Ca tRNA
tRNA isodecoder	KI_1	KI_2	KI_3	KI_4	WT_1	WT_2	WT_3	WT_4	WT_5	WT_6
Ala-AGC-10-1	16.9757	8.24733	18.2886	10.1207	7.90927	20.2161	12.0504	32.2223	18.9945	10.6308
Ala-AGC-1-1	177.137	225.427	214.475	172.895	871.602	696.975	774.844	951.796	816.763	708.012
Ala-AGC-2	7056.71	8419.84	10257.4	7900.02	15854.9	13699.8	14836.5	14042.7	13372.1	13252.4
Ala-AGC-3-1	7661.93	8008.16	8644.67	7292.78	11384.6	13183.8	12739.7	13442.9	12395.8	12115.9
Ala-AGC-4	64841.2	78520.1	77250	72576.1	88096.6	93995.4	98549.8	109697	87311.3	81089.8
Ala-AGC-5	2826.82	3601.34	2942.8	2628.84	8258.86	6734.86	9139.06	9470.86	11557.5	6196.7
Ala-AGC-6-1	12359	14874.8	14778	13382	17492.1	17559.2	19860.3	20075.7	17244.5	14763
Ala-AGC-7-1	4485.27	4628.82	4897.18	4623.46	5360.91	5156.08	6592.8	7357.83	6266.91	5087.91
Ala-AGC-8-1	28.7848	29.5529	45.7214	36.2657	39.5464	45.2456	60.2522	49.5727	56.9835	46.7756
Ala-CGC-1	8820.71	11827.4	14041.5	11186.7	14515.1	14112.8	16562.1	15538.6	15897.1	12270.1
Ala-CGC-2-1	12870.5	16439	17763.2	15219.8	18325.8	17588	19175.9	20194.7	17382.5	15430.6
Ala-CGC-3	28.0468	52.2331	42.3962	32.0488	36.3827	31.7682	55.4321	91.7095	43.0542	41.4602
Ala-CGC-4-1	5.90458	11.6837	2.49389	3.37355	11.073	12.5148	16.8706	34.7009	3.7989	9.56774
Ala-CGC-5-1	11.8092	15.1201	10.8069	9.27727	28.4734	24.0668	26.511	22.3077	13.9293	20.1986
Ala-TGC-1-1	2550.04	3201.34	3652.72	3171.98	5392.54	5098.32	5182.9	5557.1	5267.8	4454.31
Ala-TGC-2	18849.6	22764.7	26221.6	22360.8	24987	25098.8	26241.1	26618.1	26164.3	22315.2
Ala-TGC-4-1	6356.28	8055.58	7962.17	6919.16	11031.9	10992.8	12522.8	12383.3	11734.8	9560.29
Ala-TGC-5	81.188	98.968	113.057	103.737	109.148	118.409	139.785	226.795	216.537	179.661
Ala-TGC-6-1	4542.84	5171.08	5047.64	4650.44	4400.72	5336.1	5448.01	6006.97	5431.16	4477.7
Ala-TGC-7	277.515	370.443	339.17	313.741	275.243	363.891	404.895	748.548	662.274	581.506
Ala-TGC-8-1	21.4041	17.8692	30.758	30.362	18.9823	26.9549	31.3312	49.5727	43.0542	44.6494
Arg-ACG-1	123624	92331.6	74214.1	82576.2	148544	122740	140193	108344	117350	118379
Arg-ACG-2-1	14832.3	13569.6	8988	10086.9	26869.4	19500.9	26613.4	22877.8	24024.2	21949.5
Arg-ACG-3	59952.9	44051.8	33868.8	38295.7	74291.8	58074.2	64573.5	52571.8	55450	57284.2
Arg-CCG-1-1	23478.1	21308.4	13985.8	15396.9	32182.8	24220.9	31280.6	25844.7	27710.4	28093
Arg-CCG-2-1	20851.3	15351	12061.3	13271.6	16911.6	13792.2	15331.8	14045.2	15560.3	16453.3
Arg-CCG-3-1	66116.5	46642.8	44601.6	44972.9	77843.1	59588.5	49794.9	46411.2	56350.3	71240.3
Arg-CCT-1-1	2068.82	2155.3	3169.74	2844.75	3015.01	3810.26	3250.01	3590.3	3740.65	3661.25
Arg-CCT-2	7744.6	4941.53	5055.12	5073.83	12063.2	8460.94	7673.73	6952.57	8636.16	11574.8
Arg-CCT-3-1	1103.42	1403.42	1655.11	1518.1	2456.62	2548.2	2531.8	2363.38	2654.16	2114.47
Arg-CCT-4-1	79277.9	55029.6	47886.9	53655.5	94909.7	76230.2	59702.7	55430.9	65228.3	91300.7
Arg-TCG-1-1	97356.9	78896.7	59435.3	69442.1	108452	93147.3	100704	88147.7	96699.7	105763
Arg-TCG-2-1	34693.1	28166	25537.5	28752.8	41789.4	33969.9	39409.8	36243.8	40029	40876.6
Arg-TCG-3	102476	93113.1	61575.9	80131.2	169559	128293	141443	130343	123891	130149
Arg-TCG-4-1	6740.08	9803.33	8215.72	9347.28	13876	14240.8	15010	17291	14167.4	10808.4
Arg-TCT-1-1	20145	13731.1	13608.4	12863.4	19061.3	17076.9	14283.4	14141.8	16468.2	19804.2
Arg-TCT-2-1	6007.17	4335.35	2868.81	3336.45	7664.09	6076.39	6436.15	6174.28	6411.27	6003.22
Arg-TCT-3-1	10390.6	6838.41	6274.64	5373.23	12036.3	10201.4	10136.8	7728.38	9637.8	10500.1
Arg-TCT-4-1	9701.23	8080.33	5858.99	6039.51	8002.6	6513.45	7923.17	7408.64	7364.8	8097.49
Arg-TCT-5-1	636.219	509.96	394.867	405.67	1089.9	835.6	1026.7	1210.81	1363.8	1093.91
Asn-GTT-1-1	574.22	408.243	434.769	417.477	716.58	593.007	594.087	535.385	607.824	616.587
Asn-GTT-2-1	1070.21	872.843	645.087	635.072	1675.18	1236.07	1373.75	1592.52	1342.28	1098.16
Asn-GTT-3	601889	458495	381712	401218	646189	514016	592728	518489	543741	563813
Asp-GTC-1	484013	240072	214847	224319	407837	322501	302001	265323	313443	380040
Asp-GTC-2-1	110664	51840	49203.7	50240.7	79194	67117.6	57934.9	53340.2	61627	79535.5
Asp-GTC-4-1	18.4518	9.62189	9.97558	3.37355	18.9823	11.5521	18.0757	11.1539	6.3315	14.8831
Cys-GCA-10-1	61.9981	56.3568	54.8657	53.9769	151.858	95.3047	144.605	68.1625	77.2442	88.2358
Cys-GCA-12-1	7.38073	13.0583	9.97558	17.7112	20.5641	23.1042	26.511	18.5898	17.7282	21.2616
Cys-GCA-14-1	69.3788	48.7967	54.0344	36.2657	88.5839	68.3498	78.3279	59.4872	60.7824	70.1634
Cys-GCA-15-1	92.9971	54.2949	39.9023	46.3864	87.002	82.7899	89.1733	59.4872	62.0487	66.9742
Cys-GCA-16-1	14.0234	5.49822	10.8069	8.43389	17.4004	10.5894	9.64036	13.6325	15.1956	24.4509
Cys-GCA-17-1	60.522	59.7932	104.744	64.0975	104.402	89.5286	66.2775	81.7949	75.9779	78.6681
Cys-GCA-18-1	58.3077	41.9239	44.8901	27.8318	99.6568	69.3125	75.9178	53.2906	59.5161	65.9111
Cys-GCA-2-1	385.274	285.22	422.299	310.367	468.229	363.891	256.675	293.718	365.96	381.646
Cys-GCA-21-1	11.0711	6.1855	11.6382	7.5905	11.073	9.62673	9.64036	4.95727	11.3967	8.50465
Cys-GCA-24-1	11.8092	10.9964	8.31298	2.53017	11.073	17.3281	15.6656	13.6325	16.4619	15.9462
Cys-GCA-3	1803.11	1222.67	1968.51	1365.45	2007.37	1534.5	1178.53	1316.15	1309.35	1555.29
Cys-GCA-5-1	56.0935	41.2367	47.384	49.7599	93.3294	57.7604	65.0724	48.3334	46.8531	57.4064
Cys-GCA-7-1	56.0935	54.2949	53.2031	38.7959	82.2564	51.9844	57.8422	64.4445	45.5868	59.5326
Cys-GCA-8-1	886.425	632.296	823.817	759.893	1081.99	844.264	730.257	803.078	754.714	861.096
Cys-GCA-9-1	78.9738	50.8586	54.8657	64.9409	148.694	101.081	143.4	80.5556	97.505	122.254
Gln-CTG-1-1	186.732	116.837	136.333	85.1822	303.716	218.527	221.728	228.034	126.63	222.184
Gln-CTG-2	395867	354013	217907	285986	665129	438118	476883	476599	424805	441175
Gln-CTG-3	559.459	401.37	482.153	306.15	1066.17	772.064	609.753	677.907	1035.83	721.833
Gln-CTG-4-1	592.672	300.34	364.94	247.956	697.598	490.963	527.81	572.565	662.274	518.784
Gln-CTG-5-1	74.5453	63.2296	62.3474	56.507	129.712	93.3793	75.9178	114.017	253.26	91.425
Gln-TTG-1-1	7172.59	5258.36	6499.92	4813.22	10342.2	8485.97	6310.82	6409.75	7259.69	7979.49
Gln-TTG-2-1	245.778	156.012	204.499	145.906	468.229	263.772	345.848	389.146	484.993	422.043
Gln-TTG-3	5220.39	3909.92	4558.84	3396.33	7366.7	5727.91	4676.78	4679.66	5190.56	5252.69
Gln-TTG-5-1	87.0926	46.0476	34.9145	29.5186	72.7653	59.6857	48.2018	58.2479	45.5868	76.5419
Glu-CTC-1	134356	112755	124805	119370	146708	138009	131760	124776	152706	127846
Glu-CTC-2-1	41.3321	34.3639	40.7336	37.1091	71.1835	65.4618	60.2522	58.2479	62.0487	57.4064
Glu-TTC-1	46842.5	43075.1	47406.4	43728	53428.7	58313.9	56460	55035.6	64445.8	53819.6
Glu-TTC-2	39116.4	37096.5	39169.9	36308.7	38263.5	42465.4	41769.3	41318.8	47383.6	40873.4
Glu-TTC-3	162.376	127.834	131.345	134.942	227.787	166.542	131.35	177.222	181.081	176.472
Gly-ACC-1-1	19.1899	32.9893	13.3008	21.0847	37.9645	41.395	26.511	32.2223	15.1956	18.0724
Gly-CCC-1	48499.5	45461.4	53712.7	47230.6	58905.1	64355.7	58541.1	58189.7	59856.7	55590.7
Gly-CCC-2	138.02	97.5934	187.873	137.472	126.548	160.766	107.249	266.453	277.32	163.715
Gly-CCC-3-1	373.465	401.37	591.053	511.093	590.032	583.38	603.728	1043.51	1161.2	695.256
Gly-GCC-1	3299.92	2982.1	3117.37	2467.75	6983.89	5808.77	6671.13	6306.89	8019.47	5014.56
Gly-GCC-2	855.426	862.534	995.895	872.064	1001.31	1180.24	1117.08	1171.15	1071.29	1069.46
Gly-GCC-3-1	859.116	876.279	1059.07	1017.13	1004.48	1114.78	1092.98	1168.68	1233.38	998.234
Gly-GCC-4-1	15380.7	15030.8	17592.8	16861.9	16699.6	19323.7	16712.8	18426.2	18926.1	16608.5
Gly-TCC-1	53595.9	47343.8	58307.3	52540.6	54265.5	67377.5	58485.7	62544.6	65751.3	58036.8
His-GTG-1-1	8.1188	27.4911	18.2886	16.8678	18.9823	45.2456	33.7413	68.1625	34.1901	26.577
His-GTG-2	2750.06	3574.53	4651.11	4181.52	4649.07	6530.78	4890.07	5424.49	5124.71	4186.42
His-GTG-3-1	7.38073	13.7456	20.7825	14.3376	23.7278	26.9549	14.4605	35.9402	16.4619	27.6401
Ile-AAT-1	35225.3	45192.6	49094.8	44664.2	54906.2	66282	59688.3	61954.7	53846.8	44305
Ile-AAT-2-1	20.666	24.742	30.758	24.4583	39.5464	41.395	49.4068	45.8547	53.1846	32.9555
Ile-AAT-3-1	55.3554	65.2914	68.1665	64.9409	83.8383	103.969	108.454	126.41	81.0431	58.4695
Ile-TAT-1-1	9253.95	13502.3	13686.5	12628.1	14708.1	19317	17904.6	20095.5	16273.2	13268.3
Ile-TAT-2	17825.9	25995.6	29158.6	24101.5	30558.3	39178.9	36032.1	36418.6	32637.6	28791.4
iMet-CAT-1	87872	77800.5	80553.6	77834.6	89991.7	105254	91871.4	86123.9	107371	90318.4
iMet-CAT-2-1	537.317	536.764	509.586	486.635	593.195	655.581	659.16	534.146	631.883	611.272
iMet-CAT-3-1	1402.34	1236.41	1310.96	1308.1	1395.2	1626.92	1567.76	1246.75	1761.42	1522.33
Leu-AAG-1	3641.65	3807.52	4262.07	4470.8	5851.28	5888.67	3766.97	4642.48	5260.21	4640.35
Leu-AAG-2-1	278.991	221.991	290.123	268.198	355.917	360.04	239.804	286.282	345.7	271.086
Leu-AAG-3-1	372.727	533.328	481.322	425.911	1015.55	722.968	901.374	1023.68	961.121	800.501
Leu-CAA-1-1	1450.31	1805.48	1873.75	1747.5	1846.02	1978.29	2114.85	2489.79	2066.6	1771.09
Leu-CAA-2-1	9682.77	11299.5	11929.1	11727.3	12517.2	12483.9	13724.3	13844.4	12569.3	10972.1
Leu-CAA-3-1	8877.54	10549	10924.1	10683.2	11533.3	12998	13414.6	14092.3	12983.4	10608.5
Leu-CAA-4-1	230.279	323.021	261.028	284.222	771.945	641.14	765.204	1125.3	910.469	584.695
Leu-CAG-1	5848.49	5795.13	7482.52	7666.4	8746.07	9619.03	7238.71	8608.3	8951.47	7421.37
Leu-CAG-2	17041.4	17269.9	20814	20001	19603.9	22389.9	18417.9	21502.2	21309.3	18953.7
Leu-CAG-3-1	12.5472	11.6837	23.2764	15.181	34.8008	31.7682	18.0757	24.7863	18.9945	15.9462
Leu-CAG-4-1	738.073	850.163	919.416	831.581	890.584	1114.78	1129.13	1164.96	937.061	884.484
Leu-TAA-1-1	12635.8	14836.3	10262.4	11195.1	23481	24716.6	24139.5	23887.8	20150.6	16775.4
Leu-TAA-2-1	59096.7	73453.5	56280.6	68357.5	95665.8	102171	94635.8	99608.9	83899.9	75861.5
Leu-TAG-1-1	5971.75	6634.98	7544.03	6268.91	8526.2	8971.15	8796.83	8754.54	8935.01	7632.93
Leu-TAG-2-1	777.928	985.556	1087.34	911.703	1528.07	1393.95	1501.49	1865.17	1899.45	1406.46
Leu-TAG-3-1	9101.17	9884.43	11326.4	9875.24	10609.5	11774.5	10644.2	11640.9	11320.7	10056.8
Lys-CTT-1-1	107.759	70.7896	63.1787	59.0372	192.986	163.654	109.659	87.9915	67.1139	141.39
Lys-CTT-14-1	71.593	49.484	24.9389	21.0847	107.566	117.446	65.0724	63.2052	40.5216	58.4695
Lys-CTT-2	49152.7	26271.2	30681.6	24653.9	41895.4	33782.1	33326.7	29761	37819.3	42027.9
Lys-CTT-3	108032	69382.8	65794.8	53732.3	118816	87879.6	84920.7	75209.2	95282.7	99241.9
Lys-CTT-4-1	3596.63	2318.88	1901.18	1838.59	4108.08	4441.77	3330.74	2914.87	2649.1	3198.81
Lys-CTT-5-1	32.4752	19.9311	9.97558	10.9641	22.146	22.1415	22.8959	17.3504	15.1956	23.3878
Lys-CTT-6-1	107.759	50.1713	55.697	64.9409	93.3294	92.4166	78.3279	69.4018	77.2442	81.8573
Lys-CTT-7-1	16.9757	13.0583	11.6382	10.9641	15.8185	14.4401	26.511	14.8718	13.9293	26.577
Lys-TTT-1	547098	399761	263572	335228	673356	555085	434096	437696	387888	511439
Lys-TTT-2	9481.28	8215.03	5125.78	6533.73	21712.5	15252.6	17024.9	20062.1	18314.5	15263.7
Lys-TTT-3-1	669.432	437.796	352.47	461.334	963.349	692.162	706.156	892.308	757.247	682.499
Lys-TTT-5-1	118.83	83.1606	74.8168	78.4351	188.241	169.43	151.836	136.325	97.505	149.895
Met-CAT-1	53361.9	75328.4	65014.2	70504.8	73875.8	95251.7	92496.8	95727.3	76389.5	67858.6
Met-CAT-2	13726.7	22763.3	19064.2	21090.6	24577.3	28505.7	28082.4	28332	23477.2	19313
Met-CAT-3-1	3623.94	6207.49	4272.87	4700.2	9704.68	8934.57	10373	10497	7927.03	6325.34
Met-CAT-4-1	216.255	342.264	230.27	253.86	1156.34	1060.87	1327.96	1650.77	1144.73	676.12
Met-CAT-5-1	31.7371	48.7967	29.0954	46.3864	45.8738	85.6779	56.6371	94.1881	51.9183	46.7756
Met-CAT-6-1	37.6417	75.6006	52.3718	61.5674	132.876	113.595	143.4	174.744	146.891	70.1634
Phe-GAA-1	75040.6	92401.8	86105	92483.5	128812	136065	121014	142049	105581	88252.8
Phe-GAA-2-1	2843.79	3599.96	3028.42	3338.13	6501.42	6041.74	6406.02	9148.64	6835.48	4596.77
Phe-GAA-3-1	5902.37	8067.27	7431.81	7364.47	12743.4	12579.3	12419.2	14455.4	10686.3	8309.05
Pro-AGG-1	1511.57	1101.71	729.049	792.785	2451.87	1833.89	1297.83	1357.05	1114.34	1333.1
Pro-CGG-1	28443.8	14856.2	13975.8	13452	31776.3	22661.3	18789.1	16790.3	18124.5	25257.8
Pro-TGG-1-1	29971.7	15962	13689	13096.1	32110.1	27682.6	20908.7	17909.4	17749.7	25044.1
Pro-TGG-2	38002.6	20127.6	18114	17545.9	43464.6	31334.1	25255.3	22503.5	24036.9	33557.2
Pro-TGG-3-1	997.874	817.861	471.346	498.443	1730.55	1586.49	1402.67	1162.48	920.599	1180.02
SeC-TCA-1-1	12849.8	8829.46	9789.37	10108.9	12216.7	12115.2	10911.7	10968	13170.8	14303.8
Ser-AGA-1-1	104.806	68.7278	49.0466	53.9769	161.349	117.446	101.224	90.4702	84.842	71.2265
Ser-AGA-2	1413.41	894.836	848.755	885.558	1972.57	1788.65	1638.86	1362.01	1324.55	1497.88
Ser-AGA-3-1	137.281	128.521	84.7924	126.508	243.606	196.385	221.728	185.898	192.477	167.967
Ser-CGA-1-1	10291.7	7632.91	8289.71	7708.57	10935.4	9689.31	9283.67	9537.79	9416.2	10830.7
Ser-CGA-2-1	115185	96361.8	62512	81485.7	180178	122986	136200	134851	124211	116702
Ser-CGA-3-1	1584.64	1080.4	898.633	845.919	1374.63	1125.37	1109.85	966.668	978.849	974.846
Ser-GCT-1-1	2971.48	2431.59	1330.91	1535.81	7200.6	4128.91	5596.23	5918.98	6489.78	4264.02
Ser-GCT-2-1	30471.3	18305.6	17166.3	15686.2	29761	24816.8	27058.1	21684.3	23009.9	24460.4
Ser-GCT-3-1	161190	98557.7	94058.1	89967.6	170674	129116	146703	121581	131584	135539
Ser-GCT-4	1429.65	841.228	858.731	775.074	1672.02	1344.85	1564.15	1101.75	1219.45	1340.55
Ser-GCT-5-1	960.232	712.707	578.584	651.939	1040.86	825.011	1101.41	1406.63	1125.74	1150.25
Ser-GGA-1-1	188.209	208.932	231.932	218.438	378.063	384.107	381.999	513.077	334.303	225.373
Ser-TGA-1-1	196630	196737	128006	166219	352225	285620	291215	258579	241170	222776
Ser-TGA-2	10248.9	7168.31	6189.02	5819.38	13996.2	10269.8	10982.8	8923.08	8971.73	9418.9
Sup-TCA-1-1	43.5463	35.7384	24.1076	21.9281	105.984	75.0885	56.6371	34.7009	25.326	59.5326
Thr-AGT-1	353.537	215.118	332.519	252.173	705.507	471.71	365.129	418.889	406.482	409.287
Thr-AGT-2-1	44556.7	47631.1	44634.1	39585.3	82008.1	61691	59024.3	49618.5	49441.4	58393
Thr-AGT-3-1	16.9757	11.6837	12.4695	5.90372	15.8185	14.4401	8.43531	16.1111	18.9945	21.2616
Thr-AGT-4-1	15725.4	18814.2	16388.2	14561.9	30499.7	22066.4	24138.3	19242.9	19861.9	21900.5
Thr-AGT-5-1	1975.82	2321.62	1837.17	1798.1	5911.39	3613.88	4499.64	4340.09	3948.32	3974.86
Thr-AGT-6-1	2601.71	3007.53	2574.53	2535.23	7422.06	4741.17	7633.96	7083.94	7894.11	6524.13
Thr-AGT-7-1	215.517	188.314	150.465	175.425	419.191	298.429	292.826	260.257	251.994	256.203
Thr-CGT-1-1	22279.5	19228	16467.2	17571.2	26219.2	24542.4	26505	20464.8	18546.2	19628.7
Thr-CGT-2-1	22466.2	20594.3	16265.2	17806.5	30026.8	26007.6	27860.6	22113.1	19513.7	20639.7
Thr-CGT-3-1	10139.6	11929.1	9795.19	9241.01	19558	12774.7	16526	14742.9	14743.5	15774
Thr-CGT-4-1	1813.44	2204.1	2137.27	1895.09	4674.38	2755.17	3811.56	3186.28	3415.21	3150.97
Thr-TGT-1-1	30564.3	32003.1	25663.8	26271.6	45521	33326.8	34266.7	31000.3	29780.8	32552.6
Thr-TGT-2-1	716.668	517.52	790.565	527.118	1241.76	801.907	704.951	711.368	802.834	840.898
Thr-TGT-3	3879.31	2965.6	4366.81	2940.05	5985.74	4155.86	3492.22	3453.98	3453.2	3916.39
Trp-CCA-2-1	5812.32	8672.76	8879.1	8732.45	10680.7	12568.7	10717.7	12574.1	8871.69	8131.51
Trp-CCA-3	5.90458	8.93461	17.4573	5.06033	20.5641	37.5443	10.8454	27.265	12.663	18.0724
Trp-CCA-5-1	19691	27771.5	28254.2	29725.2	30903.1	38895.9	34802.9	38990.2	30733.1	27612.5
Trp-CCA-6-1	13.2853	23.3674	15.7947	18.5545	37.9645	77.0139	61.4573	94.1881	22.7934	42.5233
Tyr-GTA-1	47830.8	65586.9	39893.2	55678	138737	117276	114729	114342	86683.2	77869.7
Tyr-GTA-2-1	456.867	487.967	572.764	510.25	726.071	732.594	692.901	651.881	664.807	535.793
Tyr-GTA-3	602.267	621.986	683.327	785.195	1055.1	1031.02	972.471	843.975	920.599	763.293
Tyr-GTA-4-1	7048.59	8054.9	7341.19	7590.5	13377.7	12250	11961.3	11286.5	10807.9	9598.57
Tyr-GTA-5-1	484.176	622.674	517.899	508.563	1210.12	1032.95	1077.31	1022.44	783.839	733.526
Val-AAC-1	52.4032	66.6659	75.6481	47.2298	142.367	93.3793	89.1733	123.932	79.7768	77.605
Val-AAC-2	778.667	1013.05	1121.42	873.751	2360.13	2398.98	2494.44	2530.69	2545.26	1874.21
Val-AAC-4-1	795.642	1091.4	897.802	827.364	2032.68	2190.08	2270.3	2310.09	2026.08	1481.94
Val-AAC-5-1	680.503	710.645	941.03	763.267	957.022	1198.53	935.115	1231.88	1200.45	983.351
Val-CAC-1-1	608.172	767.689	596.041	560.853	1983.65	1937.86	1852.15	1841.63	1681.65	1010.99
Val-CAC-2	17732.2	20337.2	26594.1	21481.9	23237.4	30067.2	24075.6	26030.6	25594.4	21500.8
Val-CAC-3-1	1075.37	1379.37	1293.5	1157.97	2600.57	2692.6	2477.57	2446.41	2575.65	1816.81
Val-CAC-4-1	29.5229	39.1748	47.384	38.7959	34.8008	73.1632	59.0472	64.4445	45.5868	41.4602
Val-CAC-5-1	12.5472	19.9311	13.3008	11.8074	15.8185	23.1042	27.716	24.7863	15.1956	25.514
Val-CAC-7-1	9.59494	12.371	7.48168	2.53017	18.9823	20.2161	27.716	19.8291	10.1304	18.0724
Val-TAC-1	15992.6	18795	20526.4	18173.3	20192.4	27287.9	22227.1	24237.3	21739.8	20443.1
Ala-TGC-MT	6710.56	6978.62	7624.67	7565.2	5947.77	7015	7349.57	8723.55	7554.74	6604.93
Arg-TCG-MT	13783.5	12487.2	16566.9	14730.6	11712.1	13933.7	13084.4	15513.8	14519.4	13339.6
Asn-GTT-MT	19942.7	12439.7	12238.4	10620.8	17424.1	11693.6	12366.2	10068.2	14368.7	15765.5
Asp-GTC-MT	16288.5	13694	15964.3	13181.3	14959.6	14210	15978.9	14474	14416.8	13206.7
Cys-GCA-MT	8346.86	8837.02	8312.98	9052.09	9144.7	5220.58	9129.42	8669.02	9314.9	8784.25
Gln-TTG-MT	22283.9	13048.7	12616.6	9869.33	14363.2	12347.2	12097.4	9980.22	12920	15556.1
Glu-TTC-MT	7032.36	7819.16	9106.04	8955.94	6789.32	8182.72	7370.06	9640.65	8401.89	7868.93
Gly-TCC-MT	19449.7	20115.2	22715.2	20275.9	18446	23480.6	19522.9	20705.3	18923.6	21417.9
His-GTG-MT	9692.37	10080.3	9374.55	8844.62	8722.35	15950.5	11256.3	10313.6	8970.46	9152.07
Ile-GAT-MT	16014.7	13975.1	15311.7	15697.1	31134.1	16249	15100.4	14765.2	13796.3	14887.4
Leu1-TAA-MT	9113.72	9475.5	8652.98	12539.5	8920.08	8807.5	9519.86	8933	12254	12988.7
Leu2-TAG-MT	23574.8	25335.1	26795.2	22238.5	19377.7	24271.9	23832.2	21062.2	24575.1	23766.3
Lys-TTT-MT	44517.6	41482	42905	42863.5	41438.3	40779.8	40843.8	39189.7	40216.4	43997.8
Met-CAT-MT	27003.1	23195.6	27013.9	26514.4	24224.5	27354.4	23414	21704.2	26294.7	28639.4
Phe-GAA-MT	48521.6	59820	48586.9	51990.7	82269.1	87038.2	69290.1	72378.6	46193.3	65644.2
Pro-TGG-MT	44539	40398.2	39899.8	43599	43720.9	34273.1	40238.9	42470.2	43151.7	48708.3
Ser1-TGA-MT	17812.6	22135.2	16621.8	20780.3	27252.2	28293.9	22087.3	25233.7	21777.8	23604.7
Ser2-GCT-MT	24556.4	29034.1	27033	26301.9	24665.9	25322.2	26082	24845.8	23795	24354.1
Thr-TGT-MT	20787.1	26585.3	26070.3	25490.6	20717.5	24382.6	28815	27910.7	24382.6	22228
Trp-TCA-MT	187138	122712	103798	97508.4	157118	111679	126112	107684	108613	116196
Tyr-GTA-MT	26824.5	35967.3	29446.2	33447.1	41330.7	40923.2	40630.5	40430.2	31520.7	34880.8
Val-TAC-MT	105103	97730.2	102023	102166	90257.5	87289.4	86282.4	85910.7	96970.7	91206
ecoliSpikeIn_Gln	19009.8	15336.6	15062.3	11655.6	16234.6	18834.7	16877.9	12458.9	15437.5	14811.9

## Sheet: DESeq2_Ca tRNA
tRNA isodecoder	baseMean	log2FoldChange	lfcSE	stat	pvalue	padj
Ala-AGC-1-1	560.993	2.02208	0.140929	183.61	7.89402e-42	1.65774e-39
Met-CAT-4-1	805.944	2.16449	0.216512	85.5048	2.31138e-20	1.8094e-18
Val-AAC-2	1799.06	1.32217	0.13728	85.2837	2.58485e-20	1.8094e-18
Thr-AGT-6-1	5201.84	1.36073	0.147507	77.6586	1.22483e-18	6.43036e-17
Ala-AGC-5	6335.77	1.51245	0.176636	65.9698	4.57885e-16	1.92312e-14
Leu-CAA-4-1	589.73	1.54105	0.187554	61.2948	4.9137e-15	1.7198e-13
Val-AAC-4-1	1592.34	1.18364	0.149942	57.907	2.74813e-14	8.24438e-13
Val-CAC-1-1	1284.07	1.43928	0.183289	56.0876	6.93122e-14	1.81944e-12
Gly-GCC-1	5067.18	1.12408	0.145195	55.781	8.10092e-14	1.89022e-12
Thr-AGT-5-1	3422.09	1.14301	0.150904	53.3431	2.80094e-13	5.88197e-12
Val-CAC-3-1	1951.58	0.988989	0.135171	50.4733	1.20796e-12	2.30611e-11
Ala-AGC-3-1	10687	0.666783	0.0929801	49.5159	1.96772e-12	3.44351e-11
Lys-TTT-2	13698.6	1.28929	0.17579	49.3233	2.17073e-12	3.50657e-11
Arg-TCT-5-1	856.744	1.17972	0.173125	43.2476	4.82329e-11	7.23493e-10
Leu-AAG-3-1	723.848	0.994518	0.147488	43.0493	5.33782e-11	7.47295e-10
Ala-AGC-2	11869.2	0.753551	0.122177	36.3907	1.61469e-09	2.11928e-08
Arg-ACG-2-1	18931.2	0.993874	0.160487	36.0245	1.94848e-09	2.40695e-08
Phe-GAA-2-1	5234.04	1.04058	0.168719	35.6219	2.39576e-09	2.64795e-08
Ser-GCT-1-1	4186.83	1.43716	0.228886	35.7079	2.29232e-09	2.64795e-08
Arg-CCT-3-1	2034.87	0.784022	0.130451	34.5514	4.15149e-09	4.35906e-08
Ala-TGC-1-1	4352.91	0.714415	0.120895	33.5246	7.03676e-09	7.03676e-08
Leu-TAA-1-1	18208.1	0.85927	0.147675	32.1325	1.44005e-08	1.37459e-07
Tyr-GTA-1	85862.5	1.05123	0.182993	30.8512	2.78595e-08	2.54369e-07
Tyr-GTA-4-1	9931.71	0.620757	0.11274	29.2738	6.28404e-08	5.49854e-07
Tyr-GTA-5-1	799.349	0.871681	0.159996	28.2852	1.04696e-07	8.79445e-07
Ala-TGC-4-1	9751.9	0.634748	0.118006	27.9103	1.27069e-07	1.02633e-06
Leu-TAG-2-1	1335.71	0.765384	0.142045	27.8281	1.32586e-07	1.03123e-06
Gln-TTG-2-1	312.623	1.07092	0.201952	26.5449	2.57489e-07	1.93117e-06
Thr-CGT-4-1	2904.35	0.797421	0.151708	26.3691	2.82017e-07	2.04219e-06
Met-CAT-3-1	7256.62	0.930433	0.17917	25.4624	4.5109e-07	3.15763e-06
Arg-TCG-4-1	11950	0.7391	0.149936	23.2662	1.41057e-06	9.55547e-06
Met-CAT-6-1	100.885	1.19332	0.257173	20.431	6.18206e-06	4.05698e-05
Arg-TCG-3	116097	0.703088	0.153659	20.0916	7.38204e-06	4.55949e-05
Phe-GAA-3-1	9995.85	0.722364	0.157756	20.0996	7.3512e-06	4.55949e-05
Thr-CGT-3-1	13522.4	0.61008	0.134885	19.7623	8.76965e-06	5.26179e-05
Trp-CCA-6-1	40.6942	1.66028	0.36342	19.6473	9.31338e-06	5.43281e-05
Asn-GTT-2-1	1154.12	0.781564	0.177727	18.5019	1.69737e-05	9.63372e-05
Gln-CTG-3	663.269	0.89506	0.203594	18.362	1.82668e-05	0.000100948
Ser-AGA-3-1	168.516	0.749767	0.173776	18.1329	2.0601e-05	0.000110928
Ser-TGA-1-1	233918	0.679259	0.162476	16.8004	4.1525e-05	0.000218006
Leu-TAA-2-1	80903.2	0.516466	0.12549	16.4603	4.96801e-05	0.0002484
Ser-GGA-1-1	306.443	0.801851	0.193473	16.501	4.86233e-05	0.0002484
Cys-GCA-9-1	94.3129	0.885286	0.218951	15.8756	6.76454e-05	0.000330361
Pro-TGG-3-1	1076.83	0.933228	0.23027	15.5319	8.11267e-05	0.000387195
Thr-AGT-7-1	250.862	0.695838	0.17596	15.1723	9.81315e-05	0.000457947
Lys-TTT-3-1	661.475	0.702311	0.181667	14.3949	0.000148206	0.000676591
Leu-TAG-1-1	7803.63	0.381285	0.101523	13.8281	0.000200321	0.000895052
Arg-CCG-1-1	24350.2	0.60595	0.161223	13.648	0.000220481	0.000964605
Ser-AGA-2	1362.71	0.660035	0.176084	13.5476	0.000232584	0.000996791
Glu-TTC-1	52255.6	0.330542	0.0912236	12.9054	0.000327632	0.00137606
Arg-CCT-2	7817.65	0.693855	0.190701	12.7153	0.000362671	0.00149335
Lys-TTT-5-1	124.847	0.742196	0.207515	12.4523	0.000417472	0.00168594
Cys-GCA-10-1	85.2608	0.868948	0.243505	12.3418	0.000442921	0.00175497
Glu-CTC-2-1	52.8139	0.699742	0.200842	12.1523	0.000490267	0.0019066
Tyr-GTA-3	827.923	0.467913	0.133098	12.0833	0.000508745	0.00194248
Arg-TCG-2-1	34946.8	0.402761	0.115273	11.9486	0.000546888	0.00204139
Gln-CTG-2	417648	0.636066	0.181107	11.8918	0.000563812	0.00204139
Ser-GCT-5-1	955.336	0.609911	0.17385	11.9153	0.000556762	0.00204139
Val-AAC-5-1	960.179	0.487642	0.140674	11.7286	0.000615481	0.0021907
Arg-TCT-2-1	5531.32	0.642968	0.184587	11.6966	0.000626149	0.00219152
Ser-CGA-2-1	117067	0.612024	0.177135	11.5281	0.000685534	0.00236003
Thr-AGT-4-1	20319.9	0.487256	0.145962	10.8504	0.000987771	0.00334568
Thr-AGT-1	393.035	0.681007	0.205421	10.6072	0.00112646	0.00375487
Gln-CTG-5-1	101.434	0.972909	0.296174	10.2957	0.0013334	0.00430791
Phe-GAA-1	106781	0.475684	0.146269	10.3044	0.00132715	0.00430791
Ala-TGC-5	138.728	0.735917	0.226994	10.1838	0.00141681	0.00450804
Gly-CCC-1	55034.3	0.281889	0.0881752	10.0739	0.00150382	0.00451145
Ile-AAT-2-1	36.2967	0.79853	0.250767	10.1118	0.00147323	0.00451145
Ile-TAT-2	30069.8	0.483647	0.149786	10.1534	0.00144038	0.00451145
Val-AAC-1	84.818	0.731923	0.227931	10.0788	0.00149984	0.00451145
Gly-CCC-3-1	655.408	0.732623	0.227229	9.97739	0.00158474	0.00468725
Arg-CCT-1-1	3130.61	0.456492	0.144916	9.68558	0.0018572	0.00534264
Tyr-GTA-2-1	603.19	0.396432	0.126198	9.70004	0.00184264	0.00534264
Ala-AGC-6-1	16238.9	0.36476	0.116903	9.55123	0.00199815	0.00567043
Gln-CTG-1-1	184.59	0.74284	0.241482	9.13003	0.00251448	0.00704053
Ala-AGC-4	85192.7	0.345392	0.114411	8.94998	0.00277473	0.00766701
Asn-GTT-1-1	549.818	0.411215	0.137298	8.81015	0.00299559	0.00806505
Gly-GCC-2	1019.65	0.298659	0.0999756	8.81286	0.00299115	0.00806505
Ile-TAT-1-1	15063.7	0.464563	0.156495	8.59277	0.00337501	0.00897154
Thr-AGT-2-1	53658.3	0.444809	0.150212	8.56004	0.00343622	0.00902009
Val-CAC-7-1	14.6924	1.24228	0.427863	8.37364	0.00380701	0.00987003
Cys-GCA-18-1	59.6559	0.696647	0.246369	7.86668	0.0050354	0.0125885
Gln-CTG-4-1	497.59	0.61778	0.216651	7.87131	0.00502252	0.0125885
His-GTG-1-1	29.7665	1.09863	0.384245	7.90037	0.00494248	0.0125885
Arg-ACG-1	112830	0.434362	0.156027	7.57033	0.0059337	0.0144893
Ala-AGC-7-1	5445.72	0.357869	0.129309	7.51887	0.00610561	0.0147377
Ala-CGC-5-1	18.25	0.926993	0.340648	7.44052	0.00637716	0.0150472
Ile-AAT-1	51516	0.384193	0.139378	7.44482	0.00636192	0.0150472
Ser-TGA-2	9198.81	0.503142	0.182976	7.35509	0.00668731	0.0156037
Arg-ACG-3	53841.5	0.455024	0.166041	7.32647	0.00679463	0.0156799
Lys-CTT-1-1	106.356	0.754623	0.282457	6.90005	0.00861936	0.0196746
Arg-TCG-1-1	89804.5	0.373421	0.141277	6.84965	0.00886585	0.0200197
His-GTG-2	4596.28	0.438433	0.166592	6.76598	0.00929119	0.0207569
Ser-GCT-4	1214.74	0.492398	0.187462	6.72274	0.00951915	0.0210423
Ala-CGC-1	13477.2	0.369405	0.142281	6.611	0.0101351	0.021515
Ala-TGC-7	433.722	0.638398	0.244179	6.60799	0.0101522	0.021515
Arg-TCT-3-1	8911.77	0.475785	0.182428	6.62815	0.0100379	0.021515
Trp-CCA-3	16.4311	1.19522	0.459138	6.59175	0.0102452	0.021515
Leu-CAA-3-1	11666.4	0.297216	0.115379	6.53582	0.0105724	0.0219822
Sup-TCA-1-1	48.259	0.916889	0.35316	6.50155	0.010778	0.0221901
Ile-AAT-3-1	81.5938	0.563742	0.219715	6.48136	0.0109011	0.0222256
Met-CAT-5-1	53.7086	0.707765	0.276692	6.41157	0.0113379	0.0228939
Leu-CAG-1	7737.75	0.332001	0.13267	6.15572	0.0130988	0.0259504
Val-TAC-1	20961.5	0.304488	0.121717	6.16076	0.0130615	0.0259504
Met-CAT-2	22893.2	0.40558	0.163052	6.05474	0.013869	0.0272196
Lys-CTT-4-1	3029.86	0.511209	0.206953	5.93406	0.014851	0.0288769
Pro-AGG-1	1352.32	0.597278	0.243146	5.83746	0.0156884	0.0302254
Cys-GCA-12-1	17.5885	0.833521	0.349027	5.69883	0.0169762	0.0324091
Trp-CCA-2-1	9564.1	0.40041	0.16752	5.59291	0.0180333	0.0338124
iMet-CAT-2-1	575.554	0.247353	0.105788	5.42115	0.0198942	0.0369716
Met-CAT-1	76580.9	0.339899	0.144901	5.40545	0.020074	0.0369784
Trp-CCA-5-1	30738	0.352519	0.150458	5.3889	0.0202652	0.0370061
Gln-TTG-1-1	7053.2	0.393512	0.168828	5.32088	0.0210713	0.038034
Lys-CTT-14-1	61.9382	0.845557	0.36023	5.31107	0.0211904	0.038034
Leu-CAG-4-1	946.022	0.290099	0.128168	5.05637	0.0245355	0.043298
iMet-CAT-1	89499.1	0.232093	0.102506	5.06699	0.0243857	0.043298
Ala-CGC-4-1	11.1982	1.30938	0.587087	4.82865	0.0279906	0.0485787
Gln-TTG-3	4997.98	0.35991	0.163728	4.74236	0.0294287	0.0501323
Ser-AGA-1-1	90.3115	0.586195	0.266069	4.74709	0.0293479	0.0501323
Thr-TGT-2-1	765.558	0.41399	0.188317	4.73226	0.0296019	0.0501323
Thr-CGT-2-1	22329.4	0.337152	0.154244	4.69454	0.0302586	0.0508345
Ala-AGC-8-1	43.8701	0.511983	0.236216	4.67524	0.0306005	0.0510008
His-GTG-3-1	20.1432	0.794638	0.369452	4.56796	0.0325753	0.0538646
Leu-AAG-1	4623.2	0.308016	0.143475	4.53697	0.0331702	0.0544199
Glu-TTC-3	161.695	0.340013	0.167152	4.10264	0.0428163	0.0697009
Asn-GTT-3	522229	0.289319	0.142862	4.04062	0.0444175	0.0717513
Cys-GCA-14-1	63.417	0.437043	0.221865	3.85671	0.0495475	0.0788256
Gly-TCC-1	57824.9	0.206106	0.104252	3.86853	0.0491995	0.0788256
Cys-GCA-24-1	12.3756	0.828875	0.423114	3.8366	0.050145	0.0791764
Leu-CAA-1-1	1914.37	0.250011	0.127973	3.77113	0.0521444	0.0811135
Ser-CGA-1-1	9361.59	0.230284	0.117796	3.77825	0.0519231	0.0811135
Thr-TGT-1-1	32095.1	0.265382	0.13977	3.55667	0.0593067	0.0915765
Ser-GCT-3-1	127897	0.327323	0.174896	3.44332	0.0635079	0.0973479
Val-CAC-5-1	18.9721	0.616342	0.33483	3.38476	0.0658017	0.100133
Gly-GCC-3-1	1042.41	0.210568	0.11441	3.35629	0.0669487	0.101146
Val-CAC-4-1	47.338	0.468435	0.257164	3.2855	0.0698945	0.104842
Lys-TTT-1	454522	0.371564	0.204243	3.2451	0.0716372	0.105976
Thr-CGT-1-1	21145.2	0.262193	0.144593	3.24459	0.0716596	0.105976
SeC-TCA-1-1	11526.4	0.240645	0.133302	3.21988	0.0727491	0.106834
iMet-CAT-3-1	1437.82	0.210148	0.117633	3.16136	0.0754005	0.109959
Leu-CAG-3-1	20.706	0.620101	0.350329	3.11783	0.0774399	0.112154
Lys-CTT-3	85829.2	0.33375	0.189465	3.04936	0.080769	0.116175
Ala-CGC-2-1	17039	0.210225	0.121728	2.95149	0.0857983	0.121841
Leu-CAA-2-1	12075	0.184847	0.107132	2.95017	0.0858686	0.121841
Ala-TGC-8-1	31.4938	0.524915	0.308878	2.85573	0.0910486	0.128034
Arg-CCT-4-1	67865.3	0.323825	0.190253	2.84861	0.0914527	0.128034
Glu-TTC-2	40376.6	0.14776	0.0895141	2.70525	0.100019	0.139099
Ser-GCT-2-1	23242	0.30039	0.182206	2.67619	0.101859	0.140727
Val-CAC-2	23665.2	0.220055	0.138887	2.48285	0.115094	0.157972
Glu-CTC-1	131309	0.157264	0.100411	2.43414	0.118719	0.161889
Pro-TGG-1-1	21412.3	0.374444	0.240809	2.37038	0.123657	0.167536
Cys-GCA-16-1	12.9671	0.64586	0.423208	2.32217	0.127542	0.171691
Pro-TGG-2	27394.2	0.356718	0.238343	2.19831	0.138162	0.184802
Ala-TGC-2	24162.1	0.162491	0.112762	2.06002	0.151208	0.199709
Leu-AAG-2-1	291.813	0.226256	0.156755	2.06647	0.15057	0.199709
Arg-CCG-3-1	56356.2	0.251199	0.175443	2.02405	0.154825	0.201044
Cys-GCA-5-1	56.3229	0.327818	0.230793	2.02145	0.155091	0.201044
Gly-CCC-2	166.301	0.390958	0.2724	2.02302	0.15493	0.201044
Lys-CTT-7-1	16.4784	0.507591	0.361329	1.97119	0.160321	0.205787
Pro-CGG-1	20412.7	0.330406	0.233531	1.96754	0.16071	0.205787
Gly-GCC-4-1	17156.3	0.133089	0.0970744	1.86763	0.171747	0.218587
Cys-GCA-15-1	68.1056	0.347784	0.255263	1.83988	0.174965	0.221341
Leu-TAG-3-1	10623.4	0.131844	0.0987735	1.7705	0.183321	0.230523
Ala-CGC-3	45.4532	0.365378	0.313222	1.3474	0.245733	0.305349
Thr-TGT-3	3860.92	0.204113	0.18444	1.21235	0.270866	0.3346
Cys-GCA-7-1	56.4034	0.239082	0.219501	1.19493	0.274337	0.334946
Gly-ACC-1-1	25.7925	0.390983	0.355784	1.20067	0.273188	0.334946
Leu-CAG-2	19730.3	0.11667	0.107113	1.17978	0.277401	0.336729
Thr-AGT-3-1	14.2094	0.423673	0.397326	1.13665	0.286361	0.345608
Lys-CTT-6-1	77.1145	0.236072	0.232792	1.02299	0.311812	0.372048
Arg-TCT-1-1	16118.4	0.15565	0.15898	0.951276	0.329395	0.388612
Gln-TTG-5-1	55.8603	0.279252	0.299261	0.864379	0.352516	0.411269
Cys-GCA-17-1	78.5806	0.195379	0.218082	0.802678	0.370294	0.429623
Asp-GTC-1	315440	0.190474	0.220974	0.73599	0.390948	0.448629
Cys-GCA-8-1	817.783	0.124336	0.145213	0.729278	0.393117	0.448667
Ala-AGC-10-1	15.5656	0.355331	0.43024	0.677519	0.410442	0.465907
Lys-CTT-2	34937.2	0.156486	0.191397	0.663356	0.415378	0.466467
Ala-TGC-6-1	5051.27	0.0951195	0.117681	0.650436	0.419957	0.469101
Asp-GTC-4-1	12.2401	0.36396	0.468141	0.604672	0.436801	0.485334
Cys-GCA-3	1526.09	-0.100269	0.180145	0.311092	0.577011	0.63441
Lys-CTT-5-1	19.6463	0.153586	0.375264	0.16753	0.682316	0.744896
Arg-TCT-4-1	7499.02	0.0252499	0.153762	0.026935	0.869638	0.913119
Ser-CGA-3-1	1093.98	-0.0193552	0.184089	0.0110661	0.916221	0.94823
Asp-GTC-2-1	66069.7	0.0212339	0.226351	0.00879112	0.925299	0.951481
Cys-GCA-2-1	353.328	0.0160671	0.182242	0.00797827	0.928827	0.951481
Cys-GCA-21-1	9.1684	0.0106483	0.447239	0.00137313	0.970441	0.987793
Arg-CCG-2-1	15363	-0.0033193	0.153888	0.000465383	0.982789	0.992239
Ala-TGC-MT	7207.46	-0.00399331	0.121072	0.00108845	0.973681	0.987793
Arg-TCG-MT	13967.1	-0.0727151	0.118158	0.379954	0.537628	0.594221
Asn-GTT-MT	13692.8	-0.0206845	0.197677	0.0109597	0.916623	0.94823
Asp-GTC-MT	14637.4	-0.0237565	0.103557	0.0526829	0.818459	0.8637
Cys-GCA-MT	8481.18	-0.0442378	0.157733	0.0788129	0.778913	0.834549
Gln-TTG-MT	13508.3	-0.166719	0.204248	0.671069	0.412679	0.465928
Glu-TTC-MT	8116.71	-0.0328761	0.127996	0.0660721	0.797144	0.845456
Gly-TCC-MT	20505.2	-0.0155791	0.103774	0.0225549	0.88062	0.920051
His-GTG-MT	10235.7	0.175739	0.170201	1.057	0.303901	0.364681
Ile-GAT-MT	16693.1	0.211255	0.212197	0.980703	0.322025	0.382064
Leu1-TAA-MT	10120.5	0.0417716	0.161374	0.0668721	0.795947	0.845456
Leu2-TAG-MT	23482.9	-0.101962	0.10838	0.889067	0.34573	0.405605
Lys-TTT-MT	41823.4	-0.0640286	0.0745398	0.739973	0.38967	0.448629
Met-CAT-MT	25535.8	-0.0371384	0.11058	0.112988	0.736768	0.797532
Phe-GAA-MT	63173.3	0.432112	0.165315	6.67486	0.00977824	0.0213899
Pro-TGG-MT	42099.9	-0.000534313	0.112742	2.2499e-05	0.996215	0.997645
Ser1-TGA-MT	22559.9	0.353581	0.12634	7.68865	0.00555691	0.0137288
Ser2-GCT-MT	25599	-0.105625	0.0828624	1.63241	0.20137	0.251712
Thr-TGT-MT	24737	0.000378619	0.128446	8.71123e-06	0.997645	0.997645
Trp-TCA-MT	123856	-0.0759845	0.187381	0.164999	0.684595	0.744896
Tyr-GTA-MT	35540.1	0.285066	0.126342	5.01702	0.0250993	0.0439237
Val-TAC-MT	94493.9	-0.18269	0.077393	5.61577	0.0177996	0.0336749
ecoliSpikeIn_Gln	15572	0.0473894	0.154289	0.0941302	0.758991	0.817375

## Sheet: sig_LRT_Ca tRNA
	tRNA isodecoder	baseMean	log2FoldChange	lfcSE	stat	pvalue	padj
1	Ala-AGC-1-1	560.993	2.02208	0.140929	183.61	7.89402e-42	1.65774e-39
2	Ala-AGC-2	11869.2	0.753551	0.122177	36.3907	1.61469e-09	2.11928e-08
3	Ala-AGC-3-1	10687	0.666783	0.0929801	49.5159	1.96772e-12	3.44351e-11
4	Ala-AGC-4	85192.7	0.345392	0.114411	8.94998	0.00277473	0.00766701
5	Ala-AGC-5	6335.77	1.51245	0.176636	65.9698	4.57885e-16	1.92312e-14
6	Ala-AGC-6-1	16238.9	0.36476	0.116903	9.55123	0.00199815	0.00567043
7	Ala-AGC-7-1	5445.72	0.357869	0.129309	7.51887	0.00610561	0.0147377
8	Ala-CGC-1	13477.2	0.369405	0.142281	6.611	0.0101351	0.021515
9	Ala-CGC-4-1	11.1982	1.30938	0.587087	4.82865	0.0279906	0.0485787
10	Ala-CGC-5-1	18.25	0.926993	0.340648	7.44052	0.00637716	0.0150472
11	Ala-TGC-1-1	4352.91	0.714415	0.120895	33.5246	7.03676e-09	7.03676e-08
12	Ala-TGC-4-1	9751.9	0.634748	0.118006	27.9103	1.27069e-07	1.02633e-06
13	Ala-TGC-5	138.728	0.735917	0.226994	10.1838	0.00141681	0.00450804
14	Ala-TGC-7	433.722	0.638398	0.244179	6.60799	0.0101522	0.021515
15	Arg-ACG-1	112830	0.434362	0.156027	7.57033	0.0059337	0.0144893
16	Arg-ACG-2-1	18931.2	0.993874	0.160487	36.0245	1.94848e-09	2.40695e-08
17	Arg-ACG-3	53841.5	0.455024	0.166041	7.32647	0.00679463	0.0156799
18	Arg-CCG-1-1	24350.2	0.60595	0.161223	13.648	0.000220481	0.000964605
19	Arg-CCT-1-1	3130.61	0.456492	0.144916	9.68558	0.0018572	0.00534264
20	Arg-CCT-2	7817.65	0.693855	0.190701	12.7153	0.000362671	0.00149335
21	Arg-CCT-3-1	2034.87	0.784022	0.130451	34.5514	4.15149e-09	4.35906e-08
22	Arg-TCG-1-1	89804.5	0.373421	0.141277	6.84965	0.00886585	0.0200197
23	Arg-TCG-2-1	34946.8	0.402761	0.115273	11.9486	0.000546888	0.00204139
24	Arg-TCG-3	116097	0.703088	0.153659	20.0916	7.38204e-06	4.55949e-05
25	Arg-TCG-4-1	11950	0.7391	0.149936	23.2662	1.41057e-06	9.55547e-06
26	Arg-TCT-2-1	5531.32	0.642968	0.184587	11.6966	0.000626149	0.00219152
27	Arg-TCT-3-1	8911.77	0.475785	0.182428	6.62815	0.0100379	0.021515
28	Arg-TCT-5-1	856.744	1.17972	0.173125	43.2476	4.82329e-11	7.23493e-10
29	Asn-GTT-1-1	549.818	0.411215	0.137298	8.81015	0.00299559	0.00806505
30	Asn-GTT-2-1	1154.12	0.781564	0.177727	18.5019	1.69737e-05	9.63372e-05
31	Cys-GCA-10-1	85.2608	0.868948	0.243505	12.3418	0.000442921	0.00175497
32	Cys-GCA-12-1	17.5885	0.833521	0.349027	5.69883	0.0169762	0.0324091
33	Cys-GCA-18-1	59.6559	0.696647	0.246369	7.86668	0.0050354	0.0125885
34	Cys-GCA-9-1	94.3129	0.885286	0.218951	15.8756	6.76454e-05	0.000330361
35	Gln-CTG-1-1	184.59	0.74284	0.241482	9.13003	0.00251448	0.00704053
36	Gln-CTG-2	417648	0.636066	0.181107	11.8918	0.000563812	0.00204139
37	Gln-CTG-3	663.269	0.89506	0.203594	18.362	1.82668e-05	0.000100948
38	Gln-CTG-4-1	497.59	0.61778	0.216651	7.87131	0.00502252	0.0125885
39	Gln-CTG-5-1	101.434	0.972909	0.296174	10.2957	0.0013334	0.00430791
40	Gln-TTG-1-1	7053.2	0.393512	0.168828	5.32088	0.0210713	0.038034
41	Gln-TTG-2-1	312.623	1.07092	0.201952	26.5449	2.57489e-07	1.93117e-06
42	Glu-CTC-2-1	52.8139	0.699742	0.200842	12.1523	0.000490267	0.0019066
43	Glu-TTC-1	52255.6	0.330542	0.0912236	12.9054	0.000327632	0.00137606
44	Gly-CCC-1	55034.3	0.281889	0.0881752	10.0739	0.00150382	0.00451145
45	Gly-CCC-3-1	655.408	0.732623	0.227229	9.97739	0.00158474	0.00468725
46	Gly-GCC-1	5067.18	1.12408	0.145195	55.781	8.10092e-14	1.89022e-12
47	Gly-GCC-2	1019.65	0.298659	0.0999756	8.81286	0.00299115	0.00806505
48	His-GTG-1-1	29.7665	1.09863	0.384245	7.90037	0.00494248	0.0125885
49	His-GTG-2	4596.28	0.438433	0.166592	6.76598	0.00929119	0.0207569
50	Ile-AAT-1	51516	0.384193	0.139378	7.44482	0.00636192	0.0150472
51	Ile-AAT-2-1	36.2967	0.79853	0.250767	10.1118	0.00147323	0.00451145
52	Ile-AAT-3-1	81.5938	0.563742	0.219715	6.48136	0.0109011	0.0222256
53	Ile-TAT-1-1	15063.7	0.464563	0.156495	8.59277	0.00337501	0.00897154
54	Ile-TAT-2	30069.8	0.483647	0.149786	10.1534	0.00144038	0.00451145
55	Leu-AAG-3-1	723.848	0.994518	0.147488	43.0493	5.33782e-11	7.47295e-10
56	Leu-CAA-3-1	11666.4	0.297216	0.115379	6.53582	0.0105724	0.0219822
57	Leu-CAA-4-1	589.73	1.54105	0.187554	61.2948	4.9137e-15	1.7198e-13
58	Leu-CAG-1	7737.75	0.332001	0.13267	6.15572	0.0130988	0.0259504
59	Leu-CAG-4-1	946.022	0.290099	0.128168	5.05637	0.0245355	0.043298
60	Leu-TAA-1-1	18208.1	0.85927	0.147675	32.1325	1.44005e-08	1.37459e-07
61	Leu-TAA-2-1	80903.2	0.516466	0.12549	16.4603	4.96801e-05	0.0002484
62	Leu-TAG-1-1	7803.63	0.381285	0.101523	13.8281	0.000200321	0.000895052
63	Leu-TAG-2-1	1335.71	0.765384	0.142045	27.8281	1.32586e-07	1.03123e-06
64	Lys-CTT-1-1	106.356	0.754623	0.282457	6.90005	0.00861936	0.0196746
65	Lys-CTT-14-1	61.9382	0.845557	0.36023	5.31107	0.0211904	0.038034
66	Lys-CTT-4-1	3029.86	0.511209	0.206953	5.93406	0.014851	0.0288769
67	Lys-TTT-2	13698.6	1.28929	0.17579	49.3233	2.17073e-12	3.50657e-11
68	Lys-TTT-3-1	661.475	0.702311	0.181667	14.3949	0.000148206	0.000676591
69	Lys-TTT-5-1	124.847	0.742196	0.207515	12.4523	0.000417472	0.00168594
70	Met-CAT-1	76580.9	0.339899	0.144901	5.40545	0.020074	0.0369784
71	Met-CAT-2	22893.2	0.40558	0.163052	6.05474	0.013869	0.0272196
72	Met-CAT-3-1	7256.62	0.930433	0.17917	25.4624	4.5109e-07	3.15763e-06
73	Met-CAT-4-1	805.944	2.16449	0.216512	85.5048	2.31138e-20	1.8094e-18
74	Met-CAT-5-1	53.7086	0.707765	0.276692	6.41157	0.0113379	0.0228939
75	Met-CAT-6-1	100.885	1.19332	0.257173	20.431	6.18206e-06	4.05698e-05
76	Phe-GAA-1	106781	0.475684	0.146269	10.3044	0.00132715	0.00430791
77	Phe-GAA-2-1	5234.04	1.04058	0.168719	35.6219	2.39576e-09	2.64795e-08
78	Phe-GAA-3-1	9995.85	0.722364	0.157756	20.0996	7.3512e-06	4.55949e-05
79	Pro-AGG-1	1352.32	0.597278	0.243146	5.83746	0.0156884	0.0302254
80	Pro-TGG-3-1	1076.83	0.933228	0.23027	15.5319	8.11267e-05	0.000387195
81	Ser-AGA-2	1362.71	0.660035	0.176084	13.5476	0.000232584	0.000996791
82	Ser-AGA-3-1	168.516	0.749767	0.173776	18.1329	2.0601e-05	0.000110928
83	Ser-CGA-2-1	117067	0.612024	0.177135	11.5281	0.000685534	0.00236003
84	Ser-GCT-1-1	4186.83	1.43716	0.228886	35.7079	2.29232e-09	2.64795e-08
85	Ser-GCT-4	1214.74	0.492398	0.187462	6.72274	0.00951915	0.0210423
86	Ser-GCT-5-1	955.336	0.609911	0.17385	11.9153	0.000556762	0.00204139
87	Ser-GGA-1-1	306.443	0.801851	0.193473	16.501	4.86233e-05	0.0002484
88	Ser-TGA-1-1	233918	0.679259	0.162476	16.8004	4.1525e-05	0.000218006
89	Ser-TGA-2	9198.81	0.503142	0.182976	7.35509	0.00668731	0.0156037
90	Sup-TCA-1-1	48.259	0.916889	0.35316	6.50155	0.010778	0.0221901
91	Thr-AGT-1	393.035	0.681007	0.205421	10.6072	0.00112646	0.00375487
92	Thr-AGT-2-1	53658.3	0.444809	0.150212	8.56004	0.00343622	0.00902009
93	Thr-AGT-4-1	20319.9	0.487256	0.145962	10.8504	0.000987771	0.00334568
94	Thr-AGT-5-1	3422.09	1.14301	0.150904	53.3431	2.80094e-13	5.88197e-12
95	Thr-AGT-6-1	5201.84	1.36073	0.147507	77.6586	1.22483e-18	6.43036e-17
96	Thr-AGT-7-1	250.862	0.695838	0.17596	15.1723	9.81315e-05	0.000457947
97	Thr-CGT-3-1	13522.4	0.61008	0.134885	19.7623	8.76965e-06	5.26179e-05
98	Thr-CGT-4-1	2904.35	0.797421	0.151708	26.3691	2.82017e-07	2.04219e-06
99	Trp-CCA-2-1	9564.1	0.40041	0.16752	5.59291	0.0180333	0.0338124
100	Trp-CCA-3	16.4311	1.19522	0.459138	6.59175	0.0102452	0.021515
101	Trp-CCA-5-1	30738	0.352519	0.150458	5.3889	0.0202652	0.0370061
102	Trp-CCA-6-1	40.6942	1.66028	0.36342	19.6473	9.31338e-06	5.43281e-05
103	Tyr-GTA-1	85862.5	1.05123	0.182993	30.8512	2.78595e-08	2.54369e-07
104	Tyr-GTA-2-1	603.19	0.396432	0.126198	9.70004	0.00184264	0.00534264
105	Tyr-GTA-3	827.923	0.467913	0.133098	12.0833	0.000508745	0.00194248
106	Tyr-GTA-4-1	9931.71	0.620757	0.11274	29.2738	6.28404e-08	5.49854e-07
107	Tyr-GTA-5-1	799.349	0.871681	0.159996	28.2852	1.04696e-07	8.79445e-07
108	Val-AAC-1	84.818	0.731923	0.227931	10.0788	0.00149984	0.00451145
109	Val-AAC-2	1799.06	1.32217	0.13728	85.2837	2.58485e-20	1.8094e-18
110	Val-AAC-4-1	1592.34	1.18364	0.149942	57.907	2.74813e-14	8.24438e-13
111	Val-AAC-5-1	960.179	0.487642	0.140674	11.7286	0.000615481	0.0021907
112	Val-CAC-1-1	1284.07	1.43928	0.183289	56.0876	6.93122e-14	1.81944e-12
113	Val-CAC-3-1	1951.58	0.988989	0.135171	50.4733	1.20796e-12	2.30611e-11
114	Val-CAC-7-1	14.6924	1.24228	0.427863	8.37364	0.00380701	0.00987003
115	Val-TAC-1	20961.5	0.304488	0.121717	6.16076	0.0130615	0.0259504
116	iMet-CAT-1	89499.1	0.232093	0.102506	5.06699	0.0243857	0.043298
117	iMet-CAT-2-1	575.554	0.247353	0.105788	5.42115	0.0198942	0.0369716
118	Phe-GAA-MT	63173.3	0.432112	0.165315	6.67486	0.00977824	0.0213899
119	Ser1-TGA-MT	22559.9	0.353581	0.12634	7.68865	0.00555691	0.0137288
120	Tyr-GTA-MT	35540.1	0.285066	0.126342	5.01702	0.0250993	0.0439237
121	Val-TAC-MT	94493.9	-0.18269	0.077393	5.61577	0.0177996	0.0336749

## Sheet: norm counts_Ca decoders
tRNA decoder	KI_1	KI_2	KI_3	KI_4	WT_1	WT_2	WT_3	WT_4	WT_5	WT_6
Ala-AGC	99453.8	118316	119049	108623	147367	151092	162565	175120	149041	133271
Ala-CGC	21737	28345.4	31860.3	26451.2	32916.8	31769.2	35836.8	35882	33340.4	27771.9
Ala-TGC	32678.9	39680	43367.2	37550.2	46215.5	47035.3	49970.8	51590.3	49519.9	41613.3
Arg-ACG	198409	149953	117071	130959	249705	200315	231379	183793	196825	197613
Arg-CCG	110446	83302.2	70648.7	73641.3	126937	97601.6	96407.2	86301.1	99621	115787
Arg-CCT	90194.7	63529.9	57766.9	63092.2	112445	91049.6	73158.3	68337.2	80259.3	108651
Arg-TCG	241266	209979	154764	187673	333676	269651	296568	272025	274787	287597
Arg-TCT	46880.2	33495.2	29005.7	28018.2	47854.3	40703.8	39806.3	36664	41245.9	45498.8
Asn-GTT	603533	459776	382792	402271	648581	515845	594696	520617	545691	565528
Asp-GTC	594695	291921	264060	274563	487050	389630	359954	318674	375077	459590
Cys-GCA	3653.46	2583.48	3709.25	2854.03	4473.48	3419.42	2947.54	2979.32	3016.32	3477.34
Gln-CTG	397280	354894	218952	286682	667326	439693	478319	478192	426883	442729
Gln-TTG	12725.8	9370.35	11298.2	8384.97	18249.9	14537.3	11381.6	11536.8	12980.8	13730.8
Glu-CTC	134397	112789	124846	119407	146779	138074	131820	124834	152768	127904
Glu-TTC	86121.3	80299.5	86707.7	80171.7	91920	100946	98360.6	96531.7	112010	94869.4
Gly-ACC	19.1899	32.9893	13.3008	21.0847	37.9645	41.395	26.511	32.2223	15.1956	18.0724
Gly-CCC	49011	45960.3	54491.6	47879.2	59621.7	65099.8	59252.1	59499.6	61295.2	56449.6
Gly-GCC	20395.2	19751.7	22765.1	21218.8	25689.3	27427.5	25594	27072.9	29250.2	23690.8
Gly-TCC	53595.9	47343.8	58307.3	52540.6	54265.5	67377.5	58485.7	62544.6	65751.3	58036.8
His-GTG	2765.56	3615.77	4690.18	4212.73	4691.78	6602.98	4938.27	5528.59	5175.36	4240.63
Ile-AAT	35301.3	45282.7	49193.7	44753.6	55029.6	66427.3	59846.1	62127	53981.1	44396.4
Ile-TAT	27079.9	39497.9	42845.1	36729.6	45266.3	58495.9	53936.6	56514.1	48910.8	42059.8
iMet-CAT	89811.6	79573.7	82374.2	79629.4	91980.1	107536	94098.3	87904.8	109764	92452
Leu-AAG	4293.37	4562.84	5033.51	5164.91	7222.75	6971.68	4908.15	5952.44	6567.03	5711.94
Leu-CAA	20240.9	23977.1	24988	24442.2	26668.5	28101.4	30018.9	31551.8	28529.7	23936.4
Leu-CAG	23640.5	23926.9	29239.3	28514.1	29275.4	33155.4	26803.8	31300.2	31216.8	27275.5
Leu-TAA	71732.5	88289.8	66542.9	79552.6	119147	126888	118775	123497	104051	92637
Leu-TAG	15850.8	17505	19957.8	17055.8	20663.8	22139.6	20942.5	22260.6	22155.2	19096.1
Lys-CTT	161118	98176.3	98542.9	80391.8	165252	126514	121881	108138	135965	144800
Lys-TTT	557367	408497	269125	342302	696220	571199	451979	458787	407057	527535
Met-CAT	70998.2	104766	88662.9	96657.4	109493	133952	132480	136476	109137	94290
Phe-GAA	83786.7	104069	96565.3	103186	148057	154686	139839	165653	123103	101159
Pro-AGG	1511.57	1101.71	729.049	792.785	2451.87	1833.89	1297.83	1357.05	1114.34	1333.1
Pro-CGG	28443.8	14856.2	13975.8	13452	31776.3	22661.3	18789.1	16790.3	18124.5	25257.8
Pro-TGG	68972.1	36907.5	32274.3	31140.4	77305.2	60603.2	47566.7	41575.4	42707.2	59781.3
SeC-TCA	12849.8	8829.46	9789.37	10108.9	12216.7	12115.2	10911.7	10968	13170.8	14303.8
Ser-AGA	1655.5	1092.08	982.594	1066.04	2377.53	2102.48	1961.81	1638.38	1601.87	1737.08
Ser-CGA	127061	105075	71700.3	90040.2	192488	133801	146594	145356	134606	128507
Ser-GCT	197023	120849	113993	108617	210349	160231	182023	151692	163429	166754
Ser-GGA	188.209	208.932	231.932	218.438	378.063	384.107	381.999	513.077	334.303	225.373
Ser-TGA	197211	121058	114225	108835	210727	160615	182405	152206	163763	166979
Sup-TCA	43.5463	35.7384	24.1076	21.9281	105.984	75.0885	56.6371	34.7009	25.326	59.5326
Thr-AGT	65445.6	72189.6	65929.4	58914.1	126982	92897	95962.6	80980.7	81823.2	91479.3
Thr-CGT	56698.7	53955.4	44664.8	46513.7	80478.4	66079.8	74703.1	60507.2	56218.6	59193.5
Thr-TGT	35160.3	35486.2	30821.2	29738.7	52748.5	38284.6	38463.8	35165.6	34036.9	37309.9
Trp-CCA	25522.5	36476.6	37166.5	38481.3	41642.3	51579.1	45592.9	51685.7	39640.2	35804.6
Tyr-GTA	56422.7	75374.4	49008.4	65072.5	155106	132322	129433	128147	99860.3	89500.9
Val-AAC	2307.21	2881.76	3035.9	2511.61	5492.2	5880.97	5789.04	6196.59	5851.57	4417.1
Val-CAC	19467.4	22555.8	28551.8	23253.9	27891.3	34814.1	28519.8	30427.7	29922.6	24413.7
Val-TAC	15992.6	18795	20526.4	18173.3	20192.4	27287.9	22227.1	24237.3	21739.8	20443.1
Ala-TGC-MT	6710.56	6978.62	7624.67	7565.2	5947.77	7015	7349.57	8723.55	7554.74	6604.93
Arg-TCG-MT	13783.5	12487.2	16566.9	14730.6	11712.1	13933.7	13084.4	15513.8	14519.4	13339.6
Asn-GTT-MT	19942.7	12439.7	12238.4	10620.8	17424.1	11693.6	12366.2	10068.2	14368.7	15765.5
Asp-GTC-MT	16288.5	13694	15964.3	13181.3	14959.6	14210	15978.9	14474	14416.8	13206.7
Cys-GCA-MT	8346.86	8837.02	8312.98	9052.09	9144.7	5220.58	9129.42	8669.02	9314.9	8784.25
Gln-TTG-MT	22283.9	13048.7	12616.6	9869.33	14363.2	12347.2	12097.4	9980.22	12920	15556.1
Glu-TTC-MT	7032.36	7819.16	9106.04	8955.94	6789.32	8182.72	7370.06	9640.65	8401.89	7868.93
Gly-TCC-MT	19449.7	20115.2	22715.2	20275.9	18446	23480.6	19522.9	20705.3	18923.6	21417.9
His-GTG-MT	9692.37	10080.3	9374.55	8844.62	8722.35	15950.5	11256.3	10313.6	8970.46	9152.07
Ile-GAT-MT	16014.7	13975.1	15311.7	15697.1	31134.1	16249	15100.4	14765.2	13796.3	14887.4
Leu1-TAA-MT	9113.72	9475.5	8652.98	12539.5	8920.08	8807.5	9519.86	8933	12254	12988.7
Leu2-TAG-MT	23574.8	25335.1	26795.2	22238.5	19377.7	24271.9	23832.2	21062.2	24575.1	23766.3
Lys-TTT-MT	44517.6	41482	42905	42863.5	41438.3	40779.8	40843.8	39189.7	40216.4	43997.8
Met-CAT-MT	27003.1	23195.6	27013.9	26514.4	24224.5	27354.4	23414	21704.2	26294.7	28639.4
Phe-GAA-MT	48521.6	59820	48586.9	51990.7	82269.1	87038.2	69290.1	72378.6	46193.3	65644.2
Pro-TGG-MT	44539	40398.2	39899.8	43599	43720.9	34273.1	40238.9	42470.2	43151.7	48708.3
Ser1-TGA-MT	17812.6	22135.2	16621.8	20780.3	27252.2	28293.9	22087.3	25233.7	21777.8	23604.7
Ser2-GCT-MT	24556.4	29034.1	27033	26301.9	24665.9	25322.2	26082	24845.8	23795	24354.1
Thr-TGT-MT	20787.1	26585.3	26070.3	25490.6	20717.5	24382.6	28815	27910.7	24382.6	22228
Trp-TCA-MT	187138	122712	103798	97508.4	157118	111679	126112	107684	108613	116196
Tyr-GTA-MT	26824.5	35967.3	29446.2	33447.1	41330.7	40923.2	40630.5	40430.2	31520.7	34880.8
Val-TAC-MT	105103	97730.2	102023	102166	90257.5	87289.4	86282.4	85910.7	96970.7	91206
ecoliSpikeIn_Gln	19009.8	15336.6	15062.3	11655.6	16234.6	18834.7	16877.9	12458.9	15437.5	14811.9

## Sheet: DESeq2_Ca decoders
tRNA decoder	baseMean	log2FoldChange	lfcSE	stat	pvalue	padj
Val-AAC	4436.39	-1.06213	0.128006	64.431	9.99721e-16	7.29796e-14
Tyr-GTA	98024.6	-0.993588	0.169108	32.42	1.242e-08	4.53331e-07
Leu-TAA	99111.2	-0.577037	0.126473	20.1496	7.1616e-06	0.000174266
Ala-AGC	136390	-0.459013	0.10824	17.5397	2.8137e-05	0.0005135
Arg-TCG	252799	-0.542753	0.132581	16.2577	5.52832e-05	0.000807135
Ser-GGA	306.443	-0.801877	0.199416	15.5256	8.1394e-05	0.000990294
Ser-AGA	1621.54	-0.666067	0.17202	14.447	0.000144158	0.00139714
Thr-AGT	83260.3	-0.534096	0.138989	14.3336	0.000153111	0.00139714
Gln-CTG	419095	-0.636568	0.176697	12.5121	0.000404322	0.00299621
Phe-GAA	122010	-0.517887	0.144484	12.4841	0.000410439	0.00299621
Gly-GCC	24285.5	-0.330876	0.0958551	11.7125	0.000620821	0.00389348
Ser-CGA	127523	-0.576999	0.166275	11.6558	0.000640024	0.00389348
Gly-CCC	55856	-0.287223	0.0898455	10.0705	0.00150665	0.00785611
Ile-TAT	45133.6	-0.477256	0.148135	10.1122	0.00147291	0.00785611
Arg-ACG	185602	-0.493699	0.154658	9.91682	0.00163775	0.0079704
Leu-AAG	5638.86	-0.38536	0.129667	8.65601	0.00325984	0.014873
Thr-CGT	59901.3	-0.39165	0.133608	8.41544	0.00372047	0.0159762
Ala-TGC	43922.1	-0.314641	0.11083	7.92932	0.004864	0.0197262
Ile-AAT	51633.9	-0.384745	0.13757	7.66348	0.00563498	0.0205677
Glu-TTC	92793.8	-0.250233	0.0912178	7.43055	0.00641256	0.02197
Met-CAT	107691	-0.402318	0.146581	7.37298	0.0066211	0.02197
His-GTG	4646.19	-0.44372	0.164319	7.12094	0.00761887	0.0231741
Leu-TAG	19762.7	-0.269788	0.100254	7.14329	0.00752451	0.0231741
Val-TAC	20961.5	-0.304488	0.121039	6.22998	0.0125605	0.0352661
Pro-AGG	1352.32	-0.597253	0.238673	6.058	0.0138434	0.0374285
Gln-TTG	12419.7	-0.395127	0.161869	5.83488	0.0157114	0.040962
Trp-CCA	40359.2	-0.365206	0.151145	5.72695	0.0167064	0.0420542
Val-CAC	26981.8	-0.322452	0.134533	5.64938	0.0174616	0.0424898
Leu-CAA	26245.5	-0.265092	0.111785	5.54852	0.0184963	0.0435558
Sup-TCA	48.259	-0.918465	0.387836	5.38907	0.0202633	0.0462256
iMet-CAT	91512.5	-0.231834	0.102873	5.01972	0.0250603	0.0522686
Ala-CGC	30591.1	-0.280726	0.127598	4.7713	0.0289379	0.0586797
Arg-CCT	80848.4	-0.374355	0.174976	4.48744	0.0341447	0.0673666
Asn-GTT	523933	-0.290473	0.140739	4.19647	0.0405082	0.0771393
Ser-GCT	157496	-0.35162	0.171544	4.12444	0.0422681	0.0771393
Ser-TGA	157802	-0.352448	0.171305	4.15522	0.0415064	0.0771393
Lys-TTT	469007	-0.395789	0.196807	3.95976	0.0466004	0.0829715
Gly-TCC	57824.9	-0.206106	0.104612	3.84196	0.0499852	0.086879
Arg-CCG	96069.3	-0.296274	0.154042	3.64308	0.0563028	0.0955839
Thr-TGT	36721.6	-0.261996	0.137546	3.58017	0.0584732	0.0970124
Arg-TCT	38917.2	-0.288766	0.152998	3.50975	0.0610085	0.0989694
SeC-TCA	11526.4	-0.240646	0.132086	3.27943	0.0701534	0.11133
Leu-CAG	28434.8	-0.180458	0.111952	2.57528	0.108545	0.165079
Pro-TGG	49883.3	-0.37594	0.23066	2.60398	0.106596	0.165079
Glu-CTC	131362	-0.15747	0.101005	2.41187	0.120419	0.175811
Lys-CTT	124078	-0.287937	0.183502	2.42592	0.119343	0.175811
Pro-CGG	20412.7	-0.330404	0.226807	2.08589	0.148665	0.212795
Gly-ACC	25.7925	-0.393188	0.411322	0.904852	0.341484	0.45168
Asp-GTC	381522	-0.160828	0.215479	0.552687	0.457222	0.565715
Cys-GCA	3311.36	-0.0810965	0.156677	0.266888	0.605427	0.724527
Ala-TGC-MT	7207.46	0.00399279	0.120778	0.00109346	0.973621	0.997622
Arg-TCG-MT	13967.1	0.0727146	0.117798	0.382272	0.53639	0.652608
Asn-GTT-MT	13692.8	0.0206876	0.192882	0.0115148	0.914545	0.95374
Asp-GTC-MT	14637.4	0.023756	0.104165	0.0520676	0.819504	0.879761
Cys-GCA-MT	8481.18	0.0442419	0.155234	0.0813858	0.775428	0.867249
Gln-TTG-MT	13508.3	0.16672	0.199132	0.706007	0.400773	0.51327
Glu-TTC-MT	8116.71	0.0328745	0.127236	0.0668576	0.795968	0.867249
Gly-TCC-MT	20505.2	0.01558	0.104291	0.0223346	0.8812	0.932284
His-GTG-MT	10235.7	-0.175743	0.166964	1.09844	0.294608	0.405781
Ile-GAT-MT	16693.1	-0.211251	0.206615	1.03437	0.309135	0.417904
Leu1-TAA-MT	10120.5	-0.0417736	0.15861	0.0692297	0.792462	0.867249
Leu2-TAG-MT	23482.9	0.101962	0.108552	0.886255	0.346494	0.45168
Lys-TTT-MT	41823.4	0.0640293	0.0775546	0.683577	0.408358	0.513967
Met-CAT-MT	25535.8	0.0371384	0.110591	0.112965	0.736793	0.853744
Phe-GAA-MT	63173.3	-0.432112	0.162018	6.94926	0.00838539	0.0244853
Pro-TGG-MT	42099.9	0.000534363	0.112553	2.25789e-05	0.996209	0.997622
Ser1-TGA-MT	22559.9	-0.353581	0.125377	7.80733	0.00520349	0.0199923
Ser2-GCT-MT	25599	0.105625	0.0850457	1.54968	0.213183	0.299276
Thr-TGT-MT	24737	-0.000379027	0.127348	8.8823e-06	0.997622	0.997622
Trp-TCA-MT	123856	0.075985	0.18287	0.173241	0.677247	0.797404
Tyr-GTA-MT	35540.1	-0.285066	0.12532	5.09923	0.0239365	0.0513931
Val-TAC-MT	94493.9	0.18269	0.0800199	5.25311	0.0219076	0.0484622
ecoliSpikeIn_Gln	15572	-0.0473893	0.151789	0.0972571	0.755146	0.861339

## Sheet: sig_LRT_Ca decoders
	tRNA decoder	baseMean	log2FoldChange	lfcSE	stat	pvalue	padj
1	Val-AAC	4436.39	-1.06213	0.128006	64.431	9.99721e-16	7.29796e-14
2	Tyr-GTA	98024.6	-0.993588	0.169108	32.42	1.242e-08	4.53331e-07
3	Leu-TAA	99111.2	-0.577037	0.126473	20.1496	7.1616e-06	0.000174266
4	Ala-AGC	136390	-0.459013	0.10824	17.5397	2.8137e-05	0.0005135
5	Arg-TCG	252799	-0.542753	0.132581	16.2577	5.52832e-05	0.000807135
6	Ser-GGA	306.443	-0.801877	0.199416	15.5256	8.1394e-05	0.000990294
7	Ser-AGA	1621.54	-0.666067	0.17202	14.447	0.000144158	0.00139714
8	Thr-AGT	83260.3	-0.534096	0.138989	14.3336	0.000153111	0.00139714
9	Gln-CTG	419095	-0.636568	0.176697	12.5121	0.000404322	0.00299621
10	Phe-GAA	122010	-0.517887	0.144484	12.4841	0.000410439	0.00299621
11	Gly-GCC	24285.5	-0.330876	0.0958551	11.7125	0.000620821	0.00389348
12	Ser-CGA	127523	-0.576999	0.166275	11.6558	0.000640024	0.00389348
13	Gly-CCC	55856	-0.287223	0.0898455	10.0705	0.00150665	0.00785611
14	Ile-TAT	45133.6	-0.477256	0.148135	10.1122	0.00147291	0.00785611
15	Arg-ACG	185602	-0.493699	0.154658	9.91682	0.00163775	0.0079704
16	Leu-AAG	5638.86	-0.38536	0.129667	8.65601	0.00325984	0.014873
17	Thr-CGT	59901.3	-0.39165	0.133608	8.41544	0.00372047	0.0159762
18	Ala-TGC	43922.1	-0.314641	0.11083	7.92932	0.004864	0.0197262
19	Ile-AAT	51633.9	-0.384745	0.13757	7.66348	0.00563498	0.0205677
20	Glu-TTC	92793.8	-0.250233	0.0912178	7.43055	0.00641256	0.02197
21	Met-CAT	107691	-0.402318	0.146581	7.37298	0.0066211	0.02197
22	His-GTG	4646.19	-0.44372	0.164319	7.12094	0.00761887	0.0231741
23	Leu-TAG	19762.7	-0.269788	0.100254	7.14329	0.00752451	0.0231741
24	Val-TAC	20961.5	-0.304488	0.121039	6.22998	0.0125605	0.0352661
25	Pro-AGG	1352.32	-0.597253	0.238673	6.058	0.0138434	0.0374285
26	Gln-TTG	12419.7	-0.395127	0.161869	5.83488	0.0157114	0.040962
27	Trp-CCA	40359.2	-0.365206	0.151145	5.72695	0.0167064	0.0420542
28	Val-CAC	26981.8	-0.322452	0.134533	5.64938	0.0174616	0.0424898
29	Leu-CAA	26245.5	-0.265092	0.111785	5.54852	0.0184963	0.0435558
30	Sup-TCA	48.259	-0.918465	0.387836	5.38907	0.0202633	0.0462256
31	Phe-GAA-MT	63173.3	-0.432112	0.162018	6.94926	0.00838539	0.0244853
32	Ser1-TGA-MT	22559.9	-0.353581	0.125377	7.80733	0.00520349	0.0199923
33	Val-TAC-MT	94493.9	0.18269	0.0800199	5.25311	0.0219076	0.0484622
