# Supplementary material for: Molecular basis of neurodegeneration in a mouse model of Polr3-related disease
Source: eLife. 2024 Nov 5;13:RP95314. doi: 10.7554/eLife.95314 (PMC11537486; doi:10.7554/eLife.95314)
Supplement: Supplementary file 6. [file elife-95314-supp6.xlsx]

## Sheet: Legend Table S6
Supplementary File 6. tRNAseq analysis of WT and Polr3a-tamKI cerebella at P42. Tabs ordered from left to right contain (i) DESeq2 analysis (likelihood ratio test, LRT) for all tRNAs, (ii) DE tRNAs scored by LRT, (iii) DESeq2 analysis (LRT) of tRNA decoders, and (iv) DE tRNA decoders scored by LRT.

## Sheet: DESeq2_Cb tRNA
tRNA isodecoder	baseMean	log2FoldChange	lfcSE	stat	pvalue	padj
Gln-CTG-3	498.895	-1.03664	0.169112	36.2879	1.70217e-09	3.55755e-07
Arg-TCT-5-1	809.108	-0.868171	0.155088	30.4369	3.44906e-08	2.40285e-06
Gly-CCC-2	962.659	-1.01437	0.179571	30.715	2.98848e-08	2.40285e-06
Gly-GCC-1	5232.09	-0.827406	0.172847	22.2356	2.41156e-06	0.000126004
Arg-TCT-1-1	12593.9	-0.648934	0.145013	19.5991	9.55121e-06	0.00039924
Gln-TTG-2-1	224.445	-0.826664	0.188204	18.8992	1.37807e-05	0.000480029
Gly-CCC-3-1	985.128	-0.871266	0.199648	18.4668	1.72888e-05	0.000516194
Arg-CCT-2	3157.89	-0.614118	0.144063	17.8202	2.4279e-05	0.00063429
Lys-TTT-3-1	833.886	-0.82962	0.204173	16.0569	6.14677e-05	0.001334
Thr-TGT-2-1	408.924	-0.795022	0.1964	15.9855	6.3828e-05	0.001334
Arg-CCT-1-1	5101	-0.643949	0.164596	14.9851	0.000108366	0.00161775
Arg-TCT-3-1	4439.63	-0.549377	0.140301	15.0748	0.000103335	0.00161775
Gln-TTG-1-1	3257.04	-0.728793	0.183674	15.3593	8.88834e-05	0.00161775
Ser-AGA-2	755.817	-0.847758	0.215551	15.0149	0.000106666	0.00161775
Thr-AGT-1	206.574	-0.901396	0.232256	14.6553	0.000129069	0.00179836
Gln-TTG-3	2582.4	-0.680963	0.182217	13.6567	0.000219453	0.0028666
SeC-TCA-1-1	5385.4	-0.607954	0.165357	13.2559	0.00027173	0.00334068
Ala-AGC-1-1	746.158	-0.890438	0.251487	12.141	0.000493259	0.00572729
Thr-TGT-3	2189.39	-0.712035	0.204537	11.8298	0.000582902	0.00641192
Arg-ACG-2-1	7849.6	-0.627019	0.183004	11.5003	0.000695863	0.00722725
Val-AAC-2	1687.73	-0.585825	0.171781	11.421	0.000726183	0.00722725
Glu-CTC-1	119250	-0.532485	0.157875	11.1881	0.000823227	0.00782066
Glu-TTC-3	537.464	-0.778873	0.236053	10.6111	0.00112413	0.0102149
Lys-TTT-2	7041.52	-0.596083	0.181979	10.5264	0.00117682	0.0102482
Ala-TGC-5	127.661	-0.761842	0.234044	10.4102	0.00125322	0.0104769
Arg-CCT-4-1	25537.1	-0.467773	0.146735	10.0211	0.0015476	0.0124403
iMet-CAT-1	51351.1	-0.612483	0.194706	9.69888	0.0018438	0.0142724
Ala-TGC-7	159.362	-0.854738	0.27345	9.53909	0.00201142	0.0150138
Gly-GCC-2	1592.8	-0.44939	0.145836	9.37417	0.00220064	0.0158598
Lys-TTT-1	214421	-0.450141	0.148958	9.01071	0.00268403	0.0186987
Thr-AGT-3-1	16.9418	-1.40228	0.464857	8.91966	0.00282116	0.0190201
Asn-GTT-1-1	542.375	-0.558463	0.187125	8.7653	0.00307016	0.020052
Gln-CTG-1-1	125.318	-0.697112	0.242576	8.1349	0.00434212	0.0275001
Ala-TGC-8-1	23.73	-0.905315	0.322437	7.9106	0.00491459	0.0278401
Arg-CCG-3-1	25842	-0.421455	0.147652	8.04807	0.00455522	0.0278401
Gln-CTG-5-1	67.5014	-0.688461	0.24415	7.90544	0.00492863	0.0278401
Arg-TCG-1-1	38861.2	-0.480715	0.170506	7.83396	0.00512737	0.0282005
Arg-CCT-3-1	2754.49	-0.503092	0.1805	7.65245	0.00566953	0.0289721
Gly-CCC-4-1	16.6037	-1.00575	0.364675	7.648	0.00568351	0.0289721
Lys-CTT-2	18413.7	-0.484782	0.173017	7.73665	0.0054111	0.0289721
Met-CAT-4-1	958.84	-0.733729	0.275019	6.94312	0.00841421	0.0418707
Ala-AGC-5	9802.58	-0.569268	0.215486	6.8537	0.00884578	0.0429073
Ala-TGC-4-1	9237.55	-0.509655	0.194652	6.74902	0.0093799	0.0429073
Gln-CTG-4-1	143.176	-0.676788	0.257665	6.80618	0.00908431	0.0429073
Gly-GCC-3-1	1567.8	-0.416411	0.159495	6.73693	0.00944371	0.0429073
Arg-ACG-1	37110.3	-0.398577	0.153623	6.65498	0.00988791	0.0430536
Asn-GTT-2-1	643.437	-0.538369	0.206882	6.66485	0.00983328	0.0430536
Gly-GCC-4-1	20297.4	-0.398784	0.154996	6.54427	0.0105222	0.0448806
Ala-AGC-3-1	11102.6	-0.502918	0.197776	6.36734	0.011624	0.0485883
Arg-TCT-2-1	2856.11	-0.473838	0.187472	6.29971	0.0120757	0.0494869
Ala-AGC-2	13563.7	-0.539181	0.214789	6.19592	0.0128045	0.0504934
Ala-CGC-3	36.3295	-0.860598	0.343149	6.20933	0.0127079	0.0504934
Lys-CTT-3	50991.2	-0.416612	0.170895	5.87151	0.0153878	0.0595565
Ser-GCT-5-1	707.914	-0.650287	0.267968	5.76929	0.0163086	0.0619727
Ser-GCT-2-1	7620.77	-0.446046	0.185851	5.68485	0.017112	0.0638643
Arg-CCG-1-1	11591.4	-0.442541	0.185526	5.61602	0.017797	0.0652558
Val-CAC-3-1	2080.04	-0.412762	0.17404	5.55941	0.0183817	0.0662373
Phe-GAA-1	75991.8	-0.406201	0.175127	5.31723	0.0211156	0.0747992
Ser-GCT-4	548.564	-0.489006	0.213303	5.18221	0.0228192	0.079487
Arg-TCG-2-1	20245.5	-0.461187	0.202477	5.11698	0.0236929	0.0811771
Val-AAC-5-1	1994.69	-0.422334	0.187604	5.00776	0.025234	0.0850629
Gly-CCC-1	49733.9	-0.367685	0.166714	4.81409	0.028228	0.0901274
Phe-GAA-3-1	6188.89	-0.421737	0.191044	4.8147	0.028218	0.0901274
Ser-TGA-2	4183.75	-0.457321	0.207031	4.81371	0.0282341	0.0901274
Ser-TGA-1-1	72874.4	-0.418425	0.193759	4.60701	0.0318415	0.0993265
Asp-GTC-1	164638	-0.34882	0.165241	4.4132	0.0356619	0.108019
Ser-CGA-1-1	4088.53	-0.411608	0.19445	4.42794	0.0353551	0.108019
Gln-CTG-2	165278	-0.344809	0.163979	4.37956	0.0363724	0.108598
Leu-TAG-2-1	1512.06	-0.455608	0.218395	4.29449	0.0382361	0.112554
Leu-AAG-3-1	1210.09	-0.430577	0.210779	4.12064	0.0423631	0.122971
Gly-TCC-1	56081.2	-0.348839	0.171936	4.07669	0.0434787	0.12448
Thr-AGT-6-1	2788.55	-0.342717	0.172291	3.92087	0.0476903	0.132897
iMet-CAT-2-1	128.292	-0.508717	0.255162	3.93905	0.0471773	0.132897
Pro-TGG-1-1	9827.21	-0.288328	0.146806	3.82807	0.0504008	0.138602
Ser-CGA-3-1	601.995	0.415232	0.216157	3.70828	0.0541432	0.14696
Ala-AGC-8-1	49.0996	-0.529498	0.278626	3.59651	0.057901	0.154034
Ala-TGC-1-1	5994.45	-0.403764	0.211945	3.58729	0.0582232	0.154034
Asp-GTC-2-1	32872.2	-0.302358	0.16188	3.46043	0.062854	0.161782
Cys-GCA-15-1	31.9804	-0.573176	0.308897	3.4442	0.0634742	0.161782
Thr-CGT-2-1	9237.36	-0.338282	0.181002	3.46064	0.0628461	0.161782
Val-CAC-4-1	74.03	-0.450926	0.243636	3.41173	0.0647344	0.161817
iMet-CAT-3-1	498.454	-0.511013	0.274983	3.40406	0.0650363	0.161817
Val-CAC-2	28009.2	-0.323803	0.175843	3.36106	0.0667549	0.164139
Ala-TGC-6-1	3943.9	-0.291825	0.159976	3.3022	0.0691871	0.168141
Val-AAC-1	100.88	-0.447672	0.25097	3.15831	0.0755412	0.181473
Arg-ACG-3	25154.8	-0.287999	0.162289	3.12523	0.0770891	0.183087
Ala-AGC-6-1	21366.2	-0.349307	0.197671	3.09253	0.0786524	0.184701
Ala-AGC-10-1	35.1011	0.675601	0.390149	3.0184	0.0823247	0.191176
Arg-TCG-4-1	11769	-0.418907	0.242612	2.94529	0.0861284	0.196868
Ser-AGA-3-1	119.443	-0.364867	0.212589	2.93535	0.0866597	0.196868
His-GTG-1-1	280.966	-0.419551	0.2453	2.89412	0.088903	0.199793
Cys-GCA-9-1	33.35	-0.499917	0.29576	2.86566	0.0904886	0.201168
Ser-CGA-2-1	37438.1	-0.342405	0.202473	2.83291	0.092351	0.201168
Thr-AGT-5-1	1988.47	-0.279582	0.165537	2.83201	0.0924024	0.201168
Glu-CTC-2-1	40.8799	-0.424972	0.257555	2.7389	0.097932	0.204409
Glu-TTC-1	42818.4	-0.327953	0.197011	2.74627	0.0974816	0.204409
Lys-CTT-4-1	1495.89	-0.331228	0.198188	2.76835	0.0961449	0.204409
Ser-GCT-3-1	61918.6	-0.330202	0.199122	2.72511	0.0987815	0.204409
Tyr-GTA-2-1	342.358	-0.320129	0.192598	2.74349	0.0976511	0.204409
Leu-CAA-3-1	12598	-0.350644	0.212464	2.69728	0.10052	0.205967
Arg-TCG-3	45243.3	-0.298604	0.183317	2.63215	0.10472	0.210447
Val-AAC-4-1	2008.84	-0.366808	0.224302	2.64704	0.103743	0.210447
Leu-CAG-1	7827.59	-0.346916	0.213619	2.61217	0.106047	0.211084
Ala-AGC-4	103304	-0.322352	0.205489	2.43928	0.11833	0.233312
Ala-CGC-2-1	22047.8	-0.298575	0.191904	2.40137	0.121229	0.236793
Cys-GCA-12-1	15.578	-0.537089	0.353478	2.35752	0.12468	0.24128
Thr-AGT-7-1	176.986	-0.310068	0.203121	2.32148	0.127599	0.244662
Asn-GTT-3	226226	-0.298273	0.196698	2.28113	0.130957	0.248818
Leu-TAA-1-1	7961.6	-0.320524	0.21292	2.24659	0.133909	0.252135
Val-TAC-1	25335.6	-0.277958	0.186745	2.19926	0.138077	0.257661
Tyr-GTA-4-1	8052.93	-0.269816	0.182424	2.17227	0.140519	0.259897
Cys-GCA-18-1	20.2619	-0.477028	0.330637	2.13015	0.144427	0.26055
Ser-GCT-1-1	3147.86	-0.32	0.217086	2.1541	0.14219	0.26055
Ser-GGA-1-1	184.386	-0.314334	0.214968	2.12819	0.144611	0.26055
Lys-TTT-5-1	44.023	-0.379022	0.266568	2.03482	0.153733	0.274617
Cys-GCA-3	666.349	-0.288237	0.202966	2.00302	0.156986	0.275715
Pro-CGG-1	10806.4	-0.204787	0.144133	2.00847	0.156423	0.275715
Glu-TTC-2	27281.9	-0.270406	0.200089	1.81342	0.178098	0.307624
Trp-CCA-3	21.0809	-0.468044	0.354419	1.78367	0.181699	0.311271
Ala-AGC-7-1	6647.11	-0.262445	0.197779	1.74888	0.186018	0.316079
Val-CAC-1-1	1821.31	-0.289911	0.226827	1.62096	0.202959	0.339347
Thr-AGT-2-1	27354	-0.207726	0.164601	1.58438	0.208131	0.345232
Lys-CTT-14-1	30.7542	-0.413568	0.337654	1.50232	0.220315	0.359734
Lys-CTT-1-1	36.7878	-0.361121	0.301249	1.44508	0.22932	0.368676
Met-CAT-1	65337	-0.27547	0.227916	1.45025	0.228488	0.368676
Cys-GCA-2-1	149.869	-0.233043	0.197835	1.38832	0.23869	0.374208
Cys-GCA-8-1	440.906	-0.193093	0.164052	1.38105	0.239923	0.374208
Leu-AAG-1	6735.91	-0.330152	0.279519	1.38248	0.239678	0.374208
Thr-CGT-4-1	1286.05	-0.20052	0.169468	1.39333	0.237843	0.374208
Glu-CTC-5-1	14.6072	-0.508883	0.446365	1.34482	0.246186	0.381132
Cys-GCA-14-1	23.2891	-0.338742	0.330008	1.06236	0.302677	0.455553
Phe-GAA-2-1	4516.16	-0.213409	0.20663	1.06105	0.302975	0.455553
Ile-TAT-1-1	12234.3	-0.238899	0.235773	1.02044	0.312414	0.465639
Trp-CCA-6-1	47.3476	-0.368744	0.372253	0.979017	0.322442	0.474579
Leu-TAA-2-1	46703.3	-0.194983	0.198585	0.9594	0.327338	0.478417
Pro-TGG-3-1	254.617	-0.218493	0.224334	0.945684	0.33082	0.480149
Lys-CTT-6-1	25.3266	-0.28491	0.304617	0.889508	0.345611	0.492358
Pro-TGG-2	15062	-0.132051	0.139994	0.88697	0.3463	0.492358
Tyr-GTA-3	540.923	-0.175186	0.184525	0.897958	0.34333	0.492358
Thr-CGT-1-1	10132.9	-0.157783	0.168768	0.870712	0.350758	0.495328
Leu-TAA-3-1	12.4226	-0.501755	0.548248	0.838857	0.359724	0.504579
Cys-GCA-10-1	17.973	-0.407923	0.369675	1.2256	0.268265	0.412261
His-GTG-2	12250.5	-0.173129	0.200479	0.742634	0.388818	0.532099
Leu-CAA-1-1	3085.8	0.219615	0.255678	0.740418	0.389527	0.532099
Leu-CAA-4-1	1109.48	-0.210635	0.251421	0.698131	0.403412	0.547488
Thr-TGT-1-1	14520.3	-0.123901	0.149335	0.686407	0.407389	0.549318
Leu-TAG-1-1	8701.55	-0.167563	0.204038	0.671688	0.412464	0.552596
Tyr-GTA-1	45230	-0.149631	0.185402	0.64902	0.420463	0.559725
Arg-TCT-4-1	2346.84	0.135383	0.171772	0.622642	0.430067	0.568887
Ala-CGC-1	13556.3	-0.193692	0.255536	0.57178	0.449552	0.581091
Ala-TGC-2	29444.4	-0.182871	0.241757	0.569608	0.450415	0.581091
Leu-AAG-2-1	354.887	-0.207772	0.272067	0.580327	0.446184	0.581091
Trp-CCA-5-1	43028.6	-0.195482	0.256239	0.579178	0.446635	0.581091
Cys-GCA-17-1	66.3055	-0.202727	0.281225	0.5189	0.471311	0.604319
Ile-AAT-2-1	61.2645	-0.209081	0.292595	0.509798	0.475226	0.605624
Cys-GCA-5-1	19.8919	-0.229749	0.357109	0.441096	0.506594	0.63782
His-GTG-3-1	78.262	-0.182583	0.277225	0.43367	0.510194	0.638233
Met-CAT-6-1	69.3256	-0.197537	0.305733	0.418309	0.517782	0.640334
Gln-TTG-5-1	9.66415	-0.301441	0.481467	0.405893	0.524061	0.644287
Lys-CTT-5-1	11.656	-0.290011	0.474497	0.392501	0.530988	0.645212
Tyr-GTA-5-1	476.103	-0.153727	0.244145	0.395108	0.529626	0.645212
Leu-CAG-4-1	1240.85	-0.139358	0.226037	0.378857	0.538215	0.647852
Pro-AGG-1	556.792	-0.137037	0.222945	0.376728	0.53936	0.647852
Trp-CCA-2-1	8020.91	-0.161846	0.266173	0.368275	0.543946	0.649627
Leu-TAG-3-1	13389	-0.123645	0.205563	0.360743	0.548094	0.650861
Leu-CAG-3-1	26.6492	-0.225394	0.382268	0.350134	0.554037	0.654202
Asp-GTC-3-1	19.8103	-0.234681	0.443096	0.280692	0.596248	0.684703
Gly-ACC-1-1	41.3059	-0.171964	0.323593	0.284761	0.593597	0.684703
Ile-AAT-3-1	167.264	-0.16317	0.30221	0.290828	0.58969	0.684703
Ser-AGA-1-1	26.6563	-0.174543	0.340938	0.271295	0.602465	0.688061
Cys-GCA-24-1	15.7969	-0.18899	0.390972	0.235574	0.627421	0.712668
Thr-AGT-4-1	9811.39	0.00427875	0.16307	0.000688722	0.979063	0.98377
Leu-CAG-2	23827.2	-0.0913913	0.211614	0.186127	0.66616	0.752581
Ile-TAT-2	25289.4	-0.100903	0.240075	0.176238	0.674626	0.758048
Met-CAT-5-1	53.4913	0.143195	0.345289	0.172059	0.678289	0.758087
Ile-AAT-1	63729.3	-0.0657016	0.252235	0.0677478	0.794645	0.878734
Arg-CCG-2-1	10309.5	0.0370097	0.176898	0.0438032	0.83422	0.903378
Leu-CAA-2-1	15668.9	-0.0485763	0.230145	0.0445007	0.832925	0.903378
Val-CAC-5-1	15.8342	-0.0802438	0.395916	0.044138	0.833597	0.903378
Thr-CGT-3-1	7014.57	0.00936	0.15927	0.00345504	0.953128	0.971725
Cys-GCA-7-1	21.0092	-0.0580245	0.314379	0.0348117	0.851991	0.910228
Sup-TCA-1-1	8.82398	-0.0898582	0.493759	0.0380102	0.845423	0.910228
Val-CAC-7-1	10.5118	-0.0857877	0.484252	0.034045	0.853611	0.910228
Met-CAT-3-1	6655.09	-0.0275209	0.238674	0.0132874	0.90823	0.95387
Ala-CGC-4-1	18.6547	-0.0414731	0.523602	0.0106553	0.917785	0.959085
Met-CAT-2	21675.5	0.0161322	0.251312	0.00412221	0.948807	0.971725
Ala-TGC-MT	13476.8	0.00815885	0.164051	0.00247437	0.960327	0.974312
Arg-TCG-MT	12879.4	0.0176223	0.141993	0.0154091	0.90121	0.951277
Asn-GTT-MT	5528.37	6.14632e-06	0.1289	1.74409e-05	0.996668	0.996668
Asp-GTC-MT	8705.45	-0.177524	0.130197	1.85138	0.173622	0.302392
Cys-GCA-MT	8987.51	-0.0115187	0.168739	0.00465903	0.945581	0.971725
Gln-TTG-MT	5912.65	-0.280015	0.127349	4.79991	0.0284613	0.0901274
Glu-TTC-MT	13965.7	0.0910873	0.161982	0.316756	0.573564	0.673454
Gly-TCC-MT	15803.1	-0.0779142	0.119008	0.427884	0.513029	0.638233
His-GTG-MT	18376.1	-0.0738076	0.136865	0.290332	0.590008	0.684703
Ile-GAT-MT	10030.2	0.00988446	0.138307	0.00511482	0.942986	0.971725
Leu1-TAA-MT	6289.47	0.0399302	0.159599	0.0626572	0.802344	0.882579
Leu2-TAG-MT	12899.6	-0.350236	0.123881	7.91623	0.00489932	0.0278401
Lys-TTT-MT	27201.6	0.0497821	0.130101	0.146561	0.701844	0.780241
Met-CAT-MT	15028	-0.132602	0.14536	0.829577	0.362395	0.504937
Phe-GAA-MT	74159.3	0.194245	0.158133	1.51391	0.218543	0.35965
Pro-TGG-MT	32163.8	-0.0101442	0.127247	0.00635391	0.936467	0.971725
Ser1-TGA-MT	20279.5	0.108497	0.156887	0.479228	0.488772	0.619111
Ser2-GCT-MT	23684.4	-0.113399	0.130771	0.749976	0.386484	0.532099
Thr-TGT-MT	31724.8	-0.00624094	0.149491	0.00174265	0.966702	0.976042
Trp-TCA-MT	48865.9	0.165343	0.151101	1.20089	0.273144	0.416694
Tyr-GTA-MT	31772.7	0.175827	0.137974	1.62898	0.201845	0.339347
Val-TAC-MT	38824.6	0.0216051	0.154299	0.0196149	0.888618	0.942747
ecoliSpikeIn_Gln	24021.5	0.222349	0.221303	1.01319	0.31414	0.465639

## Sheet: sig_LRT_Cb tRNA
	gene	baseMean	log2FoldChange	lfcSE	stat	pvalue	padj
1	Gln-CTG-3	498.895	-1.03664	0.169112	36.2879	1.70217e-09	3.55755e-07
2	Arg-TCT-5-1	809.108	-0.868171	0.155088	30.4369	3.44906e-08	2.40285e-06
3	Gly-CCC-2	962.659	-1.01437	0.179571	30.715	2.98848e-08	2.40285e-06
4	Gly-GCC-1	5232.09	-0.827406	0.172847	22.2356	2.41156e-06	0.000126004
5	Arg-TCT-1-1	12593.9	-0.648934	0.145013	19.5991	9.55121e-06	0.00039924
6	Gln-TTG-2-1	224.445	-0.826664	0.188204	18.8992	1.37807e-05	0.000480029
7	Gly-CCC-3-1	985.128	-0.871266	0.199648	18.4668	1.72888e-05	0.000516194
8	Arg-CCT-2	3157.89	-0.614118	0.144063	17.8202	2.4279e-05	0.00063429
9	Lys-TTT-3-1	833.886	-0.82962	0.204173	16.0569	6.14677e-05	0.001334
10	Thr-TGT-2-1	408.924	-0.795022	0.1964	15.9855	6.3828e-05	0.001334
11	Arg-CCT-1-1	5101	-0.643949	0.164596	14.9851	0.000108366	0.00161775
12	Arg-TCT-3-1	4439.63	-0.549377	0.140301	15.0748	0.000103335	0.00161775
13	Gln-TTG-1-1	3257.04	-0.728793	0.183674	15.3593	8.88834e-05	0.00161775
14	Ser-AGA-2	755.817	-0.847758	0.215551	15.0149	0.000106666	0.00161775
15	Thr-AGT-1	206.574	-0.901396	0.232256	14.6553	0.000129069	0.00179836
16	Gln-TTG-3	2582.4	-0.680963	0.182217	13.6567	0.000219453	0.0028666
17	SeC-TCA-1-1	5385.4	-0.607954	0.165357	13.2559	0.00027173	0.00334068
18	Ala-AGC-1-1	746.158	-0.890438	0.251487	12.141	0.000493259	0.00572729
19	Thr-TGT-3	2189.39	-0.712035	0.204537	11.8298	0.000582902	0.00641192
20	Arg-ACG-2-1	7849.6	-0.627019	0.183004	11.5003	0.000695863	0.00722725
21	Val-AAC-2	1687.73	-0.585825	0.171781	11.421	0.000726183	0.00722725
22	Glu-CTC-1	119250	-0.532485	0.157875	11.1881	0.000823227	0.00782066
23	Glu-TTC-3	537.464	-0.778873	0.236053	10.6111	0.00112413	0.0102149
24	Lys-TTT-2	7041.52	-0.596083	0.181979	10.5264	0.00117682	0.0102482
25	Ala-TGC-5	127.661	-0.761842	0.234044	10.4102	0.00125322	0.0104769
26	Arg-CCT-4-1	25537.1	-0.467773	0.146735	10.0211	0.0015476	0.0124403
27	iMet-CAT-1	51351.1	-0.612483	0.194706	9.69888	0.0018438	0.0142724
28	Ala-TGC-7	159.362	-0.854738	0.27345	9.53909	0.00201142	0.0150138
29	Gly-GCC-2	1592.8	-0.44939	0.145836	9.37417	0.00220064	0.0158598
30	Lys-TTT-1	214421	-0.450141	0.148958	9.01071	0.00268403	0.0186987
31	Thr-AGT-3-1	16.9418	-1.40228	0.464857	8.91966	0.00282116	0.0190201
32	Asn-GTT-1-1	542.375	-0.558463	0.187125	8.7653	0.00307016	0.020052
33	Gln-CTG-1-1	125.318	-0.697112	0.242576	8.1349	0.00434212	0.0275001
34	Ala-TGC-8-1	23.73	-0.905315	0.322437	7.9106	0.00491459	0.0278401
35	Arg-CCG-3-1	25842	-0.421455	0.147652	8.04807	0.00455522	0.0278401
36	Gln-CTG-5-1	67.5014	-0.688461	0.24415	7.90544	0.00492863	0.0278401
37	Arg-TCG-1-1	38861.2	-0.480715	0.170506	7.83396	0.00512737	0.0282005
38	Arg-CCT-3-1	2754.49	-0.503092	0.1805	7.65245	0.00566953	0.0289721
39	Gly-CCC-4-1	16.6037	-1.00575	0.364675	7.648	0.00568351	0.0289721
40	Lys-CTT-2	18413.7	-0.484782	0.173017	7.73665	0.0054111	0.0289721
41	Met-CAT-4-1	958.84	-0.733729	0.275019	6.94312	0.00841421	0.0418707
42	Ala-AGC-5	9802.58	-0.569268	0.215486	6.8537	0.00884578	0.0429073
43	Ala-TGC-4-1	9237.55	-0.509655	0.194652	6.74902	0.0093799	0.0429073
44	Gln-CTG-4-1	143.176	-0.676788	0.257665	6.80618	0.00908431	0.0429073
45	Gly-GCC-3-1	1567.8	-0.416411	0.159495	6.73693	0.00944371	0.0429073
46	Arg-ACG-1	37110.3	-0.398577	0.153623	6.65498	0.00988791	0.0430536
47	Asn-GTT-2-1	643.437	-0.538369	0.206882	6.66485	0.00983328	0.0430536
48	Gly-GCC-4-1	20297.4	-0.398784	0.154996	6.54427	0.0105222	0.0448806
49	Ala-AGC-3-1	11102.6	-0.502918	0.197776	6.36734	0.011624	0.0485883
50	Arg-TCT-2-1	2856.11	-0.473838	0.187472	6.29971	0.0120757	0.0494869
51	Leu2-TAG-MT	12899.6	-0.350236	0.123881	7.91623	0.00489932	0.0278401

## Sheet: DESeq2_Cb decoders
tRNA decoder	baseMean	log2FoldChange	lfcSE	stat	pvalue	padj
Arg-TCT	23045.6	-0.531725	0.117065	20.293	6.64429e-06	0.000478389
Gln-TTG	6063.88	-0.712168	0.167835	17.5745	2.7627e-05	0.000681928
Arg-CCT	36550.5	-0.507255	0.120244	17.5211	2.84137e-05	0.000681928
SeC-TCA	5385.4	-0.607881	0.149866	16.1351	5.89821e-05	0.00106168
Glu-CTC	119306	-0.532452	0.140395	14.1457	0.000169182	0.00231373
Ser-AGA	901.917	-0.760158	0.203627	13.5828	0.000228264	0.00234785
Gly-GCC	28690.1	-0.478221	0.136252	12.1421	0.00049295	0.0039436
Lys-TTT	222340	-0.456085	0.129531	12.2303	0.000470208	0.0039436
iMet-CAT	51977.8	-0.611321	0.187486	10.4211	0.00124587	0.00897025
Lys-CTT	70993.6	-0.432365	0.147844	8.44472	0.00366106	0.0228035
Arg-ACG	70114.6	-0.383681	0.131846	8.37671	0.00380059	0.0228035
Gly-CCC	51698.2	-0.388381	0.150891	6.55203	0.0104764	0.0538788
Val-AAC	5792.15	-0.450508	0.180062	6.17725	0.0129403	0.0621136
Phe-GAA	86696.9	-0.397139	0.162379	5.91393	0.0150216	0.0675972
Arg-TCG	116119	-0.399563	0.172788	5.2863	0.0214938	0.0802995
Gln-CTG	166113	-0.347438	0.14782	5.47141	0.01933	0.0802995
Asp-GTC	197530	-0.34106	0.14855	5.2218	0.0223054	0.0802995
Arg-CCG	47742.9	-0.325401	0.140524	5.31469	0.0211464	0.0802995
Ser-TGA	77058.1	-0.420534	0.184863	5.11184	0.0237631	0.0814736
Gly-TCC	56081.2	-0.348837	0.158311	4.80858	0.0283183	0.0926782
Val-CAC	32000.4	-0.327778	0.164193	3.94962	0.0468819	0.146761
Ala-AGC	166617	-0.36929	0.196623	3.49098	0.0617041	0.185112
Ser-GCT	73943.7	-0.345797	0.188651	3.3278	0.0681178	0.196179
Ser-CGA	42128.6	-0.337931	0.19251	3.05282	0.0805972	0.223192
Pro-CGG	10806.4	-0.20472	0.122234	2.79083	0.094805	0.240884
Pro-TGG	25143.9	-0.193795	0.116503	2.75381	0.0970228	0.240884
Glu-TTC	70637.8	-0.309005	0.190039	2.62189	0.105399	0.244797
Thr-TGT	17118.6	-0.211856	0.129433	2.66503	0.102576	0.244797
Cys-GCA	1522.56	-0.26744	0.166727	2.55622	0.109861	0.247188
Asn-GTT	227412	-0.299547	0.189005	2.49165	0.114452	0.248273
Val-TAC	25335.6	-0.277957	0.176793	2.45381	0.11724	0.248273
Ser-GGA	184.386	-0.314139	0.212096	2.1838	0.139469	0.278939
Leu-AAG	8300.89	-0.339347	0.260857	1.6765	0.19539	0.360719
Ala-TGC	48931.1	-0.283133	0.215551	1.71245	0.190668	0.360719
Ala-CGC	35659.1	-0.25896	0.208401	1.53368	0.215562	0.378145
Thr-CGT	27670.8	-0.176822	0.145678	1.46689	0.225837	0.378145
Thr-AGT	42342.9	-0.174484	0.143203	1.47828	0.224043	0.378145
Leu-TAA	54677.4	-0.213228	0.191318	1.23552	0.266337	0.435824
Tyr-GTA	54642.3	-0.168603	0.173269	0.942988	0.331511	0.497266
His-GTG	12609.7	-0.178543	0.193593	0.846867	0.35744	0.524858
Met-CAT	94749.2	-0.194644	0.233555	0.691199	0.405757	0.572833
Leu-TAG	23602.6	-0.160706	0.19749	0.659607	0.416699	0.576967
Leu-CAG	32922.3	-0.153408	0.203823	0.564402	0.452492	0.603323
Trp-CCA	51117.9	-0.190474	0.26065	0.531503	0.465976	0.610004
Ile-TAT	37523.7	-0.145673	0.238258	0.372521	0.541633	0.64996
Leu-CAA	32462.2	-0.144246	0.222938	0.417197	0.518339	0.64996
Pro-AGG	556.792	-0.137042	0.222267	0.379055	0.538109	0.64996
Gly-ACC	41.3059	-0.171712	0.346127	0.247403	0.61891	0.729363
Ile-AAT	63957.8	-0.0660896	0.256708	0.0661817	0.79698	0.896602
Ala-TGC-MT	13476.8	0.00814526	0.148314	0.00301754	0.956193	0.97505
Arg-TCG-MT	12879.4	0.0175744	0.119414	0.0216696	0.88297	0.96324
Asn-GTT-MT	5528.37	-0.000259451	0.100793	8.26343e-05	0.992747	0.992747
Asp-GTC-MT	8705.45	-0.177586	0.102846	2.96941	0.0848526	0.226274
Cys-GCA-MT	8987.51	-0.011503	0.154256	0.00556004	0.94056	0.97505
Gln-TTG-MT	5912.65	-0.279974	0.0985498	8.01388	0.00464201	0.0257096
Glu-TTC-MT	13965.7	0.0910707	0.145677	0.391486	0.53152	0.64996
Gly-TCC-MT	15803.1	-0.0779018	0.0858303	0.822382	0.364485	0.524858
His-GTG-MT	18376.1	-0.0738148	0.112433	0.430298	0.511843	0.64996
Ile-GAT-MT	10030.2	0.0098118	0.114333	0.00738465	0.931519	0.97505
Leu1-TAA-MT	6289.47	0.039913	0.142569	0.0784584	0.779397	0.89074
Leu2-TAG-MT	12899.6	-0.350233	0.0934919	13.8999	0.00019281	0.00231373
Lys-TTT-MT	27201.6	0.0498145	0.102876	0.234697	0.628063	0.729363
Met-CAT-MT	15028	-0.132563	0.123947	1.14031	0.285586	0.447004
Phe-GAA-MT	74159.3	0.194249	0.140736	1.91139	0.166809	0.324602
Pro-TGG-MT	32163.8	-0.0101229	0.0987132	0.0105147	0.918327	0.97505
Ser1-TGA-MT	20279.5	0.108486	0.139115	0.60936	0.435029	0.590982
Ser2-GCT-MT	23684.4	-0.113359	0.103823	1.18899	0.275534	0.440854
Thr-TGT-MT	31724.8	-0.00624902	0.129476	0.00232925	0.961507	0.97505
Trp-TCA-MT	48865.9	0.165354	0.131595	1.5835	0.208257	0.374862
Tyr-GTA-MT	31772.7	0.175816	0.113991	2.38626	0.122406	0.251807
Val-TAC-MT	38824.6	0.0216	0.135756	0.025327	0.873555	0.96324
ecoliSpikeIn_Gln	24021.5	0.22235	0.219204	1.03268	0.309529	0.474172

## Sheet: sig_LRT_Cb decoders
	tRNA decoder	baseMean	log2FoldChange	lfcSE	stat	pvalue	padj
1	Arg-TCT	23045.6	-0.531725	0.117065	20.293	6.64429e-06	0.000478389
2	Arg-CCT	36550.5	-0.507255	0.120244	17.5211	2.84137e-05	0.000681928
3	Gln-TTG	6063.88	-0.712168	0.167835	17.5745	2.7627e-05	0.000681928
4	SeC-TCA	5385.4	-0.607881	0.149866	16.1351	5.89821e-05	0.00106168
5	Glu-CTC	119306	-0.532452	0.140395	14.1457	0.000169182	0.00231373
6	Ser-AGA	901.917	-0.760158	0.203627	13.5828	0.000228264	0.00234785
7	Gly-GCC	28690.1	-0.478221	0.136252	12.1421	0.00049295	0.0039436
8	Lys-TTT	222340	-0.456085	0.129531	12.2303	0.000470208	0.0039436
9	iMet-CAT	51977.8	-0.611321	0.187486	10.4211	0.00124587	0.00897025
10	Arg-ACG	70114.6	-0.383681	0.131846	8.37671	0.00380059	0.0228035
11	Lys-CTT	70993.6	-0.432365	0.147844	8.44472	0.00366106	0.0228035
12	Gln-TTG-MT	5912.65	-0.279974	0.0985498	8.01388	0.00464201	0.0257096
13	Leu2-TAG-MT	12899.6	-0.350233	0.0934919	13.8999	0.00019281	0.00231373
