# Supplementary material for: Molecular basis of neurodegeneration in a mouse model of Polr3-related disease
Source: eLife. 2024 Nov 5;13:RP95314. doi: 10.7554/eLife.95314 (PMC11537486; doi:10.7554/eLife.95314)
Supplement: Supplementary file 7. [file elife-95314-supp7.xlsx]

## Sheet: Legend Table S7
Supplementary File 7. Oligo sequences. Oligonucleotides used for mouse genotyping, hybridization probes, RT-qPCR, mitogenome determination and tRNA spike-in.

## Sheet: Oligonucleotides
Description		DNA Sequence		gtrnadb name
Hybridization oligos
pretRNA Ile(TAT)		ATCGCTTACGCCTAGCACTG	n-Ti16	tRNA-Ile-TAT-1
pretRNA Leu(CAA)		CCCGTAGGTAAGGCTTGTCA	n-Tl12	tRNA-Leu-CAA-3-1
pretRNA Ser(CGA)		ACTCGGCCATCACAGCTAACC	n-Ts12	tRNA-Ser-CGA-3-1
mature Leu(CAA)		CTCCATTCGGAGACCAGAAc	n-Tl12	tRNA-Leu-CAA-3-1
mature iMet(CAT)		GATGGTTTCGATCCATCGAC		tRNA-iMet-CAT
mature Ser(CGA)		ACTCGGCCATCACAGCTAACC		tRNA-Ser-CGA-1-1, 3-1, 2-1
mature His(GTG)		CTATACGATCACGGCGAGCTACC		tRNA-His-GTG
U3		GGAGGGAAGAACGATCATCA
U6		AGGGGCCATGCTAATCTTCT
7SK		GCGCAGCTACTCGTATACCC
7SL		ATCAGCACGGGAGTTTTGAC
RppH1		CTGCTCTCTGGGAACTCACC
Cre recombination efficiency		DNA Sequence
Polr3a Exon14	Ref For	TGCCCCCTCCTTTCCTCTAG
Polr3a Exon14	Ref Rev	AAAAGGACCACTCTGACCCCCG
Polr3a mutExon 15	5qFW3	CCACCATCAGAGATTTCTGACGTC
Polr3a mutExon 15	GoKRV6	CTGGGAAAAGCTAAAAAGATTGTGCTAGACTTAGATCATA
RT-qPCR oligos		DNA Sequence	Reference
preSer n-Ts12	For	GTGGTTAAGGCGTTGGACTC	this work
	Rev	TTTGACCACACTTCCACAGAA
preGlu n-Te5/7/8	For	TCCCTGGTGGTCTAGTGGTT	this work
	Rev	GAAGTGAGGGTGCAGAGAGG
7SL	For	GCACTAAGTTCGGCATCAATATG	this work
	Rev	CTGATCAGCACGGGAGTTT
vaultrc5	For	GGTTACTTCGACAGTGGTTCA	this work
	Rev	AAACACTCACGGGTTAGGTAAG
BC1	For	ACACTCCAGCTGGGTTCGGTCCTCAGCTCTGGAA	Wang et al., 2018 J Biol Chem. 293: 5668–5678. doi: 10.1074/jbc.RA117.001578.
	Rev	CTCAACTGGTGTCGTGGAGTCGGCAATTCAGTTGAGTGTGCCAGTTACCTTGTT
5SrRNA	For	GGCCATACCACCCTGAACGC	this work
	Rev	CAGCACCCGGTATTCCCAGG
U6	For	GCTTCGGCAGCACATATACTA	this work
	Rev	CGAATTTGCGTGTCATCCTTG
U6atac	For	GAAAGGAGAGAAGGTTAGCACTC	this work
	Rev	GTGGTTAGATGCCACGAAGTAG
Actb	For	CTAAGGCCAACCGTGAAAAGAT	Yeganeh and Hernandez 2017 Genes Dev. 31:413-421. doi: 10.1101/gad.293324.116.
	Rev	CACAGCCTGGATGGCTACGT
Gapdh	For	AGGTCGGTGTGAACGGATTTG	Yeganeh and Hernandez 2017 Genes Dev. 31:413-421. doi: 10.1101/gad.293324.116.
	Rev	TGTAGACCATGTAGTTGAGGTCA
tubulin g	For	ATGCCGAGAGAAATCATCACCC
	Rev	CCGTGGCGAACTCTTCTACG
7SK	For	TCGGTCAAGGGTATACGAGTAG	this work
	Rev	TTTGGATGTGTCTGGAGTCTTG
RppH1	For	GGAGCTTGGAACAGACTCAC	this work
	Rev	GGAGAGTAGTCTGAATTGGGTTATG
RMRP	For	ACACGCGCGTAGACTTCC	this work
	Rev	CACTGCCTGCGTCACTATGT
XBP RT-qPCR		DNA Sequence	Reference
	uXBPfor	CAGACTACGTGCACCTCTGC	Yoon et al., 2019 PLoS ONE 14:e0219978. doi: 10.1371/journal.pone.0219978
	usXBPrev	CAGGGTCCAACTTGTCCAGAAT
	sXBPfor	GCTGAGTCCGCAGCAGGT
	tXBPfor	TGAAAAACAGAGTAGCAGCGCAGA
	tXBPrev	CCCAAGCGTGTTCTTAACTC
ATF4-dependent ISR RT-qPCR		DNA Sequence	Reference
	Aldh1l2for	GAGGAGCTTCTGCCATCAAC	Ishimura et al., 2016 elife 5:e14295. doi: 10.7554/eLife.14295.
	Aldh1l2rev	GCGAGTCCACTGTGTCATTG
	Asnsfor	AAGATGGGTTTCTGGCTGTG
	Asnsrev	GCAACTTTGCCATTTGGTTT
	Atf5for	CCTGTGGATTAAAGGGGGTA
	Atf5rev	AGCGTGGAAGATTGTTCAGC
	Chac1for	GTACGGCTCCCTAGTGTGGA
	Chac1rev	TCTTCAAGGAGGGTCACCAC
	Cyb5r1for	GCTTTCTGCTTTTTGCCAAC
	Cyb5r1rev	CAAAGCCCTTGCTGTAGGTC
	Ddr2for	TGATGGAGCTGTTGGGTACA
	Ddr2rev	CCGTTGGTAGCACTTTCGTT
	Eif4ebp1for	CTAGCCCTACCAGCGATGAG
	Eif4ebp1rev	CTTGGGGGACATAGAAGCAT
	Mthfd2for	CCGCCAGTCACTCCTATGTT
	Mthfd2rev	GGAGGCCATCTACGTTCTCA
	Sesn2for	CCTTCTCCACACCCAGACAT
	Sesn2rev	AGCCTCTGGATCAGCGAGTA
	Stc2for	GATTCATTTCAAGGATCTCC
	Stc2rev	GGTTCACAAGGTCCACATAG
mtDNA/nDNA Ratio qPCR		DNA Sequence	Reference
	16SrRNAfor	CCGCAAGGGAAAGATGAAAGAC	Quiros et al., 2017 Curr. Protoc. Mouse Biol. 7:47-54. doi: 10.1002/cpmo.21
	16SrRNArev	TCGTTTGGTTTCGGGGTTTC
	ND1for	CTAGCAGAAACAAACCGGGC
	ND1rev	CCGGCTGCGTATTCTACGTT
	HK2for	GCCAGCCTCTCCTGATTTTAGTGT
	HK2rev	GGGAACACAAAAGACCTCTTCTGG
Spike-in for tRNAseq		RNA Sequence
		UGCGGUAUCGCCAAGCGGUAAGGCACCGGAUUCUGAUUCCGGCAUUCCGAGGUUCGAAUCCUCGUACCGCAGCCA
